# Supplementary material for: Genome-wide Transcriptomic Analysis of Toxoplasma gondii Reveals Stage-specific Regulatory Programs and Metabolic Adaptations Driving Oocyst Sporulation
Source: bioRxiv preprint, doi:10.1101/2025.09.10.674405, version 1 (2025-09-11)
Supplement: Supplemental Table 1 [file 674405_file20.xlsx]

## Sheet: Contents
	Mean expression values for all life cycle stages (only expressed genes, i.e. normalized counts >5)
1.1	log2 (normalized counts +1)
1.2	Normalized counts
1.3	TPMs
1.4	Normalized to expression maximum (%)

## Sheet: 1.1
ToxoDB ID Release 68	Product Description	Gene Name	Tachyzoites	Bradyzoites	EES1	EES2	EES3	EES4	EES5	Unsporulated oocysts	Sporulating oocysts	Sporulated oocysts
TGME49_310580	1,3(4)-beta-glucanase	N/A	0.83607	1.82339	9.96226	9.81944	10.1969	10.2213	10.4212	6.66292	7.80837	4.09309
TGME49_278110	1,3-beta-glucan synthase component protein	N/A	9.80684	9.36267	9.93479	9.81885	10.4595	10.3496	11.2007	10.1271	10.6633	9.82899
TGME49_316520	1,4-alpha-glucan-branching enzyme	SBE1	9.80396	10.7023	11.6853	11.7058	11.9166	12.0053	12.386	3.35284	3.76243	7.43099
TGME49_263090	14-3-3 protein	N/A	14.2724	14.3026	15.0131	14.8923	14.62	14.8359	15.03	12.081	12.4027	13.1526
TGME49_269582	14-3-3 protein	N/A	0.734324	1.13777	7.01189	8.5787	9.30772	9.55899	10.7428	11.0602	11.487	8.75188
TGME49_227952	14-3-3 superfamily protein	N/A	10.1818	10.2764	6.41988	7.99851	7.86513	7.59319	7.00203	9.93269	10.6362	10.1676
TGME49_321310	16S rRNA processing protein RimM domain-containing protein	N/A	8.36887	9.71949	7.82404	7.54066	7.17463	7.38822	6.48124	3.1595	3.41921	9.63392
TGME49_232390	18S rRNA biogenesis protein RCL1 protein	N/A	8.32568	7.34403	8.73683	8.70501	8.79636	8.36868	7.87703	7.93458	8.2919	7.47973
TGME49_214850	1-deoxy-D-xylulose 5-phosphate reductoisomerase, putative	N/A	8.22055	7.86708	9.13472	8.93047	8.80972	8.84167	8.43312	1.16892	0	9.58076
TGME49_208820	1-deoxy-D-xylulose-5-phosphate synthase	N/A	9.1516	7.80057	9.82473	9.55096	9.44307	9.34633	8.63301	10.5074	11.0225	8.62059
TGME49_295140	1-phosphatidylinositol 4-kinase	N/A	1.45738	2.16846	0	1.0478	1.68381	1.27147	1.75939	0.981132	0	2.78421
TGME49_226300	2,4-dienoyl CoA reductase 2, peroxisomal family protein	N/A	1.14104	1.82339	7.04402	8.66763	9.24428	10.0482	12.0795	17.0787	17.7102	12.2018
TGME49_232750	23S rRNA (adenine(1618)-N(6))-methyltransferase, putative	N/A	10.2872	11.5838	10.1869	10.047	9.47709	9.8136	8.68593	9.51155	9.62981	9.48313
TGME49_267080	26S protease regulatory subunit 4, putative	N/A	11.2847	11.3722	11.7642	11.603	11.4631	11.5322	11.9264	12.5974	12.0772	12.5082
TGME49_228210	26S proteasome regulatory subunit	N/A	10.5511	10.3253	10.7794	10.7689	10.5377	10.6851	11.0989	13.6772	13.6806	10.5393
TGME49_229950	26S proteasome regulatory subunit 6b, putative	N/A	10.8069	10.1262	11.1148	11.2073	11.0455	11.1262	11.3462	10.4932	10.4504	10.6806
TGME49_277500	26S proteasome regulatory subunit 7, putative	N/A	11.1444	10.3572	10.8732	10.7981	10.7725	10.7244	11.2883	10.9456	10.5641	10.2547
TGME49_250830	26S proteasome regulatory subunit RPN12, putative	N/A	10.5852	9.84577	10.6554	10.6337	10.5239	10.6249	10.9378	10.6074	10.7277	8.21086
TGME49_224110	26S proteasome regulatory subunit RPN13, putative	N/A	10.2888	10.0793	10.0326	10.1377	10.0221	9.9224	10.4543	12.014	11.7508	10.9804
TGME49_238180	26S proteasome regulatory subunit RPN7, putative	N/A	10.8092	10.1927	10.9641	10.811	10.7285	10.8084	11.1576	12.6165	12.802	10.3968
TGME49_300310	26S proteasome regulatory subunit, S6a family AAA ATpase	N/A	11.2825	11.0305	11.5384	11.399	11.2854	11.391	11.7087	11.9196	11.2921	11.375
TGME49_261210	26s proteasome subunit p55, putative	N/A	10.6968	10.5714	11.4288	11.2012	10.9243	11.3187	11.2653	10.1699	10.8863	10.3822
TGME49_247850	28 kDa A-kinase anchor, putative	N/A	5.68513	7.52947	5.23433	6.59644	7.41455	7.63848	8.94464	10.1493	10.7303	8.07898
TGME49_255690	2-C-methyl-D-erythritol 2,4-cyclodiphosphate synthase domain-containing protein	N/A	8.39877	7.46699	9.46191	8.90429	8.88688	8.87003	8.48687	1.38207	0.540102	5.84362
TGME49_306260	2-C-methyl-D-erythritol 4-phosphate cytidylyltransferase, putative	ISPD	9.33255	9.21017	9.16968	9.01072	8.67821	8.83708	8.68149	11.0228	11.5357	9.08227
TGME49_319920	2-oxo acid dehydrogenases acyltransferase (catalytic domain) domain-containing protein	N/A	10.2155	7.9353	11.7596	11.8369	11.7809	11.6698	12.3755	9.29568	8.29401	10.232
TGME49_244200	2-oxoglutarate dehydrogenase e1 component, mitochondrial precursor, putative	N/A	10.9198	10.5412	11.5485	11.3479	11.273	11.1541	10.9837	6.22113	6.61636	8.51728
TGME49_274060	2-oxoglutarate/malate translocase OMT	OMT	11.2519	12.5443	11.4847	11.556	11.1709	11.4313	11.5674	13.4171	14.1379	10.379
TGME49_239490	2-oxoisovalerate dehydrogenase subunit alpha	BCKDH-E1a	11.401	10.5911	12.7855	12.7547	12.8278	12.8858	13.7851	10.8775	10.4346	11.1736
TGME49_292100	2-oxoisovalerate dehydrogenase subunit alpha, putative	N/A	7.5865	8.51529	6.44494	6.61637	7.82238	8.34294	10.714	15.0522	15.9902	10.1757
TGME49_202750	3' exoribonuclease family, domain 1 domain-containing protein	N/A	8.38584	7.33876	8.93641	9.1298	9.11737	9.15276	9.01451	7.59377	7.48197	11.1815
TGME49_231040	3' exoribonuclease family, domain 1 domain-containing protein	N/A	8.12088	7.96448	9.21782	9.37885	9.14834	9.29595	9.48065	13.2843	14.2442	9.96063
TGME49_306610	3' exoribonuclease family, domain 1 domain-containing protein	N/A	7.76866	8.53864	8.05155	8.53136	8.27115	8.45207	7.81151	5.01573	5.70217	6.66805
TGME49_319650	3' exoribonuclease family, domain 1 domain-containing protein	N/A	8.48643	8.31513	8.61352	8.40569	8.35349	8.41494	7.77711	5.67632	6.8406	8.51155
TGME49_223672	3'(2'),5'-bisphosphate nucleotidase	N/A	8.48335	9.88732	10.4457	10.3397	10.2605	10.5683	10.4596	9.86268	10.6917	8.2346
TGME49_500228	30S ribosomal protein S10, putative	N/A	9.04427	8.59284	9.27598	8.73855	8.66385	8.69804	8.17781	3.34817	3.96789	2.25079
TGME49_219770	30S ribosomal protein S12, putative	N/A	8.38779	8.47211	8.93477	8.77824	8.7008	8.75521	8.39081	4.11291	2.52073	9.82511
TGME49_216040	30S ribosomal protein S15, putative	N/A	8.85904	7.83165	8.90015	9.17363	9.21631	8.92175	8.5968	7.37578	6.81297	9.67783
TGME49_318420	30S ribosomal protein S16, putative	N/A	8.45533	7.5195	9.02825	9.10804	8.68164	8.96679	8.32861	6.74123	6.01826	9.30599
TGME49_285970	30S ribosomal protein S5, putative	N/A	8.81103	8.75138	9.54753	9.49086	9.46992	9.35725	9.2324	10.1523	9.95049	8.92947
TGME49_246970	3'-5' exonuclease domain-containing protein	N/A	8.54535	8.44192	9.30978	9.24174	9.2742	9.21856	8.40959	8.30819	9.10881	7.6358
TGME49_250890	3'-5' exonuclease domain-containing protein	N/A	6.8239	7.25894	7.93503	7.81807	7.64185	7.5565	6.88133	4.49164	3.3172	6.85162
TGME49_273100	3'-5' exonuclease domain-containing protein	N/A	7.33711	6.66154	7.68652	7.24276	7.15072	7.07046	6.75359	5.73052	4.90278	7.59578
TGME49_275830	3'-5' exonuclease, putative	N/A	7.61298	6.70075	7.80572	7.66151	7.87541	7.70927	7.94057	7.15768	6.05844	7.07344
TGME49_203610	3'-5' exoribonuclease csl4, putative	N/A	8.89627	9.9496	9.06367	9.37509	9.14062	9.26397	8.29339	3.14764	4.92413	10.6934
TGME49_202540	3'5'-cyclic nucleotide phosphodiesterase PDE1	PDE1	11.1502	10.7134	9.99711	9.64713	9.6756	9.59896	10.4515	12.668	12.2232	10.1927
TGME49_272650	3'5'-cyclic nucleotide phosphodiesterase PDE10	PDE10	9.95539	9.07209	7.84294	7.9869	7.90372	7.59828	7.06041	4.25327	7.40149	7.78457
TGME49_224840	3'5'-cyclic nucleotide phosphodiesterase PDE11	PDE11	9.99115	9.86471	10.0114	9.66213	9.61836	9.41532	8.45259	5.71004	7.91299	9.7589
TGME49_310520	3'5'-cyclic nucleotide phosphodiesterase PDE12	PDE12	7.82628	10.1606	9.31605	9.77964	9.78144	9.51378	8.91352	0	0	4.99333
TGME49_257080	3'5'-cyclic nucleotide phosphodiesterase PDE13	PDE13	10.4111	10.0086	9.62299	10.0041	10.1937	9.86508	8.98255	2.44567	4.07808	10.1479
TGME49_233040	3'5'-cyclic nucleotide phosphodiesterase PDE15	PDE15	3.85252	7.14133	7.21946	8.26517	8.90408	9.16979	10.234	10.704	10.8284	10.2417
TGME49_500044	3'5'-cyclic nucleotide phosphodiesterase PDE16	PDE16	4.1772	9.13923	9.44754	10.3418	10.4553	10.8667	11.6395	10.2275	10.5302	10.2137
TGME49_257945	3'5'-cyclic nucleotide phosphodiesterase PDE17	PDE17	9.64335	10.8289	8.98194	9.68936	10.9435	11.2017	13.6081	15.7997	15.0625	12.3454
TGME49_226755	3'5'-cyclic nucleotide phosphodiesterase PDE18	PDE18	8.0795	5.25269	9.49073	9.56846	10.0975	10.3639	10.772	4.07988	4.6599	5.23741
TGME49_293000	3'5'-cyclic nucleotide phosphodiesterase PDE2	PDE2	10.0926	9.51304	9.36134	10.0335	10.7658	10.1611	11.931	7.66407	6.55952	11.5805
TGME49_500342	3'5'-cyclic nucleotide phosphodiesterase PDE3	PDE3	2.41973	2.4009	4.01066	7.46799	8.46463	8.59179	9.72682	2.74491	4.35496	6.92638
TGME49_229405	3'5'-cyclic nucleotide phosphodiesterase PDE4	PDE4	4.4425	8.34224	8.18752	8.80613	9.17986	9.53658	10.4315	9.24466	9.68718	7.33036
TGME49_220420	3'5'-cyclic nucleotide phosphodiesterase PDE5	PDE5	6.10415	8.25412	2.80401	5.41827	5.02564	6.03036	5.50797	9.01798	11.1477	8.68121
TGME49_266920	3'5'-cyclic nucleotide phosphodiesterase PDE6	PDE6	13.0332	13.9715	3.72275	5.00395	5.21111	6.25518	6.7476	10.6964	11.6047	12.7296
TGME49_280410	3'5'-cyclic nucleotide phosphodiesterase PDE7	PDE7	9.96945	9.7561	8.67802	8.54276	8.49733	8.3214	8.01397	3.40023	4.54835	10.9469
TGME49_318675	3'5'-cyclic nucleotide phosphodiesterase PDE8	PDE8	6.14948	8.63414	10.3091	11.0037	11.1057	10.9892	9.74861	7.10384	7.62473	7.14207
TGME49_241880	3'5'-cyclic nucleotide phosphodiesterase PDE9	PDE9	11.2417	10.9572	9.58538	9.84356	10.0796	9.82043	8.92064	2.183	3.55127	4.46245
TGME49_500340	3'5'-cyclic nucleotide phosphodiesterase, putative	N/A	2.21266	1.55914	6.00658	7.381	8.33915	8.64295	9.70778	6.4127	6.8943	3.88163
TGME49_263550	39S ribosomal protein L47, mitochondrial precursor, putative	N/A	9.27425	10.9927	9.08621	8.93862	8.49018	8.70633	7.70059	5.36112	7.85927	11.4319
TGME49_266850	3-demethylubiquinone-9 3-O-methyltransferase	N/A	8.66948	9.55281	10.0042	9.86211	9.35442	9.67962	8.69738	9.64226	10.1213	6.85852
TGME49_232090	3-hydroxyacyl-CoA dehydrogenase, NAD binding domain-containing protein	N/A	9.22153	7.57881	7.93702	8.04387	8.77124	8.04593	9.39267	10.7803	11.7478	9.90675
TGME49_263430	3-hydroxyisobutyrate dehydrogenase	N/A	8.43894	7.83165	8.16448	7.99854	7.82465	7.67606	7.34868	2.35595	3.25462	2.18415
TGME49_217740	3-ketoacyl-(acyl-carrier-protein) reductase	N/A	10.7148	8.06057	9.86703	10.0015	10.1396	9.67381	10.0622	3.16692	0	3.69815
TGME49_271888	3-ketoacyl-CoA reductase, putative	N/A	10.7041	10.6812	10.9603	10.7259	10.6228	10.7572	11.0233	8.64029	9.29615	9.92438
TGME49_304470	3-ketosphinganine reductase, putative	KDHR	8.96714	9.32683	9.59157	9.48748	9.0839	9.60071	9.04089	5.14846	6.10651	2.62859
TGME49_272180	3-oxo-5-alpha-steroid 4-dehydrogenase	N/A	8.14343	7.34513	8.29451	8.48874	8.56665	8.40967	8.52562	10.0482	10.9436	10.4924
TGME49_285240	3-oxo-5-alpha-steroid 4-dehydrogenase	N/A	11.7812	12.073	12.1671	11.8182	11.5794	11.8163	11.7919	4.46646	4.74697	12.7881
TGME49_304480	3-oxo-5-alpha-steroid 4-dehydrogenase	N/A	2.72757	1.82339	5.93851	7.16822	7.658	7.51686	8.6744	6.85724	6.83867	1.69355
TGME49_293590	3-oxoacyl-acyl-carrier protein synthase I/II, putative	N/A	11.6635	10.7443	11.5341	11.2545	11.0041	11.1363	10.9074	5.21258	4.80104	5.99627
TGME49_209430	40S ribosomal protein S4, putative	N/A	8.71324	9.07209	9.95862	9.75013	9.20632	9.41932	8.41559	7.36142	6.67235	8.10199
TGME49_271210	4-alpha-glucanotransferase	N/A	0.399711	1.82339	4.92118	6.51738	7.61396	8.30881	9.22756	4.39804	7.09148	12.1714
TGME49_262430	4-hydroxy-3-methylbut-2-en-1-yl diphosphate synthase	N/A	10.1384	10.1972	9.53229	9.54932	9.30379	9.19159	8.52737	3.54128	6.75481	7.89328
TGME49_227420	4-hydroxy-3-methylbut-2-enyl diphosphate reductase	LYTB	9.38935	8.53007	8.49404	8.26807	8.00298	7.84258	7.51373	5.5761	4.62658	7.16976
TGME49_259130	4-hydroxybenzoate polyprenyl transferase	N/A	6.77759	3.06621	5.35946	7.81041	7.48231	7.41365	6.75558	7.41342	8.00019	2.38278
TGME49_203420	4'-phosphopantetheinyl transferase domain-containing protein	N/A	8.51968	7.90009	6.89422	7.50203	7.76514	7.57246	8.2314	6.94503	6.5617	9.13834
TGME49_214440	4'-phosphopantetheinyl transferase superfamily protein	N/A	11.8575	10.8578	9.74493	9.40058	9.42553	9.6154	9.66165	8.45893	10.0984	11.3948
TGME49_289230	50S ribosomal protein L12, putative	N/A	8.11711	8.62345	9.05096	8.64015	8.63648	8.89976	8.88218	8.10444	8.24037	7.58578
TGME49_225240	50S ribosomal protein L13, putative	N/A	9.58977	10.0968	9.9866	9.97718	9.49671	9.75628	9.48065	8.93481	9.29358	11.2417
TGME49_220150	50S ribosomal protein L16, putative	N/A	8.63667	9.53681	9.11266	8.95732	8.55863	8.93041	8.903	13.0847	13.0416	9.47435
TGME49_217590	50S ribosomal protein L17, putative	N/A	7.6454	7.57877	7.59902	7.66533	7.7181	7.40477	7.28183	10.1102	10.7097	9.66269
TGME49_297170	50S ribosomal protein L17, putative	N/A	8.21005	7.59794	9.41925	8.88379	8.70808	8.95561	8.65665	8.14659	7.97959	5.20863
TGME49_202350	50S ribosomal protein L21, putative	N/A	9.15687	8.44979	9.08419	9.26902	9.1878	9.0593	9.42447	11.6913	12.6257	10.017
TGME49_288610	50S ribosomal protein L21, putative	N/A	7.67801	8.34974	8.74595	8.1639	7.84153	7.89782	7.08834	5.02414	6.30683	9.05786
TGME49_260660	50S ribosomal protein L23, putative	N/A	9.83014	10.1097	9.83838	9.8886	9.77752	9.85581	9.41016	6.72044	6.7421	11.2322
TGME49_239720	50S ribosomal protein l24, putative	N/A	9.3768	9.55695	9.31409	9.53768	9.26118	9.38582	9.11181	11.534	11.7787	11.3913
TGME49_230050	50S ribosomal protein L3, putative	N/A	8.21595	8.37609	8.70354	8.79143	8.67366	8.59249	8.42376	13.0251	13.204	8.92264
TGME49_243480	50S ribosomal protein L3, putative	N/A	8.61306	8.05872	8.91183	9.14728	8.87206	8.8666	8.04525	8.20904	7.77074	8.59171
TGME49_263020	50S ribosomal protein L33, putative	N/A	5.38206	6.82515	5.97289	6.03101	6.02359	6.08524	6.61563	0	0	5.34829
TGME49_308930	50S ribosomal protein L33, putative	N/A	9.12131	9.43454	9.58626	9.36307	9.13111	9.42228	8.90435	5.34198	5.83374	9.99912
TGME49_223660	50S ribosomal protein L4, putative	N/A	9.30659	9.90724	10.0875	9.79464	9.68188	9.45535	9.81495	12.2171	11.8506	10.8326
TGME49_284010	5'-3' exonuclease, N-terminal resolvase family domain-containing protein	N/A	8.08523	6.47405	7.42208	7.56364	7.31934	7.41295	7.08596	0	0.84547	1.76684
TGME49_305780	5'-3' exoribonuclease, putative	N/A	9.09905	8.82634	9.87654	9.74836	9.69655	9.4962	9.57378	10.8976	10.8341	8.88006
TGME49_258690	5-aminolevulinic acid synthase domain-containing protein	N/A	10.3926	9.19511	9.88185	10.0567	10.0796	9.79743	9.58516	2.74018	2.54655	5.90033
TGME49_233905	5'-AMP-activated protein kinase subunit alpha	AMPKalpha	9.39002	8.43527	9.40637	9.29516	9.29407	9.31857	9.24238	9.79112	10.4543	8.99847
TGME49_268960	5'-AMP-activated protein kinase subunit beta	AMPKbeta	9.66911	9.85855	10.0473	9.97041	9.83395	9.83279	9.7211	11.3844	10.7904	11.5641
TGME49_239870	5'-AMP-activated protein kinase subunit gamma	AMPKgamma	9.44972	9.4714	9.39241	9.41932	9.35142	9.16181	9.21024	8.99102	9.16634	10.5377
TGME49_208090	5-formyltetrahydrofolate cyclo-ligase	N/A	7.47326	3.56105	7.12037	7.49077	7.33321	7.46625	7.61376	8.906	8.36003	7.3818
TGME49_216810	5'-nucleotidase, C-terminal domain-containing protein	N/A	11.1626	10.5143	9.08849	9.1182	9.40187	9.35597	10.3202	10.7682	11.2886	8.50726
TGME49_239620	5'-nucleotidase, C-terminal domain-containing protein	N/A	9.15726	9.3895	8.63698	9.14196	9.46207	9.23179	9.02549	11.0878	11.591	10.0074
TGME49_285750	6,7-dihydropteridine reductase	N/A	8.08528	8.87477	8.68241	8.69492	8.65693	8.98588	9.67316	13.7971	13.6538	9.30095
TGME49_312680	60S ribosomal protein L27, putative	N/A	9.50106	8.89446	9.05105	8.92413	8.70471	8.65227	8.8059	7.67253	7.23522	8.28977
TGME49_313560	60S ribosomal protein L7a, putative	N/A	10.3464	9.54037	10.5414	10.5666	10.483	10.3467	9.71701	8.95764	9.4486	10.0689
TGME49_250730	60S ribosomal protein L7-B, putative	N/A	9.51558	9.5751	10.0579	9.92078	9.66551	9.65985	9.08829	8.55741	8.05764	10.7899
TGME49_271280	60S ribosome subunit biogenesis protein NIP7, putative	N/A	8.49653	9.05566	9.4653	9.3932	9.03261	9.22152	8.09959	1.93759	0.446648	7.03274
TGME49_240890	6-phosphofructokinase	PFK1	10.6862	11.1263	11.0931	10.906	10.99	11.0691	11.3211	11.9647	11.2906	11.9854
TGME49_242600	6-phosphogluconate dehydrogenase	N/A	2.06815	0	2.16702	3.56923	2.93197	3.51193	3.96454	13.4016	14.3373	11.2535
TGME49_307850	6-phosphogluconate dehydrogenase	N/A	10.0924	10.7648	10.6377	10.7946	10.8865	11.2562	12.4174	11.4806	12.3133	12.4757
TGME49_305800	6-pyruvoyl tetrahydrobiopterin synthase	N/A	9.23416	8.91529	9.29523	9.14087	8.80914	8.91172	8.28927	6.99892	7.39405	9.59527
TGME49_294880	8-oxoguanine DNA glycosylase, N-terminal domain-containing protein	N/A	8.21129	7.2204	7.56253	7.72231	7.61289	7.57914	7.90512	10.0943	8.97316	9.36862
TGME49_211690	AAA family protein	N/A	9.7006	7.73621	10.6683	10.4777	10.4383	10.1649	10.3376	11.7265	11.178	9.13558
TGME49_314280	AAR2 protein	N/A	7.87524	8.02711	8.6597	8.52673	8.38324	8.54494	8.54447	12.2212	11.7129	9.97011
TGME49_313830	AARP2CN (NUC121) domain-containing protein	N/A	9.75016	9.91064	9.75418	10.0361	9.89443	9.68608	8.98658	7.40788	7.24657	7.79216
TGME49_269000	ABC transporter family protein	N/A	8.37767	7.83896	8.64946	9.02605	9.25005	9.09958	10.1053	12.658	12.9191	9.42447
TGME49_209190	ABC transporter transmembrane region domain-containing protein	N/A	9.52095	9.74955	9.60148	9.47299	9.26478	9.39313	8.54936	4.67668	5.05774	9.82937
TGME49_239020	ABC transporter transmembrane region domain-containing protein	N/A	9.02118	10.2551	10.4002	10.5008	10.5867	10.4639	10.5899	7.46416	9.0967	5.30155
TGME49_263740	ABC transporter transmembrane region domain-containing protein	N/A	7.35691	5.49826	7.7671	8.00375	8.17404	7.76557	7.62361	8.30468	7.98253	8.19829
TGME49_273360	ABC transporter transmembrane region domain-containing protein	N/A	9.69958	9.89601	9.30814	9.41197	9.59041	9.57226	9.85881	2.71049	2.85367	11.2061
TGME49_305590	ABC transporter transmembrane region domain-containing protein	N/A	10.5252	9.24276	8.15161	8.31747	8.66308	8.10159	7.82864	8.20402	8.49986	6.08879
TGME49_316320	ABC transporter transmembrane region domain-containing protein	N/A	2.61375	7.02602	10.7526	10.5363	10.766	11.039	10.7607	12.0235	12.6907	5.88319
TGME49_320460	ABC transporter transmembrane region domain-containing protein	N/A	8.5856	7.18695	7.87602	7.71203	8.02024	7.76121	7.95321	9.54735	9.39412	8.78746
TGME49_226790	ABC transporter, ATP-binding domain-containing protein	N/A	8.67042	7.22416	8.25229	8.09305	8.29689	8.04969	8.23996	8.4085	7.17977	6.8701
TGME49_305770	ABC transporter, ATP-binding domain-containing protein	N/A	8.56707	7.30687	8.13928	8.52259	8.88614	8.82092	10.2353	12.1585	11.4576	9.34312
TGME49_314330	ABC transporter, ATP-binding domain-containing protein	N/A	6.28938	6.98406	7.08478	8.03804	9.24275	9.47169	12.2011	16.0795	16.5279	12.5665
TGME49_208050	ABC transporter, putative	N/A	9.22268	8.40644	8.92037	8.57287	8.8142	8.53584	8.25729	3.52773	3.28825	3.00722
TGME49_202160	ABC1 family protein	N/A	9.24142	8.94336	9.44597	9.4815	9.35903	9.23068	8.8415	8.41034	7.81014	8.94879
TGME49_213620	ABC1 family protein	N/A	7.50412	7.91797	6.25172	6.48305	7.93155	8.37249	11.0402	14.6441	15.3933	9.09826
TGME49_246600	ABC1 family protein	N/A	10.1846	9.87849	7.51878	7.87847	8.2387	8.11315	9.12843	12.9277	12.2512	9.31276
TGME49_259115	ABC1 family protein	N/A	8.82604	7.79653	8.75598	8.58564	8.80102	8.73204	9.36161	12.2458	11.251	8.09019
TGME49_203940	ABC1 protein	N/A	8.10339	7.66091	8.59068	8.66835	8.77615	8.69703	8.01397	4.51458	4.707	8.43755
TGME49_301120	acetyl-CoA acetyltransferase	N/A	9.33965	9.16047	8.58576	8.61088	8.56086	8.71103	9.1359	11.6993	12.0505	11.0621
TGME49_273740	acetyl-CoA acyltransferase B, putative	N/A	3.09083	6.02289	6.85033	7.79158	8.40551	8.9351	10.6777	14.7875	15.3513	12.5132
TGME49_221320	acetyl-CoA carboxylase ACC1	ACC1	11.1659	10.2117	11.1505	11.1454	11.1958	11.0729	10.6959	7.54085	7.35414	9.14571
TGME49_218560	acetyl-coA carboxylase ACC2	ACC2	11.2771	9.87907	10.8507	10.9683	11.4993	11.2995	12.3439	9.81736	9.91039	10.2529
TGME49_266640	acetyl-CoA synthetase ACS	ACS	12.2513	11.3939	10.7894	10.5332	10.2568	10.53	11.2386	9.25457	8.64907	11.2827
TGME49_215940	acetyl-CoA transporter AT1	AT1	9.94334	8.51896	9.73219	9.47388	9.46323	9.37836	9.50661	10.6462	11.4004	5.56009
TGME49_219180	acetyltransferase, GNAT family protein	N/A	8.37064	9.48657	7.19046	7.91667	7.88361	7.95281	6.77928	6.63292	6.68886	6.74345
TGME49_219250	acetyltransferase, GNAT family protein	N/A	10.1949	10.3659	10.1479	9.90845	9.94023	9.90639	9.74949	9.99975	10.7869	12.7242
TGME49_221160	acetyltransferase, GNAT family protein	N/A	7.94033	7.67435	9.97141	10.0753	10.1166	10.1187	9.93396	11.2725	11.0022	10.9949
TGME49_230060	acetyltransferase, GNAT family protein	N/A	9.34253	9.65475	9.51019	9.54586	9.13803	9.55328	9.97899	11.8394	13.0361	7.49241
TGME49_243600	acetyltransferase, GNAT family protein	GNA1	10.8119	12.1923	11.1273	11.4439	11.7569	11.7903	13.0525	15.7022	16.5455	15.5866
TGME49_259070	acetyltransferase, GNAT family protein	N/A	7.34684	8.38178	8.5229	8.32174	7.89687	8.11088	7.53128	7.18033	6.51456	7.45294
TGME49_260010	acetyltransferase, GNAT family protein	N/A	8.55033	9.12884	9.90115	9.81208	9.47754	9.7324	9.53777	9.81096	9.88401	8.99347
TGME49_260550	acetyltransferase, GNAT family protein	N/A	8.18239	9.25689	8.48686	8.48154	8.11286	8.54122	8.77185	6.99115	6.80918	8.77513
TGME49_305450	acetyltransferase, GNAT family protein	NAT8	9.18511	7.43644	9.25674	9.03332	9.48275	9.10864	10.0834	11.7782	11.5793	10.9404
TGME49_228160	acid phosphatase	N/A	1.75143	1.55914	8.62656	9.28634	9.76198	9.52059	8.20066	2.51492	3.99574	3.36547
TGME49_226730	aconitate hydratase ACN/IRP	N/A	11.7326	10.8334	12.3954	12.3428	12.424	12.2367	12.9571	14.4872	13.9969	12.6551
TGME49_251490	ACR, COG2135 domain-containing protein	N/A	9.09152	10.3151	8.54595	8.45226	8.35801	8.46687	8.05135	10.383	9.38756	9.02464
TGME49_205150	ACR, YagE family COG1723 domain-containing protein	N/A	8.52458	8.56898	7.45253	8.09484	8.2531	7.86419	8.34986	10.9972	10.9064	5.22465
TGME49_216275	ACR, YggU family COG1872 domain-containing protein	N/A	6.73864	6.23059	7.66768	7.3932	6.96732	7.35084	6.68835	7.17564	7.4186	8.66494
TGME49_209030	actin ACT1	ACT1	15.0746	15.0322	15.3078	15.6504	15.5637	15.37	15.169	14.1437	14.9332	16.5838
TGME49_220400	actin depolymerizing factor ADF	ADF	13.973	14.155	14.6522	14.7716	14.6685	14.5894	14.4734	13.7609	14.3094	16.1888
TGME49_219280	actin like protein ALP1	ALP1	10.4161	10.5675	10.3622	10.5221	10.6405	10.5009	10.5721	11.9673	11.9865	11.5873
TGME49_258050	actin like protein ALP2a	ALP2A	8.62244	7.70963	8.24345	8.53046	8.60981	8.37206	8.59485	9.09665	8.37173	9.02589
TGME49_234670	actin-like family protein	N/A	8.78511	5.49826	7.54365	6.97351	7.00086	6.87967	6.54367	1.16892	3.79724	4.74117
TGME49_269240	actin-like family protein	N/A	7.82743	7.77625	8.48852	8.37322	8.30385	8.46167	8.90637	10.2615	10.0323	7.54329
TGME49_257710	actin-like protein ALP 5	ALP5	9.08059	8.52541	8.89236	8.96348	8.86273	8.88714	9.15093	7.49649	6.63044	8.28276
TGME49_248890	actin-like protein ALP3b	ALP3B	9.10464	7.09463	9.0925	9.04008	9.1565	8.82582	8.88537	8.22472	6.76338	8.63917
TGME49_221410	actin-like protein ALP4	ALP4	9.96168	9.42915	8.47629	7.9319	8.10665	8.18314	8.51801	9.23423	9.02722	8.65029
TGME49_294850	actin-like protein ALP7	ALP7	3.26175	7.20179	3.31495	6.90182	7.29897	7.64636	8.55079	8.70936	11.1144	7.6115
TGME49_248630	actin-related protein ARP1	ARP1	10.4599	10.6365	9.442	9.51938	9.48042	9.40569	9.45483	8.09161	8.35009	11.0267
TGME49_253040	actin-related protein ARP4A	ARP4A	8.90583	9.25866	9.40918	9.37152	9.35452	9.50023	8.86314	6.92515	6.72428	2.87549
TGME49_223390	activating signal cointegrator 1 complex subunit 3 family 1 ASCC3L1, putative	N/A	10.8274	10.7149	11.0743	11.0385	11.251	11.0174	10.9719	10.1932	9.26552	12.1659
TGME49_249810	activating signal cointegrator 1 complex subunit 3, putative	N/A	8.73963	7.43671	9.34271	9.19597	9.23557	9.17475	9.3957	8.43472	7.31674	9.19379
TGME49_244020	activator of hsp90 atpase 1 family protein	N/A	8.79095	10.1731	10.1422	10.1852	9.62115	10.159	9.464	5.5923	5.58103	4.96211
TGME49_210800	activator of hsp90 ATPase, putative	N/A	8.53994	9.08877	9.65712	9.80294	9.70065	9.62234	9.90251	8.32442	7.51142	9.25044
TGME49_264080	acyl carrier protein ACP	ACP	11.1162	10.3289	12.258	11.9443	11.5502	11.8451	11.4973	6.45835	7.14097	2.9816
TGME49_270310	acyl carrier protein, mitochondrial	mACP	9.06543	10.213	10.1588	9.9777	9.60497	9.99645	9.25704	7.15651	7.52802	11.1641
TGME49_225990	acyl transferase domain-containing protein	N/A	8.75	7.23917	9.97668	9.98715	9.73076	9.87555	9.36798	8.21218	8.09004	4.6973
TGME49_246800	acylaminoacyl-peptidase, putative	N/A	10.5362	9.94941	9.59687	9.47765	9.20575	9.3212	9.16524	11.1386	10.111	7.27607
TGME49_249970	acylated pleckstrin-homology domain-containing protein APH	APH	10.5957	11.7774	10.0095	10.5259	10.5974	10.5069	9.20824	10.0059	10.3273	13.9065
TGME49_251550	acyl-CoA binding protein ACBP1	N/A	7.83332	9.63303	11.0171	10.8769	10.8053	11.0996	11.672	14.1026	14.6307	11.5934
TGME49_234510	acyl-CoA binding protein ACBP2	ACBP2	9.59205	11.2482	9.89405	9.77776	9.42208	9.81247	9.6796	13.3886	13.7105	10.8024
TGME49_269680	acyl-CoA carboxyltransferase beta chain, putative	N/A	0	1.55914	0	0.431376	0.978136	2.64767	2.04651	7.4101	11.2931	8.04361
TGME49_231900	acyl-CoA dehydrogenase domain-containing protein	N/A	2.51371	2.65039	6.74936	7.46769	8.02966	8.8339	10.5587	15.2606	15.5701	12.7412
TGME49_247500	acyl-CoA dehydrogenase, middle domain-containing protein	N/A	4.09987	2.77885	8.45524	9.26072	10.0213	10.6309	12.6386	15.6481	15.0543	14.1561
TGME49_315480	acyl-CoA dehydrogenase, middle domain-containing protein	N/A	3.59177	7.45262	6.81275	7.56512	8.50454	9.37265	11.5818	15.9425	16.3365	13.8873
TGME49_297220	acyl-CoA synthetase ACS1	ACS1	8.16294	9.3954	8.89704	8.95881	9.6663	9.63029	11.5161	8.67007	8.07721	10.4478
TGME49_310150	acyl-CoA synthetase ACS2, putative	ACS2	11.1471	10.7969	10.9594	11.1533	11.4252	11.1614	12.1792	10.0069	10.2058	12.9071
TGME49_310080	acyl-CoA synthetase ACS3, putative	ACS3	10.1759	9.4525	10.3307	10.3352	10.2855	10.0304	10.7288	13.749	13.9232	11.2239
TGME49_243800	acyl-CoA synthetase ACS4, putative	ACS4	10.9902	9.49377	11.5131	11.3172	11.0395	11.1389	10.7493	4.35529	4.16995	11.1995
TGME49_247760	acyl-CoA synthetase ACS5, putative	ACS5	11.2628	11.3677	10.6257	10.6684	10.5505	10.6676	11.667	15.3334	16.0106	12.0161
TGME49_232580	acyl-CoA synthetase ACS6, putative	ACS6	4.64602	6.34318	7.02243	8.06202	9.12795	9.62483	11.6573	15.5958	15.9761	11.1591
TGME49_276155	acyl-CoA synthetase ACS7, putative	ACS7	7.00133	7.64792	8.62514	8.62085	9.07691	9.20157	9.76267	9.99935	9.63123	4.756
TGME49_263710	acyl-CoA:cholesterol acyltransferase alpha ACAT1-alpha	ACAT1A	9.35139	9.13152	8.2473	8.4279	8.1876	8.24076	8.15799	6.28812	6.16015	5.79228
TGME49_232730	acyl-CoA:diacylglycerol acyltransferase 1-related enzyme	N/A	9.97496	10.32	10.8438	10.5655	10.2816	10.5778	10.9691	13.9387	14.7642	10.2484
TGME49_240860	acyl-glycerol-3-phosphate acyltransferase AGPAT	AGPAT	9.91958	9.84412	9.76319	9.49383	9.44564	9.56417	10.1659	13.9123	14.7861	11.7449
TGME49_258940	acylphosphatase family protein	N/A	7.77537	9.22504	8.38177	8.55353	8.02995	8.0681	7.78542	1.08112	0	9.15579
TGME49_297640	acyltransferase ATS2	ATS2	8.10022	7.62518	9.44118	9.14	9.08265	8.9686	9.85905	13.2857	13.1625	8.57431
TGME49_223910	acyltransferase domain-containing protein	N/A	10.1411	10.1506	10.1267	10.0053	9.67224	10.0084	9.45345	6.26134	6.33725	9.84912
TGME49_217050	ADA2-A transcriptional co-activator SAGA component	N/A	9.94462	9.80804	9.40621	9.62305	9.74438	9.33535	9.34484	9.03531	8.08244	10.1755
TGME49_263330	Adaptin ear-binding coat-associated protein 2 (NECAP-2) isoform 2 family protein	N/A	8.78047	9.54557	8.54951	8.43137	8.25983	8.4007	8.19919	7.6617	7.13027	9.86974
TGME49_500306	adaptor complexes medium subunit family protein	N/A	10.711	10.1598	10.4299	10.653	10.71	10.565	11.2841	10.701	10.0421	10.38
TGME49_215130	adaptor-related protein complex 3, sigma 2 subunit	N/A	9.59339	10.5825	9.85586	9.69665	9.30531	9.74464	9.91738	11.4506	10.8714	9.97783
TGME49_249900	adenine nucleotide translocator	ANT	12.6309	12.516	14.2221	14.1591	13.4488	13.8265	13.0796	6.89595	7.46854	5.29753
TGME49_254580	adenine nucleotide transporter ANT	ANT	10.15	9.58885	10.5444	10.5715	10.3486	10.7087	11.1959	14.4369	14.3083	8.46416
TGME49_250880	adenosine kinase	N/A	10.572	10.3041	11.4455	11.9557	11.4358	11.3375	10.7342	9.39302	10.3005	7.88892
TGME49_244440	adenosine transporter AT1	AT1	10.9318	9.14599	13.4666	13.5972	12.964	12.2509	12.2864	2.50152	3.86588	8.01211
TGME49_205720	Adenosine/AMP deaminase domain-containing protein	N/A	7.91261	9.04324	8.98187	8.62664	8.15401	8.68644	8.04362	9.30332	9.67528	6.80472
TGME49_215480	Adenosine/AMP deaminase domain-containing protein	N/A	8.97757	9.15432	8.47842	8.44762	8.59389	8.74012	9.23846	9.62591	10.1363	5.43409
TGME49_225050	adenosylhomocysteinase, putative	N/A	11.443	10.0892	11.4918	11.6742	11.5854	11.267	11.241	12.5213	12.6288	7.09553
TGME49_289170	adenylate cyclase alpha 1	N/A	2.66041	6.38968	3.6868	6.77709	7.76661	7.41075	9.14695	7.8811	8.59116	4.01019
TGME49_216280	adenylate cyclase alpha 2	N/A	4.89515	7.52244	6.6113	8.16347	8.48289	8.92947	9.73264	5.43397	5.24608	4.08869
TGME49_230555	adenylate cyclase alpha 3	N/A	2.9189	2.77885	7.42581	8.6525	9.01672	9.56058	10.2318	7.7173	7.97284	7.68867
TGME49_270865	adenylate cyclase beta	N/A	10.8133	10.3278	7.94415	8.31352	8.76763	8.43447	8.60952	9.70648	10.5089	12.2669
TGME49_288320	adenylate kinase	N/A	6.65418	8.6306	8.05811	7.90962	7.53562	7.88489	7.46464	11.1674	11.7501	9.18094
TGME49_307603	adenylate kinase	N/A	0.227194	0	4.59051	6.89503	7.88475	8.26814	9.35965	11.9388	11.932	6.60716
TGME49_258640	adenylate kinase superfamily protein	N/A	7.12446	6.83853	7.58943	7.26927	6.89928	7.06719	6.67472	4.2924	2.47504	7.54996
TGME49_281970	adenylate kinase superfamily protein	N/A	2.00371	1.13777	5.19147	6.16137	6.97371	7.87393	9.08453	3.90752	3.96637	3.39509
TGME49_224900	adenylate kinase, putative	N/A	11.4116	12.2273	12.3702	12.2831	11.9288	12.1107	11.6585	5.19259	5.02606	11.9165
TGME49_263190	adenylosuccinate lyase, putative	N/A	8.34835	7.75397	9.24345	9.53987	9.5067	9.30425	9.49235	7.62012	7.04808	10.0187
TGME49_277760	adenylosuccinate lyase, putative	N/A	10.0756	9.70071	10.2607	10.394	10.3006	10.3147	10.9166	14.1045	14.2873	11.8585
TGME49_279450	adenylosuccinate synthetase, putative	N/A	7.29485	10.1692	12.1439	11.7417	11.2742	11.6078	10.5684	6.62634	7.55946	6.41753
TGME49_276140	ADP ribosylation factor ARF1	ARF1	12.5326	11.3953	12.7815	12.7805	12.6727	12.5957	12.9612	7.81651	7.48217	11.5512
TGME49_237700	ADP/ATP carrier protein, putative	N/A	0	0	0.53667	0.431376	0	0.893547	0.291187	0.425737	3.11069	2.27522
TGME49_300360	ADP/ATP translocase	N/A	7.50947	7.40473	6.7804	8.23706	8.65848	8.85178	10.4432	13.8763	14.0924	8.27266
TGME49_262860	ADP-ribosylation factor family protein 1, putative	N/A	8.57901	9.66592	9.63611	9.35591	9.1771	9.48649	9.20951	6.66034	5.85877	6.84289
TGME49_212950	ADP-ribosylation factor family protein 2, putative	N/A	9.59753	10.0064	10.0121	9.72496	9.40277	9.6191	9.57603	10.3232	10.6974	6.35921
TGME49_269780	ADP-ribosylation factor-like protein ArlX1	ARLX1	8.07898	8.48896	6.45236	5.72176	6.10805	6.10409	7.30718	11.0963	11.7777	7.36219
TGME49_291800	ADP-ribosylation factor-like protein ArlX2	ARLX2	9.88339	8.81026	9.01752	8.8966	8.75307	8.81359	8.38374	11.4683	12.4803	9.8901
TGME49_288260	ADP-ribosylation factor-like protein ArlX3	ARLX3	9.99578	10.3136	8.73888	8.55298	8.59286	8.74581	9.64938	14.0046	14.1338	11.5152
TGME49_240670	adrenodoxin-type ferredoxin, putative	N/A	8.48387	8.89811	8.39317	9.11874	8.61256	8.8517	7.94669	7.0762	7.39227	10.5849
TGME49_205550	AGC kinase	N/A	8.34489	7.8857	7.82531	8.42374	8.53173	8.31298	8.01771	7.54977	7.70902	8.73243
TGME49_267540	AGC kinase	N/A	7.77593	7.71795	9.07176	9.70422	9.84235	9.18338	8.56506	9.43271	9.79355	8.72791
TGME49_272200	AGC kinase	N/A	4.93181	8.74358	8.23965	9.73192	10.5004	11.2767	13.5651	13.8591	13.2699	9.266
TGME49_240960	AIG2 family protein	N/A	9.90247	9.29592	8.70858	9.47333	9.90084	9.79884	11.7181	15.6201	16.2605	12.4013
TGME49_315260	alanine dehydrogenase	N/A	2.74439	2.49398	8.76191	8.98387	9.36373	9.62046	11.0635	14.3414	14.177	14.7498
TGME49_203500	alanine dehydrogenase/pyridine nucleotide transhydrogenase domain-containing protein	N/A	3.83203	3.02558	14.3133	14.5657	15.1423	15.3222	16.8385	9.06357	10.0134	7.61421
TGME49_500261	alanine--glyoxylate aminotransferase	N/A	10.0977	9.75283	11.773	11.437	11.0108	11.3064	10.9733	9.97647	10.1364	5.06795
TGME49_221380	alba 1	N/A	13.1589	13.0008	14.4415	14.2358	14.1141	14.2824	14.2773	9.80631	9.21784	12.5219
TGME49_218820	alba 2	N/A	12.1711	12.4446	13.0258	13.0154	12.8808	12.8654	13.0349	8.07715	8.22626	13.1295
TGME49_222160	aldehyde dehydrogenase	N/A	10.9713	12.3358	11.6335	11.4757	11.6112	11.8933	13.2713	17.0074	16.2707	11.1894
TGME49_264000	aldehyde dehydrogenase	N/A	10.2179	11.3361	10.5194	10.5476	10.8316	11.0263	12.5229	11.2036	10.4217	11.9324
TGME49_288450	aldehyde dehydrogenase (NAD) family protein	N/A	7.82225	8.15457	0.783977	0.934297	2.88483	3.00696	2.70412	5.74352	8.11977	10.6533
TGME49_281620	aldo/keto reductase family oxidoreductase	N/A	9.66578	9.02293	10.0031	9.537	9.7924	9.75834	10.36	14.0085	14.7052	11.6883
TGME49_208040	aldo-keto reductase	N/A	8.84927	8.41552	7.96181	7.84033	8.06422	7.69147	7.36834	2.00944	4.48793	6.92522
TGME49_273920	aldose reductase, putative	N/A	10.3145	10.4551	9.63844	9.52532	9.65188	9.77846	10.1506	12.0522	12.271	8.35537
TGME49_262030	ALG6, ALG8 glycosyltransferase family protein	N/A	7.75356	3.70486	7.62512	8.30276	8.24523	8.30246	8.11014	3.8722	4.27347	5.91349
TGME49_314730	ALG6, ALG8 glycosyltransferase family protein	N/A	9.19297	9.82876	8.91073	8.84509	8.73676	8.92858	8.93126	9.90195	10.2642	8.24479
TGME49_286630	alkyl hydroperoxide reductase AHP1	AHP1	11.9883	12.6774	11.493	11.2451	10.7733	11.0587	10.1364	2.91095	3.38034	6.43343
TGME49_246690	alpha amylase, catalytic domain-containing protein	N/A	8.58434	7.99551	10.1745	10.2072	10.7514	10.7371	12.0251	10.5009	10.1955	4.92365
TGME49_201720	alpha N-terminal protein methyltransferase NTM1	N/A	8.09868	7.90859	9.22943	9.19543	8.76026	8.99337	8.01397	6.75688	6.35205	7.1808
TGME49_316400	alpha tubulin TUBA1	TUBA1	15.0735	14.273	14.647	14.8057	14.7367	14.8421	15.1635	16.4075	16.9428	11.8619
TGME49_238200	alpha/beta hydrolase fold domain-containing protein	N/A	7.33447	10.6389	6.40883	7.19353	7.9458	8.55132	10.5534	14.0533	13.9215	9.65653
TGME49_250360	alpha/beta hydrolase fold domain-containing protein	N/A	7.02003	9.35514	9.46815	9.59508	9.78631	9.66197	10.0409	8.02479	8.63057	7.3473
TGME49_309890	alpha/beta hydrolase, putative	N/A	8.53536	8.57501	8.80017	8.49678	8.63602	8.67769	8.4297	11.0236	11.5463	8.98676
TGME49_266310	Alpha-1,3-mannosyl-glycoprotein 2-beta-N-acetylglucosaminyltransferase	N/A	8.72105	8.34107	9.03309	8.71516	8.62894	8.70388	8.99441	11.9611	11.7244	6.92074
TGME49_283490	Alpha-amylase AMY3, putative	N/A	0.297242	0	6.4045	7.13528	8.45976	9.4113	10.5633	12.6268	14.261	5.90481
TGME49_254880	Alpha-galactosidase	N/A	11.9084	11.3841	9.29776	9.51285	9.23427	9.18744	8.27892	2.30221	7.11425	7.23799
TGME49_214260	alpha-glucan water dikinase 1, putative	N/A	10.4301	10.4128	8.92885	9.36576	9.90697	9.83673	10.8764	13.1766	12.5037	10.4757
TGME49_218760	alpha-soluble NSF attachment protein	alphaSNAP	10.3165	9.81133	10.1103	9.8465	9.7842	9.94125	9.87586	9.53043	9.33866	10.5455
TGME49_231770	alpha-tubulin I, putative	N/A	0.83607	0	6.65549	8.30409	9.21067	9.86553	11.9369	15.6524	15.2636	9.66639
TGME49_319600	alpha-tubulin N-acetyltransferase, putative	N/A	7.75793	7.5089	3.70173	6.44638	6.94617	6.9244	8.14779	4.40331	4.53233	5.2571
TGME49_267450	alpha-tubulin suppressor protein	N/A	9.91237	9.1242	8.82055	8.68925	8.62105	8.54209	7.63987	5.49576	6.63536	12.1467
TGME49_210980	alternative splicing type 3 and, putative	N/A	9.93273	10.1384	10.852	10.5911	10.489	10.6519	10.1996	9.88658	10.1899	10.228
TGME49_231640	alveolin domain containing intermediate filament IMC1	ALV1	14.0557	11.7736	11.0037	12.2528	12.5613	11.9053	11.2343	2.63907	7.99771	10.5335
TGME49_230210	alveolin domain containing intermediate filament IMC10	ALV12	13.4612	11.8854	10.9854	11.6757	11.7588	11.3495	10.4536	11.5852	12.4426	11.8764
TGME49_239770	alveolin domain containing intermediate filament IMC11	ALV7	10.6094	10.9858	4.79242	2.87568	2.70167	3.94499	3.68406	7.45409	9.96016	12.7643
TGME49_248700	alveolin domain containing intermediate filament IMC12	IMC12	12.8386	11.8586	13.3199	13.4334	13.1541	12.926	12.7617	7.8106	7.32899	12.8347
TGME49_253470	alveolin domain containing intermediate filament IMC13	ALV8	10.5095	11.7271	10.0277	9.93814	9.84934	10.1105	9.82625	13.3588	13.0797	12.6901
TGME49_260540	alveolin domain containing intermediate filament IMC14	ALV9	11.2186	10.3503	8.59101	9.46229	9.67292	9.3161	8.48717	10.8334	11.8027	13.2513
TGME49_275670	alveolin domain containing intermediate filament IMC15	ALV5	11.5711	11.183	7.70971	7.98896	7.9911	7.71028	6.82173	4.22827	5.94033	8.43816
TGME49_216000	alveolin domain containing intermediate filament IMC3	ALV3	12.9315	10.3817	10.079	11.1907	11.553	10.56	10.297	4.69268	7.76984	10.4661
TGME49_231630	alveolin domain containing intermediate filament IMC4	ALV4	13.7696	11.9377	11.324	12.2703	12.2834	11.8628	11.0669	3.38063	4.45302	9.23638
TGME49_224530	alveolin domain containing intermediate filament IMC5	ALV11	10.833	9.09362	7.3156	7.8497	8.1395	7.81504	6.95339	3.34089	4.44344	9.64434
TGME49_220270	alveolin domain containing intermediate filament IMC6	IMC6	12.2608	10.7926	9.86731	10.8077	10.9534	10.4751	9.62207	4.57656	8.03823	8.3356
TGME49_222220	alveolin domain containing intermediate filament IMC7	IMC7	13.3475	12.1092	13.5594	13.7299	13.7072	13.1631	13.4829	7.25306	6.57355	5.1765
TGME49_224520	alveolin domain containing intermediate filament IMC8	ALV10	10.8817	10.0125	6.82474	7.66192	7.65372	7.39414	6.42852	1.96664	4.42864	11.992
TGME49_226220	alveolin domain containing intermediate filament IMC9	ALV6	10.033	8.15301	8.46417	9.02311	9.18904	9.2554	10.8351	13.699	12.8922	8.47549
TGME49_226060	amino acid transporter AAT1	AAT1	10.0664	9.96106	8.22912	7.9155	8.07436	7.89559	8.34259	9.77367	9.64839	10.3783
TGME49_227430	amino acid transporter AAT2	AAT2	9.8523	10.9317	4.01515	4.91481	5.1876	6.28582	8.09959	11.0444	11.6633	6.50181
TGME49_227570	amino acid transporter AAT3	AAT3	10.3467	11.4572	8.86242	9.32144	10.016	10.5771	12.6049	17.2079	18.1236	14.0372
TGME49_227580	amino acid transporter AAT4	AAT4	11.434	11.8676	8.23733	8.8337	9.37566	9.7577	11.6468	15.0446	16.2149	12.5399
TGME49_309910	amino acid transporter, putative	N/A	9.59982	7.51331	8.95477	8.97334	9.09741	9.12749	9.66258	8.03763	7.50914	9.96611
TGME49_221310	aminopeptidase N1	APN1	8.97614	9.76789	8.16047	9.00281	9.59455	10.3342	12.5166	13.752	14.1837	12.0418
TGME49_224350	aminopeptidase N2	APN2	11.6949	10.8932	12.3897	12.2365	12.3745	12.4231	13.2158	14.7153	14.1214	11.3729
TGME49_224460	aminopeptidase N3	APN3	14.191	12.1813	6.54556	5.44278	6.23346	6.2045	8.29886	8.20173	8.94597	8.30005
TGME49_261600	aminopeptidase P	APP	9.92497	10.5847	10.5708	10.4313	10.1402	10.1659	10.6259	11.5901	11.279	10.7064
TGME49_500361	aminopeptidase, putative	N/A	6.72959	3.40632	6.60361	7.37571	8.25575	8.29769	10.5128	12.593	12.8765	7.29343
TGME49_310680	aminotransferase, class I/II superfamily protein	N/A	5.53748	8.07663	7.43304	8.27983	8.63216	9.27377	11.5849	16.311	16.9183	10.594
TGME49_328400	aminotransferase, class V family protein	N/A	3.50784	0	0	1.98103	3.16191	1.9598	4.53702	5.50525	4.72811	0.771441
TGME49_211090	aminotransferase, class V superfamily protein	N/A	9.65594	9.75098	9.38912	9.63705	9.66994	9.8525	10.5895	14.7106	14.2315	13.1214
TGME49_300120	aminotransferase, class V superfamily protein	N/A	11.0943	10.8266	9.47066	9.32227	9.537	9.21209	9.56073	8.89908	9.1236	5.48884
TGME49_234440	aminotransferase, putative	N/A	9.19433	10.5811	10.1347	10.503	10.9054	11.0353	12.0209	9.47392	9.44018	6.38953
TGME49_264030	aminotransferase, putative	N/A	10.3335	10.7915	8.95685	9.32849	9.82616	10.7192	12.7602	14.5935	14.9706	12.8644
TGME49_281500	aminotransferase, putative	N/A	6.91089	7.05298	3.84862	5.68891	6.07616	5.8445	7.00119	6.28817	3.38027	7.12689
TGME49_225413	AMMECR1 domain-containing protein	N/A	6.10863	4.0484	3.77833	6.00261	6.26125	6.596	6.94032	5.08589	5.02187	9.98921
TGME49_242000	AMMECR1 domain-containing protein	N/A	11.4176	11.4269	9.58121	9.20328	9.26691	9.59953	9.94393	10.0767	10.4604	11.6546
TGME49_234280	AMP deaminase	N/A	9.14553	9.59285	9.48608	9.76978	9.81099	9.85073	9.77904	8.89512	8.82484	9.12657
TGME49_260830	AMP-activated protein kinase, putative	N/A	4.91253	7.69622	9.12024	9.74819	10.4269	10.5602	12.1354	15.7021	16.2062	10.1051
TGME49_219230	AMP-binding enzyme domain-containing protein	N/A	9.7745	10.7603	5.55964	7.0763	7.92026	8.789	10.9335	15.5792	15.5813	12.6113
TGME49_226910	Amylo-alpha-1,6-glucosidase	N/A	9.53307	9.45865	10.1324	9.99601	10.3545	10.2609	10.8773	12.7384	11.9133	10.744
TGME49_205460	AN1 family Zinc finger domain-containing protein	N/A	9.36172	9.09472	9.12455	9.03722	8.83128	8.97388	9.0417	12.0675	12.679	10.1998
TGME49_221910	AN1 family Zinc finger domain-containing protein	N/A	12.1358	11.9451	10.8331	10.9722	11.1743	11.4921	12.88	16.9718	17.6415	13.7177
TGME49_267520	anaphase promoting complex subunit 11, putative	N/A	6.48949	5.64721	3.89108	5.75707	5.22865	5.55579	5.87347	4.71512	4.91662	5.78457
TGME49_500124	anaphase-promoting complex subunit 1	APC1	8.38211	9.51436	7.88175	8.1962	8.27643	8.54661	8.65878	7.08657	6.93501	6.02813
TGME49_203440	anaphase-promoting complex subunit APC10	APC10	7.60916	6.57035	8.35744	8.09136	8.16125	7.80812	7.58099	7.60478	6.26777	5.04448
TGME49_214500	ankyrin repeat-containing protein	N/A	8.98418	8.59407	9.27502	9.1149	8.97182	9.0584	8.76717	8.82621	8.64925	9.92432
TGME49_219210	ankyrin repeat-containing protein	N/A	8.59894	9.66328	9.69309	9.60851	9.25217	9.5733	8.45658	3.16171	0	10.4771
TGME49_236595	ankyrin repeat-containing protein	N/A	0	0	2.78546	5.52154	6.59588	6.95476	8.13751	10.4781	10.69	5.26596
TGME49_244060	ankyrin repeat-containing protein	N/A	9.83798	10.3978	9.16999	9.0383	9.3956	9.07758	9.76638	13.6722	14.316	11.435
TGME49_254510	ankyrin repeat-containing protein	N/A	7.81129	8.21648	8.21439	8.84932	8.8235	8.5042	8.07028	2.05444	1.05935	4.42174
TGME49_254660	ankyrin repeat-containing protein	N/A	9.89633	11.5219	9.96438	10.0036	9.84957	10.1021	10.2688	11.8675	11.2705	9.16294
TGME49_255510	ankyrin repeat-containing protein	N/A	10.6549	8.8352	10.0715	10.0563	10.135	9.9025	10.4085	9.50144	8.66846	9.20573
TGME49_261230	ankyrin repeat-containing protein	N/A	12.4484	11.8395	11.4404	11.1606	11.4032	11.3668	11.7226	14.8042	15.2628	12.2513
TGME49_261710	ankyrin repeat-containing protein	N/A	9.77106	10.9227	9.73536	9.77149	9.63912	9.66933	8.98786	11.5477	12.1551	11.1705
TGME49_265150	ankyrin repeat-containing protein	N/A	8.60229	8.46603	9.22267	9.6019	9.11834	9.26804	8.49911	8.34585	8.23803	7.02225
TGME49_288550	ankyrin repeat-containing protein	N/A	8.92669	10.5169	7.44329	7.85532	7.9095	8.34867	9.67789	14.2384	14.4845	11.5295
TGME49_305580	ankyrin repeat-containing protein	N/A	2.67538	6.55969	4.94624	6.17628	6.64561	7.13945	7.95711	9.49568	9.82471	8.53711
TGME49_320650	ankyrin repeat-containing protein	N/A	8.3161	5.86364	7.2402	7.14557	7.22414	7.23471	6.64171	4.34285	3.34622	7.01401
TGME49_500129	ankyrin repeat-containing protein	N/A	0	0	5.08369	6.42011	7.19421	7.83763	8.99082	9.83556	9.65262	4.39962
TGME49_500175	ankyrin repeat-containing protein	N/A	0	0	5.2451	5.22566	6.20133	7.09877	7.99006	8.46768	8.78051	2.78093
TGME49_500355	ankyrin repeat-containing protein	N/A	5.00896	8.37776	6.64192	7.42525	8.33594	8.80988	9.85533	8.52704	8.73916	8.56751
TGME49_261590	ankyrin, putative	N/A	8.69072	9.6893	9.59146	9.0849	9.04489	9.43273	9.66139	9.75876	10.2977	8.99266
TGME49_254200	anticodon binding domain-containing protein	N/A	8.73917	9.08522	8.59014	8.4639	8.42327	8.37903	8.01231	5.22835	5.79964	8.21334
TGME49_209140	anti-silencing protein, ASF1 family protein	N/A	10.0067	8.64358	10.1461	9.84446	9.555	9.56109	9.30391	5.38309	5.20608	5.14861
TGME49_313670	AP-1 complex subunit gamma, putative	N/A	10.8073	10.0803	10.6314	10.6558	10.5578	10.5491	11.1844	12.9501	13.223	11.686
TGME49_289770	AP-1 complex subunit mu-1, putative	N/A	10.7723	11.0583	10.6254	10.4988	10.263	10.5207	10.2717	12.1354	12.8521	11.1719
TGME49_270370	AP-1 complex subunit sigma, putative	N/A	10.4476	9.8235	9.92102	9.92269	9.73453	9.8064	9.84753	10.0224	9.99515	6.80524
TGME49_221940	AP-2 complex subunit alpha	AP-2alpha	9.0272	8.68355	9.12593	8.9281	9.11919	9.00851	9.33322	10.5071	10.7193	10.46
TGME49_230920	AP-2 complex subunit mu	AP-2mu	9.0683	8.68798	8.93412	8.89956	8.97914	8.85282	9.38673	12.929	13.2483	10.2265
TGME49_313450	AP-2 complex subunit sigma-1, putative	N/A	8.01412	7.41909	8.08177	7.68349	7.70675	8.0081	8.16849	9.31165	9.53699	7.93014
TGME49_208020	AP2 domain transcription factor AP2Ib-1	AP2IB1	5.34109	3.35525	9.4369	10.1536	10.3619	9.64568	9.17792	4.28079	3.28825	4.43668
TGME49_252370	AP2 domain transcription factor AP2III-1	AP2III1	1.32492	0	5.62745	7.03654	7.94557	7.66122	9.31628	7.09148	7.60475	3.21804
TGME49_253380	AP2 domain transcription factor AP2III-2	AP2III2	10.9529	9.90727	7.76125	8.16501	8.84053	8.773	9.76946	13.4056	13.6798	8.67709
TGME49_299150	AP2 domain transcription factor AP2III-3	AP2III3	1.04596	5.59448	7.97173	7.96213	8.88241	8.95224	11.7426	15.8394	16.3312	9.56282
TGME49_299020	AP2 domain transcription factor AP2III-4	AP2III4	4.37529	2.57642	9.60999	9.73186	10.1419	10.1304	10.9018	10.3603	10.7407	6.38841
TGME49_320700	AP2 domain transcription factor AP2IV-1	AP2IV1	8.25232	8.3459	8.73884	8.78104	8.55157	8.52142	8.22242	9.02939	8.28975	8.12075
TGME49_320680	AP2 domain transcription factor AP2IV-2	AP2IV2	5.3798	7.31185	8.79491	9.59717	10.1216	9.36967	8.57496	7.45147	7.26983	5.3591
TGME49_318610	AP2 domain transcription factor AP2IV-3	AP2IV3	5.69393	7.94573	10.6573	10.7437	10.8011	10.5395	9.46521	0	3.6264	7.07704
TGME49_318470	AP2 domain transcription factor AP2IV-4	AP2IV4	10.0541	9.12486	8.91723	9.3587	9.60089	9.0969	8.7684	3.49071	5.82515	6.2052
TGME49_211720	AP2 domain transcription factor AP2IV-5	AP2IV5	11.5721	8.22656	8.95544	9.65771	10.5182	10.5495	12.0432	11.9827	13.1015	11.5475
TGME49_267460	AP2 domain transcription factor AP2IX-1	AP2IX1	6.34083	8.20121	10.3284	10.0406	9.45686	9.63212	8.48026	6.2679	6.25856	3.2692
TGME49_264485	AP2 domain transcription factor AP2IX-3	AP2IX3	5.79107	3.87791	7.7176	8.23294	9.07983	9.59421	10.606	4.83404	5.15053	6.46438
TGME49_288950	AP2 domain transcription factor AP2IX-4	AP2IX4	9.57815	10.5983	7.69946	7.65873	7.46644	7.68749	6.65672	10.2109	11.1899	10.7499
TGME49_289710	AP2 domain transcription factor AP2IX-5	AP2IX5	11.0423	8.38701	8.90618	9.07633	9.54194	9.39748	11.5328	15.2425	15.4554	8.67363
TGME49_290180	AP2 domain transcription factor AP2IX-6	AP2IX6	7.49702	7.94775	8.4692	8.38581	8.36339	8.09793	8.16175	9.54674	8.70627	8.07855
TGME49_290630	AP2 domain transcription factor AP2IX-7	AP2IX7	8.34196	7.84058	7.63965	8.18998	8.14945	7.7186	7.67503	8.94599	8.02845	5.65711
TGME49_306000	AP2 domain transcription factor AP2IX-8	AP2IX8	11.3011	10.3861	10.383	10.1942	10.36	10.2485	10.7595	10.7912	10.42	10.6125
TGME49_306620	AP2 domain transcription factor AP2IX-9	AP2IX9	8.91463	12.865	10.4617	10.1687	10.2874	10.1655	10.1754	3.62129	4.28903	3.24735
TGME49_220530	AP2 domain transcription factor AP2V-1	AP2V1	8.51698	8.30733	3.06731	4.58101	4.85527	4.7026	3.99858	7.94822	8.48696	10.2357
TGME49_285895	AP2 domain transcription factor AP2V-2	AP2V2	9.67087	8.32154	9.05359	8.76923	8.90119	9.34663	9.81817	12.9504	13.3094	7.88856
TGME49_240460	AP2 domain transcription factor AP2VI-1	AP2VI1	10.0083	10.5558	8.69073	8.68083	8.40461	8.42103	7.37872	6.63186	7.30394	6.78501
TGME49_240900	AP2 domain transcription factor AP2VI-2	AP2VI2	10.1041	9.63317	9.85423	9.87678	10.1034	10.1229	10.4648	9.64214	10.0614	6.46612
TGME49_244510	AP2 domain transcription factor AP2VI-3	AP2VI3	8.30266	8.26519	11.0108	10.625	10.5575	10.7995	10.7131	3.35439	4.6088	4.05135
TGME49_280470	AP2 domain transcription factor AP2VIIa-1	AP2VIIA1	8.30078	10.4494	8.99573	9.44551	9.80571	9.38028	8.36266	5.45825	5.88564	3.95674
TGME49_280460	AP2 domain transcription factor AP2VIIa-2	AP2VIIA2	12.2539	13.3632	9.27585	8.56675	8.3514	8.46701	7.5149	3.35284	4.30575	9.34281
TGME49_205650	AP2 domain transcription factor AP2VIIa-3	AP2VIIA3	12.2277	11.7478	9.08695	9.31342	9.01443	9.13225	8.2271	3.52451	8.51083	7.92003
TGME49_203710	AP2 domain transcription factor AP2VIIa-4	AP2VIIA4	11.1835	10.4494	11.3203	10.732	10.5498	10.7681	10.178	3.02954	3.86238	5.26264
TGME49_203690	AP2 domain transcription factor AP2VIIa-5	AP2VIIA5	10.2366	9.5547	9.68661	9.66384	9.88029	9.92658	11.2783	13.3985	14.3817	10.8971
TGME49_203050	AP2 domain transcription factor AP2VIIa-6	AP2VIIA6	9.62001	10.6856	8.23006	8.43832	8.31673	8.04421	6.90216	7.61558	9.26771	8.80092
TGME49_202490	AP2 domain transcription factor AP2VIIa-7	AP2VIIA7	10.8605	10.0223	9.07942	8.98421	9.21554	9.24945	10.3709	13.5743	13.3118	9.13067
TGME49_282210	AP2 domain transcription factor AP2VIIa-8	AP2VIIA8	10.1027	10.3567	7.46293	8.28439	8.61785	6.61203	5.78457	9.73888	10.2353	9.11445
TGME49_282220	AP2 domain transcription factor AP2VIIa-9	AP2VIIA9	9.14697	10.1445	10.0159	9.92278	9.82068	9.9745	10.0494	12.2282	13.0648	10.7467
TGME49_262420	AP2 domain transcription factor AP2VIIb-1/ADA2-B	APVIIB1	9.66313	8.96485	8.41643	8.8413	9.49718	9.08306	10.4191	10.6641	10.1841	6.14549
TGME49_262000	AP2 domain transcription factor AP2VIIb-2	AP2VIIB2	7.56358	8.26941	8.37549	8.28291	8.30143	8.16534	8.05742	8.75994	7.90551	7.81079
TGME49_255220	AP2 domain transcription factor AP2VIIb-3	AP2VIIB3	10.6227	10.3447	9.24012	9.09973	9.11085	8.96578	8.58144	4.7202	4.84966	7.29591
TGME49_229370	AP2 domain transcription factor AP2VIII-1	AP2VIII1	9.63514	8.22111	8.10618	8.16883	8.28547	7.87844	8.1546	10.3209	10.2354	4.18447
TGME49_233120	AP2 domain transcription factor AP2VIII-2	AP2VIII2	9.41852	7.47659	8.37153	9.07112	9.35716	8.92536	9.27156	9.25066	7.4282	8.03366
TGME49_273660	AP2 domain transcription factor AP2VIII-3	AP2VIII3	10.6456	9.83812	9.95561	9.98785	10.0471	9.87837	9.51487	5.43616	6.87861	9.34549
TGME49_272710	AP2 domain transcription factor AP2VIII-4	AP2VIII4	9.597	9.54276	7.51519	8.20919	9.02148	8.51899	9.07718	10.25	10.1951	9.48079
TGME49_271200	AP2 domain transcription factor AP2VIII-5	AP2VIII5	9.52314	8.94024	10.3386	10.4326	10.397	10.5074	10.7979	8.18669	8.86908	4.01176
TGME49_271030	AP2 domain transcription factor AP2VIII-6	AP2VIII6	12.2955	13.3796	10.8089	10.2467	10.3881	10.1718	10.1134	9.20318	9.40041	9.30832
TGME49_269010	AP2 domain transcription factor AP2VIII-7	AP2VIII7	12.3411	12.336	9.45931	9.57339	9.16446	8.79504	8.16475	6.43214	9.94143	10.5887
TGME49_227900	AP2 domain transcription factor AP2X-1	AP2X1	9.10127	9.12355	8.55616	8.64902	8.967	8.55367	8.86337	2.14547	2.42311	7.61677
TGME49_500042	AP2 domain transcription factor AP2X-10	AP2X10	4.58233	7.73104	9.41129	9.86101	10.0976	10.43	11.2114	5.39769	6.22246	9.88235
TGME49_215570	AP2 domain transcription factor AP2X-11	AP2X11	9.41531	8.33658	7.29493	8.60383	8.67524	8.28302	8.03954	9.82949	9.83231	5.62451
TGME49_225110	AP2 domain transcription factor AP2X-2	AP2X2	9.1861	7.22986	9.56666	9.5604	9.95507	9.39802	9.65393	10.5076	10.6602	6.16231
TGME49_224230	AP2 domain transcription factor AP2X-3	AP2X3	6.88574	6.76758	8.49562	9.39093	9.95334	9.13641	9.12612	8.59964	7.61749	6.646
TGME49_224050	AP2 domain transcription factor AP2X-4	AP2X4	9.91864	9.41424	9.62685	9.77286	9.71186	9.59605	9.15584	4.3276	4.41936	10.9063
TGME49_237090	AP2 domain transcription factor AP2X-5	AP2X5	11.6405	11.2303	8.20005	9.16219	9.71935	9.63964	11.9881	15.3245	15.5964	8.79489
TGME49_500344	AP2 domain transcription factor AP2X-6	AP2X6	7.49459	6.78267	10.3149	9.79917	10.2002	10.4113	10.333	3.78951	5.41449	3.98522
TGME49_214840	AP2 domain transcription factor AP2X-7	AP2X7	12.5554	11.6371	10.5681	10.6511	10.8011	10.7619	11.2666	14.3616	14.4344	12.3541
TGME49_214960	AP2 domain transcription factor AP2X-8	AP2X8	9.34711	8.24323	8.2523	8.42399	8.68208	8.54391	8.1039	7.36433	7.45331	9.74249
TGME49_215150	AP2 domain transcription factor AP2X-9	AP2X9	12.6894	10.8021	10.0735	10.1334	10.4068	10.0674	10.8266	13.6909	14.0311	10.5847
TGME49_309410	AP2 domain transcription factor AP2XI-1	AP2XI1	6.45783	7.21306	6.58364	7.64993	7.47111	7.61138	6.3357	7.8823	10.8686	10.6222
TGME49_310900	AP2 domain transcription factor AP2XI-2	AP2XI2	11.4451	10.7705	9.80029	9.73059	10.2368	10.0958	10.849	10.737	10.0299	10.5043
TGME49_310950	AP2 domain transcription factor AP2XI-3	AP2XI3	10.9488	10.2151	10.6525	10.7057	10.7525	10.5348	10.3638	11.2433	11.5735	10.5226
TGME49_315760	AP2 domain transcription factor AP2XI-4	AP2XI4	9.73811	10.6689	8.10658	8.53989	9.24911	8.60726	7.8549	9.77764	10.4746	11.5324
TGME49_216220	AP2 domain transcription factor AP2XI-5	AP2XI5	11.0536	10.8897	10.3657	10.613	10.7969	10.7261	11.2168	15.2498	15.6568	10.5989
TGME49_218960	AP2 domain transcription factor AP2XII-1	AP2XII1	12.4575	10.8149	7.68648	7.9652	8.66441	8.33985	10.0311	12.499	13.1203	9.74535
TGME49_500252	AP2 domain transcription factor AP2XII-10	AP2XII10	7.94862	6.86001	8.18732	8.22144	8.25847	8.39049	8.09094	7.37833	7.62269	9.36066
TGME49_217700	AP2 domain transcription factor AP2XII-2	AP2XII2	9.42366	8.65995	8.58793	8.65119	8.73713	8.64789	8.9466	7.16375	8.9339	4.36844
TGME49_246660	AP2 domain transcription factor AP2XII-3	AP2XII3	0.227194	1.13777	0	2.63998	3.07733	3.55251	2.54737	8.53625	10.4359	9.37871
TGME49_247700	AP2 domain transcription factor AP2XII-4	AP2XII4	10.2009	8.09105	9.41256	9.61231	10.2323	9.66957	9.55974	6.67198	5.96761	8.62273
TGME49_247730	AP2 domain transcription factor AP2XII-5	AP2XII5	9.28815	10.5259	9.202	8.73895	8.86429	9.03868	8.49882	11.194	12.2925	10.1207
TGME49_249190	AP2 domain transcription factor AP2XII-6	AP2XII6	7.96674	3.40632	9.28226	9.00355	8.89059	9.02593	8.81905	3.71321	4.16296	3.18663
TGME49_250800	AP2 domain transcription factor AP2XII-8	AP2XII8	11.6159	10.6162	9.04613	9.90791	10.2006	9.70027	9.34434	5.04208	5.97588	9.77816
TGME49_251740	AP2 domain transcription factor AP2XII-9	AP2XII9	10.4566	6.10502	6.90717	7.53403	8.14039	7.21923	7.21535	3.71231	8.04172	6.81153
TGME49_215895	AP2 domain-containing protein	N/A	6.72973	10.0708	8.51655	8.29855	7.97461	8.13896	7.17796	4.00276	6.65667	12.3301
TGME49_289080	AP-3 complex subunit beta, putative	N/A	9.19661	8.80436	9.22606	9.34626	9.28833	9.40685	10.598	11.686	11.5609	7.85091
TGME49_309370	AP-3 complex subunit delta, putative	N/A	9.33864	8.75451	9.40664	9.00337	9.01472	8.99734	9.90071	10.284	9.89461	9.43396
TGME49_301410	AP-4 complex accessory subunit Tepsin, putative	N/A	9.36049	8.15252	7.72744	8.61266	8.71947	8.2996	8.84618	11.2049	9.85552	8.91019
TGME49_266280	AP-4 complex subunit beta, putative	N/A	10.3605	9.50026	9.99417	9.79777	9.70775	9.81973	9.80079	10.4013	10.0932	11.1581
TGME49_269480	AP-4 complex subunit beta, putative	N/A	9.47445	8.16876	8.5235	8.60399	8.66353	8.51512	9.32485	12.0876	12.2297	8.82847
TGME49_244290	AP-4 complex subunit epsilon, putative	N/A	9.84652	8.61545	9.68042	9.45442	9.63745	9.49939	9.76551	8.14781	7.66992	8.0338
TGME49_207390	AP-4 complex subunit mu, putative	N/A	9.00251	8.54813	9.50561	9.37018	9.18862	9.18222	9.30493	10.6401	10.3425	10.3261
TGME49_314418	AP-4 complex subunit sigma, putative	N/A	9.69207	8.94263	9.83659	9.38875	9.2162	9.46471	9.67105	13.4201	14.2185	10.8708
TGME49_320550	AP-5 complex subunit beta-1, putative	N/A	10.2241	9.5222	8.97421	8.50099	8.723	8.50449	9.2609	9.22352	9.48912	10.4459
TGME49_224160	AP-5 complex subunit mu, putative	N/A	8.37307	7.91644	7.4042	7.80542	8.16457	7.98165	9.56642	13.1991	13.1141	8.04959
TGME49_220120	AP-5 complex subunit sigma, putative	N/A	8.20838	8.09869	7.18262	7.54567	7.33904	7.43882	7.65276	5.61595	3.97856	9.74704
TGME49_248150	AP-5 complex subunit zeta, putative	N/A	9.09722	8.36404	7.68136	7.62418	7.99747	7.70421	8.79722	8.87347	7.8266	7.9913
TGME49_310070	apical annuli methyltransferase AAMT	AAMT	10.8253	9.83835	11.2158	11.172	11.1063	11.3937	11.8312	9.60623	9.45622	9.43617
TGME49_242790	apical annuli protein AAP1	AAP1	10.2967	9.8241	8.9769	9.23723	9.66498	9.81329	9.84567	9.19659	8.2023	9.79289
TGME49_295850	apical annuli protein AAP2	AAP2	10.2268	9.8513	7.65753	8.01268	8.48433	8.24103	8.67545	11.2445	11.021	10.2046
TGME49_313480	apical annuli protein AAP3	AAP3	9.25096	8.06455	7.22798	7.34202	7.89962	7.15772	7.58827	5.12074	7.46587	9.72646
TGME49_230340	apical annuli protein AAP4	AAP4	10.1471	7.90859	8.49986	8.85615	9.28638	8.50219	7.84417	4.61698	6.4109	10.6727
TGME49_319900	apical annuli protein AAP5	AAP5	9.83501	8.15301	7.90036	7.85212	8.41161	8.13716	8.60483	10.4811	11.2697	8.7932
TGME49_222200	apical annuli protein LMBD3	LMBD3	8.46335	8.02708	8.90514	8.97012	8.73027	8.70436	8.3988	7.62865	7.20086	7.88144
TGME49_311480	apical cap protein AC1	AC1	10.3525	10.9111	11.5514	11.5837	11.4527	11.5506	11.0366	7.12423	7.70184	11.3284
TGME49_292950	apical cap protein AC10	AC10	10.4534	11.1712	9.42554	9.43426	9.62654	9.81637	10.3985	7.50119	10.4189	10.4828
TGME49_266080	apical cap protein AC11	AC11	13.2564	14.0927	3.47106	3.24259	2.57273	1.87684	0.605818	7.57403	12.307	11.6939
TGME49_249440	apical cap protein AC12	AC12	10.7472	10.4469	9.13193	9.2501	9.25111	8.92807	8.17707	6.61293	9.3307	8.80938
TGME49_220900	apical cap protein AC13	AC13	12.6454	11.4358	10.004	10.9518	11.0427	10.4548	9.80115	6.53967	10.1298	9.89444
TGME49_250820	apical cap protein AC2	AC2	10.8094	9.68935	8.37845	9.2372	9.59288	9.14726	8.08461	5.88827	6.35021	11.6671
TGME49_308860	apical cap protein AC3	AC3	12.3883	11.1242	9.53956	10.4063	10.7038	10.1057	9.28507	4.59122	8.90743	10.1775
TGME49_214880	apical cap protein AC4	AC4	11.6336	11.3775	7.90429	8.31281	8.48269	8.11105	7.09149	1.80799	6.7138	8.67117
TGME49_235380	apical cap protein AC5	AC5	10.7093	10.5989	8.94774	8.96709	8.73015	8.51469	7.71295	2.7368	7.42647	9.50721
TGME49_225690	apical cap protein AC7	AC7	11.2282	10.4903	9.31543	9.9175	10.1465	9.99032	8.93346	5.51617	7.86081	7.11384
TGME49_229640	apical cap protein AC8	AC8	10.1866	9.92844	8.50672	9.54457	10.0293	9.48044	8.75079	10.4574	9.76389	10.9767
TGME49_246950	apical cap protein AC9	AC9	10.0264	10.1806	8.47842	8.72706	8.60736	8.8061	9.36112	12.7608	12.8351	11.2115
TGME49_216080	apical complex lysine methyltransferase	AKMT	11.5666	12.6528	10.7035	10.6494	10.6918	10.6173	10.1153	7.28292	8.9042	11.747
TGME49_255260	apical membrane antigen AMA1	AMA1	14.0061	14.3614	4.22494	3.80059	2.74553	3.21878	2.35055	6.56034	8.7502	16.0674
TGME49_300130	apical membrane antigen AMA2	AMA2	5.98348	11.7471	9.32643	9.93868	10.2161	9.53704	8.74829	6.05259	8.23504	8.39344
TGME49_315730	apical membrane antigen AMA3	AMA3	1.14104	7.95546	6.29244	7.0691	7.66342	7.89737	9.7392	13.7615	14.4595	10.1817
TGME49_294330	apical membrane antigen AMA4	AMA4	8.21727	11.6629	10.3967	11.1294	11.7722	11.0409	10.1434	5.44491	5.88619	8.71373
TGME49_315510	apical polar ring protein APR1	2001-04-01	9.4077	10.0452	8.71112	9.41054	9.32041	8.48712	6.93065	6.75113	8.37235	8.31877
TGME49_243545	apical ring protein RNG1	RNG1	12.6145	11.6338	8.63651	9.47427	9.71221	9.4049	7.94232	2.80117	7.13805	13.9544
TGME49_244470	apical ring protein RNG2	RNG2	10.7664	10.6592	9.06282	8.7715	8.94276	8.92238	8.17223	7.68924	8.60175	8.39662
TGME49_320020	apicomplexan amino acid transporter ApiAT2	ApiAT2	10.9128	10.7287	12.6295	12.3752	12.0847	11.8082	11.7436	13.6559	14.3322	12.1493
TGME49_318150	apicomplexan amino acid transporter ApiAT3-1	ApiAT3-1	9.4968	9.12434	9.88038	9.82568	9.73355	9.71827	9.13915	6.39688	5.41813	9.57006
TGME49_248420	apicomplexan amino acid transporter ApiAT3-2	ApiAT3-2	11.4617	11.1576	10.2624	10.0123	9.77248	10.0765	10.0323	13.145	14.4105	11.7108
TGME49_220600	apicomplexan amino acid transporter ApiAT3-3	ApiAT3-3	10.4144	9.718	11.2298	11.1013	10.9453	11.2326	11.0943	11.731	11.991	10.5469
TGME49_248610	apicomplexan amino acid transporter ApiAT5-1	ApiAT5-1	9.41651	6.30526	8.28645	9.1699	9.46975	9.07529	9.79898	9.32839	9.41604	8.14001
TGME49_205520	apicomplexan amino acid transporter ApiAT5-2	ApiAT5-2	2.36675	7.17593	8.15362	9.45007	10.6318	11.1109	13.9196	18.4945	18.8949	11.9502
TGME49_257530	apicomplexan amino acid transporter ApiAT5-3	ApiAT5	14.52	14.5833	13.6998	14.245	13.7363	14.5739	12.9184	12.8963	13.8854	9.27918
TGME49_216710	apicomplexan amino acid transporter ApiAT5-4	ApiAT5-4	8.78398	8.62629	0	1.0478	0.693367	1.62664	2.43253	8.77686	9.9198	11.849
TGME49_293420	apicomplexan amino acid transporter ApiAT5-5	ApiAT5-5	8.82918	3.79656	0.53667	0.431376	0.912468	1.61671	0.977561	6.45688	10.4041	8.92213
TGME49_293425	apicomplexan amino acid transporter ApiAT5-6	ApiAT5-6	5.08878	1.55914	0	0.608889	0.42697	0.0502239	0	4.03315	6.05293	8.74705
TGME49_240810	apicomplexan amino acid transporter ApiAT6-1	ApiAT6-1	9.75496	8.35814	10.8279	10.9185	10.895	10.39	10.4528	12.5989	13.2509	7.13415
TGME49_290860	apicomplexan amino acid transporter ApiAT6-2	SNR1	9.96506	9.50956	10.4104	10.5208	10.5488	10.5861	10.8155	12.8652	13.8975	9.31836
TGME49_249580	apicomplexan amino acid transporter ApiAT6-3	ApiAT6-3	9.44054	9.44755	10.0592	10.0441	9.90522	10.0069	9.43679	5.33752	6.48446	9.05205
TGME49_263230	apicomplexan amino acid transporter ApiAT7-1	ApiAT7-1	11.2565	9.5309	11.1317	11.3794	11.3658	11.339	10.7448	8.26716	9.0336	10.0576
TGME49_263260	apicomplexan amino acid transporter ApiAT7-2	ApiAT7-2	10.9474	9.8789	11.932	12.0075	12.2401	12.0922	12.553	12.8706	13.3157	8.41833
TGME49_277940	apicomplexan kinetochore protein AKIT1	AKIT1	9.55949	8.54294	10.087	9.64783	9.5035	9.83648	9.76193	10.4428	9.74194	6.5784
TGME49_310730	apicomplexan kinetochore protein AKIT4, putative	AKIT4	9.98481	10.2991	9.12319	9.18537	9.06463	9.15347	9.72479	9.70262	9.34733	8.10486
TGME49_265770	apicomplexan kinetochore protein AKIT5, putative	AKIT5	10.1835	8.88111	9.4046	9.29386	9.47242	9.35422	9.89111	12.3727	12.1356	6.99815
TGME49_289700	apicomplexan kinetochore protein AKIT6, putative	AKIT6	9.16112	10.6842	9.60282	9.59178	9.2249	9.43739	9.1532	11.5083	11.5897	6.76494
TGME49_316530	apicomplexan kinetochore protein AKIT7, putative	AKIT7	8.94657	8.86358	8.68709	8.66082	8.49997	8.41539	8.38342	9.40139	8.06012	9.29114
TGME49_258450	apicomplexan kinetochore protein AKIT8, putative	AKIT8	9.87166	9.20977	9.79569	9.28894	9.15388	9.38588	9.50646	12.248	12.5193	6.74306
TGME49_500364	apicomplexan kinetochore protein AKIT9, putative	AKIT1	9.3736	9.1269	8.19598	8.43591	8.39342	8.35787	8.57214	10.4978	9.66856	10.7241
TGME49_500005	apicoplast DER1	DER1AP	9.6309	8.85605	8.68492	8.45061	8.17885	8.21356	7.9666	9.02063	8.66368	7.05313
TGME49_255370	apicoplast import protein TIC20	TIC20	8.50265	9.06668	9.26223	9.16449	8.7152	9.04012	8.20904	3.33759	4.24981	2.51782
TGME49_233540	apicoplast monocarboxylate transporter AMT1	AMT1	9.10185	8.06967	9.05892	9.07501	8.86582	9.09826	8.7841	4.47605	5.16614	10.1932
TGME49_297245	apicoplast monocarboxylate transporter AMT2	AMT2	10.1843	8.28338	9.23264	9.21467	9.32103	9.07775	9.09263	4.40331	1.93979	0.830914
TGME49_286050	apicoplast TIC22 protein	TIC22	9.03275	9.27624	10.1994	9.60377	9.37317	9.56644	8.99335	0.981132	1.56878	5.05315
TGME49_261070	apicoplast triosephosphate translocator APT1	APT1	11.5045	10.883	11.1812	11.0694	11.0349	10.904	10.8493	9.53861	9.86271	4.90456
TGME49_312110	apicoplast-associated thioredoxin family protein Atrx1	N/A	10.2604	9.62617	11.051	10.9262	10.5207	10.5336	9.92138	6.78483	6.41821	5.55395
TGME49_310770	apicoplast-associated thioredoxin family protein Atrx2	ATRX2	9.81892	11.0553	9.36307	9.11943	8.64125	8.96622	8.18891	5.84648	6.60264	8.01965
TGME49_322200	apocytochrome b, putative	N/A	5.29073	3.24079	4.50305	7.82188	7.00079	7.48704	6.78123	4.87661	4.5426	3.53242
TGME49_249650	apolipoprotein A-I binding protein, putative	N/A	9.48617	9.38016	9.62846	9.34814	9.65827	9.53348	10.4757	9.37757	9.30661	10.0896
TGME49_310810	apyrase	N/A	9.76821	8.81742	9.05427	9.18538	9.42771	9.67068	11.1176	13.9259	13.0094	9.48926
TGME49_215450	aquaporin 1	N/A	10.5889	11.2839	7.56527	7.96669	8.12049	8.79123	9.37609	12.2001	13.21	10.7348
TGME49_267070	aquaporin 2	AQP2	11.0329	10.3326	6.69463	6.85556	7.23726	7.38289	7.90915	7.84515	12.2822	10.5595
TGME49_314410	aquarius, putative	N/A	10.2782	9.2839	10.9914	10.6323	10.7167	10.7033	10.2829	10.7478	10.4584	9.8932
TGME49_265020	arabinogalactan protein, putative	N/A	9.12357	9.69312	9.93909	9.41833	9.17923	9.5511	9.46674	12.1601	12.984	10.4625
TGME49_299990	archease family protein	N/A	8.13009	8.84572	8.21667	8.17943	7.8697	8.40153	8.35644	11.9866	12.6847	9.45662
TGME49_225310	ARF1-directed GTPase-activating protein, putative	N/A	10.1391	11.0783	11.2744	10.9297	10.6879	10.97	10.7253	9.22812	9.97235	11.1717
TGME49_257070	Arf-GAP domain and FG repeat-containing protein AGFG	AGFG	8.8339	9.59209	9.00598	8.92832	9.19998	9.13563	9.66761	7.83063	9.08227	12.0989
TGME49_500055	arginine and glutamate-rich protein, putative	N/A	8.17432	8.62713	9.34072	9.2063	8.78959	9.04515	8.59011	6.51129	5.54484	5.8798
TGME49_210840	arginyl-tRNA synthetase family protein	N/A	9.92348	9.42359	11.413	11.6188	11.1324	11.3221	10.6694	0.329664	2.74702	9.55835
TGME49_310160	argonaute AGO	AGO	4.76211	6.93874	6.55308	8.41922	9.32903	10.0419	12.5547	16.5677	17.7406	11.3246
TGME49_235980	ARIADNE family protein	N/A	9.19681	9.20855	8.77763	8.75071	8.79168	8.75079	8.95377	10.6223	10.0188	6.94019
TGME49_246170	ARID/BRIGHT DNA binding domain-containing protein	N/A	10.3258	8.91587	9.9637	9.96139	10.1899	9.86066	9.66907	6.14921	5.40421	8.84904
TGME49_243670	ARM repeats containing protein	N/A	0.227194	1.13777	5.07956	6.22799	7.39577	8.05283	9.23935	8.91206	9.38618	5.41177
TGME49_219738	armadillo repeat-containing protein	N/A	7.94574	7.37128	8.85471	8.78892	8.8808	8.76026	7.89476	8.17632	7.87938	6.97873
TGME49_223780	armadillo repeat-containing protein	N/A	10.0247	9.38803	8.69089	8.18661	8.41666	8.53681	8.48627	8.99938	9.31835	8.80519
TGME49_242570	armadillo repeat-containing protein	N/A	10.8111	11.2	7.93135	8.27241	8.82662	9.18121	9.75821	6.35947	8.68013	10.251
TGME49_273905	armadillo repeat-containing protein	N/A	10.3044	9.40172	10.0841	9.97333	10.0245	10.0162	10.0046	9.48549	9.59538	9.84138
TGME49_500082	armadillo repeat-containing protein	N/A	5.97549	6.46592	6.19108	6.87517	7.22777	7.58749	8.58116	8.69667	8.64124	8.43009
TGME49_500238	armadillo repeat-containing protein	N/A	0.906841	0	4.98542	6.98454	8.26856	9.11633	10.2797	4.92856	4.66415	3.39959
TGME49_261440	armadillo repeats only protein ARO	ARO	11.6474	11.8006	9.80306	10.0563	10.0147	9.57986	8.88742	9.12057	9.82732	12.0807
TGME49_237600	Armadillo/beta-catenin family repeat-containing protein	N/A	9.55636	8.97678	9.46693	9.62692	9.83167	9.11564	8.25024	4.02195	3.57387	5.44137
TGME49_294770	Armadillo/beta-catenin family repeat-containing protein	N/A	9.67172	9.02293	9.71512	9.94844	9.98114	9.81024	10.2408	10.5868	10.0814	8.22328
TGME49_309190	ARO-interacting protein AIP	AIP	10.1182	9.5263	6.60991	7.45961	7.90502	7.63996	7.09307	3.91947	4.90988	11.0302
TGME49_287510	aromatic amino acid hydrolase AAH1	AAH1	4.83369	7.21785	3.31495	4.51923	5.18419	5.63335	7.62687	10.863	11.8137	5.26933
TGME49_212740	aromatic amino acid hydrolase AAH2	AAH2	2.36181	0	3.66218	4.76243	5.27417	5.63241	6.11451	8.70534	11.0558	10.7862
TGME49_307990	arrestin (or s-antigen), n-terminal domain-containing protein	N/A	8.28879	9.3343	8.57077	9.16299	9.19441	9.1224	9.75609	11.49	12.113	8.10199
TGME49_231190	arsenite-activated ATPase family protein	N/A	9.43527	9.68201	10.3822	10.364	10.0594	10.4185	10.3763	9.98705	9.39327	10.3912
TGME49_270760	asparagine synthase	N/A	7.17166	3.02558	4.28151	7.82112	7.79995	7.56027	7.58324	9.66925	9.37674	5.05945
TGME49_253430	asparagine synthetase, putative	N/A	13.1394	12.2009	12.2529	12.1559	12.0047	11.7988	11.952	8.16583	9.03195	14.2205
TGME49_270510	asparaginyl-tRNA synthetase (NOB+tRNA synthase)	N/A	11.7346	10.7715	11.9985	12.1962	12.1031	11.6045	11.4598	9.3414	10.2951	6.11504
TGME49_248600	aspartate aminotransferase	N/A	10.5695	11.027	10.8357	10.9304	10.6452	10.7129	10.7439	8.53834	7.80672	11.054
TGME49_291640	aspartate carbamoyltransferase	N/A	8.6166	9.12598	9.88814	9.61495	9.2758	9.39155	8.55651	1.24718	2.945	10.0981
TGME49_205420	aspartate-semialdehyde dehydrogenase	N/A	3.62373	3.20909	8.04564	8.07122	8.20068	8.62865	9.12939	11.8988	12.5868	6.07724
TGME49_202530	aspartate-tRNA ligase	N/A	9.68026	8.93549	11.3455	11.2237	11.0096	11.0842	10.7307	11.6956	12.4258	8.95578
TGME49_227090	aspartokinase	N/A	3.55117	7.90144	7.87676	8.15076	8.66286	8.77081	9.85278	13.2507	13.8842	7.64431
TGME49_201840	aspartyl protease ASP1	ASP1	11.634	13.4015	7.78161	8.47121	9.24332	10.0481	12.2844	17.2129	17.5762	12.8374
TGME49_262940	aspartyl protease ASP2	ASP2	1.72425	6.43425	0.783977	2.86039	2.43445	3.63095	3.4775	14.3464	15.8904	7.915
TGME49_246550	aspartyl protease ASP3	ASP3	12.4753	12.8669	11.2043	11.4812	11.4838	11.2355	9.96022	6.01035	7.96991	13.0198
TGME49_209620	aspartyl protease ASP4	ASP4	0.297242	2.16846	0	0	0	1.29275	0.457062	14.1349	15.4535	7.57225
TGME49_242720	aspartyl protease ASP5	ASP5	8.94076	9.03741	9.6604	9.84947	10.0473	9.99594	11.3319	14.2843	14.9328	8.544
TGME49_272510	aspartyl protease ASP6	ASP6	0	0	0	0.431376	0.693367	1.82857	0.674813	14.8388	16.2402	8.26727
TGME49_261530	aspartyl protease ASP7	ASP7	0.227194	0	9.30857	10.0572	10.8486	10.9566	12.8844	15.2231	16.043	9.44444
TGME49_500116	aspartyl/glutamyl-tRNA(Asn/Gln) amidotransferase subunit B, putative	N/A	8.53505	6.16448	7.68132	6.76616	6.8617	6.41874	6.37251	6.19035	6.23786	6.09084
TGME49_278750	AT hook motif domain-containing protein	N/A	8.84779	8.88999	8.59919	8.38995	8.56385	8.95812	10.6393	13.7613	13.7271	10.5365
TGME49_288600	ATG18/WIPI-like protein PROP1	PROP1	9.65437	10.7055	5.36372	7.35519	7.87245	8.37911	10.115	14.1627	14.7937	10.3246
TGME49_220160	ATG18/WIPI-like protein PROP2	PROP2	7.85661	7.5085	7.25451	7.46818	7.68678	7.4361	7.56574	6.20528	5.28641	7.81775
TGME49_215090	ATP binding protein, putative	N/A	9.21792	8.98097	8.90878	8.91972	8.87661	8.94039	9.12323	9.73902	9.18011	11.2262
TGME49_285720	ATP binding protein, putative	N/A	8.25471	7.3671	9.05651	8.85099	8.60308	8.92417	8.51154	9.91952	10.3294	10.1343
TGME49_261950	ATP synthase beta subunit ATP-B	ATPB	11.8973	10.363	12.9815	13.2567	13.063	12.7497	12.6497	8.9706	9.32363	4.20106
TGME49_249720	ATP synthase F0 subunit 9, putative	N/A	12.2049	11.0041	13.3035	13.3572	13.0434	12.9843	12.7393	2.20709	0.540102	9.73941
TGME49_231410	ATP synthase F0 subunit b-like protein	ICAP2	11.5885	11.8608	13.1038	12.8375	12.3708	12.69	12.0514	6.68209	7.3345	5.98796
TGME49_231910	ATP synthase F1 gamma subunit	N/A	10.4845	10.5319	11.929	11.7326	11.3687	11.5389	11.0074	4.52187	4.88964	8.40491
TGME49_314820	atp synthase F1, epsilon subunit, putative	N/A	9.75286	10.8398	11.1989	11.1531	10.668	11.0093	10.2477	6.61214	5.98549	9.32876
TGME49_213069	ATP synthase mitochondrial F1 complex assembly factor 1, putative	ATP11	7.17591	7.11051	8.44935	7.99801	7.85277	8.08064	7.47677	0.555079	0.918415	5.46597
TGME49_258060	ATP synthase subunit ATPTG8	ATPTG8	10.2851	9.51437	11.3939	11.3575	11.1927	11.1362	11.1055	11.0995	11.1811	9.91654
TGME49_285510	ATP synthase subunit ATPTG9	ATPTG9	10.652	10.2921	11.6766	11.5176	11.1669	11.4246	11.0547	12.4614	12.7494	9.71198
TGME49_226000	ATP synthase subunit delta	N/A	10.0265	9.81873	10.8463	11.0472	10.7109	10.8168	10.3713	6.4327	6.47002	5.98192
TGME49_268830	ATP synthase subunit delta	ICAP18	10.8815	9.72373	11.8632	11.9885	11.7673	11.6639	11.432	8.93006	8.71492	9.93394
TGME49_284540	ATP synthase subunit O	OSCP	10.4878	10.3675	11.3215	11.1668	10.8544	11.1275	10.745	11.9778	12.6435	8.97818
TGME49_201800	ATP synthase-associated protein	N/A	10.5693	9.6523	10.8019	10.8147	10.7445	10.3907	10.5335	9.12555	10.0186	9.66691
TGME49_208440	ATP synthase-associated protein	N/A	10.2815	11.4558	11.8886	11.7036	11.2313	11.5279	11.001	5.00329	5.05593	9.78725
TGME49_214930	ATP synthase-associated protein	N/A	10.234	10.6778	11.6856	11.6049	11.4334	11.4847	11.4064	8.95533	9.05729	11.7642
TGME49_215610	ATP synthase-associated protein	ICAP11	10.494	9.26665	10.0262	10.443	10.4576	10.1401	10.4247	7.2452	8.31384	11.0731
TGME49_218940	ATP synthase-associated protein	ICAP8	10.4177	9.91592	10.8301	10.9075	10.782	10.5695	10.6267	8.21627	8.24066	9.11497
TGME49_225730	ATP synthase-associated protein	N/A	10.6924	11.7715	11.355	11.3043	10.9646	11.1604	10.8338	9.63621	10.009	10.8354
TGME49_245450	ATP synthase-associated protein	N/A	10.2201	11.0449	11.4461	11.336	10.8996	11.1555	10.6926	10.6524	10.4762	9.5888
TGME49_247410	ATP synthase-associated protein	ICAP9	10.2864	10.5947	11.2314	11.0371	10.8742	10.9623	10.7139	12.216	12.4055	10.9235
TGME49_260180	ATP synthase-associated protein	ICAP6	11.214	10.9273	11.4121	11.5161	11.3627	11.2784	11.3024	12.5032	12.6669	11.1476
TGME49_263080	ATP synthase-associated protein	N/A	10.2856	9.8836	11.1234	10.8108	10.5325	10.6346	10.3901	10.4281	10.6479	8.56422
TGME49_270360	ATP synthase-associated protein	N/A	10.5114	10.8889	11.6787	11.4788	10.961	11.1125	10.7464	9.70254	9.44071	10.405
TGME49_282180	ATP synthase-associated protein	ICAP15	11.4428	11.508	12.5284	12.2867	11.8862	12.0396	11.5312	1.70653	2.33267	11.1633
TGME49_290030	ATP synthase-associated protein	N/A	10.7825	9.90388	11.515	11.47	11.2124	11.1516	10.9315	3.97321	4.14423	10.1927
TGME49_310180	ATP synthase-associated protein	N/A	10.5895	11.7169	11.6734	11.478	11.1867	11.3774	11.0505	3.83292	3.98754	10.0758
TGME49_310360	ATP synthase-associated protein	N/A	10.5821	10.2235	11.2926	11.206	10.9099	11.0894	10.8236	10.1773	10.489	9.5977
TGME49_500283	ATP:guanido phosphotransferase, putative	N/A	1.55771	7.69152	8.06455	8.9124	9.2765	9.52448	10.4011	7.9832	8.73318	7.05395
TGME49_218610	ATPase (DUF699) protein	N/A	8.56979	4.19451	8.83223	9.56875	9.48021	9.21176	8.55509	0	1.80105	7.50361
TGME49_230830	ATPase family associated with various cellular activities (AAA) domain-containing protein	N/A	6.25621	3.35525	5.40761	7.33488	9.00849	8.61906	10.3205	7.356	7.81921	7.88006
TGME49_286932	ATPase family associated with various cellular activities (AAA) domain-containing protein	N/A	7.76212	7.86456	7.62984	8.40627	9.1083	9.18781	10.2815	10.3128	10.4636	10.3595
TGME49_242625	ATPase family associated with various cellular activities (AAA) subfamily protein	N/A	8.08598	8.27672	10.3351	10.2689	10.4354	10.4861	9.51296	0.755401	4.40102	6.89195
TGME49_305340	ATPase MORC	MORC	11.5658	9.80369	11.6265	11.4477	11.662	11.575	11.6449	8.77484	8.14967	9.91654
TGME49_204400	ATPase synthase subunit alpha, putative	N/A	12.068	11.4228	12.9569	13.1057	12.9651	12.6117	12.6685	9.65243	9.13922	11.1513
TGME49_211050	ATPase, AAA family protein	N/A	1.42525	2.01636	3.20983	5.65165	6.57486	6.96169	8.0264	7.75156	7.76529	4.34843
TGME49_234420	ATPase, AAA family protein	N/A	8.90655	7.62187	10.605	10.7125	10.5316	10.5392	9.73049	1.44714	2.01928	6.42288
TGME49_235170	ATPase, AAA family protein	N/A	10.8114	10.874	11.0837	10.6066	10.2077	10.4755	9.73454	6.11696	7.26872	12.0469
TGME49_235610	ATPase, AAA family protein	N/A	8.16313	7.26045	8.96216	8.58535	8.23709	8.24808	7.36964	8.91995	9.59785	7.22601
TGME49_247390	ATPase, AAA family protein	N/A	7.05084	7.67844	8.96708	8.23882	8.30809	8.35972	7.86831	1.31777	1.74134	8.11314
TGME49_252250	ATPase, AAA family protein	N/A	7.15235	8.5986	7.3067	7.55614	7.44451	7.64006	7.49059	11.457	11.4577	8.96063
TGME49_270900	ATPase, AAA family protein	N/A	9.14083	7.70975	8.62675	8.60778	8.57604	8.2927	8.53057	4.56763	3.8558	5.90364
TGME49_288520	ATPase, AAA family protein	N/A	0.227194	6.90677	3.94097	5.11996	5.48773	4.43342	2.37148	14.9481	16.0904	8.25009
TGME49_299168	ATPase, AAA family protein	N/A	6.78706	6.53314	6.55062	7.1665	7.19094	6.99385	6.69874	6.41904	6.0723	6.60696
TGME49_308960	ATPase, AAA family protein	N/A	4.91111	6.06572	9.52322	9.25958	9.84783	9.89686	10.3727	7.80655	9.27457	6.99084
TGME49_312310	ATPase, AAA family protein	N/A	8.53517	9.13318	5.56456	7.92601	7.89794	7.91871	8.06386	8.06988	7.5265	8.5328
TGME49_500389	ATPase, AAA family protein	N/A	10.1131	8.88608	9.67224	9.7421	10.2478	10.3175	10.792	12.3825	12.8353	7.72611
TGME49_217020	ATPase, AFG1 family protein	N/A	8.40148	8.33537	9.43059	9.56891	9.31426	9.31852	8.74553	9.42924	9.88668	8.8432
TGME49_255350	ATPase, putative	N/A	8.90415	9.60493	9.13978	9.5463	9.04115	9.31678	8.2608	5.31578	7.24412	10.7233
TGME49_227050	ATPase/histidine kinase/DNA gyrase B/HSP90 domain-containing protein	N/A	8.24934	9.32245	8.16346	8.442	8.49813	8.75805	9.42275	13.804	14.6196	13.1849
TGME49_293260	ATPase/histidine kinase/DNA gyrase B/HSP90 domain-containing protein	N/A	12.247	10.8182	10.4371	10.4196	10.8705	10.4841	11.2445	11.8045	11.9413	6.32981
TGME49_318560	ATPase/histidine kinase/DNA gyrase B/HSP90 domain-containing protein	N/A	9.1777	10.1585	9.08686	8.90918	8.78427	9.29732	9.74686	12.2988	12.6045	10.2795
TGME49_247540	ATP-binding cassette G family transporter ABCG107	ABCG107	7.69088	9.2085	8.59225	8.30815	8.5169	8.5056	9.36749	11.3475	11.2985	9.35866
TGME49_315560	ATP-binding cassette G family transporter ABCG77	ABCG77	6.83035	8.04738	5.97549	7.35905	7.89893	8.89046	10.8813	15.6052	16.357	12.3728
TGME49_289350	ATP-binding cassette G family transporter ABCG84	ABCG84	8.76603	8.78951	9.26312	9.33788	9.21608	9.30464	9.19692	0	1.2241	3.58671
TGME49_244270	ATP-binding cassette G family transporter ABCG87	ABCG87	9.10318	8.89706	8.98254	8.73138	8.8869	8.94436	8.80902	9.03817	8.42412	6.52985
TGME49_290580	ATP-binding cassette G family transporter ABCG89	ABCG89	9.30397	9.37663	9.94238	9.82896	9.65994	9.85059	9.93945	9.18432	9.4795	3.6738
TGME49_288920	ATP-binding cassette G family transporter ABCG96	ABCG96	10.8904	9.47966	8.19039	9.53345	9.85428	9.12718	8.86913	6.2016	4.88964	10.4218
TGME49_249820	ATP-binding cassette sub-family B member 5	N/A	9.892	9.64034	8.53224	8.25293	7.84283	7.94896	7.23904	3.14764	3.55127	6.3731
TGME49_216790	ATP-binding cassette sub-family E member 1, putative	N/A	8.96968	4.28746	10.7152	10.5189	10.2264	10.3293	10.3504	13.1762	13.8616	9.2883
TGME49_318710	ATP-binding cassette sub-family F member 1	N/A	9.57579	8.13412	10.5599	10.4308	10.3628	10.2696	10.3635	8.64162	8.51357	8.03319
TGME49_260310	ATP-binding cassette transporter ABC.B1	ABCB1	8.43945	7.19742	11.6202	11.6368	11.8264	11.3245	11.9262	8.6926	8.48253	8.77893
TGME49_213650	ATP-binding domain 1 family protein	N/A	9.21225	10.3426	9.20605	9.26505	8.88074	9.14229	8.66064	11.0704	11.4058	11.1701
TGME49_202850	ATP-binding domain-containing protein	N/A	7.30113	3.63653	7.5938	7.49767	7.67621	7.59549	6.70184	6.39753	6.31072	3.86676
TGME49_325500	ATP-binding Mrp/Nbp35 family protein	N/A	3.09499	5.01368	0.783977	3.66605	2.59442	1.64793	2.43253	6.4032	5.63277	5.21302
TGME49_223840	ATP-citrate lyase, putative	N/A	10.8323	10.0834	10.9175	10.9977	11.327	11.3376	12.493	8.55798	8.01473	11.3081
TGME49_203270	ATP-dependent Clp endopeptidase, proteolytic subunit ClpP domain-containing protein	N/A	8.07324	7.07231	7.25818	7.83739	7.91102	8.05672	8.60151	11.7674	11.2749	7.69962
TGME49_318320	ATP-dependent Clp endopeptidase, proteolytic subunit ClpP domain-containing protein	N/A	8.25642	8.17851	7.95683	8.198	8.32454	8.06087	8.12177	8.16083	7.55758	9.93562
TGME49_295910	ATP-dependent Clp protease adaptor protein ClpS protein	N/A	9.88118	10.3441	10.2442	10.1416	9.90135	9.96193	9.79548	9.46385	9.71827	12.29
TGME49_248160	ATP-dependent DNA helicase 2 subunit KU70	KU70	8.81422	8.40865	7.52706	7.09004	6.77534	7.09307	7.32002	7.6486	6.406	7.47346
TGME49_312510	ATP-dependent DNA helicase 2 subunit KU80	KU80	8.5196	9.17765	7.77727	7.62661	7.27052	7.5121	7.45671	8.50847	8.57725	8.75169
TGME49_259250	ATP-dependent DNA helicase, RecQ family protein	N/A	7.79315	8.24649	8.51595	8.45145	8.29372	8.64048	9.22073	12.437	13.0017	6.17337
TGME49_264840	ATP-dependent DNA helicase, RecQ family protein	N/A	8.23276	8.59406	7.37394	7.73518	7.67366	7.98217	9.26143	13.1642	13.4526	8.46539
TGME49_306080	ATP-dependent DNA helicase, RecQ family protein	N/A	9.43277	8.78219	9.04442	8.91679	8.88098	8.89162	9.22001	5.07509	4.67785	6.81512
TGME49_316300	ATP-dependent DNA helicase, RecQ family protein	N/A	8.42298	9.46178	9.80098	9.47966	9.15203	9.47842	9.2588	11.8745	12.3722	8.205
TGME49_293460	ATP-dependent DNA ligase domain-containing protein	N/A	8.16002	7.84067	2.88452	6.08251	6.66129	6.38661	5.72278	8.00319	8.61466	9.93399
TGME49_289780	ATP-dependent hsl protease ATP-binding subunit hslU, putative	N/A	9.15584	9.00379	9.264	9.50741	9.81142	10.0193	10.6447	7.22195	6.17341	10.4804
TGME49_202630	ATP-dependent metallopeptidase HflB subfamily protein	N/A	10.5821	9.7313	10.782	10.9147	10.9446	10.8394	11.0923	9.72214	9.06857	11.5891
TGME49_300020	ATP-dependent metallopeptidase HflB subfamily protein	N/A	8.87526	8.63273	8.89138	9.19337	9.22252	9.19803	9.37674	12.0766	12.7503	10.6857
TGME49_210730	ATP-dependent protease ATPase subunit ClpY, putative	ClpY	9.5323	9.87243	9.77192	9.62219	9.41983	9.59863	9.13514	7.56396	7.39736	11.0045
TGME49_233520	ATP-dependent RNA helicase	N/A	10.2698	9.87847	10.7007	10.7012	10.4576	10.5273	9.94666	10.9931	11.8778	6.93995
TGME49_207430	ATP-dependent RNA helicase DDX1, putative	N/A	9.78317	9.16894	9.35366	9.25336	9.14039	9.11063	9.21658	8.94502	9.00149	10.5268
TGME49_232530	ATP-dependent RNA helicase SUV3, putative	N/A	8.78855	8.92125	8.33245	8.08359	7.95503	8.00797	7.35197	9.93059	10.3882	7.35368
TGME49_243340	atypical MEK-related kinase (incomplete catalytic triad)	N/A	8.56018	7.53862	9.1059	8.85766	8.73174	8.7818	8.28169	6.48509	6.35477	8.44987
TGME49_260030	atypical MEK-related kinase (incomplete catalytic triad)	N/A	7.92465	7.96448	7.7637	7.71603	7.42044	7.84955	8.05782	9.79879	9.49323	5.97247
TGME49_210280	aurora-related kinase ARK1	ARK1	9.61777	8.89504	9.78456	9.63109	9.35852	9.68002	10.4455	13.9787	14.8371	8.2798
TGME49_318770	aurora-related kinase ARK2	ARK2	9.50971	6.65301	8.71862	8.6271	8.72734	8.81407	9.38561	9.89618	9.32611	9.02642
TGME49_203010	aurora-related kinase ARK3	ARK3	10.4937	10.266	8.43544	8.47965	8.41913	8.30002	7.58099	5.36007	8.75002	10.051
TGME49_206450	autophagy-related cysteine peptidase atg4, putative	N/A	11.6892	11.0944	8.11121	7.48709	8.29122	8.24807	10.1352	13.453	12.8894	10.1419
TGME49_236110	autophagy-related protein 3 atg3, putative	N/A	9.70417	9.76159	8.75931	8.62468	8.77165	8.99432	9.87047	10.429	10.0325	10.0719
TGME49_321300	autophagy-related protein ATG12	ATG12	8.70059	9.6472	5.05997	7.65895	7.42461	7.5888	7.96402	11.5753	12.0715	10.2246
TGME49_230860	autophagy-related protein ATG5, putative	N/A	9.49423	9.14246	8.41512	8.1961	8.6241	8.12012	8.91107	9.07221	7.98487	10.6366
TGME49_221360	autophagy-related protein ATG6, putative	N/A	9.27322	9.64814	7.28478	8.36591	8.23097	8.35636	9.5369	13.6016	14.1394	11.4093
TGME49_229690	autophagy-related protein ATG7	ATG7	10.3066	9.29501	8.89188	8.97585	9.20347	9.11454	9.71535	8.07301	8.94693	9.50856
TGME49_254120	autophagy-related protein ATG8	ATG8	11.3783	13.3404	9.86808	9.82631	9.68766	10.1963	11.1128	15.4174	16.3265	12.8279
TGME49_260640	autophagy-related protein ATG9	ATG9	9.64082	9.88179	4.34257	6.78399	7.58032	8.15629	10.6027	11.9401	12.3595	12.0894
TGME49_258880	axonemal dynein light chain p33, putative	N/A	5.73007	7.67844	7.15238	8.14679	8.58225	8.96248	9.692	8.01768	8.53995	11.0266
TGME49_288390	B3GNTL1 protein	N/A	8.35219	7.90736	8.31551	8.59838	8.33315	8.36927	7.39094	3.59381	1.89649	7.92826
TGME49_283765	B9 domain-containing protein	N/A	0.297242	0	5.89158	6.02459	6.46518	6.55121	7.60605	2.76842	1.6137	2.96145
TGME49_255620	B9-C2 domain-containing protein	N/A	3.15271	7.23907	4.94624	6.9448	7.30397	7.7581	8.73169	6.27098	6.36785	5.41729
TGME49_259965	Bardet-Biedl syndrome 5, putative	N/A	1.5495	4.6294	6.38727	8.06631	8.94454	9.02252	10.8541	10.7547	11.1258	10.2947
TGME49_294860	basal complex component BCC0	BCC0	9.09326	8.58296	8.52193	7.9919	8.34462	8.11438	9.14714	9.53985	8.48668	5.85939
TGME49_232780	basal complex component BCC1	BCC1	10.3043	9.92773	7.7777	8.71025	8.69288	8.47688	8.70023	8.9642	10.8581	7.41867
TGME49_310220	basal complex component BCC10	BCC10	10.1639	8.34413	8.16482	8.81119	9.40107	9.22197	10.9332	14.3814	14.7349	7.72893
TGME49_278130	basal complex component BCC11	BCC11	9.97107	10.1206	8.78189	8.80662	8.60911	8.55681	7.71602	7.14128	9.48574	7.91631
TGME49_231070	basal complex component BCC2	BCC2	11.0449	10.6664	8.88086	9.24549	9.37125	9.47069	11.063	15.2142	15.3128	9.18928
TGME49_311770	basal complex component BCC3	BCC3	9.63785	8.72807	8.0735	8.65699	8.96894	8.5456	8.19038	7.40029	8.68771	8.11094
TGME49_229260	basal complex component BCC4	BCC4	9.52227	7.27037	8.55497	8.54068	9.0839	8.61369	9.80043	10.7116	9.9189	5.95397
TGME49_269460	basal complex component BCC5	BCC5	10.4387	7.47659	8.0931	8.8419	9.24594	8.48995	10.0253	13.2863	12.048	6.88299
TGME49_202550	basal complex component BCC6	BCC6	10.1495	9.24474	8.43968	8.4062	8.84945	8.46296	8.57299	7.5672	8.08252	8.04588
TGME49_311230	basal complex component BCC7	BCC7	12.238	11.6974	8.16287	8.69903	9.3286	8.90392	7.92295	5.42366	7.01586	12.2715
TGME49_273050	basal complex component BCC8	BCC8	8.8948	10.161	7.47324	7.84722	7.54229	7.56888	6.26334	5.64025	7.62866	9.19014
TGME49_200330	basal complex component BCC9	BCC9	10.2607	11.0969	7.79437	8.48993	8.53395	8.31704	7.08834	3.02431	5.74524	11.2329
TGME49_255900	Bax inhibitor-1, putative	N/A	11.3686	13.4277	11.7229	11.4868	11.1733	11.6949	11.6761	14.9349	15.731	14.3778
TGME49_299190	B-box zinc finger domain-containing protein	N/A	8.30867	7.30058	7.50309	7.68153	7.6322	7.52343	8.17111	12.7614	11.9933	7.56192
TGME49_263000	BEACH domain-containing protein BDCP	BDCP	9.90128	9.05566	9.19929	8.76095	8.94074	9.01115	8.99314	5.16113	5.20671	10.4557
TGME49_299200	Bet3 transport protein, putative	N/A	9.62547	10.2269	10.0759	9.84752	9.66351	9.69901	9.74008	10.2966	10.4158	9.9309
TGME49_240870	beta adaptin protein, putative	N/A	10.3289	10.0786	10.6568	10.4948	10.3501	10.3313	10.4028	11.016	11.0056	9.46143
TGME49_266960	beta tubulin	N/A	14.1283	13.5204	13.8556	14.0281	13.7577	13.7715	14.0978	16.7465	16.839	12.8975
TGME49_212240	beta-1 tubulin, putative	N/A	0.83607	0	7.00842	8.6295	9.64163	10.0802	11.3242	8.96309	9.34266	6.9262
TGME49_239930	beta-catenin family protein 1, putative	N/A	9.12863	9.54619	10.0216	9.76646	9.51228	9.76554	9.23722	4.30648	3.46527	9.99427
TGME49_266990	beta-COP	N/A	11.4701	10.7519	11.152	11.2024	11.3255	11.0943	11.7103	11.1793	10.3728	10.5639
TGME49_321570	beta-hydroxyacyl-acyl carrier protein dehydratase (FABZ)	FABZ	10.5294	11.4988	10.7744	10.6934	10.3922	10.7033	10.3839	3.72756	5.78751	6.76856
TGME49_231890	beta-ketoacyl-acyl carrier protein synthase III, putative	N/A	9.20762	8.9591	8.84486	9.14856	9.15413	8.94185	8.58256	0.980816	1.40387	4.01022
TGME49_297420	beta-tubulin cofactor D, putative	N/A	8.96529	8.82454	9.13051	8.98702	9.01805	9.24931	9.31712	8.69427	9.32686	10.253
TGME49_221620	beta-tubulin, putative	N/A	12.5465	10.8818	12.0199	12.9124	13.1505	12.8401	13.5861	14.1463	14.5303	11.1509
TGME49_271190	bicoid-interacting protein BIN3	BIN3	7.71134	8.1789	8.70587	8.44819	8.39424	8.58237	9.49786	13.3125	13.8003	9.72014
TGME49_249180	bifunctional dihydrofolate reductase-thymidylate synthase	DHFR-TS	11.6614	10.1023	11.1048	10.6558	10.2158	10.4688	9.84133	6.65833	6.03586	6.12034
TGME49_230450	bifunctional GMP synthase/glutamine amidotransferase protein	N/A	9.90722	9.68004	11.0108	11.0509	10.693	10.7084	9.80163	5.81622	6.23854	10.8871
TGME49_271350	bifunctional protein FolC subfamily protein	N/A	10.4376	9.52807	9.70449	9.44161	9.09603	9.30314	8.62812	4.18145	5.41673	10.2636
TGME49_268640	BING4CT (NUC141) domain-containing protein	N/A	7.97483	8.26965	9.0811	9.45245	9.07066	9.13233	8.43001	7.99407	8.94155	9.54931
TGME49_289760	biotin--protein ligase, putative	N/A	9.44945	8.45808	8.31876	8.41797	8.37215	8.63857	9.00888	11.492	11.0588	11.0173
TGME49_269600	biotin-requiring enzyme domain-containing protein	N/A	6.96344	9.08123	7.6302	8.80533	9.59996	10.3563	12.6853	16.6081	17.4627	10.758
TGME49_225810	BIR protein	N/A	9.89048	10.1108	9.87053	9.83261	9.57254	9.82437	9.3748	8.33032	7.29746	9.73318
TGME49_268620	blood stage antigen 41-3 precursor, putative	N/A	0.297242	3.202	3.96953	5.8093	5.42732	4.27053	2.28586	14.7636	16.3029	8.73373
TGME49_230070	BolA family protein	N/A	8.0552	9.2804	7.53912	7.88131	7.48207	7.47033	6.37381	1.86684	0.446648	7.48017
TGME49_259020	bradyzoite antigen BAG1	BAG1	12.3627	17.4699	4.54622	2.92384	3.19337	2.95978	2.19483	3.66538	3.82088	1.56744
TGME49_311100	bradyzoite formation deficient protein BFD2	BFD2	12.9536	13.9897	3.32161	2.89428	2.56903	2.6382	2.54737	7.26879	8.2319	7.93991
TGME49_253330	bradyzoite pseudokinase BPK1	BPK1	12.4151	16.3207	5.56913	3.84627	3.18969	2.02947	1.18099	5.55398	5.97302	4.98912
TGME49_314250	bradyzoite rhoptry protein BRP1	BRP1	8.65781	13.6287	11.2911	11.9484	11.6218	11.6348	10.6887	6.22841	9.17843	10.3398
TGME49_200385	bradyzoite-formation deficient protein BFD1	BFD1	12.5779	13.9362	5.80105	6.53681	6.58155	6.75769	6.93065	7.95145	9.74112	11.0184
TGME49_203450	brain colonization protein BCP1	BCP1	9.91601	8.45073	10.3276	10.134	9.77513	9.85688	9.29999	5.42583	4.76704	3.83034
TGME49_297850	Branched-chain-amino-acid aminotransferase	N/A	8.50342	10.0875	7.45296	7.91577	7.9394	7.8203	6.28557	11.5618	12.6102	11.2564
TGME49_237480	BRCA1 C Terminus (BRCT) domain-containing protein	N/A	9.0402	8.18124	8.74139	8.80988	8.92454	9.03421	9.39762	9.10714	8.09568	8.91169
TGME49_239790	BRCA1 C Terminus (BRCT) domain-containing protein	N/A	10.2272	10.2405	11.406	11.3309	11.0893	11.122	10.035	2.28535	4.21597	6.99305
TGME49_258480	BRCT domain-containing protein	N/A	9.95803	10.6319	10.3607	9.72362	9.58463	10.1783	10.1768	12.3748	13.3927	9.83845
TGME49_232440	Brf1p family coiled coil protein	N/A	12.2063	11.6336	13.6032	13.3856	13.1683	13.2519	13.1335	12.3664	12.0494	11.0729
TGME49_232520	brix domain-containing protein	N/A	8.71411	7.78529	9.73754	9.92748	9.81296	9.65938	8.97872	7.35224	7.68416	9.2836
TGME49_273840	brix domain-containing protein	N/A	8.6735	8.66928	9.70009	9.60937	9.65197	9.42007	8.63192	2.45413	3.4098	9.16113
TGME49_214240	bromodomain-containing protein	N/A	9.17168	8.86998	9.34981	9.23981	9.28125	9.07229	8.93895	7.49975	7.37178	9.59209
TGME49_263580	bromodomain-containing protein BDP1	BDP1	10.0486	9.83547	10.1832	10.2183	10.2122	10.15	9.67131	6.8359	6.23828	11.2635
TGME49_264640	bromodomain-containing protein BDP2	BDP2	11.1915	9.84139	10.6355	10.5663	10.8189	10.5005	10.4037	12.8322	13.4517	10.8654
TGME49_258990	bromodomain-containing protein BDP3	BDP3	8.85266	7.99242	9.3064	8.79557	8.7568	8.7	8.54331	7.86631	6.37362	7.35461
TGME49_306460	bromodomain-containing protein BDP4	BDP4	8.67832	8.64358	8.70269	8.78992	8.76445	8.65571	8.55794	8.7407	9.05979	8.93087
TGME49_264020	bromodomain-containing protein BDP5	BDP5	9.32218	8.95274	9.24466	9.38903	9.19015	9.07554	9.1292	10.1969	10.8387	10.5345
TGME49_311625	bromodomain-containing protein BDP6, putative	BDP6	8.4747	7.56978	9.33598	9.00815	9.2863	9.29298	10.3279	13.026	12.995	8.76299
TGME49_220320	BSD domain-containing protein	N/A	8.32947	8.48457	5.03096	7.45555	7.287	7.47069	7.62742	6.06317	4.49261	9.12231
TGME49_201690	BT1 family protein	N/A	8.15745	10.1068	2.90671	3.56695	3.46469	5.09281	4.63117	5.79136	5.89034	11.0757
TGME49_225140	BT1 family protein	N/A	0.655405	2.22711	6.69929	8.77094	9.44157	10.3599	12.6088	12.3404	14.0093	10.3404
TGME49_236020	BT1 family protein	N/A	0.227194	1.55914	7.15652	7.23091	7.7054	8.06463	9.12285	11.6613	12.4842	5.96848
TGME49_266366	BT1 family protein	N/A	11.7899	10.583	11.7013	12.0557	12.3603	11.8271	11.9863	13.9985	14.6618	11.0901
TGME49_224180	BTB domain-containing protein	N/A	7.64847	9.28468	0.53667	3.79581	3.55413	4.36531	4.38574	7.90994	11.1293	12.7807
TGME49_218930	BTB/POZ domain-containing protein	N/A	7.62004	6.03741	7.04262	8.41202	9.00791	9.19504	10.4097	9.66682	8.94714	6.03148
TGME49_266860	BTB/POZ domain-containing protein	N/A	8.45831	3.24079	6.93247	8.60713	9.2368	10.2863	12.4243	17.1361	18.329	11.7283
TGME49_270340	BTB/POZ domain-containing protein	N/A	5.80636	3.02558	8.98163	8.70166	9.42794	9.57691	11.061	14.2966	14.0291	8.91266
TGME49_229470	Btz domain-containing protein	N/A	9.62297	10.0235	9.97116	9.94633	9.91993	9.83082	10.3249	9.62724	8.87631	10.5318
TGME49_264710	bucentaur or craniofacial development domain-containing protein	N/A	9.14463	10.0947	9.45707	9.26845	9.03209	9.22923	9.04619	6.79874	6.8979	10.2488
TGME49_226240	bud site selection protein, putative	N/A	7.80991	8.42065	8.71712	8.80407	8.31919	8.57965	7.17648	6.34689	7.39775	8.43732
TGME49_238240	bystin protein	N/A	10.4647	11.1304	11.2821	11.7106	11.3927	11.1458	10.4073	3.14764	3.17402	7.23278
TGME49_262470	C protein immunoglobulin-A-binding beta antigen, putative	N/A	3.99223	6.68955	2.16702	5.47868	5.51432	5.68234	5.52442	17.9414	19.3112	11.2296
TGME49_233430	C2 domain containing protein	N/A	8.78654	4.17779	8.15936	8.47126	8.79647	8.29696	8.82191	9.67828	8.73707	7.11924
TGME49_233320	C2 domain-containing protein	N/A	4.53834	7.16345	5.36372	5.8864	7.16029	7.85533	9.05774	12.4488	13.307	6.09561
TGME49_241840	C2 domain-containing protein	N/A	9.98418	10.2394	9.87808	10.1688	10.1765	9.97889	10.075	12.7283	13.5843	11.6963
TGME49_254750	c3orf15 protein	N/A	0.524436	2.01636	4.56761	6.50283	7.55025	8.40619	9.12323	6.14721	7.55566	4.67362
TGME49_251570	CAAX amino terminal protease family protein	N/A	6.30302	2.57642	4.49905	6.73333	7.18535	6.70938	6.87767	6.05522	6.59161	5.82899
TGME49_221170	CAAX metallo endopeptidase	N/A	9.95243	9.7242	11.0896	10.8826	10.6343	10.8219	10.7262	11.001	10.8313	6.77165
TGME49_244380	cactin	N/A	10.792	11.1242	11.237	11.3382	11.1136	11.138	10.6321	10.6659	11.479	13.3125
TGME49_233930	CAF1 family ribonuclease	N/A	7.73808	7.66861	9.31927	9.42746	9.1982	9.31362	8.51449	6.37038	6.30494	9.00114
TGME49_300340	CAF1 family ribonuclease	N/A	8.07668	7.89604	9.0972	8.78814	8.63815	8.56363	7.98243	6.05873	5.1368	8.74075
TGME49_202400	calcium binding egf domain-containing protein	N/A	3.95588	3.63653	9.45019	9.94497	10.8336	10.7461	12.752	15.6045	16.5247	10.2702
TGME49_315540	calcium binding egf domain-containing protein	N/A	0.524436	1.82339	0	3.48998	4.43836	6.11805	7.69749	13.0174	12.5612	10.3839
TGME49_229480	calcium binding protein precursor, putative	N/A	13.024	12.6593	13.223	12.9635	12.6622	12.8319	12.9649	12.1699	12.0315	12.354
TGME49_228750	calcium dependent protein kinase CDPK7	CDPK7	10.0399	9.87719	10.1134	9.73047	9.77202	9.8631	9.9108	10.3939	10.2002	10.91
TGME49_292055	calcium dependent protein kinase CDPK8	CDPK8	9.31671	9.79867	9.04412	9.1842	9.2599	9.06253	8.70074	3.60893	4.86392	11.0346
TGME49_254190	calcium signaling protein kinase MARK, putative	N/A	1.92807	2.294	7.71435	7.6659	8.78815	9.8819	10.8965	6.58869	6.39693	1.78228
TGME49_258010	calcium signaling protein kinase RAD53, putative	N/A	8.83351	7.9847	8.1412	8.55996	8.85304	8.33548	9.09361	10.8231	9.27124	10.2623
TGME49_207910	calcium/proton exchanger CAX	CAX	9.69604	7.61905	8.51225	8.7557	9.0458	8.75621	8.75428	8.9952	9.83184	9.84707
TGME49_315520	calcium-binding egf domain-containing protein CBDP1	CBDP1	5.35683	10.2256	7.50745	8.49387	8.39669	8.32256	6.98854	4.88236	5.30337	9.88892
TGME49_318540	calcium-binding egf domain-containing protein CBDP2	CBDP2	0.734324	0	0	3.23669	3.38848	5.63475	6.95252	13.3411	14.5704	8.96044
TGME49_269930	calcium-binding egf domain-containing protein CBDP3	CBDP3	6.20203	5.4362	9.25645	9.22431	9.9931	10.0068	11.2479	12.0767	12.2761	9.74893
TGME49_315550	calcium-binding egf domain-containing protein CBDP4	CBDP4	1.31355	0	0	1.30834	1.13762	3.59985	3.86472	9.34012	10.4117	10.9587
TGME49_301440	calcium-dependent protein kinase CDPK1	CDPK1	12.6758	11.9139	10.2277	11.1915	11.5376	10.9876	10.5047	9.71432	9.64812	13.0983
TGME49_225490	calcium-dependent protein kinase CDPK2	CDPK2	11.0438	10.9958	9.84792	9.80754	9.92251	9.9098	10.7022	14.2316	15.139	12.9674
TGME49_206590	calcium-dependent protein kinase CDPK2A	CDPK2A	10.573	10.821	10.4743	10.8387	10.8924	10.6187	9.62739	5.7523	6.42989	12.4532
TGME49_242400	calcium-dependent protein kinase CDPK2B	CDPK2B	0.696953	3.49164	6.22426	6.27257	7.75032	8.55532	9.55302	5.83195	7.69899	3.95133
TGME49_305860	calcium-dependent protein kinase CDPK3	CDPK3	10.7845	10.6751	11.0109	11.505	11.7976	11.5721	11.2104	10.2281	10.3571	12.3543
TGME49_237890	calcium-dependent protein kinase CDPK4	CDPK4	8.89781	9.06097	9.897	9.67571	9.6384	9.48271	9.24876	1.31777	1.2241	4.81417
TGME49_295760	calcium-dependent protein kinase CDPK4A	CDPK4A	9.95857	10.8606	8.90037	8.99944	9.04271	9.05631	9.35489	10.9661	10.9695	9.58066
TGME49_240390	calcium-dependent protein kinase CDPK4B	CDPK4B	3.17746	8.6139	6.16012	7.30198	8.55464	8.93277	10.8451	10.1997	9.31439	3.80191
TGME49_224950	calcium-dependent protein kinase CDPK5	CDPK5	10.6532	12.2261	9.1394	9.81114	10.3634	9.92767	8.40484	5.19591	5.02606	8.26376
TGME49_218720	calcium-dependent protein kinase CDPK6	CDPK6	10.9148	9.60711	6.99012	7.65965	8.15068	7.75369	7.61046	5.92211	6.14209	12.002
TGME49_237860	calcium-dependent protein kinase CDPK7A	CDPK7A	9.12606	7.35661	6.01948	6.76828	7.90407	7.71202	9.45988	10.8304	9.83058	10.9826
TGME49_217600	calcium-dependent protein kinase CDPK9	CDPK9	10.3453	9.83364	9.03467	9.24056	9.29768	9.14457	9.0871	12.6673	13.3414	12.4747
TGME49_233770	calcium-translocating P-type ATPase, PMCA-type protein	N/A	10.0774	6.53819	7.88863	8.86935	9.9197	9.88931	11.9825	9.82406	9.63734	7.08286
TGME49_246930	calmodulin CAM1	CAM1	10.4044	11.195	8.36011	8.60427	8.56113	8.48145	7.27698	5.35157	7.06113	7.79404
TGME49_262010	calmodulin CAM2	CAM2	9.59933	10.3998	7.48979	8.40198	8.18259	7.83794	7.30514	8.00495	8.74513	10.3464
TGME49_226040	calmodulin CAM3	CAM3	9.86084	11.4839	7.95702	8.8232	8.5578	8.33664	7.08279	7.08063	10.0181	8.6831
TGME49_249240	calmodulin, putative	N/A	12.4035	13.0781	12.9536	13.0317	12.6447	12.9931	12.7411	13.9046	14.0847	13.5212
TGME49_297680	calmodulin, putative	N/A	0	0	4.66974	5.68725	6.58951	7.49302	8.14247	2.89756	2.36748	2.91786
TGME49_500158	calmodulin-binding protein, putative	N/A	3.79679	7.52387	0	4.62849	6.49075	6.80983	8.12485	3.91962	6.53445	4.30598
TGME49_293820	calpain family cysteine protease domain-containing protein	N/A	10.6861	10.4576	9.60773	9.67103	9.87397	9.78187	10.4012	13.2405	12.8579	10.705
TGME49_500181	calpain family cysteine protease, putative	N/A	1.51331	6.21195	8.12378	8.52977	8.6523	8.58597	8.85503	10.1995	10.6119	8.69476
TGME49_310320	calreticulin family protein	N/A	8.9186	6.74948	8.03272	8.72928	8.60373	8.40272	8.3747	4.40331	3.31869	9.55224
TGME49_253940	CAM Kinase family, incomplete catalytic triad	N/A	10.1481	9.77222	3.75409	6.49032	7.38127	7.62523	9.78965	10.2974	9.79801	11.705
TGME49_306480	CAM kinase, CDPK family	N/A	4.57989	1.13777	8.48505	8.67947	9.27848	8.58912	9.45988	5.05666	4.2149	0.904729
TGME49_315190	CAM kinase, SNF1 family	N/A	9.27823	9.13613	8.11851	8.5015	9.19483	8.81385	7.81915	4.70746	6.8732	10.1262
TGME49_243500	CAM kinase, SNF1/AMK1 family ToxPK1	N/A	2.21266	1.55914	7.13332	7.85989	8.4777	8.95148	10.154	8.54994	9.00638	7.13759
TGME49_215670	cAMP-dependent protein kinase	N/A	0	1.13777	4.90627	6.32959	6.8891	7.28124	9.20842	10.2652	12.1787	6.96458
TGME49_242070	cAMP-dependent protein kinase regulatory subunit 1	PKAR1	12.5972	12.5554	11.349	11.6095	11.674	11.5691	11.9366	14.61	14.4111	13.6754
TGME49_311300	cAMP-dependent protein kinase regulatory subunit 2, putative	PKAR2	1.93911	7.34108	8.32288	9.24081	10.1608	10.7741	11.8516	7.38968	8.85897	3.34948
TGME49_500249	cAMP-dependent protein kinase regulatory subunit, putative	N/A	2.09461	1.13777	5.37031	5.69732	6.73906	7.21262	8.51801	2.32663	4.16645	2.95237
TGME49_226030	cAMP-dependent protein kinase subunit PKAc1	PKAC1	11.5948	11.6255	10.5816	11.1102	10.8217	10.7763	10.9615	8.26993	8.44002	12.0058
TGME49_228420	cAMP-dependent protein kinase subunit PKAc2	PKAC2	0.655405	2.16846	7.87105	9.14299	9.85497	10.5542	11.331	6.4889	7.71372	8.32701
TGME49_286470	cAMP-dependent protein kinase subunit PKAc3	PKAC3	10.9602	11.2797	10.6518	10.764	10.318	10.4698	9.68431	5.97808	6.84919	10.7868
TGME49_237450	CAP domain-containing protein	N/A	6.69721	5.28688	7.1748	7.67709	7.71801	7.53574	6.35027	3.14112	2.62124	8.15656
TGME49_288220	CAP domain-containing protein	N/A	6.12882	8.07673	2.91132	7.32488	7.99382	9.07091	11.3397	16.5646	16.8409	11.2717
TGME49_500394	CAP domain-containing protein	AP2X6	2.13597	6.38968	4.58777	7.00515	7.83207	8.97046	11.1203	16.6619	16.8437	10.3477
TGME49_285220	CAP-Gly domain-containing protein	N/A	9.21799	10.7602	9.18014	9.1281	9.0089	9.30157	9.03946	8.02975	7.87791	8.48156
TGME49_305060	CAP-Gly domain-containing protein	N/A	10.4593	10.732	9.83271	9.87264	9.96535	10.1415	10.2797	12.1613	12.4384	10.4134
TGME49_215260	carbamoylphosphate synthetase	N/A	9.98502	9.42996	11.1243	11.0933	11.1421	10.897	10.2642	5.39039	5.92121	4.6669
TGME49_258160	carbohydrate kinase	N/A	8.40386	9.7482	9.23046	9.1583	9.33526	9.58618	10.7353	14.4014	15.1905	12.286
TGME49_259950	carbonate dehydratase, eukaryotic-type domain-containing protein	N/A	9.56924	9.302	9.05603	9.3305	9.50182	9.51855	9.74159	3.3304	4.13184	5.36581
TGME49_297070	carbonic anhydrase-related protein CARP	CARP	13.5665	12.5633	9.85145	10.3376	10.1091	9.85636	8.83962	4.26781	8.69126	9.42042
TGME49_290890	carbonyl reductase 1, putative	N/A	9.62091	10.6033	10.6003	10.5388	10.9173	10.9231	12.3386	12.547	12.7451	14.5747
TGME49_293810	carboxyvinyl-carboxyphosphonate phosphorylmutase	N/A	9.21495	12.0294	9.56644	9.41328	9.80875	10.142	10.996	13.6313	13.859	10.4159
TGME49_202880	carrier superfamily protein	N/A	7.54308	3.65423	8.09351	7.6353	8.19959	8.1679	10.0703	10.5728	9.65718	7.41201
TGME49_208560	carrier superfamily protein	N/A	11.0438	10.8539	10.6327	10.4074	10.1867	10.3032	9.98771	4.46646	4.61133	8.48482
TGME49_218770	carrier superfamily protein	N/A	7.2979	8.25922	7.9109	7.6995	7.54917	7.71351	7.13346	9.65927	10.0399	8.07665
TGME49_235650	carrier superfamily protein	N/A	4.2838	6.9913	7.55531	8.1376	8.84189	9.06135	10.7558	12.8808	13.2225	10.4417
TGME49_239080	carrier superfamily protein	N/A	7.25095	6.2064	6.95497	7.66981	7.78858	7.57124	7.53186	6.59681	6.06623	6.94734
TGME49_248320	carrier superfamily protein	N/A	8.99932	9.69312	9.26069	9.55599	9.12756	9.37161	8.47453	4.65242	5.2261	9.63546
TGME49_248950	carrier superfamily protein	N/A	8.55505	8.22096	8.15349	8.09698	7.96339	7.9154	7.53244	4.77501	3.80416	7.48989
TGME49_314710	carrier superfamily protein	N/A	9.6797	10.0445	10.2985	9.74857	9.49913	9.74098	9.31813	7.9889	9.35404	7.97009
TGME49_500437	CASC1 domain-containing protein	N/A	3.10888	2.16846	0	4.30485	5.98902	6.33616	7.64848	9.58623	9.83107	2.64093
TGME49_240640	casein kinase I	N/A	11.7897	11.6445	12.0061	12.0033	11.9729	11.9741	11.9666	13.984	14.7746	11.9356
TGME49_247710	casein kinase I	N/A	9.70922	8.87059	8.90592	8.92338	9.16503	9.17867	9.68183	12.6367	13.2189	10.4931
TGME49_289320	casein kinase I, putative	N/A	10.9604	9.48515	10.3884	10.3378	10.4459	10.2362	10.5103	12.3155	13.2324	10.3599
TGME49_272400	casein kinase ii regulatory subunit protein	N/A	10.6317	10.8573	11.2586	10.8303	10.5884	10.7531	10.358	11.1921	10.3293	10.8649
TGME49_232250	catalase	N/A	13.1612	13.9279	7.95886	9.08221	9.65546	10.099	12.1314	15.6706	15.8035	15.1823
TGME49_249670	cathepsin B	N/A	11.7953	12.7933	9.44681	9.733	10.2834	10.2605	12.3886	16.4722	17.0194	13.8069
TGME49_289620	cathepsin CPC1	CPC1	11.5663	11.7952	10.3508	10.6474	10.8302	10.4682	9.32116	4.63427	5.57678	12.6069
TGME49_276130	cathepsin CPC2	CPC2	10.3385	8.39983	8.62238	8.93932	8.80722	8.55877	8.70462	9.44312	9.74766	7.19985
TGME49_267490	cathepsin CPC3, putative	CPC3	0.734324	3.92627	0	0	0.978136	2.12564	3.35671	15.2952	16.8918	8.82781
TGME49_321530	cathepsin CPL	CPL	11.7686	12.3078	9.79439	10.4152	11.0739	10.8557	12.7984	16.3035	16.6645	15.0584
TGME49_304450	cation-transporting ATPase	N/A	0	5.28694	5.03841	5.34754	4.93455	5.33324	5.89532	14.9091	16.1163	10.2707
TGME49_224190	cation-transporting atpase family protein	N/A	10.0269	8.45549	9.90322	9.75119	9.90813	9.93218	10.3604	8.49071	7.79009	9.11829
TGME49_219260	cation-transporting ATPase, putative	N/A	10.1471	8.81768	9.37539	9.105	9.29708	9.07526	9.12747	8.76263	8.81984	8.75791
TGME49_313990	CBF/Mak21 family protein	N/A	8.20249	7.69004	9.0631	9.26321	9.32885	8.90851	8.41559	7.02629	6.29327	5.23403
TGME49_319658	CBF/Mak21 family protein	N/A	7.99269	6.03788	8.75859	8.88266	8.75492	8.71778	8.33628	7.99599	8.3381	6.19763
TGME49_211350	CBS domain-containing protein	N/A	9.59784	6.80884	9.65726	9.05916	9.1648	9.1893	9.03393	5.45586	4.3795	9.70484
TGME49_307580	CBS domain-containing protein	N/A	10.1302	10.8902	9.49334	9.23803	9.33484	9.33238	9.5586	11.6747	12.6856	10.3108
TGME49_500008	CCCH-type zinc finger protein, putative	N/A	0.801972	1.82339	6.25702	6.98485	7.88619	8.91885	11.4279	16.8849	17.4959	10.6215
TGME49_228300	CCDC25 protein	N/A	8.41443	8.64068	9.67068	9.50508	9.05708	9.32297	8.73067	9.93564	9.40971	10.2255
TGME49_260240	ccr4-associated factor family protein	N/A	11.9056	11.5177	11.3931	11.3337	11.2964	11.2766	11.1112	12.0109	11.8782	12.1202
TGME49_291140	CCR4-Not complex component, Not1 protein	N/A	11.209	10.8308	10.8802	10.891	11.0178	10.7855	10.882	11.9427	11.8478	10.4627
TGME49_239410	CCR4-NOT transcription complex subunit 4, putative	N/A	10.4991	9.09316	10.1266	10.1074	10.399	10.2851	11.4623	15.0315	14.6563	10.2999
TGME49_258980	CCR4-NOT transcription complex subunit 9, putative	N/A	9.41927	7.72559	9.21966	9.23148	9.27053	9.13886	9.28127	9.45032	8.66536	8.88102
TGME49_205440	CCT chaperonin gamma subunit	N/A	11.3682	11.7	12.7307	12.572	12.0973	12.323	12.0474	11.8521	11.249	9.54469
TGME49_217010	CD2BP2-like protein	N/A	8.75834	9.05329	9.22571	9.06529	9.10956	8.94363	9.16524	9.32372	8.29635	10.9638
TGME49_310630	CDK5 regulatory subunit-associated protein 3, putative	N/A	9.58099	8.6471	9.72612	9.63187	9.47886	9.58918	9.74285	10.9655	10.3409	9.08765
TGME49_320070	CDK-activating kinase assembly factor MAT1 protein	N/A	9.28922	9.81683	10.2424	9.93769	9.60679	9.81061	9.57716	9.35109	8.95043	9.10234
TGME49_304970	CDK-related protein kinase CRK1	CRK1	10.037	9.43313	9.86039	9.85042	10.1385	9.92892	10.7239	12.8873	13.0341	10.0498
TGME49_218220	CDK-related protein kinase CRK2	CRK2	11.3754	11.2996	10.7546	10.7588	10.6143	10.7825	10.2452	8.74113	9.83693	10.9305
TGME49_249260	CDK-related protein kinase CRK3	CRK3	10.0847	8.32624	9.61024	9.51655	9.67444	9.47435	9.32904	4.57483	3.72382	9.68983
TGME49_256070	CDK-related protein kinase CRK4	CRK4	9.97236	9.41392	9.89105	9.76305	9.55511	9.68798	10.0439	12.3179	13.0028	8.87764
TGME49_229020	CDK-related protein kinase CRK5	CRK5	10.0947	9.83693	10.1421	10.1291	10.045	9.95951	10.3112	9.0627	8.42571	7.91643
TGME49_254630	CDK-related protein kinase CRK6	CRK6	10.4121	9.87777	10.4998	10.1604	9.88282	10.1401	10.0208	10.4202	10.1003	8.29363
TGME49_254540	CDP-alcohol phosphatidyltransferase superfamily protein	N/A	8.35582	6.79182	7.43494	7.5939	7.95409	7.64749	9.03843	12.3522	12.1854	8.73462
TGME49_257510	CDP-alcohol phosphatidyltransferase superfamily protein	N/A	11.2351	10.5493	10.3237	10.259	10.2343	10.2259	10.6527	10.5959	10.8297	11.0446
TGME49_261760	CDP-alcohol phosphatidyltransferase superfamily protein	N/A	10.4956	9.89888	10.6847	10.1854	10.0343	10.2769	10.5391	13.8673	14.9374	11.3273
TGME49_203260	cell cycle checkpoint protein RAD17, putative	N/A	8.37101	8.29544	8.54737	7.72287	8.09796	7.96625	8.68646	10.4439	10.0434	7.45711
TGME49_221490	cell cycle regulator protein	N/A	8.18893	8.52279	9.65099	9.7044	9.31947	9.66761	9.33788	12.6935	13.4828	8.83568
TGME49_247380	cell division control protein CDC50, putative	N/A	8.32669	6.90686	8.11504	8.5194	8.49435	8.17399	8.17185	8.72198	7.95404	9.0022
TGME49_230820	cell division control protein CDC50.1	N/A	11.3497	11.7082	5.66753	5.96906	6.52663	7.44157	8.72839	10.1785	10.3561	12.0687
TGME49_232040	cell division control protein CDC50.2	N/A	7.25263	3.20909	9.11877	9.27902	9.35884	9.25394	8.49614	0.425737	1.05935	4.32872
TGME49_239540	cell division control protein CDC50.3	N/A	10.0965	10.5007	9.73451	9.51896	9.59281	9.74339	9.97451	11.4875	12.0588	8.56677
TGME49_316620	cell division cycle protein CDC20, putative	CDC20	9.1935	8.0861	7.84699	8.13265	8.39275	8.08548	8.48477	10.2456	10.0577	8.13864
TGME49_230710	cell division protein CDC48	CDC48	7.80919	7.59794	9.08987	8.59028	8.5272	8.56675	7.5025	0	0.918415	7.83709
TGME49_321640	cell division protein CDC48AP	CDC48AP	9.07894	8.51251	8.99201	8.50164	8.392	8.39208	8.04729	5.40196	5.56264	5.39205
TGME49_273090	cell division protein CDC48CY	CDC48CY	12.8809	11.7244	12.3054	12.3042	12.4231	12.1806	12.7119	12.4282	12.3641	9.07049
TGME49_224480	cell-cycle-associated protein kinase CLK, putative	N/A	9.63658	9.01124	9.57178	9.54205	9.75911	9.51915	10.2917	13.1697	13.3833	8.67265
TGME49_204280	cell-cycle-associated protein kinase DYRK1	DYRK1	10.1383	9.18151	8.713	9.30904	9.41858	9.23213	9.54944	10.2319	9.77738	9.51362
TGME49_283480	cell-cycle-associated protein kinase DYRK2, putative	N/A	0	0	6.17513	7.03007	8.41356	9.2107	10.4836	11.0543	12.1556	4.97711
TGME49_265330	cell-cycle-associated protein kinase GSK, putative	N/A	11.8277	12.3065	10.8777	10.8032	10.7304	11.2946	11.9293	14.7896	16.0858	12.7608
TGME49_266910	cell-cycle-associated protein kinase GSK, putative	N/A	8.5353	11.294	3.10361	4.13568	3.99575	4.73479	5.85501	15.4969	16.4654	11.522
TGME49_253440	cell-cycle-associated protein kinase SRPK, putative	N/A	11.9463	11.1776	11.6435	11.7767	11.9022	11.7113	12.315	13.9397	13.6174	11.6944
TGME49_281450	cell-cycle-associated protein kinase, putative	CRK8	9.50822	8.88111	9.1367	9.02348	8.78779	8.94534	8.72255	8.18819	7.91585	6.67784
TGME49_320430	cell-cycle-control protein (translation regulation), putative	N/A	9.72715	9.00353	10.5969	10.2869	10.3114	10.3212	10.0237	10.1575	9.02459	10.2806
TGME49_247230	centrin 1	CEN1	9.57348	10.0704	10.3167	10.2921	10.0775	10.3748	10.7262	7.77766	7.72103	8.74547
TGME49_250340	centrin 2	CEN2	11.1841	11.236	10.6811	10.6605	10.5751	10.9327	11.0959	12.9803	13.8315	11.242
TGME49_260670	centrin 3	CEN3	9.89877	9.08737	9.26224	9.19804	9.12635	9.10192	9.54239	11.9055	12.5653	10.3884
TGME49_237490	centrin family protein	N/A	4.0385	6.79192	7.82385	8.95191	9.41639	9.53763	10.6875	6.8686	6.43119	2.49702
TGME49_274000	centrin-binding protein SFI1	SFI1	9.38183	8.05057	8.15349	8.2084	8.72885	8.16614	8.97786	11.5223	11.0518	7.73323
TGME49_213040	centromere protein CENP-C	CENPC	9.24263	7.7798	8.84604	8.84852	8.9667	8.8325	9.07199	7.8558	8.31292	8.76409
TGME49_211430	centrosomal protein CEP110, putative	CEP110	4.29976	5.693	6.46141	6.67891	7.50027	8.03831	8.99209	5.70499	6.40096	5.61884
TGME49_285210	centrosomal protein CEP120, putative	CEP120	9.61988	9.12486	8.89174	8.73875	8.72229	8.6514	8.8712	9.51346	9.04562	8.13493
TGME49_205590	centrosomal protein CEP131	CEP131	1.45738	4.53386	4.59051	5.7725	7.363	7.83019	8.98042	7.49607	7.90709	4.59099
TGME49_201790	centrosomal protein CEP170, putative	CEP170	9.50471	10.0255	9.1796	9.32603	9.24627	9.21756	9.02446	10.7516	10.0484	10.6001
TGME49_212880	centrosomal protein CEP250	CEP250	10.2495	9.09847	9.39992	9.10453	9.65624	9.53247	10.336	12.4122	12.9065	9.2603
TGME49_290620	centrosomal protein CEP250L1	CEP250L1	10.8471	10.1091	10.6572	10.0062	10.2586	10.2957	10.7023	12.9234	13.31	7.01217
TGME49_313790	centrosomal protein CEP44, putative	CEP44	9.2886	8.73875	8.74482	8.74823	8.90958	9.08294	10.3234	14.0114	14.914	8.80446
TGME49_233940	centrosomal protein CEP72, putative	CEP72	0.696953	4.49903	5.14244	8.63991	8.67561	9.01882	9.72631	4.24581	4.57534	3.86676
TGME49_226610	centrosomal protein CEP76, putative	CEP76	3.51594	6.50229	7.10263	7.97378	8.19684	8.49495	9.26055	6.25438	6.78495	6.86657
TGME49_246190	centrosome protein CEP530	CEP530	8.89344	8.02189	6.24325	7.07323	8.02983	8.18385	8.95269	6.11279	5.8119	3.55654
TGME49_283710	ceramide synthase CERS1, putative	CERS1	11.5582	10.0381	10.57	10.3758	10.2118	10.2938	10.2988	9.16026	8.62094	6.6053
TGME49_316450	ceramide synthase CERS2, putative	CERS2	9.44141	10.0884	10.3077	9.8912	9.62908	9.91004	10.4242	14.0435	14.7428	10.4877
TGME49_500335	CFAP53 domain-containing protein	N/A	1.02917	2.01636	6.8717	7.43772	8.46373	9.18724	10.0487	3.67927	4.42252	1.79233
TGME49_500169	CFAP99 domain-containing protein	N/A	1.75143	6.096	5.06382	6.28248	7.07601	7.3592	8.46208	7.50304	7.6124	6.38576
TGME49_293170	CH domain-containing protein	N/A	10.585	9.19025	8.78103	8.41646	8.42348	8.42928	7.75935	5.74029	8.60072	7.1256
TGME49_262140	chain a, pp2a-specific methylesterase apo form (pme), putative	N/A	9.97171	9.1851	9.18115	9.3034	9.87532	9.55226	10.3938	10.4132	9.8559	10.9155
TGME49_302000	chaperone clp, putative	N/A	1.26287	0	0	0	0.912468	1.04759	0.533357	0.865023	3.38034	1.27389
TGME49_257990	chaperone protein ClpB1	ClpB1	10.726	11.4328	8.63386	8.87377	9.3008	9.62333	11.4358	10.9111	10.4445	11.3183
TGME49_268650	chaperone protein ClpB2	ClpB2	7.86705	11.4372	9.31517	9.26905	9.15533	9.49342	9.77291	12.4961	12.7806	11.4946
TGME49_275690	chaperone protein ClpB3	ClpB3	10.6234	11.2296	11.0829	10.9421	10.6612	10.7101	9.95405	6.51951	7.78009	10.3961
TGME49_282200	chaperone protein ClpB4, putative	ClpB4	2.40639	2.57642	9.74152	10.8181	11.0634	10.8123	9.23526	2.90952	3.88763	5.50459
TGME49_202580	chaperone protein ClpB5, putative	ClpB5	9.34822	3.87791	10.7883	10.9476	10.8786	10.7269	10.0525	8.44944	8.4875	9.54081
TGME49_240600	chaperonin cpn60, putative	N/A	11.6583	11.9732	12.4203	12.1568	11.686	12.059	11.1881	3.13483	5.08367	4.6332
TGME49_273960	chaperonin GroS protein	N/A	11.0906	10.2772	10.5821	10.7274	10.4347	10.3729	10.0948	11.8093	12.3591	11.6173
TGME49_311720	chaperonin protein BiP	N/A	14.788	14.5279	15.2317	15.1015	14.9312	15.0266	15.1717	12.0788	12.1348	12.2463
TGME49_263530	chaperonin, putative	N/A	10.6679	10.9285	11.8027	11.9422	11.6835	11.698	11.5908	5.69197	6.92722	10.3687
TGME49_230150	ChAPs (Chs5p-Arf1p-binding proteins) protein	N/A	9.59151	8.27461	9.3276	9.14919	9.13432	9.26598	9.2315	7.21317	6.6703	9.32928
TGME49_213940	CHCH domain-containing protein	N/A	11.6784	11.882	11.8833	12.4157	12.3685	12.0715	12.3111	14.9222	15.3552	12.4409
TGME49_206390	checkpoint protein HUS1, putative	N/A	8.25603	10.0525	9.10505	9.34095	9.17187	9.42274	10.1185	14.0147	14.3599	10.4836
TGME49_293770	chitinase-like protein CLP1	CLP1	10.9022	11.5149	10.1816	10.1383	10.4708	10.2805	8.83516	11.7	12.2136	12.2398
TGME49_230590	chitobiosyldiphosphodolichol beta-mannosyltransferase	N/A	8.55139	8.33427	9.08307	8.77148	8.56397	8.78369	8.9202	9.8169	9.69161	10.7765
TGME49_265500	chloride transporter, chloride channel (ClC) family protein	N/A	9.28856	7.39651	8.33817	8.49244	9.09777	8.94068	9.80573	8.39598	7.51535	7.92657
TGME49_290330	chloride transporter, chloride channel (ClC) family protein	N/A	7.84408	8.36434	8.39592	8.61905	8.69874	8.5846	8.05822	1.03817	0	5.25553
TGME49_313930	chloroquine resistance transporter CRT	CRT	9.56291	10.2441	8.33553	8.66476	8.96673	8.97411	10.1168	14.1998	14.8873	10.5454
TGME49_213840	choline transporter-like protein, putative	N/A	4.05652	6.70512	6.54673	7.52091	8.44372	8.60593	9.65992	7.73216	7.73096	5.83138
TGME49_216930	cholinephosphate cytidylyltransferase	N/A	9.74412	10.3072	10.9104	10.9823	10.4702	10.7543	11.0411	13.7907	14.2152	11.2915
TGME49_320040	CHORD protein	N/A	7.79108	9.5175	9.53644	9.36599	8.77006	9.21115	8.63192	8.48775	9.48812	7.93447
TGME49_201380	chorismate synthase, putative	N/A	11.4296	10.747	9.48285	9.77968	9.66643	9.48794	9.24202	4.15677	4.54835	9.73672
TGME49_269760	'chromo' (CHRromatin Organization MOdifier) domain-containing protein	N/A	7.69549	5.88517	6.95723	6.8187	7.55654	7.0622	8.35906	11.4401	11.4378	7.03025
TGME49_500193	chromo domain-containing protein	N/A	10.6697	10.8044	9.83737	9.76178	9.67764	9.63531	10.2702	11.2223	10.8503	10.3317
TGME49_258240	chromodomain helicase DNA binding protein CHD1/SWI2/SNF2	N/A	11.2706	10.877	11.2273	11.0195	11.0883	11.1807	11.0434	11.3145	10.8471	11.1354
TGME49_218210	Chromosome-associated kinesin KLP1, putative	N/A	4.18244	5.83272	8.27276	9.02514	9.54148	9.87346	10.9183	5.56552	6.47782	3.47595
TGME49_221420	Chromosome-associated kinesin KLP1, putative	N/A	2.70005	6.93415	5.93212	5.85714	7.46211	8.05349	9.24344	6.46171	7.70716	4.78561
TGME49_230440	CHY zinc finger domain-containing protein	N/A	9.19059	9.81302	9.21516	9.31148	9.35922	9.49607	10.3878	14.3818	15.3843	12.1257
TGME49_306040	CHY zinc finger protein	N/A	10.0108	9.94702	9.05312	9.11661	9.0982	8.93396	9.01534	9.58729	8.78629	11.5368
TGME49_278710	cilia- and flagella-associated protein 221, putative	N/A	0	3.36126	5.16057	5.56549	6.29275	6.94516	7.97987	8.5068	9.15589	4.43369
TGME49_500380	cilia- and flagella-associated protein 46, putative	N/A	4.08881	7.47622	5.40847	6.61611	7.91199	8.09282	9.30493	9.70828	10.1215	6.78595
TGME49_500168	cilia- and flagella-associated protein 54, putative	N/A	5.8987	8.13777	5.96875	6.61488	7.97435	7.74882	9.17178	7.85452	7.97653	6.12194
TGME49_500385	cilia- and flagella-associated protein 58, putative	N/A	7.03168	7.04708	8.3921	7.95929	8.37138	8.55194	9.26493	7.75356	7.98655	5.70085
TGME49_500383	cilia- and flagella-associated protein 61, putative	N/A	3.20805	7.25624	5.76322	7.8129	8.69175	8.9052	9.94732	11.0778	12.5828	7.05991
TGME49_500079	cilia- and flagella-associated protein 69, putative	N/A	1.31355	2.01636	5.37807	7.04223	7.49823	7.52734	8.64246	5.9472	5.9246	1.19176
TGME49_268890	citrate synthase I	N/A	10.0848	9.71776	10.5536	10.895	10.8965	10.6759	11.1912	8.91428	8.55011	9.84535
TGME49_203110	citrate synthase, putative	N/A	5.13041	2.77885	8.30204	8.83971	9.37717	9.71163	11.5152	12.4653	13.112	8.21888
TGME49_263130	citrate synthase, putative	N/A	11.6028	11.058	6.85084	8.09618	9.22606	9.61026	12.441	14.5756	15.5169	9.5478
TGME49_268810	ck2 beta subunit	N/A	10.6296	9.93058	10.8078	10.7219	10.4923	10.6069	10.226	4.20319	3.36294	11.1115
TGME49_241130	CKK domain-containing protein	N/A	5.44373	9.61861	5.72208	6.40721	7.53205	7.73197	8.94703	5.63715	7.32687	4.60315
TGME49_212270	CLAMP-linked invasion protein CLIP	CLIP	12.2067	12.6784	4.96829	2.66816	3.10883	3.32153	3.40828	4.35529	6.67759	15.6794
TGME49_312590	CLASP domain-containing protein	N/A	9.68779	8.58318	8.20884	8.82819	9.21651	8.98952	10.082	11.0187	10.6767	7.31036
TGME49_221260	Class-II DAHP synthetase family protein	N/A	8.69469	8.39165	10.5575	10.3427	9.96337	9.89098	9.20587	8.97424	8.77398	7.63742
TGME49_280550	clathrin adaptor complex small chain subfamily protein	N/A	9.55733	8.96161	10.6185	10.1385	10.0155	10.0551	10.2537	7.51846	7.17883	10.4439
TGME49_290950	clathrin heavy chain	CHC1	11.462	11.1059	11.6521	11.4269	11.5458	11.4498	11.6103	13.4291	13.7108	9.58262
TGME49_213030	clathrin light chain, putative	N/A	11.1314	10.7965	11.0292	11.1219	11.094	10.997	11.8032	11.543	12.127	9.66181
TGME49_265790	claudin-like apicomplexan microneme protein	CLAMP	12.0826	11.8202	8.08602	8.80572	9.07221	8.64149	7.54689	9.26794	9.93792	15.5364
TGME49_285200	cleavage and polyadenylation specificity factor subunit 3	CPSF3	8.34774	8.53896	9.13684	9.28898	9.20837	9.24811	8.90816	9.71689	9.52111	8.90845
TGME49_201200	cleavage and polyadenylation specificity factor subunit 4	CPSF4	8.83046	9.23678	8.33353	8.69666	8.65075	8.59994	9.04007	11.9044	12.0685	9.47863
TGME49_313590	CLEC16A domain-containing protein	N/A	8.98615	8.48328	8.53995	8.05774	8.19803	8.19424	8.48477	10.0771	8.96187	10.3368
TGME49_205240	cleft lip and palate transmembrane protein 1 (clptm1) protein	N/A	10.3512	9.5976	10.8954	10.7761	10.6316	10.6303	10.6468	9.90611	9.84056	10.0699
TGME49_299110	cleft lip and palate transmembrane protein 1 (clptm1) protein	N/A	10.4113	8.96118	10.1784	9.87843	9.63674	9.85558	10.0152	9.67576	8.86709	8.32708
TGME49_298010	CLU domain-containing protein	N/A	11.2837	11.0689	7.40213	8.40646	8.412	8.42471	7.61759	9.83273	10.0714	8.28764
TGME49_321360	clustered-asparagine-rich protein	N/A	8.77383	8.62368	9.63088	9.39203	9.06649	9.15349	8.1078	6.72435	7.98834	10.129
TGME49_293850	clusterin-associated protein 1, putative	N/A	2.18198	3.02558	3.14421	4.84007	6.13517	6.58185	7.87977	3.85551	4.56932	10.4868
TGME49_253580	CMGC kinase, CDK family	N/A	1.42525	5.25687	7.58967	8.32425	9.15446	10.2147	12.3231	15.451	14.7293	9.81091
TGME49_263070	CMGC kinase, CK2 family	N/A	10.6873	10.0051	11.0307	10.913	10.786	10.7147	10.3796	6.10751	5.95268	8.89211
TGME49_307640	CMGC kinase, CK2 family	N/A	1.72425	1.13777	10.255	11.1698	11.8106	12.1923	13.9494	13.9382	13.4239	9.33321
TGME49_312570	CMGC kinase, MAPK family (ERK) MAPK-1	MAPKL1	11.3018	10.3506	9.57644	9.65605	9.83692	9.87165	11.6151	15.1207	15.6801	8.92041
TGME49_221550	CMGC kinase, MAPK family, MEK kinase-related (incomplete catalytic triad)	N/A	8.32718	12.5882	7.80503	8.19014	9.22731	9.66978	11.6502	15.3545	16.4305	12.572
TGME49_250850	CMGC kinase, putative	N/A	10.0332	9.10982	9.02028	9.61281	9.91689	9.63082	9.81841	6.54953	6.21306	7.36495
TGME49_259570	CMP/dCMP deaminase, zinc-binding, putative	N/A	7.36128	8.56904	8.45566	8.36867	7.85156	8.09691	7.41572	11.1748	11.5462	10.095
TGME49_305220	C-Myc-binding family protein	N/A	0.227194	0	6.13581	7.1166	7.85796	8.26235	9.36357	3.68986	3.95709	1.06818
TGME49_500054	c-Myc-binding protein, putative	N/A	4.38634	5.48542	4.78372	6.14753	6.87685	7.51371	8.50564	6.15448	6.08589	8.39687
TGME49_244390	coatomer epsilon subunit protein	N/A	10.7775	11.5773	10.8124	10.7373	10.5305	10.7945	11.004	12.9133	13.3104	11.1662
TGME49_273370	coatomer gamma 2-subunit protein, putative	N/A	10.2929	9.84734	10.4038	10.3265	10.3258	10.2921	10.8349	11.6822	12.1672	8.64314
TGME49_240650	coatomer protein complex, subunit alpha, putative	N/A	11.6008	10.856	11.8597	11.6088	11.6177	11.5802	11.9698	8.85374	8.58992	10.3589
TGME49_273990	CobW/P47K family protein	N/A	7.15346	3.20909	7.30079	7.68454	7.66047	7.5115	7.90915	7.33345	6.13903	7.39265
TGME49_265220	co-chaperone GrpE protein	N/A	9.4917	9.47186	10.4252	10.9821	10.6028	10.5765	9.86101	6.52792	6.1766	10.1853
TGME49_249480	co-chaperone UNC	UNC	9.81537	8.62745	8.45793	8.93512	9.05542	8.79369	9.93572	13.2453	12.0758	8.45698
TGME49_275980	coenzyme q (ubiquinone) biosynthesis protein coq4 protein	N/A	8.5267	8.49982	7.58289	8.1585	8.0241	8.05041	8.00228	5.94938	5.03636	9.60464
TGME49_229320	Cof family hydrolase subfamily protein	N/A	3.3677	2.294	8.07596	9.53536	10.0381	11.1065	13.179	17.1926	16.0073	11.5729
TGME49_229330	Cof family hydrolase subfamily protein	N/A	3.0123	2.01636	0.53667	5.16592	5.72767	5.5436	5.46722	8.41621	12.3488	12.0938
TGME49_243910	Cof family hydrolase subfamily protein	N/A	9.87619	10.5841	10.2752	10.0938	9.61892	9.99882	9.59951	12.6285	13.1149	9.34433
TGME49_237260	Coiled-coil domain containing 124 family protein	N/A	9.8975	9.45202	9.76478	9.64846	9.6042	9.52138	9.71676	11.1131	11.4394	11.7095
TGME49_209630	coiled-coil domain-containing protein	N/A	7.66909	7.74514	7.71554	8.10581	7.94124	7.8989	7.66288	9.13178	8.39009	9.63692
TGME49_213700	coiled-coil domain-containing protein	N/A	3.97428	8.24237	5.43524	6.36648	7.28895	7.75495	9.09066	4.36815	3.89093	3.00948
TGME49_220170	coiled-coil domain-containing protein	N/A	8.47936	9.72937	9.16796	8.96708	8.63625	8.76582	7.66765	5.16996	4.77292	11.2141
TGME49_233850	coiled-coil domain-containing protein	N/A	6.8869	7.56269	8.88082	8.82208	8.3151	8.43234	7.68395	2.76842	3.77769	9.37738
TGME49_292935	coiled-coil domain-containing protein	N/A	0.524436	4.6294	5.93329	6.53667	7.61301	8.44358	9.39459	11.076	10.3457	7.77834
TGME49_500206	coiled-coil domain-containing protein	N/A	2.36675	7.68024	5.29634	6.21398	7.52085	8.28998	9.40287	10.747	11.0048	6.42573
TGME49_500211	coiled-coil domain-containing protein 103, putative	N/A	0.297242	0	6.68036	8.19138	8.18803	8.5989	9.61304	5.96916	8.37909	6.08495
TGME49_282030	coiled-coil domain-containing protein 151, putative	N/A	1.55771	1.82339	4.8608	5.53261	6.91084	7.36799	8.75104	11.9734	12.4879	7.55695
TGME49_285770	coiled-coil domain-containing protein 189, putative	N/A	2.28026	6.00292	3.14421	5.80367	6.1832	6.78996	8.02846	2.57156	3.16256	7.62446
TGME49_500270	coiled-coil domain-containing protein 39, putative	N/A	8.90801	7.72559	7.79497	7.32967	8.16382	8.29226	9.18274	3.68075	4.3173	8.44311
TGME49_243560	coiled-coil domain-containing protein 81, putative	N/A	0.538828	0	4.54622	5.39331	6.43136	7.61453	8.48357	6.09933	7.19126	7.62999
TGME49_500070	coiled-coil domain-containing protein, putative	N/A	0	0	4.97102	5.87489	6.74088	7.63953	8.71924	1.93884	3.27175	2.16915
TGME49_267470	cold-shock DNA-binding domain-containing protein	N/A	5.56442	9.52276	11.6018	12.0123	12.5425	12.7777	14.3496	17.223	16.8831	13.5866
TGME49_320600	cold-shock DNA-binding domain-containing protein	N/A	12.1987	13.4252	14.0167	14.1262	13.6087	13.6966	12.8742	8.26971	8.93586	12.1567
TGME49_322700	collagen, putative	N/A	1.83612	2.4009	3.52476	4.7348	6.10591	6.74229	7.2168	0	0.540102	0
TGME49_288930	condensin complex subunit 2, putative	N/A	10.0278	9.11434	8.88249	8.67307	8.66475	8.46158	9.37334	11.53	10.775	8.94437
TGME49_212940	condensin-2 complex subunit H2, putative	N/A	8.00584	6.39884	7.64876	7.52617	7.45685	7.26913	7.70575	7.8814	6.81065	7.71447
TGME49_210810	conoid associated protein CAP1	CAP1	10.2182	12.6777	10.2644	10.3279	10.1048	10.5365	10.4835	13.7195	13.3578	11.3884
TGME49_240380	conoid gliding protein CGP	CGP	11.6874	11.2994	9.79963	9.27893	9.24108	9.38265	8.48897	6.02288	9.86839	10.7747
TGME49_266630	conoid protein hub CPH1	CPH1	10.4696	10.4042	8.63144	9.39104	9.33878	9.18213	8.18743	8.57149	9.63246	10.7216
TGME49_267500	conserved basal apical peripheral protein CBAP	CBAP	11.6588	12.0543	9.53908	10.2438	10.0846	9.84147	8.88946	8.3853	10.6289	11.3483
TGME49_290310	conserved oligomeric Golgi complex subunit 1	COG1	8.51656	7.69365	8.23287	8.44307	8.56276	8.50967	9.13399	9.00436	7.7642	6.67864
TGME49_273580	conserved oligomeric Golgi complex subunit 2	COG2	8.87542	9.18232	8.96608	8.90581	8.7772	8.75864	8.99736	9.3399	8.45021	8.52502
TGME49_306410	conserved oligomeric Golgi complex subunit 3	COG3	8.7156	8.15808	8.40563	8.17319	8.1436	8.10764	8.42156	9.1505	8.84883	8.23286
TGME49_212150	conserved oligomeric Golgi complex subunit 4	COG4	9.61767	9.09866	8.69885	8.70643	8.65767	8.65676	9.02446	7.75674	8.06496	7.84326
TGME49_251730	conserved oligomeric Golgi complex subunit 5	COG5	9.13867	8.59085	9.61373	9.13379	9.09702	9.21927	9.32385	6.24858	4.87495	5.95138
TGME49_224150	conserved oligomeric Golgi complex subunit 6	COG6	7.67368	6.93031	7.53943	7.65078	7.69767	7.53146	7.79466	6.99067	6.84401	5.88183
TGME49_242030	conserved oligomeric Golgi complex subunit 7	COG7	8.89474	7.60717	8.04683	8.28819	8.3797	8.05785	8.24918	6.98776	6.03273	7.08369
TGME49_240540	conserved oligomeric Golgi complex subunit 8	COG8	10.5003	11.1063	9.90872	10.0587	9.677	9.98812	9.81745	11.2391	11.816	10.8226
TGME49_225450	COP9 signalosome complex subunit 3, putative	N/A	8.59111	8.53896	9.06103	8.32332	8.13611	8.35213	8.16288	11.2685	12.1751	7.94023
TGME49_231110	COPI associated protein	N/A	0.755736	1.82339	7.321	8.6084	9.15404	9.81851	11.5239	15.306	15.6877	9.70102
TGME49_260500	COPI associated protein, putative	N/A	12.5659	12.2019	12.1647	12.2368	11.9715	12.0783	11.8785	12.6398	13.3537	9.09586
TGME49_235020	COPI protein, putative	N/A	11.2395	10.2403	11.6612	11.3266	11.383	11.3984	11.8378	10.6678	10.3879	9.78876
TGME49_500391	copper amine oxidase, putative	N/A	3.22266	0	12.4725	13.3975	14.1916	14.1931	16.0943	9.71338	9.20161	5.20076
TGME49_240550	copper chaperone COX17-1, putative	N/A	9.04586	10.4249	9.64453	9.49928	9.02035	9.35556	8.78849	10.7796	10.8619	7.35487
TGME49_223020	coproporphyrinogen III oxidase	N/A	9.24808	9.4139	10.3238	10.2493	9.62	9.70068	8.58256	4.35407	5.45954	7.82048
TGME49_235402	CorA family Mg2+ transporter protein	N/A	7.64855	6.18961	7.42487	7.30149	7.34436	7.33793	6.47762	1.49567	4.74838	8.51215
TGME49_273970	CorA family Mg2+ transporter protein	N/A	8.9656	9.58405	7.70981	8.27448	8.25063	7.87611	6.87401	5.79207	8.01932	6.25114
TGME49_305190	CorA family Mg2+ transporter protein	N/A	9.69446	10.1922	8.13665	8.24601	8.28041	8.23809	8.46299	8.02809	6.41501	9.77099
TGME49_309240	CorA family Mg2+ transporter protein	N/A	8.5191	7.23855	7.18397	7.73208	7.98091	7.3325	7.1304	10.0237	9.03594	9.3793
TGME49_216970	coronin, putative	N/A	11.4168	12.0232	10.3625	10.5301	10.4954	10.2323	9.18052	7.98956	8.72002	12.8462
TGME49_254260	COX19 cytochrome c oxidase assembly family protein	N/A	7.60178	7.89613	8.33698	8.31394	8.09399	8.16008	8.0173	10.3471	9.62608	9.13563
TGME49_500285	CPBP intramembrane metalloprotease, putative	N/A	9.44362	9.41577	11.117	10.9376	10.5744	10.697	11.1975	12.5078	12.6778	11.7212
TGME49_234250	CPH1-interacting protein CIP1	CIP1	11.077	10.8633	8.53449	8.40093	8.69227	8.19116	7.59552	5.29891	6.80086	7.85985
TGME49_257300	CPH1-interacting protein CIP2	CIP2	10.2618	8.99293	8.02346	8.73243	9.0804	8.52048	8.40896	7.72085	7.43414	11.3843
TGME49_225020	CPH1-interacting protein CIP3	CIP3	10.1543	8.93466	8.06328	8.81307	8.73594	8.05147	7.58436	4.56542	6.49165	6.86667
TGME49_224280	CPSF A subunit region protein	N/A	9.22251	8.2531	9.32538	9.27687	9.33526	9.17003	9.1729	10.3601	9.14945	7.2733
TGME49_267710	CPSF A subunit region protein	N/A	9.88915	9.53235	10.0577	9.74875	9.73784	9.70683	9.9247	9.87958	9.05725	9.80729
TGME49_203375	cpw-wpc domain-containing protein	N/A	0.227194	0	0	0	0	0.78545	0.376507	13.2194	14.9477	6.94982
TGME49_206440	cpw-wpc domain-containing protein	N/A	1.64577	6.88513	0.783977	0.431376	0.485498	1.59869	0.200501	12.9434	14.3584	8.82709
TGME49_216875	cpw-wpc domain-containing protein	N/A	0.297242	0	0	0	0.709815	1.38604	0.103731	14.1472	15.6964	7.99507
TGME49_240480	cpw-wpc domain-containing protein	N/A	0.538828	0	0	2.06694	1.52578	1.93582	2.87512	13.2856	15.0865	7.06518
TGME49_247310	cpw-wpc domain-containing protein	N/A	0	0	1.06774	2.10849	2.74553	2.45739	0.200501	14.0924	15.627	7.28763
TGME49_263245	cpw-wpc domain-containing protein	N/A	0	0	0	0.431376	0.42697	1.08103	0.674813	12.8653	14.4887	6.16107
TGME49_266770	cpw-wpc domain-containing protein	N/A	0	3.92627	0	3.03942	3.15832	2.88039	0	15.3554	17.0472	8.98056
TGME49_278690	cpw-wpc domain-containing protein	N/A	0	0	0	0.431376	2.10256	2.64547	4.08351	14.0198	15.7314	8.01345
TGME49_318500	cpw-wpc domain-containing protein	N/A	2.95199	2.16846	1.47599	3.28535	3.08265	3.17147	2.04651	13.9014	15.3762	7.11293
TGME49_202410	CRAL/TRIO domain-containing protein	N/A	9.45148	9.46073	8.90875	9.03362	9.37216	9.47998	10.7896	14.0288	13.3449	10.1987
TGME49_203390	CRAL/TRIO domain-containing protein	N/A	10.5535	9.77594	8.4403	9.27045	9.45971	9.00194	8.44243	5.57052	2.93635	10.5566
TGME49_213790	CRAL/TRIO domain-containing protein	N/A	9.65534	7.82227	8.12304	8.70857	9.0373	8.98509	9.66999	8.65101	7.74921	6.34375
TGME49_246330	CRAL/TRIO domain-containing protein	N/A	10.1544	9.49123	10.4697	10.4167	10.2706	10.5337	10.6706	13.189	12.624	10.6385
TGME49_254390	CRAL/TRIO domain-containing protein	N/A	10.5459	10.1391	9.9471	9.84698	10.0918	9.91218	9.91169	6.94605	7.1004	10.1174
TGME49_254890	CRAL/TRIO domain-containing protein	N/A	4.96977	8.16664	9.60295	10.0788	10.0447	10.4957	9.55646	7.66506	7.92168	3.44139
TGME49_269390	CRAL/TRIO domain-containing protein	N/A	9.78466	9.56103	8.57351	8.79002	8.84734	8.80249	9.47915	12.0133	11.9177	10.6326
TGME49_310802	CRAL/TRIO domain-containing protein	N/A	9.33051	8.77089	9.26566	9.37244	9.3674	9.48083	9.72948	12.7777	13.0341	10.7325
TGME49_500119	CRAL/TRIO domain-containing protein, putative	N/A	4.0213	2.294	7.82734	8.03846	7.81591	7.81169	6.82837	0.865023	2.78599	1.60622
TGME49_221340	CRAL-TRIO domain-containing protein	N/A	8.1897	8.80583	9.28967	9.17214	9.10819	9.13151	8.62975	6.57467	7.0244	3.80083
TGME49_297180	CRAL-TRIO domain-containing protein	N/A	11.2543	9.26439	7.9878	8.69703	9.22554	8.66559	8.98531	8.54087	7.48735	10.6299
TGME49_269750	CrcB family protein	N/A	9.29975	9.6494	8.07157	8.4729	8.37534	8.8936	10.0436	13.2765	13.9289	8.85865
TGME49_250350	CRIPT, putative	N/A	9.75936	10.9893	9.57367	9.5954	9.3711	9.6577	9.76539	11.9452	12.565	12.189
TGME49_269200	crooked neck family 1 protein isoform 2, putative	N/A	9.34505	8.82454	9.51879	9.72519	9.52325	9.53944	9.29349	10.4806	10.1961	10.457
TGME49_261610	crossover junction endonuclease MUS81, putative	MUS81	7.70471	8.10475	7.25894	7.29015	7.40251	7.59208	7.86046	8.64154	9.60617	8.88852
TGME49_228730	CRT domain-containing protein	N/A	8.99807	8.55091	7.61428	7.8191	8.30171	8.14794	9.38142	9.82079	8.77637	8.90935
TGME49_290730	CS domain-containing protein	N/A	9.91874	8.37355	10.0032	9.45898	9.29776	9.68163	9.68875	9.60735	9.09561	9.05704
TGME49_293860	CS domain-containing protein	N/A	8.95712	10.2788	11.2806	11.1996	10.7721	11.0349	10.9125	6.2239	6.20552	11.2842
TGME49_305020	CS domain-containing protein	N/A	8.88164	9.01821	9.07491	8.75138	8.77961	8.70223	8.02227	1.08112	0.98675	4.77117
TGME49_265390	CTLH domain-containing protein	N/A	10.1674	10.8824	6.99674	7.02355	7.67777	8.05076	8.92153	12.6506	13.3996	11.2102
TGME49_299210	CTP synthase	CTPS	10.5715	9.03359	10.797	11.0941	10.8918	10.5659	10.0934	4.13734	3.99588	8.85242
TGME49_221350	Ctr copper transporter family protein	N/A	8.85603	9.87309	9.57786	9.15883	9.15886	9.30942	9.59479	10.2877	9.87975	9.09497
TGME49_249200	Ctr copper transporter family protein	N/A	12.2289	12.333	10.1642	9.89229	9.40003	9.58517	9.26405	4.76985	5.77891	11.0498
TGME49_262710	Ctr copper transporter family protein	N/A	12.0539	13.4361	11.0365	10.9231	10.5655	10.5788	9.9322	5.3988	6.30115	9.05319
TGME49_201770	cullin 3, putative	N/A	9.33049	8.99011	9.23831	9.5545	9.82383	9.91623	10.9518	14.0081	14.3392	9.39115
TGME49_289310	cullin family protein	N/A	10.0548	9.08874	9.93422	9.82058	9.84768	9.83545	10.2947	7.97196	7.33259	7.348
TGME49_316660	cullin family protein	N/A	10.104	10.9059	9.98231	9.67404	9.61498	9.60586	9.6688	11.2373	11.016	11.1715
TGME49_285445	cullin, putative	N/A	5.37709	7.19742	7.81968	8.3961	9.33702	9.51689	11.1806	9.55485	8.9563	7.63265
TGME49_270740	Cwf15/Cwc15 cell cycle control protein	N/A	8.41914	7.87552	9.4322	9.23495	8.89364	9.07036	8.95139	10.5878	10.0673	10.2038
TGME49_279430	cwf18 pre-mRNA splicing factor protein	N/A	8.97121	10.2968	9.50232	9.64552	8.98937	9.39576	8.46269	11.2986	11.5379	8.79244
TGME49_282140	cwf21 protein	N/A	9.2997	10.4429	10.8017	10.3503	10.3636	10.7625	11.5308	15.277	15.4767	12.4178
TGME49_235350	cwfj family protein	N/A	8.60179	8.57743	8.10618	8.5666	8.52999	8.30988	9.03208	12.7025	13.4683	9.96306
TGME49_221200	CW-type Zinc Finger protein	N/A	9.69484	9.91437	10.3028	9.88568	10.1208	10.1167	9.48741	8.23181	7.18548	7.13839
TGME49_232370	CW-type Zinc Finger protein	N/A	10.1498	9.2904	10.2095	10.093	9.98669	9.89839	10.0019	11.1311	10.7926	9.96959
TGME49_310030	cyclase-associated protein CAP	CAP	11.6957	12.7978	11.0241	11.4562	11.4306	11.6359	10.5704	12.8661	13.1922	11.6329
TGME49_204440	cyclic nucleotide-binding domain-containing protein	N/A	8.35667	8.90872	8.6809	8.09818	8.56393	8.4002	9.22523	6.93727	7.57267	9.10045
TGME49_219070	cyclic nucleotide-binding domain-containing protein	N/A	11.0038	10.1163	6.49721	8.24247	8.53871	8.19443	7.23047	6.40137	8.97459	11.8219
TGME49_500022	cyclic nucleotide-binding domain-containing protein	N/A	0.906841	1.82339	5.10428	5.90354	6.90785	7.74372	9.07877	10.5786	10.2944	5.79724
TGME49_264690	cyclin 4, putative	N/A	9.38964	9.38015	9.01753	9.09822	9.05107	8.93635	9.69122	9.45965	9.39356	10.0279
TGME49_229200	cyclin CYC1	CYC1	9.39988	9.10367	8.2665	8.49442	8.58742	8.48588	9.54095	13.4985	13.5802	5.47523
TGME49_290020	cyclin dependent kinase binding protein	N/A	9.02519	8.81143	8.38778	8.36641	8.30065	8.24551	8.18226	7.90692	7.19822	9.21779
TGME49_260250	cyclin domain protein, cyclin H family protein	N/A	9.03829	8.99363	9.02158	9.09383	8.84787	8.95354	9.20733	9.33564	9.93455	9.58252
TGME49_293280	cyclin protein	N/A	6.8119	9.37916	9.00541	9.29373	9.75018	9.16455	8.55366	7.88125	7.77923	6.83183
TGME49_266900	cyclin, N-terminal domain-containing protein	N/A	10.6724	13.6302	3.47848	2.33192	2.82817	3.9208	4.55085	11.0562	11.9378	10.2573
TGME49_305330	cyclin, N-terminal domain-containing protein	N/A	12.7106	11.7179	10.346	10.3583	10.5139	10.0692	10.1736	6.31955	7.18814	7.90221
TGME49_244890	cyclin, putative	N/A	0	2.71047	5.3928	6.42274	7.49821	7.70661	9.15471	11.4717	11.5081	6.47789
TGME49_267580	cyclin2 related protein	N/A	10.3395	8.7181	8.40507	8.60975	9.19285	8.21791	8.4384	5.56758	6.36901	8.84851
TGME49_239910	cyclin-dependent kinase	N/A	7.73015	7.351	8.16843	8.39724	9.01947	8.90755	10.5492	12.4169	11.7011	6.18028
TGME49_270330	cyclin-dependent kinase CDK7	CDK7	9.50675	9.63113	9.09225	9.23702	8.96823	9.10832	8.62349	3.11292	1.77978	7.088
TGME49_285160	cyclin-dependent kinase family 5 protein	N/A	3.84213	8.23487	5.76235	5.63997	7.22873	7.33402	8.65425	12.2871	13.8703	9.08987
TGME49_219100	cyclin-dependent kinase regulatory subunit protein	N/A	8.84894	9.34559	9.89635	9.73231	9.44983	9.84421	10.2611	14.3211	14.5735	8.45572
TGME49_220440	cyclin-dependent kinase regulatory subunit protein	N/A	9.04332	8.52542	9.25858	9.06096	8.92207	9.13465	9.1628	9.17393	10.2248	4.58609
TGME49_223120	cyclin-dependent kinase regulatory subunit protein	N/A	1.20834	4.87893	5.49119	7.3449	7.88341	8.89683	10.7168	15.792	16.1518	10.0385
TGME49_500221	cyclin-dependent kinase regulatory subunit protein	N/A	6.5652	6.96103	6.15606	7.13871	7.94034	8.54639	10.7125	14.9493	15.0405	9.44082
TGME49_221210	cyclophilin	N/A	12.7402	12.835	13.6543	13.4236	13.0855	13.3186	13.0855	11.3954	11.1724	8.23305
TGME49_230520	cyclophilin 1, putative	N/A	10.0853	11.021	11.9485	11.7825	11.0894	11.4343	10.2149	2.92796	3.91868	2.74883
TGME49_205700	cyclophilin precursor	N/A	13.3687	14.4771	15.1861	15.0146	14.3199	14.635	13.6636	4.55197	4.89905	11.6227
TGME49_229940	cyclophilin, putative	N/A	9.60592	8.99363	9.48699	9.44216	9.34503	9.59029	9.80284	11.0488	10.665	10.2196
TGME49_262520	cyclophilin, putative	N/A	7.98198	7.8363	8.51444	8.34315	8.20405	8.40969	8.03093	8.23647	8.38351	8.37032
TGME49_289250	cyclophilin, putative	N/A	8.75464	9.77013	9.72219	9.64677	9.29684	9.58149	9.23365	12.931	13.4621	11.0235
TGME49_209755	cyst matrix protein MAG2	MAG2	12.4025	15.6669	3.10361	2.50227	1.37298	0.944542	0.533357	6.23671	7.43782	6.46882
TGME49_312330	cyst wall protein CST10	N/A	8.51208	8.34205	8.05586	7.79933	7.83265	7.72448	7.03603	10.0389	11.4702	9.56579
TGME49_258870	cyst wall protein CST7	CST7	12.5633	12.9786	4.66852	2.88362	3.34368	4.1179	5.30258	10.143	10.4653	15.0316
TGME49_310790	cyst wall protein CST9	CST9	11.7622	12.566	12.1035	12.1232	11.7073	11.7507	10.9781	1.55668	3.03301	13.2851
TGME49_312930	cystathione gamma lyase	CGL	1.89675	4.26961	9.45377	10.1851	10.3605	10.3966	11.8335	11.2191	11.2695	5.70925
TGME49_259180	cystathionine beta-synthase	CBS	0	1.82339	7.15896	8.22671	9.0079	9.73167	11.9087	16.6625	17.1037	11.8305
TGME49_216170	cysteine desulfurase NFS2	NFS2	9.13724	9.63077	9.22329	8.79227	8.66861	8.80931	8.39145	8.08983	8.91424	10.6864
TGME49_300350	cysteine desulfurase/selenocysteine lyase family PLP dependent transferase superfamily protein	N/A	8.74679	8.88573	9.33415	9.43152	9.58371	9.51037	10.3776	11.652	11.4143	8.30955
TGME49_500241	cysteine dioxygenase, putative	N/A	7.22708	10.4193	8.40931	8.88851	9.63305	9.87243	11.5536	14.5642	15.1914	13.5309
TGME49_261080	cysteine repeat modular protein CRMPA	CRMPA	10.8258	10.9292	9.74819	9.19274	9.23293	9.22826	8.36886	8.65572	9.50921	12.1343
TGME49_292020	cysteine repeat modular protein CRMPB	CRMPB	9.67262	9.78708	9.37494	8.54649	8.57415	8.64914	7.65276	3.75251	7.57245	10.3588
TGME49_299810	cysteine-tRNA synthetase (CysRS)	N/A	10.9795	10.9992	11.6724	11.4377	11.2204	11.3388	11.3363	9.38371	9.20778	9.17483
TGME49_200430	cytidine and deoxycytidylate deaminase zinc-binding region domain-containing protein	N/A	8.52822	5.4362	8.36685	8.25587	8.19993	8.32979	8.33328	8.33547	8.6917	5.53519
TGME49_215750	cytidine and deoxycytidylate deaminase zinc-binding region domain-containing protein	N/A	7.03841	3.45402	7.51972	7.92531	7.90202	7.7248	7.1064	4.97864	3.95706	7.11426
TGME49_239630	cytidine and deoxycytidylate deaminase zinc-binding region domain-containing protein	N/A	8.61934	8.64911	9.26129	9.29967	9.02933	9.13204	8.17558	8.92795	8.40557	9.91017
TGME49_330000	cytochrome b	N/A	6.64258	9.30526	10.0407	10.129	9.06079	9.93818	8.78435	5.72233	5.75701	5.42412
TGME49_255060	cytochrome b(N-terminal)/b6/petB subfamily protein	N/A	7.05798	8.6912	10.1517	10.6386	9.2086	10.221	9.23222	7.82045	7.249	3.54044
TGME49_237130	cytochrome b, putative	N/A	8.54984	10.5357	11.1933	11.125	10.263	11.201	10.8876	9.95143	9.93664	7.5482
TGME49_240770	cytochrome b5 family heme/steroid binding domain-containing protein	N/A	4.97201	6.88688	5.1233	6.70655	7.46218	7.2807	7.9666	1.36455	1.29212	1.76684
TGME49_276110	cytochrome b5 family heme/steroid binding domain-containing protein	N/A	9.22472	8.55403	10.5908	10.4145	10.1105	10.2996	9.9061	0.726571	0.84547	2.90856
TGME49_313580	cytochrome b5 family heme/steroid binding domain-containing protein	N/A	8.2063	6.03876	7.94685	7.37192	7.1719	7.22401	6.82363	5.89087	5.11793	9.20491
TGME49_236210	cytochrome b-c1 complex subunit 1	QCR1	11.4221	10.1226	12.2693	12.4858	12.503	12.1596	12.1494	8.64303	7.56945	9.76132
TGME49_214250	cytochrome b-c1 complex subunit 11	QCR11	10.9531	10.9677	11.9042	12.0765	11.794	11.6591	11.5363	12.0249	12.1774	11.4193
TGME49_207170	cytochrome b-c1 complex subunit 12	QCR12	10.6761	10.8259	11.4163	11.5799	11.2577	11.2562	11.076	5.02659	5.7601	10.4147
TGME49_202680	cytochrome b-c1 complex subunit 2	QCR2	11.5237	10.5935	12.6158	12.6934	12.6887	12.4501	12.4821	12.631	11.9974	11.0216
TGME49_320140	cytochrome b-c1 complex subunit 6, putative	QCR6	11.0484	10.647	12.2933	12.2292	11.8969	12.0682	11.785	11.3371	11.9983	10.5791
TGME49_288750	cytochrome b-c1 complex subunit 7, putative	QCR7	11.3487	10.8852	12.0722	12.2506	12.0495	11.967	11.9924	10.5856	10.4567	8.99943
TGME49_227910	cytochrome b-c1 complex subunit 8	QCR8	11.0769	11.4135	11.8018	11.8981	11.5209	11.6022	11.2907	9.31537	9.66282	11.2802
TGME49_201880	cytochrome b-c1 complex subunit 9	QCR9	10.9742	11.2923	12.165	12.1333	11.6954	11.8852	11.5043	11.0937	10.9454	10.4332
TGME49_320220	cytochrome b-c1 complex subunit Rieske, putative	N/A	11.7571	10.8195	12.2484	12.3167	12.2966	12.0943	12.0401	6.39416	6.10651	8.37034
TGME49_228180	cytochrome C oxidase assembly factor COX15, putative	N/A	9.61236	10.3821	9.99379	9.95728	9.42721	9.56676	8.58368	6.90949	7.99791	9.09887
TGME49_202800	cytochrome c oxidase assembly protein COX11 protein, putative	N/A	7.7646	5.68113	8.98097	8.76703	8.70479	8.67407	8.47695	8.21482	9.16729	4.43755
TGME49_248660	cytochrome c oxidase assembly protein COX14, putative	COX14	8.68917	9.14253	9.75253	9.26851	8.80189	9.23687	8.41149	8.75867	9.55275	9.64899
TGME49_286070	cytochrome c oxidase assembly protein PET191, putative	N/A	7.91614	9.27513	8.28436	7.97572	7.99835	7.98102	7.73128	9.60627	10.246	10.7018
TGME49_306390	cytochrome c oxidase subunit 6B, putative	N/A	10.6461	11.8908	11.949	11.8743	11.6922	11.7754	11.565	9.87394	9.10632	11.6285
TGME49_500203	cytochrome c oxidase subunit 6B, putative	N/A	7.94845	9.56602	8.17311	8.53626	8.23912	8.57876	6.95166	8.98756	9.33188	9.67341
TGME49_254030	cytochrome c oxidase subunit ApiCOX13	ApiCOX13	10.5788	10.5239	11.6264	11.6611	11.2795	11.4308	10.8543	6.36531	5.92742	7.27267
TGME49_242840	cytochrome c oxidase subunit ApiCOX14	ApiCOX14	11.8563	12.0502	12.1259	12.1951	11.977	11.8776	11.8042	4.42487	4.38904	10.7226
TGME49_265370	cytochrome c oxidase subunit ApiCOX16	ApiCOX16	11.3039	11.7276	12.1353	12.1244	11.8571	11.9794	11.7517	7.34757	7.05223	12.1426
TGME49_221510	cytochrome c oxidase subunit ApiCOX18	ApiCOX18	10.9358	10.1532	11.7191	11.8904	11.6133	11.6294	11.5252	12.7559	13.4288	10.5497
TGME49_247770	cytochrome c oxidase subunit ApiCOX19	ApiCOX19	11.0635	11.9381	12.7682	12.6052	12.1702	12.4288	12.0608	13.4195	14.1426	11.5003
TGME49_262640	cytochrome c oxidase subunit ApiCOX23	ApiCOX23	11.2564	11.8162	12.751	12.5775	12.1421	12.2768	11.9105	9.8674	9.62919	7.69552
TGME49_286530	cytochrome c oxidase subunit ApiCOX24	ApiCOX24	11.5731	12.6795	12.7674	12.7067	12.3254	12.5608	12.0844	11.2785	11.7841	12.5033
TGME49_264040	cytochrome c oxidase subunit ApiCOX25	ApiCOX25	11.375	11.9851	12.6484	12.43	11.9917	12.1456	11.8108	9.38996	9.37897	7.68467
TGME49_306670	cytochrome c oxidase subunit ApiCOX26	ApiCOX26	11.426	12.5462	12.7013	12.5692	12.2093	12.4605	12.2892	14.2143	14.7151	13.1101
TGME49_297810	cytochrome c oxidase subunit ApiCOX30	ApiCOX30	11.3502	12.5193	12.1539	12.1998	11.9267	12.0172	11.7285	12.6586	12.7613	9.59951
TGME49_229920	cytochrome c oxidase subunit ApiCOX35	ApiCOX35	11.7135	11.7652	12.5286	12.5377	12.1911	12.2809	11.8974	12.6205	12.9454	10.0338
TGME49_226590	cytochrome c oxidase subunit COX2a	COX2a	12.0128	12.1555	12.9656	12.6734	12.3529	12.5706	12.0953	10.5217	10.6037	6.75697
TGME49_310470	cytochrome c oxidase subunit COX2b	COX2b	11.6471	11.3195	12.1948	12.2461	11.9001	11.9139	11.7176	9.72335	10.1842	11.5261
TGME49_209260	cytochrome c oxidase subunit COX5b	COX5b	11.5974	11.8824	12.8079	12.7419	12.2865	12.355	11.9669	9.37489	9.45906	9.69671
TGME49_322600	cytochrome c oxidase subunit iii subfamily protein	N/A	6.9612	4.78287	8.29847	9.16195	7.6895	8.95912	8.23569	6.96886	7.14477	3.66066
TGME49_323400	cytochrome c oxidase subunit iii subfamily protein	N/A	7.58921	10.4497	9.95664	10.0942	9.41913	10.363	9.38754	7.88311	7.62734	5.71285
TGME49_219750	cytochrome c, putative	N/A	11.1048	11.0026	12.9642	13.2107	12.7717	12.8011	11.9598	9.26836	9.98846	12.3711
TGME49_229420	cytochrome c, putative	N/A	8.78112	9.72405	11.3413	11.3363	10.8568	11.2057	10.6338	8.82193	8.40802	12.1416
TGME49_314042	cytochrome c1 heme lyase, putative	N/A	8.21996	8.7194	9.35127	9.08164	8.79911	9.1221	9.09813	9.53414	9.76438	8.99651
TGME49_246540	cytochrome c1, heme protein	N/A	11.3623	9.80954	12.8918	12.9026	12.6132	12.4807	12.242	2.24521	2.87843	2.85455
TGME49_293390	cytochrome C-type heme lyase, putative	N/A	7.36972	5.72586	8.64744	8.88955	8.79187	8.68407	8.28927	5.87086	5.39217	12.0789
TGME49_315770	cytochrome p450	CYP450mt	11.1007	11.6392	6.48027	6.84113	7.67731	8.3377	10.3331	15.0966	15.6942	12.7304
TGME49_216900	cytokine induced apoptosis inhibitor 1 family protein	N/A	9.61477	9.60232	9.87372	10.2231	9.79661	9.9087	9.39905	12.6695	13.4799	12.1238
TGME49_277510	cytoplasmic dynein intermediate chain	N/A	10.2002	9.45254	9.20576	9.26467	9.53287	9.35864	10.1714	13.3039	13.5727	10.1992
TGME49_315950	cytoskeleton salvaging RING family member 1	CSAR1	11.3597	9.51806	8.3756	9.39908	9.92155	9.29289	10.5156	11.9449	11.8452	8.06548
TGME49_280730	cytosolic fe-s cluster assembling factor nbp35, putative	N/A	9.14195	9.49244	9.15679	9.18696	8.94358	9.1108	9.17736	12.337	13.4591	10.3698
TGME49_219540	cytosolic tRNA-Ala synthetase	N/A	11.8175	10.3751	11.2229	11.034	10.7851	10.632	10.1225	1.89066	1.26053	8.12095
TGME49_239820	D-3-phosphoglycerate dehydrogenase	N/A	13.7738	13.6388	10.4119	10.6238	11.3273	11.4967	13.1472	14.0032	14.2336	14.5939
TGME49_305870	DAD family protein	N/A	8.14497	9.13344	9.59256	9.43882	9.15971	9.43845	9.42494	9.46786	9.71303	11.3289
TGME49_233860	DALR anticodon binding domain-containing protein	N/A	8.08561	8.36489	8.03553	8.23493	7.98745	8.00056	7.36639	7.42649	8.17811	4.25835
TGME49_313600	DDHD domain-containing protein	N/A	9.75571	9.64034	9.12352	9.12265	9.28153	8.9829	9.12342	8.74538	8.71499	9.48348
TGME49_250330	DDRGK domain-containing protein	N/A	9.99117	10.0336	10.7474	10.1681	9.9079	10.2802	10.0567	12.3588	12.8621	10.7791
TGME49_236650	DEAD (Asp-Glu-Ala-Asp) box polypeptide 17	DDX17	12.6445	13.2766	12.9804	13.0595	12.7524	12.6836	12.3184	14.2142	14.8728	12.9793
TGME49_210360	DEAD (Asp-Glu-Ala-Asp) box polypeptide 41 family protein	N/A	9.14779	9.46864	9.28288	8.92557	8.94102	8.88636	8.52533	9.41397	9.96767	10.6888
TGME49_216860	DEAD (Asp-Glu-Ala-Asp) box polypeptide DDX39	DDX39	12.7157	13.0441	13.629	13.5111	13.1362	13.3354	12.788	10.1956	10.308	13.218
TGME49_226250	DEAD (Asp-Glu-Ala-Asp) box polypeptide DDX3X	DDX3X	11.764	10.8311	11.7735	12.0205	12.053	11.8274	11.8254	11.9603	12.0548	11.9939
TGME49_313010	DEAD (Asp-Glu-Ala-Asp) box polypeptide DDX6	DDX6	11.7067	11.4676	11.7587	11.7332	11.5086	11.6928	11.2235	7.20549	5.99635	11.9253
TGME49_312990	DEAD/DEAH box ATP-dependent RNA helicase	N/A	8.61122	10.0406	10.5583	10.6172	10.1515	10.4143	9.18625	1.71917	4.85099	11.1285
TGME49_220860	DEAD/DEAH box helicase	N/A	10.1884	10.1319	10.4508	10.3313	10.0732	10.3024	10.4829	11.6518	12.4014	10.8868
TGME49_203220	DEAD/DEAH box helicase domain-containing protein	N/A	9.09943	8.90038	9.31688	9.2868	9.1239	9.0563	8.65292	7.14454	5.78833	9.34222
TGME49_203840	DEAD/DEAH box helicase domain-containing protein	N/A	8.35871	7.01469	8.04902	8.74589	8.83747	8.71835	8.85015	10.7686	10.1573	7.44998
TGME49_205540	DEAD/DEAH box helicase domain-containing protein	N/A	8.87763	8.50286	8.93451	9.30216	9.52529	8.97258	8.61364	5.76223	7.0863	9.0502
TGME49_208540	DEAD/DEAH box helicase domain-containing protein	N/A	8.30714	8.29764	8.52718	8.74147	8.82029	8.5192	8.1039	7.65856	6.25029	8.74311
TGME49_208842	DEAD/DEAH box helicase domain-containing protein	N/A	11.3021	10.6334	9.81348	9.12342	9.06425	9.1517	8.84641	1.03817	2.53691	5.33306
TGME49_211400	DEAD/DEAH box helicase domain-containing protein	N/A	7.70372	7.68532	8.27983	8.60678	8.42941	8.5091	7.6361	4.47084	3.50857	7.52665
TGME49_221660	DEAD/DEAH box helicase domain-containing protein	N/A	9.39292	8.29958	10.6004	10.2734	10.1999	10.3194	10.0098	8.50679	8.06376	9.4563
TGME49_222140	DEAD/DEAH box helicase domain-containing protein	N/A	8.77398	7.47478	8.20341	8.77449	8.4906	8.42942	7.71038	6.73096	7.11516	8.11449
TGME49_223440	DEAD/DEAH box helicase domain-containing protein	N/A	8.66242	8.60246	8.95278	8.69425	8.82495	8.86779	9.28662	12.3417	12.7583	9.40039
TGME49_226090	DEAD/DEAH box helicase domain-containing protein	N/A	8.25013	7.23855	8.63307	7.95945	7.87894	7.75668	7.24827	5.07022	4.2105	2.56858
TGME49_241140	DEAD/DEAH box helicase domain-containing protein	N/A	8.61743	8.70583	8.5056	8.09958	8.16011	8.11045	7.38645	4.8523	3.89193	9.43716
TGME49_242055	DEAD/DEAH box helicase domain-containing protein	N/A	8.2072	6.29548	7.21488	7.61246	7.74314	7.82571	7.7825	9.27711	8.47986	4.60989
TGME49_244000	DEAD/DEAH box helicase domain-containing protein	N/A	8.90552	9.15336	9.15629	9.68244	9.49932	9.5417	8.50386	4.98436	4.19828	9.6887
TGME49_251480	DEAD/DEAH box helicase domain-containing protein	N/A	7.66729	5.99438	8.94813	8.70087	8.77903	8.47186	7.8729	8.57176	8.27359	5.71342
TGME49_253090	DEAD/DEAH box helicase domain-containing protein	N/A	8.05188	7.5805	7.55836	8.47244	8.45966	8.21213	7.64955	7.54315	7.86064	8.44245
TGME49_256900	DEAD/DEAH box helicase domain-containing protein	N/A	8.19143	7.42962	8.47048	8.42361	8.65358	8.44787	7.94013	7.34671	6.50706	8.22881
TGME49_259220	DEAD/DEAH box helicase domain-containing protein	N/A	8.97996	8.87211	9.82198	10.0258	9.88466	9.87846	8.89512	6.92574	6.9508	7.60578
TGME49_260450	DEAD/DEAH box helicase domain-containing protein	N/A	7.66886	8.16655	7.98795	7.76451	7.76107	7.92683	7.67134	9.46204	9.58078	8.07098
TGME49_263820	DEAD/DEAH box helicase domain-containing protein	N/A	8.54541	8.36489	10.2996	10.1527	10.2965	10.0859	9.64254	6.13009	6.5263	6.00462
TGME49_264160	DEAD/DEAH box helicase domain-containing protein	N/A	8.50184	8.13889	7.89449	8.13248	8.06119	8.14438	7.82817	6.04094	6.04425	9.02394
TGME49_266110	DEAD/DEAH box helicase domain-containing protein	N/A	8.03147	7.62988	8.41398	8.3413	8.02791	7.93454	7.41824	5.71167	5.23871	10.506
TGME49_268290	DEAD/DEAH box helicase domain-containing protein	N/A	8.73853	7.71053	7.58602	8.4667	8.4424	8.03033	7.81677	8.39158	7.59748	8.28251
TGME49_270620	DEAD/DEAH box helicase domain-containing protein	N/A	8.04595	7.69933	8.57237	9.22201	8.99352	8.9192	8.07348	6.77869	6.27339	7.30947
TGME49_285660	DEAD/DEAH box helicase domain-containing protein	N/A	9.13272	7.87552	9.05924	9.40669	9.59405	9.34625	9.85568	12.6583	12.7421	9.63232
TGME49_291670	DEAD/DEAH box helicase domain-containing protein	N/A	7.7105	8.71947	8.6647	8.70475	8.14566	8.30796	7.54516	1.92023	4.1159	5.85708
TGME49_294350	DEAD/DEAH box helicase domain-containing protein	N/A	10.5901	9.77067	11.1705	10.9744	11.1738	11.0581	11.2163	10.4588	9.59661	8.7707
TGME49_295010	DEAD/DEAH box helicase domain-containing protein	N/A	7.09307	7.88008	8.22591	8.31489	8.07421	8.21608	7.39989	6.23442	5.94098	7.54023
TGME49_309570	DEAD/DEAH box helicase domain-containing protein	N/A	8.63484	7.37128	8.88913	9.44377	9.72767	9.23707	8.92397	4.67285	2.7113	2.51104
TGME49_316750	DEAD/DEAH box helicase domain-containing protein	N/A	8.36973	7.69437	8.59309	8.55693	8.49075	8.50853	8.57863	9.11055	8.25065	7.87436
TGME49_279330	DEAD/DEAH box helicase family protein	N/A	8.47232	8.93328	9.6397	9.71091	9.63491	9.73967	9.99257	12.1172	11.7185	7.60765
TGME49_500202	DEAD/DEAH box helicase, putative	N/A	8.60263	8.52539	9.49666	8.94217	8.84811	8.88762	8.47725	3.88642	2.9877	5.80363
TGME49_500307	DEAD/DEAH box helicase, putative	N/A	9.46639	9.78812	10.4209	10.1416	10.2746	10.5845	8.29064	4.33521	5.1171	9.12063
TGME49_219200	DEAD/DEAH box RNA helicase family protein	N/A	9.26419	9.20542	10.5017	10.3118	10.1028	10.0728	9.13629	7.43321	6.65787	11.4218
TGME49_298020	DEAD-family helicase	N/A	10.0815	9.46838	10.5391	10.343	10.3086	10.2403	10.1062	4.89097	5.23871	10.9699
TGME49_270250	dense granule protein GRA1	GRA1	16.836	17.0244	7.48031	6.43702	5.07508	3.03571	3.97826	8.7992	9.52196	18.4773
TGME49_268900	dense granule protein GRA10	GRA10	9.1179	9.64504	9.27273	9.82688	9.93511	9.64785	10.2026	11.7676	11.2026	11.8341
TGME49_212410	dense granule protein GRA11A	GRA11A	4.17861	3.17593	11.3516	11.7557	12.1924	11.7281	10.877	1.52124	2.93285	3.50464
TGME49_237800	dense granule protein GRA11B	GRA11B	1.72425	2.71747	12.157	12.578	12.9057	12.4442	12.0664	3.5083	5.15259	4.64588
TGME49_288650	dense granule protein GRA12	GRA12	14.364	14.951	6.68912	6.0178	5.24545	4.38294	3.105	6.7221	7.83356	16.3548
TGME49_220890	dense granule protein GRA12A	GRA12A	9.75376	10.8975	1.83896	2.39235	3.32208	3.35335	3.06701	5.93435	6.17956	12.2441
TGME49_275860	dense granule protein GRA12B	GRA12B	11.8835	11.1864	3.40212	4.59281	3.41742	3.18308	1.35925	3.99178	8.29591	13.787
TGME49_275850	dense granule protein GRA12C	GRA12C	2.44193	1.55914	11.6381	11.9424	12.1444	11.5047	11.0758	0.865023	2.92002	7.44589
TGME49_308970	dense granule protein GRA12D	GRA12D	12.3237	11.6504	8.44737	8.74932	8.80991	8.96406	9.91169	8.54397	8.55989	11.8087
TGME49_237880	dense granule protein GRA13	GRA13	12.9648	12.0193	12.0356	11.6036	11.5585	11.4134	11.2468	1.92141	0	3.9394
TGME49_239740	dense granule protein GRA14	GRA14	12.9164	13.0696	8.12542	8.45103	8.92915	9.02758	10.5699	7.48513	7.9968	15.977
TGME49_275470	dense granule protein GRA15	GRA15	10.266	2.98253	2.58601	2.92384	2.91487	2.74635	2.43253	3.51889	7.7378	11.7905
TGME49_208830	dense granule protein GRA16	GRA16	11.0636	8.89177	2.74881	2.10849	2.87765	3.54641	3.9507	0.865023	0	9.67701
TGME49_222170	dense granule protein GRA17	GRA17	11.3961	10.9063	13.2563	13.557	13.3335	13.2925	12.6027	10.2276	10.8445	7.75858
TGME49_288840	dense granule protein GRA18	GRA18	9.71	8.9918	2.21231	7.37362	7.17911	4.56871	1.96621	6.00745	6.78698	10.8269
TGME49_245432	dense granule protein GRA19	GRA19	10.0838	12.3579	1.06774	3.83435	4.57046	4.73338	5.61059	8.86832	8.9789	8.38463
TGME49_227620	dense granule protein GRA2	GRA2	15.8078	16.0483	4.97744	5.41479	4.23523	2.29908	2.30774	4.91643	5.34174	14.384
TGME49_200010	dense granule protein GRA20	GRA20	11.1379	11.6095	0	1.30834	0.282846	0.494733	0.977561	4.13734	4.81191	11.3704
TGME49_241610	dense granule protein GRA21	GRA21	9.85281	9.10943	7.26364	7.64201	8.62572	7.84335	8.59624	2.31619	2.53374	9.8136
TGME49_215220	dense granule protein GRA22	GRA22	12.9452	12.5154	3.77009	3.04603	2.41117	2.14521	2.98787	8.06993	7.93874	13.6078
TGME49_297880	dense granule protein GRA23	GRA23	12.2544	11.3701	13.9017	14.1623	13.4933	13.9727	12.9229	5.75995	6.13244	4.43113
TGME49_230180	dense granule protein GRA24	GRA24	12.0579	4.93109	7.42632	8.30638	8.99789	9.22825	11.6955	14.613	15.1361	14.7319
TGME49_290700	dense granule protein GRA25	GRA25	11.5835	12.1151	3.31495	4.24593	4.57757	4.58834	3.87941	2.5804	1.30965	14.8838
TGME49_231960	dense granule protein GRA28	GRA28	10.1162	8.55091	6.21509	6.95075	8.01176	8.08345	10.066	12.9351	13.1363	13.287
TGME49_269690	dense granule protein GRA29	GRA29	11.4035	11.6055	10.4612	10.8103	11.0807	10.7992	9.62739	3.18101	4.22861	8.04075
TGME49_227280	dense granule protein GRA3	GRA3	15.287	15.3599	4.61608	6.14012	6.56667	4.39117	2.98787	5.57304	5.47966	10.7464
TGME49_232000	dense granule protein GRA30	GRA30	11.662	12.2645	10.8297	10.7845	10.6674	10.804	10.7894	3.50929	3.3172	12.7391
TGME49_220240	dense granule protein GRA31	GRA31	11.6073	11.1001	1.06774	2.216	1.75905	1.21535	0.200501	0	1.80105	8.66961
TGME49_212300	dense granule protein GRA32	GRA32	12.0316	11.8329	10.5624	10.683	10.516	10.6074	10.1989	3.01692	2.92002	13.1286
TGME49_247440	dense granule protein GRA33	GRA33	12.6966	13.4047	2.83077	2.16524	2.04663	1.2866	3.12979	6.62246	11.7535	9.41179
TGME49_203290	dense granule protein GRA34	GRA34	12.7734	14.713	6.40789	4.60892	4.27531	4.73544	3.80441	4.25305	4.32233	6.1337
TGME49_226380	dense granule protein GRA35	GRA35	11.6626	11.8891	3.18458	2.92384	3.6877	3.21021	4.87423	4.70109	6.72111	15.8443
TGME49_213067	dense granule protein GRA36	GRA36	11.1299	12.5743	5.43517	5.02398	4.51255	4.43169	4.62682	11.5924	12.3498	8.47081
TGME49_236890	dense granule protein GRA37	GRA37	10.9918	11.5655	7.2959	7.27598	7.20579	8.09001	8.29716	11.5019	11.5514	13.5687
TGME49_312420	dense granule protein GRA38	GRA38	11.5058	10.3236	9.5751	9.46075	9.67886	9.38149	9.14068	1.67279	1.85043	11.8391
TGME49_289380	dense granule protein GRA39	GRA39	12.3424	10.9172	11.117	11.0346	10.9324	10.8706	10.2621	6.26241	6.68008	6.70021
TGME49_310780	dense granule protein GRA4	GRA4	13.9323	13.0259	3.86196	3.96457	3.00851	2.86657	2.47183	4.55614	4.73178	15.0474
TGME49_219810	dense granule protein GRA40	GRA40	11.6805	11.3602	8.54924	9.32129	9.8682	9.11795	8.09763	3.43009	3.74083	10.6061
TGME49_500312	dense granule protein GRA41	GRA41	11.1135	11.3099	0.783977	2.02753	0.709815	1.41563	1.22767	7.28566	7.79846	14.4123
TGME49_236870	dense granule protein GRA42	GRA42	11.7911	12.948	2.17618	1.89059	1.57624	2.75336	1.88118	12.4475	12.8176	14.4229
TGME49_237015	dense granule protein GRA43	GRA43	11.8065	12.8541	6.40149	6.57918	6.50134	6.67239	6.2279	8.17475	7.60972	15.1146
TGME49_228170	dense granule protein GRA44	GRA44	11.8599	12.1026	8.05482	8.60776	8.89575	8.8074	8.98764	6.7331	7.55518	14.585
TGME49_316250	dense granule protein GRA45	GRA45	11.6489	11.5667	7.77711	8.56198	8.39127	8.49511	8.61144	10.2038	9.97935	13.4099
TGME49_208370	dense granule protein GRA46	GRA46	11.5386	13.5055	7.93676	7.36786	7.9235	7.01309	6.8685	6.57308	7.88924	14.125
TGME49_254000	dense granule protein GRA47	GRA47	9.65453	9.63077	8.15166	8.70159	9.18514	8.72509	9.20295	13.1048	13.5261	11.9698
TGME49_267740	dense granule protein GRA48	GRA48	10.5803	12.7268	0.783977	2.96267	2.4684	3.66302	2.68752	5.73476	7.00962	13.0366
TGME49_244530	dense granule protein GRA49	GRA49	11.4702	9.01562	12.106	12.1476	12.5401	12.5388	13.1634	2.1327	3.03301	9.13352
TGME49_286450	dense granule protein GRA5	GRA5	15.9134	15.3717	7.63544	6.51074	6.15109	5.92859	6.59797	8.23562	9.08135	17.8355
TGME49_203600	dense granule protein GRA50	GRA50	10.8975	11.1122	12.8759	13.0052	12.5704	12.9649	12.0782	7.16406	7.96423	6.71328
TGME49_230705	dense granule protein GRA51	GRA51	12.0638	10.4442	2.74881	2.62917	0.693367	0.967022	0.674813	0	2.86057	8.73845
TGME49_319340	dense granule protein GRA52	GRA52	12.7938	12.9715	11.8919	11.7719	11.4617	11.6938	11.0485	10.1179	11.0182	11.0344
TGME49_260520	dense granule protein GRA53	N/A	11.4208	12.2192	10.496	10.5431	10.5155	10.4798	9.74071	5.87115	7.20178	11.4082
TGME49_204340	dense granule protein GRA54	GRA54	12.1217	12.4873	3.12932	4.03032	3.48023	2.64984	1.99348	7.41063	8.30876	13.7359
TGME49_309760	dense granule protein GRA55	GRA55	11.6859	12.6902	1.59698	3.99525	3.65139	4.24957	4.16969	8.31215	8.77523	13.8088
TGME49_309930	dense granule protein GRA56	GRA56	12.4961	14.1651	3.75409	3.41511	3.60986	3.7811	5.3053	8.97634	8.98101	6.63354
TGME49_217680	dense granule protein GRA57	GRA57	12.1126	11.9023	10.0553	9.81637	10.0133	10.0824	9.51751	2.89708	3.71803	12.0999
TGME49_268790	dense granule protein GRA58	GRA58	12.3611	13.8585	7.80406	7.22724	6.91351	7.18369	6.57221	10.1208	10.3298	7.91928
TGME49_313440	dense granule protein GRA59	GRA59	6.42926	11.802	4.48583	4.66021	5.1269	5.72523	6.58683	10.8871	11.2437	13.614
TGME49_275440	dense granule protein GRA6	GRA6	15.3848	15.2594	4.64861	4.95915	3.18188	2.61968	2.91844	6.69625	7.81457	17.3399
TGME49_204270	dense granule protein GRA60	GRA60	8.84146	5.58236	8.25235	8.4146	8.6655	8.19899	9.14277	9.50435	9.93475	4.14074
TGME49_269950	dense granule protein GRA61	GRA61	12.4514	10.5802	10.4952	10.5642	10.7821	10.7745	11.6999	14.4118	15.1435	12.3486
TGME49_215360	dense granule protein GRA62	GRA62	8.59689	8.27735	0	0.934297	0	0.790673	0.103731	7.16415	8.04513	13.8294
TGME49_217530	dense granule protein GRA63	GRA63	9.96292	12.1282	0.783977	4.0403	3.55658	4.39257	4.1816	8.95508	9.41993	14.8753
TGME49_202620	dense granule protein GRA64	GRA64	11.5241	12.584	2.69379	3.88964	2.89919	4.5736	4.08984	8.71725	9.40907	7.90748
TGME49_241240	dense granule protein GRA65	GRA65	13.1718	10.566	7.98707	8.19274	8.77469	8.22652	8.91798	7.17021	7.72187	9.57906
TGME49_320490	dense granule protein GRA66	GRA66	11.2651	11.6385	10.2583	10.4751	10.609	10.4758	10.8437	13.5073	13.5432	11.5051
TGME49_226420	dense granule protein GRA69	GRA69	11.2987	13.6011	9.83492	10.3247	10.4649	10.2968	9.17625	13.5853	13.6592	11.2963
TGME49_203310	dense granule protein GRA7	GRA7	15.0288	15.9145	9.9436	11.232	11.1733	11.1625	9.40604	4.8893	5.05935	18.123
TGME49_249990	dense granule protein GRA70	GRA70	12.6817	11.528	10.5554	10.7004	10.7131	10.4273	9.95557	0.425737	1.05935	13.4195
TGME49_309600	dense granule protein GRA71	GRA71	12.0394	11.9963	10.2836	10.1507	10.0361	10.1345	9.2679	9.1733	9.17117	12.7659
TGME49_272460	dense granule protein GRA72	GRA72	9.22223	9.6256	8.91989	9.13357	9.02249	8.92894	7.8549	3.73335	6.16069	8.78609
TGME49_299780	dense granule protein GRA76	GRA76	11.087	9.93982	2.83077	3.63957	1.83099	2.83865	3.82732	8.61919	8.92153	14.5196
TGME49_254720	dense granule protein GRA8	GRA8	13.7297	12.0472	3.38814	4.91209	4.46599	4.17668	2.39212	0.691662	3.34622	14.8805
TGME49_273980	dense granule protein GRA80	GRA80	3.46231	2.83541	12.9656	13.8173	14.0132	13.1364	13.4942	2.13628	3.60227	4.55035
TGME49_243940	dense granule protein GRA81	GRA81	3.97469	6.06805	12.8092	13.08	12.7596	12.5779	11.3981	9.35981	9.74137	8.35883
TGME49_277230	dense granule protein GRA82	GRA82	4.91966	6.51722	12.244	12.6198	12.4889	12.1501	11.0644	5.25245	5.65342	6.95853
TGME49_297900	dense granule protein GRA83	GRA83	10.6573	11.9406	8.70968	8.68488	8.71828	8.44028	7.9287	8.13284	8.60658	11.6426
TGME49_251540	dense granule protein GRA9	GRA9	12.679	14.3537	10.2941	10.6551	10.9824	10.6316	10.475	10.4351	10.9682	13.5609
TGME49_235620	deoxyhypusine synthase	N/A	8.88517	9.98271	10.9965	10.7029	10.2462	10.4135	9.50261	8.70638	10.3113	10.1385
TGME49_270650	deoxyribose-phosphate aldolase	N/A	6.73422	9.79733	9.41186	8.48227	8.27187	8.64754	8.31955	10.958	11.4161	4.87046
TGME49_318750	deoxyribose-phosphate aldolase	DPA	10.3735	15.3791	8.06983	8.0563	8.05099	8.64607	8.88241	8.71458	9.24679	4.15795
TGME49_233140	deoxyuridine 5'-triphosphate nucleotidohydrolase, putative	N/A	9.80307	8.63959	10.9055	10.6451	9.85877	10.2286	9.52687	2.064	2.24934	4.89375
TGME49_500121	dephospho-CoA kinase	DPCK	7.49725	8.31846	8.04872	8.08783	7.77069	7.94435	7.08675	8.61823	8.06561	9.39631
TGME49_217160	Der1 family protein	N/A	9.66746	10.6307	9.43387	9.4807	9.40722	9.62801	9.56954	13.2095	13.5344	11.7596
TGME49_294290	Der1ER1	N/A	10.6533	10.5321	10.4433	10.4201	10.1075	10.2064	10.3551	13.1581	13.7226	11.5215
TGME49_237460	DER1-like protein	N/A	8.04014	6.06352	7.78425	7.49982	7.85337	7.3526	7.72571	4.46708	3.03301	5.80035
TGME49_286800	deubiquitinating enzyme MINDY, putative	N/A	8.74586	7.87001	8.64472	8.66235	8.82381	8.63442	9.20514	10.0773	8.78147	10.5022
TGME49_226370	dgat2l1-prov protein	N/A	9.3628	9.93246	10.4233	9.91517	10.1907	10.3213	10.9599	7.46918	8.21561	12.2894
TGME49_260430	DHH phosphoesterase, putative	N/A	6.59439	7.25457	8.19338	8.19667	8.0271	7.8968	7.42951	0	0	2.05148
TGME49_275600	diacylglycerol acyltransferase	N/A	0	1.55914	2.95099	6.46234	7.48068	8.31874	10.4955	15.4897	16.1017	9.70493
TGME49_202460	diacylglycerol kinase accessory domain (presumed) domain-containing protein	DGK1	9.76362	8.47208	9.69197	9.63009	9.64196	9.5924	9.69862	8.50594	8.74013	7.84104
TGME49_259830	diacylglycerol kinase DGK2	DGK2	9.37781	9.31017	9.60538	9.68922	9.89779	9.54959	9.68078	4.09153	4.3956	4.53272
TGME49_239250	diacylglycerol kinase DGK3	DGK3	9.68498	9.48465	9.06627	8.93124	9.17154	8.94916	9.41158	4.847	3.86588	8.00531
TGME49_320120	diadenosine tetraphosphatase family protein	N/A	8.2445	9.00995	8.10133	7.75726	7.54045	7.90455	8.15987	10.5934	10.2818	10.5629
TGME49_278740	diaminopimelate decarboxylase	N/A	7.97539	8.70294	10.2899	9.84415	10.2534	10.5678	11.1044	13.4573	14.0158	7.74761
TGME49_243680	dihydrodipicolinate reductase	N/A	7.80936	8.30872	9.63649	9.35016	9.58441	9.73995	9.95156	8.2979	8.72539	4.70839
TGME49_242300	dihydrodipicolinate synthase	N/A	0.227194	0	8.099	8.50326	9.03258	9.18583	10.4141	14.1638	14.6325	7.34082
TGME49_285680	dihydrolipoamide acyltransferase, putative	N/A	9.13442	9.18901	9.89877	10.2335	10.0299	10.0046	10.0226	11.602	11.8084	11.5022
TGME49_219550	dihydrolipoyllysine-residue succinyltransferase component of oxoglutarate dehydrogenase	N/A	10.4129	9.80112	11.2292	11.4092	11.2226	11.0579	11.1105	11.4076	11.9857	12.3096
TGME49_293610	dihydroorotase	DHO	8.36896	9.22491	9.45853	9.70484	9.18952	9.51455	8.88378	11.8878	12.5766	8.96694
TGME49_210790	dihydroorotate dehydrogenase	DHODH	9.24737	9.41742	9.84205	9.57156	9.09212	9.28599	8.58508	4.01905	4.28919	11.3613
TGME49_202790	dihydrouridine synthase (dus) protein	N/A	7.28742	8.07663	7.92462	8.82668	8.72443	8.61954	8.69115	12.1773	11.4396	9.51285
TGME49_228080	dihydrouridine synthase (dus) protein	N/A	9.37964	9.41686	9.11969	9.10875	9.10264	9.00096	8.19589	7.15116	7.79455	10.1094
TGME49_272570	dihydrouridine synthase (dus) protein	N/A	8.09858	9.30937	8.66156	8.58256	8.37828	8.83824	9.5566	8.69781	8.55444	7.64034
TGME49_280780	dihydrouridine synthase (dus) protein	N/A	7.21402	6.94193	8.24197	7.79577	7.62301	7.60831	6.91558	7.01662	6.96664	5.29399
TGME49_266880	dihydrouridine synthase, putative	N/A	7.31043	7.73593	9.22629	9.22143	8.85644	8.96338	8.0988	7.91651	9.4786	10.5315
TGME49_300320	dimethyladenosine transferase	N/A	7.42272	7.14332	7.71935	7.65502	7.36812	7.18002	6.63956	9.86152	9.39542	5.0619
TGME49_295450	DIP13 homolog	DIP13	10.9825	11.319	8.973	9.06479	8.81132	9.20399	9.77475	13.9871	14.9986	10.4468
TGME49_245500	dipeptidyl peptidase iv (dpp iv) n-terminal region domain-containing protein	N/A	9.34349	8.57752	9.49391	9.26522	9.26251	9.3593	10.008	8.48104	8.65341	9.06353
TGME49_261060	diphthamide biosynthesis protein 2-related domain-containing protein	N/A	7.63554	7.3861	8.45826	8.34548	8.3048	8.23051	7.61376	7.73095	7.39204	9.99192
TGME49_249920	diphthine synthase, putative	N/A	8.16867	9.25882	10.031	9.73498	9.19007	9.62719	8.85503	4.65358	3.99279	9.35534
TGME49_224910	divalent cation tolerance protein, CutA1 family protein	N/A	9.43703	8.15808	9.56319	8.92362	8.66885	8.97079	8.46725	1.52124	2.02659	4.00038
TGME49_267270	divalent metal transporter, putative	N/A	9.81024	10.148	8.67	8.26301	8.645	8.9006	9.66139	12.3173	12.5238	10.7718
TGME49_220090	DIX domain-containing protein	N/A	8.87459	10.0771	9.66699	9.89181	9.57983	9.95923	10.0776	13.0242	13.539	10.8612
TGME49_214290	DJ-1 family protein	N/A	11.2676	11.8922	11.9053	11.8773	11.5741	11.5873	11.2693	5.01521	5.29911	12.314
TGME49_500032	DLEC1 domain-containing protein, putative	N/A	5.45131	8.13713	5.31369	7.47288	8.36303	8.4719	9.50587	5.35826	5.95897	8.96373
TGME49_318600	DNA /pantothenate metabolism flavoprotein	N/A	9.06748	9.84186	8.70637	8.5776	8.54318	8.8241	8.84595	12.2519	13.0683	9.54996
TGME49_304680	DNA damage-inducible protein 1	DDI1	9.17597	9.0251	8.55149	8.72045	8.7051	8.69579	9.19875	9.51058	8.89334	7.90548
TGME49_216870	DNA excision repair helicase	N/A	8.97801	8.35217	9.33112	9.16244	9.10468	9.2024	9.06136	11.2647	11.7967	9.55404
TGME49_221330	DNA gyrase subunit A	GYRA	9.95685	9.07209	9.14944	8.95952	8.48251	8.66679	7.78054	6.15821	7.25589	7.53497
TGME49_297780	DNA gyrase subunit B	GYRB	9.41221	4.0878	8.42424	8.29044	8.25769	8.16959	7.75985	9.02425	8.71517	7.39483
TGME49_314955	DNA ligase (NAD+), putative	N/A	7.12461	3.38124	7.1267	6.09936	6.64181	6.41274	6.21058	6.6865	5.62659	6.6914
TGME49_208580	DNA ligase 1, putative	N/A	9.99063	9.91673	9.76428	9.60171	9.54784	9.51891	9.77892	10.4116	10.312	6.64351
TGME49_227660	DNA methyltransferase DNMTa	DNMTa	7.03762	7.04963	7.41038	7.63644	7.66578	7.75018	7.14263	8.85298	8.90185	7.09998
TGME49_243610	DNA methyltransferase DNMTb	DNMTb	8.88961	8.97086	9.70147	9.29324	9.15675	9.30354	9.12439	9.14804	7.82026	10.2094
TGME49_261000	DNA mismatch repair protein MSH2, putative	N/A	10.2761	9.67991	9.90465	9.78443	9.67269	9.77471	10.2991	10.9714	10.0497	8.69979
TGME49_290640	DNA mismatch repair protein MSH6-1, putative	N/A	11.2893	11.1113	10.5023	10.246	10.1148	9.99133	9.98505	8.30715	7.11926	10.7597
TGME49_236200	DNA mismatch repair protein, C-terminal domain-containing protein	N/A	9.23672	9.73197	9.1135	9.09186	8.99689	9.17931	8.69375	8.87944	7.48723	7.13716
TGME49_266390	DNA mismatch repair protein, C-terminal domain-containing protein	N/A	8.60107	3.73674	7.09817	7.92865	7.85351	7.80411	8.0854	7.67239	5.80092	7.0475
TGME49_258030	DNA polymerase	N/A	8.87498	8.16098	9.49755	9.56935	9.42143	9.19137	9.39363	10.3541	9.4993	9.70117
TGME49_217910	DNA polymerase (pol2) superfamily protein	N/A	10.7093	9.29609	10.2672	10.0907	10.065	10.1178	10.3033	10.2982	9.7344	9.85848
TGME49_233820	DNA polymerase delta small subunit, putative	N/A	8.72827	8.21296	9.26946	9.10112	8.89927	8.77293	8.93478	10.1297	10.2586	6.73024
TGME49_254640	DNA polymerase delta subunit 4, putative	N/A	6.98315	9.56054	3.39889	4.20145	4.33567	4.36631	4.16969	8.53904	8.65088	10.478
TGME49_268600	DNA polymerase epsilon subunit B protein	N/A	8.94287	7.06053	9.59567	9.16068	9.01929	9.17063	9.19948	10.1522	10.5003	8.66948
TGME49_280690	DNA polymerase epsilon subunit B protein	N/A	8.54849	7.76275	9.54537	8.80089	8.61309	8.67451	8.41117	4.32231	4.35416	4.12597
TGME49_264670	DNA polymerase family B protein	N/A	9.03876	8.84739	8.44496	8.40087	8.58357	8.53586	8.93982	11.1184	11.5289	9.16817
TGME49_319860	DNA polymerase family B protein	N/A	10.1634	9.22696	10.4568	10.0795	9.97954	10.118	9.79995	7.32096	7.31213	5.53446
TGME49_237830	DNA polymerase I domain-containing protein	N/A	9.01791	7.66012	7.98277	8.544	8.63397	8.35912	9.00198	10.6272	10.8686	9.24508
TGME49_230080	DNA polymerase theta, putative	N/A	9.10176	8.48127	8.06815	8.12468	8.37187	8.38793	8.46391	8.54455	8.16939	6.86494
TGME49_287180	DNA polymerase V, putative	N/A	9.1958	8.31043	10.0248	10.1526	10.2891	9.99142	9.24362	6.70138	7.2949	8.29364
TGME49_288730	DNA polymerase, putative	N/A	7.75393	8.30112	6.71206	7.171	7.34738	7.23469	7.43884	8.75266	7.8346	7.52746
TGME49_297840	DNA primase, large subunit	N/A	10.7816	11.3914	10.1107	9.86602	9.68995	9.86891	9.83299	12.4249	12.1518	12.3618
TGME49_205398	DNA repair and recombination protein RAD54, putative	N/A	0	1.82339	0.53667	2.66291	2.50451	2.5092	3.38787	14.2892	15.3427	7.63576
TGME49_289670	DNA repair metallo-beta-lactamase	N/A	8.12244	9.21144	7.70384	8.26002	7.72687	8.27442	8.14817	13.0777	13.7014	10.4107
TGME49_214820	DNA repair protein DRE	N/A	9.37506	9.9576	9.77441	9.6663	9.47152	9.64425	9.06659	6.12104	5.54137	10.7913
TGME49_249330	DNA repair protein rad10 subfamily protein	N/A	7.79439	6.43144	7.62222	6.75617	6.8748	6.89634	6.75757	1.86666	2.64238	8.91754
TGME49_301222	DNA repair protein Rad4 domain-containing protein	N/A	8.38304	7.93243	8.51345	8.52268	8.53302	8.6616	8.30091	8.5079	7.72617	7.96253
TGME49_257180	DNA repair protein RAD50, putative	RAD50	9.33104	8.45549	9.05198	8.98454	9.19003	9.1241	9.50069	10.2036	9.54195	6.76841
TGME49_272900	DNA repair protein RAD51	RAD51	9.31271	8.69565	9.47925	9.43887	9.34088	9.57694	10.0422	13.6499	14.532	8.63016
TGME49_321430	DNA repair protein recA , putative	N/A	7.96519	7.28979	7.33384	7.30906	7.33186	7.41311	8.06265	13.6414	15.2611	7.10707
TGME49_286140	DNA replication complex GINS protein Psf2, putative	N/A	9.00659	8.30661	9.06817	9.01243	9.05894	8.99633	9.65806	6.61415	7.11429	5.08815
TGME49_214970	DNA replication licensing factor MCM2	MCM2	11.7221	10.5532	11.1767	10.7106	10.4136	10.494	9.99668	2.75735	4.84031	5.91053
TGME49_216730	DNA replication licensing factor MCM3, putative	MCM3	11.651	10.752	10.7248	10.5984	10.3768	10.2591	10.0438	9.99152	10.1982	9.55364
TGME49_219700	DNA replication licensing factor MCM4, putative	N/A	11.24	9.78635	10.6007	10.6942	10.4388	10.3101	10.1962	8.07598	7.38195	7.94999
TGME49_243920	DNA replication licensing factor MCM5, putative	N/A	11.2093	9.41706	10.7332	10.3231	10.0967	10.0672	10.1864	13.1823	13.1148	11.3666
TGME49_219860	DNA replication licensing factor MCM6, putative	MCM6	11.775	10.5575	10.9873	10.8248	10.5668	10.5803	10.1741	7.05227	6.55631	8.27409
TGME49_237220	DNA replication licensing factor Mcm7, putative	N/A	11.1099	10.5395	11.0611	10.8128	10.5698	10.6877	10.7014	11.5056	11.3595	7.988
TGME49_312230	DNA topoisomerase 2, putative	N/A	10.6993	10.3178	11.0257	10.5596	10.2517	10.4944	10.253	12.5457	12.4597	9.88068
TGME49_273930	DNA topoisomerase domain-containing protein	N/A	9.92228	10.5294	9.53348	9.91097	9.63053	9.63349	9.56173	12.5491	12.0046	11.1146
TGME49_277530	DNA topoisomerase domain-containing protein	N/A	8.15471	6.57798	7.23395	7.51401	7.80648	7.47343	8.22242	8.72956	8.07832	5.28176
TGME49_226480	DNA topoisomerase family protein	N/A	8.11872	7.97765	8.84947	8.83014	8.38973	8.4654	8.2671	10.9615	11.9322	7.79208
TGME49_234360	DNA topoisomerase I, putative	N/A	10.2319	9.56822	10.7962	10.4766	10.2247	10.1893	9.60242	3.99066	4.22946	10.8976
TGME49_264450	DNA topoisomerase III beta-1, putative	N/A	9.24537	8.95122	9.68581	9.50051	9.33597	9.33265	9.01118	10.2692	10.3518	10.1103
TGME49_208710	DNA/RNA non-specific endonuclease	N/A	8.38182	8.63284	7.93267	7.64012	7.47532	7.50891	6.79776	2.74975	7.0523	4.28733
TGME49_286690	DNA/RNA-binding protein KIN17 domain-containing protein	N/A	8.79605	10.1827	9.82943	9.65398	9.43666	9.62092	8.85294	10.1113	11.4043	12.2685
TGME49_246060	DNA-dependent RNA polymerase	POLRMT	7.92386	7.81397	7.76578	8.56381	8.67073	8.25945	7.79078	5.76254	5.54475	7.01311
TGME49_285540	DNA-directed DNA polymerase	N/A	8.04095	4.00673	8.57765	8.61949	8.56081	8.55025	7.82391	8.13865	7.9321	6.57544
TGME49_249560	DNA-directed RNA polymerase alpha chain rpoA	RPOA	8.36378	8.36921	8.72493	8.55147	8.28496	8.30474	8.02764	2.67301	5.79404	4.42335
TGME49_244880	DNA-directed RNA polymerase I RPA1	POLR1A	10.0175	8.63474	10.3725	10.5897	10.6089	10.4405	9.6981	8.32219	7.50596	9.59975
TGME49_250060	DNA-directed RNA polymerase I RPA12	RPA12	7.91301	6.03788	8.1438	8.21175	8.14922	7.94179	7.33276	6.38698	6.88005	8.41897
TGME49_297530	DNA-directed RNA polymerase I RPA2	POLR1B	9.06142	8.33215	9.90523	10.0852	10.0499	9.81801	9.27312	4.57906	4.26397	9.51712
TGME49_246630	DNA-directed RNA polymerase I RPA43	RPA43	8.55525	8.80746	9.35071	9.72494	9.54083	9.30483	8.54389	5.72899	7.26646	7.85289
TGME49_267390	DNA-directed RNA polymerase I RPAC1	POLR1C	9.53606	9.44249	10.0778	10.3826	10.0161	10.151	9.25809	9.78133	9.48364	6.47958
TGME49_261540	DNA-directed RNA polymerase I RPAC2	N/A	8.28707	9.308	9.31876	9.06653	8.81114	9.12861	7.74989	5.46646	5.95084	9.32483
TGME49_247950	DNA-directed RNA polymerase II largest subunit	N/A	0.734324	3.202	6.53905	8.70022	9.29057	9.85502	11.937	9.90657	9.84487	7.87157
TGME49_254140	DNA-directed RNA polymerase II RPABC4	POLR2K	8.90934	8.2541	9.67656	9.6508	9.44871	9.44585	9.00721	9.77699	9.57908	8.93788
TGME49_225260	DNA-directed RNA polymerase II RPB1	POLR2A	10.7127	9.58681	11.0332	10.7446	10.8083	10.6942	10.5594	10.3026	10.6345	10.8002
TGME49_217560	DNA-directed RNA polymerase II RPB10	POLR2L	8.82282	10.3294	9.82123	10.1075	9.46787	9.88924	8.65318	4.3392	5.14248	10.8552
TGME49_315920	DNA-directed RNA polymerase II RPB11A	POLR2J	9.00902	7.9222	9.62003	9.41384	9.25295	9.43404	9.28265	9.98673	9.84767	9.90275
TGME49_258210	DNA-directed RNA polymerase II RPB2	N/A	10.5256	10.3477	10.9603	10.9898	10.7841	10.8724	10.7177	12.9866	13.6823	12.1071
TGME49_238190	DNA-directed RNA polymerase II RPB3	POLR2C	9.32208	8.48796	9.5034	9.59823	9.43827	9.32607	9.17085	9.46374	9.25298	9.30879
TGME49_231380	DNA-directed RNA polymerase II RPB4	POLR2D	9.04816	9.16754	9.20717	9.08937	8.62432	9.01642	8.42156	11.3196	11.181	10.3343
TGME49_240590	DNA-directed RNA polymerase II RPB5	POLR2E	10.3195	12.1161	11.5609	11.5726	10.95	11.4131	10.3315	9.4417	9.90432	11.0622
TGME49_270780	DNA-directed RNA polymerase II RPB6	POLR2F	8.25143	7.51206	8.16334	8.45978	8.45782	8.18107	7.96488	5.18661	5.41625	8.31329
TGME49_271300	DNA-directed RNA polymerase II RPB7	POLR2G	8.41242	4.09732	8.95358	9.13579	8.77284	9.13236	8.49703	7.64206	6.97426	7.89373
TGME49_202690	DNA-directed RNA polymerase II RPB9	POLR2I	8.92564	7.50512	8.63952	8.95653	8.78547	8.77388	8.31449	7.40913	6.91523	9.72439
TGME49_233720	DNA-directed RNA polymerase II RPBABC8	POLR2H	8.12413	8.42153	8.98672	8.62118	8.65383	8.49711	7.95884	4.66074	4.25715	7.27977
TGME49_224590	DNA-directed RNA polymerase III POLR3C	POLR3C	8.75099	7.46699	8.85185	8.85199	8.87115	8.59956	8.0562	3.96776	2.52148	9.73133
TGME49_306290	DNA-directed RNA polymerase III RPC1	POLR3A	9.31917	8.99673	9.5277	9.2235	8.96947	8.9796	8.12022	0	2.58481	8.33113
TGME49_312250	DNA-directed RNA polymerase III RPC11	POLR3K	6.61481	5.29332	7.6816	7.56693	7.3572	7.47334	7.12578	7.04781	7.6448	2.34568
TGME49_272740	DNA-directed RNA polymerase III RPC2	POLR3B	10.4514	9.52885	9.83636	10.5724	10.743	10.1903	9.96636	10.9931	11.293	9.04972
TGME49_264460	DNA-directed RNA polymerase III RPC5	POLR3E	8.56671	7.99203	9.04115	9.10084	9.11189	8.80028	8.44119	8.65317	7.87094	9.57138
TGME49_217580	DNA-directed RNA polymerase III RPC6	POLR3F	8.95759	9.79482	8.7516	9.06206	8.76598	8.95008	8.41086	11.3239	11.001	9.81815
TGME49_254280	DNA-directed RNA polymerase III RPC9	RPC9	7.63597	6.73405	7.0301	8.25108	8.1876	7.92375	7.84324	6.38596	5.90723	8.2044
TGME49_266680	DNA-directed RNA polymerase III subunit RPC4, putative	N/A	9.22171	9.66333	9.81521	9.87159	9.65572	9.56413	8.91196	0	2.77001	9.6207
TGME49_313120	DNA-directed RNA polymerase, alpha subunit	N/A	7.81377	3.06621	7.89885	7.68025	7.88949	7.64737	7.6549	0.425737	2.64238	3.34407
TGME49_326700	DNA-directed RNA polymerase, putative	N/A	5.06968	1.82339	3.75409	3.85119	4.87474	4.41672	4.73578	3.33803	1.2241	4.69774
TGME49_207760	DnaJ C terminal region domain-containing protein	N/A	10.4601	9.83835	10.3245	10.4785	10.5833	10.2771	10.0108	7.54004	6.71959	7.48697
TGME49_253650	DnaJ C terminal region domain-containing protein	N/A	11.2292	11.9688	10.4799	10.2109	9.95746	10.1369	10.5332	14.074	14.6573	11.6555
TGME49_201670	DnaJ domain-containing protein	N/A	9.0356	9.02379	8.85167	8.82532	9.08543	8.94135	8.49077	8.07283	7.89201	10.3381
TGME49_203380	DnaJ domain-containing protein	N/A	9.4586	8.403	9.85698	9.99307	9.74493	9.61209	8.98637	6.35559	7.0312	8.09815
TGME49_210430	DnaJ domain-containing protein	N/A	10.6565	10.038	8.8007	8.55478	8.68324	8.72849	9.93704	13.8784	13.6439	9.37985
TGME49_214330	DnaJ domain-containing protein	N/A	7.78761	9.64456	8.72697	8.68972	8.54481	8.70841	8.83398	11.311	10.8856	11.385
TGME49_214530	DnaJ domain-containing protein	N/A	8.73497	9.48649	9.43335	9.28719	8.93659	9.24658	8.44181	5.92399	6.08197	10.4707
TGME49_217710	DnaJ domain-containing protein	N/A	1.04596	1.13777	10.459	10.974	11.0834	11.4092	11.9669	7.4294	8.22211	7.02473
TGME49_223420	DnaJ domain-containing protein	N/A	8.26453	9.88823	8.01158	8.40761	8.12517	8.46952	7.82391	11.1653	12.068	11.0594
TGME49_224670	DnaJ domain-containing protein	N/A	8.81474	8.80095	8.31777	8.2931	9.0023	9.04936	10.968	13.711	13.9202	9.52965
TGME49_226068	DnaJ domain-containing protein	N/A	9.77757	9.13898	9.48564	9.5684	9.36729	9.34729	9.45652	12.6816	13.1343	10.5971
TGME49_232050	DnaJ domain-containing protein	N/A	11.0173	10.0925	11.5761	11.4435	11.4156	11.3694	11.5242	11.1193	11.7283	11.5838
TGME49_244350	DnaJ domain-containing protein	N/A	8.42011	6.21207	9.13939	9.01876	8.82171	9.02926	8.19846	4.85501	4.54461	8.97075
TGME49_246340	DnaJ domain-containing protein	N/A	11.7512	11.9201	10.5067	10.5963	10.7294	10.7338	11.1669	12.8812	12.7636	12.9681
TGME49_256810	DnaJ domain-containing protein	N/A	7.9608	7.30233	8.26363	8.00304	8.07408	7.78765	7.72011	8.64575	7.91576	8.19233
TGME49_259980	DnaJ domain-containing protein	N/A	10.0174	10.055	10.6283	10.3167	10.1547	10.3616	10.6932	13.7295	14.5186	11.3449
TGME49_260210	DnaJ domain-containing protein	N/A	8.0573	7.01469	8.50653	8.02918	7.96404	7.90041	7.57084	7.07284	5.70626	7.57678
TGME49_267430	DnaJ domain-containing protein	N/A	11.2125	11.3102	11.0276	10.6123	10.3201	10.608	10.8901	14.575	15.1685	11.5669
TGME49_271910	DnaJ domain-containing protein	N/A	7.46366	7.31185	7.51366	7.42671	7.15945	7.37089	7.15702	8.3776	9.12575	8.04167
TGME49_273630	DnaJ domain-containing protein	N/A	8.59018	8.09115	9.11137	9.04649	8.85002	9.09083	9.28782	11.5476	11.1239	10.9143
TGME49_283580	DnaJ domain-containing protein	N/A	8.04659	8.80122	9.17109	9.12007	8.9472	8.91291	8.60842	8.1992	7.87204	10.0918
TGME49_285268	DnaJ domain-containing protein	N/A	8.72111	9.04491	9.83652	9.43685	9.22494	9.49379	8.82665	4.54706	3.87053	10.2332
TGME49_289240	DnaJ domain-containing protein	N/A	5.13868	2.88785	11.4349	11.2706	11.6415	11.7454	11.7549	4.16337	8.95889	8.22348
TGME49_290880	DnaJ domain-containing protein	N/A	8.03893	7.78534	7.85302	7.60981	7.65264	7.59945	6.96463	8.16975	8.525	8.94976
TGME49_301340	DnaJ domain-containing protein	N/A	9.19392	9.37384	9.7407	9.33339	9.46354	9.48731	9.33055	7.03839	7.01871	10.957
TGME49_313310	DnaJ domain-containing protein	N/A	9.79264	9.70773	9.71056	9.68527	9.59605	9.61122	8.74428	8.50981	8.9408	12.8862
TGME49_313400	DnaJ domain-containing protein	N/A	10.7143	10.5935	9.9091	9.88842	9.92202	9.90726	10.4941	9.66969	10.4703	12.1197
TGME49_315690	DnaJ domain-containing protein	N/A	8.57739	7.38408	8.02372	8.10162	7.76984	7.97225	8.34953	11.2196	10.8299	7.75338
TGME49_320060	DnaJ domain-containing protein	N/A	9.28578	8.37025	8.87612	8.98197	9.02529	9.28753	9.89496	12.727	11.996	11.0309
TGME49_311240	DnaJ family chaperone J1	N/A	12.4898	12.1159	13.1378	13.1788	13.0234	13.214	12.9067	9.14463	9.56799	13.2422
TGME49_260630	DnaJ family Sec63 protein	N/A	10.6766	9.50484	11.1754	10.9958	10.9865	10.9265	11.3389	8.14552	8.36983	8.23514
TGME49_258390	DnaJ protein, putative	N/A	11.0685	11.688	11.6505	11.4827	11.0457	11.3291	11.0236	5.59209	6.16015	9.17105
TGME49_219310	DnaK family protein	N/A	11.7244	10.4076	11.9725	12.2799	12.3321	12.0918	12.3793	7.44969	6.43661	8.36845
TGME49_226830	DnaK family protein	N/A	11.7345	10.3469	12.2338	12.3939	12.4128	12.2248	12.671	9.69471	8.86019	9.78503
TGME49_202020	DnAK-TPR	N/A	11.6594	16.7209	0	1.04026	1.20005	1.794	0.200501	3.99066	7.08255	14.0459
TGME49_260340	DNL zinc finger protein	N/A	7.42238	8.24983	8.65937	8.68263	8.5454	8.60346	7.78737	8.35139	7.51501	8.57086
TGME49_271170	dolichol kinase	N/A	8.84855	8.02752	9.99993	9.74352	9.43162	9.73913	9.50395	10.2162	11.2072	9.86945
TGME49_262930	dolichol-phosphate mannosyltransferase subunit 3, putative	N/A	9.5261	10.4508	9.71786	9.75349	9.18139	9.62366	8.52387	8.58483	9.4096	11.0225
TGME49_277970	dolichol-phosphate-mannose synthase family protein	N/A	7.7847	8.14229	9.16796	9.05413	8.56304	8.87128	8.49554	8.16723	8.78444	10.5779
TGME49_203970	dolichyl-diphosphooligosaccharide--protein glycosyltransferase	N/A	8.81942	7.54621	9.30042	9.32652	9.15821	9.16652	9.17829	4.83685	5.71455	6.09901
TGME49_216540	dolichyl-phosphate beta-glucosyltransferase	N/A	8.28665	8.28142	8.01299	7.94404	8.19394	7.98448	8.39209	8.62732	7.73219	6.33275
TGME49_235930	domain K- type RNA binding proteins family protein	N/A	12.4302	12.5335	13.132	13.1471	12.8778	12.8301	12.5046	11.8059	12.5779	12.7978
TGME49_214230	Dopey, N-terminal domain-containing protein	N/A	8.98702	8.17771	7.93647	8.11601	8.31712	8.31263	8.90143	8.98244	7.73387	6.97255
TGME49_240910	double C2-like domain-containing protein DOC2.1	N/A	10.3978	9.28713	9.45876	9.91264	10.0085	9.73976	10.2572	11.0634	10.4599	10.7268
TGME49_256030	doublecortin domain-containing protein DCX	DCX	11.041	10.1462	9.18865	9.96434	9.85561	9.68736	9.90923	12.8419	13.966	8.98071
TGME49_278060	double-strand break repair protein MRE11, putative	N/A	8.62247	8.60445	8.85859	8.57832	8.5355	8.56097	9.13303	9.73739	8.81792	7.80268
TGME49_215410	DPCD family protein	N/A	0.524436	0	7.53677	8.6632	8.90841	9.29107	10.1648	8.81522	9.17016	4.54659
TGME49_232690	DP-fucose transporter, putative	N/A	9.48425	10.1502	9.25926	9.13677	8.81214	9.03831	8.91442	10.64	11.3784	10.747
TGME49_280400	Dpy-19-like C-mannosyltransferase	DPY19	9.37145	8.14073	9.34648	8.88172	9.02993	9.33054	9.42056	4.19984	5.38398	7.69583
TGME49_230460	Dpy-30 motif protein	N/A	4.47603	8.23269	6.68936	7.83637	8.65507	8.86681	9.96443	8.20333	8.16353	3.63406
TGME49_272260	Dpy-30 motif protein	N/A	1.75143	5.02539	3.22486	6.9404	7.70024	8.12204	9.16355	4.43411	5.30228	6.66147
TGME49_280510	Dpy-30 motif protein	N/A	6.49018	8.15822	8.68188	9.32098	9.39808	9.7443	10.3453	6.57297	6.48313	8.28676
TGME49_500047	Dpy-30 motif protein	N/A	2.07157	7.64044	7.04128	8.73003	9.66665	10.3799	11.2291	8.11807	8.70492	8.15308
TGME49_216830	DTW domain-containing protein	N/A	7.37374	6.97113	7.72437	8.21404	7.85007	7.97052	7.32204	10.9121	11.7543	8.58186
TGME49_221500	dual specificity phosphatase, catalytic domain-containing protein	N/A	8.88442	9.24664	8.74835	8.71681	9.02164	9.03781	10.5664	14.8812	15.1409	10.109
TGME49_221590	dual specificity phosphatase, catalytic domain-containing protein	N/A	11.9946	11.7543	1.55993	4.43215	2.70167	4.31341	5.38982	10.1523	10.5091	11.9321
TGME49_268770	dual specificity phosphatase, catalytic domain-containing protein	N/A	8.04594	7.52303	8.36649	8.4312	8.12493	7.98031	7.25039	4.05693	4.08507	9.08676
TGME49_311335	dual specificity phosphatase, catalytic domain-containing protein	N/A	6.33973	6.88341	6.95758	7.47647	8.65675	8.76446	10.1187	6.76101	7.66004	6.41725
TGME49_308830	dual specificity protein phosphatase	N/A	9.8568	9.14257	9.87629	9.96984	10.2024	10.3141	11.6674	7.5854	8.30022	10.7628
TGME49_235890	dual-specificity protein phosphatase	N/A	6.81198	5.74723	8.5286	8.25722	7.90986	8.25086	7.07084	8.68422	8.88484	4.81524
TGME49_320525	DUF1308 domain-containing protein	N/A	8.49427	9.53377	9.1289	8.96929	8.32011	8.71163	7.76875	8.14006	9.40796	4.60568
TGME49_306195	DUF1764 domain-containing protein	N/A	7.20368	7.47993	8.27766	8.08944	7.62747	8.04238	6.70494	3.53346	4.29749	7.73523
TGME49_305540	DUF1769 domain-containing protein	N/A	9.6253	9.94712	9.89579	9.74495	9.79655	9.7832	10.309	10.8841	11.6166	12.4155
TGME49_230650	DUF2362 domain-containing protein	N/A	7.96241	8.94024	8.1183	8.07238	7.72505	7.97727	8.27857	11.8817	12.167	9.98472
TGME49_221970	DUF2423 domain-containing protein	N/A	8.1572	8.05235	9.7264	9.71301	9.41456	9.31566	8.66462	8.793	8.11146	10.2086
TGME49_236530	DUF298 domain-containing protein	N/A	8.76934	9.03263	8.99521	9.03021	8.85413	8.93938	8.92353	10.3074	11.2605	9.34335
TGME49_208330	DUF2981 domain-containing protein	N/A	0.297242	0	0	0	0.643526	1.0748	1.27288	15.2201	15.9185	8.5411
TGME49_204540	DUF367 domain-containing protein	N/A	6.90855	7.50438	8.48236	8.52258	8.22342	8.38569	7.3254	8.79057	8.49743	7.97353
TGME49_209720	DUF4149 domain-containing protein	N/A	10.4775	11.4085	11.5874	11.6485	11.3454	11.5372	11.5455	14.2955	14.4518	12.9187
TGME49_242370	DUF4200 domain-containing protein	N/A	3.37214	2.294	4.01515	5.81284	6.83097	6.86923	8.24847	4.01546	3.58806	1.72768
TGME49_500074	DUF4200 domain-containing protein	N/A	3.71569	7.41888	5.68255	5.03534	6.58816	7.07732	8.23211	7.85148	8.67364	3.55446
TGME49_306070	DUF4201 domain-containing protein	N/A	2.36181	2.65039	7.15051	7.83739	8.58587	9.09085	9.98665	8.15189	8.48445	6.63556
TGME49_288270	DUF4602 domain-containing protein	N/A	7.73612	9.14803	8.41399	8.76689	8.39669	8.51657	7.8139	9.85422	11.3003	8.0401
TGME49_500066	DUF501 domain-containing protein	N/A	7.04584	5.5554	7.8165	7.88482	7.95046	8.06224	8.65318	11.0798	11.4523	8.82602
TGME49_203300	DUF726 domain-containing protein	N/A	9.1727	8.46116	8.44817	8.72593	8.91956	8.62428	9.16991	9.22136	8.69391	9.00364
TGME49_211300	DUF74 family protein, putative	N/A	8.21767	9.81623	9.11795	8.91436	8.24363	8.53428	7.45364	7.1701	7.23072	5.07467
TGME49_311860	DUF789 domain-containing protein	N/A	9.87307	8.4085	9.36253	9.40206	9.89098	9.54318	9.8404	7.21177	6.45023	8.68637
TGME49_312622	DUF803 domain-containing protein	N/A	10.6345	8.99363	8.41538	8.87216	8.88528	8.70521	8.54619	6.16264	7.57587	6.41876
TGME49_243210	DUF862 domain-containing protein	N/A	10.5351	10.5006	8.40254	8.47615	8.70096	8.64881	8.99314	9.2581	10.2897	10.2526
TGME49_288910	DUF866 domain-containing protein	N/A	8.89106	8.87487	9.35403	9.37087	8.97914	8.92454	8.84314	10.7272	11.6564	9.35679
TGME49_313150	DUF89/Fructose bisphosphatase	N/A	10.1706	10.2124	8.26945	8.95383	8.49936	8.7036	7.99723	8.3154	12.3233	12.3596
TGME49_243990	Dullard family phosphatase domain-containing protein	N/A	8.96122	8.5381	8.21965	8.59726	8.62687	8.59038	8.92773	11.5231	10.7432	9.81046
TGME49_263380	Dullard family phosphatase domain-containing protein	N/A	1.66958	3.69773	5.82602	7.05261	8.52929	8.7165	10.4183	5.33739	7.16596	5.28698
TGME49_310660	Dullard family phosphatase domain-containing protein	N/A	8.89521	10.3617	7.58519	8.31258	8.68718	8.48131	7.16078	11.0796	11.7737	11.403
TGME49_221540	DUSP domain-containing protein	N/A	8.65831	8.21681	8.31633	7.98198	8.22971	7.99543	8.73548	10.5747	10.2666	10.3851
TGME49_262450	dymeclin, putative	N/A	10.8511	10.0371	9.36926	9.52731	9.67923	9.81637	10.567	11.4947	12.3173	9.53969
TGME49_313820	dynactin p25, putative	N/A	9.95328	11.461	9.68991	9.02399	9.15915	9.5287	8.90413	11.316	10.5071	11.0087
TGME49_246740	dynactin subunit 2, putative	N/A	9.69775	9.74641	8.49531	8.79215	8.65415	8.67902	8.64703	9.58878	8.68485	9.91736
TGME49_220880	dynactin subunit 3, putative	N/A	9.31247	11.528	8.91571	8.8851	8.77119	9.09696	9.50528	13.4415	14.456	10.693
TGME49_316240	dynactin subunit 4, putative	N/A	9.09897	8.78204	8.41768	8.40289	8.62753	8.45837	8.97445	11.0105	11.3066	6.97394
TGME49_217550	dynactin subunit 6, putative	N/A	10.8758	12.0723	10.8752	10.7764	10.8094	10.9338	11.4289	11.4811	11.167	12.1839
TGME49_326100	dynamin gtpase	N/A	6.37223	3.06621	1.90304	3.11118	1.97257	3.74043	5.00391	2.64707	0	1.83041
TGME49_267800	dynamin-related protein DRPA	DRPA	10.3574	9.83601	9.62646	9.54814	9.41649	9.31486	9.28524	11.8287	12.7299	9.65504
TGME49_321620	dynamin-related protein DRPB	DRPB	12.1009	11.7394	10.8357	10.8857	10.638	10.7137	11.1419	14.6632	15.0241	12.0073
TGME49_270690	dynamin-related protein DRPC	DRPC	10.0413	9.33118	9.97662	9.90066	10.0366	10.0502	10.5168	9.52078	8.98633	10.4335
TGME49_500263	dynein assembly factor 3, putative	N/A	4.78177	8.51372	7.73394	9.09921	9.27867	9.51835	10.4078	4.26339	5.73258	4.56053
TGME49_295920	dynein axonemal assembly factor 4, putative	N/A	2.52324	5.61838	7.62322	8.5042	8.78449	9.03303	9.91782	7.99354	9.3614	9.48236
TGME49_294550	dynein heavy chain	N/A	10.0873	10.0365	9.75645	9.64954	9.95255	9.70338	10.1295	10.4485	10.0889	10.2076
TGME49_249840	dynein heavy chain 2, putative	N/A	8.59594	8.45798	8.61459	9.17527	9.92008	10.2823	11.0854	8.88209	9.39325	9.30512
TGME49_203135	dynein heavy chain family protein	N/A	5.50165	7.93232	7.16777	9.05053	9.90203	10.106	11.0832	12.49	13.767	8.27343
TGME49_309980	dynein heavy chain family protein	N/A	9.67576	9.63436	7.97427	8.44772	9.01557	9.24551	10.0784	8.47236	8.17184	7.91794
TGME49_327400	dynein heavy chain family protein	N/A	0.538828	2.4009	1.63951	1.77054	3.45418	3.83699	4.04493	0	1.2241	0.657633
TGME49_500062	dynein heavy chain, putative	N/A	8.1795	8.71063	8.41259	9.30317	10.0155	10.3146	11.2522	9.4291	9.25894	9.68454
TGME49_500072	dynein heavy chain, putative	N/A	7.5878	8.32696	7.58741	8.55717	9.57429	9.74385	10.8416	8.34256	8.19427	9.15264
TGME49_500227	dynein heavy chain, putative	N/A	4.3923	9.41124	5.60784	6.58973	7.93947	8.43089	9.43228	5.90778	8.11676	8.27979
TGME49_254020	dynein intermediate chain, putative	N/A	3.58192	8.202	7.64851	8.95079	9.12966	9.43958	10.3227	9.29028	8.98129	7.02314
TGME49_277980	dynein light chain	N/A	0.227194	0	0.946493	5.63725	6.23591	6.54786	7.63987	2.064	0.540102	1.63886
TGME49_239550	dynein light chain 2B, cytoplasmic, putative	N/A	3.57108	8.39853	5.06749	7.30213	7.70483	8.16631	9.11685	6.83938	6.73684	5.01201
TGME49_263030	dynein light chain 8 family E protein	N/A	4.29308	1.82339	3.26676	5.55342	5.90922	6.65326	7.27073	2.47928	2.33267	4.45176
TGME49_223000	dynein light chain DLC8a	DLC8a	10.7849	12.1407	11.7149	11.6154	11.4104	12.0394	12.095	5.46771	5.1936	9.76267
TGME49_247560	dynein light chain protein, putative	N/A	1.727	3.36488	6.69673	7.82514	7.98532	8.47972	9.25158	0.425737	1.74134	1.02078
TGME49_262480	dynein light chain roadblock-type 2, putative	N/A	9.69139	10.9865	10.0137	10.288	10.0798	10.4574	10.6726	9.79571	10.8925	10.7009
TGME49_244900	dynein light chain type 1, putative	N/A	0.227194	0	5.80105	7.77478	8.0804	8.4974	9.26213	3.75682	4.85742	0.992678
TGME49_240790	dynein light chain, putative	N/A	1.7664	6.72011	7.03436	7.76034	8.41281	8.56267	9.64442	0.726571	0	6.63412
TGME49_285350	dynein light chain, putative	N/A	0.524436	0	7.14121	8.10386	8.41559	8.97041	9.75261	6.64804	7.58853	3.55973
TGME49_500060	dynein light chain, putative	N/A	3.51636	7.18854	7.27488	8.08462	8.43858	8.77584	9.69978	3.09819	5.11895	6.81757
TGME49_500180	dynein light chain, putative	N/A	0.227194	1.55914	6.76075	8.18884	8.4525	8.96635	9.80416	4.66543	4.47558	5.1465
TGME49_247600	dynein light intermediate chain, putative	N/A	10.0506	10.2188	8.99554	9.22322	9.28364	9.0403	9.45544	10.3165	10.7265	11.1466
TGME49_291160	dynein light polypeptide 4, axonemal, putative	N/A	1.55771	2.294	7.60364	8.82838	9.16388	9.44671	10.3484	6.7103	7.16708	3.24572
TGME49_229915	dynein regulatory complex protein 9, putative	N/A	1.42525	6.2524	6.21223	6.85891	7.94124	8.97464	9.62983	8.46772	7.78198	5.70169
TGME49_213720	dynein regulatory complex subunit 7, putative	N/A	7.75718	10.7663	7.09579	7.49722	8.5879	9.12255	10.1394	10.9191	11.5202	7.92622
TGME49_235920	dynein, axonemal, heavy chain 2 family protein	N/A	7.89233	9.29365	8.13706	9.28436	9.67241	10.0412	10.7595	9.77241	9.87742	9.65488
TGME49_327800	dynein-1-alpha heavy chain, flagellar inner arm I1 complex, putative	N/A	0	2.49398	0	0	0	0.449694	0.605818	1.49567	3.02533	1.12051
TGME49_289070	E1-E2 ATPase subfamily protein	N/A	10.1676	9.13473	9.74336	9.35202	9.04415	8.98579	8.80108	1.9032	3.86588	4.84974
TGME49_239010	E2F4-associated EZH2-inducing gene regulator TEEGR	TEEGR	9.66622	4.48351	7.07168	7.31105	7.83431	6.07997	4.43132	6.31326	7.03549	11.3192
TGME49_223630	E2F-associated phosphoprotein, putative	N/A	7.7971	8.71158	8.43482	8.52114	8.37238	8.35355	8.14247	11.7858	11.2301	10.0298
TGME49_297210	E3 ubiquitin-protein ligase RBBP6, putative	N/A	9.47412	7.39258	9.02141	8.8783	9.11361	9.36395	9.34979	9.35418	8.35479	7.6393
TGME49_213690	E3 ubiquitin-protein ligase RBX1, putative	N/A	9.1203	10.7299	10.3513	10.0854	9.84401	10.1421	10.423	12.5245	13.131	8.94834
TGME49_292235	E3 ubiquitin-protein ligase ZNF598, putative	N/A	8.63356	7.45372	8.58785	8.42183	8.81818	8.34713	8.92153	10.5031	9.02325	8.00012
TGME49_288190	E3 ubiquitin-protein ligase, putative	N/A	8.61559	7.51331	8.51099	8.22745	8.46655	8.75427	9.5072	9.53471	8.36075	7.94576
TGME49_294280	E3 ubiquitin-protein ligase, putative	N/A	9.87655	10.0643	9.85614	9.80795	9.88641	9.96313	10.0643	8.48959	8.7807	11.3096
TGME49_500189	E3 ubiquitin-protein ligase, putative	N/A	3.26829	6.96888	3.83049	6.75218	7.67891	7.94445	9.786	11.3491	11.0318	5.43493
TGME49_222360	E3 UFM1-protein ligase 1	UFL1	10.3983	10.1161	9.53036	9.42793	9.1283	9.17134	9.14239	9.97267	9.30911	8.43309
TGME49_294595	EB1 domain-containing protein	N/A	3.25998	7.21278	7.31049	7.98575	7.98931	8.51364	8.60842	1.97608	6.3214	4.0211
TGME49_232650	EELM2 domain-containing protein	N/A	9.64876	11.2387	8.38126	8.67629	8.51646	8.81003	8.07148	5.86007	6.15792	8.81646
TGME49_206560	EF hand domain-containing protein	N/A	0.297242	0	6.35057	7.98578	8.62943	9.17262	10.1295	3.93786	3.49395	9.51794
TGME49_216620	EF hand domain-containing protein	N/A	10.9155	9.67741	8.72256	8.59037	8.61982	8.53475	7.76381	4.95384	8.27106	7.29407
TGME49_220140	EF hand domain-containing protein	N/A	7.73643	7.70834	7.95941	7.86061	7.60869	7.73268	7.9287	8.42217	8.12977	7.8279
TGME49_223520	EF hand domain-containing protein	N/A	1.06922	0	1.66347	4.40867	3.98953	4.1632	1.6608	14.9292	16.7083	8.53707
TGME49_229910	EF hand domain-containing protein	N/A	1.55771	1.13777	5.42754	5.33085	5.13253	5.28223	6.16184	0	3.66561	4.24631
TGME49_238060	EF hand domain-containing protein	N/A	5.38512	3.75217	4.34046	4.83922	6.26082	7.23722	8.31009	1.74351	2.89488	4.97172
TGME49_238960	EF hand domain-containing protein	N/A	1.16253	2.4009	2.80401	4.943	6.14104	6.72404	8.00186	0.726571	2.10143	4.96742
TGME49_239430	EF hand domain-containing protein	N/A	0.227194	4.73979	3.6722	4.5066	4.17845	5.262	5.81927	14.2031	15.6913	7.47022
TGME49_259710	EF hand domain-containing protein	N/A	10.4096	11.4089	11.4585	11.1038	10.7654	10.9884	10.2284	12.6445	13.1038	11.5941
TGME49_264700	EF hand domain-containing protein	N/A	0.227194	0	2.15712	5.49295	6.43347	7.12162	8.12022	2.83902	4.5203	6.41387
TGME49_271750	EF hand domain-containing protein	N/A	8.5076	10.3397	8.56844	8.08588	8.17212	8.30706	9.44082	10.1601	10.2948	7.69569
TGME49_280480	EF hand domain-containing protein	N/A	10.6938	11.0863	6.78097	7.7139	7.64992	7.31782	6.1528	2.91872	5.57115	7.82848
TGME49_284550	EF hand domain-containing protein	N/A	1.32492	2.65039	7.4749	7.62037	8.71577	8.99544	10.5646	7.90294	9.83947	5.4114
TGME49_293760	EF hand domain-containing protein	N/A	11.3003	12.6172	8.00332	8.53431	8.684	8.54744	7.30105	7.67462	8.57251	11.2288
TGME49_293840	EF hand domain-containing protein	N/A	6.07604	7.72984	6.42316	6.80704	8.02418	7.91386	9.16036	4.33219	4.57957	3.55973
TGME49_305830	EF hand domain-containing protein	N/A	0.50713	5.01368	5.57639	6.16871	6.97646	8.09478	9.06739	5.15095	4.91792	1.90107
TGME49_315860	EF hand domain-containing protein	N/A	8.96726	8.55515	8.63437	8.64319	8.97517	8.94659	9.53008	10.3171	9.27396	7.98921
TGME49_319540	EF hand domain-containing protein	N/A	8.97442	7.62583	7.64549	7.66497	8.21532	8.38699	9.86897	12.8004	13.6603	6.91987
TGME49_500093	EF hand domain-containing protein	N/A	0.524436	0	2.16702	5.44662	7.0887	7.36742	8.66859	1.16409	4.6502	5.23788
TGME49_500257	EF hand domain-containing protein	N/A	0.227194	0	4.13185	5.84984	7.32286	7.97829	9.2686	11.5921	12.1597	5.00587
TGME49_500258	EF hand domain-containing protein	N/A	10.3354	8.8111	10.3543	9.90432	10.348	10.4712	10.4787	8.06628	9.01842	10.5749
TGME49_255660	EF hand domain-containing protein EFP1	EFP1	9.5519	8.46233	8.11152	8.40994	8.95229	9.53415	11.9001	15.3519	14.9134	11.2712
TGME49_266105	EF hand family protein	N/A	2.51094	4.33977	4.92118	6.53483	7.45633	7.94364	8.83115	2.52826	4.20093	5.85383
TGME49_272360	EF hand family protein	N/A	1.7664	1.82339	6.68621	6.47073	7.72985	8.48696	9.57631	7.12594	7.37125	3.27471
TGME49_219140	EF-1 guanine nucleotide exchange domain-containing protein	N/A	10.3465	11.7391	12.8203	12.6017	12.107	12.4912	11.7417	11.2688	10.9804	12.2946
TGME49_226410	EF-1 guanine nucleotide exchange domain-containing protein	N/A	11.9676	12.3577	13.9367	13.7125	13.2729	13.5938	12.9227	8.12782	8.11939	4.83735
TGME49_222100	effector protein SOS1	SOS1	10.6268	9.28052	8.17721	8.7	8.51318	8.49883	7.42514	5.13372	5.48416	5.76532
TGME49_500436	EF-hand calcium-binding domain-containing protein 10, putative	N/A	0.524436	0	5.19147	6.34505	7.4541	8.39275	9.18052	2.0193	3.22782	8.91321
TGME49_247010	EF-hand domain-containing protein	N/A	2.08907	2.01636	4.9217	6.56068	7.89512	8.51596	9.78271	9.21172	9.84045	5.24654
TGME49_500057	EF-hand domain-containing protein	N/A	8.65309	9.8064	8.44511	9.03493	9.9232	10.1072	11.0468	10.4479	10.5317	11.0377
TGME49_500139	EF-hand domain-containing protein	N/A	3.09181	3.20909	4.61694	6.36839	7.42023	8.6015	9.50779	9.62912	9.65407	5.67976
TGME49_500381	EF-hand domain-containing protein	N/A	0.696953	2.98253	1.96483	5.62205	6.45035	6.84855	8.0558	7.43136	7.63348	4.93545
TGME49_256020	EFHC1, putative	N/A	2.78203	5.85524	7.81597	8.61511	9.26251	9.95551	11.653	15.9266	15.0745	10.1098
TGME49_202285	EGF family domain-containing protein	N/A	0	0	0.783977	1.66122	2.33583	2.48983	0.103731	14.7867	16.2068	7.88665
TGME49_238210	EGF family domain-containing protein	N/A	1.91861	7.40467	7.79146	8.48625	8.47224	8.06705	7.13346	0	1.20123	4.7544
TGME49_238220	EGF family domain-containing protein	N/A	3.29882	5.69598	6.85999	8.65871	8.86763	8.08078	7.31935	6.45523	8.0231	2.76043
TGME49_255460	EGF family domain-containing protein	N/A	3.97	10.0382	9.5738	9.24496	9.53537	9.25182	8.1867	1.52124	5.14214	9.02841
TGME49_275790	EGF family domain-containing protein	N/A	0.399711	5.68122	7.5848	8.14163	8.45939	7.7589	7.13805	3.18232	3.15936	4.64483
TGME49_321800	EGF family domain-containing protein	N/A	0	8.66508	8.63229	8.11557	8.52076	8.27735	7.13729	0	0	6.61149
TGME49_265040	EGF-like domain	N/A	9.03394	10.5587	8.24986	8.16886	7.92018	8.62731	9.36553	14.1981	14.9774	10.1988
TGME49_500115	EGF-like domain-containing protein	N/A	5.48774	8.50158	9.47051	9.17654	9.08149	9.32905	7.85164	0	0.446648	2.77071
TGME49_229630	eIF2 kinase IF2K-A (incomplete catalytic triad)	N/A	11.4017	10.408	9.7955	9.68964	10.2117	9.9293	10.0924	11.8173	11.8642	11.4471
TGME49_311510	eIF2 kinase IF2K-B	N/A	11.4874	12.0451	1.16449	2.63998	1.48925	4.34776	4.12724	11.5335	12.4065	11.4827
TGME49_204090	eIF2 kinase IF2K-C	N/A	3.09083	0	0.53667	1.17419	1.17886	2.08987	2.45231	3.15299	5.03418	3.25136
TGME49_204100	eIF2 kinase IF2K-C	N/A	9.36309	6.38197	8.4682	8.21755	8.66264	8.15388	9.25176	9.4252	10.6721	10.8386
TGME49_204110	eIF2 kinase IF2K-C	N/A	6.77039	7.07897	4.13026	5.89328	5.76801	6.36896	6.33036	7.03228	6.41586	9.20686
TGME49_319610	eIF2 kinase IF2K-D (incomplete catalytic triad)	N/A	9.70711	9.16402	9.01086	8.96132	9.27293	9.09545	10.2275	13.2752	13.1411	7.6703
TGME49_267820	electron transfer flavoprotein subunit beta, putative	N/A	8.40576	9.24838	4.6725	6.29315	7.25989	7.64983	9.63971	13.6417	14.4875	8.43486
TGME49_265230	electron transfer flavoprotein-ubiquinone oxidoreductase	N/A	7.32531	8.13777	6.13655	6.58607	7.25288	7.81395	10.11	13.8344	13.5022	10.3377
TGME49_207250	electron-transfer-flavoprotein, alpha polypeptide	N/A	0.50713	0	8.28238	9.19973	9.91633	10.2833	12.2611	16.4716	16.948	10.3614
TGME49_202830	Elicitor-responsive protein, putative	N/A	12.6395	12.7224	3.07808	2.63998	4.21699	2.89324	0.605818	2.20709	5.48002	14.98
TGME49_275680	ELM2 domain-containing protein	N/A	10.1466	9.97133	10.0814	10.1066	10.1202	10.2579	10.39	12.106	12.8655	10.7337
TGME49_258180	ELMO domain-containing protein	N/A	8.2198	9.2573	9.33709	9.05676	8.61938	9.04903	8.81213	8.96794	9.55894	9.17404
TGME49_201120	ELMO/CED-12 family protein	N/A	9.47795	8.85794	8.87771	8.98059	9.34631	9.02101	9.64038	12.4974	11.3036	8.12392
TGME49_253000	ELMO/CED-12 family protein	N/A	9.72075	9.67771	9.35683	9.34887	9.37486	9.35008	8.9253	4.1407	5.85069	7.55513
TGME49_286420	elongation factor 1-alpha (EF-1-ALPHA), putative	N/A	14.4524	13.4729	15.8863	15.755	15.4075	15.3913	14.997	0.726571	2.68892	6.68272
TGME49_294800	elongation factor 1-alpha (EF-1-ALPHA), putative	N/A	13.7786	12.5981	15.9929	15.8792	15.4006	15.531	14.6834	10.958	11.6825	8.35172
TGME49_300140	elongation factor 1-gamma, putative	N/A	12.1943	10.6645	13.0061	13.5038	13.5086	12.843	13.0933	5.85723	5.56451	12.9856
TGME49_286080	elongation factor 2 family protein	N/A	10.2968	10.0888	11.4005	11.0559	10.9567	10.942	10.6472	10.3611	11.0508	9.94218
TGME49_260170	elongation factor EF-G, putative	N/A	8.40195	7.18001	9.26867	9.23202	9.27083	9.05984	8.80566	6.47662	5.81348	7.23818
TGME49_218790	elongation factor G C-terminus domain-containing protein	N/A	8.99369	8.4086	8.42587	8.39386	8.64402	8.11383	7.44934	4.66242	5.6137	5.82877
TGME49_258380	elongation factor P	EFP	9.14521	10.6337	10.3852	9.80198	9.63554	9.93316	10.155	10.1378	10.6341	6.99343
TGME49_309010	elongation factor P, putative	N/A	7.79571	3.52012	8.69149	8.74401	8.3361	8.64374	7.90377	9.26877	10.0884	8.04674
TGME49_209010	elongation factor TS protein	N/A	8.273	6.98227	8.82589	8.89713	8.80615	8.51782	8.75378	9.69061	10.1875	8.11118
TGME49_307610	elongation factor TS, putative	N/A	8.97968	9.56711	9.01091	9.31849	9.1296	9.15719	8.87258	9.67337	9.89947	10.7468
TGME49_216960	elongation factor Tu GTP binding domain-containing protein	N/A	8.81692	8.97782	8.42453	8.62956	8.35577	8.51041	8.47966	8.91486	8.87049	8.60757
TGME49_222070	elongation factor Tu GTP binding domain-containing protein	N/A	7.41145	8.12901	10.1362	10.7977	10.6326	9.53543	8.01397	10.0972	9.4859	9.38193
TGME49_228250	elongation factor Tu GTP binding domain-containing protein	N/A	9.69117	9.51044	9.79917	9.62837	9.60662	9.3845	9.10264	4.15753	4.2105	5.3319
TGME49_228350	elongation factor Tu GTP binding domain-containing protein	N/A	8.3939	3.59978	8.17624	7.95371	8.11195	7.72728	7.98879	9.09145	9.2508	7.25928
TGME49_268710	elongation factor Tu GTP binding domain-containing protein	N/A	7.89031	7.14133	8.03961	8.57201	8.56418	8.35724	8.25869	9.38537	9.19531	8.07993
TGME49_278550	elongation factor Tu GTP binding domain-containing protein	N/A	9.07316	8.07673	9.13657	9.35347	9.4551	9.16368	8.68018	5.98677	5.80355	8.20678
TGME49_301380	elongation factor Tu GTP binding domain-containing protein	N/A	9.07541	8.14528	9.03458	8.61918	8.71298	8.41292	8.19846	5.21441	5.38861	3.44139
TGME49_320150	elongation factor Tu GTP binding domain-containing protein	N/A	6.98436	8.35736	0.946493	3.28061	3.31869	3.38969	2.98787	0.691662	0	5.73613
TGME49_302050	elongation factor tu, apicoplast, putative	N/A	2.36861	2.65039	0	1.85718	0.88287	2.44371	1.62638	3.31966	5.19889	3.2897
TGME49_262380	elongation factor Tu, putative	N/A	10.2328	9.83624	11.2205	11.0861	10.8553	10.8285	10.1327	7.25211	6.88777	8.89111
TGME49_320570	elongation factor Tu, putative	N/A	10.9443	9.6256	11.7844	11.7443	11.4406	11.3956	11.3268	9.0978	8.63341	11.2521
TGME49_305480	elongator complex protein ELP3	ELP3	7.92761	7.36929	8.58941	8.43157	8.348	8.21709	7.42075	6.52796	5.62621	8.41205
TGME49_295320	embryo sac development arrest EDA7, putative	N/A	8.03674	8.43029	9.05397	9.33181	9.11971	9.04041	8.91598	11.6358	12.0265	10.0503
TGME49_290940	EMP/nonaspanin domain family protein	N/A	10.4089	10.0266	10.0656	9.9363	10.0158	10.1939	10.7195	7.33929	7.83481	9.88472
TGME49_310750	emp24/gp25L/p24 family protein	N/A	11.8272	10.969	11.2841	11.3829	11.3449	11.3095	11.5609	13.2082	13.9472	9.83852
TGME49_500045	endo-1,3(4)-beta-glucanase, putative	N/A	2.67464	6.68569	10.051	9.84494	10.3093	10.3451	10.901	13.1247	13.5889	8.72514
TGME49_283730	endomembrane protein 70 subfamily protein	N/A	9.75725	8.25403	9.24815	9.55815	9.60738	9.45234	10.0992	9.50854	9.94546	7.7636
TGME49_305920	endonuclease III family 1 protein	N/A	8.65663	9.34108	8.10129	8.0665	7.94259	8.00595	7.27837	7.61735	7.69003	6.114
TGME49_288680	endonuclease IV APN	N/A	10.4889	12.0803	10.173	10.1641	9.7676	9.97359	9.12034	9.65178	9.56134	12.0917
TGME49_238400	endonuclease/exonuclease/phosphatase domain-containing protein	N/A	10.3338	9.31306	9.32462	9.17208	9.44636	9.14399	9.57067	11.549	11.3246	9.57325
TGME49_204410	endonuclease/exonuclease/phosphatase family protein	N/A	9.47085	8.20768	7.64561	8.3035	8.69652	8.296	8.39848	6.64966	5.61696	9.43689
TGME49_232310	endonuclease/exonuclease/phosphatase family protein	N/A	8.62316	9.21332	8.5504	8.13251	8.29122	8.11075	8.45259	8.65114	8.07296	9.94819
TGME49_243590	endonuclease/exonuclease/phosphatase family protein	N/A	8.75148	7.94021	9.46444	9.04069	9.06642	9.23478	9.60035	12.5782	13.401	9.74632
TGME49_249030	endonuclease/exonuclease/phosphatase family protein	N/A	9.98466	11.3697	7.96159	8.6763	9.15501	9.37668	11.2365	14.9972	16.0094	14.0524
TGME49_259560	endonuclease/exonuclease/phosphatase family protein	N/A	9.32446	9.0113	9.7469	9.32375	9.27188	9.16717	9.322	8.53969	8.04835	9.59107
TGME49_271120	endonuclease/exonuclease/phosphatase family protein	N/A	9.97792	7.61211	9.18459	9.03345	9.33832	9.29572	9.86159	9.5712	10.7316	9.06117
TGME49_288800	endonuclease/exonuclease/phosphatase family protein	N/A	9.51093	9.55116	6.93797	8.33507	8.73052	8.41885	7.87015	9.40139	9.6852	11.3204
TGME49_293190	endonuclease/exonuclease/phosphatase family protein	N/A	10.6818	10.4713	7.73449	8.84534	9.16272	8.38504	7.46647	5.49783	7.23027	11.9174
TGME49_301216	endonuclease/exonuclease/phosphatase family protein	N/A	7.12248	8.0885	7.49652	8.12079	7.76119	7.94706	7.22545	7.10587	6.07231	8.96852
TGME49_311800	endonuclease/exonuclease/phosphatase family protein	N/A	10.5742	11.7758	5.03841	6.22123	6.51825	6.8356	6.84249	6.56281	10.8217	9.42742
TGME49_276910	endoplasmic reticulum lumen protein retaining receptor (ERD2) family protein	N/A	9.43021	9.55817	10.8843	10.4554	10.2328	10.607	10.1958	5.81591	7.08099	7.47513
TGME49_300380	endoplasmic reticulum oxidoreductin, putative	N/A	9.13109	10.1246	10.7026	10.49	10.3289	10.6973	11.1967	13.4776	13.5001	9.94907
TGME49_256000	endoplasmic reticulum retention receptor	N/A	11.7005	12.2595	12.4652	12.2952	11.9955	12.3248	12.343	13.894	14.7226	12.8899
TGME49_254740	endoribonuclease L-PSP protein	N/A	1.14104	2.01636	0.53667	1.0478	2.34503	2.25086	2.17114	5.37416	5.56451	7.10063
TGME49_207790	enkurin, putative	N/A	2.01614	1.55914	6.43347	7.01238	8.16982	9.21476	10.2598	5.5816	6.78995	7.00509
TGME49_268860	enolase 1	N/A	10.9741	16.3387	5.16057	2.79976	2.64073	3.43701	3.59786	2.61173	5.8309	4.29539
TGME49_268850	enolase 2	N/A	12.8324	9.7447	14.4499	14.603	14.4898	14.0796	14.3324	5.81622	6.25981	9.17549
TGME49_251930	enoyl-acyl carrier reductase ENR	ENR	9.71598	10.0908	10.7819	10.7784	10.472	10.7169	10.1502	8.04427	8.60353	8.15772
TGME49_202140	enoyl-CoA hydratase/isomerase family protein	N/A	3.93138	6.01164	9.71362	10.62	11.6515	11.7934	14.1827	10.4606	10.4051	8.23932
TGME49_224090	enoyl-CoA hydratase/isomerase family protein	N/A	9.9398	9.51174	9.24966	9.07624	9.0963	9.07299	9.39331	11.4586	12.4564	11.4644
TGME49_242390	enoyl-coa hydratase/isomerase family protein	N/A	0	1.55914	6.9235	8.00437	8.89707	9.50657	11.664	16.3187	16.9877	10.2971
TGME49_294190	enoyl-CoA hydratase/isomerase family protein	N/A	8.74896	9.07979	9.53201	9.51891	9.3367	9.40732	8.61912	7.32724	7.73202	10.2548
TGME49_310830	enoyl-CoA hydratase/isomerase family protein	N/A	2.67291	2.4009	7.37886	7.67808	8.38077	9.00185	11.1059	15.8928	16.5942	13.262
TGME49_317705	enoyl-CoA hydratase/isomerase family protein	N/A	8.95956	9.58796	7.65435	8.7702	9.35381	9.92316	11.7084	15.675	15.6244	11.3858
TGME49_227800	Eps15-like protein	EPS15L	9.85836	8.733	9.66991	9.6362	9.89931	9.48898	10.1203	10.3314	9.54733	8.53971
TGME49_214180	epsin-like protein EPSL	EPSL	10.6374	10.328	10.1347	10.2252	10.2317	9.98273	10.5084	12.5247	11.8912	12.1266
TGME49_224205	ER lumen protein retaining receptor, putative	N/A	10.8232	10.5591	11.1774	11.0871	11.1133	11.3116	12.2342	10.6407	10.8867	11.6964
TGME49_205740	ER membrane protein complex subunit 1, putative	EMC1	10.2667	9.3612	10.3745	10.489	10.3428	10.3717	10.897	12.9577	13.2651	8.88762
TGME49_267840	ER membrane protein complex subunit 2, putative	EMC2	10.5478	10.8194	10.4288	10.169	9.82576	9.98825	10.1368	7.9984	7.49308	10.7476
TGME49_230100	ER membrane protein complex subunit 3, putative	EMC3	9.44928	8.69273	8.96095	9.10258	9.00841	9.17959	9.03044	10.7836	11.5341	8.9482
TGME49_259000	ER membrane protein complex subunit 4, putative	EMC4	8.79925	8.0247	8.6432	8.58974	8.48941	8.62351	8.70693	6.66673	7.38296	9.09525
TGME49_239690	ER membrane protein complex subunit 6, putative	EMC6	8.78827	9.19671	8.94275	9.07926	8.71955	9.03526	8.85967	7.0076	7.72019	9.62826
TGME49_243390	ER membrane protein complex subunit 7, putative	EMC7	8.97872	7.24734	9.89899	9.55764	9.33638	9.75893	9.90834	10.8918	11.6755	10.9039
TGME49_249310	ER membrane protein complex subunit 8, putative	EMC8	8.51119	8.56514	8.82409	8.8852	8.77841	8.74709	8.72357	11.3447	10.8708	7.99356
TGME49_305310	ERCC4 domain-containing protein	N/A	9.45125	9.7267	8.9907	9.25574	9.38626	9.3443	9.57519	9.58228	8.62494	9.152
TGME49_315980	EREBP-4 family protein	N/A	8.94096	9.41686	7.39026	7.95836	8.48117	8.6187	9.346	10.296	9.52791	10.7014
TGME49_206350	ER-retrevial receptor Ter1p, putative	N/A	10.1103	10.5555	11.5658	12.1699	12.4863	12.5133	13.8902	10.0088	9.85048	13.111
TGME49_210787	Erv1 / Alr family protein	N/A	6.87785	8.41053	6.12048	7.56203	7.10995	7.40701	6.11916	0	2.58481	5.68765
TGME49_232815	Erv1 / Alr family protein	N/A	9.07761	9.53087	9.69766	9.16133	8.84397	9.03202	9.11898	10.8484	10.8712	10.1632
TGME49_288620	Erv1 / Alr family protein	N/A	9.70487	10.3601	10.8074	10.5614	10.2101	10.3788	10.0065	8.47083	9.08479	10.8144
TGME49_214760	erythronate-4-phosphate dehydrogenase domain-containing protein	N/A	6.05459	8.0431	9.02908	9.00164	8.95153	9.16699	9.03516	8.64972	8.78882	10.3719
TGME49_269442	essential light chain ELC1	ELC1	11.5177	12.4006	12.0174	12.2067	12.1161	11.8038	11.3036	3.02954	2.72838	6.81071
TGME49_305050	essential light chain ELC2	ELC2	11.9011	9.58463	6.73116	7.15631	7.53501	8.16081	8.99462	11.2465	11.3825	12.9246
TGME49_249350	esterase/lipase/thioesterase domain-containing protein	N/A	10.09	10.3945	7.97718	7.7629	7.82509	8.0516	7.88933	7.60782	7.49897	10.9853
TGME49_313240	ethylene-responsive RNA helicase, putative	N/A	9.08773	6.52896	9.66976	9.63365	9.43125	9.18714	8.33162	3.2359	4.17104	9.08406
TGME49_226800	eukaryotic glutathione synthase, atp binding domain-containing protein	N/A	7.88163	7.27664	6.21821	6.40721	6.57779	7.04019	8.98467	12.5262	12.8016	6.63749
TGME49_274190	eukaryotic initiation factor 2B epsilon subunit, putative	N/A	10.2596	8.85077	10.5628	10.4837	10.3531	10.2931	10.0038	0	0.98675	9.4577
TGME49_223410	eukaryotic initiation factor eIF4E1	EIF4E1	11.5291	12.5552	12.4441	12.4706	12.0083	12.3181	12.329	15.35	15.9853	12.8788
TGME49_315150	eukaryotic initiation factor eIF4E2	EIF4E2	9.3671	9.38071	10.4281	10.5078	10.3228	10.2217	9.71739	4.84033	5.80082	5.03063
TGME49_312560	eukaryotic initiation factor eIF4E3	EIF4E3	9.28095	8.55402	9.70218	9.66435	9.71867	9.47171	9.25123	5.55494	6.07612	4.60816
TGME49_262720	eukaryotic initiation factor-1A, putative	N/A	10.9351	11.7306	12.3017	12.4016	12.0675	12.0316	11.7453	13.6219	12.9631	12.498
TGME49_235540	eukaryotic initiation factor-2 beta, putative	N/A	11.2211	10.8793	12.2716	12.3141	11.9679	11.9288	11.6521	11.6834	11.3818	8.54587
TGME49_235970	eukaryotic initiation factor-2 gamma, putative	eIF2G	11.7276	10.6001	12.4349	12.4354	12.2209	12.0249	11.871	8.97992	8.55588	12.2198
TGME49_313230	eukaryotic initiation factor-2, alpha subunit	N/A	11.9663	11.5156	12.9058	12.8506	12.6537	12.5995	12.1537	11.3299	11.6055	7.3417
TGME49_258740	eukaryotic initiation factor-2A, putative	N/A	9.5043	8.71414	10.1023	10.3249	10.2815	9.97558	9.81184	8.65667	8.47232	9.94673
TGME49_211230	eukaryotic initiation factor-2B, alpha subunit, putative	N/A	10.0384	9.67449	9.4648	9.34077	9.21691	9.2335	9.24663	9.64917	9.71055	11.2139
TGME49_272640	eukaryotic initiation factor-2B, epsilon subunit, putative	N/A	9.51368	9.05368	8.44849	8.93483	8.9844	8.73838	7.89882	7.08826	7.44153	10.016
TGME49_216260	eukaryotic initiation factor-2B, gamma subunit, putative	N/A	10.018	9.40596	10.7582	10.4296	10.0781	10.2534	9.70984	7.58405	7.51073	10.323
TGME49_201680	eukaryotic initiation factor-3 subunit 10, putative	N/A	11.5693	10.7054	12.4417	12.2938	12.2057	12.0958	11.6524	5.88308	5.14214	9.81634
TGME49_289830	eukaryotic initiation factor-3, delta subunit, putative	N/A	11.3864	10.3317	12.0573	12.1495	11.8463	11.723	11.3175	11.0506	11.8112	11.2739
TGME49_251500	eukaryotic initiation factor-3, subunit 3, putative	N/A	10.8876	9.72777	11.598	11.6508	11.5409	11.2293	11.0863	8.68351	7.52529	9.07484
TGME49_228190	eukaryotic initiation factor-3, subunit 5, putative	N/A	10.9313	9.15111	11.7271	11.7294	11.4206	11.4353	10.8798	3.84861	4.18653	8.85154
TGME49_294620	eukaryotic initiation factor-3, subunit 8, putative	N/A	11.3552	11.0561	12.9206	12.9014	12.6478	12.6188	12.1417	6.44582	6.47131	11.3538
TGME49_250770	eukaryotic initiation factor-4A, putative	N/A	13.3686	13.291	15.2988	15.1901	14.5677	14.7101	13.8941	12.5593	13.5924	9.77353
TGME49_244650	eukaryotic initiation factor-5, putative	N/A	11.2136	10.9701	12.1929	12.1292	11.9479	12.1902	12.2243	15.1061	15.6253	12.5415
TGME49_318700	eukaryotic initiation factor-6, putative	N/A	10.2141	9.79235	10.7218	10.757	10.4724	10.5734	10.0528	9.51822	9.73844	11.7552
TGME49_304710	eukaryotic peptide chain release factor, putative	N/A	10.8118	10.1773	11.7392	11.7401	11.4763	11.3199	11.3363	13.7222	13.98	9.06367
TGME49_313060	eukaryotic translation initiation factor 2B, putative	N/A	9.87071	9.19925	9.63259	9.43484	9.47045	9.26614	8.80878	7.70822	7.1022	11.5275
TGME49_273460	eukaryotic translation initiation factor 3 subunit 6 interacting protein	N/A	11.963	11.1872	12.7453	12.7448	12.4301	12.457	11.9764	8.20557	8.27227	10.5158
TGME49_317720	eukaryotic translation initiation factor 3 subunit 7, putative	N/A	12.1622	11.6193	13.0486	12.9502	12.5723	12.7277	12.1681	13.8371	13.8418	12.9043
TGME49_222860	eukaryotic translation initiation factor 3 subunit B, putative	N/A	11.9501	11.4794	13.4399	13.3078	12.8541	12.8696	12.3792	12.1725	11.7935	12.0613
TGME49_273520	eukaryotic translation initiation factor 3 subunit E, putative	N/A	11.5833	11.1098	12.6265	12.5391	12.2863	12.2388	12.1556	14.4696	14.9193	12.0112
TGME49_294670	eukaryotic translation initiation factor 3 subunit G, putative	N/A	11.053	10.7791	11.7904	11.888	11.6463	11.3578	11.0997	8.05539	7.65698	11.4505
TGME49_256770	eukaryotic translation initiation factor 4A, isoform 3, putative	N/A	10.8545	10.4597	11.7331	11.7717	11.4666	11.6057	11.1843	9.07809	8.60645	11.3054
TGME49_257350	eukaryotic translation initiation factor, putative	N/A	11.0011	9.89658	11.1454	11.4607	11.466	11.1748	11.147	9.77432	9.30156	12.7514
TGME49_232360	exonuclease	N/A	10.5299	10.6918	9.38311	8.89755	9.23474	9.05981	8.84478	8.77103	7.81463	10.4936
TGME49_237020	exonuclease	N/A	9.06085	8.89691	9.28409	9.19912	9.04586	9.06149	8.90659	9.59547	9.24079	10.3408
TGME49_295060	exonuclease	N/A	7.91957	8.75138	8.35099	8.13076	7.72488	8.09781	7.48219	6.02954	6.70406	7.42249
TGME49_216600	exonuclease III APE	APE	9.10637	8.75138	8.96562	8.81572	8.68529	8.85727	8.76173	8.78716	8.72275	9.6399
TGME49_215550	exonuclease V, putative	N/A	9.52821	8.24081	8.48791	8.01296	8.15714	8.46702	9.2623	12.8891	13.5535	6.8567
TGME49_320440	exoribonuclease, putative	N/A	9.23257	8.00323	9.09299	8.72806	8.80141	8.84121	8.92707	5.35207	4.85712	4.40847
TGME49_327600	exoribonuclease, putative	N/A	4.38144	0	0	2.82276	4.76992	2.42962	5.10425	2.77495	2.55299	0
TGME49_312400	exosomal 3'-5' exoribonuclease complex subunit, putative	N/A	7.75978	6.46959	9.0994	8.89839	8.6084	8.73562	7.82248	4.2117	5.37231	9.70242
TGME49_286550	exosome complex component RRP43, putative	RRP43	8.32954	9.517	9.57745	9.74824	9.23456	9.75135	9.93275	13.5645	13.8573	9.73932
TGME49_213930	exosome complex component RRP45, putative	N/A	8.62797	7.70975	8.36088	9.21997	9.10882	8.76083	8.36821	8.34917	8.92575	8.33123
TGME49_261050	exosome complex exonuclease RRP44, putative	N/A	9.26201	8.92847	10.0937	9.77294	9.47397	9.65121	8.80205	3.61109	2.50452	9.02556
TGME49_224860	exosome component 2, putative	N/A	8.60339	8.85784	9.27625	9.43934	9.18577	9.51467	10.1429	14.293	14.4964	9.72999
TGME49_249530	exportin 1, putative	N/A	11.448	10.8567	11.848	11.6256	11.534	11.5208	11.4427	10.0081	10.1724	11.6165
TGME49_214830	exportin-T, putative	N/A	8.4658	7.81372	8.72216	9.02147	9.15924	9.16169	9.5927	12.7264	12.5221	7.81854
TGME49_212830	expressed protein JLP1	N/A	0	1.13777	0	2.10849	1.86562	1.39546	1.03117	2.76693	2.42533	2.44101
TGME49_205658	F5/8 type C domain-containing protein	N/A	3.06221	2.16846	2.90671	4.0403	4.95144	5.74056	6.58235	15.5807	17.1866	9.48036
TGME49_223700	F5/8 type C domain-containing protein	N/A	0.696953	2.16846	0.946493	3.99525	4.43802	4.91709	3.05412	16.0019	17.6089	9.25913
TGME49_264070	F5/8 type C domain-containing protein	N/A	3.24567	5.86619	8.18302	8.21717	7.87483	6.88261	3.7495	16.0168	17.461	9.49482
TGME49_214320	facilitative glucose transporter GT1	GT1	12.1907	13.2043	13.8324	13.7282	13.515	13.5232	12.5328	6.36906	9.08566	11.7798
TGME49_208390	F-actin-capping protein subunit alpha, putative	N/A	8.92018	9.35135	8.89704	9.18189	8.90717	9.12732	9.01285	4.2829	7.21713	6.90339
TGME49_219290	F-actin-capping protein subunit beta, putative	N/A	9.25483	7.99242	8.83305	8.84203	8.7556	8.77404	9.00366	9.36615	8.92481	9.57314
TGME49_206400	FAD binding domain of DNA photolyase domain-containing protein	N/A	3.02528	4.26961	5.59306	6.54162	7.18558	8.01405	9.89541	14.6641	15.3893	13.4667
TGME49_220360	FAD binding domain-containing protein	N/A	9.29203	8.7309	7.97159	8.48786	8.88971	8.40944	9.33422	13.5052	13.4409	9.27612
TGME49_232540	FAD binding domain-containing protein	N/A	9.66208	8.90191	9.59379	9.59947	9.37982	9.42667	9.07678	10.6697	9.69622	5.89225
TGME49_283760	FAD-binding domain-containing protein	N/A	8.02379	8.51896	7.89999	8.27949	8.51867	8.28809	7.73936	6.91882	6.0703	3.64917
TGME49_263730	FAD-dependent glycerol-3-phosphate dehydrogenase	N/A	10.3142	10.1339	10.5936	10.2002	10.2206	10.2795	10.2858	6.25759	6.32854	8.93717
TGME49_207965	FAD-dependent oxidoreductase, putative	N/A	2.78203	2.65039	10.9082	10.8642	11.6418	11.9887	14.054	17.8385	18.9751	11.4717
TGME49_203900	FAM184 domain-containing protein	N/A	0	4.09957	5.87636	7.08902	7.76485	8.2823	9.10889	7.21999	7.55575	6.06341
TGME49_286430	FAM221 domain-containing protein	N/A	8.28593	8.73559	7.99565	7.89375	7.6834	7.91783	8.14589	10.1807	10.7342	11.2097
TGME49_202568	FAM32A domain-containing protein	N/A	7.11967	3.17593	7.825	7.54099	7.3643	7.54402	7.10874	1.15231	2.38953	8.0576
TGME49_209280	FAM76 domain-containing protein	N/A	9.09277	8.68222	10.0698	9.74393	9.82342	9.76768	9.19215	10.4644	10.7443	9.7655
TGME49_293230	FAM98 domain-containing protein	N/A	8.47258	8.01407	8.50278	8.70269	8.72166	8.42792	8.85178	10.0918	10.2988	10.5992
TGME49_224490	farnesyl/geranylgeranyl diphosphate synthase	FPPS	8.59305	8.03299	8.8383	8.74084	8.61921	8.65489	8.83374	8.96433	8.84253	6.80574
TGME49_285272	FAS1 domain-containing protein	N/A	7.41187	6.63241	8.26658	8.03591	8.03227	7.73306	8.01231	8.68189	7.93505	7.72458
TGME49_306050	FAS1 domain-containing protein	N/A	1.42525	3.36488	8.86443	10.2665	10.7995	11.6368	13.7381	12.3205	11.6995	7.75845
TGME49_223830	fasciclin domain-containing protein	N/A	2.03048	3.49164	10.5484	11.3151	12.0166	12.0883	13.962	15.8821	16.4377	9.79183
TGME49_242380	fatty acid elongase	N/A	10.6419	10.7993	12.4727	12.3758	11.8341	12.2646	12.2821	15.4464	16.4653	11.1626
TGME49_500322	fatty acyl-AMP ligase, putative	N/A	9.64218	10.1539	7.8792	8.35133	8.87708	9.12161	10.4946	13.1148	13.7495	10.4446
TGME49_500101	fatty acyl-CoA reductase, putative	N/A	5.26819	8.49031	9.82259	10.62	11.1911	11.4905	13.15	11.6348	11.5769	8.48461
TGME49_215210	F-box domain-containing protein	N/A	8.86442	10.6364	8.7343	8.56154	8.66097	8.62813	8.01688	7.24199	8.07565	12.4981
TGME49_261370	F-box domain-containing protein	N/A	9.17762	8.16098	8.41869	8.74923	9.34109	8.76666	9.48351	5.03802	5.90906	9.98688
TGME49_275780	F-box domain-containing protein	N/A	7.87441	7.85373	7.30877	7.87623	7.67756	7.50051	7.51432	8.46406	6.97073	8.85943
TGME49_299230	F-box domain-containing protein	N/A	4.3316	2.77885	8.06292	8.79889	9.67942	10.0964	12.3464	13.1891	12.6806	11.4304
TGME49_305630	F-box domain-containing protein	N/A	6.27713	6.22758	8.39442	8.19852	8.46405	8.44647	8.78191	11.8947	11.6415	4.45185
TGME49_500384	F-box domain-containing protein	N/A	4.46083	6.46263	5.77646	7.22261	7.9594	8.2175	9.48186	9.95759	10.0827	7.03513
TGME49_310930	F-box protein FBXO1	FBXO1	9.80805	9.30556	9.19292	9.77324	9.66456	9.35332	9.50365	9.36741	8.74232	9.27913
TGME49_313200	F-Box Protein L2	FBXL2	8.95441	8.01664	8.72302	8.27287	8.14236	8.04609	8.28755	7.69482	6.77835	6.48319
TGME49_211470	Fcf2 pre-rRNA processing protein	N/A	6.88163	3.38124	7.50426	8.13972	8.0397	7.86227	6.92535	5.96714	6.98575	6.04253
TGME49_309420	ferlin 1	FER1	8.62385	9.22736	9.47664	8.85572	8.56576	8.73828	7.79853	7.66654	7.98768	10.4891
TGME49_260470	ferlin 2	FER2	11.0931	11.555	9.4558	8.90671	8.5077	8.82181	8.03422	5.6739	7.74363	12.4783
TGME49_500058	ferlin 3, putative	FER3	10.3868	10.0982	5.24108	4.75715	5.55839	6.35159	6.78025	8.52399	9.92983	9.01217
TGME49_215070	ferredoxin FD	FD	9.9664	9.23267	9.81339	9.95468	9.7581	9.60046	9.16636	7.42792	7.77494	10.1792
TGME49_298990	ferredoxin NADP+ oxidoreductase FNR	N/A	9.50287	9.41801	9.54324	9.34715	8.98716	9.20806	8.46877	2.52826	4.57867	8.59178
TGME49_236000	ferredoxin, putative	N/A	7.71611	8.21754	8.8538	8.91105	8.83855	8.77898	9.34335	12.1036	11.2199	10.3398
TGME49_210750	Ferredoxin-fold anticodon binding domain-containing protein	N/A	7.78748	8.84653	9.93743	9.70898	9.50564	9.74356	9.9641	11.4314	11.8828	8.81057
TGME49_258650	ferrochelatase	FC	8.7385	9.18172	9.07453	9.3208	9.10514	9.23166	8.82807	7.77177	8.448	8.81163
TGME49_318590	Fe-S cluster assembly factor HCF101	HCF101	8.12476	8.33876	7.98919	8.05204	7.67141	7.86642	7.71551	10.6009	10.1923	9.88504
TGME49_288685	Fe-S protein assembly co-chaperone HscB protein	N/A	9.05337	9.83458	7.0297	7.80376	7.79096	7.76928	6.38543	5.84151	6.15374	9.79547
TGME49_269650	FFD and TFG box motifs protein	N/A	10.9519	10.4915	11.887	11.7605	11.5807	11.6823	10.9628	3.73538	4.3713	10.505
TGME49_301450	FG-GAP repeat-containing protein	N/A	9.71972	8.66258	9.07449	9.10848	9.28822	9.16387	9.65366	9.455	8.69	8.73716
TGME49_202840	FHA domain-containing protein	N/A	12.2301	11.0902	10.5232	10.8855	11.0563	10.7473	11.3625	13.3549	13.2645	11.5224
TGME49_203830	FHA domain-containing protein	N/A	9.51685	7.73104	9.88556	10.0832	10.6516	10.4972	12.5095	16.0582	16.4382	9.60444
TGME49_208310	FHA domain-containing protein	N/A	8.655	9.18489	8.78467	9.05978	8.79556	8.91873	8.40833	9.26445	8.57231	10.2452
TGME49_262780	FHA domain-containing protein	N/A	9.9735	8.84739	9.72376	9.62907	9.89018	9.8608	10.7002	13.4096	12.9391	9.05247
TGME49_267600	FHA domain-containing protein	N/A	9.56698	8.86247	10.8623	10.8771	10.8197	10.7713	9.95525	9.65957	8.77635	10.0338
TGME49_287980	FHA domain-containing protein	N/A	9.59837	9.55589	9.9928	10.0586	10.6201	10.4531	12.4464	13.7897	13.9562	10.3058
TGME49_311430	fibrillarin	N/A	10.8066	11.2945	12.1555	12.0053	11.6844	11.8857	10.5686	7.29254	7.65943	10.5109
TGME49_289050	FIKK kinase, putative	N/A	8.8738	9.97873	9.06383	9.36985	10.267	10.0949	11.3803	12.1941	12.8153	10.0355
TGME49_271780	Filamin/ABP280 repeat-containing protein	N/A	10.147	8.29966	8.21521	7.50721	7.4427	7.34492	6.59686	4.12839	7.82077	9.4131
TGME49_285990	Filamin/ABP280 repeat-containing protein	N/A	9.10139	9.12228	7.41865	7.65468	7.20765	7.91821	9.71867	13.5711	13.9183	11.032
TGME49_312980	flagella associated protein, putative	N/A	0	0	6.37132	7.19087	8.41672	9.26237	10.207	6.08456	6.11265	1.09907
TGME49_224040	flagellar associated protein	N/A	1.42525	5.75473	6.85023	6.59213	7.52031	8.0581	8.99988	1.27126	2.6959	1.22016
TGME49_258530	flagellar associated protein	N/A	0.227194	1.13777	5.02354	6.03377	7.70751	8.51198	9.52132	3.29386	6.32966	5.30269
TGME49_264178	flagellar associated protein	N/A	4.1933	7.77084	6.89756	7.63833	8.33849	8.982	10.0862	9.79012	10.1185	9.19192
TGME49_273530	flagellar associated protein	N/A	0.843801	5.06404	5.80012	5.83355	6.78647	6.9919	8.18633	3.66738	6.43716	3.71811
TGME49_284670	flagellar associated protein	N/A	0	3.36126	5.43598	6.52291	7.66244	8.49066	9.56344	9.6049	10.4842	3.67739
TGME49_216800	flagellar/basal body protein	N/A	7.20183	6.94193	6.34387	5.63239	6.1353	6.45764	7.24827	6.67277	7.19135	4.96499
TGME49_265780	flagellar/basal body protein	N/A	9.53297	7.75618	6.03039	6.43189	7.36904	7.49587	8.62349	7.20428	6.29626	2.63005
TGME49_310480	flagellar/basal body protein, PACRG family protein	N/A	0	0	4.89857	5.14501	6.27937	7.29304	8.07108	10.1616	11.0279	3.95385
TGME49_251620	flap structure-specific endonuclease 1, putative	N/A	9.93094	9.25675	9.11192	8.92544	8.75039	8.76757	8.80806	12.2288	12.1465	9.72676
TGME49_219630	flavodoxin domain-containing protein	N/A	9.957	8.41698	7.84406	8.19219	8.46041	8.25588	8.07945	9.57937	9.96205	11.0205
TGME49_249320	flavodoxin domain-containing protein	N/A	8.56802	7.91623	8.32088	8.69477	8.93177	8.56584	8.23996	7.70401	7.78163	7.65374
TGME49_215590	flavoprotein subunit of succinate dehydrogenase SDHA	SDHA	11.1631	9.9105	11.7011	11.9805	12.0153	11.4999	11.5591	2.25239	3.67407	9.47639
TGME49_260220	folate/biopterin transporter subfamily protein	N/A	10.441	9.61359	9.07205	8.61108	8.92327	9.02356	10.0468	12.4839	11.3912	11.6124
TGME49_231420	folate/biopterin transporter, putative	N/A	0	0	1.83896	1.2817	2.50451	2.48229	0.80363	14.7249	16.3643	8.09134
TGME49_267560	folate-binding protein YgfZ protein	N/A	8.74887	7.97373	7.63671	8.05838	8.39064	8.17693	9.21169	5.87086	3.97693	7.58035
TGME49_297430	FoP domain-containing protein	N/A	12.3885	12.591	12.0424	12.1277	11.8144	11.9011	11.5375	12.9668	13.7186	13.6089
TGME49_209800	formate/nitrite transporter FNT1	FNT1	10.3116	9.90306	11.5879	11.4145	11.1418	11.1171	10.3298	1.36455	1.94453	7.98644
TGME49_292110	formate/nitrite transporter FNT2	FNT2	9.66476	4.25018	5.8193	5.69652	5.81385	6.47252	7.70678	8.88583	12.1695	10.5696
TGME49_229170	formate/nitrite transporter FNT3	FNT3	5.75373	2.83541	7.01214	8.33906	8.94125	9.17711	10.2281	0	0.446648	6.43582
TGME49_206430	formin FRM1	FRM1	10.5978	10.9288	9.03603	8.66771	8.62542	8.89363	8.0481	7.43761	9.10279	8.15287
TGME49_206580	formin FRM2	FRM2	8.56197	8.60445	8.68471	8.56369	8.75423	8.74745	9.11666	5.62292	4.22669	9.21239
TGME49_213370	formin FRM3	FRM3	8.91478	8.6881	8.00924	8.07213	8.40062	8.16636	9.07559	12.3168	11.7936	6.7209
TGME49_235640	formyl transferase domain-containing protein	N/A	7.68339	9.98174	10.4444	9.29135	9.16264	9.63868	8.36397	6.24934	6.52005	8.54997
TGME49_205380	fructose-1,6-bisphosphatase 1	FBP1	11.0357	11.2665	12.5902	12.5785	12.2719	12.5455	12.2062	9.58923	10.2051	7.12971
TGME49_247510	fructose-1,6-bisphosphatase 2	FBP2	11.3017	12.2492	13.2248	13.0007	12.5757	12.9841	12.3325	10.8769	11.6313	11.8353
TGME49_236040	fructose-1,6-bisphosphate aldolase	N/A	13.6311	13.8087	14.3497	14.478	14.38	14.1005	14.1907	15.0299	14.998	15.0112
TGME49_321900	fructose-1,6-bisphosphate aldolase	N/A	0	0	0	3.94842	4.67049	0.234717	0	0	0	6.10973
TGME49_236050	fructose-bisphosphate aldolase, putative	N/A	1.55771	2.01636	8.23611	9.16297	9.98939	10.4413	11.4772	6.84675	6.87691	8.74338
TGME49_267330	fumarate hydratase	N/A	9.759	9.77677	10.9517	10.7625	10.4856	10.6625	10.4603	11.7554	11.1465	9.32814
TGME49_311680	FUN14 family protein	N/A	10.489	10.3869	10.4725	10.3262	10.0483	10.4296	9.87849	8.79183	9.71598	10.4745
TGME49_216670	FUSE-binding protein 2 / KH-type splicing regulatory protein	FUBP2	11.3362	10.2632	11.7824	12.0845	12.3691	11.8323	12.497	8.7435	9.27477	10.9704
TGME49_264050	fused toes protein homolog FTS	FTS	8.47175	9.8273	7.52996	8.16515	8.2295	8.36457	8.19369	9.5121	10.2708	10.2282
TGME49_237870	FYVE zinc finger domain-containing protein	N/A	7.97166	8.02359	6.33801	7.28706	7.50041	7.17399	7.96057	8.11071	7.34632	9.66999
TGME49_500179	FYVE zinc finger domain-containing protein	PIKfyve	9.27409	8.74987	9.0153	8.6749	8.95237	8.92597	9.0472	8.83207	7.68249	7.20383
TGME49_286490	G protein-coupled receptor 89 isoform 5, putative	N/A	9.47568	9.70963	9.43733	9.22466	9.02912	9.60242	9.53298	8.9239	10.1281	11.3223
TGME49_246620	G10 family protein	N/A	8.93877	8.89012	9.52424	9.62646	9.35069	9.38126	9.00909	5.30094	6.04988	8.55037
TGME49_270800	GAF domain-containing protein	N/A	9.52596	7.64141	6.81271	7.11387	7.54414	7.29532	8.72102	12.7175	13.6805	11.1463
TGME49_500224	GAF domain-containing protein	N/A	6.10415	6.88688	8.0101	8.78424	9.26773	9.45053	10.7486	11.3806	11.8937	6.54331
TGME49_259530	GalNac	N/A	9.8088	10.2673	10.6013	10.3823	10.2354	10.7212	10.7327	12.917	13.1882	10.3811
TGME49_315250	GAMM1 protein, putative	N/A	9.40883	9.34481	10.255	10.2725	9.7873	10.0758	9.03044	6.91242	6.45455	6.70624
TGME49_261630	gamma interferon inducible lysosomal thiol reductase (GILT) protein	N/A	0	0	1.245	4.60806	5.46722	5.05846	6.1753	14.8721	16.1932	8.52711
TGME49_291600	gamma interferon inducible lysosomal thiol reductase (GILT) protein	N/A	10.4577	10.9232	9.49849	9.7048	9.97433	9.75244	10.5506	13.6869	13.5292	14.4004
TGME49_243350	gamma-glutamyl hydrolase	N/A	10.1564	11.658	8.08848	7.89057	8.60509	8.82808	10.2307	11.8056	12.3227	13.1878
TGME49_270550	gamma-glutamyl phosphate reductase, putative	N/A	9.01457	8.48457	7.25484	7.36266	7.89926	8.50559	10.0566	13.6392	13.8694	8.00076
TGME49_320690	gamma-soluble NSF attachment protein, putative	N/A	8.60548	9.40925	9.05746	8.68057	8.40134	8.79255	8.75178	11.6578	12.2718	9.52991
TGME49_285780	gamma-tubulin complex component, putative	N/A	8.82964	7.7857	7.40697	7.65919	7.94268	7.77346	8.53028	7.98036	6.38536	3.5038
TGME49_310130	gamma-tubulin complex component, putative	N/A	9.64011	8.90825	8.82253	9.10453	9.16082	8.67666	8.99504	9.2752	8.41652	9.14981
TGME49_249850	GAP40 protein	GAP40	13.4265	12.2266	12.7851	13.0256	12.8444	12.6814	12.2059	7.00006	7.49046	10.4033
TGME49_272010	Gar1 protein RNA binding region protein	N/A	9.56793	9.12793	10.8019	10.8758	10.5896	10.7508	9.781	0	2.85367	10.4998
TGME49_215730	Gas41, putative	N/A	9.36885	9.50484	9.44454	9.44628	9.15538	9.28959	8.63165	3.49947	3.12383	9.4237
TGME49_217650	GAS8 domain-containing protein	N/A	0.227194	0	5.39187	5.97727	7.17861	7.72925	8.55022	8.46212	8.41229	5.21831
TGME49_283840	GATA zinc finger domain-containing protein	N/A	3.67664	0	7.07314	7.44044	8.29611	8.28116	9.68248	3.40023	0	2.95867
TGME49_500025	GCC2 and GCC3 domain-containing protein	N/A	10.0978	8.10032	8.69119	9.17479	10.1163	10.1074	11.2245	10.7768	10.3845	8.92811
TGME49_500148	GCC2 and GCC3 domain-containing protein	N/A	9.79198	10.9479	8.69459	9.39387	9.96278	10.2485	11.1077	10.4683	11.2148	9.65549
TGME49_500222	GCC2 and GCC3 domain-containing protein	N/A	9.82496	8.03434	7.67163	8.99145	9.91138	9.79073	11.0717	10.2264	10.0805	9.80101
TGME49_231480	GCN1, putative	N/A	9.78696	8.87739	10.0853	10.2881	10.478	10.2064	10.3215	9.45591	8.72847	7.48312
TGME49_225290	GDA1/CD39 (nucleoside phosphatase) family protein	N/A	9.64223	12.7367	3.56084	5.79532	6.16619	6.48556	7.15702	9.86942	10.3423	5.37532
TGME49_277720	GDA1/CD39 (nucleoside phosphatase) family protein	N/A	11.223	10.2696	8.15099	8.65816	8.83195	8.29732	8.03052	7.92581	8.73964	7.28315
TGME49_278878	GDA1/CD39 (nucleoside phosphatase) family protein	N/A	6.99486	8.41984	8.7652	9.0821	9.34003	9.36357	10.5322	13.1578	14.0533	8.41552
TGME49_278882	GDA1/CD39 (nucleoside phosphatase) family protein	N/A	4.76211	12.3835	0.946493	3.7761	4.77149	4.41246	6.58347	5.45361	6.75483	5.74013
TGME49_307800	GDA1/CD39 (nucleoside phosphatase) family protein	N/A	8.80198	9.40835	9.70581	9.70643	9.36976	9.55274	9.22953	8.47625	8.74427	11.0072
TGME49_238940	GDP mannose 4,6-dehydratase, putative	N/A	9.27853	8.29853	9.67465	9.44484	9.35396	9.80059	10.1639	11.7498	12.3255	6.57523
TGME49_257960	GDP-D-mannose pyrophosphorylase	N/A	9.90509	9.31084	9.62881	9.7939	9.53468	9.57996	10.3356	13.6868	14.5765	8.9311
TGME49_273550	GDP-fucose protein O-fucosyltransferase 2	POFUT2	8.97913	9.36617	8.6503	8.27798	8.17763	8.34325	8.27684	5.69565	7.02788	5.02529
TGME49_267730	GDP-fucose transporter NST2	N/A	8.23374	8.7194	8.49155	8.64955	8.54637	8.72544	8.27441	9.27638	9.01297	10.1002
TGME49_286220	GDP-L-fucose synthetase	N/A	6.89812	7.52605	8.33604	8.19725	8.03718	8.08245	7.53939	3.38063	4.06577	3.22294
TGME49_231010	general transcription factor IIE polypeptide 1 GTF2E1	GTF2E1	8.84926	8.52425	8.76626	8.94722	8.95237	8.74485	8.85015	12.1556	12.5337	10.473
TGME49_294920	general transcription factor IIH polypeptide 2 GTF2H2	GTF2H2	9.35843	7.66091	8.77805	8.73505	8.87294	8.74382	8.46147	8.34853	7.92849	10.4406
TGME49_266930	general transcription factor IIH polypeptide 3 GTF2H3	GTF2H3	8.49453	7.7798	8.50259	8.63304	8.64082	8.53969	8.74102	7.54741	6.54906	9.52619
TGME49_214520	general transcription factor IIH polypeptide 4 GTF2H4	GTF2H4	8.43885	8.35575	7.37071	7.95858	7.92157	7.73313	7.36508	6.21023	6.21587	4.32352
TGME49_217450	general transcription factor IIH polypeptide 5 GTF2H5	GTF2H5	7.79907	9.1353	8.33308	8.7708	8.25506	8.49682	7.72571	10.5754	11.1802	10.9539
TGME49_314240	general transcription factor IIIC polypeptide 3 GTF3C3	GTF3C3	9.98203	10.6876	8.89138	9.28275	9.3634	9.24154	8.27302	7.81419	8.32348	10.4265
TGME49_247270	GEX1 domain-containing protein	N/A	5.09476	3.32829	7.9852	8.21535	9.22113	9.37173	11.5309	12.0097	12.0526	8.68447
TGME49_229780	GHMP kinase, N-terminal domain-containing protein	N/A	9.66942	7.12246	8.17923	8.45626	8.62017	8.39379	9.08631	8.0124	6.91338	4.53615
TGME49_216640	GHMP kinase, putative	N/A	7.49174	7.66301	6.45526	7.42269	8.42266	8.95209	11.533	16.1553	17.1376	11.7004
TGME49_255920	GINS complex subunit Psf3, putative	N/A	8.57147	8.86378	8.24218	8.13076	7.94769	8.16	8.79116	10.2784	10.4518	8.8754
TGME49_212170	GIY-YIG catalytic domain-containing protein	N/A	8.73151	7.95208	8.19825	8.40802	8.52679	8.53611	9.3129	11.3776	11.7299	7.90337
TGME49_312630	glideosome-associated connector GAC	GAC	12.1921	11.9924	11.0179	11.8228	12.5537	11.7558	11.0127	4.68654	7.51346	12.4818
TGME49_202500	glideosome-associated protein with multiple-membrane spans GAPM1A	GAPM1A	13.5909	12.5238	11.3216	11.9359	11.865	11.4665	10.66	3.50409	8.29819	9.49442
TGME49_202510	glideosome-associated protein with multiple-membrane spans GAPM1B	GAPM1B	9.62678	10.0904	11.9536	11.7024	11.1792	11.4136	10.8162	4.68741	2.90144	3.99962
TGME49_219270	glideosome-associated protein with multiple-membrane spans GAPM2A	GAPM2A	13.3461	11.5301	12.4882	12.7839	12.6392	12.2472	11.9765	12.9349	14.0656	8.98376
TGME49_206690	glideosome-associated protein with multiple-membrane spans GAPM2B	GAPM2B	10.678	10.4046	8.62014	9.32294	9.29837	8.8522	7.8201	4.97336	7.84094	10.5047
TGME49_271970	glideosome-associated protein with multiple-membrane spans GAPM3	GAPM3	13.8034	12.6197	12.8043	12.9532	12.7535	12.5605	12.0943	13.3315	14.0946	10.7154
TGME49_223940	gliding-associated protein GAP45	GAP45	12.9657	11.3863	11.637	12.2988	12.2445	11.7522	11.463	11.1761	11.9444	12.344
TGME49_219320	gliding-associated protein GAP50	GAP50	13.2991	11.6313	12.684	12.8807	12.6551	12.4713	11.811	5.90698	7.98191	10.7904
TGME49_233030	gliding-associated protein GAP70	GAP70	12.6087	11.9894	4.79242	5.51215	5.95019	5.61997	5.67516	5.8747	8.58321	12.4086
TGME49_246940	gliding-associated protein GAP80	GAP80	12.4352	13.4108	8.1634	8.77764	9.04462	8.74615	7.42012	4.83404	5.89671	14.4345
TGME49_205290	glucan phosphatase Laforin	N/A	9.04654	9.22198	10.0923	10.2622	10.4023	10.5859	11.2458	14.1562	14.0032	12.2145
TGME49_231350	glucosamine-fructose-6-phosphate aminotransferase	N/A	9.40726	7.8857	9.65011	9.71481	10.076	9.76282	11.1497	14.3178	14.3416	7.27984
TGME49_242010	glucose inhibited division protein A subfamily protein	N/A	8.56195	8.72729	7.92197	7.89705	7.90521	7.74799	7.26794	3.60642	3.55582	2.8089
TGME49_278830	glucose-6-phosphate 1-dehydrogenase	N/A	12.1544	11.0719	9.93939	10.1243	10.2897	10.257	11.4027	10.8608	10.5432	15.2273
TGME49_294200	glucose-6-phosphate 1-dehydrogenase	N/A	12.5839	11.1734	2.74881	5.06131	5.21608	5.9938	7.19495	12.5202	12.8115	10.7216
TGME49_283780	glucose-6-phosphate isomerase GPI	GPI	12.3767	14.9455	12.5159	12.3732	12.2366	12.4072	12.2921	6.35362	6.47217	11.8331
TGME49_265010	glutamate 5-kinase domain-containing protein	N/A	10.1858	10.6798	7.40119	7.76114	8.59898	8.89067	11.2862	15.3286	15.925	9.8586
TGME49_280700	glutamate decarboxylase	GAD	10.2179	10.3642	8.55627	9.07805	9.80607	9.63721	11.4497	10.836	10.4153	11.9884
TGME49_249390	glutamate/leucine/phenylalanine/valine dehydrogenase family protein	N/A	12.1856	11.2078	13.2704	13.0756	13.1912	13.1331	13.3931	13.0602	12.6057	14.1374
TGME49_232590	glutamate-cysteine ligase, catalytic subunit domain-containing protein	N/A	9.75241	11.242	8.09068	8.8238	9.64566	10.2496	12.6689	15.3211	16.002	12.9515
TGME49_263870	glutamate-tRNA ligase	N/A	10.4821	10.5418	11.4019	11.4197	11.1624	11.1267	10.8391	12.1356	12.2777	7.01331
TGME49_210760	glutamine amidotransferase-related, putative	N/A	8.72808	9.28827	8.80542	9.3226	8.99823	9.56773	9.98961	12.766	12.8756	11.5618
TGME49_273490	glutamine synthetase, type I, putative	N/A	9.87919	8.83325	11.247	11.2246	11.0244	11.4052	12.5258	16.6982	16.3611	11.5808
TGME49_269800	glutamine-dependent NAD(+) synthetase protein, putative	N/A	10.2843	9.83895	8.46951	8.71973	8.17907	8.42677	7.44626	2.1327	2.85367	11.7756
TGME49_258020	glutaminyl-peptide cyclotransferase, putative	N/A	6.89414	6.29114	7.96194	8.03081	8.74534	8.62611	10.6516	11.9399	12.5598	7.08251
TGME49_217460	glutaminyl-tRNA synthetase (GlnRS)	N/A	10.5276	10.5788	12.1477	12.0088	11.8152	11.8578	11.2923	2.81881	3.78168	8.00461
TGME49_268730	glutaredoxin 1	GRX1	8.29613	9.17285	9.54257	9.21649	8.85789	9.14671	8.84735	10.0737	10.6122	10.6828
TGME49_279400	glutaredoxin 2	GRX2	10.1013	10.457	11.7097	11.6453	11.19	11.4243	11.1305	10.0938	10.1395	11.8941
TGME49_247580	glutaredoxin 3	GRX3	9.37855	8.82092	9.02751	8.54362	8.29096	8.73555	8.00605	9.681	9.57351	7.71219
TGME49_227150	glutaredoxin 4	GRX4	10.361	10.4857	10.2189	10.3499	9.9974	9.98543	9.15735	4.74409	5.29022	9.06751
TGME49_227100	glutaredoxin 5	GRX5	2.36181	9.34977	4.75302	5.72962	6.27992	7.92072	9.43849	12.309	13.416	17.546
TGME49_238070	glutaredoxin domain-containing protein	N/A	9.15534	8.83967	10.157	9.90756	9.4841	9.64837	9.10225	6.40112	6.36458	10.9048
TGME49_246920	glutathione reductase	N/A	8.93177	8.71414	10.0716	10.0415	9.69626	9.89427	9.6546	6.53354	6.67177	8.13633
TGME49_249630	glutathione S-transferase 1	GST1	8.37427	8.76402	8.60507	8.44476	8.74873	8.66314	9.13303	10.4512	10.6573	10.841
TGME49_306030	glutathione S-transferase 2	GST2	10.5746	10.52	10.4047	9.97197	9.8831	10.1783	10.1216	1.82634	1.74134	7.15159
TGME49_285920	glutathione S-transferase 3	GST3	1.91861	0	0.53667	2.30955	1.68381	2.40207	1.59111	14.8412	15.9808	7.9902
TGME49_289690	glyceraldehyde-3-phosphate dehydrogenase GAPDH1	GAPDH1	13.4799	15.2927	16.2225	16.1718	16.1114	15.919	16.197	12.6327	12.5834	14.8182
TGME49_269190	glyceraldehyde-3-phosphate dehydrogenase GAPDH2	GAPDH2	12.7061	12.0807	11.9299	12.1435	12.1864	11.8273	11.9414	0	1.4872	5.70533
TGME49_244150	glycerate kinase	N/A	7.74695	8.08452	9.5092	9.64476	9.26446	9.41975	9.41757	10.7468	10.7696	7.34073
TGME49_270910	glycerol 3-phosphate acyltransferase ATS1	ATS1	7.49657	6.37855	8.53216	8.04541	7.9795	8.04168	7.69437	1.86684	4.34873	3.48089
TGME49_307570	glycerol-3-phosphate dehydrogenase (gpdh), putative	N/A	11.208	11.1235	11.3544	11.0746	10.9131	10.9578	10.9966	4.34715	4.45446	12.1101
TGME49_256980	glycerol-3-phosphate-acyltransferase	N/A	10.25	10.4306	9.82494	9.62772	9.63056	9.50594	10.2549	10.1133	9.0825	11.0938
TGME49_256090	glycerophosphodiester phosphodiesterase family protein	N/A	9.29458	10.0874	11.0528	10.7206	10.3402	10.6726	10.4624	10.3692	10.3809	11.8734
TGME49_263270	glycerophosphodiester phosphodiesterase family protein	N/A	11.4394	12.8303	9.39332	9.09264	9.01186	9.26126	9.48636	13.1642	13.8495	11.4361
TGME49_202960	glycine cleavage H-protein	N/A	6.60677	5.85165	7.83545	8.29818	7.99281	8.3743	8.03995	8.53648	9.39328	6.2824
TGME49_237470	glycine cleavage T-protein (aminomethyl transferase) domain-containing protein	N/A	9.31395	9.06681	9.01417	8.84687	9.0078	8.748	9.49846	9.71867	8.79729	10.2359
TGME49_283820	glycine cleavage T-protein (aminomethyl transferase) domain-containing protein	N/A	8.43867	8.11869	8.44077	8.52826	8.72588	8.34427	8.13751	1.38207	0.84547	6.35855
TGME49_310670	glycogen phosphorylase GP	GP	10.8882	13.3771	12.2946	12.5711	12.736	12.8164	13.5017	12.0053	11.9917	11.9883
TGME49_222800	glycogen synthase, putative	N/A	10.0366	8.95665	10.1134	10.247	10.3425	10.2241	10.4525	11.4375	10.699	9.58646
TGME49_223110	glycolipid transfer protein GLTP	GLTP	11.7202	13.4353	9.08005	9.25595	9.49342	9.95289	10.8088	14.5162	14.8868	9.81418
TGME49_274110	glycoprotease family protein	N/A	8.95353	9.61962	8.98555	8.74778	8.49744	8.82489	8.56477	5.3456	6.57601	8.41395
TGME49_214790	glycoprotein	N/A	11.1542	10.9998	12.6774	12.6073	12.246	12.1563	11.5545	3.80143	3.6128	8.15111
TGME49_253030	glycosyl hydrolase, family 31 protein	N/A	8.63354	8.91552	9.51894	9.40451	9.53556	9.29622	9.65259	7.69406	7.65105	15.9765
TGME49_270850	glycosyl hydrolases family 17 protein	N/A	2.66679	2.71747	7.95396	7.9843	8.25219	8.42064	8.65292	9.309	9.03213	8.45292
TGME49_320588	glycosyl hydrolases family 35 protein	N/A	9.44338	8.61274	9.70717	9.42683	9.2881	9.47488	8.78946	4.66192	6.36554	9.07115
TGME49_318730	glycosyl transferase	N/A	10.1033	9.42453	9.82289	9.57544	9.60069	9.85334	10.318	11.0361	9.95727	7.65365
TGME49_244520	glycosyl transferase, group 4 family protein	N/A	9.33883	7.73412	8.86722	8.69347	8.41489	8.57104	8.5262	8.91602	9.24373	8.73232
TGME49_319300	glycosylphosphatidylinositol anchor attachment 1 protein, putative	N/A	10.2621	9.68959	9.78253	9.37044	9.28097	9.56866	9.76465	9.50397	9.47746	10.5998
TGME49_209960	glycosyltransferase	N/A	10.1941	7.14234	11.0556	10.9761	11.4422	11.075	11.8554	7.75966	6.94096	9.60529
TGME49_207750	glycosyltransferase family 17 protein	N/A	8.69135	10.4625	9.68261	9.3824	9.37252	9.33109	8.99946	7.67702	7.98956	9.5174
TGME49_268340	glycosyltransferase family 28 C-terminal domain-containing protein	N/A	7.38435	5.40304	4.55361	6.59806	6.95564	6.59729	7.38452	7.06307	6.90421	5.91778
TGME49_266320	glycosyltransferase family protein	N/A	9.86321	8.96269	7.14694	7.44445	8.22588	7.71075	9.23383	7.84211	7.22854	4.09816
TGME49_310400	glycosyltransferase GAT1	GAT1	9.36337	10.1821	7.75411	7.40376	6.86387	7.08188	5.84382	3.75961	2.23154	10.2649
TGME49_227790	glycosyltransferase, group 1 family protein	N/A	8.64639	8.14517	9.17236	8.87926	8.74551	8.9262	8.46999	4.60942	3.95706	6.78112
TGME49_256080	glycosyltransferase, group 2 family protein	N/A	0.696953	1.55914	5.03841	6.97185	7.16764	7.39655	8.3492	6.3652	6.15765	6.4548
TGME49_260650	glycosyltransferase, group 2 family protein	N/A	8.4425	7.19964	7.82033	7.82671	7.86436	7.91351	7.47072	0	0	4.45811
TGME49_315885	glycosyltransferase, putative	N/A	9.63085	8.98307	8.64347	8.27317	7.88862	8.07421	7.25532	0	0.446648	3.62126
TGME49_256990	glycyl-tRNA synthetase	N/A	10.4711	9.44215	11.3781	11.2603	11.1033	11.0362	10.3992	4.22244	4.88907	8.30968
TGME49_240430	glyoxalase family protein	N/A	8.24906	8.23749	8.861	8.84178	8.57946	8.92854	8.79407	9.63871	9.45515	8.99483
TGME49_248400	glyoxalase I, putative	N/A	9.46937	10.3093	10.6166	10.4096	9.98446	10.4233	10.3885	13.7493	14.3247	11.3506
TGME49_500183	glyoxalase, putative	N/A	10.6551	10.5423	8.22863	8.13523	9.09219	8.76823	10.4672	10.8519	9.82839	12.4585
TGME49_213340	GMC oxidoreductase	N/A	1.14104	1.55914	0.783977	1.36567	0.912468	1.27457	0.740659	8.94885	13.7936	9.73097
TGME49_243655	GMC oxidoreductase	N/A	0.696953	1.55914	1.06774	3.48273	4.17508	4.49387	5.40259	8.11554	12.271	8.36145
TGME49_244850	GMC oxidoreductase	N/A	8.71343	9.09531	6.32076	8.32941	9.42705	9.93645	12.4027	12.5048	11.9458	8.80213
TGME49_313950	GMC oxidoreductase	N/A	5.86756	7.62697	7.42628	7.35166	7.8127	8.32075	10.2036	10.3546	10.2963	12.2494
TGME49_203490	GNL3L/Grn1 GTPase	N/A	8.54394	8.25656	9.53732	9.80951	9.65658	9.32043	8.95897	9.55993	8.99157	5.94591
TGME49_253880	GNS1/SUR4 family protein	N/A	11.8422	11.0733	9.69133	9.81885	10.6141	10.6907	12.5128	15.9758	16.8011	9.68332
TGME49_267300	golgi apparatus membrane protein TVP15, putative	N/A	10.302	10.5736	10.1735	9.83635	9.65719	9.89311	10.0484	12.543	12.839	8.51693
TGME49_221700	golgi apparatus membrane protein TVP23, putative	N/A	9.76881	10.3867	9.20038	8.76881	8.68795	9.06836	9.50735	12.7127	12.5708	10.6436
TGME49_258080	golgi localizing protein GLP1	GLP1	9.35447	8.44779	8.68021	8.6738	8.79612	8.52792	9.15187	8.93938	7.9688	8.88591
TGME49_216370	golgi localizing protein GLP2	GLP2	8.14941	8.23972	8.32717	8.17229	8.12634	8.55603	8.88674	11.5165	11.8615	9.15303
TGME49_207370	golgi localizing protein GLP3	GLP3	10.6576	11.2265	10.6106	10.5255	10.6527	10.6738	10.975	10.4878	11.1148	11.3065
TGME49_240220	golgi localizing protein GLP4	GLP4	9.54136	9.21773	9.43526	9.14517	9.23728	9.1139	9.38786	9.43371	8.92711	10.4056
TGME49_219080	Golgi to ER traffic protein GET4, putative	N/A	9.50167	9.55486	10.092	9.80042	9.58347	9.85181	10.0348	12.2766	12.343	9.8989
TGME49_261980	gorasp2-prov protein	N/A	9.88881	9.31619	9.51316	9.52611	9.68605	9.50129	10.1796	9.86775	8.64613	6.94151
TGME49_295460	Got1 family protein	N/A	8.38017	10.2386	9.401	8.94042	8.74941	9.13881	9.37528	13.9777	14.5492	10.9524
TGME49_233080	G-patch domain-containing protein	N/A	8.8523	8.65906	9.46036	9.38166	9.54062	9.34727	8.93785	8.20061	7.24885	8.87993
TGME49_278040	G-patch domain-containing protein	N/A	8.16997	7.87479	8.74684	9.03497	8.80958	8.93548	9.12477	13.4304	13.1286	8.97633
TGME49_224920	GPI ethanolamine phosphate transferase 3, putative	N/A	9.52532	8.13491	8.23748	8.51948	8.55947	8.4965	8.46999	1.99783	4.67547	8.12724
TGME49_500109	GPI transamidase component PIG-S, putative	N/A	9.60491	8.23548	8.68331	8.38066	8.40105	8.27998	8.34193	4.70627	5.41041	6.00032
TGME49_275568	GPI transamidase subunit PIG-U protein	N/A	9.51827	8.37142	7.85598	8.27264	8.1907	8.43454	8.50119	8.69073	9.13133	7.80928
TGME49_308000	Gpi16 subunit, GPI transamidase component protein	N/A	10.1423	8.0769	9.07636	8.97334	9.01584	8.86899	9.02156	9.50205	9.83598	9.02643
TGME49_252440	GPI-anchor transamidase, putative	N/A	9.66163	9.15047	9.37723	8.94412	8.84022	8.84836	9.3156	10.2791	9.41044	10.6847
TGME49_243930	GPI-anchored micronemal antigen GAMA	GAMA	11.6731	12.1247	11.4476	11.8002	12.1261	11.6399	10.6564	5.8027	7.68448	14.1102
TGME49_214920	GPI-anchored wall transfer protein GWT1, putative	N/A	7.44188	7.52947	8.13861	8.16955	8.11291	8.00212	7.52545	9.02828	7.75698	7.23608
TGME49_233760	GPR180 domain-containing protein	N/A	9.51942	9.26971	8.45575	8.61663	8.84424	8.81847	9.50069	6.72435	7.68378	10.8961
TGME49_294210	G-protein gamma-like domain-containing protein	N/A	0.524436	0	5.63369	7.10686	8.49351	8.56435	10.1204	7.74663	8.42508	6.23047
TGME49_311920	GRAM domain-containing protein	N/A	10.6324	10.0346	9.38734	9.394	9.82437	9.68022	10.1296	11.9285	11.2029	10.2887
TGME49_288240	GRIP domain-containing protein	N/A	7.53941	6.82202	8.23548	7.5857	7.95448	7.98991	8.18596	9.85025	9.49009	9.82934
TGME49_224600	GTP binding protein	N/A	8.53974	8.27373	9.61092	9.28831	9.10037	9.21	8.68541	6.90955	7.01611	9.8925
TGME49_219510	GTP binding protein 7 isoform 2 family protein, putative	N/A	9.0941	8.6701	8.96343	8.86138	8.92978	8.6247	8.08223	1.41823	0.540102	4.32886
TGME49_253780	GTP cyclohydrolase I, putative	N/A	9.79241	10.0658	10.6972	10.6358	10.3186	10.5376	10.9965	14.5	15.5426	8.56826
TGME49_286640	GTPase	N/A	7.89498	9.20966	9.39879	8.99512	8.66312	8.77446	7.64095	8.31943	8.98923	6.92421
TGME49_273070	GTPase activating protein for adp ribosylation factor, putative	N/A	11.0424	10.6389	10.4656	10.5142	10.4581	10.5537	11.0672	13.9224	14.7029	13.2035
TGME49_309220	GTPase activating protein for Arf protein	N/A	10.6741	9.18007	9.48395	9.77046	9.7635	9.61683	10.2597	13.6452	13.4884	11.6165
TGME49_248340	GTP-binding nuclear protein ran/tc4	N/A	12.0607	12.7268	13.6274	13.3798	12.7013	13.1691	12.3006	10.4776	10.1445	5.9537
TGME49_217760	GTP-binding protein	N/A	8.68697	8.45263	8.24519	8.11506	8.09244	7.67162	7.13193	4.83523	4.31728	6.67225
TGME49_244310	GTP-binding protein	N/A	9.70835	9.81793	10.5339	10.7874	10.3111	10.3343	9.55044	3.3457	2.28921	9.66791
TGME49_260360	GTP-binding protein	N/A	7.58983	8.22961	7.95941	7.87786	7.85871	7.62372	7.31057	7.28252	6.77094	6.94867
TGME49_211480	GTP-binding protein engA, putative	N/A	8.34113	8.69692	7.73019	7.90148	7.83434	7.8509	7.19201	12.4523	13.6838	9.22302
TGME49_262510	GTP-binding protein engB, putative	N/A	8.07321	7.71801	7.67815	7.85625	7.86423	7.94405	7.24827	7.64694	6.56392	7.26251
TGME49_307980	GTP-binding protein lepA, putative	N/A	8.56637	8.7687	8.90207	8.57388	8.43553	8.50493	7.55492	4.40549	3.98377	8.86787
TGME49_204350	GTP-binding protein, putative	N/A	9.01547	8.38404	8.82879	8.37466	8.33996	8.28025	7.85304	8.64485	10.2953	7.99228
TGME49_208490	GTP-binding protein, putative	N/A	8.82175	8.99636	9.54798	9.24404	9.41484	9.35529	9.11045	9.38393	8.35644	9.46327
TGME49_214350	GTP-binding protein, putative	N/A	10.5377	10.6731	12.1959	12.0866	11.4907	11.7294	11.0977	6.50966	5.90073	6.15148
TGME49_233260	GTP-binding protein, putative	N/A	9.65074	8.88999	10.4464	10.4241	10.0046	10.1668	9.94404	9.59949	10.3269	10.1712
TGME49_239340	GTP-binding protein, putative	N/A	9.24594	8.73245	8.47244	8.25019	8.12567	8.32862	7.75289	0.885526	0	2.0767
TGME49_255470	GTP-binding protein, putative	N/A	8.21314	8.22732	7.92722	7.86609	8.07988	8.21827	8.44274	8.02084	8.80679	8.51428
TGME49_259920	GTP-binding protein, putative	N/A	7.92322	3.89062	8.36309	8.58674	8.37414	8.4595	8.1356	5.91541	5.33423	8.40733
TGME49_314320	GTP-binding protein, putative	N/A	8.02862	8.77481	8.30696	7.76429	7.48772	7.7876	7.86	7.56177	6.97887	7.11514
TGME49_232190	guanine nucleotide exchange factor GBF1	N/A	9.77476	7.09944	9.61158	9.52214	9.99762	9.8738	10.2595	5.8373	3.75792	4.34348
TGME49_278730	guanine nucleotide-binding protein, putative	N/A	8.20314	8.60938	8.32279	8.31787	7.92564	8.09769	7.43636	8.34586	7.74079	10.3287
TGME49_500146	guanine-nucleotide exchange factor, putative	N/A	9.35815	8.14797	8.84931	8.46762	8.92746	8.79255	9.53574	9.59711	9.09496	7.64861
TGME49_238390	guanylate cyclase organizer UGO	UGO	10.6447	10.5445	10.3051	10.2751	10.5377	10.2507	10.1376	11.7735	12.1183	9.96566
TGME49_242730	guanylate kinase family protein	N/A	8.76534	9.84091	9.98892	9.66394	9.60232	9.63702	9.1338	5.6342	6.03346	10.1378
TGME49_304990	guanylate-binding protein, N-terminal domain-containing protein	N/A	10.9591	10.549	11.1467	10.7949	10.7371	10.8246	10.9405	11.9106	11.8075	10.5382
TGME49_254370	guanylyl cyclase	GC	11.2836	10.6167	10.6294	10.7508	10.93	10.4343	10.035	3.08411	6.35762	11.3419
TGME49_286130	guanylylate cyclase, putative	N/A	8.19146	9.69851	7.30028	6.5428	6.98955	6.87351	6.84624	7.35712	7.9296	11.7027
TGME49_204160	GYF domain-containing protein	N/A	9.93127	6.41331	9.12565	9.7747	10.0836	9.55208	10.8228	9.99976	9.0425	7.12638
TGME49_224610	GYF domain-containing protein	N/A	9.31366	8.24399	8.3673	8.47876	8.7667	8.89178	10.5842	14.5843	14.7066	9.72051
TGME49_298610	GYF domain-containing protein	N/A	11.0121	10.1611	10.867	10.9155	11.1669	10.9124	10.851	7.31026	6.75511	9.90136
TGME49_289510	H/ACA ribonucleoprotein complex subunit 1, putative	GAR1	8.16368	7.45414	8.29639	8.47708	8.54603	8.13255	7.54746	6.08849	3.48309	9.03165
TGME49_209870	HAD hydrolase, family IIA protein	N/A	8.29973	9.00025	8.45289	8.83571	8.87542	8.64759	8.8856	6.69267	6.22642	10.0653
TGME49_289980	HAD hydrolase, family IIA protein	N/A	9.60323	8.6617	9.8527	10.2167	10.1418	9.96084	9.67697	8.99916	10.5045	8.80658
TGME49_222010	HAD hydrolase, family IIID protein	N/A	8.70898	8.9386	8.86373	8.91728	8.8015	9.12363	9.54369	8.25443	7.41399	9.49342
TGME49_293720	HAD-like superfamily	N/A	10.0892	11.6972	9.59191	10.4999	10.6721	10.3447	8.82878	5.60867	6.44626	7.90375
TGME49_236860	haloacid dehalogenase family hydrolase domain-containing protein	N/A	9.06368	10.1769	8.79286	9.35179	9.36352	9.15912	8.49971	8.48241	9.22796	7.25323
TGME49_289910	haloacid dehalogenase-like hydrolase HAD2a	HAD2A	11.1994	8.61692	8.32148	9.306	9.49395	8.79169	8.19553	3.85666	5.35388	7.50472
TGME49_223870	haloacid dehalogenase-like hydrolase, putative	HAD2D	6.45745	5.86364	7.5639	7.83746	7.98452	7.99938	7.31733	4.73912	4.7192	4.78981
TGME49_246110	haloacid dehalogenase-like hydrolase, putative	HAD2B	0	4.26961	4.56761	6.08748	7.22184	7.5186	9.3134	2.17185	4.94576	0.139076
TGME49_271960	haloacid dehalogenase-like hydrolase, putative	HAD2C	11.1609	9.8862	10.6932	10.6046	10.445	10.7357	11.6243	15.8018	16.3517	12.2657
TGME49_217440	HCNGP family protein	N/A	9.64509	8.79548	9.71286	9.61685	9.54127	9.47092	9.58964	12.2784	12.3425	11.4244
TGME49_207970	HEAT repeat-containing protein	N/A	4.21796	7.44946	8.1688	8.75933	9.2424	9.4396	10.6421	8.4659	8.93993	4.85208
TGME49_215040	HEAT repeat-containing protein	N/A	10.0067	9.12081	8.68644	9.25929	9.52753	9.18355	9.95568	10.0266	8.89346	6.66821
TGME49_216590	HEAT repeat-containing protein	N/A	10.6995	9.75002	10.9786	10.9083	10.9522	10.777	10.8422	12.4419	13.1014	9.71392
TGME49_220910	HEAT repeat-containing protein	N/A	10.1887	9.69696	9.38041	9.0313	9.19023	9.06278	9.57702	9.91805	8.74586	10.215
TGME49_229180	HEAT repeat-containing protein	N/A	10.2607	9.2143	11.0412	11.0603	11.1944	10.9099	10.7804	8.85217	8.44744	7.48913
TGME49_229350	HEAT repeat-containing protein	N/A	9.45197	7.99203	9.09992	9.06007	9.05671	9.0864	9.5825	11.2623	11.5132	6.23525
TGME49_231600	HEAT repeat-containing protein	N/A	9.64225	7.98519	10.9696	10.954	10.9197	10.7155	11.2174	11.8479	11.0881	8.23076
TGME49_255390	HEAT repeat-containing protein	N/A	8.45747	7.7025	8.23837	8.14879	7.98688	8.15557	7.63393	10.6906	12.7052	7.54384
TGME49_260270	HEAT repeat-containing protein	N/A	9.71879	8.46935	9.55994	9.15147	9.36268	9.23869	9.19802	8.67682	8.63676	7.16496
TGME49_264752	HEAT repeat-containing protein	N/A	7.9895	7.07374	9.2951	8.94055	8.85592	9.06148	8.1726	0.425737	2.24769	7.59023
TGME49_280420	HEAT repeat-containing protein	N/A	4.83097	3.81077	7.93426	8.81687	9.00412	9.54062	10.2913	6.90806	8.2008	8.66451
TGME49_280540	HEAT repeat-containing protein	N/A	9.03719	7.90387	8.06475	8.47315	8.9203	8.8464	9.42666	10.4811	9.72123	6.17013
TGME49_290340	HEAT repeat-containing protein	N/A	9.25394	8.95877	9.95399	10.181	9.96591	9.71171	9.12958	4.29127	5.07585	9.88791
TGME49_290990	HEAT repeat-containing protein	N/A	9.06886	8.58925	9.03727	8.93471	8.95621	8.84487	9.06518	8.2989	7.61133	8.86549
TGME49_295040	HEAT repeat-containing protein	N/A	10.7649	9.59519	11.4658	11.4386	11.5575	11.1644	11.4647	8.22734	7.0497	9.47694
TGME49_305040	HEAT repeat-containing protein	N/A	9.98784	9.19154	10.5092	10.3383	10.2099	10.0585	9.72326	2.96767	3.33876	8.68364
TGME49_310600	heat shock factor binding protein 1 protein	N/A	8.63016	8.24081	8.8323	8.54661	8.3337	8.58867	8.386	8.27707	7.86792	8.89514
TGME49_251780	heat shock protein	N/A	12.1347	12.027	12.9809	13.3325	13.1965	12.9594	12.5832	6.50048	6.63243	11.0562
TGME49_324600	heat shock protein	N/A	10.5779	11.5311	9.15154	10.1908	10.3079	10.1183	8.70565	3.75546	6.935	13.1039
TGME49_265310	heat shock protein 40, putative	N/A	11.0835	11.2464	11.2405	11.2751	10.9304	10.9717	11.22	14.1434	13.9352	12.2732
TGME49_292920	heat shock protein 75, putative	N/A	11.4503	11.7837	11.5968	11.6525	11.1814	11.405	10.2532	8.17148	8.10719	11.2714
TGME49_244560	heat shock protein 90, putative	N/A	13.9552	12.9792	14.2368	14.1179	14.1178	14.1413	14.232	6.27762	6.72793	12.3841
TGME49_272230	heat shock protein hslv, putative	N/A	8.86935	9.0557	9.78811	9.71067	9.5852	9.86734	10.0796	11.3937	11.0729	10.1095
TGME49_232940	heat shock protein HSP20	HSP20	11.4301	12.6371	9.87271	10.9062	10.8096	10.8078	9.24999	6.29242	8.38334	14.1516
TGME49_312600	heat shock protein HSP21	HSP21	11.609	15.4269	6.10574	6.25778	6.8144	7.64973	8.58788	11.8328	11.608	14.3373
TGME49_286720	heat shock protein HSP28	HSP28	10.6439	10.911	12.213	12.6988	13.1222	13.1317	14.7591	8.78619	8.71402	11.6062
TGME49_289600	heat shock protein HSP29	HSP29	10.7956	12.6504	7.37814	8.27784	8.39756	8.20868	6.73755	4.77107	6.45119	14.1846
TGME49_247550	heat shock protein HSP60	HSP60	11.9829	11.3404	12.824	12.9856	12.9236	12.7417	12.5011	0	0	8.51484
TGME49_273760	heat shock protein HSP70	HSP70	15.0077	15.5202	16.0637	15.8844	15.6283	15.8204	15.4874	7.43449	8.01662	14.6669
TGME49_288380	heat shock protein HSP90	HSP90	13.8446	14.4824	16.3049	16.1204	16.1538	16.3578	16.1615	9.53857	9.17384	13.4467
TGME49_201150	heavy metal translocating P-type ATPase subfamily protein	N/A	9.70889	9.41061	8.28765	8.65123	8.68253	8.5529	8.30296	2.32663	3.49249	5.58993
TGME49_500435	HECT-domain (ubiquitin-transferase) -containing protein	N/A	10.0785	10.0708	9.12715	8.99487	9.63375	9.54999	10.1456	9.65629	9.22075	10.2638
TGME49_209000	HECT-domain (ubiquitin-transferase) domain-containing protein	N/A	9.19829	8.9667	7.25809	7.8009	8.26464	7.98033	9.62221	13.7145	13.9139	10.3419
TGME49_222430	HECT-domain (ubiquitin-transferase) domain-containing protein	N/A	9.22605	9.56028	8.21866	8.42839	8.78071	8.44623	8.28755	0	3.31869	11.7544
TGME49_275630	HECT-domain (ubiquitin-transferase) domain-containing protein	N/A	10.1462	9.92758	9.80287	9.92302	10.0585	9.86795	10.1926	9.4819	8.96038	10.4915
TGME49_278940	HECT-domain (ubiquitin-transferase) domain-containing protein	N/A	9.99347	10.9134	7.90728	7.66919	7.66743	7.80065	6.95773	7.51392	8.20067	12.5943
TGME49_291980	HECT-domain (ubiquitin-transferase) domain-containing protein	N/A	10.8523	10.6961	9.24618	9.45665	9.8904	9.82533	10.5115	9.88398	8.95096	10.1773
TGME49_295710	HECT-domain (ubiquitin-transferase) domain-containing protein	N/A	10.0972	9.81252	10.4083	10.5962	11.0013	10.818	10.9526	11.0559	10.2728	10.7188
TGME49_216950	helicase	N/A	8.52887	9.23463	8.2921	8.54243	8.48693	8.4304	7.36051	8.79573	9.83111	6.93674
TGME49_260200	helicase associated domain (ha2) protein	N/A	9.58946	10.5891	9.10541	9.03278	9.08548	8.89579	9.41127	10.8928	10.8294	10.5508
TGME49_295070	helicase associated domain (ha2) protein	N/A	8.80483	7.8417	9.71542	9.48057	9.49232	9.41234	9.07857	2.91095	3.46366	7.41667
TGME49_318440	helicase associated domain (ha2) protein	N/A	11.3492	9.27954	10.5054	10.6616	10.9655	10.3963	10.5052	11.4449	10.9727	10.9123
TGME49_209770	helicase, putative	N/A	7.8417	3.38124	7.39578	7.77598	7.76013	7.76541	7.52194	7.46778	6.32392	4.48511
TGME49_215030	helicase, putative	N/A	9.09167	8.03979	9.04433	8.81119	9.07815	8.75421	9.22163	9.51761	8.63916	7.98952
TGME49_215990	helicase, putative	N/A	8.79483	6.1425	8.20356	7.91476	7.88715	7.6953	7.40814	5.07028	6.09639	6.38052
TGME49_231800	helicase, putative	N/A	8.16084	7.09141	8.1234	7.8345	8.14135	8.2272	8.80638	8.87226	8.11539	3.94602
TGME49_319590	helicase, putative	N/A	8.82678	7.97383	8.29477	8.08097	8.07158	8.15915	8.75453	8.97303	7.9566	3.70963
TGME49_285490	helix-hairpin-helix motif domain-containing protein	N/A	9.23948	7.04038	7.55537	7.88844	7.78253	7.58505	7.47617	4.22827	5.20471	7.49419
TGME49_313470	helix-hairpin-helix motif domain-containing protein	N/A	7.78954	8.85784	8.11614	8.13427	7.96926	8.03621	7.9154	8.19268	6.95506	9.57694
TGME49_210778	hemimethylated DNA binding domain-containing protein	N/A	10.1837	9.73387	10.2494	10.2383	10.0507	10.1453	10.1304	10.0128	9.44867	10.3384
TGME49_241160	hemolysin-III related subfamily protein	N/A	9.734	8.96561	9.49878	9.19545	9.12847	9.58051	9.84683	11.9297	11.7155	10.3744
TGME49_269430	heptaprenyl diphosphate synthase COQ1	COQ1	8.0091	5.74723	9.20207	9.37646	9.34389	9.17791	8.58172	2.22957	1.94453	5.51129
TGME49_213752	herpesviridae ul52/ul70 dna primase	N/A	8.90265	8.19445	8.44924	7.97407	7.90955	7.93577	8.39784	10.0421	8.51182	4.55581
TGME49_297925	HesB-like domain-containing protein	N/A	7.36039	7.51206	8.40146	8.21974	8.34926	8.34	8.85271	9.97827	9.2441	9.02358
TGME49_265450	hexokinase	N/A	11.7133	11.8299	13.7806	13.5652	13.3028	13.4946	13.2753	9.85946	9.90184	10.577
TGME49_235490	HID1 domain-containing protein	N/A	10.3065	9.63482	10.2972	10.1859	10.0157	10.1873	10.1121	6.04808	5.53116	9.52346
TGME49_247020	high mobility group protein b1, putative	N/A	9.57675	10.2678	10.1608	9.98241	9.6001	9.80257	9.60602	13.1479	13.4451	9.83194
TGME49_263720	high mobility group protein B1, putative	HMGB1C	10.6089	10.5184	12.0746	11.8786	11.871	11.6179	11.8959	13.5783	13.807	8.04874
TGME49_204080	histidine acid phosphatase superfamily protein	N/A	10.5114	10.4324	8.81339	8.78315	9.11141	9.07207	9.56614	9.762	9.80895	10.5754
TGME49_232270	histidine acid phosphatase superfamily protein	N/A	7.7622	11.1014	10.3273	10.5091	10.37	10.4892	10.126	2.80235	2.53691	13.0208
TGME49_304650	histidine acid phosphatase superfamily protein	N/A	8.86732	8.03979	8.33571	8.65437	8.79159	8.54106	8.90278	8.70463	7.39967	8.70341
TGME49_308950	histidine acid phosphatase superfamily protein	N/A	11.2912	13.2564	14.1699	14.3366	14.2239	14.2235	12.7731	10.1524	11.0226	9.4649
TGME49_500370	histidine phosphatase, putative	N/A	3.60477	6.8111	1.96483	4.77855	6.78867	7.25621	8.43125	0.691662	0.540102	6.82175
TGME49_225420	histidine triad domain-containing protein	N/A	8.35435	9.05329	7.15826	7.88715	7.50469	7.71325	7.42576	9.2789	9.73137	8.83571
TGME49_218810	histidyl-tRNA synthetase	N/A	9.1984	9.63687	9.32497	9.13553	8.68378	9.13617	8.38471	5.33801	5.62585	4.97343
TGME49_280600	histidyl-tRNA synthetase (HisRS), putative	N/A	10.7705	8.95541	10.9609	10.813	10.8253	10.5916	10.5959	12.8186	14.1952	10.5099
TGME49_232610	histone acetyltransferase subunit nua4 protein	N/A	8.56433	9.24852	9.54447	9.17055	8.94422	8.99908	8.44088	7.52306	6.54603	9.1096
TGME49_276180	histone acetyltransferase TAF1/250	N/A	9.85503	9.07389	9.48471	9.4063	9.63056	9.30752	9.3272	7.34437	6.45029	9.44906
TGME49_219520	histone arginine methyltransferase PRMT1	PRMT1	11.0075	9.80633	11.8222	11.8962	11.5893	11.5479	11.0417	6.90108	7.0749	9.76913
TGME49_500160	histone arginine methyltransferase PRMT2	PRMT2	8.14569	7.96305	9.00423	8.94279	9.07643	9.15619	9.50572	11.0349	10.7158	5.44639
TGME49_252420	histone arginine methyltransferase PRMT3	PMRT3	7.93077	6.23059	8.26601	8.8902	8.83617	8.37574	8.24067	8.92038	9.20523	7.50146
TGME49_294270	histone arginine methyltransferase PRMT4/CARM1	PRMT4	8.34581	9.09774	10.4528	10.1408	9.80708	9.89168	9.34814	5.49736	5.53788	10.4409
TGME49_215560	histone arginine methyltransferase PRMT5	PRMT5	8.61272	6.57798	8.84971	8.78345	8.99113	8.44245	8.69453	9.80046	8.82163	3.01646
TGME49_205750	histone deacetylase complex subunit Sin3	SIN3	10.1834	11.7375	9.94974	9.7505	9.3733	9.6545	8.95983	8.7801	9.10144	10.1664
TGME49_281420	histone deacetylase HDAC1	HDAC1	8.31528	8.09555	8.05343	8.19667	8.7521	8.6683	10.4636	11.1259	10.5746	6.5678
TGME49_249620	histone deacetylase HDAC2	HDAC2	9.40843	9.12081	8.53191	8.15046	7.93065	7.89945	7.39478	1.16409	2.67235	8.28311
TGME49_227290	histone deacetylase HDAC3	HDAC3	11.2873	11.8449	11.5743	11.2131	11.0106	11.3314	10.8191	9.33454	8.85614	12.0806
TGME49_202230	histone deacetylase HDAC5	HDAC5	8.76321	8.6517	8.69427	9.28449	9.25911	8.90775	8.35578	6.36117	5.52268	10.6846
TGME49_227020	histone deacetylase SIR2	SIR2	10.0976	11.7537	9.89345	9.81632	9.41243	9.85026	9.94666	12.2452	13.4871	12.6239
TGME49_267360	histone deacetylase SIR2-like	N/A	7.117	3.47673	7.16533	7.63701	7.79047	7.8548	7.90557	6.05229	5.07674	4.92861
TGME49_227970	histone family DNA-binding protein	N/A	11.5931	11.4907	10.4242	10.3007	9.76352	9.8598	9.41883	5.80222	8.1199	7.14981
TGME49_315570	histone H1-like protein	N/A	5.08668	2.49398	3.53252	6.3063	5.35925	5.39774	5.11049	8.43173	8.94601	6.91501
TGME49_261250	histone H2A1	N/A	6.68086	8.14528	9.56877	10.0818	9.52122	9.65013	10.2839	13.4703	13.8811	10.1116
TGME49_261580	histone H2AX	N/A	6.79893	2.49398	5.98091	5.7067	5.64007	5.18699	5.78066	3.25293	3.19835	2.63703
[truncated: 5,990 more rows]

## Sheet: 1.2
ToxoDB ID Release 68	Product Description	Gene Name	Tachyzoites	Bradyzoites	EES1	EES2	EES3	EES4	EES5	Unsporulated oocysts	Sporulating oocysts	Sporulated oocysts
TGME49_310580	1,3(4)-beta-glucanase	N/A	0.785181	2.53912	996.561	902.537	1172.78	1192.77	1370.13	100.33	223.158	16.0664
TGME49_278110	1,3-beta-glucan synthase component protein	N/A	894.681	657.331	977.748	902.165	1407.02	1303.77	2352.68	1117.31	1620.66	908.536
TGME49_316520	1,4-alpha-glucan-branching enzyme	SBE1	892.896	1665.1	3292.22	3339.41	3864.93	4110.12	5351.48	9.21656	12.5708	171.564
TGME49_263090	14-3-3 protein	N/A	19788.5	20206.5	33065.6	30409.7	25179.7	29243.7	33455.9	4331.64	5413.74	9104.74
TGME49_269582	14-3-3 protein	N/A	0.663618	1.2004	128.059	381.337	632.729	753.297	1712.53	2134.24	2869.37	430.1
TGME49_227952	14-3-3 superfamily protein	N/A	1160.55	1239.27	84.6201	254.736	232.153	192.098	127.18	976.32	1590.53	1149.14
TGME49_321310	16S rRNA processing protein RimM domain-containing protein	N/A	329.584	842.057	225.606	185.194	143.47	166.523	88.3403	7.93523	9.69757	793.51
TGME49_232390	18S rRNA biogenesis protein RCL1 protein	N/A	319.834	161.47	425.625	416.321	443.598	329.541	234.083	243.65	312.409	177.493
TGME49_214850	1-deoxy-D-xylulose 5-phosphate reductoisomerase, putative	N/A	297.286	232.469	561.114	486.911	447.735	457.785	344.639	1.24843	0	764.766
TGME49_208820	1-deoxy-D-xylulose-5-phosphate synthase	N/A	567.731	221.95	905.858	749.111	695.059	649.918	396.003	1454.6	2079.14	392.602
TGME49_295140	1-phosphatidylinositol 4-kinase	N/A	1.74609	3.49543	0	1.06737	2.21275	1.41407	2.38556	0.974014	0	5.8886
TGME49_226300	2,4-dienoyl CoA reductase 2, peroxisomal family protein	N/A	1.20539	2.53912	130.966	405.646	605.464	1057.77	4327.03	138417	214441	4710.04
TGME49_232750	23S rRNA (adenine(1618)-N(6))-methyltransferase, putative	N/A	1248.58	3068.58	1164.67	1056.94	711.672	898.888	410.838	728.898	791.251	714.658
TGME49_267080	26S protease regulatory subunit 4, putative	N/A	2493.71	2649.82	3477.34	3109.71	2822.15	2960.62	3891.37	6196.41	4320.25	5824.76
TGME49_228210	26S proteasome regulatory subunit	N/A	1499.34	1281.99	1756.66	1743.81	1485.51	1645.35	2192.26	13098.7	13129.5	1487.16
TGME49_229950	26S proteasome regulatory subunit 6b, putative	N/A	1790.48	1116.58	2216.67	2363.45	2112.67	2234.28	2602.35	1440.31	1398.21	1640.31
TGME49_277500	26S proteasome regulatory subunit 7, putative	N/A	2262.62	1310.72	1874.71	1779.56	1748.27	1690.87	2499.99	1971.19	1512.93	1220.7
TGME49_250830	26S proteasome regulatory subunit RPN12, putative	N/A	1535.25	919.177	1611.84	1587.78	1471.35	1578.12	1960.63	1559.04	1694.72	295.289
TGME49_224110	26S proteasome regulatory subunit RPN13, putative	N/A	1249.98	1080.85	1046.4	1125.52	1038.83	969.373	1401.96	4134.86	3445.11	2019.38
TGME49_238180	26S proteasome regulatory subunit RPN7, putative	N/A	1793.35	1169.35	1996.69	1795.51	1695.73	1792.26	2283.43	6278.93	7140.58	1347.14
TGME49_300310	26S proteasome regulatory subunit, S6a family AAA ATpase	N/A	2489.9	2090.73	2973.43	2699.57	2495.04	2684.46	3346.05	3872.91	2506.65	2654.93
TGME49_261210	26s proteasome subunit p55, putative	N/A	1658.77	1520.61	2755.85	2353.54	1942.26	2553.35	2460.48	1150.99	1891.78	1333.6
TGME49_247850	28 kDa A-kinase anchor, putative	N/A	50.4511	183.755	36.6435	95.767	169.609	198.256	491.724	1134.65	1697.82	269.405
TGME49_255690	2-C-methyl-D-erythritol 2,4-cyclodiphosphate synthase domain-containing protein	N/A	336.507	175.924	704.211	478.136	472.389	466.891	357.76	1.60643	0.454075	56.4254
TGME49_306260	2-C-methyl-D-erythritol 4-phosphate cytidylyltransferase, putative	ISPD	643.731	591.296	574.9	514.817	408.639	456.326	409.571	2079.57	2967.9	541.045
TGME49_319920	2-oxo acid dehydrogenases acyltransferase (catalytic domain) domain-containing protein	N/A	1187.99	243.774	3466.35	3657.08	3517.84	3256.98	5312.64	627.461	312.866	1201.64
TGME49_244200	2-oxoglutarate dehydrogenase e1 component, mitochondrial precursor, putative	N/A	1936.28	1489.07	2994.36	2605.46	2473.56	2277.89	2024	73.6015	97.1123	365.402
TGME49_274060	2-oxoglutarate/malate translocase OMT	OMT	2437.7	5972.41	2864.67	3009.85	2304.52	2760.63	3033.76	10937.2	18026.3	1330.64
TGME49_239490	2-oxoisovalerate dehydrogenase subunit alpha	BCKDH-E1a	2703.14	1541.59	7059.14	6910.29	7269.16	7567.64	14115.4	1880.27	1382.96	2308.95
TGME49_292100	2-oxoisovalerate dehydrogenase subunit alpha, putative	N/A	191.205	364.895	86.1204	97.1127	225.345	323.695	1678.76	33973.9	65092.8	1155.65
TGME49_319650	3' exoribonuclease family, domain 1 domain-containing protein	N/A	357.65	317.496	390.676	338.128	326.077	340.311	218.353	50.138	113.611	363.948
TGME49_202750	3' exoribonuclease family, domain 1 domain-containing protein	N/A	333.496	160.877	488.922	559.201	554.395	568.189	516.176	192.175	177.771	2321.58
TGME49_231040	3' exoribonuclease family, domain 1 domain-containing protein	N/A	277.374	248.774	594.444	664.755	566.447	627.578	713.432	9975.69	19404.8	995.432
TGME49_306610	3' exoribonuclease family, domain 1 domain-containing protein	N/A	217.072	370.867	264.312	368.995	307.933	349.209	223.646	31.3509	51.0622	100.691
TGME49_223672	3'(2'),5'-bisphosphate nucleotidase	N/A	356.884	946.063	1393.65	1294.84	1225.63	1517.39	1407.18	930.028	1652.97	300.204
TGME49_500228	30S ribosomal protein S10, putative	N/A	526.956	385.102	618.94	426.136	404.583	414.308	288.578	9.18355	14.6478	3.75943
TGME49_219770	30S ribosomal protein S12, putative	N/A	333.947	354.106	488.365	438.051	415.105	431.098	334.649	16.3025	4.73873	906.098
TGME49_216040	30S ribosomal protein S15, putative	N/A	463.341	226.804	476.761	576.48	593.819	483.969	386.163	165.086	111.437	818.061
TGME49_318420	30S ribosomal protein S16, putative	N/A	350	182.483	521.124	550.816	409.615	499.349	320.485	105.983	63.8153	631.969
TGME49_285970	30S ribosomal protein S5, putative	N/A	448.143	429.951	747.331	718.503	708.137	654.863	600.49	1137.02	988.454	486.57
TGME49_246970	3'-5' exonuclease domain-containing protein	N/A	372.601	346.753	633.631	604.4	618.175	594.747	339.048	315.967	551.11	197.887
TGME49_273100	3'-5' exonuclease domain-containing protein	N/A	160.693	100.234	205.003	150.457	141.095	133.407	106.903	52.0956	28.9146	192.445
TGME49_250890	3'-5' exonuclease domain-containing protein	N/A	112.292	152.165	243.726	224.67	198.722	187.25	116.892	21.4966	8.96729	114.49
TGME49_275830	3'-5' exonuclease, putative	N/A	194.765	103.022	222.746	201.462	233.819	208.277	244.669	141.783	65.6456	133.685
TGME49_203610	3'-5' exoribonuclease csl4, putative	N/A	475.479	987.847	534.102	663.024	563.419	613.8	312.732	7.86205	29.3607	1654.87
TGME49_202540	3'5'-cyclic nucleotide phosphodiesterase PDE1	PDE1	2271.69	1678.05	1020.95	800.82	816.797	774.489	1399.28	6506.95	4780.22	1169.35
TGME49_272650	3'5'-cyclic nucleotide phosphodiesterase PDE10	PDE10	991.818	537.234	228.594	252.687	238.474	192.78	132.473	18.0705	168.072	219.49
TGME49_224840	3'5'-cyclic nucleotide phosphodiesterase PDE11	PDE11	1016.73	931.336	1031.16	809.2	784.986	681.801	349.336	51.347	240.017	865.407
TGME49_310520	3'5'-cyclic nucleotide phosphodiesterase PDE12	PDE12	225.958	1143.57	636.397	877.953	879.05	730.026	481.212	0	0	30.8524
TGME49_257080	3'5'-cyclic nucleotide phosphodiesterase PDE13	PDE13	1360.63	1029.12	787.511	1025.89	1170.18	931.58	504.844	4.44777	15.8898	1133.52
TGME49_233040	3'5'-cyclic nucleotide phosphodiesterase PDE15	PDE15	13.4453	140.174	148.03	306.655	478.067	574.946	1203.29	1667.08	1817.37	1209.77
TGME49_500044	3'5'-cyclic nucleotide phosphodiesterase PDE16	PDE16	17.0911	562.876	697.22	1296.74	1402.93	1866.28	3189.35	1197.89	1477.78	1186.5
TGME49_257945	3'5'-cyclic nucleotide phosphodiesterase PDE17	PDE17	798.722	1817.95	504.631	824.637	1968.32	2354.38	12486	57040.7	34217.8	5202.82
TGME49_226755	3'5'-cyclic nucleotide phosphodiesterase PDE18	PDE18	269.503	37.1257	718.438	758.263	1094.63	1316.79	1747.57	15.9108	24.2795	36.7241
TGME49_293000	3'5'-cyclic nucleotide phosphodiesterase PDE2	PDE2	1090.87	729.651	656.725	1047.08	1740.1	1143.96	3903.82	201.822	93.3218	3061.43
TGME49_500342	3'5'-cyclic nucleotide phosphodiesterase PDE3	PDE3	4.35071	4.28133	15.1187	176.047	352.27	384.821	846.352	5.7035	19.4631	120.632
TGME49_229405	3'5'-cyclic nucleotide phosphodiesterase PDE4	PDE4	20.7433	323.536	290.535	446.621	578.982	741.669	1379.97	605.624	823.386	159.938
TGME49_220420	3'5'-cyclic nucleotide phosphodiesterase PDE5	PDE5	67.7912	304.308	5.98378	41.7623	31.5738	64.361	44.5056	517.422	2267.76	409.491
TGME49_266920	3'5'-cyclic nucleotide phosphodiesterase PDE6	PDE6	8381.84	16062.9	12.2026	31.0876	36.0425	75.3829	106.456	1658.34	3113.23	6790.69
TGME49_280410	3'5'-cyclic nucleotide phosphodiesterase PDE7	PDE7	1001.55	863.726	408.584	371.929	360.369	318.882	257.491	9.55771	22.3986	1972.95
TGME49_318675	3'5'-cyclic nucleotide phosphodiesterase PDE8	PDE8	69.987	396.315	1267.63	2052.27	2202.75	2031.71	859.249	136.552	196.366	140.247
TGME49_241880	3'5'-cyclic nucleotide phosphodiesterase PDE9	PDE9	2420.55	1987.14	767.222	917.773	1081.1	903.159	483.598	3.54097	10.723	21.0461
TGME49_500340	3'5'-cyclic nucleotide phosphodiesterase, putative	N/A	3.6353	1.94679	63.2926	165.687	322.842	398.75	835.244	84.1949	117.958	13.7397
TGME49_263550	39S ribosomal protein L47, mitochondrial precursor, putative	N/A	618.195	2036.72	542.527	489.675	358.583	416.702	207.022	40.1015	231.207	2761.68
TGME49_266850	3-demethylubiquinone-9 3-O-methyltransferase	N/A	406.167	750.073	1026.01	929.663	653.578	819.082	414.118	798.117	1112.85	115.043
TGME49_232090	3-hydroxyacyl-CoA dehydrogenase, NAD binding domain-containing protein	N/A	595.978	190.183	244.064	262.904	435.925	263.281	671.163	1757.68	3437.96	958.908
TGME49_263430	3-hydroxyisobutyrate dehydrogenase	N/A	346.035	226.804	285.914	254.741	225.701	203.514	161.994	4.1193	8.54418	3.54458
TGME49_217740	3-ketoacyl-(acyl-carrier-protein) reductase	N/A	1679.69	265.976	932.838	1024.1	1127.07	815.783	1068.13	7.9813	0	11.9794
TGME49_271888	3-ketoacyl-CoA reductase, putative	N/A	1667.27	1641	1991.38	1692.68	1575.82	1729.78	2080.36	398.012	627.667	970.71
TGME49_304470	3-ketosphinganine reductase, putative	KDHR	499.471	641.176	770.525	716.819	541.658	775.43	525.718	34.4682	67.9039	5.18423
TGME49_285240	3-oxo-5-alpha-steroid 4-dehydrogenase	N/A	3518.52	4307.61	4598.04	3609.99	3059.15	3605.19	3544.87	21.1075	25.8523	7072
TGME49_272180	3-oxo-5-alpha-steroid 4-dehydrogenase	N/A	281.76	161.593	312.977	358.224	378.156	339.066	367.525	1057.8	1968.46	1439.52
TGME49_304480	3-oxo-5-alpha-steroid 4-dehydrogenase	N/A	5.62341	2.53912	60.3294	142.83	200.97	182.148	407.558	114.94	113.458	2.23453
TGME49_293590	3-oxoacyl-acyl-carrier protein synthase I/II, putative	N/A	3242.83	1714.31	2964.5	2442.12	2052.81	2249.85	1919.71	36.0804	26.8778	62.8349
TGME49_209430	40S ribosomal protein S4, putative	N/A	418.707	537.234	994.048	860.155	589.714	683.696	340.464	163.44	100.995	273.753
TGME49_271210	4-alpha-glucanotransferase	N/A	0.319243	2.53912	29.2986	90.6068	194.898	316.103	598.478	20.0835	135.379	4611.83
TGME49_262430	4-hydroxy-3-methylbut-2-en-1-yl diphosphate synthase	N/A	1126.14	1172.99	739.466	748.256	631.003	583.717	367.973	10.6421	106.994	236.747
TGME49_227420	4-hydroxy-3-methylbut-2-enyl diphosphate reductase	LYTB	669.618	368.663	359.546	307.274	255.53	228.537	181.75	46.7062	23.7025	142.984
TGME49_259130	4-hydroxybenzoate polyprenyl transferase	N/A	108.713	7.37568	40.0542	223.474	177.814	169.502	107.052	169.476	255.033	4.21541
TGME49_203420	4'-phosphopantetheinyl transferase domain-containing protein	N/A	366.01	237.871	117.95	180.274	216.54	189.343	299.537	122.215	93.4644	562.528
TGME49_214440	4'-phosphopantetheinyl transferase superfamily protein	N/A	3709.74	1854.8	857.059	674.86	686.651	783.375	808.929	350.878	1095.3	2691.67
TGME49_289230	50S ribosomal protein L12, putative	N/A	276.647	393.382	529.407	397.974	396.96	476.633	470.85	274.22	301.411	191.109
TGME49_225240	50S ribosomal protein L13, putative	N/A	769.562	1094.07	1013.53	1006.93	721.43	863.834	713.432	488.38	626.548	2420.59
TGME49_220150	50S ribosomal protein L16, putative	N/A	397.012	741.791	552.584	496.076	376.055	486.89	477.709	8686.38	8430.7	710.32
TGME49_297170	50S ribosomal protein L17, putative	N/A	295.123	192.735	683.664	471.377	417.209	495.485	402.563	282.379	251.404	35.9788
TGME49_217590	50S ribosomal protein L17, putative	N/A	199.215	190.178	192.88	202	209.562	168.456	154.614	1104.32	1673.69	809.511
TGME49_202350	50S ribosomal protein L21, putative	N/A	569.811	348.657	541.768	615.953	582.182	532.482	686.147	3306.08	6319.13	1035.16
TGME49_288610	50S ribosomal protein L21, putative	N/A	203.792	325.229	428.333	285.801	228.37	237.496	135.082	31.5398	78.1674	531.95
TGME49_260660	50S ribosomal protein L23, putative	N/A	909.26	1103.91	914.479	946.907	876.663	925.602	679.363	104.452	106.047	2404.63
TGME49_239720	50S ribosomal protein l24, putative	N/A	663.81	752.233	635.533	742.237	612.611	667.982	552.257	2964.48	3512.54	2685.07
TGME49_243480	50S ribosomal protein L3, putative	N/A	390.551	265.635	480.647	566.031	467.549	465.781	263.157	294.915	217.387	384.799
TGME49_230050	50S ribosomal protein L3, putative	N/A	296.336	331.243	415.896	442.08	407.35	385.008	342.403	8334.99	9435.23	484.27
TGME49_308930	50S ribosomal protein L33, putative	N/A	555.913	690.955	767.693	657.515	559.711	685.104	478.156	39.5598	56.0335	1022.37
TGME49_263020	50S ribosomal protein L33, putative	N/A	40.7023	112.39	61.8085	64.3907	64.0549	66.8952	97.0625	0	0	39.7376
TGME49_223660	50S ribosomal protein L4, putative	N/A	632.234	959.236	1087.06	887.14	820.364	701.012	899.729	4760.16	3692.06	1822.68
TGME49_284010	5'-3' exonuclease, N-terminal resolvase family domain-containing protein	N/A	270.58	87.8959	170.502	188.183	158.713	169.419	134.859	0	0.79685	2.40308
TGME49_305780	5'-3' exoribonuclease, putative	N/A	547.386	452.935	939.018	859.101	828.762	721.174	761.068	1906.71	1824.53	470.156
TGME49_258690	5-aminolevulinic acid synthase domain-containing protein	N/A	1343.28	585.142	942.481	1064.05	1081.12	888.858	767.107	5.68152	4.84235	58.728
TGME49_233905	5'-AMP-activated protein kinase subunit alpha	AMPKalpha	669.933	345.155	677.576	627.233	626.762	637.513	604.665	884.976	1401.99	510.457
TGME49_268960	5'-AMP-activated protein kinase subunit beta	AMPKbeta	813.127	927.363	1057.16	1002.21	911.669	910.934	842.998	2672.21	1770.06	3026.88
TGME49_239870	5'-AMP-activated protein kinase subunit gamma	AMPKgamma	698.278	708.863	671.044	683.694	652.218	571.768	591.321	507.823	573.569	1485.53
TGME49_208090	5-formyltetrahydrofolate cyclo-ligase	N/A	176.695	10.8027	138.138	178.865	160.256	175.834	194.871	478.703	327.563	165.779
TGME49_216810	5'-nucleotidase, C-terminal domain-containing protein	N/A	2291.36	1461.62	543.389	554.713	675.463	654.279	1277.47	1743.07	2500.52	362.866
TGME49_239620	5'-nucleotidase, C-terminal domain-containing protein	N/A	569.966	669.687	397.098	563.943	704.291	600.237	520.127	2175.56	3083.79	1028.27
TGME49_285750	6,7-dihydropteridine reductase	N/A	270.589	468.432	409.832	413.411	402.64	506.013	815.415	14233.2	12887.7	629.76
TGME49_312680	60S ribosomal protein L27, putative	N/A	723.611	474.882	529.441	484.772	416.233	401.341	446.547	203.015	149.667	311.945
TGME49_313560	60S ribosomal protein L7a, putative	N/A	1300.91	743.623	1489.29	1515.58	1430.18	1301.18	840.612	496.186	697.735	1073.11
TGME49_250730	60S ribosomal protein L7-B, putative	N/A	730.939	761.769	1064.96	968.288	811.098	807.92	543.311	375.736	265.435	1769.4
TGME49_271280	60S ribosome subunit biogenesis protein NIP7, putative	N/A	360.169	531.141	705.872	671.41	522.703	595.971	273.296	2.83064	0.36287	129.938
TGME49_240890	6-phosphofructokinase	PFK1	1646.66	2234.41	2183.54	1917.85	2032.87	2147.44	2557.47	3996.13	2504.04	4053.84
TGME49_307850	6-phosphogluconate dehydrogenase	N/A	1090.72	1738.86	1592.22	1775.21	1892.05	2444.91	5469.27	2856.58	5088.51	5694.73
TGME49_242600	6-phosphogluconate dehydrogenase	N/A	3.1935	0	3.49094	10.8699	6.63152	10.4076	14.6116	10820.4	20698.7	2440.41
TGME49_305800	6-pyruvoyl tetrahydrobiopterin synthase	N/A	601.225	481.803	627.263	563.514	447.556	480.611	311.838	126.904	167.202	772.508
TGME49_294880	8-oxoguanine DNA glycosylase, N-terminal domain-containing protein	N/A	295.378	148.128	188.038	210.177	194.753	190.226	238.705	1092.16	501.562	660.054
TGME49_211690	AAA family protein	N/A	831.091	212.222	1626.33	1424.96	1386.51	1146.97	1292.97	3387.61	2315.91	561.449
TGME49_314280	AAR2 protein	N/A	233.792	259.856	403.418	367.808	332.892	372.492	372.371	4773.6	3355.89	1002
TGME49_313830	AARP2CN (NUC121) domain-containing protein	N/A	860.174	961.495	862.579	1048.94	950.744	822.761	506.261	168.822	150.857	220.653
TGME49_269000	ABC transporter family protein	N/A	331.606	227.962	400.557	520.33	607.895	547.587	1100.56	6462.2	7744.43	686.143
TGME49_305590	ABC transporter transmembrane region domain-containing protein	N/A	1472.71	604.825	283.368	318.013	404.367	273.677	226.33	293.887	361.004	67.0624
TGME49_273360	ABC transporter transmembrane region domain-containing protein	N/A	830.502	951.785	632.914	680.217	769.907	760.27	927.536	5.54544	6.22837	2361.43
TGME49_209190	ABC transporter transmembrane region domain-containing protein	N/A	733.668	859.808	775.842	709.648	614.143	671.38	373.638	24.5753	32.3066	908.775
TGME49_239020	ABC transporter transmembrane region domain-containing protein	N/A	518.573	1221.04	1350.35	1447.99	1536.86	1411.34	1540.25	175.578	546.493	38.4391
TGME49_320460	ABC transporter transmembrane region domain-containing protein	N/A	383.171	144.71	233.92	208.678	258.616	215.949	246.831	747.238	671.842	440.866
TGME49_263740	ABC transporter transmembrane region domain-containing protein	N/A	162.927	44.2003	216.836	255.667	287.822	216.606	196.212	315.197	251.919	292.718
TGME49_316320	ABC transporter transmembrane region domain-containing protein	N/A	5.12093	129.33	1724.27	1484.04	1740.34	2103.15	1734	4162.32	6610.08	58.0225
TGME49_226790	ABC transporter, ATP-binding domain-containing protein	N/A	406.433	148.516	303.921	272.056	313.493	263.971	301.326	338.79	143.986	115.978
TGME49_305770	ABC transporter, ATP-binding domain-containing protein	N/A	378.267	157.339	280.947	366.752	472.144	451.231	1204.41	4570.5	2811.52	648.472
TGME49_314330	ABC transporter, ATP-binding domain-containing protein	N/A	77.2151	125.594	134.747	261.84	604.82	709.008	4707.61	69246.5	94494	6064.98
TGME49_208050	ABC transporter, putative	N/A	596.454	338.306	483.507	379.794	449.13	370.144	304.979	10.5333	8.76926	7.04013
TGME49_246600	ABC1 family protein	N/A	1162.81	940.287	182.391	234.318	301.062	275.885	558.669	7790.65	4874.1	634.945
TGME49_202160	ABC1 family protein	N/A	604.264	491.29	696.464	713.85	655.673	599.776	457.729	339.224	223.434	493.143
TGME49_259115	ABC1 family protein	N/A	452.84	221.326	431.328	383.181	445.037	424.213	656.849	4855.7	2436.17	271.514
TGME49_213620	ABC1 family protein	N/A	180.537	240.851	75.2003	88.4527	243.138	330.413	2104.81	25603.9	43036.2	547.086
TGME49_203940	ABC1 protein	N/A	274.02	201.379	384.524	405.849	437.413	414.017	257.491	21.8573	25.1185	345.7
TGME49_301120	acetyl-CoA acetyltransferase	N/A	646.908	571.239	383.212	389.96	376.638	418.065	561.576	3324.29	4240.94	2137.07
TGME49_273740	acetyl-CoA acyltransferase B, putative	N/A	7.51988	64.0237	114.386	220.564	338.086	488.478	1636.94	28279.3	41800.8	5844.91
TGME49_221320	acetyl-CoA carboxylase ACC1	ACC1	2296.6	1184.84	2272.11	2264.09	2344.69	2153.1	1657.82	185.218	162.613	565.411
TGME49_218560	acetyl-coA carboxylase ACC2	ACC2	2480.65	940.666	1845.68	2002.47	2893.89	2519.46	5197.47	901.236	961.33	1219.22
TGME49_266640	acetyl-CoA synthetase ACS	ACS	4874.35	2689.89	1768.83	1480.92	1222.54	1477.6	2415.31	609.805	400.448	2490.38
TGME49_215940	acetyl-CoA transporter AT1	AT1	983.565	365.827	849.513	710.086	704.855	664.531	726.403	1601.6	2702.13	46.1797
TGME49_243600	acetyltransferase, GNAT family protein	GNA1	1796.72	4678.93	2235.99	2784.92	3459.8	3540.87	8494.46	53312.2	95652	49206
TGME49_219250	acetyltransferase, GNAT family protein	N/A	1171.12	1318.63	1133.57	960.04	981.442	958.666	859.771	1022.82	1765.72	6765.38
TGME49_230060	acetyltransferase, GNAT family protein	N/A	648.205	805.065	728.208	746.466	562.407	750.319	1008.2	3663.43	8398.68	179.07
TGME49_305450	acetyltransferase, GNAT family protein	NAT8	581.093	172.218	610.723	522.964	714.473	551.044	1083.94	3511.34	3058.96	1964.1
TGME49_260010	acetyltransferase, GNAT family protein	N/A	373.89	558.828	955.188	897.939	711.892	849.634	742.282	897.242	943.894	508.689
TGME49_219180	acetyltransferase, GNAT family protein	N/A	329.99	716.367	145.064	240.633	235.158	246.763	108.841	98.2447	102.168	106.147
TGME49_260550	acetyltransferase, GNAT family protein	N/A	289.5	610.788	357.756	356.437	275.83	371.531	436.11	126.217	111.142	437.105
TGME49_221160	acetyltransferase, GNAT family protein	N/A	244.628	203.273	1002.9	1077.89	1109.22	1110.8	977.185	2472.79	2050.12	2039.78
TGME49_259070	acetyltransferase, GNAT family protein	N/A	161.787	332.555	366.831	318.958	237.339	275.451	183.986	144.043	90.4276	174.209
TGME49_228160	acid phosphatase	N/A	2.36692	1.94679	394.234	623.407	867.26	733.484	293.2	4.71567	14.9529	9.30642
TGME49_226730	aconitate hydratase ACN/IRP	N/A	3402.03	1823.6	5386.34	5193.7	5494.28	4825.36	7951	22964.8	16348.3	6449.17
TGME49_251490	ACR, COG2135 domain-containing protein	N/A	544.533	1272.95	372.755	349.255	327.103	352.819	264.275	1334.38	668.786	519.818
TGME49_205150	ACR, YagE family COG1723 domain-containing protein	N/A	367.261	378.77	174.16	272.394	304.092	232.001	325.256	2043.05	1918.38	36.3919
TGME49_216275	ACR, YggU family COG1872 domain-containing protein	N/A	105.79	74.092	202.33	167.103	124.133	162.239	102.132	143.572	170.088	404.889
TGME49_209030	actin ACT1	ACT1	34507	33507	40560.4	51431.7	48432.6	42347.5	36840.6	18099.2	31283.5	98220.9
TGME49_220400	actin depolymerizing factor ADF	ADF	16079.7	18241.3	25747.8	27970.1	26039.4	24650.2	22745.9	13880.9	20301.8	74697.2
TGME49_219280	actin like protein ALP1	ALP1	1365.37	1516.48	1315.25	1469.52	1595.26	1448.05	1521.39	4003.29	4056.89	3075.97
TGME49_258050	actin like protein ALP2a	ALP2A	393.106	208.33	302.058	368.763	389.67	330.315	385.641	546.477	330.24	520.27
TGME49_234670	actin-like family protein	N/A	440.145	44.2003	185.58	124.671	127.077	116.757	92.2914	1.24843	12.9022	25.7446
TGME49_269240	actin-like family protein	N/A	226.139	218.223	358.169	330.582	315.014	351.547	478.827	1226.53	1046.21	185.534
TGME49_257710	actin-like protein ALP 5	ALP5	540.414	367.472	474.19	498.201	464.531	472.473	567.465	179.579	98.0741	310.429
TGME49_248890	actin-like protein ALP3b	ALP3B	549.517	135.677	544.902	525.424	569.665	452.77	471.894	298.149	107.637	397.703
TGME49_221410	actin-like protein ALP4	ALP4	996.16	688.379	355.138	243.198	274.641	289.651	365.587	601.257	520.751	400.787
TGME49_294850	actin-like protein ALP7	ALP7	8.59144	146.216	8.95176	118.579	156.474	199.348	374.011	417.581	2215.95	194.564
TGME49_248630	actin-related protein ARP1	ARP1	1407.42	1590.91	694.545	732.87	713.317	677.258	700.758	271.784	325.308	2085.27
TGME49_253040	actin-related protein ARP4A	ARP4A	478.646	611.542	678.903	661.381	653.623	723.194	464.663	120.529	104.733	6.33852
TGME49_223390	activating signal cointegrator 1 complex subunit 3 family 1 ASCC3L1, putative	N/A	1816.08	1679.73	2155.21	2102.35	2436.15	2071.78	2007.52	1169.73	614.459	4594.29
TGME49_249810	activating signal cointegrator 1 complex subunit 3, putative	N/A	426.456	172.249	648.288	585.494	601.816	576.931	672.579	345.022	158.425	584.609
TGME49_244020	activator of hsp90 atpase 1 family protein	N/A	441.936	1153.56	1129.05	1163.27	786.508	1142.3	705.231	47.2448	46.8695	30.1705
TGME49_210800	activator of hsp90 ATPase, putative	N/A	371.201	543.494	806.386	892.261	831.119	787.155	956.088	319.554	181.458	608.059
TGME49_264080	acyl carrier protein ACP	ACP	2218.71	1285.24	4897.02	3939.95	2997.9	3677.97	2889.96	86.9339	140.138	6.89862
TGME49_270310	acyl carrier protein, mitochondrial	mACP	534.755	1185.9	1142.18	1007.3	777.723	1020.48	610.853	141.667	183.57	2293.65
TGME49_225990	acyl transferase domain-containing protein	N/A	429.539	150.08	1006.58	1013.92	848.673	938.373	659.757	295.559	271.487	24.9435
TGME49_246800	acylaminoacyl-peptidase, putative	N/A	1483.95	987.714	773.364	711.946	589.48	638.676	573.131	2253.5	1104.88	153.994
TGME49_249970	acylated pleckstrin-homology domain-containing protein APH	APH	1546.46	3509.28	1029.78	1473.34	1548.26	1454.13	590.501	1027.21	1283.76	15354.6
TGME49_251550	acyl-CoA binding protein ACBP1	N/A	227.068	793.02	2071.48	1879.5	1788.48	2193.36	3262.11	17591.1	25367.3	3089.12
TGME49_234510	acyl-CoA binding protein ACBP2	ACBP2	770.78	2431.46	950.493	876.806	685.009	898.181	819.067	10723.1	13403.9	1784.81
TGME49_269680	acyl-CoA carboxyltransferase beta chain, putative	N/A	0	1.94679	0	0.348519	0.969919	5.26654	3.13105	169.084	2508.43	262.857
TGME49_231900	acyl-CoA dehydrogenase domain-containing protein	N/A	4.71088	5.27836	106.587	176.01	260.317	455.321	1507.3	39255.5	48646.3	6845.79
TGME49_247500	acyl-CoA dehydrogenase, middle domain-containing protein	N/A	16.1469	5.86304	349.978	612.413	1038.22	1584.67	6375.63	51350.4	34024.2	18255.1
TGME49_315480	acyl-CoA dehydrogenase, middle domain-containing protein	N/A	11.0568	174.171	111.419	188.377	362.179	661.902	3064.25	62972.6	82750.8	15151.7
TGME49_297220	acyl-CoA synthetase ACS1	ACS1	285.608	672.439	475.734	496.588	811.545	791.51	2927.9	406.334	269.074	1395.73
TGME49_310150	acyl-CoA synthetase ACS2, putative	ACS2	2266.77	1778.12	1990.23	2276.66	2748.95	2289.36	4636.78	1027.94	1180.04	7680.27
TGME49_310080	acyl-CoA synthetase ACS3, putative	ACS3	1155.82	699.627	1286.79	1290.83	1247.04	1044.77	1695.98	13766.8	15533.5	2390.76
TGME49_243800	acyl-CoA synthetase ACS4, putative	ACS4	2033.19	719.96	2921.69	2550.62	2103.87	2253.97	1720.36	19.4679	17.0003	2350.75
TGME49_247760	acyl-CoA synthetase ACS5, putative	ACS5	2456.21	2641.49	1579.03	1626.4	1498.72	1625.56	3250.85	41285.2	66019.2	4140.88
TGME49_232580	acyl-CoA synthetase ACS6, putative	ACS6	24.0376	80.1871	129.005	266.245	558.483	788.517	3228.86	49522.3	64458.7	2285.7
TGME49_276155	acyl-CoA synthetase ACS7, putative	ACS7	127.118	199.564	393.843	392.672	539.035	587.772	867.673	1022.54	792.029	26.0209
TGME49_263710	acyl-CoA:cholesterol acyltransferase alpha ACAT1-alpha	ACAT1A	652.204	559.87	302.868	343.39	290.551	301.494	284.627	77.1469	70.5136	54.4178
TGME49_232730	acyl-CoA:diacylglycerol acyltransferase 1-related enzyme	N/A	1005.38	1277.33	1836.79	1514.4	1243.72	1527.39	2003.57	15701.5	27827	1215.41
TGME49_240860	acyl-glycerol-3-phosphate acyltransferase AGPAT	AGPAT	967.482	918.124	867.989	719.988	696.301	756.012	1147.83	15416.5	28251.4	3431.11
TGME49_258940	acylphosphatase family protein	N/A	218.088	597.431	332.552	374.725	260.371	267.373	219.621	1.11567	0	569.385
TGME49_297640	acyltransferase ATS2	ATS2	273.415	196.428	694.15	563.176	541.19	499.977	927.685	9984.95	9167.98	380.175
TGME49_223910	acyltransferase domain-containing protein	N/A	1128.19	1135.71	1117	1026.78	814.893	1029.02	700.088	75.7099	79.854	921.32
TGME49_217050	ADA2-A transcriptional co-activator SAGA component	N/A	984.435	895.429	677.502	787.544	856.731	644.984	649.245	523.684	270.054	1155.49
TGME49_263330	Adaptin ear-binding coat-associated protein 2 (NECAP-2) isoform 2 family protein	N/A	438.728	746.313	373.68	344.219	305.518	336.957	292.902	201.489	139.096	934.597
TGME49_500306	adaptor complexes medium subunit family protein	N/A	1675.22	1142.92	1378.5	1609.13	1674.11	1513.88	2492.69	1663.7	1053.34	1331.54
TGME49_215130	adaptor-related protein complex 3, sigma 2 subunit	N/A	771.498	1532.38	925.636	828.817	631.671	856.886	966.003	2797.72	1872.38	1007.39
TGME49_249900	adenine nucleotide translocator	ANT	6341.63	5856.28	19110	18292.6	11180.5	14526.3	8655.93	118.093	176.115	38.3292
TGME49_254580	adenine nucleotide transporter ANT	ANT	1135.23	769.072	1492.37	1520.7	1302.86	1672.58	2344.93	22177.6	20287.1	352.156
TGME49_250880	adenosine kinase	N/A	1521.22	1263.25	2788.02	3971.06	2769.31	2586.86	1702.4	671.328	1260.16	236.03
TGME49_244440	adenosine transporter AT1	AT1	1952.43	565.525	11319.1	12391.5	7989.3	4872.88	4994.47	4.66281	13.5796	257.157
TGME49_215480	Adenosine/AMP deaminase domain-containing protein	N/A	503.102	568.803	355.664	348.129	385.383	426.601	603.025	789.111	1124.49	42.2337
TGME49_205720	Adenosine/AMP deaminase domain-containing protein	N/A	239.953	526.58	504.606	394.256	283.841	410.984	262.859	630.8	816.614	110.795
TGME49_225050	adenosylhomocysteinase, putative	N/A	2783.08	1088.29	2878.84	3266.93	3072	2463.29	2419.33	5877.61	6332.74	135.763
TGME49_289170	adenylate cyclase alpha 1	N/A	5.32211	82.8466	11.8777	108.675	216.762	169.16	565.9	234.749	384.653	15.1134
TGME49_216280	adenylate cyclase alpha 2	N/A	28.7568	182.856	96.7685	285.714	356.771	486.571	849.781	42.2303	36.9514	16.0145
TGME49_230555	adenylate cyclase alpha 3	N/A	6.5627	5.86304	170.945	401.402	516.967	754.128	1201.5	209.446	250.226	205.31
TGME49_270865	adenylate cyclase beta	N/A	1798.39	1284.23	245.279	317.14	434.834	344.963	389.592	834.489	1456.08	4927.28
TGME49_288320	adenylate kinase	N/A	99.7182	395.342	265.521	239.455	184.544	235.367	175.637	2299.01	3443.47	579.416
TGME49_307603	adenylate kinase	N/A	0.170556	0	23.0924	118.018	235.345	307.288	655.955	3924.75	3906.45	96.4884
TGME49_258640	adenylate kinase superfamily protein	N/A	138.533	113.446	191.595	153.265	118.369	133.102	101.163	18.5948	4.55983	186.398
TGME49_281970	adenylate kinase superfamily protein	N/A	3.01031	1.2004	35.5417	70.5741	124.689	233.578	541.895	14.0065	14.6314	9.52023
TGME49_224900	adenylate kinase, putative	N/A	2723.2	4794	5293.38	4983.14	3897.65	4421.67	3231.69	35.5701	31.5833	3864.58
TGME49_277760	adenylosuccinate lyase, putative	N/A	1078.1	831.154	1225.84	1344.56	1260.23	1272.62	1932.01	17613.8	19992.8	3712.35
TGME49_263190	adenylosuccinate lyase, putative	N/A	324.914	214.862	605.114	743.367	726.446	631.204	719.247	195.736	131.338	1036.38
TGME49_279450	adenylosuccinate synthetase, putative	N/A	156.025	1150.42	4524.64	3423.44	2475.64	3119.97	1517.51	97.7933	187.636	84.4811
TGME49_276140	ADP ribosylation factor ARF1	ARF1	5923.93	2692.54	7039.47	7034.95	6528.26	6189.1	7973.89	224.425	177.796	2999.94
TGME49_237700	ADP/ATP carrier protein, putative	N/A	0	0	0.45062	0.348519	0	0.857738	0.223646	0.343258	7.63798	3.84072
TGME49_300360	ADP/ATP translocase	N/A	181.212	168.452	108.927	300.718	403.076	461.009	1391.23	15036.3	17466.7	308.257
TGME49_262860	ADP-ribosylation factor family protein 1, putative	N/A	381.418	811.331	794.718	654.253	577.874	716.327	591.023	100.149	57.0317	113.793
TGME49_212950	ADP-ribosylation factor family protein 2, putative	N/A	773.718	1027.54	1031.64	845.263	675.888	785.388	762.261	1280.1	1659.51	81.0945
TGME49_269780	ADP-ribosylation factor-like protein ArlX1	ARLX1	269.404	358.278	86.5694	51.7743	67.9772	67.7881	157.372	2188.34	3510.18	163.528
TGME49_291800	ADP-ribosylation factor-like protein ArlX2	ARLX2	943.487	447.902	517.256	475.588	430.455	448.941	333.009	2832.28	5712.93	947.893
TGME49_288260	ADP-ribosylation factor-like protein ArlX3	ARLX3	1020.01	1271.62	426.233	374.58	385.107	428.289	802.07	16434.9	17975.5	2925.99
TGME49_240670	adrenodoxin-type ferredoxin, putative	N/A	357.015	476.087	335.198	554.924	390.416	460.983	245.713	133.943	166.995	1534.92
TGME49_205550	AGC kinase	N/A	324.134	235.501	225.805	342.398	369.089	317.022	258.162	186.373	208.241	424.327
TGME49_267540	AGC kinase	N/A	218.173	209.54	537.112	833.185	917.002	580.396	377.739	690.079	886.47	422.998
TGME49_272200	AGC kinase	N/A	29.5228	427.628	301.261	849.356	1447.53	2479.99	12118.8	14858.5	9876.29	614.664
TGME49_240960	AIG2 family protein	N/A	956.066	627.568	417.353	709.817	954.982	889.726	3368.04	50364.3	78504	5408.71
TGME49_315260	alanine dehydrogenase	N/A	5.70106	4.63331	433.108	505.309	657.817	786.13	2139.18	20757.4	18521.5	27550.6
TGME49_203500	alanine dehydrogenase/pyridine nucleotide transhydrogenase domain-containing protein	N/A	13.2415	7.14311	20356.6	24249.3	36163.8	40965.5	117191	534.065	1032.54	194.932
TGME49_500261	alanine--glyoxylate aminotransferase	N/A	1094.73	861.768	3498.66	2771.48	2062.43	2531.57	2009.46	1006.44	1124.53	32.5433
TGME49_221380	alba 1	N/A	9144.88	8195.8	22248.2	19292.3	17731.7	19925.4	19855.5	894.352	594.452	5880.3
TGME49_218820	alba 2	N/A	4610.79	5573.54	8338.64	8278.63	7541.52	7461.22	8391.43	269.062	298.468	8960.38
TGME49_222160	aldehyde dehydrogenase	N/A	2006.61	5168.33	3176.15	2846.86	3127.44	3803.01	9886.06	131745	79060.8	2334.24
TGME49_264000	aldehyde dehydrogenase	N/A	1189.97	2584.2	1466.79	1495.68	1821.41	2084.69	5884.13	2357.43	1370.62	3907.37
TGME49_288450	aldehyde dehydrogenase (NAD) family protein	N/A	225.324	283.951	0.721871	0.910959	6.38621	7.03869	5.51661	52.5763	277.16	1609.54
TGME49_281620	aldo/keto reductase family oxidoreductase	N/A	811.251	519.203	1025.19	741.89	885.762	865.068	1313.25	16480.3	26711.7	3299.04
TGME49_208040	aldo-keto reductase	N/A	460.207	340.449	248.312	228.18	266.653	205.711	164.231	3.02625	21.439	120.534
TGME49_273920	aldose reductase, putative	N/A	1272.41	1402.77	796	735.897	803.464	877.234	1135.68	4245.85	4941.31	326.505
TGME49_314730	ALG6, ALG8 glycosyltransferase family protein	N/A	584.275	908.396	480.279	458.874	425.607	486.27	487.176	955.719	1228.81	302.341
TGME49_262030	ALG6, ALG8 glycosyltransferase family protein	N/A	214.801	12.0399	196.419	314.776	302.432	314.711	275.309	13.6436	18.3393	59.2749
TGME49_286630	alkyl hydroperoxide reductase AHP1	AHP1	4062.02	6549.41	2881.36	2426.25	1749.14	2132.05	1124.57	6.52112	9.41316	85.428
TGME49_246690	alpha amylase, catalytic domain-containing protein	N/A	382.833	254.204	1154.63	1181.14	1722.84	1705.83	4166.83	1448.04	1171.57	29.3505
TGME49_201720	alpha N-terminal protein methyltransferase NTM1	N/A	273.124	239.283	599.255	585.272	432.611	508.653	257.491	107.149	80.6877	144.089
TGME49_316400	alpha tubulin TUBA1	TUBA1	34480.1	19796.2	25654.1	28638.5	27300.4	29369.7	36699.7	86922.1	125979	3721.01
TGME49_238200	alpha/beta hydrolase fold domain-containing protein	N/A	160.397	1593.55	83.9669	145.375	245.561	374.149	1501.79	16999.4	15514.9	806.058
TGME49_250360	alpha/beta hydrolase fold domain-containing protein	N/A	128.79	653.905	707.27	772.406	882.027	809.106	1052.48	259.436	395.334	161.839
TGME49_309890	alpha/beta hydrolase, putative	N/A	370.022	380.361	444.776	360.231	396.834	408.492	343.819	2080.79	2989.83	506.322
TGME49_266310	Alpha-1,3-mannosyl-glycoprotein 2-beta-N-acetylglucosaminyltransferase	N/A	420.986	323.274	522.881	419.266	394.886	415.994	509.019	3986.1	3382.66	120.158
TGME49_283490	Alpha-amylase AMY3, putative	N/A	0.228793	0	83.7123	139.583	351.08	679.902	1512.07	6323.67	19631.4	58.9135
TGME49_254880	Alpha-galactosidase	N/A	3843.14	2671.78	628.37	729.556	601.271	582.037	309.601	3.93213	137.549	149.956
TGME49_214260	alpha-glucan water dikinase 1, putative	N/A	1378.63	1362.25	486.361	658.743	959.056	913.43	1878.85	9257.73	5806.66	1422.97
TGME49_218760	alpha-soluble NSF attachment protein	alphaSNAP	1274.17	897.469	1104.39	919.645	880.732	982.141	938.569	738.511	646.464	1493.54
TGME49_231770	alpha-tubulin I, putative	N/A	0.785181	0	99.8094	315.068	591.501	931.867	3919.77	51501.7	39337	811.595
TGME49_319600	alpha-tubulin N-acetyltransferase, putative	N/A	215.456	181.139	12.0116	86.2075	122.312	120.465	282.614	20.1606	22.1402	37.2425
TGME49_267450	alpha-tubulin suppressor protein	N/A	962.652	557.032	451.118	411.785	392.726	371.757	198.449	44.122	98.4131	4533.43
TGME49_210980	alternative splicing type 3 and, putative	N/A	976.347	1126.11	1847.3	1541.52	1436.16	1607.96	1174.96	945.583	1167.04	1198.28
TGME49_231640	alveolin domain containing intermediate filament IMC1	ALV1	17028.1	3500.11	2052.2	4879.34	6042.84	3834.68	2408.15	5.2293	254.594	1481.22
TGME49_230210	alveolin domain containing intermediate filament IMC10	ALV12	11277	3782.34	2026.43	3270.42	3464.31	2608.41	1401.37	3071.59	5565.71	3758.79
TGME49_239770	alveolin domain containing intermediate filament IMC11	ALV7	1561.27	2026.96	26.7117	6.3395	5.50554	14.4014	11.8533	174.35	995.109	6956.03
TGME49_248700	alveolin domain containing intermediate filament IMC12	IMC12	7323.86	3712.62	10224.4	11061.3	9114.49	7781.43	6943.62	223.504	159.785	7304.2
TGME49_253470	alveolin domain containing intermediate filament IMC13	ALV8	1456.74	3389.11	1042.83	980.022	921.46	1104.55	906.811	10503.8	8656.1	6607.6
TGME49_260540	alveolin domain containing intermediate filament IMC14	ALV9	2382.07	1304.41	384.613	704.395	815.282	636.42	357.834	1823.63	3571.55	9749.76
TGME49_275670	alveolin domain containing intermediate filament IMC15	ALV5	3041.58	2324.02	208.341	253.049	253.426	208.424	112.121	17.7429	60.407	345.847
TGME49_216000	alveolin domain containing intermediate filament IMC3	ALV3	7811.1	1333.18	1080.62	2336.36	3003.6	1508.66	1257.04	24.8605	217.25	1413.54
TGME49_231630	alveolin domain containing intermediate filament IMC4	ALV4	13964.6	3921.93	2562.75	4938.95	4984.1	3723.4	2144.25	9.41528	20.9025	602.154
TGME49_224530	alveolin domain containing intermediate filament IMC5	ALV11	1823.1	545.326	158.3	229.672	280.991	224.196	122.931	9.13227	20.7575	799.267
TGME49_220270	alveolin domain containing intermediate filament IMC6	IMC6	4906.55	1772.83	933.021	1791.47	1981.97	1422.39	787.011	22.8606	261.875	322.048
TGME49_222220	alveolin domain containing intermediate filament IMC7	IMC7	10422.2	4416.98	12071.6	13585.9	13373.7	9171.45	11447.6	151.542	94.2436	35.1643
TGME49_224520	alveolin domain containing intermediate filament IMC8	ALV10	1885.76	1031.88	112.358	201.519	200.373	167.212	85.1347	2.90858	20.5355	4072.3
TGME49_226220	alveolin domain containing intermediate filament IMC9	ALV6	1046.72	283.642	352.159	519.268	582.682	610.156	1825.77	13297.7	7601.11	354.939
TGME49_226060	amino acid transporter AAT1	AAT1	1071.23	995.73	299.063	240.436	268.541	237.128	323.616	874.324	801.519	1329.96
TGME49_227430	amino acid transporter AAT2	AAT2	923.35	1952.27	15.1689	29.1652	35.4438	77.0227	273.296	2110.98	3242.4	89.6235
TGME49_227570	amino acid transporter AAT3	AAT3	1301.21	2810.62	464.431	638.783	1034.43	1526.62	6228.7	151389	285586	16810.9
TGME49_227580	amino acid transporter AAT4	AAT4	2765.88	3735.89	300.775	455.257	663.287	864.688	3205.45	33795.6	76062.5	5954.07
TGME49_309910	amino acid transporter, putative	N/A	774.95	181.697	495.198	501.625	546.765	558.303	809.451	261.764	181.169	999.222
TGME49_221310	aminopeptidase N1	APN1	502.601	870.821	285.118	511.996	772.123	1289.97	5858.49	13795.6	18607.9	4215.49
TGME49_224350	aminopeptidase N2	APN2	3314.15	1900.84	5365.35	4824.73	5309.12	5491	9512.65	26898.1	17821.8	2651.1
TGME49_224460	aminopeptidase N3	APN3	18702.7	4643.56	92.4133	42.4952	74.2419	72.7464	313.925	293.42	492.181	314.185
TGME49_261600	aminopeptidase P	APP	971.106	1534.73	1520.03	1379.79	1127.53	1147.8	1579.24	3081.9	2483.87	1669.91
TGME49_500361	aminopeptidase, putative	N/A	105.123	9.60243	96.2488	165.077	304.653	313.668	1460.04	6177.39	7519.12	155.871
TGME49_310680	aminotransferase, class I/II superfamily protein	N/A	45.4458	268.964	171.809	309.798	395.769	617.99	3070.96	81301.7	123852	1544.63
TGME49_328400	aminotransferase, class V family protein	N/A	10.3753	0	0	2.94775	7.95014	2.89009	22.2155	44.4198	25.5036	0.706974
TGME49_300120	aminotransferase, class V superfamily protein	N/A	2185.35	1815.12	708.498	639.151	741.889	592.085	754.21	476.408	556.798	43.906
TGME49_211090	aminotransferase, class V superfamily protein	N/A	805.73	860.66	669.513	795.234	813.597	923.483	1539.88	26810.7	19235.3	8910.38
TGME49_264030	aminotransferase, putative	N/A	1289.3	1771.37	495.912	641.919	906.756	1684.76	6936.61	24720.6	32106.4	7456.08
TGME49_234440	aminotransferase, putative	N/A	584.827	1530.87	1123.2	1450.22	1917.03	2097.78	4154.9	710.108	693.666	82.8379
TGME49_281500	aminotransferase, putative	N/A	119.333	131.788	13.4062	50.5862	66.4694	56.4605	127.106	77.1495	9.4127	138.768
TGME49_242000	AMMECR1 domain-containing protein	N/A	2734.55	2752.15	765.005	588.471	615.053	774.795	983.969	1078.91	1407.99	3222.87
TGME49_225413	AMMECR1 domain-containing protein	N/A	68.0051	15.5459	12.7211	63.1158	75.7049	95.7374	121.813	32.9631	31.4887	1015.37
TGME49_234280	AMP deaminase	N/A	565.341	771.209	716.124	871.964	897.258	922.345	877.588	475.099	452.462	557.946
TGME49_260830	AMP-activated protein kinase, putative	N/A	29.1175	206.392	555.499	859.001	1375.59	1508.83	4497.9	53306.9	75606.9	1100.35
TGME49_219230	AMP-binding enzyme domain-containing protein	N/A	874.823	1733.45	46.165	133.952	241.235	441.336	1954.74	48954.7	49027.8	6256.13
TGME49_226910	Amylo-alpha-1,6-glucosidase	N/A	739.867	702.617	1121.39	1020.17	1308.23	1225.98	1879.97	6832.6	3856.12	1714.04
TGME49_221910	AN1 family Zinc finger domain-containing protein	N/A	4499.13	3942.17	1823.24	2007.95	2310.01	2879.44	7537.1	128532	204466	13471.5
TGME49_205460	AN1 family Zinc finger domain-containing protein	N/A	656.897	545.744	557.164	524.383	454.49	501.813	526.016	4291.13	6556.67	1175.07
TGME49_267520	anaphase promoting complex subunit 11, putative	N/A	88.8524	49.1164	13.8365	53.0817	36.4957	46.0392	57.6262	25.2659	29.2031	54.1224
TGME49_500124	anaphase-promoting complex subunit 1	APC1	332.63	730.321	234.853	292.294	309.066	372.926	403.16	134.916	121.362	64.2602
TGME49_203440	anaphase-promoting complex subunit APC10	APC10	194.247	94.0322	326.975	271.736	285.274	223.119	190.472	193.656	76.0523	32.0019
TGME49_261230	ankyrin repeat-containing protein	N/A	5588.05	3663.72	2778.07	2288.21	2707.4	2639.95	3378.4	28608.9	39314.3	4874.37
TGME49_255510	ankyrin repeat-containing protein	N/A	1611.34	455.732	1075.03	1063.73	1123.46	956.082	1358.13	723.801	405.88	589.473
TGME49_254660	ankyrin repeat-containing protein	N/A	951.996	2939.69	998.024	1025.52	921.608	1098.09	1232.74	3735.51	2469.42	572.218
TGME49_244060	ankyrin repeat-containing protein	N/A	914.224	1348.08	575.024	524.776	672.529	539.287	869.91	13053	20395.2	2767.67
TGME49_261710	ankyrin repeat-containing protein	N/A	872.741	1940.17	851.384	873	796.379	813.252	506.708	2992.69	4559.84	2303.96
TGME49_214500	ankyrin repeat-containing protein	N/A	505.415	385.432	618.525	553.444	501.095	532.15	434.694	452.895	400.499	970.669
TGME49_288550	ankyrin repeat-containing protein	N/A	485.632	1464.25	173.042	230.573	239.434	324.987	818.098	19327.3	22921.6	2955.14
TGME49_265150	ankyrin repeat-containing protein	N/A	387.639	352.614	596.449	776.069	554.769	615.533	360.816	324.351	300.921	128.99
TGME49_219210	ankyrin repeat-containing protein	N/A	386.738	809.841	826.775	779.64	608.79	760.815	350.305	7.9489	0	1424.39
TGME49_320650	ankyrin repeat-containing protein	N/A	317.711	57.228	150.188	140.59	148.515	149.613	98.8517	19.2921	9.16983	128.249
TGME49_254510	ankyrin repeat-containing protein	N/A	223.612	296.445	296.014	460.224	452.042	362.094	267.779	3.15383	1.08399	20.4327
TGME49_500355	ankyrin repeat-containing protein	N/A	31.1993	331.626	98.8662	170.88	322.123	447.785	925.299	367.889	426.315	378.383
TGME49_305580	ankyrin repeat-containing protein	N/A	5.38808	93.3328	29.8295	71.3177	99.1219	139.99	247.502	720.911	905.846	370.471
TGME49_236595	ankyrin repeat-containing protein	N/A	0	0	5.89455	44.9355	95.7289	123.049	280.602	1425.32	1650.97	37.478
TGME49_500129	ankyrin repeat-containing protein	N/A	0	0	32.9113	84.6339	145.445	227.751	507.752	912.692	803.875	20.1065
TGME49_500175	ankyrin repeat-containing protein	N/A	0	0	36.9256	36.418	72.5845	136.07	253.242	353.019	438.74	5.87295
TGME49_261590	ankyrin, putative	N/A	412.207	824.602	770.468	542.033	527.183	690.092	808.78	865.321	1257.67	508.403
TGME49_254200	anticodon binding domain-containing protein	N/A	426.32	542.154	384.381	352.092	342.287	331.92	257.193	36.4879	54.7015	295.798
TGME49_209140	anti-silencing protein, ASF1 family protein	N/A	1027.74	398.923	1132.15	918.344	751.212	754.397	631.055	40.7323	35.9136	34.472
TGME49_313670	AP-1 complex subunit gamma, putative	N/A	1790.94	1081.61	1585.25	1612.26	1506.36	1497.32	2326.29	7912.29	9560.17	3293.8
TGME49_289770	AP-1 complex subunit mu-1, putative	N/A	1747.96	2131.46	1578.65	1445.92	1227.78	1468.13	1235.2	4498.18	7392.81	2306.12
TGME49_270370	AP-1 complex subunit sigma, putative	N/A	1395.51	905.082	968.449	969.574	850.895	894.405	920.305	1039.03	1019.57	110.836
TGME49_221940	AP-2 complex subunit alpha	AP-2alpha	520.746	410.159	557.699	486.108	555.096	514.03	644.027	1454.3	1684.88	1407.51
TGME49_230920	AP-2 complex subunit mu	AP-2mu	535.822	411.422	488.146	476.568	503.652	461.344	668.404	7797.64	9729.83	1197.04
TGME49_313450	AP-2 complex subunit sigma-1, putative	N/A	257.518	170.147	269.928	204.571	207.911	256.441	286.715	634.456	741.882	242.898
TGME49_208020	AP2 domain transcription factor AP2Ib-1	AP2IB1	39.535	9.23367	692.09	1138.04	1314.96	800.015	578.2	18.4378	8.76926	20.6558
TGME49_252370	AP2 domain transcription factor AP2III-1	AP2III1	1.50518	0	48.4347	130.283	245.522	201.421	636.497	135.379	193.652	8.30522
TGME49_253380	AP2 domain transcription factor AP2III-2	AP2III2	1981.21	959.252	215.955	286.02	457.42	436.457	871.773	10850.1	13121.9	408.321
TGME49_299150	AP2 domain transcription factor AP2III-3	AP2III3	1.06474	47.3176	250.032	248.368	470.925	494.326	3425.67	58631.8	82445.4	755.303
TGME49_299020	AP2 domain transcription factor AP2III-4	AP2III4	19.7536	4.96456	780.438	849.32	1128.81	1119.85	1912.18	1313.46	1710.09	82.7728
TGME49_320700	AP2 domain transcription factor AP2IV-1	AP2IV1	303.927	324.362	426.22	438.902	374.215	366.454	297.673	521.538	311.941	277.349
TGME49_320680	AP2 domain transcription factor AP2IV-2	AP2IV2	40.6372	157.886	443.152	773.527	1113.04	660.531	380.348	174.031	153.325	40.044
TGME49_318610	AP2 domain transcription factor AP2IV-3	AP2IV3	50.7658	245.549	1613.95	1713.63	1783.3	1487.32	705.828	0	11.3496	134.021
TGME49_318470	AP2 domain transcription factor AP2IV-4	AP2IV4	1062.15	557.285	482.453	655.521	775.524	546.569	435.067	10.2411	55.695	72.782
TGME49_211720	AP2 domain transcription factor AP2IV-5	AP2IV5	3043.66	298.532	495.428	806.722	1465.54	1497.7	4219.61	4046.17	8788.18	2992.26
TGME49_267460	AP2 domain transcription factor AP2IX-1	AP2IX1	80.0549	293.313	1284.74	1052.26	701.747	792.52	356.12	76.0595	75.5623	8.64108
TGME49_264485	AP2 domain transcription factor AP2IX-3	AP2IX3	54.3716	13.7017	209.488	299.858	540.131	771.939	1557.55	27.5227	34.5194	87.3025
TGME49_288950	AP2 domain transcription factor AP2IX-4	AP2IX4	763.382	1549.24	206.858	201.073	175.857	205.141	99.8954	1184.17	2335.2	1721.01
TGME49_289710	AP2 domain transcription factor AP2IX-5	AP2IX5	2108	333.767	478.765	538.817	744.435	673.407	2961.97	38764	44929.4	407.34
TGME49_290180	AP2 domain transcription factor AP2IX-6	AP2IX6	179.646	245.894	353.39	333.487	328.331	272.98	285.373	746.918	416.686	269.325
TGME49_290630	AP2 domain transcription factor AP2IX-7	AP2IX7	323.475	228.218	198.418	291.032	282.942	209.635	203.369	492.187	260.098	49.4614
TGME49_306000	AP2 domain transcription factor AP2IX-8	AP2IX8	2522.23	1337.23	1334.38	1170.55	1313.22	1215.46	1732.59	1771	1369.08	1564.59
TGME49_306620	AP2 domain transcription factor AP2IX-9	AP2IX9	481.583	7459.11	1409.25	1150.05	1248.7	1147.47	1155.36	11.306	18.5491	8.49618
TGME49_220530	AP2 domain transcription factor AP2V-1	AP2V1	365.324	315.779	7.3821	22.9344	27.9455	25.039	14.9843	245.975	357.781	1204.75
TGME49_285895	AP2 domain transcription factor AP2V-2	AP2V2	814.122	318.913	530.378	435.317	477.106	650.05	901.742	7913.96	10150.3	235.969
TGME49_240460	AP2 domain transcription factor AP2VI-1	AP2VI1	1028.9	1504.21	412.209	409.385	337.875	341.754	165.424	98.1722	157.018	109.279
TGME49_240900	AP2 domain transcription factor AP2VI-2	AP2VI2	1099.64	793.098	924.588	939.169	1099.09	1114.08	1412.25	798.05	1067.49	87.4089
TGME49_244510	AP2 domain transcription factor AP2VI-3	AP2VI3	314.754	306.66	2062.46	1578.17	1505.99	1781.28	1677.72	9.22756	23.3998	15.5797
TGME49_280470	AP2 domain transcription factor AP2VIIa-1	AP2VIIA1	314.344	1397.23	509.487	696.237	893.98	665.417	328.164	42.964	58.1228	14.5273
TGME49_280460	AP2 domain transcription factor AP2VIIa-2	AP2VIIA2	4883.18	10536.4	618.883	378.183	325.605	352.855	181.899	9.21656	18.777	648.331
TGME49_205650	AP2 domain transcription factor AP2VIIa-3	AP2VIIA3	4795.39	3438.15	542.808	635.238	516.145	560.153	298.642	10.5076	363.767	241.196
TGME49_203710	AP2 domain transcription factor AP2VIIa-4	AP2VIIA4	2324.8	1397.23	2556.09	1699.76	1497.98	1742.84	1157.44	7.1655	13.5443	37.3896
TGME49_203690	AP2 domain transcription factor AP2VIIa-5	AP2VIIA5	1205.53	751.059	823.061	810.16	941.463	972.193	2482.77	10797.5	21345.6	1905.99
TGME49_203050	AP2 domain transcription factor AP2VIIa-6	AP2VIIA6	785.888	1645.93	299.258	345.886	317.85	262.965	118.607	195.118	615.396	445.005
TGME49_202490	AP2 domain transcription factor AP2VIIa-7	AP2VIIA7	1858.25	1038.92	539.977	505.427	593.502	607.644	1323.17	12196.7	10167.6	559.538
TGME49_282210	AP2 domain transcription factor AP2VIIa-8	AP2VIIA8	1098.52	1310.25	175.427	310.781	391.855	96.8182	54.1224	853.467	1204.42	553.274
TGME49_282220	AP2 domain transcription factor AP2VIIa-9	AP2VIIA9	565.907	1130.88	1034.34	969.63	903.314	1005.06	1058.67	4797.03	8567.16	1717.28
TGME49_262420	AP2 domain transcription factor AP2VIIb-1/ADA2-B	APVIIB1	809.76	498.675	340.663	457.665	721.662	541.343	1368.19	1621.66	1162.34	69.791
TGME49_262000	AP2 domain transcription factor AP2VIIb-2	AP2VIIB2	188.176	307.561	331.104	310.462	314.485	286.085	265.394	432.515	238.77	223.534
TGME49_255220	AP2 domain transcription factor AP2VIIb-3	AP2VIIB3	1575.69	1299.36	603.717	547.647	551.89	498.998	382.062	25.3585	27.8332	156.14
TGME49_229370	AP2 domain transcription factor AP2VIII-1	AP2VIII1	794.183	297.4	274.552	286.781	311.014	234.314	283.956	1278.1	1204.48	17.1824
TGME49_233120	AP2 domain transcription factor AP2VIII-2	AP2VIII2	683.315	177.106	330.194	536.871	654.823	485.185	617.04	608.153	171.231	261.043
TGME49_273660	AP2 domain transcription factor AP2VIII-3	AP2VIII3	1600.91	914.312	991.973	1014.41	1056.96	940.209	730.578	42.296	116.67	649.538
TGME49_272710	AP2 domain transcription factor AP2VIII-4	AP2VIII4	773.434	744.862	181.936	294.945	518.68	365.837	539.137	1216.72	1171.26	713.501
TGME49_271200	AP2 domain transcription factor AP2VIII-5	AP2VIII5	734.785	490.224	1293.85	1381.01	1347.34	1454.59	1779.33	290.366	466.582	15.131
TGME49_271030	AP2 domain transcription factor AP2VIII-6	AP2VIII6	5026.13	10656.3	1792.97	1214.01	1339.04	1152.48	1106.75	588.431	674.778	632.99
TGME49_269010	AP2 domain transcription factor AP2VIII-7	AP2VIII7	5187.67	5169.12	702.94	760.864	572.82	443.192	285.969	85.351	982.262	1539.02
TGME49_227900	AP2 domain transcription factor AP2X-1	AP2X1	548.231	556.778	375.409	400.435	499.423	374.759	464.737	3.42438	4.36326	195.28
TGME49_500042	AP2 domain transcription factor AP2X-10	AP2X10	22.9563	211.459	679.895	928.951	1094.65	1378.57	2370.13	41.1567	73.6703	942.807
TGME49_215570	AP2 domain transcription factor AP2X-11	AP2X11	681.794	322.267	156.033	388.056	407.796	310.485	262.113	908.852	910.634	48.3341
TGME49_225110	AP2 domain transcription factor AP2X-2	AP2X2	581.493	149.109	757.317	754.036	991.602	673.66	804.605	1454.79	1617.24	70.6211
TGME49_224230	AP2 domain transcription factor AP2X-3	AP2X3	117.254	107.954	359.942	670.353	990.409	561.773	557.774	386.927	195.379	99.1489
TGME49_224050	AP2 domain transcription factor AP2X-4	AP2X4	966.852	681.29	789.623	873.83	837.613	772.925	569.404	19.0787	20.3973	1918.18
TGME49_237090	AP2 domain transcription factor AP2X-5	AP2X5	3191.55	2401.52	293.077	571.919	841.979	796.668	4061.27	41031.4	49543.2	443.146
TGME49_500344	AP2 domain transcription factor AP2X-6	AP2X6	179.342	109.1	1272.8	889.929	1175.41	1360.79	1288.87	12.8279	41.6505	14.8369
TGME49_214840	AP2 domain transcription factor AP2X-7	AP2X7	6018.29	3184.09	1517.14	1607.07	1783.28	1735.47	2462.72	21049.9	22139	5234.6
TGME49_214960	AP2 domain transcription factor AP2X-8	AP2X8	650.269	302.012	303.922	342.459	409.738	372.227	274.116	163.772	174.254	855.607
TGME49_215150	AP2 domain transcription factor AP2X-9	AP2X9	6604.18	1784.5	1076.48	1122.21	1356.61	1072	1815.11	13223	16739.8	1534.76
TGME49_309410	AP2 domain transcription factor AP2XI-1	AP2XI1	86.9026	147.37	94.9122	199.844	176.431	194.547	79.7672	234.944	1868.7	1575.14
TGME49_310900	AP2 domain transcription factor AP2XI-2	AP2XI2	2787.23	1745.78	890.62	848.569	1205.67	1093.31	1843.52	1705.67	1044.44	1451.49
TGME49_310950	AP2 domain transcription factor AP2XI-3	AP2XI3	1975.54	1187.67	1608.63	1669.03	1724.2	1482.54	1316.68	2423.2	3046.64	1470.06
TGME49_315760	AP2 domain transcription factor AP2XI-4	AP2XI4	853.011	1627.06	274.628	371.188	607.5	388.982	230.505	876.734	1421.92	2961.01
TGME49_216220	AP2 domain transcription factor AP2XI-5	AP2XI5	2124.46	1896.22	1318.39	1565.16	1778.06	1692.83	2379.08	38962.6	51661.9	1549.96
TGME49_218960	AP2 domain transcription factor AP2XII-1	AP2XII1	5623.55	1800.41	204.996	248.9	404.738	323.001	1045.32	5787.47	8903.09	857.308
TGME49_500252	AP2 domain transcription factor AP2XII-10	AP2XII10	246.042	115.163	290.494	297.47	305.231	334.574	271.656	165.379	196.087	656.412
TGME49_217700	AP2 domain transcription factor AP2XII-2	AP2XII2	685.757	403.486	383.791	401.04	425.715	400.119	492.395	142.385	488.07	19.6552
TGME49_246660	AP2 domain transcription factor AP2XII-3	AP2XII3	0.170556	1.2004	0	5.23321	7.4405	10.7331	4.84567	370.25	1384.22	664.69
TGME49_247700	AP2 domain transcription factor AP2XII-4	AP2XII4	1175.99	271.677	680.497	781.696	1201.92	813.388	753.688	100.969	61.5794	393.184
TGME49_247730	AP2 domain transcription factor AP2XII-5	AP2XII5	624.189	1473.34	587.951	426.255	465.034	524.911	360.742	2341.73	5015.62	1112.34
TGME49_249190	AP2 domain transcription factor AP2XII-6	AP2XII6	249.166	9.60243	621.642	512.262	473.607	520.286	450.647	12.1156	16.9133	8.10483
TGME49_250800	AP2 domain transcription factor AP2XII-8	AP2XII8	3137.58	1568.67	527.637	959.68	1175.79	830.9	649.022	31.947	61.9388	877.048
TGME49_251740	AP2 domain transcription factor AP2XII-9	AP2XII9	1404.23	67.8327	119.023	184.339	281.163	148.006	147.607	12.1074	262.511	111.325
TGME49_215895	AP2 domain-containing protein	N/A	105.133	1074.49	365.217	313.856	250.535	280.885	143.805	15.0307	99.8921	5147.97
TGME49_289080	AP-3 complex subunit beta, putative	N/A	585.751	446.07	597.855	649.884	624.267	677.801	1548.97	3293.75	3020.09	229.865
TGME49_309370	AP-3 complex subunit delta, putative	N/A	646.458	430.886	677.704	512.199	516.252	510.058	954.895	1245.75	950.86	690.682
TGME49_301410	AP-4 complex accessory subunit Tepsin, putative	N/A	656.336	283.547	210.929	390.442	420.525	314.086	459.22	2359.48	925.421	480.1
TGME49_266280	AP-4 complex subunit beta, putative	N/A	1313.65	723.208	1018.87	889.069	835.226	902.72	890.932	1351.43	1091.34	2284.19
TGME49_269480	AP-4 complex subunit beta, putative	N/A	710.369	286.767	366.983	388.098	404.492	364.854	640.299	4351.39	4801.85	453.606
TGME49_244290	AP-4 complex subunit epsilon, putative	N/A	919.66	391.202	819.532	700.561	795.454	722.77	869.388	282.619	202.646	261.068
TGME49_207390	AP-4 complex subunit mu, putative	N/A	511.89	373.319	725.9	660.769	582.512	579.932	631.503	1594.84	1297.37	1282.74
TGME49_314418	AP-4 complex subunit sigma, putative	N/A	826.188	491.038	913.343	669.341	593.774	705.579	814.222	10960.3	19062.3	1871.52
TGME49_320550	AP-5 complex subunit beta-1, putative	N/A	1195.07	734.307	501.927	361.286	421.556	362.166	612.493	596.799	717.638	1393.85
TGME49_224160	AP-5 complex subunit mu, putative	N/A	330.547	240.594	168.389	222.7	285.933	251.764	757.192	9403.33	8864.92	263.953
TGME49_220120	AP-5 complex subunit sigma, putative	N/A	294.78	273.125	144.273	185.841	160.909	172.503	200.238	48.0421	14.764	858.315
TGME49_248150	AP-5 complex subunit zeta, putative	N/A	546.691	328.478	204.267	196.291	254.552	207.544	443.863	468.009	226.008	253.46
TGME49_310070	apical annuli methyltransferase AAMT	AAMT	1813.46	914.458	2377.4	2306.26	2203.66	2689.54	3642.83	778.404	701.434	691.739
TGME49_242790	apical annuli protein AAP1	AAP1	1256.83	905.458	502.867	602.51	810.8	898.694	919.112	585.745	293.536	886.058
TGME49_295850	apical annuli protein AAP2	AAP2	1197.36	922.716	200.905	257.259	357.128	301.55	407.856	2425.16	2077.09	1179.05
TGME49_313480	apical annuli protein AAP3	AAP3	608.281	266.715	148.913	161.243	237.794	141.786	191.441	33.7934	175.787	846.144
TGME49_230340	apical annuli protein AAP4	AAP4	1132.92	239.283	361.005	462.411	623.425	361.589	228.79	23.5386	84.0888	1631.34
TGME49_319900	apical annuli protein AAP5	AAP5	912.339	283.642	237.916	230.059	339.523	280.533	388.325	1428.33	2468	442.626
TGME49_222200	apical annuli protein LMBD3	LMBD3	351.958	259.851	478.419	500.504	423.69	416.133	336.513	196.904	146.121	234.803
TGME49_311480	apical cap protein AC1	AC1	1306.38	1924.56	3000.27	3068.23	2801.94	2998.73	2099.59	138.51	207.202	2570.44
TGME49_292950	apical cap protein AC10	AC10	1401.16	2305.09	686.655	690.823	789.456	900.618	1348.74	180.168	1368.02	1430
TGME49_266080	apical cap protein AC11	AC11	9784.28	17469.7	10.089	8.46492	4.94933	2.67269	0.521841	189.551	5066.2	3311.88
TGME49_249440	apical cap protein AC12	AC12	1717.82	1394.85	560.029	607.917	608.342	486.098	288.429	96.8794	642.901	447.629
TGME49_220900	apical cap protein AC13	AC13	6406.01	2769.32	1025.88	1979.72	2108.59	1402.51	891.156	92.0327	1119.4	950.752
TGME49_250820	apical cap protein AC2	AC2	1793.54	824.63	331.786	602.495	771.226	566.02	270.463	58.2305	80.5835	3250.99
TGME49_308860	apical cap protein AC3	AC3	5359.87	2231.14	743.208	1356.05	1666.93	1100.83	622.855	23.1043	479.178	1157.09
TGME49_214880	apical cap protein AC4	AC4	3176.24	2659.63	238.568	316.985	356.722	275.483	135.381	2.50154	103.968	406.646
TGME49_235380	apical cap protein AC5	AC5	1673.25	1549.93	492.784	499.454	423.656	364.744	208.811	5.66592	171.024	726.705
TGME49_225690	apical cap protein AC7	AC7	2398.03	1437.45	636.124	966.084	1132.46	1016.15	487.922	44.7649	231.456	137.509
TGME49_229640	apical cap protein AC8	AC8	1164.38	973.445	362.729	745.794	1044.04	713.329	429.774	1404.99	868.41	2014.13
TGME49_246950	apical cap protein AC9	AC9	1041.88	1159.52	355.664	422.747	389.007	446.609	656.626	6939.47	7306.01	2370.37
TGME49_216080	apical complex lysine methyltransferase	AKMT	3032.16	6438.76	1666.5	1605.12	1653.01	1569.81	1108.17	154.731	478.105	3436.13
TGME49_255260	apical membrane antigen AMA1	AMA1	16452.3	21047.1	17.6997	12.9345	5.70636	8.30997	4.10018	93.3754	429.6	68669
TGME49_300130	apical membrane antigen AMA2	AMA2	62.2715	3436.32	640.999	980.385	1188.43	741.908	429.028	65.3762	300.297	335.262
TGME49_315730	apical membrane antigen AMA3	AMA3	1.20539	247.217	77.3816	133.28	201.73	237.421	853.658	13886.7	22527.8	1160.42
TGME49_294330	apical membrane antigen AMA4	AMA4	296.608	3241.45	1347.07	2239.26	3496.64	2105.91	1130.01	42.5594	58.1451	418.85
TGME49_315510	apical polar ring protein APR1	APR1	678.202	1055.61	418.09	679.543	638.326	357.822	120.993	106.719	330.382	318.301
TGME49_243545	apical ring protein RNG1	RNG1	6270.3	3176.83	396.968	710.277	837.817	676.889	244.967	5.97006	139.853	15873.1
TGME49_244470	apical ring protein RNG2	RNG2	1740.82	1616.1	533.788	436.004	491.083	484.183	287.46	205.391	387.495	336.003
TGME49_320020	apicomplexan amino acid transporter ApiAT2	ApiAT2	1926.82	1695.9	6335.67	5311.73	4342.78	3585.16	3427.98	12906	20625.5	4541.59
TGME49_318150	apicomplexan amino acid transporter ApiAT3-1	ApiAT3-1	721.473	557.086	941.52	906.452	850.317	841.349	562.843	83.2661	41.7582	759.109
TGME49_248420	apicomplexan amino acid transporter ApiAT3-2	ApiAT3-2	2819.41	2283.41	1227.23	1031.77	873.597	1078.76	1046.22	9057.44	21775.2	3350.94
TGME49_220600	apicomplexan amino acid transporter ApiAT3-3	ApiAT3-3	1363.7	841.187	2400.58	2195.91	1970.77	2405.25	2185.4	3398.26	4069.44	1494.98
TGME49_248610	apicomplexan amino acid transporter ApiAT5-1	ApiAT5-1	682.363	78.081	311.226	574.989	708.053	538.429	889.814	641.873	682.143	281.089
TGME49_205520	apicomplexan amino acid transporter ApiAT5-2	ApiAT5-2	4.15777	143.601	283.763	698.445	1585.74	2210.69	15494.7	369324	487446	3956.14
TGME49_257530	apicomplexan amino acid transporter ApiAT5-3	ApiAT5	23493	24546.4	13305.1	19415.3	13645.8	24386.7	7740.47	7622.66	15131.4	620.314
TGME49_216710	apicomplexan amino acid transporter ApiAT5-4	ApiAT5-4	439.798	394.159	0	1.06737	0.617053	2.08793	4.39838	437.629	967.631	3687.93
TGME49_293420	apicomplexan amino acid transporter ApiAT5-5	ApiAT5-5	453.828	12.8956	0.45062	0.348519	0.882262	2.06675	0.969134	86.8443	1354.01	484.097
TGME49_293425	apicomplexan amino acid transporter ApiAT5-6	ApiAT5-6	33.031	1.94679	0	0.525084	0.344407	0.0354256	0	15.3719	65.3916	428.659
TGME49_240810	apicomplexan amino acid transporter ApiAT6-1	ApiAT6-1	863.044	327.134	1816.72	1934.49	1903.25	1340.81	1400.55	6202.44	9746.88	139.473
TGME49_290860	apicomplexan amino acid transporter ApiAT6-2	SNR1	998.495	727.889	1359.98	1468.19	1496.95	1536.18	1801.1	7460.01	15259.8	637.418
TGME49_249580	apicomplexan amino acid transporter ApiAT6-3	ApiAT6-3	693.842	697.227	1065.89	1054.76	957.887	1027.91	692.036	39.4346	88.54	529.811
TGME49_263230	apicomplexan amino acid transporter ApiAT7-1	ApiAT7-1	2445.5	738.754	2242.7	2663.06	2638.04	2589.46	1714.99	307.079	523.065	1064.74
TGME49_263260	apicomplexan amino acid transporter ApiAT7-2	ApiAT7-2	1973.73	940.551	3906.29	4116.42	4836.75	4365.21	6008.33	7488.45	10194.6	341.113
TGME49_277940	apicomplexan kinetochore protein AKIT1	AKIT1	753.56	371.977	1086.66	801.204	724.835	913.272	867.226	1390.84	855.278	94.5644
TGME49_310730	apicomplexan kinetochore protein AKIT4, putative	AKIT4	1012.27	1258.92	556.639	581.2	534.458	568.469	845.159	832.26	650.37	274.3
TGME49_265770	apicomplexan kinetochore protein AKIT5, putative	AKIT5	1161.88	470.5	676.747	626.668	709.367	653.487	948.559	5302.39	4498.56	126.836
TGME49_289700	apicomplexan kinetochore protein AKIT6, putative	AKIT6	571.494	1644.38	776.566	770.638	597.37	692.328	568.36	2912.03	3081.03	107.755
TGME49_316530	apicomplexan kinetochore protein AKIT7, putative	AKIT7	492.386	464.805	411.168	403.73	361.031	340.417	332.935	675.239	265.894	625.488
TGME49_258450	apicomplexan kinetochore protein AKIT8, putative	AKIT8	935.844	591.128	887.787	624.53	568.629	668.009	726.329	4863.18	5869.66	106.118
TGME49_500364	apicomplexan kinetochore protein AKIT9, putative	AKIT1	662.338	558.074	292.248	345.308	335.256	327.071	379.602	1444.94	812.814	1690.51
TGME49_500005	apicoplast DER1	DER1AP	791.848	462.381	410.548	348.854	288.787	295.844	249.142	518.373	404.533	131.801
TGME49_255370	apicoplast import protein TIC20	TIC20	361.703	535.22	613.056	572.833	419.279	525.437	294.915	9.10916	18.0248	4.72716
TGME49_233540	apicoplast monocarboxylate transporter AMT1	AMT1	548.451	267.667	532.344	538.325	465.529	547.088	439.838	21.2549	34.9058	1169.75
TGME49_297245	apicoplast monocarboxylate transporter AMT2	AMT2	1162.5	310.562	600.589	593.144	638.6	539.351	544.952	20.1606	2.83649	0.778812
TGME49_286050	apicoplast TIC22 protein	TIC22	522.756	619.049	1174.76	777.08	662.141	757.205	508.646	0.974014	1.96654	32.201
TGME49_261070	apicoplast triosephosphate translocator APT1	APT1	2904.31	1887.4	2321.12	2147.89	2097.12	1915.22	1843.89	742.716	930.045	28.9516
TGME49_312110	apicoplast-associated thioredoxin family protein Atrx1	N/A	1225.53	789.252	2120.7	1944.85	1468.07	1481.27	968.687	109.265	84.5209	45.9793
TGME49_310770	apicoplast-associated thioredoxin family protein Atrx2	ATRX2	902.214	2126.97	657.513	555.19	398.278	499.153	290.815	56.5395	96.1838	258.51
TGME49_322200	apocytochrome b, putative	N/A	38.1443	8.45309	21.6752	225.266	127.07	178.4	108.99	28.3769	22.3056	10.5708
TGME49_249650	apolipoprotein A-I binding protein, putative	N/A	716.17	665.36	790.506	650.734	807.032	740.077	1422.99	664.167	632.241	1088.59
TGME49_310810	apyrase	N/A	871.013	450.137	530.627	581.204	687.692	814.015	2220.88	15562.5	8244.35	717.705
TGME49_215450	aquaporin 1	N/A	1539.16	2492.39	188.397	249.158	277.298	442.021	663.484	4704.26	9474.41	1703.13
TGME49_267070	aquaporin 2	AQP2	2094.3	1288.5	102.582	114.806	149.88	165.905	239.376	228.945	4979.9	1508.17
TGME49_314410	aquarius, putative	N/A	1240.82	622.352	2034.87	1586.27	1681.9	1666.32	1244.82	1718.52	1405.96	949.932
TGME49_265020	arabinogalactan protein, putative	N/A	556.785	826.79	980.665	683.225	578.726	749.186	706.573	4575.69	8100.37	1410.02
TGME49_299990	archease family protein	N/A	279.157	459.072	296.485	288.903	232.893	337.154	326.747	4057.07	6582.98	701.629
TGME49_225310	ARF1-directed GTPase-activating protein, putative	N/A	1126.66	2161.15	2476.11	1949.61	1648.62	2004.89	1691.96	598.708	1003.56	2305.86
TGME49_257070	Arf-GAP domain and FG repeat-containing protein AGFG	AGFG	455.32	770.805	513.126	486.182	587.124	561.468	812.283	226.642	541.047	4385.74
TGME49_500055	arginine and glutamate-rich protein, putative	N/A	287.878	394.388	647.391	589.706	441.519	527.278	384.373	90.2208	45.6835	57.8838
TGME49_210840	arginyl-tRNA synthetase family protein	N/A	970.102	685.724	2725.79	3143.99	2243.87	2559.38	1627.55	0.25672	5.71327	752.964
TGME49_310160	argonaute AGO	AGO	26.1356	121.678	92.9015	341.324	642.156	1053.2	6015.49	97135.8	219001	2563.71
TGME49_235980	ARIADNE family protein	N/A	585.835	590.631	437.863	429.75	442.158	429.774	494.855	1575.32	1036.41	121.802
TGME49_246170	ARID/BRIGHT DNA binding domain-containing protein	N/A	1282.46	481.998	997.559	995.96	1167.07	928.724	813.104	69.9738	41.3475	460.134
TGME49_243670	ARM repeats containing protein	N/A	0.170556	1.2004	32.8143	73.9568	167.402	264.548	603.398	480.723	668.147	41.5703
TGME49_242570	armadillo repeat-containing protein	N/A	1795.67	2351.54	243.104	308.203	453.021	579.525	864.989	81.1088	409.184	1217.6
TGME49_273905	armadillo repeat-containing protein	N/A	1263.54	675.396	1084.45	1004.24	1040.51	1034.57	1026.24	715.831	772.568	916.384
TGME49_223780	armadillo repeat-containing protein	N/A	1040.71	669.007	412.255	290.351	340.717	370.396	357.61	510.779	637.416	446.33
TGME49_219738	armadillo repeat-containing protein	N/A	245.55	164.568	461.95	441.311	470.397	432.61	236.991	288.28	234.467	125.127
TGME49_500082	armadillo repeat-containing protein	N/A	61.9218	87.3969	72.0634	116.39	148.891	191.337	381.988	413.915	398.274	343.912
TGME49_500238	armadillo repeat-containing protein	N/A	0.874935	0	30.6782	125.635	307.379	553.996	1242.06	29.4539	24.3542	9.55308
TGME49_261440	armadillo repeats only protein ARO	ARO	3206.85	3566.28	892.34	1063.74	1033.45	764.288	472.565	555.629	907.483	4330.68
TGME49_294770	Armadillo/beta-catenin family repeat-containing protein	N/A	814.599	519.203	839.51	987.047	1009.7	896.793	1209.03	1537.01	1082.42	297.851
TGME49_237600	Armadillo/beta-catenin family repeat-containing protein	N/A	751.925	502.825	706.67	789.664	910.227	553.727	303.488	15.2453	10.9081	42.4527
TGME49_309190	ARO-interacting protein AIP	AIP	1110.4	736.399	96.6745	175.022	238.69	198.46	135.53	14.1314	29.0623	2090.4
TGME49_287510	aromatic amino acid hydrolase AAH1	AAH1	27.5157	147.864	8.95176	21.931	35.3577	48.6372	196.66	1861.44	3598.7	37.568
TGME49_212740	aromatic amino acid hydrolase AAH2	AAH2	4.14015	0	11.6598	26.1415	37.6976	48.6049	68.2867	416.415	2127.82	1764.87
TGME49_307990	arrestin (or s-antigen), n-terminal domain-containing protein	N/A	311.733	644.511	379.241	572.239	584.858	556.336	863.722	2875.26	4428.84	273.753
TGME49_231190	arsenite-activated ATPase family protein	N/A	691.309	820.437	1333.59	1316.91	1066.08	1367.63	1328.16	1013.85	671.442	1341.94
TGME49_270760	asparagine synthase	N/A	143.173	7.14311	18.4475	225.148	221.852	187.742	190.77	813.207	663.781	32.3462
TGME49_253430	asparagine synthetase, putative	N/A	9021.93	4707	4879.76	4562.35	4108.34	3561.85	3960.85	286.183	522.466	19089
TGME49_270510	asparaginyl-tRNA synthetase (NOB+tRNA synthase)	N/A	3406.81	1747.07	4090.69	4691.64	4398.54	3112.98	2815.63	647.696	1255.44	68.3124
TGME49_248600	aspartate aminotransferase	N/A	1518.64	2085.73	1826.6	1950.51	1600.51	1677.49	1713.88	370.789	222.901	2125.09
TGME49_291640	aspartate carbamoyltransferase	N/A	391.513	557.719	946.604	783.132	618.86	670.643	375.502	1.37377	6.70076	1095.02
TGME49_205420	aspartate-semialdehyde dehydrogenase	N/A	11.3268	8.24766	263.229	267.955	293.206	394.806	559.041	3817.46	6150.75	66.5199
TGME49_202530	aspartate-tRNA ligase	N/A	819.441	488.611	2601.21	2390.44	2060.64	2170.11	1698.3	3315.8	5501.16	495.545
TGME49_227090	aspartokinase	N/A	10.7222	238.095	234.04	283.199	404.304	435.795	923.659	9745.79	15118.9	199.062
TGME49_201840	aspartyl protease ASP1	ASP1	3177.22	10819.5	219.038	353.885	605.06	1057.72	4987.46	151918	195416	7317.77
TGME49_262940	aspartyl protease ASP2	ASP2	2.30408	85.4773	0.721871	6.26214	4.40558	11.3887	10.1386	20829.4	60738.9	240.352
TGME49_246550	aspartyl protease ASP3	ASP3	5693.43	7469.23	2358.56	2857.87	2863.05	2410.22	995.152	63.4607	249.716	8303.92
TGME49_209620	aspartyl protease ASP4	ASP4	0.228793	3.49543	0	0	0	1.44994	0.372744	17988.6	44869.1	189.316
TGME49_242720	aspartyl protease ASP5	ASP5	490.402	524.449	808.227	921.542	1057.14	1020.12	2576.78	19952.2	31275.8	372.249
TGME49_272510	aspartyl protease ASP6	ASP6	0	0	0	0.348519	0.617053	2.55184	0.59639	29302.8	77409.9	307.103
TGME49_261530	aspartyl protease ASP7	ASP7	0.170556	0	633.103	1064.43	1843.01	1986.27	7560.14	38248.2	67517	695.724
TGME49_500116	aspartyl/glutamyl-tRNA(Asn/Gln) amidotransferase subunit B, putative	N/A	369.941	70.729	204.261	107.847	115.299	84.5529	81.8546	72.0266	74.4717	67.1596
TGME49_278750	AT hook motif domain-containing protein	N/A	459.734	473.411	386.807	334.45	377.422	496.35	1593.93	13884.3	13559.1	1484.23
TGME49_288600	ATG18/WIPI-like protein PROP1	PROP1	804.849	1668.81	40.1758	162.731	233.339	331.937	1107.94	18338.4	28401.7	1281.37
TGME49_220160	ATG18/WIPI-like protein PROP2	PROP2	230.78	181.089	151.696	176.071	205.041	172.177	188.459	72.7864	38.0274	224.62
TGME49_215090	ATP binding protein, putative	N/A	594.485	504.292	479.63	483.288	469.031	490.275	556.656	853.551	579.082	2394.58
TGME49_285720	ATP binding protein, putative	N/A	304.432	164.089	531.454	460.757	387.853	484.782	363.947	967.439	1285.63	1122.9
TGME49_261950	ATP synthase beta subunit ATP-B	ATPB	3813.62	1315.98	8086.69	9786.56	8556.62	6886.29	6424.76	500.672	639.755	17.3927
TGME49_249720	ATP synthase F0 subunit 9, putative	N/A	4719.95	2052.78	10109	10492.6	8441.46	8102.61	6836.64	3.61742	0.454075	853.781
TGME49_231410	ATP synthase F0 subunit b-like protein	ICAP2	3078.62	3718.28	8802.33	7318.24	5295.59	6607.01	4243.61	101.686	160.4	62.468
TGME49_231910	ATP synthase F1 gamma subunit	N/A	1431.66	1479.51	3898.21	3402.04	2643.28	2974.5	2057.55	21.9731	28.6433	337.946
TGME49_314820	atp synthase F1, epsilon subunit, putative	N/A	861.786	1831.78	2349.69	2276.3	1626.01	2060.25	1214.85	96.8259	62.3593	642.037
TGME49_213069	ATP synthase mitochondrial F1 complex assembly factor 1, putative	ATP11	143.598	137.19	348.549	254.647	230.164	269.716	177.128	0.469249	0.890038	43.1998
TGME49_258060	ATP synthase subunit ATPTG8	ATPTG8	1246.72	730.328	2689.95	2622.98	2339.67	2249.81	2202.39	2193.16	2320.85	965.442
TGME49_285510	ATP synthase subunit ATPTG9	ATPTG9	1608.08	1252.84	3272.5	2930.88	2298.12	2747.8	2126.21	5638.66	6884.93	837.683
TGME49_268830	ATP synthase subunit delta	ICAP18	1885.45	844.543	3724.35	4062.4	3484.89	3243.83	2761.96	486.772	419.197	977.167
TGME49_226000	ATP synthase subunit delta	N/A	1042.01	902.095	1840.06	2115.18	1675.16	1802.8	1323.54	85.3843	87.6481	62.203
TGME49_284540	ATP synthase subunit O	OSCP	1434.96	1320.07	2558.24	2297.97	1850.34	2236.19	1715.22	4032.44	6397.23	503.314
TGME49_282180	ATP synthase-associated protein	ICAP15	2782.67	2911.35	5906.84	4995.33	3784.4	4208.96	2958.54	2.26376	4.03737	2292.42
TGME49_260180	ATP synthase-associated protein	ICAP6	2374.48	1946.39	2724.1	2927.88	2632.46	2482.97	2524.59	5804.6	6502.1	2267.64
TGME49_290030	ATP synthase-associated protein	N/A	1760.34	957.001	2925.61	2835.61	2371.79	2273.85	1952.06	14.7057	16.6822	1169.29
TGME49_225730	ATP synthase-associated protein	N/A	1653.74	3495.02	2618.3	2527.83	1997.33	2287.8	1824.21	794.773	1029.39	1826.18
TGME49_310180	ATP synthase-associated protein	N/A	1539.86	3365.3	3265.2	2851.52	2329.96	2659.37	2120.02	13.2503	14.8624	1078.24
TGME49_310360	ATP synthase-associated protein	N/A	1531.97	1194.56	2507.5	2361.3	1923.01	2177.95	1811.24	1156.92	1436.13	773.81
TGME49_201800	ATP synthase-associated protein	N/A	1518.46	803.694	1784.24	1800.16	1714.59	1341.46	1481.21	557.551	1036.27	811.887
TGME49_270360	ATP synthase-associated protein	N/A	1458.6	1895.18	3277.11	2853.09	1992.36	2213.14	1716.86	832.21	693.925	1354.88
TGME49_215610	ATP synthase-associated protein	ICAP11	1441.18	614.941	1041.75	1391.05	1405.2	1127.43	1373.49	150.713	317.21	2153.39
TGME49_218940	ATP synthase-associated protein	ICAP8	1366.86	965.024	1819.46	1919.81	1759.78	1518.59	1580.14	296.403	301.472	553.47
TGME49_247410	ATP synthase-associated protein	ICAP9	1247.86	1545.46	2403.29	2100.31	1875.99	1994.14	1678.61	4756.58	5424.21	1941.3
TGME49_263080	ATP synthase-associated protein	N/A	1247.17	943.626	2229.84	1795.32	1480.16	1588.76	1340.91	1376.74	1603.54	377.519
TGME49_208440	ATP synthase-associated protein	N/A	1243.66	2807.93	3790.66	3334.2	2403.14	2951.85	2048.45	31.073	32.2648	882.597
TGME49_214930	ATP synthase-associated protein	N/A	1203.33	1637.1	3292.89	3113.82	2764.67	2864.85	2713.35	495.391	531.74	3477.47
TGME49_245450	ATP synthase-associated protein	N/A	1191.73	2111.79	2789.11	2584.15	1909.28	2280.12	1654.01	1608.54	1423.46	769.047
TGME49_500283	ATP:guanido phosphotransferase, putative	N/A	1.94386	205.717	266.714	480.836	619.162	735.47	1351.2	252.036	424.548	131.877
TGME49_218610	ATPase (DUF699) protein	N/A	378.982	17.3094	454.793	758.42	713.211	591.946	375.129	0	2.48473	180.473
TGME49_286932	ATPase family associated with various cellular activities (AAA) domain-containing protein	N/A	216.085	232.061	197.066	338.264	550.915	582.184	1243.62	1270.91	1411.1	1312.82
TGME49_230830	ATPase family associated with various cellular activities (AAA) domain-containing protein	N/A	75.4373	9.23367	41.4477	160.443	514.021	392.185	1277.69	162.824	224.848	234.578
TGME49_242625	ATPase family associated with various cellular activities (AAA) subfamily protein	N/A	270.721	309.128	1290.76	1232.79	1383.78	1433.26	729.609	0.6881	20.127	117.763
TGME49_305340	ATPase MORC	MORC	3030.52	892.725	3160.83	2792.16	3239.56	3049.87	3201.27	437.015	282.986	965.44
TGME49_204400	ATPase synthase subunit alpha, putative	N/A	4292.56	2744.36	7949.74	8813.79	7995.13	6257.97	6509.15	803.767	562.871	2273.5
TGME49_235170	ATPase, AAA family protein	N/A	1796	1875.7	2169.4	1558.26	1181.53	1422.74	850.9	68.4045	153.206	4230.32
TGME49_500389	ATPase, AAA family protein	N/A	1106.49	472.126	814.892	855.374	1214.88	1275.04	1772.02	5338.58	7307.29	210.734
TGME49_270900	ATPase, AAA family protein	N/A	563.499	208.347	394.284	389.121	380.632	312.583	368.793	22.7134	13.4781	58.8649
TGME49_234420	ATPase, AAA family protein	N/A	478.888	195.975	1556.45	1677.03	1479.25	1487.04	848.514	1.72667	3.05382	84.7983
TGME49_312310	ATPase, AAA family protein	N/A	369.974	560.514	46.326	242.201	237.515	240.974	266.586	267.704	183.375	369.363
TGME49_235610	ATPase, AAA family protein	N/A	285.648	152.325	497.745	383.103	300.725	303.033	164.38	483.363	773.893	148.709
TGME49_252250	ATPase, AAA family protein	N/A	141.256	386.647	157.32	187.202	173.189	198.474	178.843	2810.28	2811.54	497.217
TGME49_247390	ATPase, AAA family protein	N/A	131.591	203.852	499.449	301.088	315.945	327.494	232.667	1.49281	2.34345	275.885
TGME49_299168	ATPase, AAA family protein	N/A	109.436	91.6125	92.742	142.658	145.113	126.455	102.877	84.5702	66.2889	96.4753
TGME49_308960	ATPase, AAA family protein	N/A	29.0878	65.9828	734.825	611.932	920.495	952.352	1324.88	222.876	618.331	126.19
TGME49_211050	ATPase, AAA family protein	N/A	1.68561	3.04563	8.25243	49.271	94.33	123.646	259.728	214.502	216.563	19.3708
TGME49_288520	ATPase, AAA family protein	N/A	0.170556	118.99	14.3586	33.7746	43.8716	20.6068	4.17473	31609.4	69774.3	303.455
TGME49_217020	ATPase, AFG1 family protein	N/A	337.14	321.995	689.066	758.502	635.606	637.492	428.208	688.422	945.642	458.27
TGME49_255350	ATPase, putative	N/A	478.088	777.703	563.089	746.69	525.814	636.72	305.725	38.8298	150.6	1689.63
TGME49_293260	ATPase/histidine kinase/DNA gyrase B/HSP90 domain-containing protein	N/A	4859.77	1804.54	1385.39	1368.62	1871.12	1431.25	2425.22	3576	3931.75	79.4385
TGME49_318560	ATPase/histidine kinase/DNA gyrase B/HSP90 domain-containing protein	N/A	578.111	1141.92	542.773	479.762	439.889	628.178	858.206	5037.48	6226.79	1241.92
TGME49_227050	ATPase/histidine kinase/DNA gyrase B/HSP90 domain-containing protein	N/A	303.297	639.23	285.712	346.772	360.57	431.949	685.327	14302.1	25171.7	9311.4
TGME49_247540	ATP-binding cassette G family transporter ABCG107	ABCG107	205.626	590.608	384.945	315.958	365.303	362.447	659.533	2604.81	2517.78	655.506
TGME49_315560	ATP-binding cassette G family transporter ABCG77	ABCG77	112.799	263.547	61.922	163.17	237.68	473.564	1885.26	49845.3	83933.9	5302.7
TGME49_289350	ATP-binding cassette G family transporter ABCG84	ABCG84	434.351	441.494	613.435	646.118	593.725	631.375	585.879	0	1.33609	11.0145
TGME49_244270	ATP-binding cassette G family transporter ABCG87	ABCG87	548.957	475.742	504.841	424.017	472.394	491.631	447.516	524.727	342.489	91.4019
TGME49_290580	ATP-binding cassette G family transporter ABCG89	ABCG89	631.083	663.732	982.909	908.517	807.97	922.257	980.913	580.777	712.859	11.7621
TGME49_288920	ATP-binding cassette G family transporter ABCG96	ABCG96	1897.23	712.94	291.114	740.062	924.623	558.183	466.601	72.5981	28.6433	1370.76
TGME49_249820	ATP-binding cassette sub-family B member 5	N/A	949.141	797.051	369.22	304.055	228.576	246.101	150.067	7.86205	10.723	81.8887
TGME49_216790	ATP-binding cassette sub-family E member 1, putative	N/A	500.354	18.5278	1680.14	1466.26	1197.01	1285.54	1304.53	9255.47	14884.6	624.255
TGME49_318710	ATP-binding cassette sub-family F member 1	N/A	762.135	279.941	1508.55	1379.29	1315.81	1233.45	1316.46	398.38	364.46	260.957
TGME49_260310	ATP-binding cassette transporter ABC.B1	ABCB1	346.158	145.771	3147.04	3183.38	3630.62	2563.56	3890.7	412.747	356.68	438.261
TGME49_213650	ATP-binding domain 1 family protein	N/A	592.147	1297.45	589.605	614.259	470.379	564.073	403.682	2149.37	2712.32	2303.23
TGME49_202850	ATP-binding domain-containing protein	N/A	156.71	11.4367	192.18	179.727	203.536	192.406	103.101	83.3042	78.3811	13.5885
TGME49_325500	ATP-binding Mrp/Nbp35 family protein	N/A	7.54445	31.3048	0.721871	11.6938	5.03948	2.13385	4.39838	83.6363	48.6173	36.0916
TGME49_223840	ATP-citrate lyase, putative	N/A	1822.31	1083.92	1933.13	2043.77	2568.06	2586.98	5763.51	375.884	257.627	2534.65
TGME49_318320	ATP-dependent Clp endopeptidase, proteolytic subunit ClpP domain-containing protein	N/A	304.794	288.72	247.453	292.66	319.581	266.032	277.545	285.19	187.39	978.309
TGME49_203270	ATP-dependent Clp endopeptidase, proteolytic subunit ClpP domain-containing protein	N/A	268.331	133.579	152.084	227.712	239.687	265.264	387.43	3485.14	2476.85	206.882
TGME49_295910	ATP-dependent Clp protease adaptor protein ClpS protein	N/A	942.043	1298.79	1211.89	1128.57	955.318	996.33	887.652	705.16	841.347	5007.02
TGME49_248160	ATP-dependent DNA helicase 2 subunit KU70	KU70	449.137	338.826	183.446	135.244	108.542	135.529	158.789	199.659	83.8006	176.72
TGME49_312510	ATP-dependent DNA helicase 2 subunit KU80	KU80	365.991	578.092	218.377	196.623	153.399	181.544	174.668	363.17	380.954	430.043
TGME49_306080	ATP-dependent DNA helicase, RecQ family protein	N/A	690.109	439.255	527.011	482.304	470.457	473.945	595.347	32.7097	24.596	111.605
TGME49_316300	ATP-dependent DNA helicase, RecQ family protein	N/A	342.217	704.148	891.052	712.94	567.9	712.327	611.598	3753.81	5300.68	294.088
TGME49_264840	ATP-dependent DNA helicase, RecQ family protein	N/A	299.821	385.43	164.874	212.07	203.175	251.856	612.716	9178.72	11209.9	352.458
TGME49_259250	ATP-dependent DNA helicase, RecQ family protein	N/A	220.805	302.697	365.062	349.058	312.803	398.066	595.645	5544.24	8200.76	71.172
TGME49_293460	ATP-dependent DNA ligase domain-containing protein	N/A	285.028	228.232	6.38458	66.767	100.215	82.6685	51.8114	255.567	390.986	977.202
TGME49_289780	ATP-dependent hsl protease ATP-binding subunit hslU, putative	N/A	569.402	512.347	613.811	726.805	897.53	1036.78	1599.89	148.288	71.1739	1427.64
TGME49_202630	ATP-dependent metallopeptidase HflB subfamily protein	N/A	1532.01	848.992	1759.74	1929.48	1969.79	1831.22	2182.34	843.61	535.921	3079.88
TGME49_300020	ATP-dependent metallopeptidase HflB subfamily protein	N/A	468.59	395.926	473.868	584.436	596.388	586.329	663.782	4318.36	6888.92	1646.08
TGME49_210730	ATP-dependent protease ATPase subunit ClpY, putative	ClpY	739.471	936.343	873.261	787.078	683.937	774.313	561.278	188.225	167.588	2053.43
TGME49_233520	ATP-dependent RNA helicase	N/A	1233.54	940.273	1663.27	1663.84	1405.26	1474.81	985.833	2037.17	3762.26	121.782
TGME49_207430	ATP-dependent RNA helicase DDX1, putative	N/A	880.107	574.607	653.231	609.296	563.327	551.806	593.93	491.855	511.527	1474.28
TGME49_232530	ATP-dependent RNA helicase SUV3, putative	N/A	441.197	483.801	321.343	270.27	247.143	256.419	162.367	974.901	1339.14	162.561
TGME49_243340	atypical MEK-related kinase (incomplete catalytic triad)	N/A	376.46	184.93	549.998	462.896	424.123	439.135	310.197	88.579	80.842	348.675
TGME49_260030	atypical MEK-related kinase (incomplete catalytic triad)	N/A	241.972	248.774	216.323	209.26	170.307	229.649	265.468	889.694	719.689	61.7901
TGME49_210280	aurora-related kinase ARK1	ARK1	784.667	475.074	880.953	791.952	655.442	819.309	1393.47	16142.3	29269.2	309.791
TGME49_318770	aurora-related kinase ARK2	ARK2	727.968	99.6363	420.276	394.38	422.83	449.091	667.882	951.897	640.857	520.461
TGME49_203010	aurora-related kinase ARK3	ARK3	1440.85	1230.32	345.195	355.968	341.302	314.178	190.472	40.0716	429.544	1059.81
TGME49_206450	autophagy-related cysteine peptidase atg4, putative	N/A	3301.1	2185.52	275.515	178.407	312.261	303.031	1123.6	11212.6	7586.61	1128.84
TGME49_236110	autophagy-related protein 3 atg3, putative	N/A	833.155	867.021	432.327	393.72	436.05	508.987	935.065	1377.66	1046.31	1075.29
TGME49_321300	autophagy-related protein ATG12	ATG12	415.044	800.859	32.3582	201.103	170.803	191.511	248.695	3050.48	4303.21	1195.48
TGME49_230860	autophagy-related protein ATG5, putative	N/A	720.189	564.139	340.352	292.273	393.56	277.228	480.392	537.279	252.329	1591
TGME49_221360	autophagy-related protein ATG6, putative	N/A	617.752	801.381	154.933	328.906	299.448	326.729	741.835	12429.2	18044.8	2718.89
TGME49_229690	autophagy-related protein ATG7	ATG7	1265.45	627.171	474.03	502.501	588.55	553.308	839.643	268.289	492.507	727.389
TGME49_254120	autophagy-related protein ATG8	ATG8	2661.07	10371.1	933.518	906.851	823.662	1172.25	2213.5	43761.4	82177.1	7270
TGME49_260640	autophagy-related protein ATG9	ATG9	797.318	942.444	19.2882	109.201	190.383	284.291	1553.97	3928.53	5254	4356.77
TGME49_258880	axonemal dynein light chain p33, putative	N/A	52.079	203.852	141.259	282.418	382.279	497.857	826.15	258.156	371.205	2085.18
TGME49_288390	B3GNTL1 protein	N/A	325.783	239.079	317.58	386.589	321.499	329.674	166.84	11.0738	2.72307	242.582
TGME49_283765	B9 domain-containing protein	N/A	0.228793	0	58.3666	64.1	87.3514	92.7804	193.827	5.81362	2.06036	6.78904
TGME49_255620	B9-C2 domain-containing protein	N/A	7.89327	150.07	29.8295	122.195	157.02	215.481	424.108	76.2242	81.5872	41.7334
TGME49_259965	Bardet-Biedl syndrome 5, putative	N/A	1.92715	23.7508	82.7068	267.042	491.691	519.055	1850.08	1726.78	2233.58	1255.03
TGME49_294860	basal complex component BCC0	BCC0	545.19	382.468	366.583	253.567	324.072	276.123	565.974	743.355	357.712	57.0567
TGME49_232780	basal complex component BCC1	BCC1	1263.44	972.965	218.442	417.838	412.826	355.282	414.938	498.451	1855.12	170.097
TGME49_310220	basal complex component BCC10	BCC10	1146.23	323.963	285.983	448.192	675.089	596.159	1954.3	21340.3	27267.4	211.149
TGME49_278130	basal complex component BCC11	BCC11	1002.67	1112.25	439.161	446.773	389.48	375.579	209.258	140.169	715.956	240.572
TGME49_231070	basal complex component BCC2	BCC2	2111.72	1624.17	470.416	605.972	661.259	708.514	2138.43	38011.3	40700	582.779
TGME49_311770	basal complex component BCC3	BCC3	795.679	423.045	268.38	402.658	500.095	372.665	291.113	167.931	411.347	275.462
TGME49_229260	basal complex component BCC4	BCC4	734.343	153.383	375.099	371.392	541.659	390.722	890.709	1675.92	967.024	60.9904
TGME49_269460	basal complex component BCC5	BCC5	1386.95	177.106	272.065	457.856	606.161	358.526	1041.15	9989.05	4233.59	117.028
TGME49_202550	basal complex component BCC6	BCC6	1134.78	605.658	346.214	338.249	460.264	351.862	379.826	188.651	270.069	263.271
TGME49_311230	basal complex component BCC7	BCC7	4829.5	3320.07	285.594	414.594	641.966	478.011	241.687	41.9226	128.415	4943.04
TGME49_273050	basal complex component BCC8	BCC8	474.993	1143.89	176.693	229.277	185.404	188.872	75.8161	48.8753	196.905	583.127
TGME49_200330	basal complex component BCC9	BCC9	1225.84	2189.34	220.993	358.519	369.659	317.918	135.082	7.13594	52.6399	2405.76
TGME49_255900	Bax inhibitor-1, putative	N/A	2643.09	11017.7	3379.12	2868.93	2308.47	3314.31	3271.27	31322.1	54387.4	21287.1
TGME49_299190	B-box zinc finger domain-containing protein	N/A	316.073	156.65	180.408	204.291	197.39	182.984	287.236	6942.12	4076.09	187.958
TGME49_263000	BEACH domain-containing protein BDCP	BDCP	955.274	531.141	586.843	432.82	490.397	514.972	508.572	34.7811	35.9298	1403.36
TGME49_299200	Bet3 transport protein, putative	N/A	788.869	1197.41	1078.32	920.296	809.975	830.177	854.18	1256.72	1365.1	975.11
TGME49_240870	beta adaptin protein, putative	N/A	1285.24	1080.36	1613.39	1441.92	1304.28	1287.34	1352.84	2069.8	2054.98	703.975
TGME49_266960	beta tubulin	N/A	17906.9	11749.5	14822.1	16705.5	13849.9	13983.4	17532	109947	117231	7629.31
TGME49_212240	beta-1 tubulin, putative	N/A	0.785181	0	127.749	395.04	797.764	1081.56	2563.06	498.067	648.261	120.617
TGME49_239930	beta-catenin family protein 1, putative	N/A	558.745	746.637	1038.46	869.957	729.265	869.402	602.503	18.787	10.0446	1018.94
TGME49_266990	beta-COP	N/A	2835.82	1723.48	2274.54	2355.52	2565.33	2185.39	3349.77	2318.09	1324.93	1512.77
TGME49_321570	beta-hydroxyacyl-acyl carrier protein dehydratase (FABZ)	FABZ	1476.99	2892.96	1750.48	1654.96	1342.87	1666.33	1335.17	12.2467	54.2351	108.029
TGME49_231890	beta-ketoacyl-acyl carrier protein synthase III, putative	N/A	590.247	496.689	458.8	566.531	568.729	490.772	382.361	0.973581	1.64611	15.1138
TGME49_297420	beta-tubulin cofactor D, putative	N/A	498.83	452.368	559.478	506.413	517.446	607.583	636.87	413.224	641.191	1219.32
TGME49_221620	beta-tubulin, putative	N/A	5981.53	1885.91	4151.9	7708.2	9091.58	7331.54	12296.4	18132.1	23661.6	2272.75
TGME49_271190	bicoid-interacting protein BIN3	BIN3	208.578	288.797	416.57	348.267	335.448	382.31	722.005	10172.5	14265.3	842.441
TGME49_249180	bifunctional dihydrofolate reductase-thymidylate synthase	DHFR-TS	3238.14	1098.28	2201.36	1612.25	1188.2	1416.22	916.354	100.008	64.6108	68.5673
TGME49_230450	bifunctional GMP synthase/glutamine amidotransferase protein	N/A	959.22	819.316	2062.34	2120.48	1654.49	1672.25	891.454	55.3452	74.507	1892.88
TGME49_271350	bifunctional protein FolC subfamily protein	N/A	1385.89	737.304	833.34	694.358	546.238	630.721	394.661	17.1444	41.7167	1228.32
TGME49_268640	BING4CT (NUC141) domain-containing protein	N/A	250.572	307.611	540.607	699.603	536.7	560.183	343.894	253.95	490.671	748.253
TGME49_289760	biotin--protein ligase, putative	N/A	698.144	350.671	318.299	341.027	330.335	397.536	514.163	2879.21	2132.13	2071.74
TGME49_269600	biotin-requiring enzyme domain-containing protein	N/A	123.797	540.654	197.116	446.37	775.024	1309.83	6585.42	99893.7	180629	1730.74
TGME49_225810	BIR protein	N/A	948.144	1104.71	935.104	910.824	760.413	905.632	662.888	320.867	156.309	850.098
TGME49_268620	blood stage antigen 41-3 precursor, putative	N/A	0.228793	8.20233	14.6656	55.0755	42.0315	18.3	3.87654	27814.8	80843	424.711
TGME49_230070	BolA family protein	N/A	264.984	620.839	184.995	234.782	177.784	176.335	81.9291	2.64734	0.36287	177.548
TGME49_259020	bradyzoite antigen BAG1	BAG1	5265.83	181538	22.3641	6.58861	8.14745	6.78004	3.57834	11.6879	13.1318	1.96378
TGME49_311100	bradyzoite formation deficient protein BFD2	BFD2	7931.87	16266.6	8.99779	6.43475	4.9341	5.22556	4.84567	153.213	299.641	244.556
TGME49_253330	bradyzoite pseudokinase BPK1	BPK1	5460.48	81846.7	46.4762	13.3828	8.12413	3.08256	1.26733	45.9801	61.8141	30.7597
TGME49_314250	bradyzoite rhoptry protein BRP1	BRP1	402.887	12664.9	2504.87	3951.15	3150.48	3179.08	1649.54	73.979	578.407	1294.98
TGME49_200385	bradyzoite-formation deficient protein BFD1	BFD1	6113.2	15673.7	54.7558	91.8488	94.7731	107.21	120.993	246.529	854.794	2073.3
TGME49_203450	brain colonization protein BCP1	BCP1	965.085	348.883	1284.04	1122.65	875.21	926.291	629.341	41.9871	26.2284	13.2248
TGME49_297850	Branched-chain-amino-acid aminotransferase	N/A	361.899	1087.01	174.212	240.482	244.47	225.019	77.0089	3022.11	6251.63	2445.35
TGME49_239790	BRCA1 C Terminus (BRCT) domain-containing protein	N/A	1197.63	1208.79	2712.61	2574.9	2177.77	2227.77	1048.16	3.87482	17.5838	126.385
TGME49_237480	BRCA1 C Terminus (BRCT) domain-containing protein	N/A	525.468	289.268	426.977	447.786	484.909	523.288	673.474	550.471	272.553	480.598
TGME49_258480	BRCT domain-containing protein	N/A	993.639	1585.83	1313.84	844.473	766.823	1157.72	1156.48	5309.98	10753.6	914.524
TGME49_232440	Brf1p family coiled coil protein	N/A	4724.72	3176.33	12443.3	10701.3	9204.83	9753.83	8985.36	5279.4	4237.78	2153.11
TGME49_232520	brix domain-containing protein	N/A	418.96	219.6	852.671	972.796	898.488	807.655	503.502	162.397	204.667	622.22
TGME49_273840	brix domain-containing protein	N/A	407.303	406.112	830.798	780.101	803.512	684.054	395.705	4.47983	9.62799	571.499
TGME49_214240	bromodomain-containing protein	N/A	575.7	466.876	651.489	603.59	621.206	537.31	489.785	179.989	164.626	770.802
TGME49_263580	bromodomain-containing protein BDP1	BDP1	1058.1	912.635	1161.61	1190.31	1185.23	1135.17	814.371	113.238	74.4933	2457.34
TGME49_264640	bromodomain-containing protein BDP2	BDP2	2337.74	916.387	1589.73	1515.26	1805.39	1447.68	1353.66	7291.65	11202.7	1864.61
TGME49_258990	bromodomain-containing protein BDP3	BDP3	461.293	253.658	632.147	443.356	431.573	414.874	372.073	232.343	81.9181	162.666
TGME49_306460	bromodomain-containing protein BDP4	BDP4	408.671	398.922	415.65	441.62	433.872	402.3	375.875	426.774	532.666	487.046
TGME49_264020	bromodomain-containing protein BDP5	BDP5	639.113	494.501	605.623	669.471	583.133	538.521	558.967	1172.71	1830.32	1482.16
TGME49_311625	bromodomain-containing protein BDP6, putative	BDP6	354.746	188.99	645.266	513.902	623.388	626.288	1284.33	8340.04	8162.55	433.432
TGME49_220320	BSD domain-containing protein	N/A	320.676	357.188	31.6941	174.527	155.173	176.379	196.734	65.8648	21.5118	556.3
TGME49_266366	BT1 family protein	N/A	3539.96	1532.96	3329.05	4256.23	5256.83	3632.5	4056.27	16366.1	25919.3	2178.98
TGME49_201690	BT1 family protein	N/A	284.52	1101.65	6.49904	10.8511	10.0402	33.1262	23.7811	54.3825	58.3158	2157.34
TGME49_225140	BT1 family protein	N/A	0.575058	3.68196	102.917	435.832	694.338	1313.18	6245.17	5185.01	16489.2	1295.51
TGME49_236020	BT1 family protein	N/A	0.170556	1.94679	141.668	149.217	207.717	266.729	556.507	3237.88	5728.41	61.6168
TGME49_224180	BTB domain-containing protein	N/A	199.641	622.688	0.45062	12.8885	10.7463	19.6105	19.9045	239.509	2239.09	7035.87
TGME49_266860	BTB/POZ domain-containing protein	N/A	350.727	8.45309	121.146	388.947	602.327	1247.77	5495.51	144041	329295	3391.81
TGME49_218930	BTB/POZ domain-containing protein	N/A	195.726	64.6811	130.837	339.62	513.814	585.115	1359.32	811.833	492.58	64.4117
TGME49_270340	BTB/POZ domain-containing protein	N/A	54.9614	7.14311	504.523	415.352	687.797	762.725	2135.52	20122.1	16716.6	480.925
TGME49_229470	Btz domain-containing protein	N/A	787.499	1039.8	1002.73	985.605	967.718	909.694	1281.64	789.837	468.933	1479.46
TGME49_264710	bucentaur or craniofacial development domain-containing protein	N/A	564.991	1092.49	701.85	615.711	522.515	599.17	527.656	110.333	118.255	1215.72
TGME49_226240	bud site selection protein, putative	N/A	223.398	341.663	419.837	445.98	318.392	381.587	143.655	80.3964	167.633	345.647
TGME49_238240	bystin protein	N/A	1412.12	2240.8	2489.27	3350.55	2687.77	2264.75	1357.01	7.86205	8.02561	149.413
TGME49_262470	C protein immunoglobulin-A-binding beta antigen, putative	N/A	14.914	102.218	3.49094	43.5909	44.7062	50.3518	45.0275	251707	650525	2400.29
TGME49_233430	C2 domain containing protein	N/A	440.583	17.0984	284.9	353.897	443.632	313.51	451.542	818.317	425.696	138.028
TGME49_241840	C2 domain-containing protein	N/A	1011.83	1207.79	940.017	1150.13	1156.26	1008.12	1077.68	6784.83	12281.7	3317.55
TGME49_233320	C2 domain-containing protein	N/A	22.2367	142.355	40.1758	58.1538	142.041	230.574	531.906	5589.54	10133.8	67.3852
TGME49_254750	c3orf15 protein	N/A	0.438372	3.04563	22.7131	89.6872	186.435	338.246	556.656	69.8755	187.139	24.5212
TGME49_251570	CAAX amino terminal protease family protein	N/A	77.9582	4.96456	21.6125	105.398	144.548	103.646	116.594	65.4971	95.4433	55.8462
TGME49_221170	CAAX metallo endopeptidase	N/A	989.783	844.814	2178.23	1886.99	1588.39	1809.14	1692.93	2048.38	1820.99	108.262
TGME49_244380	cactin	N/A	1772	2231.14	2412.68	2588.08	2214.74	2252.54	1586.03	1623.58	2853.46	10172.1
TGME49_300340	CAF1 family ribonuclease	N/A	268.975	237.202	546.683	441.073	397.421	377.363	251.9	65.6589	34.1828	426.788
TGME49_233930	CAF1 family ribonuclease	N/A	212.499	202.461	637.823	687.569	586.4	635.327	364.693	81.7324	78.0632	511.403
TGME49_202400	calcium binding egf domain-containing protein	N/A	14.5181	11.4367	698.505	984.675	1823.93	1716.54	6897.18	49822.1	94279.6	1233.92
TGME49_315540	calcium binding egf domain-containing protein	N/A	0.438372	2.53912	0	10.2354	20.681	68.4573	206.575	8290.51	6042.5	1335.15
TGME49_229480	calcium binding protein precursor, putative	N/A	8328.3	6468.01	9560.16	7986.25	6480.94	7289.8	7993.87	4606.97	4185.53	5234.24
TGME49_228750	calcium dependent protein kinase CDPK7	CDPK7	1051.75	939.435	1106.71	848.498	873.321	930.298	961.605	1344.43	1175.4	1923.08
TGME49_292055	calcium dependent protein kinase CDPK8	CDPK8	636.69	889.624	526.898	580.726	612.068	533.679	415.088	11.201	28.1195	2096.75
TGME49_254190	calcium signaling protein kinase MARK, putative	N/A	2.80547	3.90415	209.015	202.079	441.075	942.515	1905.17	95.2485	83.2687	2.43969
TGME49_258010	calcium signaling protein kinase RAD53, putative	N/A	455.195	252.3	281.322	376.403	461.413	322.019	545.324	1810.68	616.904	1227.19
TGME49_207910	calcium/proton exchanger CAX	CAX	828.465	195.59	364.126	431.244	527.514	431.397	430.817	509.298	910.339	920.009
TGME49_315520	calcium-binding egf domain-containing protein CBDP1	CBDP1	39.9794	1196.36	180.956	359.505	336.021	319.141	125.987	28.4943	38.4887	947.118
TGME49_318540	calcium-binding egf domain-containing protein CBDP2	CBDP2	0.663618	0	0	8.42629	9.47212	48.6854	122.856	10376.3	24328.7	497.15
TGME49_269930	calcium-binding egf domain-containing protein CBDP3	CBDP3	72.6203	42.2971	610.601	597.128	1018.12	1027.85	2430.89	4318.8	4959.01	859.438
TGME49_315550	calcium-binding egf domain-containing protein CBDP4	CBDP4	1.48553	0	0	1.47656	1.20018	11.1244	13.5679	647.122	1361.17	1989.25
TGME49_301440	calcium-dependent protein kinase CDPK1	CDPK1	6542.31	3857.6	1198.08	2337.75	2971.76	2029.5	1451.91	839.043	801.369	8768.45
TGME49_225490	calcium-dependent protein kinase CDPK2	CDPK2	2110.18	2040.98	920.552	895.117	969.447	960.937	1665.05	19236.1	36081.2	8007.97
TGME49_206590	calcium-dependent protein kinase CDPK2A	CDPK2A	1522.37	1807.98	1421.56	1830.42	1899.75	1571.32	789.919	52.9033	85.2162	5606.71
TGME49_242400	calcium-dependent protein kinase CDPK2B	CDPK2B	0.621077	10.2483	73.7633	76.3093	214.317	375.192	750.184	55.963	206.791	14.4693
TGME49_305860	calcium-dependent protein kinase CDPK3	CDPK3	1762.89	1634.08	2062.47	2905.43	3558.95	3043.66	2368.56	1198.43	1310.55	5235.3
TGME49_237890	calcium-dependent protein kinase CDPK4	CDPK4	475.987	533.103	952.443	816.86	795.98	714.451	607.349	1.49281	1.33609	27.1326
TGME49_295760	calcium-dependent protein kinase CDPK4A	CDPK4A	994.011	1858.35	476.835	510.802	526.384	531.381	653.793	1999.43	2004.16	764.715
TGME49_240390	calcium-dependent protein kinase CDPK4B	CDPK4B	8.04713	390.779	70.5125	156.803	375.013	487.687	1838.52	1175.02	635.665	12.9473
TGME49_224950	calcium-dependent protein kinase CDPK5	CDPK5	1609.44	4789.81	562.94	897.356	1316.36	972.925	337.93	35.6543	31.5833	306.355
TGME49_218720	calcium-dependent protein kinase CDPK6	CDPK6	1929.51	778.88	126.126	201.202	283.184	214.821	194.423	59.6365	69.6241	4100.77
TGME49_237860	calcium-dependent protein kinase CDPK7A	CDPK7A	557.75	162.893	63.8701	108.007	238.531	208.676	703.219	1819.91	909.544	2022.4
TGME49_217600	calcium-dependent protein kinase CDPK9	CDPK9	1299.91	911.476	523.453	603.904	628.332	564.964	542.864	6503.63	10378.2	5690.8
TGME49_233770	calcium-translocating P-type ATPase, PMCA-type protein	N/A	1079.42	91.9374	235.981	466.672	967.564	947.371	4045.54	905.432	795.393	134.567
TGME49_246930	calmodulin CAM1	CAM1	1354.27	2343.37	327.583	388.172	376.71	356.413	154.092	39.8303	132.54	220.942
TGME49_262010	calmodulin CAM2	CAM2	774.684	1349.94	178.743	337.257	289.54	227.8	157.149	255.879	428.088	1300.86
TGME49_226040	calmodulin CAM3	CAM3	928.839	2863.24	247.485	451.947	375.839	322.28	134.561	134.357	1035.91	410.029
TGME49_249240	calmodulin, putative	N/A	5416.86	8646.81	7931.65	8372.94	6402.92	8152.03	6845.07	15335	17373.1	11755.4
TGME49_297680	calmodulin, putative	N/A	0	0	24.4525	50.5268	95.303	179.146	281.571	6.45165	4.1604	6.55723
TGME49_500158	calmodulin-binding protein, putative	N/A	12.8979	183.04	0	23.7352	88.9312	111.192	278.141	14.1329	91.6968	18.7802
TGME49_293820	calpain family cysteine protease domain-containing protein	N/A	1646.52	1405.26	779.218	814.212	937.343	879.309	1351.27	9676.81	7422.84	1668.3
TGME49_500181	calpain family cysteine protease, putative	N/A	1.85465	73.128	277.934	368.587	401.349	383.269	462.053	1174.87	1563.9	413.365
TGME49_310320	calreticulin family protein	N/A	482.911	106.596	260.872	423.399	388.028	337.432	330.922	20.1606	8.97758	749.775
TGME49_253940	CAM Kinase family, incomplete catalytic triad	N/A	1133.73	873.44	12.4926	88.9043	165.719	196.434	884.074	1257.46	889.216	3337.6
TGME49_306480	CAM kinase, CDPK family	N/A	22.9158	1.2004	357.306	408.996	620.011	384.108	703.219	32.2817	17.57	0.872193
TGME49_315190	CAM kinase, SNF1 family	N/A	619.906	561.664	276.918	361.415	585.031	449.023	224.839	25.1268	116.23	1116.64
TGME49_243500	CAM kinase, SNF1/AMK1 family ToxPK1	N/A	3.6353	1.94679	139.392	231.306	355.486	494.069	1138.36	373.791	513.269	139.809
TGME49_215670	cAMP-dependent protein kinase	N/A	0	1.2004	28.9872	79.4259	117.529	154.551	590.575	1229.68	4635.25	123.895
TGME49_242070	cAMP-dependent protein kinase regulatory subunit 1	PKAR1	6195.3	6018.54	2607.57	3123.62	3266.46	3037.37	3919.03	25005.7	21784.5	13082.3
TGME49_311300	cAMP-dependent protein kinase regulatory subunit 2, putative	PKAR2	2.83468	161.138	319.21	604.007	1143.73	1750.12	3694.56	166.693	463.318	9.19282
TGME49_500249	cAMP-dependent protein kinase regulatory subunit, putative	N/A	3.27112	1.2004	40.3642	50.8878	105.822	147.325	365.587	4.01633	16.9567	6.74019
TGME49_226030	cAMP-dependent protein kinase subunit PKAc1	PKAC1	3091.92	3158.49	1531.43	2209.62	1808.9	1752.83	1993.14	307.671	346.296	4111.5
TGME49_228420	cAMP-dependent protein kinase subunit PKAc2	PKAC2	0.575058	3.49543	233.111	564.346	925.068	1502.59	2575.21	88.816	208.924	320.13
TGME49_286470	cAMP-dependent protein kinase subunit PKAc3	PKAC3	1991.23	2485.13	1607.87	1737.99	1275.52	1417.2	821.751	62.035	114.295	1765.69
TGME49_237450	CAP domain-containing protein	N/A	102.768	38.0401	143.487	203.661	209.548	184.56	80.5872	7.82208	5.15279	284.344
TGME49_288220	CAP domain-containing protein	N/A	68.9778	268.984	6.52308	159.328	253.906	536.794	2590.72	96926.8	117382	2471.49
TGME49_500394	CAP domain-containing protein	AP2X6	3.39531	82.8466	23.0468	127.457	226.871	500.623	2225.06	103686	117614	1302.03
TGME49_305060	CAP-Gly domain-containing protein	N/A	1406.89	1699.78	910.884	936.479	998.696	1128.56	1242.06	4579.63	5549.45	1362.8
TGME49_285220	CAP-Gly domain-containing protein	N/A	594.514	1733.33	579.093	558.54	514.168	630.033	525.196	260.334	234.227	356.44
TGME49_215260	carbamoylphosphate synthetase	N/A	1012.43	688.766	2231.31	2183.78	2258.98	1905.83	1228.79	40.9438	59.5983	24.4026
TGME49_258160	carbohydrate kinase	N/A	337.699	859.003	599.685	570.376	644.94	767.65	1703.66	21639.1	37393.6	4992.94
TGME49_259950	carbonate dehydratase, eukaryotic-type domain-containing protein	N/A	758.678	630.22	531.276	642.813	723.989	732.449	855.074	9.0589	16.531	40.2353
TGME49_297070	carbonic anhydrase-related protein CARP	CARP	12130.9	6051.47	922.806	1292.99	1103.45	925.96	457.133	18.2637	412.363	684.218
TGME49_290890	carbonyl reductase 1, putative	N/A	786.375	1554.6	1551.39	1486.66	1932.85	1940.7	5178.53	5983.29	6864.43	24401.1
TGME49_293810	carboxyvinyl-carboxyphosphonate phosphorylmutase	N/A	593.262	4179.37	757.201	680.837	895.869	1128.89	2041.37	12688.1	14857	1365.15
TGME49_208560	carrier superfamily protein	N/A	2110.18	1849.72	1586.67	1357.15	1164.46	1262.53	1014.31	21.1075	23.4427	357.248
TGME49_314710	carrier superfamily protein	N/A	819.128	1055.07	1258.37	859.223	722.641	854.713	637.317	253.038	653.404	249.747
TGME49_248320	carrier superfamily protein	N/A	510.759	826.792	612.401	751.729	558.331	661.423	354.703	24.1489	36.4295	794.357
TGME49_248950	carrier superfamily protein	N/A	375.121	297.371	283.738	272.801	248.585	240.42	184.135	26.3792	12.9691	178.755
TGME49_202880	carrier superfamily protein	N/A	185.507	11.5902	272.143	197.817	292.982	286.596	1074.1	1522.06	806.424	169.308
TGME49_218770	carrier superfamily protein	N/A	156.357	305.39	239.668	206.865	186.295	208.893	139.406	807.593	1051.74	268.968
TGME49_239080	carrier superfamily protein	N/A	151.318	72.8436	123.066	202.631	220.103	189.183	184.061	95.7914	66.0064	122.412
TGME49_235650	carrier superfamily protein	N/A	18.4784	126.231	187.094	280.618	457.852	533.243	1728.12	7541.52	9557.11	1389.75
TGME49_500437	CASC1 domain-containing protein	N/A	7.62712	3.49543	0	18.7646	62.5146	79.793	199.642	767.676	909.851	5.23735
TGME49_240640	casein kinase I	N/A	3539.47	3200.53	4112.36	4104.44	4018.64	4022	4001.26	16202.4	28028.3	3916.14
TGME49_247710	casein kinase I	N/A	836.081	467.072	478.678	484.516	573.05	578.504	820.335	6367.52	9533.02	1440.22
TGME49_289320	casein kinase I, putative	N/A	1991.5	715.664	1339.37	1293.17	1393.81	1205.17	1457.58	5096.12	9622.71	1313.1
TGME49_272400	casein kinase ii regulatory subunit protein	N/A	1585.55	1854.06	2449.13	1819.76	1538.62	1724.87	1311.39	2338.71	1285.54	1863.97
TGME49_232250	catalase	N/A	9159.19	15584.2	247.803	541.022	805.46	1095.71	4485.53	52156.7	57191.8	37180.5
TGME49_249670	cathepsin B	N/A	3553.29	7097.54	696.867	849.99	1245.27	1225.62	5361.18	90910.5	132842	14330.1
TGME49_289620	cathepsin CPC1	CPC1	3031.55	3553.01	1304.89	1602.98	1819.56	1415.61	638.659	23.8345	46.7285	6236.94
TGME49_276130	cathepsin CPC2	CPC2	1293.81	336.754	393.088	489.91	446.959	376.092	416.206	695.084	858.683	146.018
TGME49_267490	cathepsin CPC3, putative	CPC3	0.663618	14.2029	0	0	0.969919	3.36397	9.24405	40206.2	121603	453.397
TGME49_321530	cathepsin CPL	CPL	3488.08	5069.1	886.985	1364.51	2154.66	1852.03	7122.46	80878.2	103874	34119.9
TGME49_304450	cation-transporting ATPase	N/A	0	38.0416	31.8633	39.7165	29.5806	39.3148	58.5208	30766.1	71037.4	1234.32
TGME49_224190	cation-transporting atpase family protein	N/A	1042.28	350.039	956.563	860.79	959.828	975.974	1313.55	358.714	220.336	554.749
TGME49_219260	cation-transporting ATPase, putative	N/A	1132.89	450.219	663.162	549.652	628.072	538.419	558.296	433.325	450.893	431.907
TGME49_313990	CBF/Mak21 family protein	N/A	293.576	205.507	533.891	613.475	642.076	479.54	340.464	129.354	77.4263	36.6357
TGME49_319658	CBF/Mak21 family protein	N/A	253.707	64.7028	432.111	471.006	431.01	420.03	322.2	254.29	322.607	72.3958
TGME49_307580	CBS domain-containing protein	N/A	1119.7	1896.96	719.74	602.844	644.753	643.655	753.092	3268.08	6586.91	1269.16
TGME49_211350	CBS domain-containing protein	N/A	773.884	111.116	806.469	532.433	572.959	582.786	523.183	42.8911	19.8142	833.542
TGME49_500008	CCCH-type zinc finger protein, putative	N/A	0.743483	2.53912	75.4805	125.663	235.582	482.997	2754.13	121022	184838	1574.44
TGME49_228300	CCDC25 protein	N/A	340.189	398.121	814.015	725.633	531.665	639.464	423.81	978.325	679.152	1196.28
TGME49_260240	ccr4-associated factor family protein	N/A	3835.61	2931.13	2688.46	2580.06	2514.08	2479.78	2211.04	4125.93	3763.28	4450.97
TGME49_291140	CCR4-Not complex component, Not1 protein	N/A	2366.24	1820.4	1883.86	1898.01	2072.36	1764.06	1886.16	3935.42	3684.92	1410.18
TGME49_239410	CCR4-NOT transcription complex subunit 4, putative	N/A	1446.29	545.151	1116.91	1102.12	1349.23	1246.71	2820.7	33489.2	25820.4	1259.58
TGME49_258980	CCR4-NOT transcription complex subunit 9, putative	N/A	683.673	210.658	595.202	600.108	616.599	562.731	621.215	698.566	405.006	470.468
TGME49_205440	CCT chaperonin gamma subunit	N/A	2642.43	3326.05	6795.95	6087.93	4380.69	5122.74	4231.84	3695.77	2432.81	745.857
TGME49_217010	CD2BP2-like protein	N/A	432.036	530.265	597.71	534.703	551.396	491.38	573.131	639.796	313.376	1996.21
TGME49_310630	CDK5 regulatory subunit-associated protein 3, putative	N/A	764.888	399.902	845.944	792.383	712.547	769.246	855.82	1998.56	1295.95	543.071
TGME49_320070	CDK-activating kinase assembly factor MAT1 protein	N/A	624.655	900.905	1210.33	979.715	778.706	897.023	762.858	652.068	493.708	548.64
TGME49_304970	CDK-related protein kinase CRK1	CRK1	1049.62	690.282	928.552	922.148	1126.19	973.773	1690.24	7575.53	8387.22	1058.96
TGME49_218220	CDK-related protein kinase CRK2	CRK2	2655.63	2519.7	1726.61	1731.72	1566.53	1760.39	1212.68	426.899	913.56	1950.72
TGME49_249260	CDK-related protein kinase CRK3	CRK3	1084.93	319.957	780.574	731.431	816.14	710.319	642.163	22.832	12.2124	824.901
TGME49_256070	CDK-related protein kinase CRK4	CRK4	1003.57	681.136	948.52	867.901	751.273	823.848	1054.64	5104.82	8207.19	469.365
TGME49_229020	CDK-related protein kinase CRK5	CRK5	1092.44	913.559	1128.96	1118.83	1055.42	994.661	1269.49	533.742	342.867	240.593
TGME49_254630	CDK-related protein kinase CRK6	CRK6	1361.56	939.815	1446.93	1143.43	943.113	1127.42	1037.87	1369.21	1096.75	312.784
TGME49_257510	CDP-alcohol phosphatidyltransferase superfamily protein	N/A	2409.47	1497.47	1280.61	1224.33	1203.53	1196.59	1608.84	1546.66	1818.93	2111.33
TGME49_261760	CDP-alcohol phosphatidyltransferase superfamily protein	N/A	1442.78	953.682	1644.92	1163.44	1047.65	1239.69	1486.95	14943	31376.1	2568.5
TGME49_254540	CDP-alcohol phosphatidyltransferase superfamily protein	N/A	326.608	109.801	172.037	192.193	246.982	199.505	524.823	5227.68	4656.68	424.973
TGME49_203260	cell cycle checkpoint protein RAD17, putative	N/A	330.073	313.179	373.123	210.259	272.986	249.08	410.987	1391.93	1054.28	174.717
TGME49_221490	cell cycle regulator protein	N/A	290.819	366.803	802.963	833.288	637.912	812.279	646.114	6623.09	11447.3	455.882
TGME49_247380	cell division control protein CDC50, putative	N/A	320.058	118.997	276.25	365.94	359.623	287.813	287.386	421.256	246.973	511.78
TGME49_230820	cell division control protein CDC50.1	N/A	2608.73	3344.83	49.8273	61.6422	91.1956	172.834	423.139	1157.89	1309.65	4294.65
TGME49_232040	cell division control protein CDC50.2	N/A	151.497	8.24766	554.936	620.244	655.585	609.538	360.071	0.343258	1.08399	19.0943
TGME49_239540	cell division control protein CDC50.3	N/A	1093.8	1447.85	850.882	732.655	771.191	856.142	1005.07	2870.3	4265.45	378.189
TGME49_316620	cell division cycle protein CDC20, putative	CDC20	584.491	270.742	229.24	279.654	335.101	270.627	357.238	1213.03	1064.8	280.822
TGME49_230710	cell division protein CDC48	CDC48	223.285	192.735	543.908	384.419	367.93	378.183	180.333	0	0.890038	227.664
TGME49_321640	cell division protein CDC48AP	CDC48AP	539.795	364.191	508.173	361.451	334.926	334.944	263.53	41.2817	46.263	40.9922
TGME49_273090	cell division protein CDC48CY	CDC48CY	7541.99	3382.78	5060.74	5056.3	5490.85	4641.23	6708.12	5510.41	5270.77	536.636
TGME49_224480	cell-cycle-associated protein kinase CLK, putative	N/A	794.974	515.005	760.015	744.491	865.535	732.754	1252.42	9213.76	10684	407.064
TGME49_204280	cell-cycle-associated protein kinase DYRK1	DYRK1	1126	579.646	418.636	633.308	683.344	600.378	748.321	1201.59	876.578	729.948
TGME49_283480	cell-cycle-associated protein kinase DYRK2, putative	N/A	0	0	71.2605	129.696	339.985	591.511	1430.81	2125.51	4561.52	30.4964
TGME49_265330	cell-cycle-associated protein kinase GSK, putative	N/A	3633.94	5064.58	1880.58	1785.8	1697.91	2511.03	3899.05	28321.1	69548.7	6939.58
TGME49_266910	cell-cycle-associated protein kinase GSK, putative	N/A	370.005	2509.96	7.59566	16.5777	14.9529	25.6265	56.8807	46239.5	90483	2939.88
TGME49_253440	cell-cycle-associated protein kinase SRPK, putative	N/A	3945.22	2315.36	3198.14	3507.55	3826.58	3352.1	5094.44	15711.8	12566.4	3313.18
TGME49_281450	cell-cycle-associated protein kinase, putative	CRK8	727.217	470.5	561.886	519.4	440.965	491.965	421.424	290.669	240.495	101.384
TGME49_320430	cell-cycle-control protein (translation regulation), putative	N/A	846.545	512.255	1547.75	1248.29	1269.69	1278.36	1039.96	1141.14	519.8	1242.88
TGME49_247230	centrin 1	CEN1	760.914	1074.2	1274.36	1252.8	1079.48	1326.76	1692.93	218.437	209.99	428.189
TGME49_250340	centrin 2	CEN2	2325.68	2411	1640.81	1617.6	1524.52	1953.67	2187.71	8079.66	14577.4	2421.07
TGME49_260670	centrin 3	CEN3	953.608	542.964	613.063	586.334	557.863	548.479	744.668	3835.21	6059.97	1339.38
TGME49_237490	centrin family protein	N/A	15.4327	109.808	225.576	494.214	682.305	742.211	1648.2	115.857	85.2938	4.64518
TGME49_274000	centrin-binding protein SFI1	SFI1	666.132	264.133	283.738	294.783	423.274	286.245	503.204	2940.39	2121.81	211.781
TGME49_213040	centromere protein CENP-C	CENPC	604.772	218.763	459.175	459.966	499.319	454.876	537.198	230.649	317.008	433.764
TGME49_211430	centrosomal protein CEP110, putative	CEP110	18.6951	50.7324	87.1207	101.459	180.054	261.889	508.199	51.1643	83.5044	48.1406
TGME49_285210	centrosomal protein CEP120, putative	CEP120	785.814	557.285	473.986	426.195	421.349	401.096	467.272	729.866	527.449	280.099
TGME49_205590	centrosomal protein CEP131	CEP131	1.74609	22.1647	23.0924	53.6633	163.621	226.574	504.099	179.527	239.033	23.1005
TGME49_201790	centrosomal protein CEP170, putative	CEP170	725.446	1041.23	578.876	640.823	606.301	594.334	519.754	1723.03	1057.93	1551.24
TGME49_212880	centrosomal protein CEP250	CEP250	1216.34	547.165	674.552	549.475	805.894	739.56	1291.56	5449.56	7676.71	612.235
TGME49_290620	centrosomal protein CEP250L1	CEP250L1	1841.06	1103.47	1613.84	1027.43	1224.03	1255.97	1665.2	7767.52	10154.7	128.084
TGME49_313790	centrosomal protein CEP44, putative	CEP44	624.384	426.195	427.996	429.012	479.897	541.296	1280.3	16512.9	30870.1	446.101
TGME49_233940	centrosomal protein CEP72, putative	CEP72	0.621077	21.6121	34.3206	397.908	407.903	517.721	846.054	17.9722	22.8405	13.5885
TGME49_226610	centrosomal protein CEP76, putative	CEP76	10.4394	89.6532	136.437	250.39	292.424	359.773	612.344	75.3406	109.274	115.693
TGME49_246190	centrosome protein CEP530	CEP530	474.547	258.914	74.754	133.665	260.348	289.794	494.482	68.2043	55.1766	10.7659
TGME49_283710	ceramide synthase CERS1, putative	CERS1	3014.6	1050.41	1519.18	1327.66	1184.93	1254.24	1258.61	571.155	392.697	96.363
TGME49_316450	ceramide synthase CERS2, putative	CERS2	694.262	1087.72	1266.45	948.618	790.848	961.1	1373.04	16884.4	27417.1	1434.85
TGME49_500335	CFAP53 domain-containing protein	N/A	1.04084	3.04563	116.109	172.371	352.051	581.953	1058.15	11.8107	20.4442	2.46375
TGME49_500169	CFAP99 domain-containing protein	N/A	2.36692	67.4036	32.4474	76.8424	133.924	163.187	351.647	180.402	194.687	82.6189
TGME49_293170	CH domain-containing protein	N/A	1535.07	583.172	438.901	340.67	342.336	343.72	215.67	52.4566	387.216	138.644
TGME49_262140	chain a, pp2a-specific methylesterase apo form (pme), putative	N/A	1003.12	581.091	579.501	630.832	938.222	749.788	1344.41	1362.63	925.66	1930.47
TGME49_302000	chaperone clp, putative	N/A	1.39972	0	0	0	0.882262	1.06708	0.447293	0.821369	9.41316	1.41813
TGME49_257990	chaperone protein ClpB1	ClpB1	1692.7	2763.46	396.239	468.107	629.696	787.697	2769.26	1924.66	1392.48	2552.49
TGME49_268650	chaperone protein ClpB2	ClpB2	232.464	2772	636.01	615.965	569.201	719.784	873.861	5776	7035.29	2884.45
TGME49_275690	chaperone protein ClpB3	ClpB3	1576.48	2400.23	2168.17	1966.43	1618.34	1674.22	990.902	90.742	218.806	1346.53
TGME49_282200	chaperone protein ClpB4, putative	ClpB4	4.30146	4.96456	855.03	1804.38	2138.96	1797.2	601.683	6.5137	13.801	44.399
TGME49_202580	chaperone protein ClpB5, putative	ClpB5	650.772	13.7017	1767.45	1973.97	1881.66	1693.81	1060.98	348.57	357.914	743.851
TGME49_240600	chaperonin cpn60, putative	N/A	3231.25	4019.59	5480.31	4565.42	3293.85	4265.85	2332.26	7.78374	32.9107	23.816
TGME49_273960	chaperonin GroS protein	N/A	2179.81	1239.97	1531.92	1694.42	1383.08	1325	1092.51	3587.86	5252.58	3140.57
TGME49_311720	chaperonin protein BiP	N/A	28288.5	23621.1	38475.2	35155.3	31241.1	33376.2	36908.8	4324.88	4496.24	4857.58
TGME49_263530	chaperonin, putative	N/A	1625.84	1948.02	3571.41	3934.04	3288.19	3321.4	3083.41	50.6956	120.703	1321.16
TGME49_230150	ChAPs (Chs5p-Arf1p-binding proteins) protein	N/A	770.494	308.675	641.521	566.782	560.958	614.656	600.118	147.382	100.85	642.271
TGME49_213940	CHCH domain-containing protein	N/A	3276.6	3773.22	3776.72	5462.87	5286.89	4303.25	5080.72	31047.2	41914.5	5559.28
TGME49_206390	checkpoint protein HUS1, putative	N/A	304.713	1060.92	549.673	647.495	575.779	685.322	1110.63	16551	21025.3	1430.76
TGME49_293770	chitinase-like protein CLP1	CLP1	1912.76	2925.34	1160.35	1126.01	1418.12	1242.75	455.717	3325.92	4748.61	4835.77
TGME49_230590	chitobiosyldiphosphodolichol beta-mannosyltransferase	N/A	374.166	321.75	541.346	435.997	377.453	439.712	483.449	900.948	825.925	1753.12
TGME49_265500	chloride transporter, chloride channel (ClC) family protein	N/A	624.367	167.489	322.623	359.145	546.899	490.373	893.989	335.855	181.956	242.296
TGME49_290330	chloride transporter, chloride channel (ClC) family protein	N/A	228.776	328.546	335.839	392.182	414.509	382.903	265.543	1.05362	0	37.2007
TGME49_313930	chloroquine resistance transporter CRT	CRT	755.349	1211.8	322.031	404.837	499.329	501.893	1109.36	18817.2	30305.6	1493.4
TGME49_213840	choline transporter-like protein, putative	N/A	15.6393	103.338	92.4893	182.663	347.188	388.621	807.96	211.624	211.448	55.9405
TGME49_216930	cholinephosphate cytidylyltransferase	N/A	856.573	1266	1923.66	2022.04	1417.57	1726.34	2106.15	14170.9	19018.2	2505.64
TGME49_320040	CHORD protein	N/A	220.487	731.912	741.601	658.848	435.566	591.698	395.705	357.978	717.141	243.632
TGME49_201380	chorismate synthase, putative	N/A	2757.31	1717.52	714.519	877.974	811.617	717.051	604.516	16.8366	22.3986	852.19
TGME49_269760	'chromo' (CHRromatin Organization MOdifier) domain-containing protein	N/A	206.288	58.1033	123.261	111.884	187.255	132.639	327.344	2777.55	2773.18	129.713
TGME49_500193	chromo domain-containing protein	N/A	1627.97	1787.28	913.837	867.136	817.953	794.277	1233.93	2388.11	1845.19	1287.67
TGME49_258240	chromodomain helicase DNA binding protein CHD1/SWI2/SNF2	N/A	2469.51	1879.61	2396.43	2074.91	2176.29	2320.28	2109.58	2545.86	1841.02	2248.57
TGME49_218210	Chromosome-associated kinesin KLP1, putative	N/A	17.1569	55.9934	308.278	520.001	744.199	937.013	1934.24	46.3574	88.1285	10.1267
TGME49_221420	Chromosome-associated kinesin KLP1, putative	N/A	5.49823	121.289	60.0585	56.966	175.327	264.67	605.112	87.1389	207.971	26.5812
TGME49_230440	CHY zinc finger domain-containing protein	N/A	583.309	898.525	593.344	634.381	655.758	721.106	1338.82	21346.9	42769.2	4467.88
TGME49_306040	CHY zinc finger protein	N/A	1030.72	986.078	530.203	554.102	547.065	488.092	516.474	768.241	440.505	2970.06
TGME49_278710	cilia- and flagella-associated protein 221, putative	N/A	0	9.27636	34.7674	46.3565	77.3982	122.226	251.453	362.748	569.425	20.611
TGME49_500380	cilia- and flagella-associated protein 46, putative	N/A	16.0159	177.06	41.4729	97.0952	239.85	272.012	631.503	835.531	1112.98	109.35
TGME49_500168	cilia- and flagella-associated protein 54, putative	N/A	58.6605	280.652	61.6286	97.0113	250.489	214.093	575.74	230.445	250.869	68.6445
TGME49_500385	cilia- and flagella-associated protein 58, putative	N/A	129.842	131.246	334.949	247.878	330.159	374.31	614.207	214.802	252.625	51.0148
TGME49_500383	cilia- and flagella-associated protein 61, putative	N/A	8.24098	151.879	53.3128	223.862	412.503	478.439	986.28	2160.46	6133.72	132.428
TGME49_500079	cilia- and flagella-associated protein 69, putative	N/A	1.48553	3.04563	40.5873	130.802	179.797	183.482	398.612	60.7003	59.7411	1.28431
TGME49_268890	citrate synthase I	N/A	1084.98	841.049	1501.95	1903.22	1905.27	1634.98	2337.25	481.465	373.835	918.908
TGME49_263130	citrate synthase, putative	N/A	3109.23	2131	114.427	272.649	597.856	780.586	5559.55	24416.6	46885	747.468
TGME49_203110	citrate synthase, putative	N/A	34.0273	5.86304	314.619	457.16	663.983	837.478	2926.04	5654.03	8852.34	296.94
TGME49_268810	ck2 beta subunit	N/A	1583.26	974.892	1791.58	1687.94	1439.4	1558.58	1196.66	17.4199	9.28836	2211.63
TGME49_241130	CKK domain-containing protein	N/A	42.5238	785.123	51.7858	83.8715	184.085	211.595	492.544	48.7682	159.549	23.3045
TGME49_212270	CLAMP-linked invasion protein CLIP	CLIP	4726.07	6554.3	30.3043	5.35616	7.62684	8.99724	9.61679	19.4679	101.366	52477.6
TGME49_312590	CLASP domain-containing protein	N/A	823.735	382.526	294.875	453.516	593.904	507.293	1082.9	2073.78	1635.82	157.723
TGME49_221260	Class-II DAHP synthetase family protein	N/A	413.345	334.845	1506.08	1297.52	997.327	948.474	589.532	501.94	436.755	198.11
TGME49_280550	clathrin adaptor complex small chain subfamily protein	N/A	752.429	497.555	1571.13	1126.17	1034.03	1062.88	1219.92	182.35	143.891	1391.92
TGME49_290950	clathrin heavy chain	CHC1	2820.03	2203	3217.37	2752.14	2988.71	2796.36	3125.53	11028.4	13406.9	765.755
TGME49_213030	clathrin light chain, putative	N/A	2242.28	1777.53	2088.91	2227.49	2184.88	2042.81	3572.6	2983.03	4472.04	809.016
TGME49_265790	claudin-like apicomplexan microneme protein	CLAMP	4336.4	3615.18	270.729	446.491	537.279	398.343	185.999	615.493	979.87	47524.1
TGME49_285200	cleavage and polyadenylation specificity factor subunit 3	CPSF3	324.777	370.948	561.943	624.549	590.557	607.079	479.423	840.544	733.752	479.52
TGME49_201200	cleavage and polyadenylation specificity factor subunit 4	CPSF4	454.232	602.32	321.584	413.912	400.916	387.006	525.42	3832.46	4294.21	712.433
TGME49_313590	CLEC16A domain-containing protein	N/A	506.11	356.868	371.205	265.454	292.666	291.894	357.238	1079.24	497.645	1292.25
TGME49_299110	cleft lip and palate transmembrane protein 1 (clptm1) protein	N/A	1360.77	497.406	1157.78	940.248	795.066	925.459	1033.84	816.888	465.937	320.145
TGME49_205240	cleft lip and palate transmembrane protein 1 (clptm1) protein	N/A	1305.22	773.756	1903.74	1752.58	1585.44	1583.99	1602.28	958.481	915.861	1073.81
TGME49_298010	CLU domain-containing protein	N/A	2492.14	2147.19	168.147	338.311	339.615	342.63	195.392	910.9	1074.95	311.484
TGME49_321360	clustered-asparagine-rich protein	N/A	436.711	393.445	791.834	670.867	535.149	568.474	274.861	104.738	252.94	1118.76
TGME49_293850	clusterin-associated protein 1, putative	N/A	3.53775	7.14311	7.84099	27.6421	69.2863	94.7929	234.53	13.4752	22.7412	1433.97
TGME49_253580	CMGC kinase, CDK family	N/A	1.68561	37.2363	191.627	319.515	568.857	1187.31	5123.29	44793.9	27160.2	897.212
TGME49_263070	CMGC kinase, CK2 family	N/A	1647.87	1026.61	2091.05	1927.14	1764.62	1679.51	1331.22	67.9516	60.935	474.108
TGME49_307640	CMGC kinase, CK2 family	N/A	2.30408	1.2004	1220.93	2302.87	3591.19	4679.15	15818.2	15696.4	10989	644.026
TGME49_312570	CMGC kinase, MAPK family (ERK) MAPK-1	MAPKL1	2523.45	1304.72	762.475	805.788	913.554	935.836	3135.82	35625.3	52500.4	483.52
TGME49_221550	CMGC kinase, MAPK family, MEK kinase-related (incomplete catalytic triad)	N/A	320.167	6156.77	222.639	291.064	598.372	813.507	3213.13	41893.7	88320.9	6088.12
TGME49_250850	CMGC kinase, putative	N/A	1046.86	551.497	518.249	781.971	965.679	791.803	901.891	92.6707	73.1854	163.843
TGME49_259570	CMP/dCMP deaminase, zinc-binding, putative	N/A	163.425	378.786	350.081	329.536	229.969	272.787	169.748	2310.72	2989.52	1092.67
TGME49_305220	C-Myc-binding family protein	N/A	0.170556	0	69.3175	137.775	230.997	306.055	657.744	11.905	14.5311	1.09679
TGME49_500054	c-Myc-binding protein, putative	N/A	19.9132	43.7997	26.5451	69.8909	116.527	181.747	362.456	70.2335	66.9259	336.061
TGME49_244390	coatomer epsilon subunit protein	N/A	1754.29	3054.65	1797.23	1706.09	1478.15	1775.09	2052.63	7713.28	10157.8	2297.04
TGME49_273370	coatomer gamma 2-subunit protein, putative	N/A	1253.48	920.184	1353.77	1283.1	1282.43	1252.81	1825.55	3285.16	4598.44	398.801
TGME49_240650	coatomer protein complex, subunit alpha, putative	N/A	3105.01	1852.48	3715.35	3122.16	3141.45	3060.78	4010.28	461.637	384.321	1312.21
TGME49_273990	CobW/P47K family protein	N/A	141.365	8.24766	156.673	204.72	201.316	181.467	239.376	160.283	69.4744	167.039
TGME49_265220	co-chaperone GrpE protein	N/A	718.922	709.092	1374	2021.76	1554.13	1525.98	928.952	91.2786	71.3338	1163.33
TGME49_249480	co-chaperone UNC	UNC	899.989	394.477	350.633	488.485	531.052	442.778	978.378	9709.17	4316.07	350.403
TGME49_275980	coenzyme q (ubiquinone) biosynthesis protein coq4 protein	N/A	367.802	360.994	190.724	284.729	259.312	264.102	255.404	60.7932	31.8167	777.545
TGME49_243910	Cof family hydrolase subfamily protein	N/A	938.789	1534.06	1238.21	1091.8	785.29	1022.16	774.785	6331.33	8870.07	649.015
TGME49_229320	Cof family hydrolase subfamily protein	N/A	9.32236	3.90415	268.84	741.042	1050.41	2203.89	9273.27	149791	65865.6	3045.4
TGME49_229330	Cof family hydrolase subfamily protein	N/A	7.06852	3.04563	0.45062	34.9002	51.9908	45.6432	43.2383	340.612	5215.11	4370.27
TGME49_237260	Coiled-coil domain containing 124 family protein	N/A	952.77	699.392	868.945	801.559	777.312	733.889	840.463	2213.95	2776.22	3347.96
TGME49_220170	coiled-coil domain-containing protein	N/A	355.897	847.854	574.215	499.451	396.896	434.286	202.325	35.0008	26.3395	2374.69
TGME49_209630	coiled-coil domain-containing protein	N/A	202.529	213.546	209.189	274.48	244.783	237.674	201.654	559.972	334.482	795.163
TGME49_233850	coiled-coil domain-containing protein	N/A	117.349	188.059	470.405	451.595	317.489	344.451	204.636	5.81362	12.7151	664.077
TGME49_213700	coiled-coil domain-containing protein	N/A	14.7173	301.831	42.2683	81.5088	155.384	215.01	544.206	19.6512	13.8349	7.05276
TGME49_500206	coiled-coil domain-containing protein	N/A	4.15777	204.108	38.2968	73.2325	182.654	311.992	675.934	1717.52	2053.86	84.9681
TGME49_292935	coiled-coil domain-containing protein	N/A	0.438372	23.7508	60.1082	91.84	194.769	347.154	672.057	2157.73	1300.3	218.54
TGME49_500211	coiled-coil domain-containing protein 103, putative	N/A	0.228793	0	101.563	291.315	290.637	386.727	782.091	61.6466	331.933	66.8816
TGME49_282030	coiled-coil domain-containing protein 151, putative	N/A	1.94386	2.53912	28.0568	45.2894	119.329	164.191	429.848	4020.3	5743.05	187.308
TGME49_285770	coiled-coil domain-containing protein 189, putative	N/A	3.85766	63.1296	7.84099	54.8573	71.6655	109.657	260.101	4.94451	7.95416	196.328
TGME49_500270	coiled-coil domain-containing protein 39, putative	N/A	479.372	210.658	221.085	159.861	285.784	312.487	580.139	11.8238	18.936	347.04
TGME49_243560	coiled-coil domain-containing protein 81, putative	N/A	0.452792	0	22.3641	41.0289	85.3044	194.975	356.94	67.5617	145.145	197.087
TGME49_500070	coiled-coil domain-containing protein, putative	N/A	0	0	30.3637	57.6837	105.956	198.401	420.455	2.83397	8.65815	3.49758
TGME49_320600	cold-shock DNA-binding domain-containing protein	N/A	4699.85	10999.2	16573.4	17881.3	12490.9	13275.3	7506.69	307.626	488.735	4565.04
TGME49_267470	cold-shock DNA-binding domain-containing protein	N/A	46.3214	734.591	3106.97	4129.97	5964.94	7020.98	20876.2	152985	120867	12301.2
TGME49_322700	collagen, putative	N/A	2.57048	4.28133	10.5095	25.6267	67.875	106.061	147.756	0	0.454075	0
TGME49_288930	condensin complex subunit 2, putative	N/A	1042.89	553.228	470.951	407.182	404.836	351.524	662.217	2956.18	1751.29	491.635
TGME49_212940	condensin-2 complex subunit H2, putative	N/A	256.038	83.3807	199.681	183.333	174.686	153.251	207.767	234.798	111.256	209.033
TGME49_210810	conoid associated protein CAP1	CAP1	1190.18	6550.78	1228.99	1284.27	1100.13	1484.25	1430.67	13487.7	10497.1	2679.79
TGME49_240380	conoid gliding protein CGP	CGP	3297.03	2519.34	890.218	620.208	604.123	666.511	358.281	64.023	933.718	1750.85
TGME49_266630	conoid protein hub CPH1	CPH1	1416.94	1354.14	395.573	670.406	646.518	579.894	290.517	379.43	792.706	1687.59
TGME49_267500	conserved basal apical peripheral protein CBAP	CBAP	3232.32	4252.23	742.961	1211.54	1084.86	916.442	473.236	333.371	1582.47	2606.2
TGME49_290310	conserved oligomeric Golgi complex subunit 1	COG1	365.219	206.024	299.844	347.03	377.136	363.474	560.83	512.551	216.399	101.44
TGME49_273580	conserved oligomeric Golgi complex subunit 2	COG2	468.643	579.972	499.103	478.642	437.734	432.124	510.063	647.023	348.757	367.373
TGME49_306410	conserved oligomeric Golgi complex subunit 3	COG3	419.395	284.646	338.114	287.653	281.793	274.831	341.881	567.295	460.066	299.842
TGME49_212150	conserved oligomeric Golgi complex subunit 4	COG4	784.61	547.238	414.54	416.732	402.848	402.595	519.754	215.278	266.791	228.645
TGME49_251730	conserved oligomeric Golgi complex subunit 5	COG5	562.657	384.569	782.465	560.753	546.615	595.041	639.852	75.0342	28.343	60.8792
TGME49_224150	conserved oligomeric Golgi complex subunit 6	COG6	203.178	120.964	185.035	199.962	206.601	184.01	221.037	126.175	113.882	57.9667
TGME49_242030	conserved oligomeric Golgi complex subunit 7	COG7	474.973	193.978	263.447	311.603	332.074	265.473	303.264	125.919	64.4685	134.644
TGME49_240540	conserved oligomeric Golgi complex subunit 8	COG8	1447.48	2203.66	960.217	1065.55	817.594	1014.6	901.295	2416.17	3604.48	1810.01
TGME49_225450	COP9 signalosome complex subunit 3, putative	N/A	384.64	370.948	533.123	319.309	280.329	325.769	285.596	2465.92	4623.67	244.611
TGME49_231110	COPI associated protein	N/A	0.688493	2.53912	158.898	389.289	568.693	901.957	2943.63	40508.4	52779.2	831.335
TGME49_260500	COPI associated protein, putative	N/A	6062.48	4710.28	4590.26	4825.71	4014.85	4323.37	3764.04	6381.24	10467	546.174
TGME49_235020	COPI protein, putative	N/A	2416.87	1208.56	3237.71	2567.31	2669.69	2698.44	3659.52	1625.82	1338.87	883.523
TGME49_500391	copper amine oxidase, putative	N/A	8.33509	0	5682.14	10789.4	18710.6	18729.3	69961.8	838.494	587.79	35.7777
[truncated: 7,048 more rows]

## Sheet: 1.3
ToxoDB ID Release 68	Product Description	Gene Name	Tachyzoites	Bradyzoites	EES1	EES2	EES3	EES4	EES5	Unsporulated oocysts	Sporulating oocysts	Sporulated oocysts
[truncated: 7,989 more rows]

[truncated: 1 more sheets: 1.4]
