# Supplementary material for: Genome-wide Transcriptomic Analysis of Toxoplasma gondii Reveals Stage-specific Regulatory Programs and Metabolic Adaptations Driving Oocyst Sporulation
Source: bioRxiv preprint, doi:10.1101/2025.09.10.674405, version 1 (2025-09-11)
Supplement: Supplemental Table 2 [file 674405_file21.xlsx]

## Sheet: Contents
	Analysis of differential expression
2.1	Number of up- and downreulated genes depending on LFC and p-values (raw and adjusted)
2.2	Sporulating versus unsporulated: LFCs (log2 fold changes), p-values, adjusted p-values and log2 values of the normalized counts +1
2.3	Sporulated versus unsporulated: LFCs (log2 fold changes), p-values, adjusted p-values and log2 values of the normalized counts +1
2.4	Sporulated versus sporulating: LFCs (log2 fold changes), p-values, adjusted p-values and log2 values of the normalized counts +1
2.5	Unsporulated versus others: LFCs (log2 fold changes), p-values, adjusted p-values and log2 values of the normalized counts +1
2.6	Sporulating versus others: LFCs (log2 fold changes), p-values, adjusted p-values and log2 values of the normalized counts +1
2.7	Sporulated versus others: LFCs (log2 fold changes), p-values, adjusted p-values and log2 values of the normalized counts +1

## Sheet: 2.1
Sporulating vs unsporulated: down/up	LFC ≥ 1.0	LFC ≥ 1.5	LFC ≥ 2.0	LFC ≥ 2.5	LFC ≥ 3.0
rawP_max_0.01	430 / 916	123 / 639	34 / 500	15 / 406	12 / 303
rawP_max_0.001	198 / 690	75 / 497	17 / 395	5 / 322	4 / 239
adjP_max_0.05	437 / 924	123 / 644	34 / 502	15 / 407	12 / 304
adjP_max_0.01	211 / 715	78 / 513	18 / 403	6 / 326	5 / 241
Sporulated vs unsporulated: down/up	LFC ≥ 1.0	LFC ≥ 1.5	LFC ≥ 2.0	LFC ≥ 2.5	LFC ≥ 3.0
rawP_max_0.01	2608 / 2893	2301 / 2598	1955 / 2323	1641 / 2033	1359 / 1800
rawP_max_0.001	2438 / 2619	2224 / 2433	1914 / 2208	1616 / 1944	1341 / 1721
adjP_max_0.05	2694 / 3044	2343 / 2685	1983 / 2389	1662 / 2085	1377 / 1846
adjP_max_0.01	2578 / 2847	2286 / 2570	1943 / 2303	1633 / 2019	1352 / 1787
Sporulated vs sporulating: down/up	LFC ≥ 1.0	LFC ≥ 1.5	LFC ≥ 2.0	LFC ≥ 2.5	LFC ≥ 3.0
rawP_max_0.01	2632 / 2877	2366 / 2619	2056 / 2295	1728 / 1953	1419 / 1677
rawP_max_0.001	2455 / 2645	2265 / 2479	1991 / 2209	1688 / 1893	1389 / 1628
adjP_max_0.05	2743 / 3007	2425 / 2700	2093 / 2353	1755 / 2005	1441 / 1720
adjP_max_0.01	2600 / 2840	2350 / 2598	2045 / 2283	1720 / 1943	1414 / 1669
Unsporulated vs others: down/up	LFC ≥ 1.0	LFC ≥ 1.5	LFC ≥ 2.0	LFC ≥ 2.5	LFC ≥ 3.0
rawP_max_0.01	2099 / 1915	1756 / 1376	1425 / 919	1111 / 432	826 / 122
rawP_max_0.001	1845 / 1785	1571 / 1335	1303 / 901	1026 / 418	762 / 113
adjP_max_0.05	2237 / 1982	1849 / 1404	1493 / 933	1167 / 438	871 / 126
adjP_max_0.01	2034 / 1885	1703 / 1364	1392 / 914	1085 / 428	805 / 119
Sporulating vs others: down/up	LFC ≥ 1.0	LFC ≥ 1.5	LFC ≥ 2.0	LFC ≥ 2.5	LFC ≥ 3.0
rawP_max_0.01	2055 / 2082	1566 / 1600	1112 / 1137	732 / 789	469 / 522
rawP_max_0.001	1801 / 1914	1457 / 1503	1048 / 1087	681 / 759	426 / 502
adjP_max_0.05	2166 / 2186	1626 / 1654	1151 / 1168	765 / 812	486 / 533
adjP_max_0.01	1992 / 2039	1535 / 1572	1095 / 1123	719 / 782	460 / 519
Sporulated vs others: down/up	LFC ≥ 1.0	LFC ≥ 1.5	LFC ≥ 2.0	LFC ≥ 2.5	LFC ≥ 3.0
rawP_max_0.01	2643 / 2995	2337 / 2670	1988 / 2332	1673 / 2031	1365 / 1755
rawP_max_0.001	2509 / 2791	2272 / 2545	1946 / 2247	1646 / 1957	1345 / 1692
adjP_max_0.05	2719 / 3101	2379 / 2739	2007 / 2382	1687 / 2073	1376 / 1791
adjP_max_0.01	2626 / 2961	2328 / 2645	1983 / 2317	1669 / 2016	1361 / 1742

## Sheet: 2.2
ToxoDB ID Release 68	Product description	Gene name	LFC	p-value	Adjusted p-value	Unsporulated oocysts Sample 1	Unsporulated oocysts Sample 2	Sporulating oocysts Sample 1	Sporulating oocysts Sample 2	Sporulated oocysts Sample 1	Sporulated oocysts Sample 2
TGME49_200010	dense granule protein GRA20	GRA20	0.43	0.363	0.552	5.3564	4.46742	5.42278	5.30391	12.3929	12.8133
TGME49_200110	hypothetical protein	N/A	0	1	NA	0	0	0	0	4.23386	3.79764
TGME49_200130	Toxoplasma gondii family C protein	N/A	1.81	0.3	0.486	1.27942	0	2.30094	0	8.3272	8.33349
TGME49_200230	microneme protein MIC17C	MIC17C	3.04	0.125	0.271	4.3912	0	4.61863	7.1352	11.6871	11.8263
TGME49_200240	microneme protein MIC17B	MIC17B	2.51	0.0728	0.189	4.88499	2.59194	4.17156	7.44514	12.0882	12.178
TGME49_200250	microneme protein MIC17A	MIC17A	0.25	0.495	0.674	11.375	12.0469	11.7669	12.198	11.0882	11.2509
TGME49_200260	hypothetical protein	N/A	0.52	0.178	0.345	7.88583	7.77652	8.0309	8.62226	9.53453	9.7622
TGME49_200270	PAN/Apple domain-containing protein	N/A	0.59	0.0502	0.146	10.2064	10.3801	10.6209	11.1036	12.348	12.364
TGME49_200280	WD domain, G-beta repeat-containing protein	N/A	-0.35	0.374	0.564	12.1741	11.9168	12.0725	11.1953	11.8173	11.465
TGME49_200290	rhomboid protease ROM1	ROM1	0.99	0.00141	0.0109	8.77408	9.05275	9.74138	10.0648	14.5325	14.8879
TGME49_200310	hypothetical protein	N/A	1.59	0.0146	0.0625	5.82448	6.63764	7.31669	8.3303	6.32008	7.07575
TGME49_200320	hypoxanthine-xanthine-guanine phosphoribosyl transferase HXGPRT	HXGPRT	-0.23	0.707	0.834	6.8479	6.99699	6.77701	6.60375	5.88332	6.87226
TGME49_200330	basal complex component BCC9	BCC9	2.62	8.14e-08	8.91e-06	4.18022	3.32946	6.26561	6.34368	12.2513	12.6799
TGME49_200340	hypothetical protein	N/A	0.06	0.882	0.942	6.5291	6.11677	6.33744	6.4534	10.5	9.93937
TGME49_200350	subtilisin SUB3	SUB3	0.85	0.000333	0.00356	15.6256	15.5238	16.3566	16.4931	14.4595	14.6585
TGME49_200360	hypothetical protein	N/A	1.25	0.0754	0.194	3.93301	4.17783	3.67619	6.02619	15.1833	15.6151
TGME49_200370	protein farnesyltransferase subunit beta, putative	N/A	0.43	0.112	0.253	11.9583	11.6125	12.2176	12.2416	10.9088	11.113
TGME49_200385	bradyzoite-formation deficient protein BFD1	BFD1	1.61	5.57e-05	0.000925	8.913	8.60826	9.85791	10.7596	12.2636	12.2386
TGME49_200400	serine/threonine-protein phosphatase PP2A regulatory subunit PR48	PR48	0.12	0.709	0.835	12.904	12.6841	12.6813	13.1248	11.8567	11.4125
TGME49_200410	hypothetical protein	N/A	-0.69	0.194	0.365	7.93715	8.26101	6.68821	7.91676	9.99226	9.50894
TGME49_200430	cytidine and deoxycytidylate deaminase zinc-binding region domain-containing protein	N/A	0.11	0.739	0.856	9.02	9.27045	9.29794	9.21965	6.65488	6.84553
TGME49_200440	hypothetical protein	N/A	-1.36	0.00038	0.00394	10.0597	9.79463	8.85539	8.21819	10.9741	10.5317
TGME49_200450	hypothetical protein	N/A	0.27	0.374	0.564	10.7479	10.6313	10.7228	11.1654	11.8515	11.5961
TGME49_200460	hypothetical protein	N/A	0.81	0.0896	0.217	10.3138	11.067	10.8804	11.9906	11.8173	12.0151
TGME49_200470	hypothetical protein	N/A	0.15	0.796	0.893	4.65912	6.53184	5.99649	6.09552	12.8231	12.8802
TGME49_200480	Toxoplasma gondii family B protein	N/A	-1.25	0.387	0.575	4.0619	4.17783	3.52031	2.07335	2.19002	2.67299
TGME49_200590	Toxoplasma gondii family C protein	N/A	-0.84	0.229	0.407	3.79146	4.25586	2.91577	3.61237	8.94161	8.73593
TGME49_200595	hypothetical protein	N/A	0.99	0.329	0.518	5.54464	5.86621	5.50827	7.33477	0	0
TGME49_200600	hypothetical protein	N/A	-0.02	0.952	0.98	10.6397	10.4729	10.852	10.1324	3.83131	3.74074
TGME49_200700	Toxoplasma gondii family C protein	N/A	3.16	0.515	NA	0	0	2.30094	0	4.15361	0
TGME49_201100	hypothetical protein	N/A	-0.74	0.262	0.445	9.18476	8.77654	8.79714	7.36317	5.75322	4.55983
TGME49_201110	hypothetical protein	N/A	-0.18	0.627	0.777	7.59768	7.76322	7.7265	7.23075	10.578	10.9948
TGME49_201120	ELMO/CED-12 family protein	N/A	-1.42	0.00104	0.00863	13.3937	13.2244	12.0973	11.646	9.88529	8.82245
TGME49_201130	rhoptry kinase family protein ROP33	ROP33	-0.19	0.781	0.882	7.44059	9.04453	7.18009	8.87978	12.0974	11.7337
TGME49_201140	hypothetical protein	N/A	-0.83	0.00952	0.0462	12.9583	13.0383	12.3841	11.9117	11.4248	10.991
TGME49_201150	heavy metal translocating P-type ATPase subfamily protein	N/A	0.95	0.326	0.515	2.40114	3.59264	3.94503	4.09112	7.30639	6.3033
TGME49_201160	hypothetical protein	N/A	-0.83	0.8	NA	2.74623	0	0	2.07335	2.48056	2.25225
TGME49_201170	hypothetical protein	N/A	3.45	0.00465	0.0272	10.0693	6.68071	11.9556	13.11	12.2543	12.4594
TGME49_201180	megakaryocyte stimulating factor MSF	MSF	-0.39	0.381	0.569	8.41245	8.06904	7.81303	7.89747	5.93225	6.54679
TGME49_201200	cleavage and polyadenylation specificity factor subunit 4	CPSF4	-0.05	0.9	0.952	13.0283	12.4036	13.0591	12.2141	10.6669	10.7542
TGME49_201210	hypothetical protein	N/A	-0.75	0.34	0.529	3.45836	4.86606	3.52031	3.7902	8.38106	8.00243
TGME49_201220	preconoidal ring protein PCR4	PCR4	0.64	0.0616	0.168	12.1639	11.9089	12.5096	12.8392	7.93257	7.31378
TGME49_201230	kinesin motor domain-containing protein	N/A	-0.53	0.349	0.539	8.52295	7.76988	7.83801	7.47147	7.23993	6.3033
TGME49_201240	hypothetical protein	N/A	-0.02	0.941	0.974	16.7922	16.7964	16.889	16.643	11.0585	10.437
TGME49_201250	histone lysine methyltransferase, SET, putative	N/A	-1.01	0.0204	0.08	11.1961	10.582	10.2908	9.38801	9.19566	9.20022
TGME49_201260	sugar transporter ST3	ST3	0.78	0.0197	0.0778	12.628	13.2097	13.5222	13.9003	14.3379	14.4879
TGME49_201270	hypothetical protein	N/A	4.85	0.065	0.174	0	0	0	3.7902	5.17481	5.35027
TGME49_201380	chorismate synthase, putative	N/A	0.22	0.674	0.813	4.81356	5.05251	4.61863	5.57062	11.2319	10.7058
TGME49_201390	hypothetical protein	N/A	0.18	0.704	0.833	11.5111	12.4785	11.7804	12.6148	15.4591	15.9352
TGME49_201400	Sin3-associated polypeptide SAP18	SAP18	-0.05	0.856	0.927	13.7752	13.583	13.7697	13.488	12.5504	12.3889
TGME49_201520	protein phosphatase PPM3G, putative	N/A	0.21	0.663	0.805	6.65705	7.60824	7.70855	7.06779	10.3094	10.1629
TGME49_201630	protein phosphatase PPM3H, putative	N/A	1.26	0.0086	0.043	7.55451	7.17824	8.11506	9.00669	8.08368	8.05004
TGME49_201660	hypothetical protein	N/A	-0.19	0.515	0.69	11.6399	11.7695	11.6918	11.3064	6.80691	6.51321
TGME49_201670	DnaJ domain-containing protein	N/A	-0.44	0.18	0.348	9.11219	8.65221	8.32988	8.58658	11.6542	11.4868
TGME49_201680	eukaryotic initiation factor-3 subunit 10, putative	N/A	-0.99	0.0102	0.0486	6.90056	6.46771	5.87301	5.52107	11.0335	11.0635
TGME49_201690	BT1 family protein	N/A	-0.3	0.613	0.766	5.78768	7.39203	5.99649	6.90351	12.2697	12.3471
TGME49_201700	protein transport protein SEC13	N/A	-0.45	0.309	0.496	9.30032	8.70184	8.85131	8.24132	5.46814	5.56214
TGME49_201710	WD domain, G-beta repeat-containing protein	N/A	-0.05	0.878	0.94	11.2896	11.3714	11.4096	11.1522	9.56297	9.95587
TGME49_201720	alpha N-terminal protein methyltransferase NTM1	N/A	-0.55	0.398	0.586	8.01881	7.10634	7.63444	6.19365	8.50953	8.30679
TGME49_201730	hypothetical protein	N/A	3.97	0.000702	0.00633	2.40114	0	3.81687	5.57062	8.47073	9.29466
TGME49_201740	hypothetical protein	N/A	3.95	0.0299	0.104	4.3912	0	6.36061	7.81765	11.4977	11.9426
TGME49_201750	Tctex-1 family protein	N/A	0.42	0.517	0.691	8.58861	10.065	9.1824	10.4211	4.15361	4.68575
TGME49_201760	thioredoxin-like associated protein TLAP4	TLAP4	0.28	0.547	0.716	10.556	11.5744	10.9986	11.7718	10.7022	10.8136
TGME49_201770	cullin 3, putative	N/A	0.09	0.723	0.846	14.9204	14.7192	14.7538	15.061	10.6224	10.6236
TGME49_201775	hypothetical protein	N/A	0	1	NA	0	0	0	0	3.60862	3.26364
TGME49_201780	microneme protein MIC2	MIC2	1.72	0.0511	0.148	3.45836	1.00419	2.64086	4.90099	16.9492	16.7505
TGME49_201785	hypothetical protein	N/A	0.28	0.69	0.825	4.95306	6.00824	5.33191	6.25555	8.12109	9.27351
TGME49_201790	centrosomal protein CEP170, putative	CEP170	-0.9	0.0209	0.0807	11.7166	11.4092	11.0315	10.2008	11.6947	11.9707
TGME49_201800	ATP synthase-associated protein	N/A	0.66	0.0451	0.135	9.77243	10.0998	10.325	10.8476	10.9528	10.8452
TGME49_201810	hypothetical protein	N/A	0.8	0.348	0.538	5.63028	3.9147	6.02578	5.46977	6.69796	6.40751
TGME49_201820	hypothetical protein	N/A	-0.92	0.117	0.259	4.81356	5.05251	4.27274	3.7902	8.77894	8.61054
TGME49_201830	ribosomal protein L37	N/A	0.52	0.0209	0.0807	12.4425	12.5077	13.0308	12.9577	9.45411	9.37046
TGME49_201840	aspartyl protease ASP1	ASP1	0.12	0.57	0.734	18.0193	18.03	18.1715	18.1173	14.0949	14.0459
TGME49_201850	WD domain, G-beta repeat-containing protein	N/A	0.32	0.311	0.497	15.8118	16.2027	16.3395	16.3392	13.3947	13.8934
TGME49_201860	hypothetical protein	N/A	0.36	0.269	0.452	13.0957	13.3259	13.2377	13.8459	12.7642	12.9069
TGME49_201870	tetratricopeptide repeat-containing protein	N/A	-0.47	0.145	0.3	10.887	10.806	10.4878	10.2662	11.3187	11.8601
TGME49_201880	cytochrome b-c1 complex subunit 9	QCR9	-0.39	0.234	0.412	11.6819	12.1283	11.7324	11.2945	11.543	11.7884
TGME49_201900	hypothetical protein	N/A	0.19	0.431	0.617	12.1312	12.3382	12.3645	12.4884	11.4635	11.4548
TGME49_202010	hypothetical protein	N/A	0.22	0.578	0.74	13.4659	13.6417	13.5002	14.0099	7.73991	6.87887
TGME49_202020	DnAK-TPR	N/A	2.92	5.26e-16	4.14e-12	4.65912	4.86606	7.60563	7.68896	15.1482	15.4098
TGME49_202040	hypothetical protein	N/A	0.47	0.167	0.331	8.78813	9.30068	9.36822	9.68933	10.6326	10.493
TGME49_202050	hypothetical protein	N/A	0.15	0.871	0.936	4.3912	6.00824	4.83261	5.99023	5.68349	6.57147
TGME49_202065	hypothetical protein	N/A	-0.46	0.545	0.715	4.81356	4.91498	4.17156	4.64758	6.1547	6.38911
TGME49_202070	hypothetical protein	N/A	-0.83	0.0356	0.117	10.5642	10.4082	9.48879	9.82054	9.60129	8.82073
TGME49_202080	hypothetical protein	N/A	-1.17	0.0114	0.0525	6.57302	6.05264	5.18389	5.18169	10.4282	9.97758
TGME49_202090	hypothetical protein	N/A	-0.73	0.0862	0.211	19.0498	19.375	18.8811	17.9621	14.0764	13.4753
TGME49_202100	hypothetical protein	N/A	0.1	0.729	0.849	20.9375	21.4576	21.2841	21.3645	16.1027	15.8917
TGME49_202110	hypothetical protein	N/A	0.34	0.217	0.393	21.5651	21.8376	22.0393	22.0649	16.7104	16.3189
TGME49_202120	PH domain-containing protein	ICAP16	-0.61	0.0535	0.152	10.1959	9.93169	9.67129	9.21965	12.7262	12.4868
TGME49_202140	enoyl-CoA hydratase/isomerase family protein	N/A	-0.3	0.265	0.448	11.3035	11.2402	11.0759	10.8701	9.35666	9.58263
TGME49_202160	ABC1 family protein	N/A	-0.8	0.0635	0.172	9.01205	9.42832	8.78862	7.96387	10.3403	10.02
TGME49_202170	hypothetical protein	N/A	1.8	0.318	0.506	3.0245	1.00419	4.83261	0	6.14436	5.9234
TGME49_202180	hypothetical protein	N/A	-0.72	0.0509	0.147	7.54352	7.47593	6.95502	6.60375	10.03	9.74241
TGME49_202190	hypothetical protein	N/A	-0.62	0.014	0.0605	14.3728	14.6068	13.991	13.7493	11.5664	11.5792
TGME49_202200	hypothetical protein	N/A	0.8	0.238	0.416	8.96749	10.8052	10.0501	11.505	10.9015	10.8565
TGME49_202205	hypothetical protein	N/A	1.47	5.96e-05	0.000966	16.2091	16.3179	17.2414	18.1048	10.6551	10.7311
TGME49_202210	nucleoside diphosphate kinase	N/A	0.05	0.932	0.968	8.15509	9.23477	8.82656	8.86496	3.97833	5.16807
TGME49_202220	IMC suture-associated protein ISAP1	ISAP1	3.7	0.0745	0.192	4.95306	0	5.93607	8.35171	9.86102	9.60671
TGME49_202230	histone deacetylase HDAC5	HDAC5	-1.14	0.00353	0.0221	6.82991	7.50018	5.93607	6.22493	11.9582	11.8763
TGME49_202240	RAP domain-containing protein	N/A	0.77	0.276	0.46	4.73841	3.32946	5.18389	4.55215	9.24491	8.58854
TGME49_202250	hypothetical protein	N/A	-0.42	0.243	0.423	10.8134	10.7286	10.6529	9.97571	11.9528	11.5728
TGME49_202255	hypothetical protein	N/A	0.14	0.691	0.825	6.8117	6.51607	6.68821	6.86431	10.9771	10.7007
TGME49_202285	EGF family domain-containing protein	N/A	1.2	0.00117	0.00947	15.3797	15.8169	16.4121	17.1379	9.25576	8.9767
TGME49_202290	membrane protein, putative	N/A	-0.43	0.545	0.715	6.63649	7.87252	7.5361	5.95335	8.08097	8.21578
TGME49_202300	inosine triphosphate pyrophosphatase, putative	N/A	4.28	1.37e-15	5.4e-12	7.85947	6.50013	11.1088	11.9758	11.9991	12.1997
TGME49_202310	O-sialoglycoprotein endopeptidase	N/A	0.63	0.039	0.124	8.76937	8.34819	9.16934	9.22739	14.3602	14.6753
TGME49_202340	proline dehydrogenase	N/A	1.91	0.067	0.178	0	2.00628	2.30094	3.40951	11.9948	12.3465
TGME49_202350	50S ribosomal protein L21, putative	N/A	0.71	0.0179	0.0726	12.5464	12.4593	12.9435	13.4443	11.1428	11.3559
TGME49_202360	methylase, putative	N/A	-1.44	0.514	0.689	2.40114	0	0	1.3809	6.08068	5.52892
TGME49_202370	T-complex protein 1, epsilon subunit (TCP-1-epsilon), putative	N/A	0.03	0.896	0.949	12.8848	12.6155	12.7086	12.8673	7.64404	7.62802
TGME49_202375	hypothetical protein	N/A	0.73	0.733	NA	3.45836	2.00628	4.36729	1.3809	0.593608	3.5552
TGME49_202380	rab GDI alpha, putative	N/A	0.35	0.182	0.35	11.3587	11.5758	11.7357	11.9069	13.8091	14.0591
TGME49_202390	mature soluble cytoskeleton protein MSC1B	MSC1B	3.38	5.78e-05	0.000952	5.74991	3.00733	7.66268	8.68546	9.73914	9.19758
TGME49_202400	calcium binding egf domain-containing protein	N/A	0.66	0.0231	0.0865	16.63	16.2024	16.9776	17.2082	11.6178	11.3875
TGME49_202410	CRAL/TRIO domain-containing protein	N/A	-0.91	0.00434	0.0257	14.8843	14.7966	14.1706	13.6556	11.6238	11.2384
TGME49_202420	hypothetical protein	N/A	2.19	4.34e-06	0.000137	6.28688	5.70865	7.87871	8.44764	8.17798	8.15448
TGME49_202430	hypothetical protein	N/A	0.37	0.0966	0.229	15.0721	15.0753	15.3576	15.5345	12.255	12.3222
TGME49_202440	hypothetical protein	N/A	-0.11	0.927	0.965	5.3564	4.46742	5.66539	2.89088	5.45145	4.85614
TGME49_202445	hypothetical protein	N/A	-3.74	0.238	NA	0	3.00733	0	0	4.54823	3.18051
TGME49_202450	hypothetical protein	N/A	-0.29	0.6	0.755	9.16696	8.85384	9.30093	7.75474	11.742	12.4163
TGME49_202460	diacylglycerol kinase accessory domain (presumed) domain-containing protein	DGK1	-0.01	0.973	0.992	9.29705	9.33479	9.28285	9.33165	9.13687	9.00415
TGME49_202470	rRNA metabolism protein, SBDS family protein	N/A	-1.13	0.00289	0.019	9.2128	8.79951	8.2138	7.48445	12.1896	12.3117
TGME49_202480	hypothetical protein	N/A	0.3	0.635	0.783	4.18022	4.81543	5.13096	4.44996	8.07826	8.21317
TGME49_202490	AP2 domain transcription factor AP2VIIa-7	AP2VIIA7	-0.46	0.196	0.368	14.4573	14.3146	13.5247	14.2353	10.5664	10.1582
TGME49_202500	glideosome-associated protein with multiple-membrane spans GAPM1A	GAPM1A	3.82	4.4e-05	0.00078	6.08933	2.32863	8.35894	9.37064	10.7048	10.7479
TGME49_202510	glideosome-associated protein with multiple-membrane spans GAPM1B	GAPM1B	-1.67	0.147	0.304	5.89539	5.05251	4.69354	2.07335	5.04737	5.31172
TGME49_202520	hypothetical protein	N/A	0.48	0.118	0.261	14.8372	14.5362	14.8977	15.4019	12.1804	12.1816
TGME49_202530	aspartate-tRNA ligase	N/A	0.49	0.0494	0.145	12.4348	12.5794	13.0763	12.9116	10.0945	10.2798
TGME49_202540	3'5'-cyclic nucleotide phosphodiesterase PDE1	PDE1	-0.69	0.0221	0.0837	13.6751	13.2841	12.9353	12.6472	11.5753	11.2749
TGME49_202550	basal complex component BCC6	BCC6	0.35	0.461	0.645	8.44827	8.30296	8.16198	9.13573	9.5444	9.00717
TGME49_202568	FAM32A domain-containing protein	N/A	1.5	0.142	0.296	1.27942	2.00628	2.30094	3.40951	9.03136	9.54366
TGME49_202572	ribophorin i protein	N/A	-0.45	0.224	0.401	9.31009	9.47393	9.16276	8.69107	8.75874	8.35023
TGME49_202580	chaperone protein ClpB5, putative	ClpB5	-0.16	0.725	0.847	8.92151	9.59707	8.58235	9.52626	10.9543	10.5913
TGME49_202590	hypothetical protein	N/A	-1.33	0.0129	0.0574	11.0209	10.5839	10.0661	8.52508	11.4934	11.6713
TGME49_202600	hypothetical protein	N/A	0.52	0.601	0.756	4.3912	5.25608	5.84042	4.73709	3.02259	2.78978
TGME49_202610	protein phosphatase PPM3D	PPM3D	0.38	0.294	0.479	11.7342	12.0101	11.8128	12.6003	13.0934	13.0597
TGME49_202620	dense granule protein GRA64	GRA64	0.47	0.367	0.555	9.05913	9.99563	9.4325	10.5206	9.06739	9.2068
TGME49_202630	ATP-dependent metallopeptidase HflB subfamily protein	N/A	-0.88	0.00527	0.03	10.5831	10.4831	9.87008	9.40176	12.9942	12.6497
TGME49_202640	tRNA pseudouridine synthase 1	PUS1	2.61	0.371	NA	0	0	1.8554	0	4.38209	4.4925
TGME49_202650	hypothetical protein	N/A	-0.44	0.4	0.588	5.71113	6.11677	5.58897	5.41657	9.41591	8.7576
TGME49_202680	cytochrome b-c1 complex subunit 2	QCR2	-0.88	0.000508	0.00493	13.3496	13.5356	12.6807	12.4504	12.1874	12.3211
TGME49_202690	DNA-directed RNA polymerase II RPB9	POLR2I	-0.73	0.0218	0.083	8.24608	8.18825	7.65332	7.30581	10.8677	11.0453
TGME49_202700	hypothetical protein	N/A	-0.23	0.332	0.52	11.0337	11.0293	10.7394	10.8552	9.90227	9.87059
TGME49_202720	RNB family domain-containing protein	N/A	-1.75	0.0288	0.101	6.86567	6.63764	5.54918	4.2209	5.88332	5.00852
TGME49_202730	hypothetical protein	N/A	-0.89	0.0352	0.116	13.9366	13.7801	12.8013	13.1248	7.92956	6.84553
TGME49_202740	pseudouridine synthase, putative	N/A	-1.19	0.000989	0.00834	8.68182	8.4262	7.50524	7.23075	8.96384	8.79301
TGME49_202750	3' exoribonuclease family, domain 1 domain-containing protein	N/A	-0.37	0.296	0.482	8.65141	8.153	8.20742	7.88773	12.2451	12.5834
TGME49_202760	hypothetical protein	N/A	-1.43	0.00136	0.0105	9.2872	9.1273	8.20102	7.18376	10.1277	10.4453
TGME49_202770	RNA recognition motif-containing protein	N/A	1.32	0.00459	0.0269	8.14057	7.45127	8.52709	9.5847	13.9556	13.8612
TGME49_202780	rhoptry kinase family protein ROP25	ROP25	-0.02	0.951	0.98	9.47832	9.23718	9.14952	9.51365	11.3432	10.9263
TGME49_202790	dihydrouridine synthase (dus) protein	N/A	-0.93	0.0125	0.0561	12.8837	13.094	12.4155	11.5998	10.6248	10.8648
TGME49_202800	cytochrome c oxidase assembly protein COX11 protein, putative	N/A	0.75	0.0529	0.151	8.98791	9.06092	9.39371	10.0756	5.66913	5.59461
TGME49_202810	mitochondrial import inner membrane translocase subunit TIM14	PAM18	0.76	0.00278	0.0185	11.0934	10.881	11.7043	11.7955	9.79228	9.92268
TGME49_202820	ubiquitin-conjugating enzyme subfamily protein	N/A	0.34	0.211	0.385	9.3548	9.19571	9.65733	9.5665	10.3595	10.304
TGME49_202830	Elicitor-responsive protein, putative	N/A	3.48	1.37e-07	1.23e-05	2.74623	3.00733	5.33191	6.73991	16.0998	16.3264
TGME49_202840	FHA domain-containing protein	N/A	-0.32	0.251	0.433	14.1518	14.1813	13.6574	14.008	12.9194	12.5911
TGME49_202850	ATP-binding domain-containing protein	N/A	-0.11	0.873	0.937	7.1957	7.20799	6.05448	7.68896	5.25392	4.8291
TGME49_202860	hypothetical protein	N/A	-0.79	0.0629	0.17	11.5806	11.0161	10.9257	10.012	10.927	10.9473
TGME49_202870	SAP domain-containing protein	N/A	-0.69	0.153	0.312	10.1976	9.69136	9.73917	8.59857	9.63954	9.47554
TGME49_202880	carrier superfamily protein	N/A	-1.12	0.0358	0.117	11.6762	11.0918	10.6945	9.75509	9.18939	8.09045
TGME49_202890	hypothetical protein	N/A	-0.12	0.73	0.851	13.0147	13.1067	13.2365	12.5633	13.824	14.287
TGME49_202900	zinc finger (CCCH type) motif-containing protein	N/A	-0.19	0.638	0.784	9.02791	9.22268	8.7051	9.14802	5.45145	5.91056
TGME49_202910	zinc carboxypeptidase superfamily protein	N/A	1.29	0.000132	0.00171	14.9561	14.9832	15.8685	16.5614	9.42663	9.18564
TGME49_202920	p-aminobenzoic acid synthase	N/A	1.52	0.000432	0.00435	11.9093	11.7105	12.6639	13.7852	8.9944	8.87131
TGME49_202930	IMC sutures component ISC5	ISC5	-0.18	0.91	0.956	3.45836	0	2.64086	2.07335	12.9571	13.1413
TGME49_202940	hypothetical protein	N/A	-0.65	0.104	0.24	11.7251	11.8373	11.5383	10.5579	12.7298	12.9469
TGME49_202950	hypothetical protein	N/A	-0.19	0.597	0.753	9.76061	10.3201	9.60735	10.1011	11.3004	11.0747
TGME49_202960	glycine cleavage H-protein	N/A	0.63	0.0547	0.155	9.43435	9.25866	9.75456	10.167	7.56092	7.44868
TGME49_202970	hypothetical protein	N/A	-0.67	0.141	0.295	8.55615	8.44714	8.08059	7.54767	2.82948	3.18051
TGME49_202975	hypothetical protein	N/A	0.36	0.608	0.761	4.88499	5.00811	4.36729	5.87664	8.1105	8.08475
TGME49_202980	hypothetical protein	N/A	1.03	0.313	0.5	2.74623	0	2.91577	2.07335	10.3595	10.1997
TGME49_203010	aurora-related kinase ARK3	ARK3	2.83	9.06e-06	0.000239	7.20968	5.09559	9.27067	9.36363	11.4423	11.1242
TGME49_203020	ribosome biogenesis GTPase Der protein	N/A	1.36	0.0358	0.117	4.73841	4.25586	5.18389	6.28553	8.48514	8.18945
TGME49_203030	N-methyl-D-aspartate receptor-associated protein	N/A	0.38	0.101	0.235	14.0147	14.152	14.4462	14.4839	13.2617	13.4337
TGME49_203040	hypothetical protein	N/A	0.53	0.135	0.286	12.6067	12.6411	12.7098	13.4959	11.1169	10.9536
TGME49_203050	AP2 domain transcription factor AP2VIIa-6	AP2VIIA6	1.43	0.000199	0.00241	8.23245	8.61568	9.51743	10.1529	9.90611	10.1582
TGME49_203060	hypothetical protein	N/A	0.53	0.181	0.348	6.77456	5.91512	6.8928	6.97884	12.4973	12.5877
TGME49_203070	hypothetical protein	N/A	1.59	4.1e-05	0.000738	14.2085	14.4835	15.4066	16.3284	8.71397	8.70838
TGME49_203080	RNA recognition motif-containing protein	N/A	-0.16	0.685	0.821	9.05139	9.90469	9.48353	9.26173	11.9537	12.2417
TGME49_203090	hypothetical protein	N/A	0.58	0.035	0.115	15.3466	15.4407	15.9114	16.0339	8.97702	8.53726
TGME49_203100	hypothetical protein	N/A	0.57	0.0191	0.0761	12.4058	12.4341	12.9863	12.997	5.41749	5.16807
TGME49_203110	citrate synthase, putative	N/A	0.4	0.0788	0.199	13.2699	13.2839	13.6578	13.7025	9.5444	9.35396
TGME49_203120	hypothetical protein	N/A	-0.95	0.145	0.301	5.19712	4.32988	4.45603	3.17338	9.99226	10.175
TGME49_203135	dynein heavy chain family protein	N/A	1.04	0.000221	0.0026	13.1919	13.4112	14.1349	14.5355	9.4362	9.57145
TGME49_203150	hypothetical protein	N/A	-0.97	0.00946	0.046	12.0056	11.361	10.9199	10.544	10.5201	10.1049
TGME49_203160	hypothetical protein	N/A	-0.18	0.776	0.88	6.28688	6.00824	6.66978	4.55215	12.9915	13.0299
TGME49_203170	OB-fold nucleic acid binding domain-containing protein	N/A	-0.07	0.812	0.901	10.3521	10.5763	10.4786	10.3179	6.99712	6.98679
TGME49_203180	leucine rich repeat-containing protein	N/A	-0.83	0.0204	0.08	11.3766	11.1228	10.1893	10.6385	9.45515	8.92496
TGME49_203200	hypothetical protein	N/A	-0.41	0.381	0.569	9.89212	9.23718	9.4461	8.87485	6.85211	6.15877
TGME49_203220	DEAD/DEAH box helicase domain-containing protein	N/A	-1.62	0.000524	0.00504	8.32526	7.57818	6.66978	6.02619	10.7869	10.3611
TGME49_203230	hypothetical protein	N/A	0.42	0.177	0.343	13.9102	14.2878	14.3722	14.6831	14.3497	14.7438
TGME49_203240	hypothetical protein	N/A	0.36	0.248	0.429	10.5409	10.5687	10.577	11.1973	16.5575	16.4302
TGME49_203250	hypothetical protein	N/A	2.42	0.000221	0.0026	7.36765	6.158	8.34739	9.85843	8.84909	8.76118
TGME49_203260	cell cycle checkpoint protein RAD17, putative	N/A	-0.65	0.096	0.228	11.3389	11.1714	10.6447	10.5777	9.1264	8.2442
TGME49_203270	ATP-dependent Clp endopeptidase, proteolytic subunit ClpP domain-containing protein	N/A	-0.72	0.0321	0.109	12.6988	12.4591	12.0808	11.605	9.16016	8.6972
TGME49_203280	hypothetical protein	N/A	0.62	0.0206	0.0803	15.1883	14.9348	15.6097	15.7713	11.9115	12.2142
TGME49_203290	dense granule protein GRA34	GRA34	-0.48	0.574	0.737	4.0619	5.98552	4.83261	4.90099	6.99712	7.71182
TGME49_203300	DUF726 domain-containing protein	N/A	-0.74	0.0475	0.141	10.0827	9.98134	8.94627	9.57563	10.4546	10.0155
TGME49_203310	dense granule protein GRA7	GRA7	-0.25	0.656	0.799	4.88499	6.46771	5.23493	5.99023	19.2092	19.5029
TGME49_203320	zinc finger in N-recognin protein	N/A	-0.76	0.0124	0.0558	12.1652	11.896	11.3758	11.1634	11.6217	11.1891
TGME49_203330	hypothetical protein	N/A	0.9	0.443	0.627	1.27942	3.32946	4.27274	1.3809	8.22782	7.95944
TGME49_203340	metallo-beta-lactamase domain-containing protein	N/A	-0.92	0.0155	0.0653	10.9999	11.1511	10.3643	9.90746	10.4862	11.2004
TGME49_203350	hypothetical protein	N/A	-0.33	0.83	NA	3.0245	3.32946	2.91577	2.89088	2.48056	2.99833
TGME49_203358	hypothetical protein	ICAP10	-0.09	0.684	0.821	12.5009	12.4833	12.4504	12.3542	12.0438	11.9977
TGME49_203362	prefoldin, putative	ICAP5	0.32	0.315	0.502	11.6489	12.0687	12.3403	12.0272	11.306	11.6038
TGME49_203370	Utp12 domain-containing protein	N/A	-0.8	0.25	0.431	5.40581	5.40049	2.91577	5.41657	10.913	11.1106
TGME49_203375	cpw-wpc domain-containing protein	N/A	1.57	8.27e-05	0.00124	13.9824	14.0797	15.0107	16.0211	8.15498	8.1974
TGME49_203380	DnaJ domain-containing protein	N/A	0.49	0.312	0.499	7.27761	7.04173	7.08591	8.10506	9.48415	9.17226
TGME49_203390	CRAL/TRIO domain-containing protein	N/A	-2.43	0.000112	0.00153	6.28688	6.45122	4.76475	2.07335	11.6811	11.8972
TGME49_203400	hypothetical protein	N/A	-1	0.00211	0.0149	8.48896	8.28447	7.55631	7.1996	11.215	11.4562
TGME49_203420	4'-phosphopantetheinyl transferase domain-containing protein	N/A	-0.6	0.224	0.4	8.11108	7.39203	7.57624	6.67344	10.5702	10.1697
TGME49_203440	anaphase-promoting complex subunit APC10	APC10	-1.58	0.00435	0.0257	8.73595	8.09049	7.18009	6.47957	6.5801	5.9234
TGME49_203450	brain colonization protein BCP1	BCP1	-0.95	0.17	0.335	6.50663	5.93897	5.33191	5.30391	4.88288	5.12426
TGME49_203460	mitochondrial distribution and morphology protein, putative	N/A	-0.22	0.698	0.829	4.95306	5.56278	5.54918	4.33997	9.76638	10.1851
TGME49_203470	hypothetical protein	N/A	0.19	0.822	0.906	5.89539	6.53184	6.05448	6.73991	3.97833	2.54591
TGME49_203480	hypothetical protein	N/A	-1.48	4.28e-06	0.000136	10.2098	10.1858	8.80982	8.62226	9.45201	9.02366
TGME49_203490	GNL3L/Grn1 GTPase	N/A	-0.73	0.139	0.292	10.6779	10.0636	10.1382	8.97944	7.14454	7.18641
TGME49_203500	alanine dehydrogenase/pyridine nucleotide transhydrogenase domain-containing protein	N/A	0.78	0.0759	0.194	10.0481	9.7001	10.0905	11.0717	8.70168	8.98438
TGME49_203505	hypothetical protein	N/A	0.66	0.0727	0.189	7.16732	7.48406	8.20742	7.73314	10.1218	10.1459
TGME49_203510	zinc finger, C3HC4 type (RING finger) domain-containing protein	N/A	-0.74	0.0176	0.0716	13.7158	13.6843	13.2111	12.6687	10.6483	10.9046
TGME49_203520	hypothetical protein	N/A	-1.63	0.00628	0.0343	12.3242	11.5553	10.9354	9.3949	9.3811	8.55593
TGME49_203540	RNA binding protein, putative	N/A	0.72	0.0109	0.0508	14.5777	14.691	15.1219	15.5556	13.3678	13.5524
TGME49_203590	hypothetical protein	N/A	0.63	0.774	0.879	4.28956	0	4.61863	2.53927	1.6022	1.65581
TGME49_203600	dense granule protein GRA50	GRA50	0.56	0.165	0.328	8.05798	7.88485	8.54237	8.51878	7.64771	8.22877
TGME49_203610	3'-5' exoribonuclease csl4, putative	N/A	1.73	0.00111	0.0091	4.18022	3.59264	5.90489	5.04816	11.7492	12.1027
TGME49_203620	ribosomal protein RPS35	RPS35	-1.56	0.0529	0.151	5.86037	5.00811	4.27274	3.61237	6.45175	6.39834
TGME49_203630	ribosomal protein RPL44	RPL44	-0.52	0.156	0.315	8.38191	8.26573	7.87066	7.73314	8.81036	9.24694
TGME49_203665	hypothetical protein	N/A	1.59	0.0273	0.0971	4.48614	4.59299	5.07603	6.69594	8.91751	8.27709
TGME49_203682	hypothetical protein	N/A	0.7	0.145	0.3	4.48614	3.81513	4.83261	4.82137	12.168	12.3441
TGME49_203685	hypothetical protein	N/A	0.34	0.3	0.487	7.4641	7.80275	7.85443	8.18676	11.9698	12.165
TGME49_203688	hypothetical protein	N/A	0.18	0.644	0.79	8.6768	8.4388	8.26382	9.07265	12.2958	12.0686
TGME49_203690	AP2 domain transcription factor AP2VIIa-5	AP2VIIA5	0.79	0.0314	0.106	14.2077	14.2126	14.5818	15.318	12.3528	11.9067
TGME49_203700	SFT2 family protein	N/A	0.1	0.931	0.967	4.81356	3.46704	4.61863	4.09112	2.48056	2.89782
TGME49_203710	AP2 domain transcription factor AP2VIIa-4	AP2VIIA4	0.68	0.407	0.594	3.93301	3.59264	4.45603	4.33997	6.32008	6.62747
TGME49_203720	vitamin k epoxide reductase family protein	N/A	-0.53	0.156	0.315	15.9871	16.7518	16.0694	15.6922	16.8863	17.1568
TGME49_203730	hypothetical protein	N/A	1.28	0.232	0.41	0	3.17737	3.94503	2.89088	8.02568	8.04418
TGME49_203740	hypothetical protein	N/A	0.27	0.652	0.796	7.0479	8.43461	7.78761	8.48688	7.36548	7.4263
TGME49_203750	hypothetical protein	N/A	-1.51	0.247	0.428	1.94666	2.59194	1.8554	0	9.09586	8.48192
TGME49_203760	hypothetical protein	N/A	-0.24	0.401	0.588	9.79347	9.87873	9.69655	9.50093	8.99584	8.87957
TGME49_203770	hypothetical protein	N/A	0.03	0.969	0.99	3.93301	3.59264	3.94503	3.61237	6.7871	6.45249
TGME49_203780	hypothetical protein	N/A	-0.53	0.0679	0.18	11.0009	11.398	10.7894	10.5732	11.4557	11.3627
TGME49_203790	hypothetical protein	N/A	3.47	1.1e-07	1.08e-05	4.57522	2.81453	6.51316	7.78653	13.2253	13.4775
TGME49_203800	hypothetical protein	N/A	1.09	0.254	0.436	1.27942	2.81453	3.67619	2.53927	8.29249	8.262
TGME49_203810	kelch repeat-containing protein	N/A	1.12	8.82e-05	0.00129	14.91	14.6357	15.7775	16.0062	14.3336	14.6775
TGME49_203815	hypothetical protein	N/A	0.6	0.597	0.753	3.45836	3.32946	3.94503	3.94849	4.88288	4.14325
TGME49_203820	hypothetical protein	N/A	0.39	0.178	0.345	7.9948	8.29375	8.58235	8.49973	11.6975	11.8149
TGME49_203830	FHA domain-containing protein	N/A	0.16	0.703	0.833	17.0383	16.7016	16.6993	17.3136	11.2636	10.4093
TGME49_203840	DEAD/DEAH box helicase domain-containing protein	N/A	-0.86	0.0114	0.0524	11.6931	11.4668	10.7872	10.663	8.9944	8.36207
TGME49_203860	hypothetical protein	N/A	-0.15	0.669	0.809	9.33581	9.1657	9.34226	8.82469	9.77981	9.63723
TGME49_203870	pre-mRNA-splicing factor ISY1, putative	N/A	-1.03	0.0103	0.0488	9.3548	9.3899	8.71412	7.8481	12.9222	13.3835
TGME49_203880	hypothetical protein	N/A	1.47	4.41e-05	0.00078	8.65653	8.71571	9.70563	10.4951	13.8583	13.7716
TGME49_203890	hypothetical protein	N/A	2.06	3.49e-08	4.5e-06	11.8806	11.242	13.3288	13.9196	11.7249	11.8542
TGME49_203900	FAM184 domain-containing protein	N/A	0.15	0.76	0.868	8.23928	7.81569	7.71755	8.52508	7.09706	7.47072
TGME49_203910	TBC domain-containing protein TBC10	TBC10	-0.48	0.12	0.263	14.0199	13.7472	13.5756	13.2196	12.1551	11.7454
TGME49_203930	hypothetical protein	N/A	2.71	1.52e-07	1.31e-05	6.91769	5.78958	8.83899	9.40859	8.81689	8.77895
TGME49_203940	ABC1 protein	N/A	-0.03	0.951	0.98	5.54464	5.05251	5.46616	5.04816	9.85548	9.48098
TGME49_203950	Myb family DNA-binding domain-containing protein	N/A	-0.4	0.315	0.502	14.5507	14.2828	13.5246	14.4007	10.3589	9.9906
TGME49_203960	hypothetical protein	N/A	-0.95	0.00078	0.00691	10.3008	10.2408	9.48089	9.1521	11.8567	11.6634
TGME49_203970	dolichyl-diphosphooligosaccharide--protein glycosyltransferase	N/A	0.57	0.452	0.635	6.28688	4.9623	5.87301	6.67344	7.75358	6.88545
TGME49_203980	hypothetical protein	N/A	-0.8	0.0154	0.0651	11.0953	10.9885	10.0678	10.4075	11.433	10.9151
TGME49_203985	hypothetical protein	N/A	0	1	1	0	0	0	0	4.48405	4.77346
TGME49_203990	rhoptry protein ROP12	ROP12	2.62	1.21e-07	1.12e-05	6.33869	6.9625	8.72755	9.70328	9.53453	9.31673
TGME49_204000	hypothetical protein	N/A	0.11	0.683	0.82	11.7348	11.6966	11.9609	11.676	6.05882	6.20156
TGME49_204010	hypothetical protein	N/A	0.08	0.731	0.851	14.0472	14.1367	14.1031	14.2449	9.10522	8.90082
TGME49_204020	ribosomal protein RPL8	RPL8	-0.67	0.199	0.372	8.76937	8.78643	8.5625	7.41833	8.93862	9.6633
TGME49_204040	hypothetical protein	N/A	0.53	0.0555	0.156	12.2631	12.2345	12.6455	12.8977	11.7677	11.4198
TGME49_204045	hypothetical protein	N/A	1.17	0.039	0.124	5.45359	4.65189	6.02578	6.42674	8.1316	8.12699
TGME49_204050	subtilisin SUB1	SUB1	0.2	0.507	0.684	10.1513	9.6737	10.2181	10.0365	15.5904	15.3926
TGME49_204060	syntaxin-12	STX12	-0.07	0.802	0.896	11.5973	11.6106	11.6941	11.3549	12.4517	12.1803
TGME49_204070	YT521-B family protein	N/A	-0.6	0.0437	0.133	8.23928	8.19322	7.81303	7.37716	12.7803	12.722
TGME49_204080	histidine acid phosphatase superfamily protein	N/A	-0.22	0.54	0.711	10.8384	10.3076	10.4518	10.3015	12.0787	11.5373
TGME49_204090	eIF2 kinase IF2K-C	N/A	1.33	0.271	0.453	5.13987	2.59194	5.18389	5.99023	4.97916	3.79764
TGME49_204100	eIF2 kinase IF2K-C	N/A	1.13	0.0208	0.0805	10.4496	10.0224	10.5918	11.8881	12.2193	11.9232
TGME49_204110	eIF2 kinase IF2K-C	N/A	-0.87	0.00779	0.04	7.73933	7.93907	6.92424	7.03286	10.5266	10.3505
TGME49_204120	pre-mRNA-splicing factor CWC25, putative	N/A	-0.1	0.763	0.87	12.639	12.4407	12.7517	12.0404	10.8861	10.9845
TGME49_204130	perforin-like protein PLP1	PLP1	-0.04	0.877	0.939	11.3696	11.5644	11.5224	11.338	16.1159	15.9934
TGME49_204140	PHD-finger domain-containing protein	N/A	-0.51	0.258	0.44	12.4073	12.236	11.5466	12.047	9.0073	7.90869
TGME49_204160	GYF domain-containing protein	N/A	-1.2	3.96e-05	0.000715	10.8485	10.7732	9.69655	9.52312	8.51757	8.18945
TGME49_204270	dense granule protein GRA60	GRA60	0.19	0.503	0.68	10.3251	10.3053	10.3884	10.6166	5.40021	5.2519
TGME49_204280	cell-cycle-associated protein kinase DYRK1	DYRK1	-0.7	0.0267	0.0957	11.1838	10.9024	10.2307	10.4594	10.962	10.5291
TGME49_204290	hypothetical protein	N/A	-0.03	0.959	0.983	6.36391	7.22748	6.51316	7.10189	7.24478	7.62409
TGME49_204300	hypothetical protein	N/A	-0.98	0.285	0.47	5.01805	5.00811	2.91577	4.73709	6.4931	6.4701
TGME49_204310	hypothetical protein	N/A	-0.54	0.127	0.275	14.641	14.3302	13.842	14.0676	11.4317	10.7311
TGME49_204320	hypothetical protein	N/A	1.29	0.0327	0.11	6.28688	5.68063	6.26561	7.88773	10.4594	10.7053
TGME49_204325	hypothetical protein	N/A	0.16	0.76	0.868	6.8117	6.23708	6.75968	6.65058	6.95631	7.20756
TGME49_204330	hypothetical protein	N/A	-0.05	0.932	0.968	7.62923	7.57057	7.83801	7.1996	3.11024	2.54591
TGME49_204340	dense granule protein GRA54	GRA54	0.62	0.188	0.358	7.69032	8.74644	8.44817	9.30263	14.9625	14.9754
TGME49_204350	GTP-binding protein, putative	N/A	1.45	0.000317	0.00342	9.61852	9.29145	10.4786	11.2476	9.41161	9.03258
TGME49_204360	subtilisin SUB4	SUB4	-0.88	0.0112	0.0517	11.1352	11.2775	10.6352	9.92661	12.3804	12.5416
TGME49_204370	mitochondrial pyruvate carrier protein 2	MPC2	-0.37	0.369	0.558	9.59475	10.113	9.7169	9.2655	6.64023	7.17034
TGME49_204380	hypothetical protein	N/A	-0.92	0.0107	0.0502	12.6678	12.4196	11.3097	11.8924	7.83945	7.33796
TGME49_204390	hypothetical protein	N/A	-0.33	0.299	0.485	8.70668	8.39636	8.26995	8.17879	9.76638	9.86977
TGME49_204395	hypothetical protein	N/A	-0.34	0.434	0.619	10.0789	9.44299	9.81662	9.00669	10.6349	10.838
TGME49_204400	ATPase synthase subunit alpha, putative	N/A	-0.75	0.0113	0.052	10.3203	10.6064	9.89012	9.52312	12.3013	12.4668
TGME49_204410	endonuclease/exonuclease/phosphatase family protein	N/A	-1.28	0.00198	0.0142	7.47572	7.43459	6.28995	6.06127	11.0038	10.3337
TGME49_204420	oocyst wall protein OWP1	OWP1	4	1.05e-06	5.13e-05	12.487	9.45751	14.9023	16.1487	11.7894	11.6748
TGME49_204440	cyclic nucleotide-binding domain-containing protein	N/A	0.43	0.255	0.437	7.55451	7.93315	7.86257	8.41411	10.4266	10.2374
TGME49_204460	hydroxymethylglutaryl-CoA lyase, putative	N/A	-0.48	0.16	0.321	13.4365	13.899	13.424	12.9407	13.9432	14.3079
TGME49_204480	thioredoxin domain-containing protein	N/A	0.05	0.836	0.913	15.6747	15.4866	15.7907	15.4672	12.5011	12.4316
TGME49_204490	hypothetical protein	N/A	0.13	0.724	0.846	13.3299	13.2073	13.7067	13.0086	12.3195	12.7823
TGME49_204500	hypothetical protein	N/A	0.45	0.403	0.59	4.57522	5.43444	5.70214	5.30391	9.48723	9.92747
TGME49_204505	hypothetical protein	N/A	1.92	0.355	0.544	2.40114	2.81453	5.07603	2.89088	2.60648	0
TGME49_204510	WD domain, G-beta repeat-containing protein	N/A	0.36	0.118	0.261	15.7344	15.7631	16.0297	16.1813	11.4068	11.2499
TGME49_204520	hypothetical protein	N/A	3.91	1.79e-06	7.28e-05	13.968	11.0541	16.1623	17.6058	14.7177	14.6985
TGME49_204530	microneme protein MIC11	MIC11	2.78	9.74e-05	0.00138	9.18476	7.48406	10.0801	12.0132	17.5657	17.9077
TGME49_204540	DUF367 domain-containing protein	N/A	-0.54	0.182	0.349	9.41033	9.79136	9.27373	8.855	8.90071	9.50574
TGME49_204550	hypothetical protein	N/A	0.04	0.843	0.918	12.5242	12.5526	12.5868	12.5819	10.2316	10.296
TGME49_204560	type I fatty acid synthase, putative	N/A	-0.41	0.0712	0.186	13.8183	13.7666	13.4513	13.3103	9.11717	9.01319
TGME49_204870	thrombospondin type 1 domain-containing protein	N/A	0.1	0.85	0.922	8.23245	9.37905	8.74527	9.24276	10.5415	11.2436
TGME49_204880	hypothetical protein	N/A	1.08	0.0786	0.198	6.3887	5.78958	6.51316	7.64338	7.61437	7.80496
TGME49_205000	phosphoglycerate mutase family protein	N/A	0.98	0.00325	0.0208	12.6153	12.6675	13.2488	13.9264	10.5741	10.7721
TGME49_205010	splicing factor 3B subunit 1, putative	N/A	0.21	0.616	0.768	8.05023	8.76657	8.20742	9.02013	12.5847	12.5807
TGME49_205020	hypothetical protein	N/A	3.75	0.00182	0.0134	11.7336	8.29375	14.1023	14.9898	11.9506	11.7787
TGME49_205030	protein transport protein BET1, putative	N/A	0.2	0.48	0.66	10.9878	11.192	11.2902	11.3064	12.8128	13.2343
TGME49_205040	PGAP1 family protein	N/A	0.4	0.372	0.562	9.18476	9.30757	9.06388	10.0605	10.7948	10.3223
TGME49_205050	hypothetical protein	N/A	-1.1	0.0252	0.0921	13.7101	13.2809	12.8481	11.7935	9.40296	8.52888
TGME49_205060	hypothetical protein	N/A	0.94	0.134	0.284	3.25768	3.32946	4.61863	3.40951	10.895	11.0947
TGME49_205070	hypothetical protein	N/A	1.31	7.25e-05	0.00111	14.3634	14.621	15.4572	16.0886	8.59557	8.73957
TGME49_205080	hypothetical protein	N/A	0.05	0.931	0.967	9.33581	9.5952	10.0322	8.69107	3.19287	2.54591
TGME49_205090	Toxoplasma gondii family D protein	N/A	1.77	1.2e-06	5.68e-05	15.8488	15.3937	17.0137	17.7256	13.5227	13.3357
TGME49_205100	hypothetical protein	N/A	1.3	0.256	0.439	5.99562	1.00419	6.1639	6.42674	9.76891	9.38909
TGME49_205120	hypothetical protein	N/A	0.14	0.918	0.96	3.45836	0	1.8554	3.17338	7.96232	7.23357
TGME49_205140	hypothetical protein	N/A	2.2	1.03e-05	0.000262	7.45239	7.9567	9.24288	10.3783	8.84431	8.95654
TGME49_205150	ACR, YagE family COG1723 domain-containing protein	N/A	-0.33	0.363	0.552	11.7923	11.825	11.4866	11.4622	6.87105	5.99812
TGME49_205160	zinc finger CCHC domain-containing protein	N/A	-0.67	0.0192	0.0763	12.3134	12.3263	11.6294	11.664	9.92133	9.44693
TGME49_205170	hypothetical protein	N/A	-0.84	0.113	0.254	6.77456	7.06359	6.44975	5.61851	8.1158	8.50559
TGME49_205180	RNA recognition motif-containing protein	N/A	-0.82	0.0766	0.195	12.0963	12.4154	11.8613	10.8651	9.69286	10.4155
TGME49_205190	hypothetical protein	N/A	-0.04	0.956	0.982	7.0787	8.33477	6.81105	8.38671	7.50542	7.3235
TGME49_205200	hypothetical protein	N/A	2.11	1.04e-06	5.13e-05	5.78768	5.68063	7.77904	7.86805	7.87116	7.67053
TGME49_205210	hypothetical protein	N/A	1.07	0.000242	0.00276	14.8698	14.7413	15.6271	16.0921	10.2588	10.4707
TGME49_205220	U5 snRNP-associated subunit, putative	N/A	0.47	0.0973	0.23	13.9425	13.7727	14.0854	14.5468	12.0077	11.9464
TGME49_205230	hypothetical protein	N/A	2.31	3.05e-07	2.25e-05	6.59449	6.23708	8.60192	8.82469	5.51707	5.96124
TGME49_205240	cleft lip and palate transmembrane protein 1 (clptm1) protein	N/A	-0.3	0.372	0.561	10.9172	10.5172	10.6576	10.1589	11.4043	11.2
TGME49_205250	rhoptry protein ROP18	ROP18	3.34	5.13e-07	3.11e-05	8.87841	7.03067	10.7328	12.0869	12.5254	12.6046
TGME49_205265	transporter, cation channel family protein	N/A	-0.05	0.934	0.97	8.52295	7.18822	8.16856	7.70014	6.86476	7.82221
TGME49_205280	hypothetical protein	N/A	0.51	0.0508	0.147	15.6456	15.5805	16.2085	16.0286	14.8783	15.207
TGME49_205290	glucan phosphatase Laforin	N/A	-0.39	0.0977	0.23	14.913	15.0227	14.6849	14.4579	13.4048	13.4901
TGME49_205300	hypothetical protein	N/A	-0.56	0.117	0.259	9.45209	10.1351	9.24288	9.30629	11.1033	10.892
TGME49_205320	hypothetical protein	N/A	0.9	0.000997	0.0084	13.7838	13.7961	14.4958	14.8589	13.3762	13.6206
TGME49_205330	hypothetical protein	N/A	1.52	2.18e-06	8.35e-05	7.25082	7.23713	8.47496	8.99313	14.1395	14.3309
TGME49_205340	ribosomal protein RPS12	RPS12	-0.08	0.838	0.915	12.3821	12.8452	12.5683	12.5394	10.7422	11.5466
TGME49_205350	integral membrane protein, GNS1/SUR4 family protein, putative	N/A	1.11	1.46e-05	0.000336	13.5666	13.7019	14.62	14.8685	13.0734	12.8459
TGME49_205360	hypothetical protein	N/A	2.02	0.00249	0.017	9.05527	7.2657	9.81662	10.875	9.89535	9.23024
TGME49_205370	hypothetical protein	N/A	-0.47	0.265	0.448	8.77408	8.91524	8.70056	7.95457	8.55515	8.22618
TGME49_205380	fructose-1,6-bisphosphatase 1	FBP1	0.38	0.213	0.388	10.3458	10.4544	10.9189	10.6268	8.18051	8.53308
TGME49_205390	hypothetical protein	N/A	1.99	0.00655	0.0354	4.18022	3.70817	4.27274	6.62736	13.7237	14.2431
TGME49_205398	DNA repair and recombination protein RAD54, putative	N/A	0.8	0.0247	0.0908	14.8387	15.363	15.6811	16.1407	9.09317	8.63612
TGME49_205402	SNF2 family N-terminal domain-containing protein	N/A	1.27	0.000726	0.00653	14.5476	14.5969	15.3245	16.2229	8.66777	8.52046
TGME49_205410	RNA pseudouridine synthase superfamily protein	N/A	0.7	0.134	0.285	7.81444	6.84119	8.05951	8.13829	9.40945	9.74422
TGME49_205420	aspartate-semialdehyde dehydrogenase	N/A	0.44	0.124	0.27	12.7783	12.6423	13.2186	13.0912	7.5374	7.05839
TGME49_205425	hypothetical protein	N/A	1.21	0.448	NA	2.40114	1.59055	3.14658	2.89088	3.60862	3.74074
TGME49_205430	isovaleryl-CoA dehydrogenase	N/A	0.04	0.897	0.95	11.668	12.2342	11.921	12.1153	9.92738	9.90256
TGME49_205440	CCT chaperonin gamma subunit	N/A	-0.77	0.0617	0.168	12.8033	12.5238	12.3231	11.311	10.7777	10.7756
TGME49_205450	hypothetical protein	N/A	0.46	0.0324	0.109	15.1749	15.1622	15.5925	15.6555	9.3488	9.32401
TGME49_205460	AN1 family Zinc finger domain-containing protein	N/A	0.36	0.194	0.366	12.7792	12.9788	13.2111	13.2832	11.2291	11.6351
TGME49_205470	translation elongation factor 2 family protein, putative	N/A	-0.19	0.433	0.619	8.48322	8.56294	8.35317	8.30856	13.7473	13.809
TGME49_205480	IMC subcompartment protein ISP4	ISP4	4.46	0.0059	0.0326	1.94666	0	1.8554	5.79563	7.58789	7.95319
TGME49_205490	integral membrane protein, putative	N/A	7.99	2.67e-08	3.81e-06	1.27942	0	6.82777	7.59632	13.8545	13.5752
TGME49_205500	U3 small nucleolar RNA-associated protein 14, putative	UTP14	0.86	0.545	0.715	1.94666	0	0	2.53927	9.20938	9.35751
TGME49_205510	nucleolar protein 5, putative	N/A	0.11	0.822	0.906	4.18022	4.86606	4.95945	4.33997	11.7639	12.0335
TGME49_205520	apicomplexan amino acid transporter ApiAT5-2	ApiAT5-2	0.15	0.712	0.838	19.4909	19.1215	19.3762	19.55	13.6529	12.7134
TGME49_205530	hypothetical protein	N/A	-0.14	0.812	0.901	6.8479	6.19808	6.33744	6.55536	5.68349	5.74684
TGME49_205540	DEAD/DEAH box helicase domain-containing protein	N/A	1.12	0.0636	0.172	5.99562	7.12725	7.01466	8.28649	10.4452	10.1182
TGME49_205550	AGC kinase	N/A	0.02	0.964	0.987	8.46001	8.25627	7.69949	8.84999	10.2695	9.65754
TGME49_205558	NAC domain-containing protein	N/A	0.01	0.97	0.99	13.2499	13.4012	13.4503	13.2179	11.7134	12.0539
TGME49_205562	hypothetical protein	N/A	-0.94	0.00573	0.0319	11.7402	11.5132	10.408	10.933	10.223	9.83791
TGME49_205570	sorting assembly machinery subunit SAM50	SAM50	0.32	0.28	0.465	12.9222	12.7235	12.882	13.371	9.70435	9.74422
TGME49_205580	nuclear factor NF4	N/A	-0.5	0.343	0.532	5.86037	4.76295	4.76475	5.04816	11.916	12.4358
TGME49_205590	centrosomal protein CEP131	CEP131	0.16	0.675	0.814	8.46585	8.14277	8.41535	8.53135	5.65462	5.9234
TGME49_205600	zinc finger, C3HC4 type (RING finger) domain-containing protein	N/A	-0.19	0.406	0.593	12.5471	12.443	12.3519	12.2625	11.0905	11.0394
TGME49_205615	hypothetical protein	N/A	-1.18	0.0508	0.147	8.24608	8.45543	6.63219	7.58431	7.90832	6.79752
TGME49_205625	transporter, major facilitator family protein	N/A	-0.71	0.0754	0.194	11.7617	11.2722	11.1002	10.4983	11.5078	10.9307
TGME49_205630	hypothetical protein	N/A	2.21	0.312	NA	1.27942	1.00419	3.14658	2.07335	2.01938	2.40654
TGME49_205640	hypothetical protein	N/A	0.2	0.64	0.787	14.8832	14.5709	14.6806	15.1584	8.59557	7.53905
TGME49_205650	AP2 domain transcription factor AP2VIIa-3	AP2VIIA3	2.93	0.113	0.254	7.20968	1.00419	8.65443	9.50093	9.31346	8.98591
TGME49_205658	F5/8 type C domain-containing protein	N/A	1.44	0.000221	0.0026	16.4477	16.337	17.2851	18.2245	10.5947	10.8299
TGME49_205662	LCCL domain-containing protein	N/A	1.61	4.28e-06	0.000136	13.1083	12.8381	14.1853	14.905	6.96809	7.08149
TGME49_205670	striated fiber assemblin SFA2	SFA2	0.55	0.0139	0.0604	14.7348	14.8757	15.3755	15.3307	11.8182	11.7384
TGME49_205680	hypothetical protein	N/A	-1.38	0.0295	0.103	4.57522	4.76295	3.14658	3.61237	9.14208	8.94242
TGME49_205690	hypothetical protein	N/A	0.3	0.218	0.394	13.2138	13.4154	13.6871	13.5373	10.2019	10.2591
TGME49_205700	cyclophilin precursor	N/A	-0.06	0.906	0.953	4.65912	6.00824	5.33191	5.57062	12.7796	12.9314
TGME49_205710	lysine-tRNA ligase	N/A	-0.24	0.708	0.835	7.0479	6.45122	6.8928	6.06127	4.80621	4.8291
TGME49_205720	Adenosine/AMP deaminase domain-containing protein	N/A	0.13	0.693	0.826	10.1349	10.0932	10.2386	10.2473	7.75358	8.30679
TGME49_205730	hypothetical protein	N/A	1.53	4.59e-05	0.000803	7.60827	7.08512	8.57741	9.14394	11.8925	12.0603
TGME49_205740	ER membrane protein complex subunit 1, putative	EMC1	0.06	0.841	0.917	13.8712	13.6674	13.8311	13.8354	10.3706	9.86728
TGME49_205750	histone deacetylase complex subunit Sin3	SIN3	0.08	0.769	0.874	9.65474	9.52603	9.81452	9.52312	11.284	11.5136
TGME49_205760	membrane protein	N/A	1.28	0.00035	0.00372	16.552	16.6686	17.4315	18.2467	10.651	10.48
TGME49_205770	hypothetical protein	N/A	0	1	NA	0	0	0	0	1.82582	2.25225
TGME49_206290	hypothetical protein	N/A	0.67	0.607	0.76	3.0245	2.59194	3.14658	3.7902	4.85778	4.1865
TGME49_206300	hypothetical protein	N/A	3.68	0.0517	0.149	1.27942	0	0	4.09112	7.58024	8.34308
TGME49_206310	prenyltransferase, UbiA family protein	N/A	0.9	0.151	0.31	2.74623	3.81513	3.94503	4.55215	10.0208	10.0606
TGME49_206320	hypothetical protein	N/A	0.55	0.0268	0.0957	14.9608	14.8061	15.4052	15.4689	9.94089	9.65946
TGME49_206330	PHD-finger domain-containing protein	N/A	-1.54	0.000106	0.00147	11.1046	11.3698	10.0922	9.16021	11.9672	11.8779
TGME49_206340	hypothetical protein	N/A	0.36	0.189	0.359	10.9633	11.1814	11.5617	11.3101	13.749	14.0312
TGME49_206350	ER-retrevial receptor Ter1p, putative	N/A	-0.4	0.0948	0.226	10.8305	10.8093	10.3969	10.4395	14.2267	14.4612
TGME49_206360	peptidyl-tRNA hydrolase domain-containing protein	N/A	0.15	0.775	0.879	8.27295	9.33254	8.61643	9.38109	9.28666	8.94871
TGME49_206380	hypothetical protein	N/A	0.15	0.599	0.754	13.9156	13.9599	14.0254	14.1514	12.2984	11.8151
TGME49_206390	checkpoint protein HUS1, putative	N/A	0.1	0.647	0.792	14.7777	14.8751	14.9419	14.9143	11.671	11.7612
TGME49_206400	FAD binding domain of DNA photolyase domain-containing protein	N/A	0.48	0.0423	0.13	15.3553	15.5962	15.9921	15.9229	14.6825	14.717
TGME49_206415	myosin K	MyoK	-1.34	0.000739	0.00663	10.9581	10.7774	9.75237	9.28047	11.2131	10.447
TGME49_206430	formin FRM1	FRM1	1.27	0.0271	0.0968	8.95094	7.53971	9.50448	9.83582	9.79228	8.97362
TGME49_206440	cpw-wpc domain-containing protein	N/A	1.19	0.00131	0.0103	13.5084	14.0017	14.5715	15.2816	9.9565	10.1602
TGME49_206450	autophagy-related cysteine peptidase atg4, putative	N/A	-0.81	0.0432	0.132	14.4188	14.1103	13.612	13.3032	11.8353	10.9131
TGME49_206460	hypothetical protein	N/A	-0.04	0.863	0.931	12.3639	12.1679	12.3064	12.1438	11.8055	11.6993
TGME49_206470	pyruvate dehydrogenase complex subunit PDH-E3II	PDHE3II	0.15	0.512	0.688	11.0667	10.9971	11.1903	11.1794	13.3236	13.3127
TGME49_206480	succinate dehydrogenase subunit SDH23	SDH23	-0.61	0.107	0.244	11.9463	12.1447	11.7948	10.9518	10.7383	10.494
TGME49_206490	metacaspase MCA1	MCA1	0.06	0.908	0.955	5.92958	6.27505	5.9666	6.3719	7.26879	6.87226
TGME49_206500	hypothetical protein	N/A	-1.6	0.00518	0.0295	5.40581	5.2176	4.17156	3.17338	10.3347	9.8985
TGME49_206510	toxolysin TLN4	TLN4	3.01	9.16e-05	0.00131	4.65912	3.00733	5.58897	7.65491	13.6674	13.1005
TGME49_206520	hypothetical protein	N/A	0	1	NA	0	0	0	0	2.92926	0.620822
TGME49_206540	hypothetical protein	N/A	-0.62	0.383	0.572	3.25768	3.59264	2.91577	2.89088	12.2799	11.7238
TGME49_206550	hypothetical protein	N/A	-0.31	0.538	0.709	9.76061	10.6101	9.33057	10.3713	10.6483	10.9715
TGME49_206560	EF hand domain-containing protein	N/A	-0.72	0.17	0.335	4.88499	4.53157	3.81687	4.2209	10.6308	10.869
TGME49_206570	kinesin, putative	N/A	0.25	0.419	0.604	16.1284	15.587	16.2284	16.0266	11.4309	11.2824
TGME49_206580	formin FRM2	FRM2	-1.59	0.0033	0.021	6.46061	6.38331	4.17156	5.36134	10.7664	10.1217
TGME49_206590	calcium-dependent protein kinase CDPK2A	CDPK2A	0.49	0.198	0.37	6.57302	6.53184	6.59359	7.39101	13.7851	13.5872
TGME49_206600	sigma-70, region 3 protein	N/A	0.96	0.338	0.527	1.27942	3.59264	2.91577	4.33997	8.20809	7.91191
TGME49_206610	pyruvate dehydrogenase complex subunit PDH-E2	PDHE2	-1.04	0.0473	0.141	9.2437	8.95964	8.5625	7.30581	8.06186	8.37147
TGME49_206620	OST-HTH domain-containing protein	N/A	-0.71	0.024	0.0891	9.45796	9.72089	8.90746	8.86496	8.28309	8.0588
TGME49_206630	hypothetical protein	N/A	0.96	0.0297	0.103	5.78768	4.91498	6.05448	6.57976	12.5515	12.7555
TGME49_206640	hypothetical protein	N/A	0.41	0.194	0.365	8.09611	7.9272	8.2138	8.61046	11.3877	11.2242
TGME49_206650	zinc finger, c2h2 type domain-containing protein	N/A	2.25	0.0461	0.138	3.25768	3.00733	4.36729	5.79563	4.38209	3.85238
TGME49_206660	hypothetical protein	N/A	0.72	0.00684	0.0365	17.3387	17.3501	18.0651	18.058	12.141	11.7263
TGME49_206670	RNA recognition motif-containing protein	N/A	0.41	0.31	0.497	13.3843	13.3272	13.2188	14.1594	11.2981	10.903
TGME49_206680	hypothetical protein	N/A	0.05	0.904	0.952	7.80526	7.11683	7.86257	7.15157	10.2588	10.5479
TGME49_206690	glideosome-associated protein with multiple-membrane spans GAPM2B	GAPM2B	2.51	1.16e-05	0.000286	6.65705	4.86606	8.12863	8.68546	11.6755	11.7989
TGME49_206700	hypothetical protein	N/A	0	0.996	1	9.04751	9.82214	9.31879	9.64376	6.36532	6.77644
TGME49_206710	hypothetical protein	N/A	-0.51	0.241	0.42	6.717	6.07434	6.05448	5.75334	9.9084	9.92587
TGME49_207005	SAG-related sequence SRS48Q	SRS48Q	-0.6	0.361	0.549	6.41307	6.54744	5.87301	5.91551	5.13357	4.68575
TGME49_207010	SAG-related sequence SRS48K	SRS48K	1.28	0.108	0.246	4.88499	4.00785	5.73797	5.75334	5.23455	5.2106
TGME49_207015	SRS domain-containing protein	N/A	0.85	0.411	0.597	3.63451	5.00811	4.69354	5.75334	4.34643	5.12426
TGME49_207020	hypothetical protein	N/A	-1.09	0.117	0.259	3.63451	4.25586	3.67619	1.3809	11.4736	11.825
TGME49_207040	hypothetical protein	N/A	-4.7	0.00255	0.0173	2.40114	3.32946	0	0	11.7662	11.3071
TGME49_207050	hypothetical protein	N/A	1.32	0.607	NA	0	2.32863	2.30094	2.89088	2.01938	1.05346
TGME49_207060	ribonucleoside-diphosphate reductase small subunit	N/A	-0.29	0.226	0.403	16.2782	16.1633	16.0577	15.7873	13.6318	13.6816
TGME49_207065	hypothetical protein	N/A	-0.23	0.54	0.711	9.02396	9.03349	9.0849	8.44764	9.19566	9.26596
TGME49_207070	UDP-N-acetylglucosamine transferase subunit ALG14, putative	N/A	-0.86	0.0379	0.122	8.80664	8.48002	8.05951	7.45836	9.17929	8.81385
TGME49_207080	histone lysine acetyltransferase MYST-B	MYSTB	-0.64	0.0204	0.0799	10.5409	10.6984	9.93133	10.0387	11.4837	11.1884
TGME49_207100	hypothetical protein	N/A	-0.08	0.822	0.906	8.62035	8.66299	8.40424	8.70223	6.17517	5.88453
TGME49_207120	SUN-like protein SLP2	SLP2	0.25	0.462	0.645	10.7728	10.2622	10.5857	10.9611	10.7096	10.6147
TGME49_207140	SAG-related sequence SRS49B	SAG2X	-1.6	0.404	0.591	5.01805	3.59264	1.20743	3.7902	1.01295	0
TGME49_207150	SAG-related sequence SRS49C	SAG2D	0.31	0.409	0.595	9.04361	9.44507	9.73917	9.35305	4.30988	4.38521
TGME49_207160	SAG-related sequence SRS49D	SAG2C	-0.48	0.513	0.689	7.22352	7.18822	7.07194	6.34368	3.19287	1.65581
TGME49_207170	cytochrome b-c1 complex subunit 12	QCR12	0.44	0.354	0.543	5.30524	6.33019	6.61302	6.02619	11.5847	11.7098
TGME49_207180	indole-3-glycerol phosphate synthase domain-containing protein	N/A	-0.68	0.103	0.239	8.44236	8.24675	7.82974	7.48445	8.24729	7.73749
TGME49_207200	hypothetical protein	N/A	-0.74	0.213	0.387	7.47572	6.57814	6.63219	6.02619	7.89912	7.44868
TGME49_207210	hypothetical protein	N/A	-0.19	0.814	0.902	8.58861	10.4821	8.28214	10.3251	4.48405	4.3476
TGME49_207230	hypothetical protein	N/A	0.08	0.72	0.843	14.4054	14.321	14.5375	14.3494	10.5717	10.5649
TGME49_207240	hypothetical protein	N/A	0.04	0.893	0.948	14.2066	14.5635	14.4191	14.4543	9.23519	8.79126
TGME49_207250	electron-transfer-flavoprotein, alpha polypeptide	N/A	0.23	0.412	0.599	17.1808	17.3858	17.463	17.5693	11.8078	11.3799
TGME49_207350	hypothetical protein	N/A	0.25	0.749	0.862	6.86567	6.50013	6.40587	7.33477	3.19287	4.68575
TGME49_207370	golgi localizing protein GLP3	GLP3	0.4	0.161	0.323	11.2588	11.3393	11.4473	11.9183	12.5422	12.5362
TGME49_207390	AP-4 complex subunit mu, putative	N/A	-0.51	0.122	0.267	11.5097	11.3932	11.2309	10.5898	11.5471	11.57
TGME49_207400	splicing factor Yju2, putative	N/A	-0.24	0.444	0.628	11.0706	11.0991	11.0414	10.618	11.5378	11.9158
TGME49_207403	hypothetical protein	N/A	0	1	1	0	0	0	0	5.97957	5.8035
TGME49_207420	hypothetical protein	N/A	-0.54	0.32	0.508	9.68507	10.1594	9.95054	8.52508	11.1505	11.7033
TGME49_207430	ATP-dependent RNA helicase DDX1, putative	N/A	-0.19	0.496	0.675	9.90077	9.61013	9.66898	9.46863	11.716	11.8026
TGME49_207440	ribosomal protein RPS4	RPS4	-0.43	0.387	0.575	9.0397	8.60081	8.58727	8.21039	4.80621	3.85238
TGME49_207450	RNA-splicing ligase RtcB, putative	N/A	-2.89	0.144	0.299	2.74623	4.65189	2.30094	0	3.60862	2.78978
TGME49_207460	ras-related protein RAB5B	RAB5B	-1.02	0.0428	0.131	12.149	11.9291	11.5673	10.1589	13.034	13.4722
TGME49_207590	protein phosphatase PPM12	PPM12	1.8	0.0583	0.162	5.82448	2.32863	6.08262	7.11864	9.69109	9.9058
TGME49_207600	tubulin/FtsZ family, GTPase domain-containing protein	N/A	-0.43	0.36	0.549	7.94552	8.39636	7.41957	8.04498	7.13412	6.85896
TGME49_207610	rhoptry kinase family protein ROP36 (incomplete catalytic triad)	ROP36	0.77	0.388	0.576	5.19712	4.59299	5.84042	5.46977	5.40021	4.1865
TGME49_207620	pyridine nucleotide-disulfide oxidoreductase domain-containing protein	N/A	1.6	0.0986	0.232	3.0245	0	2.91577	3.7902	9.51459	9.98525
TGME49_207630	peptidyl-tRNA hydrolase domain-containing protein	N/A	0	1	NA	0	0	0	0	2.82948	2.40654
TGME49_207640	isoleucyl-tRNA synthetase family protein	N/A	-0.14	0.857	0.927	2.40114	5.17806	3.81687	4.64758	11.6676	11.4457
TGME49_207650	OTU domain-containing protein OTUD1A	OTUD1A	1.09	0.000233	0.00269	17.9236	18.181	18.9122	19.3597	11.4969	11.71
TGME49_207665	kinesin motor domain-containing protein	N/A	-0.17	0.76	0.868	8.36951	9.03902	8.40981	8.74061	5.40021	6.4875
TGME49_207680	suppressor of kinetochore protein 1	SKP1	-0.57	0.218	0.394	6.55123	7.64495	6.40587	6.84431	11.8313	11.9465
TGME49_207690	programmed cell death 5 protein	PDCD5	0.33	0.203	0.376	11.9915	12.2619	12.518	12.3999	10.675	10.8067
TGME49_207700	rhoptry kinase family protein ROP22 (incomplete catalytic triad)	ROP22	0.28	0.664	0.805	6.4838	6.68071	7.04359	6.65058	4.83223	5.8035
TGME49_207710	phosphatidylinositol synthase	PIS	0.45	0.0445	0.135	12.6484	12.7405	13.0958	13.1968	12.2622	12.3317
TGME49_207720	Nrap domain-containing protein	N/A	-0.67	0.0914	0.22	10.0921	9.65041	9.56558	8.75139	11.2398	11.3609
TGME49_207730	hypothetical protein	N/A	0.89	0.0119	0.0542	18.4182	18.0625	19.0973	19.1946	12.9402	12.1979
TGME49_207740	hypothetical protein	N/A	3.98	0.0184	0.074	9.27727	3.46704	11.6815	12.6979	9.39534	9.21596
TGME49_207750	glycosyltransferase family 17 protein	N/A	0.07	0.822	0.906	8.60985	8.36149	8.42638	8.68546	10.646	10.8527
TGME49_207760	DnaJ C terminal region domain-containing protein	N/A	-1.03	0.0216	0.0824	8.52853	8.16821	7.64391	6.92271	8.87904	8.5518
TGME49_207770	PCI domain-containing protein	N/A	-0.63	0.0716	0.187	7.75848	7.9092	7.4523	6.92271	11.6876	12.0102
TGME49_207780	hypothetical protein	N/A	1.44	9.55e-05	0.00137	14.9409	15.3943	16.212	16.9385	9.00301	9.15467
TGME49_207790	enkurin, putative	N/A	1.06	0.0371	0.12	6.26026	6.50013	6.98515	7.72223	7.99435	8.46884
TGME49_207800	hypothetical protein	N/A	-0.44	0.257	0.44	9.31979	9.4962	9.31583	8.51878	11.012	11.2771
TGME49_207820	mitogen-activated protein kinase MAPK2	MAPK2	0.21	0.358	0.546	13.7588	13.6905	13.8456	14.0195	12.1877	12.2437
TGME49_207830	MORN repeat-containing protein	N/A	1.05	2.24e-05	0.000468	12.5391	12.3424	13.4232	13.5561	12.4541	12.6299
TGME49_207840	ribosomal protein RPS17	RPS17	-0.07	0.846	0.921	8.97978	8.79625	8.90352	8.73519	10.6515	11.256
TGME49_207900	transcription initiation factor TFIIIB	TFIIIB	0.62	0.0997	0.233	9.19534	9.69486	9.7011	10.3887	12.368	12.421
TGME49_207910	calcium/proton exchanger CAX	CAX	0.63	0.0661	0.176	9.76535	9.84599	10.0801	10.719	10.9962	11.1623
TGME49_207920	hypothetical protein	N/A	-0.28	0.352	0.541	10.2029	10.0376	9.94097	9.73893	7.26879	7.51804
TGME49_207930	phosphatidylethanolamine-binding protein	N/A	-0.34	0.351	0.54	11.1669	11.6318	11.3193	10.7834	14.0995	14.568
TGME49_207940	ribosomal protein S9, putative	N/A	-1.1	0.054	0.154	9.05139	8.45129	8.23276	6.78258	9.20067	9.1341
TGME49_207950	hypothetical protein	N/A	-0.6	0.115	0.258	10.5965	11.0985	10.5955	9.86093	13.8548	14.0296
TGME49_207955	hypothetical protein	N/A	1.46	0.000114	0.00155	12.6835	13.2393	14.0754	14.7418	7.77721	8.05297
TGME49_207960	vacuolar fusion protein CCZ1, putative	N/A	-0.47	0.0773	0.197	10.077	9.95965	9.60493	9.49131	11.6451	11.4136
TGME49_207965	FAD-dependent oxidoreductase, putative	N/A	0.88	0.0152	0.0643	18.8581	18.4424	19.4051	19.6816	13.0571	12.3519
TGME49_207970	HEAT repeat-containing protein	N/A	0.24	0.539	0.71	9.46381	9.08784	9.71914	9.29528	5.85823	6.25333
TGME49_207980	PIG-P protein	N/A	-0.33	0.522	0.695	6.57302	6.21771	5.90489	6.25555	8.21799	7.74113
TGME49_207990	ribosomal RNA large subunit methyltransferase J protein	N/A	-0.43	0.453	0.636	4.18022	5.59316	4.69354	4.64758	10.7898	10.8896
TGME49_208010	syntaxin-19	STX19	0.02	0.954	0.981	12.6195	13.0075	12.8581	12.8287	13.3092	13.4494
TGME49_208020	AP2 domain transcription factor AP2Ib-1	AP2IB1	-1.32	0.149	0.306	5.3564	4.76295	3.52031	4.09112	5.27304	5.98594
TGME49_208030	microneme protein MIC4	MIC4	0.21	0.657	0.8	6.08933	6.63764	5.87301	7.10189	15.3297	15.1327
TGME49_208040	aldo-keto reductase	N/A	2.37	0.0023	0.0159	1.94666	3.32946	4.76475	5.30391	8.28544	8.01748
TGME49_208050	ABC transporter, putative	N/A	-0.49	0.652	0.796	4.3912	4.17783	3.52031	4.09112	4.30988	3.95599
TGME49_208070	inositol polyphosphate kinase	N/A	-1.48	0.000251	0.00284	10.1906	10.1376	8.71861	8.64556	9.55323	8.68971
TGME49_208090	5-formyltetrahydrofolate cyclo-ligase	N/A	-0.76	0.0472	0.14	9.61064	9.82214	9.24911	8.60453	8.75534	8.46445
TGME49_208200	PHD-finger domain-containing protein	N/A	-1	0.00994	0.0476	8.23245	8.94204	7.77904	7.51007	11.7086	11.9775
TGME49_208300	hypothetical protein	N/A	0.41	0.416	0.602	6.33869	6.40059	6.42797	7.06779	7.98858	7.67053
TGME49_208310	FHA domain-containing protein	N/A	-0.91	0.0109	0.0508	10.1675	9.98278	9.44881	8.82979	11.3036	11.6516
TGME49_208320	polynucleotide kinase 3 phosphatase	N/A	0.38	0.477	0.657	8.62035	9.91675	9.31583	10.1529	10.6103	10.7493
TGME49_208330	DUF2981 domain-containing protein	N/A	0.44	0.123	0.268	15.799	16.2646	16.4926	16.4809	9.84753	9.6964
TGME49_208340	PH domain-containing protein	N/A	0.92	0.00249	0.017	9.73184	9.71053	10.3884	10.8601	11.206	11.0544
TGME49_208350	RNA-binding protein, putative	N/A	0.84	0.0033	0.021	13.9357	13.7969	14.6657	14.7397	12.2175	12.6797
TGME49_208360	hypothetical protein	N/A	-0.33	0.347	0.536	9.80272	9.31897	9.4569	9.00669	10.8303	10.6876
TGME49_208370	dense granule protein GRA46	GRA46	1.13	0.00384	0.0235	7.26428	7.49214	8.0309	8.87978	15.2019	15.5142
TGME49_208380	hypothetical protein	N/A	4.1	7.05e-07	3.98e-05	9.24709	6.21771	11.7609	12.9893	11.1998	11.1954
TGME49_208390	F-actin-capping protein subunit alpha, putative	N/A	2.22	0.0103	0.049	6.3887	3.70817	7.88671	7.6777	8.59177	7.66672
TGME49_208400	hypothetical protein	N/A	0.5	0.248	0.429	5.30524	5.78958	6.13732	5.99023	12.3881	11.7917
TGME49_208410	transporter, putative	N/A	1.85	0.191	0.362	1.94666	1.59055	0	4.2209	7.72956	7.95319
TGME49_208420	signaling linker factor SLF	SLF	0.32	0.258	0.44	15.2102	14.9575	15.2794	15.5372	13.0562	12.7001
TGME49_208430	serine proteinase inhibitor PI-2, putative	N/A	0.58	0.221	0.397	6.50663	5.86621	7.12703	6.28553	11.0422	11.4468
TGME49_208440	ATP synthase-associated protein	N/A	-0.2	0.653	0.796	6.05876	5.53175	5.46616	5.75334	10.7802	11.2585
TGME49_208450	protease inhibitor PI2	PI2	4.13	6.14e-15	1.61e-11	6.82991	6.27505	9.78485	11.2448	17.656	17.942
TGME49_208490	GTP-binding protein, putative	N/A	-1.24	0.00318	0.0205	10.4816	9.90772	9.32764	8.51878	10.588	10.8024
TGME49_208500	protein phosphatase PPM4	PPM4	-0.83	0.0029	0.019	8.90872	9.07175	8.31809	7.98229	13.2937	13.3726
TGME49_208510	hypothetical protein	N/A	-0.05	0.922	0.963	10.6653	10.4092	9.77626	10.9773	7.5175	7.23357
TGME49_208530	nicotinate phosphoribosyltransferase	N/A	0.34	0.205	0.378	13.865	13.7738	14.1934	14.1225	12.354	11.9604
TGME49_208540	DEAD/DEAH box helicase domain-containing protein	N/A	-1.57	0.00659	0.0356	8.92576	8.00834	7.49481	6.12898	9.95945	9.98907
TGME49_208550	hypothetical protein	N/A	2.7	0.134	0.285	0	0	1.8554	0	13.9643	14.2505
TGME49_208560	carrier superfamily protein	N/A	-0.17	0.752	0.863	5.78768	4.70849	5.07603	5.24409	9.70699	9.72418
TGME49_208570	ubiquitin conjugating enzyme E2, putative	N/A	3.46	1.66e-06	7.04e-05	5.71113	3.17737	8.40981	8.30856	9.24006	9.16281
TGME49_208580	DNA ligase 1, putative	N/A	-0.34	0.351	0.54	11.2049	11.2408	10.7427	11.0169	8.23515	7.50101
TGME49_208590	vacuolar ATP synthase subunit 54kD, putative	N/A	-0.8	0.00583	0.0324	9.08969	9.07713	8.46964	8.07961	12.738	12.8934
TGME49_208710	DNA/RNA non-specific endonuclease	N/A	2.48	0.108	0.245	6.31302	0	6.92424	8.30856	5.80668	5.14633
TGME49_208718	protein tyrosine phosphatase type IVA A, putative	N/A	0.37	0.219	0.395	13.2136	13.1697	13.2881	13.7855	11.6835	11.4644
TGME49_208722	hypothetical protein	N/A	0.18	0.587	0.747	11.4869	11.2978	11.3377	11.783	9.43195	8.98285
TGME49_208730	microneme adhesive repeat protein MCP4	MCP4	2.42	0.00402	0.0243	5.5881	5.81558	5.80707	8.95166	10.8523	10.9227
TGME49_208740	microneme adhesive repeat protein MCP3	MCP3	3.06	0.00423	0.0252	2.40114	2.32863	5.46616	4.73709	5.0694	5.2106
TGME49_208750	RWD domain-containing protein	N/A	-0.69	0.0826	0.206	12.2744	12.5371	12.1102	11.1854	11.3852	11.6143
TGME49_208760	hypothetical protein	N/A	4.18	0.00299	0.0195	8.83397	4.59299	11.4172	12.5394	8.52755	8.07615
TGME49_208770	hypothetical protein	N/A	4	4e-07	2.65e-05	10.8042	8.02515	13.2405	14.4878	10.5365	10.7343
TGME49_208780	ubiquitin-conjugating enzyme subfamily protein	N/A	-0.79	0.0746	0.192	8.15509	8.83808	8.10824	7.26124	11.489	11.761
TGME49_208790	MC family transporter, putative	N/A	-0.29	0.446	0.63	7.0787	7.81569	7.04359	7.36317	11.9912	12.0359
TGME49_208800	mediator complex subunit MED18	MED18	0.05	0.888	0.945	11.6347	12.3599	11.9341	12.2459	11.0681	11.5432
TGME49_208810	peptidyl-prolyl cis-trans isomerase, putative	N/A	-0.68	0.142	0.296	15.5868	15.2288	15.1387	14.1906	10.1799	9.34086
TGME49_208820	1-deoxy-D-xylulose-5-phosphate synthase	N/A	0.26	0.629	0.78	10.7562	11.881	11.0645	12.1164	9.65055	10.0525
TGME49_208830	dense granule protein GRA16	GRA16	-3.12	0.062	0.169	0	2.32863	0	0	10.9998	10.8183
TGME49_208842	DEAD/DEAH box helicase domain-containing protein	N/A	1.74	0.245	0.425	2.74623	0	3.94503	2.07335	6.40918	6.68138
TGME49_208850	SAG-related sequence SRS11	SAG2B	0.91	0.026	0.0937	7.30391	7.34817	8.08755	8.36581	7.37436	7.76629
TGME49_208910	hypothetical protein	N/A	2.4	0.00997	0.0477	4.88499	2.59194	6.4712	6.4534	7.33396	6.38911
TGME49_208970	RNA recognition motif-containing protein	N/A	-0.03	0.909	0.955	14.8923	15.1271	14.9418	15.0318	12.1424	12.0381
TGME49_208980	hypothetical protein	N/A	1.46	0.0808	0.202	2.40114	3.00733	2.64086	4.82137	9.93415	9.95039
TGME49_208990	hypothetical protein	N/A	-0.23	0.506	0.684	11.3492	11.7053	11.5729	10.9796	8.85069	8.61451
TGME49_209000	HECT-domain (ubiquitin-transferase) domain-containing protein	N/A	-0.02	0.949	0.979	14.6675	14.3848	14.1838	14.7804	11.6955	11.4531
TGME49_209005	hypothetical protein	N/A	-1.72	0.222	0.397	3.93301	4.70849	1.20743	3.40951	4.54823	5.18949
TGME49_209010	elongation factor TS protein	N/A	0.26	0.36	0.549	10.4032	10.5999	10.6076	10.9031	9.34767	9.33486
TGME49_209020	hypothetical protein	N/A	0.44	0.193	0.365	10.4874	10.0555	10.4559	10.9611	11.1029	10.9895
TGME49_209030	actin ACT1	ACT1	0.54	0.0969	0.229	14.7291	15.1817	15.3171	15.6857	17.6404	17.9933
TGME49_209050	Tyrosine kinase-like (TKL) protein	TKL5	5.31	2.58e-07	1.97e-05	2.40114	0	5.73797	6.57976	9.25336	8.68406
TGME49_209060	thrombospondin type 1 domain-containing protein	N/A	0.55	0.499	0.676	5.08025	5.78958	5.37806	6.47957	5.63997	4.95949
TGME49_209070	hypothetical protein	N/A	-0.21	0.381	0.569	13.3474	13.4618	13.1333	13.2598	12.2639	12.4461
TGME49_209080	transport protein particle (trapp) component, bet3 protein	N/A	-0.29	0.209	0.383	13.0432	12.8739	12.7047	12.6331	11.5997	11.6895
TGME49_209090	proteasome maturation factor ump1 protein	N/A	-0.96	0.0147	0.0628	10.4569	10.405	9.84975	8.95166	10.6178	10.5244
TGME49_209095	hypothetical protein	N/A	-0.41	0.68	0.818	4.3912	5.09559	3.81687	4.82137	4.75274	4.38521
TGME49_209100	PUB domain-containing protein	N/A	-0.68	0.0963	0.228	8.53965	7.93315	7.79614	7.33477	9.58321	9.53845
TGME49_209108	mRNA-decapping enzyme subunit 1, putative	N/A	-1.42	1.23e-06	5.74e-05	9.04361	9.20803	7.69949	7.74398	10.4903	10.4127
TGME49_209120	PAT complex subunit Asterix, putative	N/A	-0.18	0.697	0.828	6.59449	6.11677	6.21565	6.16168	8.28309	8.41757
TGME49_209130	regulator of chromosome condensation (RCC1) repeat-containing protein	N/A	0.01	0.992	1	6.4838	6.19808	5.84042	6.73991	4.60968	2.67299
TGME49_209140	anti-silencing protein, ASF1 family protein	N/A	-0.4	0.576	0.738	5.74991	6.6082	5.23493	6.28553	6.3742	6.34207
TGME49_209150	non-proton pumping type-II NADH dehydrogenase I	NDH2-I	-0.09	0.745	0.86	10.4874	10.9509	10.5991	10.6885	12.5028	12.4867
TGME49_209160	myristoyl CoA:protein N-myristoyltransferase	NMT	-0.28	0.34	0.529	11.8244	11.8706	11.7922	11.3119	10.8973	10.9014
TGME49_209170	hypothetical protein	N/A	4	0.0489	0.143	5.30524	0	7.2685	8.855	7.97988	7.83585
TGME49_209180	PAN domain-containing protein	N/A	0.14	0.702	0.832	11.8352	11.0724	11.6495	11.6322	6.95039	7.0467
TGME49_209190	ABC transporter transmembrane region domain-containing protein	N/A	0.1	0.828	0.909	5.96298	4.9623	5.80707	5.41657	11.1294	10.9937
TGME49_209200	hypothetical protein	N/A	0.81	0.0342	0.113	9.38284	8.891	10.0957	9.82565	8.31802	7.82563
TGME49_209210	KH domain-containing protein	N/A	-0.25	0.468	0.652	12.7926	12.7269	12.1068	12.8195	11.9113	11.6046
TGME49_209240	RNA methyltransferase	N/A	1.8	0.189	0.36	1.94666	0	2.64086	2.07335	7.65136	7.95632
TGME49_209250	hypothetical protein	N/A	0.56	0.0757	0.194	9.8256	9.61938	10.0213	10.5174	12.8916	12.6341
TGME49_209260	cytochrome c oxidase subunit COX5b	COX5b	-0.19	0.647	0.792	9.87906	10.4922	9.93326	10.12	10.5498	11.3077
TGME49_209270	zinc finger (CCCH type) motif-containing protein	N/A	-1.21	0.00971	0.0469	10.1923	9.34151	8.72309	8.52508	8.91751	8.23393
TGME49_209280	FAM76 domain-containing protein	N/A	0.08	0.832	0.911	11.2797	11.2716	10.9641	11.6604	11.2174	10.7778
TGME49_209290	ribosomal protein RPS28	RPS28	-0.34	0.285	0.469	12.021	12.4034	12.0162	11.7417	13.1497	13.567
TGME49_209300	WD domain, G-beta repeat-containing protein	N/A	-0.59	0.163	0.325	8.10361	9.06635	7.87871	8.23365	11.692	11.5305
TGME49_209420	hypothetical protein	N/A	-0.86	0.0239	0.0888	12.1467	12.3064	11.7179	10.9139	12.8372	13.2374
TGME49_209430	40S ribosomal protein S4, putative	N/A	-0.61	0.365	0.553	8.19077	8.14789	8.24526	6.22493	9.12245	9.54158
TGME49_209440	hypothetical protein	N/A	-0.11	0.764	0.871	13.2695	13.1268	12.7754	13.3479	10.3595	9.71775
TGME49_209450	TLD protein	N/A	0.31	0.298	0.485	14.8014	14.6947	14.7982	15.2886	13.0589	12.7699
TGME49_209460	hypothetical protein	N/A	0	0.996	1	10.391	10.6826	10.8158	10.2067	9.24249	9.55608
TGME49_209470	hypothetical protein	N/A	0.35	0.231	0.409	19.8738	19.9957	20.3392	20.2343	14.13	13.6071
TGME49_209490	hypothetical protein	N/A	0.19	0.633	0.782	11.0773	11.9179	11.5172	11.9538	13.3661	13.7506
TGME49_209500	hypothetical protein	N/A	-0.52	0.161	0.322	10.7845	10.6027	10.4612	9.83328	11.6737	11.1977
TGME49_209510	hypothetical protein	N/A	0	0.997	1	10.2476	11.3807	10.4205	11.2963	8.53944	8.96277
TGME49_209515	hypothetical protein	N/A	0.71	0.0881	0.215	10.215	10.0905	11.0645	10.6239	5.34707	4.38521
TGME49_209520	WD domain, G-beta repeat-containing protein	N/A	0.23	0.531	0.703	9.23689	9.13764	9.21773	9.59372	11.5906	10.9516
TGME49_209530	hypothetical protein	N/A	0.17	0.573	0.737	10.7152	10.5553	10.9228	10.6828	9.89997	10.2381
TGME49_209540	hypothetical protein	N/A	0.46	0.167	0.331	9.99459	9.69311	10.3058	10.3269	8.55319	8.05297
TGME49_209550	hypothetical protein	N/A	-0.03	0.92	0.962	8.89581	9.07175	8.95391	8.95166	10.2419	9.89687
TGME49_209560	hypothetical protein	N/A	0.72	0.0461	0.138	11.0406	11.1726	12.0433	11.5735	8.4645	7.83245
TGME49_209570	suppressor of mitotic defects protein	XPMC2	0.25	0.518	0.693	7.57626	8.25152	8.08059	8.32309	10.1026	10.1126
TGME49_209580	RNA methylase family UPF0020 protein	N/A	1.12	0.00236	0.0162	6.91769	6.91519	7.65332	8.33747	11.5375	11.6359
TGME49_209583	hypothetical protein	N/A	1.07	0.00131	0.0103	13.8839	14.3333	14.8947	15.4513	9.06053	9.15331
TGME49_209585	hypothetical protein	N/A	1.12	0.000264	0.00295	13.8529	13.8377	14.7505	15.1428	8.29716	8.74681
TGME49_209590	hypothetical protein	N/A	1.03	0.000452	0.00451	15.1469	14.9771	15.8886	16.2787	8.91143	8.57233
TGME49_209600	hypothetical protein	N/A	-0.98	0.0105	0.0495	9.45209	9.86479	9.03896	8.24132	13.5525	13.76
TGME49_209610	oocyst wall protein OWP2	OWP2	1.38	6.33e-05	0.00101	18.8239	18.9724	19.8658	20.603	13.4081	13.2083
TGME49_209620	aspartyl protease ASP4	ASP4	1.09	0.0011	0.00905	14.7429	15.1501	15.7242	16.3191	8.80545	8.79651
TGME49_209630	coiled-coil domain-containing protein	N/A	-0.92	0.0162	0.0673	9.95156	9.93317	9.38244	8.53135	10.8865	10.8515
TGME49_209640	hypothetical protein	N/A	-0.88	0.128	0.275	9.43435	9.3834	9.15615	7.39101	11.1049	11.5278
TGME49_209650	telomerase reverse transcriptase, putative	N/A	-0.49	0.254	0.436	11.8959	11.4549	11.1484	11.2581	6.34739	5.29206
TGME49_209680	hypothetical protein	N/A	-0.82	0.0494	0.145	10.2459	9.87718	9.64086	8.71881	10.6579	10.539
TGME49_209690	small nuclear ribonucleoprotein	N/A	-0.44	0.272	0.455	7.23723	7.63038	7.05783	6.96037	11.3522	12.0561
TGME49_209700	hypothetical protein	N/A	0.43	0.186	0.355	13.2996	13.8954	13.9485	14.1642	12.7281	12.9696
TGME49_209705	hypothetical protein	N/A	1.32	0.000231	0.00268	13.582	13.6352	14.4793	15.2625	7.56092	7.79452
TGME49_209710	ribosomal protein RPL28	RPl28	-0.43	0.232	0.409	12.0397	12.283	12.0681	11.3182	10.451	10.3874
TGME49_209720	DUF4149 domain-containing protein	N/A	-0.09	0.776	0.879	14.8976	15.3167	15.2005	14.8395	13.9703	14.3331
TGME49_209730	hypothetical protein	N/A	0.27	0.372	0.561	10.5284	10.3292	10.8693	10.5047	6.99136	6.94333
TGME49_209740	hypothetical protein	N/A	-0.33	0.265	0.448	13.0976	13.431	13.1331	12.7255	9.41269	9.50253
TGME49_209755	cyst matrix protein MAG2	MAG2	0.96	0.0349	0.115	7.31689	6.76318	8.22015	7.78653	7.66951	7.71552
TGME49_209770	helicase, putative	N/A	-1.35	0.00877	0.0436	8.47745	8.07443	7.2928	6.47957	5.76677	5.59461
TGME49_209790	radical SAM domain-containing protein	N/A	-0.43	0.479	0.659	7.70026	7.38336	7.57624	6.4534	6.99136	6.38911
TGME49_209800	formate/nitrite transporter FNT1	FNT1	-0.06	0.957	0.983	3.45836	0	1.8554	2.89088	9.01015	9.42226
TGME49_209810	hypothetical protein	N/A	3.53	0.018	0.0727	7.89451	3.32946	9.68283	10.9738	10.1856	10.231
TGME49_209820	syntaxin 1	STX1	-0.99	0.0165	0.0682	7.53244	7.30294	6.5739	6.3719	8.40292	8.50985
TGME49_209830	leucine-rich repeat-containing protein LRRC45, putative	LLRC45	-0.74	0.0795	0.2	8.85636	9.77157	8.46964	8.79894	10.7894	10.6838
TGME49_209850	RNA recognition motif-containing protein	N/A	-1.74	0.0726	0.189	3.25768	4.00785	2.30094	2.07335	7.54134	8.09045
TGME49_209860	SRP40, C-terminal domain-containing protein	N/A	-0.25	0.73	0.85	5.86037	7.11683	5.62768	6.88404	7.99435	8.52888
TGME49_209870	HAD hydrolase, family IIA protein	N/A	-0.77	0.0503	0.147	7.12369	7.87252	6.79413	6.78258	11.219	11.3761
TGME49_209890	hypothetical protein	ICAP4	0.8	0.00117	0.00945	15.7063	15.832	16.4323	16.6979	13.2055	13.3176
TGME49_209900	hypothetical protein	N/A	0.15	0.638	0.785	11.1543	11.4325	11.5127	11.3829	10.0002	10.5031
TGME49_209910	histone H2Bv	N/A	0.19	0.399	0.587	17.8428	17.9657	18.0566	18.1354	14.3707	14.5105
TGME49_209920	PAN domain-containing protein	N/A	3.53	1.38e-05	0.000328	6.95136	5.2176	8.05951	10.6166	13.0937	12.9187
TGME49_209930	hypothetical protein	N/A	3.7	0.0045	0.0265	10.8203	7.06359	12.8975	14.0998	10.2291	10.3319
TGME49_209940	transporter/permease protein	N/A	0.91	0.0139	0.0604	6.82991	6.46771	7.2807	7.79698	11.7357	11.4973
TGME49_209945	hypothetical protein	N/A	0.57	0.407	0.593	8.41848	9.63041	8.83072	10.283	5.72573	6.77644
TGME49_209950	thioredoxin, putative	N/A	0	0.999	1	12.1927	12.1344	12.3709	11.9225	13.7248	13.5954
TGME49_209960	glycosyltransferase	N/A	-1.06	0.00366	0.0226	8.57787	8.5591	7.69037	7.32037	11.1036	10.571
TGME49_209970	Spc97 / Spc98 family protein	N/A	-0.75	0.0613	0.168	10.0865	9.92871	9.35962	9.16425	9.30303	8.49703
TGME49_209985	rhoptry protein ROP42	ROP42	4.38	0.00597	0.0329	7.27761	2.59194	9.40211	11.369	10.5537	10.5201
TGME49_210095	rhoptry protein ROP43	ROP43	4.1	0.0093	0.0455	7.18158	2.32863	9.42702	10.8539	10.2772	10.3499
TGME49_210210	hypothetical protein	N/A	0.59	0.0907	0.219	17.8126	17.4968	18.2721	18.23	12.3818	11.6581
TGME49_210230	pseudouridine synthase, putative	N/A	0.49	0.0294	0.103	14.3467	14.2798	14.7699	14.836	13.0833	13.2337
TGME49_210255	mitochondrial import receptor subunit TOM7	TOM7	0.01	0.985	0.998	10.8596	10.9684	10.8733	10.9692	12.8809	13.5163
TGME49_210260	NAD-dependent glycerol-3-phosphate dehydrogenase	N/A	-0.83	0.0237	0.0883	16.0816	16.2482	15.6558	14.9402	11.1245	10.6595
TGME49_210270	hypothetical protein	N/A	0.18	0.507	0.684	8.91726	8.95087	9.22721	8.98858	11.9042	11.7719
TGME49_210280	aurora-related kinase ARK1	ARK1	0.6	0.0627	0.17	15.0435	14.5371	15.3083	15.5025	9.69641	9.32401
TGME49_210300	zinc finger protein, putative	N/A	4.67	0.00281	0.0186	1.27942	0	3.81687	4.2209	7.75358	7.46194
TGME49_210310	hypothetical protein	N/A	2.99	0.0095	0.0461	1.94666	0	2.64086	3.94849	13.6449	13.385
TGME49_210320	SAG-related sequence SRS37A	SRS37A	-0.44	0.802	NA	2.74623	2.32863	2.30094	2.07335	2.34259	4.22849
TGME49_210330	SAG-related sequence SRS37B	SRS37B	-0.93	0.597	0.753	4.18022	4.53157	3.14658	3.7902	2.19002	0
TGME49_210345	hypothetical protein	N/A	-1.15	0.0128	0.0571	9.21972	9.02238	8.11506	7.81765	5.51707	4.62416
TGME49_210360	DEAD (Asp-Glu-Ala-Asp) box polypeptide 41 family protein	N/A	0.32	0.255	0.437	10.1294	10.3201	10.3643	10.7066	11.9219	11.9208
TGME49_210370	rhoptry protein ROP54	ROP54	0.17	0.7	0.83	8.51171	9.3834	8.98033	9.35658	9.31691	9.4569
TGME49_210380	transmembrane protein 184, putative	N/A	0.58	0.0302	0.104	13.6206	13.3535	13.9473	14.1922	12.2781	12.0796
TGME49_210390	WD domain, G-beta repeat-containing protein	N/A	-0.89	0.0664	0.177	8.53965	8.37467	7.98691	6.97884	7.96819	7.94692
TGME49_210400	hypothetical protein	N/A	-0.23	0.615	0.768	14.5984	13.9666	14.3306	13.8038	9.23031	8.27709
TGME49_210408	HMG (high mobility group) box domain-containing protein	N/A	0.13	0.597	0.753	18.0173	18.2922	18.344	18.2385	13.6377	13.5087
TGME49_210412	hypothetical protein	N/A	3.17	7.8e-05	0.00118	7.15292	4.70849	8.80138	10.0365	8.37443	8.80694
TGME49_210420	hypothetical protein	N/A	2.07	0.0679	0.18	4.18022	0	4.83261	5.41657	8.52357	8.46665
TGME49_210430	DnaJ domain-containing protein	N/A	-0.48	0.139	0.291	14.8809	14.4992	14.0772	14.347	10.8646	10.3588
TGME49_210440	polynucleotide adenylyltransferase	N/A	-0.8	0.0871	0.213	11.5286	11.0231	10.9678	9.80769	10.7781	10.9516
TGME49_210450	hypothetical protein	N/A	-0.22	0.823	0.906	4.28956	5.17806	4.53962	4.64758	3.54712	4.09867
TGME49_210490	hypothetical protein	N/A	2.84	0.399	NA	0	0	0	2.07335	3.60862	3.85238
TGME49_210600	KRUF family protein	N/A	2.13	0.0381	0.122	3.0245	3.70817	4.83261	5.87664	6.32924	4.95949
TGME49_210678	OTU domain-containing protein OTUD1D	OTUD1D	4.14	0.00932	0.0456	8.15509	4.25586	9.91967	12.089	6.65488	4.59235
TGME49_210682	hypothetical protein	N/A	1.36	1.64e-05	0.000364	9.71479	9.7782	10.8053	11.3505	21.151	21.4401
TGME49_210690	ribosomal protein RPS6	RPS6	0.57	0.114	0.255	11.0278	10.5725	11.5871	11.1471	15.2758	15.8002
TGME49_210700	VPS13 domain-containing protein	N/A	0.18	0.645	0.79	10.7053	10.8539	10.64	11.2246	12.0559	11.3624
TGME49_210715	hypothetical protein	N/A	-3.92	0.415	NA	0	3.17737	0	0	0	0
TGME49_210730	ATP-dependent protease ATPase subunit ClpY, putative	ClpY	-0.4	0.175	0.342	8.35701	8.38772	8.12863	7.79698	12.1381	12.3364
TGME49_210740	hypothetical protein	N/A	-0.78	0.164	0.326	9.69256	10.2227	9.56309	8.7133	8.87122	10.1602
TGME49_210750	Ferredoxin-fold anticodon binding domain-containing protein	N/A	0.2	0.449	0.633	12.076	12.4098	12.5014	12.4003	9.98576	10.0978
TGME49_210760	glutamine amidotransferase-related, putative	N/A	-0.12	0.685	0.821	13.6945	13.4607	13.6795	13.2081	12.7168	12.8726
TGME49_210770	hypothetical protein	N/A	1.32	0.000853	0.00741	15.5932	15.9788	16.5922	17.5044	9.78897	9.6186
TGME49_210778	hemimethylated DNA binding domain-containing protein	N/A	-0.75	0.0408	0.128	10.7491	10.8986	10.4149	9.61748	11.669	11.4727
TGME49_210781	ubiquitin carboxyl-terminal hydrolase	N/A	0.13	0.8	0.895	9.07449	8.4388	8.58727	9.19617	7.20552	6.28352
TGME49_210783	hypothetical protein	N/A	0.91	0.32	0.508	5.86037	4.09534	6.13732	6.09552	3.66759	3.79764
TGME49_210787	Erv1 / Alr family protein	N/A	5.5	0.00334	0.0212	0	0	1.8554	4.2209	7.02558	6.7835
TGME49_210790	dihydroorotate dehydrogenase	DHODH	-0.07	0.874	0.937	4.48614	5.09559	5.01891	4.64758	12.5801	12.6079
TGME49_210800	activator of hsp90 ATPase, putative	N/A	-0.9	0.0818	0.204	9.02396	9.24437	8.76277	7.39101	10.3192	10.6451
TGME49_210810	conoid associated protein CAP1	CAP1	-0.57	0.148	0.305	14.4423	14.62	14.2731	13.579	12.2868	12.9556
TGME49_210815	hypothetical protein	N/A	-0.7	0.819	NA	3.0245	3.70817	3.67619	0	0	0
TGME49_210820	transporter, putative	N/A	4.79	0.00115	0.00933	1.94666	0	3.94503	5.8367	6.77374	6.25333
TGME49_210830	RIO1 family protein	N/A	-1.19	0.592	0.75	1.27942	0	0	0	7.25443	6.94333
TGME49_210840	arginyl-tRNA synthetase family protein	N/A	4.36	0.00556	0.0313	0	1.00419	1.8554	4.55215	10.646	10.9347
TGME49_210950	oocyst wall protein	N/A	3.73	6.99e-06	0.000196	12.1634	9.14535	14.3105	15.552	11.4224	10.8084
TGME49_210960	replication factor C subunit 4, putative	N/A	0.33	0.78	0.882	3.0245	1.59055	3.34551	1.3809	7.48507	6.96212
TGME49_210970	hypothetical protein	N/A	1.67	0.292	NA	2.74623	2.32863	3.81687	4.2209	1.01295	2.25225
TGME49_210980	alternative splicing type 3 and, putative	N/A	0.06	0.811	0.901	10.7004	10.6949	10.7438	10.7716	11.3645	11.5562
TGME49_211010	SANT/Myb domain-containing protein	N/A	-0.09	0.728	0.849	12.2594	12.0531	12.0221	12.1117	12.0428	11.7414
TGME49_211020	polyadenylate-binding protein PABPN	PABPN	0.41	0.135	0.286	11.3524	11.7088	11.8865	12.0155	12.1322	12.295
TGME49_211030	hypothetical protein	N/A	-0.37	0.497	0.675	7.00044	7.08512	6.36061	6.94167	5.13357	5.29206
TGME49_211040	Sec61beta family protein	N/A	-0.25	0.497	0.676	13.3895	13.5993	13.5841	12.8217	12.9829	13.2869
TGME49_211050	ATPase, AAA family protein	N/A	-0.3	0.538	0.709	8.10361	9.01678	8.31809	8.34461	5.34707	5.73232
TGME49_211060	hypothetical protein	N/A	-0.13	0.691	0.825	9.32622	9.39206	9.39371	9.051	10.0959	10.4314
TGME49_211080	hypothetical protein	N/A	-0.29	0.491	0.67	6.69729	6.53184	6.19001	6.4534	8.58987	8.73411
TGME49_211090	aminotransferase, class V superfamily protein	N/A	-0.69	0.0323	0.109	15.5812	15.4632	15.1096	14.4899	14.2347	14.4742
TGME49_211150	hypothetical protein	N/A	-0.41	0.238	0.417	11.2529	11.0189	10.5357	10.9079	10.755	10.1983
TGME49_211220	origin recognition complex subunit 4, putative	ORC4	-1.27	0.0214	0.0821	7.96214	8.153	7.24379	6.16168	7.33851	6.92429
TGME49_211230	eukaryotic initiation factor-2B, alpha subunit, putative	N/A	-0.19	0.473	0.655	10.6058	10.3144	10.2771	10.2793	12.3669	12.5264
TGME49_211240	peptidyl-tRNA hydrolase, putative	N/A	0.15	0.56	0.725	10.6397	10.6781	10.8242	10.7887	9.94685	10.15
TGME49_211250	hypothetical protein	N/A	-0.06	0.806	0.899	15.5579	15.8782	15.5842	15.7401	14.0884	14.1864
TGME49_211260	rhoptry kinase family protein ROP26 (incomplete catalytic triad)	ROP26	3.05	9.93e-08	1.02e-05	6.73644	5.36572	8.68688	9.62922	10.38	10.452
TGME49_211270	sushi domain (scr repeat) domain-containing protein	N/A	0.3	0.393	0.58	17.246	16.984	17.1321	17.6543	11.762	11.2487
TGME49_211280	hypothetical protein	N/A	-0.81	0.0201	0.0792	10.4047	10.6603	9.97139	9.42215	9.32036	9.02664
TGME49_211290	rhoptry protein ROP15	ROP15	3.56	2.99e-06	0.000104	8.74077	6.29367	10.7093	12.0655	10.2648	10.3343
TGME49_211300	DUF74 family protein, putative	N/A	-0.12	0.835	0.913	8.24608	7.70877	8.37609	7.21526	6.11287	6.45249
TGME49_211310	regulator of chromosome condensation, putative	N/A	-0.88	0.0349	0.115	9.30032	8.891	8.30621	8.14649	10.9069	10.0964
TGME49_211320	hypothetical protein	N/A	1.18	0.000109	0.0015	18.9411	19.0634	19.922	20.4033	12.6754	12.3488
TGME49_211330	methionine aminopeptidase 1c	MAP1c	0.5	0.401	0.589	6.88322	6.53184	7.54624	6.7614	6.99712	6.32282
TGME49_211340	hypothetical protein	N/A	0.5	0.136	0.287	13.7306	13.5549	13.8399	14.3959	12.6922	12.274
TGME49_211350	CBS domain-containing protein	N/A	-1.3	0.0273	0.0971	5.82448	6.68071	4.27274	5.57062	11.2419	10.6319
TGME49_211360	hypothetical protein	N/A	-0.7	0.0431	0.132	11.6528	11.5706	11.2191	10.5142	10.0925	10.2755
TGME49_211385	hypothetical protein	N/A	-1.71	0.0159	0.0664	4.95306	4.17783	3.52031	2.07335	11.0317	11.8037
TGME49_211390	ubiquitin-activating enzyme, putative	N/A	0.22	0.574	0.737	9.13801	8.91825	9.30989	9.20011	5.13357	4.45761
TGME49_211400	DEAD/DEAH box helicase domain-containing protein	N/A	-1.2	0.0465	0.139	5.49983	5.00811	4.45603	3.61237	8.72095	8.78951
TGME49_211410	translation initiation factor sui1 protein	N/A	-0.67	0.478	0.658	4.57522	4.59299	2.64086	4.64758	6.70501	6.75505
TGME49_211420	serine/arginine-rich splicing factor SR3	SR3	-0.38	0.218	0.394	9.43732	9.31442	9.22089	8.7133	11.6741	11.6949
TGME49_211430	centrosomal protein CEP110, putative	CEP110	0.48	0.385	0.574	6.69729	6.31205	7.23128	6.69594	6.58776	7.08149
TGME49_211440	hypothetical protein	N/A	-0.85	0.012	0.0544	9.78882	10.1644	9.0136	9.25417	11.2555	10.8058
TGME49_211450	pseudouridine synthase, putative	N/A	-0.2	0.623	0.773	9.01205	8.61198	8.324	8.88468	10.6768	10.2102
TGME49_211460	Myc-regulation protein MYR4	MYR4	0.39	0.253	0.435	6.8479	6.27505	6.99998	6.94167	13.1823	13.171
TGME49_211470	Fcf2 pre-rRNA processing protein	N/A	0.82	0.0825	0.205	6.77456	6.76318	7.85443	7.24608	7.2924	7.23357
TGME49_211480	GTP-binding protein engA, putative	N/A	0.99	0.000211	0.00253	13.2235	13.3043	14.1383	14.3658	10.6215	10.2879
TGME49_211600	hypothetical protein	N/A	0.34	0.468	0.651	9.97835	8.97702	9.51226	10.2126	10.9587	10.71
TGME49_211610	hypothetical protein	N/A	0.21	0.546	0.715	9.47253	8.86944	9.44881	9.37064	10.5712	10.7132
TGME49_211630	hypothetical protein	N/A	-0.52	0.243	0.423	8.80203	9.78644	8.52709	9.13573	13.1684	13.402
TGME49_211640	NGX6 domain-containing protein	N/A	-0.04	0.935	0.97	14.0681	13.7861	13.675	14.0922	9.86181	8.76476
TGME49_211650	hypothetical protein	N/A	1.15	0.0292	0.102	5.30524	5.68063	5.90489	7.1352	10.7357	10.5644
TGME49_211670	S1 RNA binding domain-containing protein	N/A	0.09	0.744	0.86	12.1875	12.5827	12.4702	12.5159	12.1117	12.3516
TGME49_211675	hypothetical protein	N/A	0.84	0.0096	0.0465	15.984	15.6871	16.5564	16.809	9.94238	9.36929
TGME49_211680	protein disulfide isomerase	PDI	-0.25	0.677	0.815	6.41307	7.99702	6.72439	7.49732	10.2855	10.433
TGME49_211690	AAA family protein	N/A	-0.8	0.00806	0.041	12.6169	12.4591	11.7517	11.7404	10.6238	10.1105
TGME49_211695	hypothetical protein	N/A	-1.06	0.65	0.794	3.25768	0	2.30094	0	9.13818	8.78248
TGME49_211700	SAC3 domain-containing protein	N/A	-0.69	0.0578	0.161	9.44915	9.02795	8.55749	8.5684	10.4536	9.93937
TGME49_211710	TB2/DP1, HVA22 family protein	N/A	-0.26	0.384	0.572	13.3271	13.631	13.4073	13.0306	14.4065	14.6423
TGME49_211720	AP2 domain transcription factor AP2IV-5	AP2IV5	0.88	0.00209	0.0148	12.9351	12.6534	13.4787	13.8607	12.8443	12.7164
TGME49_211730	histone lysine methyltransferase SET8	SET8	-0.15	0.59	0.749	13.0263	12.8562	12.6599	12.9194	10.2778	9.97063
TGME49_211850	hypothetical protein	N/A	2.08	0.00575	0.032	4.81356	2.32863	5.23493	6.53053	12.3608	12.6531
TGME49_211860	hypothetical protein	N/A	-0.59	0.0835	0.207	10.0364	10.1247	9.77411	9.13984	12.1034	12.3708
TGME49_211870	LSU ribosomal protein L18P, putative	N/A	3.12	0.0441	0.134	0	1.00419	1.20743	3.40951	10.9	10.9442
TGME49_211890	RAP domain-containing protein	N/A	0.68	0.0856	0.211	8.30586	8.51614	9.43523	8.63396	11.9646	11.6051
TGME49_211910	kinesin-related protein 3A, putative	N/A	1.27	6.39e-05	0.00102	9.70248	9.25866	10.7082	10.8159	7.34304	7.2128
TGME49_211920	hypothetical protein	N/A	3.51	0.00608	0.0334	10.9848	8.45956	12.4197	14.4032	8.64777	6.75505
TGME49_212030	hypothetical protein	N/A	3.64	9.96e-06	0.000258	12.641	10.1695	14.2057	16.1966	10.8351	10.2585
TGME49_212075	meiosis-specific nuclear structural protein 1, putative	N/A	0.99	0.000875	0.00754	13.9049	14.1156	14.7797	15.2016	7.58789	7.88591
TGME49_212090	hypothetical protein	N/A	1.68	0.0167	0.0686	3.63451	2.00628	5.01891	3.61237	12.2093	12.3103
TGME49_212100	ubiquitin activating enzyme UBA1	UBA1	0.38	0.424	0.609	8.80203	9.23236	8.93087	9.77372	7.67311	8.2442
TGME49_212110	histone lysine demethylase JMJD5	JMJD5	-0.51	0.72	0.844	3.79146	1.00419	3.34551	0	7.48507	7.75556
TGME49_212130	phospholipase, patatin family protein	N/A	-0.08	0.808	0.9	14.8531	14.6983	14.6527	14.7457	12.5359	11.8937
TGME49_212140	hypothetical protein	N/A	-0.06	0.883	0.943	11.1195	10.8109	10.6623	11.1348	10.7981	10.1452
TGME49_212150	conserved oligomeric Golgi complex subunit 4	COG4	0.03	0.942	0.975	8.24608	8.88487	8.51682	8.74601	9.42769	8.71762
TGME49_212160	hypothetical protein	N/A	0.42	0.267	0.451	8.51171	9.01398	9.32764	9.06403	8.84271	9.19096
TGME49_212170	GIY-YIG catalytic domain-containing protein	N/A	0.11	0.745	0.86	12.2292	12.1489	12.3179	12.278	9.47283	8.79301
TGME49_212180	hypothetical protein	N/A	0.43	0.176	0.342	11.9327	11.6777	12.3802	12.08	8.61817	9.06336
TGME49_212190	RNA recognition motif-containing protein	N/A	0.23	0.488	0.667	10.8134	11.0925	10.9996	11.3585	7.18548	7.61621
TGME49_212200	hypothetical protein	N/A	-0.24	0.513	0.689	8.87841	9.58579	9.1824	8.87485	13.3599	13.7047
TGME49_212210	hypothetical protein	N/A	1.32	0.00101	0.00848	7.6601	6.69479	8.62124	8.52508	12.7406	12.9641
TGME49_212220	zinc finger (CCCH type) motif-containing protein	N/A	0.87	0.00201	0.0143	14.4337	14.157	14.966	15.345	13.1527	13.2117
TGME49_212240	beta-1 tubulin, putative	N/A	0.01	0.988	1	9.04751	10.4992	9.53536	10.2849	8.38326	7.92154
TGME49_212250	XPG N-terminal domain-containing protein	N/A	0.32	0.197	0.369	13.6071	13.4324	13.7604	13.9115	13.1207	13.2974
TGME49_212260	zinc finger protein ZFP2	ZFP2	-0.36	0.259	0.441	14.2423	14.1832	14.1415	13.4826	13.0198	13.1098
TGME49_212270	CLAMP-linked invasion protein CLIP	CLIP	2.27	1.33e-05	0.000318	5.40581	4.86606	6.5739	7.90715	16.8145	17.0106
TGME49_212275	hypothetical protein	N/A	3.04	1.27e-09	3.22e-07	9.40731	8.38772	11.4193	12.4438	12.625	12.825
TGME49_212280	hypothetical protein	N/A	-3.1	0.111	0.249	4.57522	1.00419	1.8554	0	10.2498	10.4865
TGME49_212290	ribosomal protein RPS19	RPS19	0.28	0.648	0.793	4.18022	5.17806	4.17156	5.61851	12.8273	13.3763
TGME49_212300	dense granule protein GRA32	GRA32	-0.31	0.599	0.754	3.79146	3.70817	3.67619	3.17338	14.3123	14.4109
TGME49_212310	vacuolar ATP synthetase	N/A	-0.28	0.38	0.569	14.2559	14.7086	14.3758	14.0497	11.948	12.2686
TGME49_212410	dense granule protein GRA11A	GRA11A	0.73	0.69	0.825	3.79146	0	2.91577	3.94849	4.60968	4.71558
TGME49_212420	hypothetical protein	N/A	4.18	0.237	NA	0	0	0	3.17338	4.06863	2.25225
TGME49_212710	phenylalanine-4-hydroxylase	N/A	0.84	0.00123	0.00979	11.5927	11.477	12.3634	12.4037	8.62749	8.41757
TGME49_212725	hypothetical protein	N/A	0.59	0.0154	0.065	13.8592	13.7243	14.4757	14.2824	11.2654	11.4232
TGME49_212735	transporter, major facilitator family protein	N/A	-0.08	0.849	0.922	11.5418	10.8133	11.397	10.8376	6.35638	5.96124
TGME49_212740	aromatic amino acid hydrolase AAH2	AAH2	2.21	3.39e-06	0.000113	9.22661	9.8044	11.0306	12.217	11.9926	12.0449
TGME49_212760	hypothetical protein	N/A	-0.13	0.884	0.943	4.88499	4.9623	5.66539	2.07335	9.40729	9.99365
TGME49_212770	inner membrane complex protein IMC34	IMC34	2.48	9.83e-06	0.000256	5.25219	3.81513	6.82777	7.33477	10.2972	10.1493
TGME49_212775	hypothetical protein	N/A	4.18	0.386	NA	0	0	0	3.17338	0	0
TGME49_212780	hypothetical protein	N/A	1.75	0.00109	0.00895	9.46672	8.73627	10.2953	11.3164	8.9944	8.12976
TGME49_212800	kinetochore protein SPC24, putative	SPC24	-0.74	0.0422	0.13	10.4759	10.1479	9.87411	9.20404	9.82746	9.85476
TGME49_212810	hypothetical protein	N/A	0.23	0.735	0.853	8.94259	10.391	8.95771	10.6982	6.60295	6.54679
TGME49_212820	ubiquitin family protein	N/A	-1.41	0.000362	0.00382	10.8859	10.8857	9.86806	8.92333	12.0191	11.8348
TGME49_212830	expressed protein JLP1	N/A	-0.68	0.622	0.772	3.25768	3.70817	2.91577	2.89088	3.60862	3.41677
TGME49_212840	HIT zinc finger protein	N/A	-0.58	0.101	0.235	11.2162	11.1739	10.9257	10.2165	10.7227	10.9575
TGME49_212850	PI31 domain-containing protein	N/A	0.17	0.542	0.712	13.2304	13.5736	13.4649	13.6833	13.4546	13.5954
TGME49_212860	hypothetical protein	N/A	-1.08	0.00896	0.0442	11.292	10.7498	10.3309	9.46863	10.7541	10.7325
TGME49_212880	centrosomal protein CEP250	CEP250	0.28	0.478	0.658	13.3159	13.1317	13.1561	13.7932	10.8658	10.1182
TGME49_212900	hypothetical protein	N/A	0.07	0.831	0.91	9.50407	9.86011	9.45958	10.0187	12.8874	12.8464
TGME49_212910	rhomboid protease ROM3	ROM3	1.21	8.84e-05	0.00129	15.0642	15.2495	16.0543	16.629	8.70168	8.73046
TGME49_212920	hypothetical protein	N/A	2.71	3.2e-06	0.00011	6.8117	6.36582	8.32988	9.87332	10.0797	10.4838
TGME49_212930	NifU family domain-containing protein	N/A	0.54	0.0483	0.143	11.6881	11.8266	12.2148	12.3744	11.8086	12.1518
TGME49_212937	hypothetical protein	N/A	1.5	0.00358	0.0223	7.57626	6.6082	8.58727	8.72975	7.08087	7.58826
TGME49_212940	condensin-2 complex subunit H2, putative	N/A	-1.23	0.0104	0.0491	8.73595	8.64497	7.77041	6.97884	8.55319	9.33366
TGME49_212950	ADP-ribosylation factor family protein 2, putative	N/A	0.11	0.716	0.84	10.8968	11.372	11.2207	11.3101	7.50137	7.66289
TGME49_212960	pre-mRNA-splicing regulator WTAP	N/A	-0.66	0.212	0.387	7.26428	6.98558	7.01466	5.57062	10.6902	10.5639
TGME49_212970	protein kinase (incomplete catalytic triad)	N/A	0.96	0.0243	0.09	17.5355	16.899	18.2109	18.2116	12.1261	11.1694
TGME49_212980	KH domain-containing protein	N/A	1.5	0.000988	0.00834	9.38284	10.1415	10.7149	11.7302	14.8109	14.808
TGME49_212990	IMC sutures component ISC3 paralog	N/A	0.52	0.178	0.344	14.6802	14.2004	14.7905	15.1417	11.6178	10.8859
TGME49_213000	replication factor C, subunit 5, putative	N/A	-1.18	0.581	0.743	1.27942	0	0	0	7.83302	7.90546
TGME49_213010	hypothetical protein	N/A	-0.94	0.0761	0.195	8.10361	7.81569	7.3048	6.67344	7.03681	7.80843
TGME49_213020	RING zinc finger protein	N/A	-1.32	0.00013	0.00169	15.1306	14.8068	13.8416	13.4388	8.53549	7.94692
TGME49_213030	clathrin light chain, putative	N/A	0.34	0.13	0.278	12.3802	12.3289	12.6706	12.7197	10.9472	10.8405
TGME49_213040	centromere protein CENP-C	CENPC	0.4	0.5	0.677	8.95924	8.37029	8.06657	9.69213	10.1774	9.81311
TGME49_213050	hypothetical protein	N/A	0	0.998	1	6.93463	8.01396	6.97016	8.00949	11.5937	11.7967
TGME49_213060	WD domain, G-beta repeat-containing protein	N/A	-0.22	0.615	0.768	10.1764	10.0514	9.48616	10.2223	9.21927	8.50559
TGME49_213065	hypothetical protein	N/A	0.01	0.987	1	7.09385	7.97988	7.0292	8.03619	9.06191	9.08066
TGME49_213067	dense granule protein GRA36	GRA36	0.45	0.477	0.657	11.5847	13.2231	12.231	13.6048	9.62845	9.77466
TGME49_213069	ATP synthase mitochondrial F1 complex assembly factor 1, putative	ATP11	0.89	0.61	0.763	0	1.59055	2.30094	0	6.7329	6.62747
TGME49_213072	protein SLY1	SLY1	0.04	0.952	0.98	7.35512	6.158	6.74214	7.06779	6.51735	5.83102
TGME49_213100	hypothetical protein	N/A	-4.72	0.0435	0.133	3.93301	0	0	0	6.66215	6.14787
TGME49_213115	hypothetical protein	N/A	-0.74	0.192	0.363	7.09385	7.85382	6.26561	7.1996	8.28309	7.94377
TGME49_213240	hypothetical protein	N/A	-0.68	0.156	0.315	7.93715	7.24672	7.2562	6.55536	9.67321	9.33606
TGME49_213255	hypothetical protein	N/A	-0.99	0.298	0.484	4.73841	7.74304	4.61863	6.62736	11.4852	10.5933
TGME49_213280	SAG-related sequence SRS25	SRS25	-1.11	0.186	0.355	4.57522	2.00628	3.14658	2.07335	19.7485	19.8916
TGME49_213290	hypothetical protein	N/A	-1.1	0.0122	0.0551	8.92576	9.55139	8.35317	7.96387	5.51707	5.9234
TGME49_213300	hypothetical protein	N/A	-1.18	0.176	0.342	4.18022	5.29356	3.67619	3.7902	6.85211	6.32282
TGME49_213310	hypothetical protein	N/A	-0.13	0.789	0.888	10.9868	11.3144	10.37	11.4898	9.10655	8.58854
TGME49_213325	TBC domain-containing protein TBC18	TBC18	-0.42	0.322	0.511	10.8968	11.2294	10.2495	10.9715	8.93412	8.26453
TGME49_213340	GMC oxidoreductase	N/A	3.86	0.00169	0.0126	11.4804	8.03624	13.7904	14.9331	11.1169	10.8093
TGME49_213350	ribosomal protein RPS15	RPS15	0.46	0.326	0.515	5.45359	5.62291	5.77293	6.19365	10.8202	11.5626
TGME49_213360	leucine rich repeat-containing protein	N/A	1.18	0.18	0.347	4.3912	4.9623	5.42278	6.19365	3.27102	2.99833
TGME49_213370	formin FRM3	FRM3	-0.77	0.00865	0.0431	13.2659	12.9908	12.3656	12.3577	8.1729	7.7192
TGME49_213380	hypothetical protein	N/A	-0.05	0.981	NA	3.63451	2.32863	2.64086	3.40951	1.6022	0
TGME49_213388	hypothetical protein	N/A	-0.86	0.000187	0.0023	12.466	12.4386	11.6198	11.5742	9.26056	9.37163
TGME49_213392	surface antigen repeat-containing protein	N/A	-1.34	1.67e-05	0.000369	9.51255	9.3615	8.22015	7.98229	11.3976	11.057
TGME49_213400	zinc finger (CCCH type) motif-containing protein	N/A	0.06	0.848	0.922	12.6938	12.5005	12.3915	12.8913	11.0671	10.7375
TGME49_213410	small nuclear ribonucleoprotein f (snrnp-f), putative	N/A	-0.64	0.35	0.539	8.38807	8.64859	8.58727	6.4534	10.003	10.7474
TGME49_213415	hypothetical protein	N/A	0.79	0.226	0.404	6.91769	7.39203	6.90861	8.56229	7.96232	7.92154
TGME49_213420	RAP domain-containing protein	N/A	0.51	0.0723	0.188	10.9011	10.53	11.1401	11.3327	10.3204	10.3015
TGME49_213460	hypothetical protein	N/A	0.44	0.224	0.4	11.5418	11.0596	11.8049	11.7096	8.23027	8.83269
TGME49_213480	hypothetical protein	N/A	0.96	0.0926	0.222	12.1759	13.3328	12.9765	14.3571	13.1244	13.437
TGME49_213490	hypothetical protein	N/A	-0.43	0.874	NA	1.27942	3.00733	0	2.89088	1.01295	1.65581
TGME49_213520	peptidase M20D, amidohydrolase	N/A	0.36	0.346	0.535	11.6243	12.2572	11.9932	12.6107	13.1543	13.358
TGME49_213530	hypothetical protein	N/A	-0.01	0.99	1	10.8019	10.1994	10.819	10.183	9.24006	8.85129
TGME49_213550	palmitoyltransferase DHHC4	DHHC4	0.41	0.21	0.384	14.2011	13.8379	14.2134	14.6408	12.3781	11.974
TGME49_213560	hypothetical protein	N/A	0.8	0.0483	0.143	8.1259	8.1011	8.96529	8.855	2.72229	3.41677
TGME49_213570	hypothetical protein	N/A	0.25	0.408	0.595	12.9043	13.2411	13.2994	13.3668	13.2171	13.6692
TGME49_213580	ribosomal protein L41	RPL41	0.39	0.598	0.753	4.0619	3.46704	4.06274	4.2209	7.54134	8.13529
TGME49_213590	hypothetical protein	N/A	-0.56	0.0617	0.168	10.0921	10.1441	9.75018	9.33524	12.7118	13.0077
TGME49_213600	hypothetical protein	N/A	-0.95	0.038	0.122	6.69729	7.36587	6.24085	6.02619	9.86653	9.47118
TGME49_213610	hypothetical protein	N/A	0.96	0.000769	0.00685	14.7307	14.2791	15.3788	15.5794	15.5354	15.4513
TGME49_213620	ABC1 family protein	N/A	0.49	0.175	0.342	15.7041	15.2075	15.8261	16.0969	10.6478	10.0118
TGME49_213635	hypothetical protein	N/A	0.26	0.771	0.876	6.28688	2.81453	5.58897	5.70979	12.482	11.5205
TGME49_213650	ATP-binding domain 1 family protein	N/A	0.1	0.763	0.87	11.9624	11.8012	12.1132	11.8346	12.1446	12.661
TGME49_213660	zinc finger (CCCH type) motif-containing protein	N/A	0.99	0.0621	0.169	9.80042	8.40495	10.5395	9.90263	12.2443	12.7108
TGME49_213670	MIC60 domain-containing protein	N/A	0.03	0.934	0.97	7.29082	7.37464	7.3402	7.40474	7.92049	7.92474
TGME49_213680	MmgE/PrpD family protein	N/A	0.08	0.754	0.865	14.5798	14.7127	14.749	14.7092	10.0481	9.6964
TGME49_213690	E3 ubiquitin-protein ligase RBX1, putative	N/A	0.36	0.256	0.438	13.386	13.2861	13.7873	13.611	9.86968	10.4897
TGME49_213700	coiled-coil domain-containing protein	N/A	-0.58	0.584	0.746	5.5881	4.70849	5.23493	3.61237	3.882	4.38521
TGME49_213710	WD domain, G-beta repeat-containing protein	N/A	1.47	1.77e-06	7.28e-05	7.38006	7.25624	8.66378	8.92809	10.4739	10.4325
TGME49_213720	dynein regulatory complex subunit 7, putative	N/A	0.35	0.156	0.316	11.6256	11.8353	12.0446	12.1319	9.22541	9.08638
TGME49_213730	lanthionine synthetase C family protein	N/A	-0.68	0.053	0.151	13.8138	14.1381	13.6036	12.9372	14.9197	15.2032
TGME49_213740	methyltransferase, putative	N/A	0.16	0.681	0.818	11.838	11.572	11.6228	12.0762	8.96531	8.262
TGME49_213746	hypothetical protein	N/A	-0.25	0.486	0.665	9.84364	9.76325	9.80822	9.24276	9.92511	10.3611
TGME49_213748	hypothetical protein	N/A	0.7	0.0368	0.119	10.3008	10.8994	11.2992	11.3602	5.34707	5.33113
TGME49_213752	herpesviridae ul52/ul70 dna primase	N/A	-1.55	0.00736	0.0386	11.0416	10.6648	9.92357	8.23365	5.89571	5.61058
TGME49_213760	hypothetical protein	N/A	3.57	8.29e-07	4.44e-05	8.95094	6.73621	11.0279	12.2868	7.33396	7.08149
TGME49_213770	Superkiller viralicidic activity 2 family 2, putative	N/A	-0.46	0.334	0.522	6.2055	5.62291	5.62768	5.30391	9.24249	9.44582
TGME49_213780	radical SAM domain-containing protein	N/A	0.76	0.364	0.552	5.40581	4.86606	4.69354	6.69594	6.93246	7.7192
TGME49_213790	CRAL/TRIO domain-containing protein	N/A	-1.15	0.00518	0.0295	9.74149	9.18078	8.54237	8.08814	7.72956	7.40357
TGME49_213800	protein phosphatase 2b regulatory subunit, putative	N/A	-0.62	0.0689	0.182	12.4863	12.5314	12.2096	11.4736	12.8117	12.8971
TGME49_213810	iron-sulfur cluster protein ISCA	ISCA	-0.62	0.0496	0.145	10.3879	10.2166	9.90399	9.42552	10.3031	10.4308
TGME49_213820	hypothetical protein	N/A	2.45	8.03e-06	0.000217	10.7053	9.31442	12.0934	13.006	9.90304	9.61167
TGME49_213830	Ufm1-conjugating enzyme 1	UFC1	-0.54	0.121	0.265	9.96193	10.1117	9.78485	9.14802	12.0002	12.293
TGME49_213840	choline transporter-like protein, putative	N/A	-0.46	0.448	0.632	7.73933	9.34151	8.32988	8.26408	7.17535	6.92429
TGME49_213850	MORN repeat-containing protein	N/A	-1.3	0.00552	0.0312	16.7186	16.9181	16.0131	14.77	12.5889	12.079
TGME49_213860	hypothetical protein	N/A	-0.52	0.197	0.369	12.8689	13.736	12.8458	12.8433	10.535	11.0926
TGME49_213870	UBA/TS-N domain-containing protein	N/A	0.45	0.114	0.255	13.9734	13.6058	14.1909	14.31	10.9259	10.6221
TGME49_213880	hypothetical protein	N/A	1.77	0.00507	0.029	5.25219	5.78958	6.70641	7.72223	6.71204	6.87887
TGME49_213890	Myb family DNA-binding domain-containing protein	N/A	0.31	0.366	0.554	9.07067	8.6304	9.27982	9.04224	9.96313	9.77022
TGME49_213900	regulator of chromosome condensation RCC1	N/A	-1.06	0.0028	0.0186	11.4564	11.0273	10.4812	9.83835	12.5073	12.3866
TGME49_213910	hypothetical protein	N/A	-0.45	0.221	0.397	9.41637	9.51813	9.30093	8.65708	11.6018	11.1633
TGME49_213920	hypothetical protein	N/A	-0.24	0.445	0.629	12.0954	12.0439	11.7423	11.9099	9.5246	8.92815
TGME49_213930	exosome complex component RRP45, putative	N/A	0.34	0.274	0.457	9.2872	9.03072	9.35385	9.63214	9.55713	9.56635
TGME49_213940	CHCH domain-containing protein	N/A	0.19	0.469	0.652	15.6228	15.845	15.8471	15.9997	13.5458	13.8019
TGME49_213950	hypothetical protein	N/A	1.38	0.000883	0.0076	7.1957	6.76318	7.95681	8.67983	10.4213	10.5015
TGME49_213970	ribosomal RNA small subunit methyltransferase B, putative	N/A	0.16	0.69	0.824	8.40031	8.7226	9.03176	8.33747	9.96681	10.054
TGME49_214070	hypothetical protein	N/A	-0.38	0.282	0.466	9.68257	9.60827	9.48879	9.00218	7.21048	7.50529
TGME49_214080	toxofilin	N/A	3.76	9.88e-07	5.02e-05	11.5153	9.45337	13.2467	15.2643	12.1509	12.3494
TGME49_214090	signal peptidase	N/A	-0.9	0.025	0.0916	8.996	8.74982	7.88671	8.07103	12.013	11.1838
TGME49_214100	hypothetical protein	N/A	-0.61	0.0549	0.155	8.39421	8.16316	7.6249	7.72223	12.0822	11.7144
TGME49_214110	protein yipf5, putative	N/A	-1.15	0.000121	0.00161	8.41848	8.37029	7.35181	7.1352	11.0148	11.1342
TGME49_214120	hypothetical protein	N/A	-1.59	0.000272	0.00301	8.13325	7.94497	6.59359	6.3149	7.14454	6.93067
TGME49_214130	hypothetical protein	N/A	-1.04	0.00132	0.0103	11.5678	11.0885	10.3996	10.2067	7.73991	7.47509
TGME49_214140	hypothetical protein	N/A	-0.59	0.0924	0.222	10.6754	10.5132	9.67361	10.2849	9.38988	9.11324
TGME49_214150	mitochondrial import inner membrane translocase subunit TIM23	TIM23	-0.18	0.542	0.712	9.57868	9.77157	9.58046	9.41877	8.70872	8.58451
TGME49_214160	hypothetical protein	N/A	-3.06	0.445	NA	2.74623	2.81453	1.20743	0	0	0
TGME49_214170	hypothetical protein	N/A	-0.85	0.0182	0.0736	9.81421	9.77655	8.84722	9.02901	5.48463	6.06917
TGME49_214180	epsin-like protein EPSL	EPSL	-0.85	0.00615	0.0337	13.3173	13.3553	12.7596	12.159	13.3676	13.3514
TGME49_214190	SAG-related sequence SRS46	SRS46	0.02	0.971	0.991	7.26428	7.3212	7.35181	7.27625	5.48463	6.5301
TGME49_214200	WD domain, G-beta repeat-containing protein	N/A	-1.09	0.0185	0.0745	7.81444	7.74304	6.98515	6.3149	7.5175	7.58017
TGME49_214210	rRNA pseudouridine synthase	N/A	0.32	0.487	0.666	4.73841	5.00811	5.42278	4.90099	11.8847	12.2843
TGME49_214220	hypothetical protein	N/A	1.3	0.00011	0.00151	11.0464	11.0575	11.9811	12.6411	18.0668	18.3639
TGME49_214230	Dopey, N-terminal domain-containing protein	N/A	-1.49	6.25e-05	0.001	9.92639	9.65941	8.51165	8.08814	8.39857	7.9994
TGME49_214240	bromodomain-containing protein	N/A	-0.37	0.231	0.409	8.29934	8.31668	7.91046	7.96387	10.9959	10.6523
TGME49_214250	cytochrome b-c1 complex subunit 11	QCR11	-0.11	0.719	0.843	12.6034	13.0696	12.668	12.823	12.5102	12.7939
TGME49_214260	alpha-glucan water dikinase 1, putative	N/A	-0.9	0.00756	0.0392	14.1553	13.8211	13.3502	12.7936	11.875	11.5414
TGME49_214270	translation initiation factor IF-2, putative	N/A	0.89	0.00899	0.0443	12.537	11.864	13.005	13.2422	11.7999	11.9653
TGME49_214280	phosphoadenosine phosphosulfate reductase family protein	N/A	0.46	0.163	0.325	14.0554	13.3765	14.1745	14.247	11.6315	11.5885
TGME49_214290	DJ-1 family protein	N/A	0.23	0.616	0.768	5.96298	5.65206	6.40587	5.30391	13.439	13.6548
TGME49_214295	hypothetical protein	N/A	0	1	NA	0	0	0	0	0.593608	1.88313
TGME49_214300	hypothetical protein	N/A	0.71	0.201	0.373	8.28621	6.85379	8.74966	8.05372	11.8601	11.4119
TGME49_214310	hypothetical protein	N/A	0.57	0.0337	0.112	14.34	14.5579	14.9388	15.0957	10.6835	10.3688
TGME49_214320	facilitative glucose transporter GT1	GT1	2.35	3.28e-06	0.000111	7.8771	6.46771	9.39371	9.91227	12.9927	13.0325
TGME49_214330	DnaJ domain-containing protein	N/A	-0.62	0.142	0.296	12.0353	12.2096	11.8603	11.0468	12.2675	12.9681
TGME49_214340	hypothetical protein	N/A	-0.84	0.0989	0.232	11.742	11.0738	11.1258	9.80251	11.823	11.9913
TGME49_214350	GTP-binding protein, putative	N/A	-0.82	0.128	0.275	7.55451	7.0744	6.86065	6.06127	7.42224	7.3235
TGME49_214370	hypothetical protein	N/A	-0.74	0.0949	0.226	11.8073	11.8539	11.5654	10.38	11.3463	11.4545
TGME49_214385	hypothetical protein	N/A	-0.33	0.419	0.605	10.5045	10.857	10.7059	9.91227	10.7973	11.2932
TGME49_214400	hypothetical protein	N/A	6.19	3.75e-10	1.34e-07	0	2.32863	6.63219	7.87792	8.52157	8.54766
TGME49_214410	hypothetical protein	N/A	0.12	0.712	0.838	7.61879	8.14277	8.05241	8.00048	13.4505	13.2655
TGME49_214420	hypothetical protein	N/A	3.67	0.0357	0.117	0	0	2.64086	0	8.64043	8.745
TGME49_214430	hypothetical protein	N/A	5.47	0.00389	0.0237	0	0	2.64086	3.94849	6.80034	5.62637
TGME49_214440	4'-phosphopantetheinyl transferase superfamily protein	N/A	1.43	0.000187	0.0023	9.04751	9.49016	10.2802	11.0522	12.5793	12.6759
TGME49_214470	ubiquitin-like protease ULP1	ULP1	-0.08	0.813	0.902	8.9757	9.33029	9.24911	8.8993	11.1589	11.2132
TGME49_214480	replication factor a protein 3 protein	N/A	0.21	0.512	0.688	8.69679	9.01678	8.92311	9.20796	10.6345	10.8002
TGME49_214490	peptidase M16 inactive domain-containing protein	N/A	-0.68	0.0467	0.139	9.24709	9.07175	8.44275	8.52508	7.82008	7.47944
TGME49_214500	ankyrin repeat-containing protein	N/A	-0.42	0.159	0.32	9.54875	9.72432	9.12266	9.30994	10.9905	11.3226
TGME49_214510	hypothetical protein	N/A	0.11	0.664	0.806	10.9939	11.0328	11.1443	11.1089	7.29708	7.57611
TGME49_214520	general transcription factor IIH polypeptide 4 GTF2H4	GTF2H4	-0.25	0.635	0.783	7.23723	6.78965	6.79413	6.7614	5.69771	5.33113
TGME49_214530	DnaJ domain-containing protein	N/A	-0.09	0.791	0.889	6.93463	6.51607	6.61302	6.67344	11.8094	11.5971
TGME49_214540	hypothetical protein	N/A	-0.45	0.306	0.492	8.33166	8.66299	8.30023	7.74398	9.70523	10.3949
TGME49_214560	hypothetical protein	N/A	0.17	0.56	0.725	10.5519	10.2587	10.6137	10.5487	9.41591	9.14785
TGME49_214570	hypothetical protein	N/A	2.3	1.01e-05	0.000259	14.4253	13.1833	15.6516	16.6403	13.133	13.0245
TGME49_214575	hypothetical protein	N/A	-0.25	0.826	0.908	3.25768	5.09559	4.45603	3.94849	4.80621	4.65528
TGME49_214580	tetratricopeptide repeat-containing protein	N/A	-0.41	0.424	0.61	8.14785	9.18578	8.16198	8.51878	5.5951	5.29206
TGME49_214590	micro-fibrillar-associated protein 1	N/A	0.43	0.0503	0.146	14.6874	14.6669	15.0576	15.1478	12.2846	12.3693
TGME49_214600	hypothetical protein	N/A	-0.66	0.219	0.395	7.18158	7.2657	5.93607	7.01508	9.92511	9.20417
TGME49_214610	trafficking protein particle complex subunit TRS85	TRS85	-1.8	4.44e-06	0.000139	9.45796	9.10902	7.38609	7.59632	5.23455	4.93434
TGME49_214620	prolyl hydroxylase PHYb	PHYb	-1.15	0.0139	0.0605	11.4811	11.1808	10.6762	9.44889	12.5553	12.2047
TGME49_214630	hypothetical protein	N/A	-0.27	0.498	0.676	13.9008	13.548	13.1866	13.7072	9.67051	8.93292
TGME49_214740	hypothetical protein	N/A	-0.99	0.0844	0.209	7.1957	7.03067	5.66539	6.50528	6.4178	6.45249
TGME49_214750	hypothetical protein	N/A	2.06	0.0123	0.0554	1.94666	4.53157	4.76475	6.3719	10.6565	10.6349
TGME49_214760	erythronate-4-phosphate dehydrogenase domain-containing protein	N/A	-0.08	0.816	0.903	9.57598	9.34375	9.64794	9.06403	11.6847	11.5241
TGME49_214770	ras-related protein RAB1B	RAB1B	-0.17	0.549	0.717	12.8532	12.7751	12.8527	12.411	12.4972	12.4528
TGME49_214780	hydrolase, NUDIX family protein	N/A	4.27	1.77e-05	0.000386	3.45836	2.00628	5.99649	7.51007	5.11249	5.12426
TGME49_214790	glycoprotein	N/A	-0.68	0.315	0.502	3.79146	5.33009	4.06274	4.2209	9.42769	9.33486
TGME49_214800	hypothetical protein	N/A	0.05	0.895	0.949	10.9837	11.5553	11.1131	11.5474	10.0349	10.403
TGME49_214810	PRA1 family protein, putative	N/A	0.69	0.00344	0.0216	13.8277	13.7702	14.5091	14.4639	10.0059	9.77554
TGME49_214820	DNA repair protein DRE	N/A	-0.78	0.086	0.211	7.20968	6.63764	6.53369	5.66487	11.8002	12.2477
TGME49_214830	exportin-T, putative	N/A	-0.4	0.321	0.51	13.6543	13.4217	13.4752	12.7052	9.37999	8.71578
TGME49_214835	hypothetical protein	N/A	0.64	0.418	0.604	5.13987	4.00785	5.58897	4.90099	6.5801	6.68138
TGME49_214840	AP2 domain transcription factor AP2X-7	AP2X7	-0.1	0.791	0.889	15.2288	15.1177	14.5465	15.4587	13.4862	13.688
TGME49_214850	1-deoxy-D-xylulose 5-phosphate reductoisomerase, putative	N/A	-3.75	0.186	0.356	0	3.00733	0	0	11.0353	10.5903
TGME49_214870	ribosomal protein L9, N-terminal domain-containing protein	N/A	-0.5	0.33	0.518	9.51537	8.57059	9.03176	8.03619	10.4452	10.7343
TGME49_214880	apical cap protein AC4	AC4	4.02	0.0207	0.0803	4.3912	0	6.87681	7.6777	10.0307	9.77377
TGME49_214900	hypothetical protein	N/A	2.7	0.314	NA	2.40114	0	3.14658	4.33997	1.33745	0
TGME49_214910	hypothetical protein	N/A	0	1	1	0	0	0	0	6.03661	6.45249
TGME49_214920	GPI-anchored wall transfer protein GWT1, putative	N/A	-1.53	0.000973	0.00825	9.44029	10.2372	8.69145	7.95457	8.39421	8.53308
TGME49_214930	ATP synthase-associated protein	N/A	-0.14	0.572	0.736	9.69505	9.8365	9.58539	9.66387	12.9044	13.0898
TGME49_214940	MIC2-associated protein M2AP	M2AP	2.38	0.000963	0.0082	3.63451	0	4.53962	4.97645	17.1299	17.3066
TGME49_214950	hypothetical protein	N/A	-0.1	0.802	0.896	6.11926	5.70865	5.99649	5.57062	13.6076	13.9563
TGME49_214960	AP2 domain transcription factor AP2X-8	AP2X8	-0.02	0.975	0.993	8.38191	7.96253	7.3402	8.69666	11.2054	10.7438
TGME49_214970	DNA replication licensing factor MCM2	MCM2	1.97	0.0103	0.0489	3.93301	3.00733	5.42278	5.36134	7.41365	6.84553
TGME49_214980	hypothetical protein	N/A	0.68	0.0467	0.139	16.1244	15.9885	16.37	17.0324	13.5661	13.2146
TGME49_214990	hypothetical protein	N/A	-0.56	0.0829	0.206	14.2237	13.979	13.2149	13.8197	9.48005	9.39602
TGME49_215010	hypothetical protein	N/A	0.46	0.377	0.566	7.34249	7.85382	7.56631	8.46084	7.00286	7.2128
TGME49_215020	hypothetical protein	N/A	-0.87	0.0615	0.168	8.16947	8.01396	7.6249	6.67344	9.34089	9.1034
TGME49_215030	helicase, putative	N/A	-1.15	0.00594	0.0328	10.6123	10.0445	9.18889	9.22353	9.60412	8.83439
TGME49_215040	HEAT repeat-containing protein	N/A	-1.37	0.000836	0.00728	11.0513	10.624	9.70563	9.21576	8.23027	7.55564
TGME49_215055	hypothetical protein	N/A	-1.62	0.47	0.653	3.25768	0	1.8554	0	5.27304	5.2519
TGME49_215060	small GTP-binding protein sar1, putative	N/A	-0.45	0.0879	0.214	10.4153	10.4698	10.0836	9.90021	8.91143	8.88942
TGME49_215070	ferredoxin FD	FD	0.11	0.734	0.853	8.08856	8.38338	8.10137	8.58055	11.3726	11.4507
TGME49_215080	hypothetical protein	N/A	-1.31	0.00136	0.0105	9.81192	9.45337	8.18812	8.4674	10.6955	9.92827
TGME49_215090	ATP binding protein, putative	N/A	-0.71	0.117	0.259	10.7562	10.3438	10.3147	9.1803	12.3554	12.5624
TGME49_215100	PP-loop family protein	N/A	-3.73	0.392	NA	0	3.00733	0	0	2.01938	1.65581
TGME49_215130	adaptor-related protein complex 3, sigma 2 subunit	N/A	-0.81	0.0257	0.0931	12.0176	12.5065	11.7637	11.1151	11.1363	11.2839
TGME49_215140	hypothetical protein	N/A	4	1.55e-06	6.75e-05	10.9	7.86632	13.2354	14.5837	9.83954	9.71867
TGME49_215150	AP2 domain transcription factor AP2X-9	AP2X9	0.14	0.694	0.827	14.5602	14.4449	14.2467	14.9519	11.9878	11.6468
TGME49_215160	hypothetical protein	N/A	0.61	0.0569	0.159	6.65705	6.77648	7.20591	7.45836	11.8353	12.0603
TGME49_215165	hypothetical protein	N/A	1.05	0.00252	0.0171	14.6079	14.4498	15.1903	15.886	9.07558	8.75939
TGME49_215170	serine/threonine-protein phosphatase 2A catalytic subunit beta isoform, putative	N/A	0.13	0.589	0.748	15.9085	15.8921	16.073	15.9901	12.0086	11.7208
TGME49_215210	F-box domain-containing protein	N/A	0.57	0.102	0.237	7.79603	8.30296	8.51682	8.76742	13.5046	13.9576
TGME49_215220	dense granule protein GRA22	GRA22	-0.44	0.252	0.434	8.46001	9.29838	8.37609	8.63396	14.7335	14.9481
TGME49_215230	RNA recognition motif-containing protein	N/A	-0.31	0.392	0.58	12.5045	12.2065	12.3883	11.6249	13.3126	13.4096
TGME49_215250	thiamin pyrophosphokinase, catalytic domain-containing protein	N/A	0.2	0.546	0.715	10.3089	9.9727	10.0304	10.618	11.8697	11.8498
TGME49_215260	carbamoylphosphate synthetase	N/A	0.24	0.689	0.824	6.3887	5.98552	6.38342	6.57976	6.09149	5.64199
TGME49_215280	succinate dehydrogenase [ubiquinone] iron-sulfur subunit SDHB	SDHB	0.17	0.635	0.783	8.37573	8.03624	7.9644	8.71881	14.2628	14.3395
TGME49_215290	saccharopine dehydrogenase domain-containing protein	N/A	0.48	0.0226	0.085	17.0909	17.0347	17.5428	17.5497	15.0794	15.1385
TGME49_215300	hypothetical protein	N/A	-0.69	0.0333	0.111	9.95156	10.2396	9.62659	9.1723	12.9589	13.2699
TGME49_215320	ODAD3 domain-containing protein	N/A	0.9	0.0409	0.128	8.13325	7.84754	8.60192	9.1521	8.37443	9.00264
TGME49_215328	transporter, putative	N/A	1.56	0.0261	0.0938	7.0787	8.153	8.08755	9.92423	6.96809	6.98066
TGME49_215347	hypothetical protein	N/A	0.58	0.212	0.386	8.33166	8.79951	9.11927	9.20404	9.07694	10.0555
TGME49_215350	hypothetical protein	N/A	0.17	0.459	0.642	14.2605	14.3547	14.5603	14.4024	13.3665	13.5333
TGME49_215360	dense granule protein GRA62	GRA62	0.59	0.118	0.262	8.35701	7.58576	8.60678	8.61637	14.8352	15.2896
TGME49_215370	hypothetical protein	N/A	-0.72	0.129	0.277	10.6967	10.4523	10.1795	9.4555	8.76043	7.79102
TGME49_215380	hypothetical protein	N/A	0.61	0.0209	0.0807	11.9675	11.848	12.4395	12.5962	11.7712	12.0796
TGME49_215385	transporter, major facilitator family protein	N/A	1.27	0.000377	0.00392	15.0048	15.0761	15.8567	16.6636	8.56875	8.75581
TGME49_215390	TIM10 family protein, putative	N/A	-0.28	0.54	0.711	8.84297	9.84914	9.14952	9.16021	9.57553	10.0547
TGME49_215400	RNA recognition motif-containing protein	N/A	-0.26	0.616	0.768	8.35071	9.07444	8.86758	8.01845	9.58895	10.3253
TGME49_215410	DPCD family protein	N/A	0.11	0.723	0.846	9.50123	9.74983	9.6242	9.85094	5.84551	5.64199
TGME49_215420	synaptobrevin homolog YKT6, putative	N/A	-0.16	0.668	0.808	13.4212	13.6538	13.7457	12.8974	9.99298	10.1084
TGME49_215430	mitochondrial marker protein MYS	MYS	0.86	0.00185	0.0135	14.2693	14.3728	15.0492	15.3109	13.0047	13.365
TGME49_215440	WWE domain-containing protein	N/A	0.96	0.067	0.178	4.65912	3.32946	4.95945	5.04816	13.6541	13.9675
TGME49_215450	aquaporin 1	N/A	0.76	0.000875	0.00754	13.099	12.9242	13.7416	13.8147	11.9948	11.94
TGME49_215460	ribosomal protein RPS24	RPS24	-0.38	0.357	0.546	9.98243	9.891	9.92745	9.06403	12.6216	13.1735
TGME49_215470	ribosomal protein RPL10A	RPL10A	-0.13	0.765	0.871	5.19712	5.25608	5.01891	5.18169	13.7057	14.3243
TGME49_215480	Adenosine/AMP deaminase domain-containing protein	N/A	0.27	0.35	0.539	10.3506	10.5231	10.604	10.8043	6.5333	6.76222
TGME49_215490	novel putative transporter NPT1	NPT1	0.86	0.0377	0.121	9.55697	9.41775	9.74358	10.7769	12.7909	12.9186
TGME49_215500	TPR repeat-containing protein	N/A	0.54	0.207	0.381	11.5664	11.1498	12.1246	11.6775	5.99116	4.98422
TGME49_215510	MraW methylase family protein	N/A	-0.06	0.836	0.913	12.7478	12.4201	12.649	12.4152	11.7077	11.8289
TGME49_215520	hypothetical protein	N/A	2.92	1.71e-08	2.8e-06	9.47832	8.44714	11.3126	12.4241	10.5576	10.5786
TGME49_215530	hypothetical protein	N/A	2.98	2.43e-06	8.83e-05	8.58325	6.81565	10.3221	11.3593	11.5241	11.9736
TGME49_215540	hypothetical protein	N/A	0.8	0.105	0.241	6.79325	6.95082	7.76174	7.52271	6.04776	6.64308
TGME49_215550	exonuclease V, putative	N/A	0.41	0.332	0.52	13.9279	13.4736	13.9445	14.2988	8.5803	7.58422
TGME49_215560	histone arginine methyltransferase PRMT5	PRMT5	-1.17	0.00546	0.0309	10.7633	10.4596	9.81662	8.96098	4.23386	4.05266
TGME49_215570	AP2 domain transcription factor AP2X-11	AP2X11	-0.19	0.637	0.784	10.6653	10.6157	10.0231	10.7769	7.13412	6.54679
TGME49_215590	flavoprotein subunit of succinate dehydrogenase SDHA	SDHA	1.49	0.0218	0.0829	3.25768	2.59194	4.61863	3.7902	10.7048	10.7118
TGME49_215600	hypothetical protein	N/A	-4.73	0.00243	0.0167	3.0245	3.00733	0	0	10.3025	10.7247
TGME49_215610	ATP synthase-associated protein	ICAP11	0.79	0.055	0.155	7.62923	8.47595	8.62124	9.13984	12.2558	12.3557
TGME49_215620	hypothetical protein	N/A	-0.74	0.229	0.407	8.36951	7.93907	6.75968	7.88773	4.72524	3.95599
TGME49_215640	zinc finger, C3HC4 type (RING finger) domain-containing protein	N/A	-0.83	0.0281	0.0993	12.2748	12.0633	11.3587	11.32	8.01721	7.13766
TGME49_215650	hypothetical protein	N/A	-2.38	0.253	NA	2.74623	4.59299	2.30094	1.3809	0.593608	0
TGME49_215660	hypothetical protein	N/A	-0.72	0.081	0.203	10.2959	9.75319	9.64794	8.93284	9.4718	9.68514
TGME49_215670	cAMP-dependent protein kinase	N/A	1.68	3.53e-07	2.41e-05	11.1056	11.0473	12.8823	12.6114	7.88676	8.49488
TGME49_215680	SAG-related sequence SRS18	SAG2E	-0.32	0.349	0.538	10.2926	10.6585	10.3912	9.8856	7.66228	7.67433
TGME49_215690	hypothetical protein	N/A	-0.95	0.00253	0.0172	10.7407	10.4861	9.71015	9.62922	8.9431	8.53308
TGME49_215700	phosphatidylinositol 3- and 4-kinase	N/A	-1.43	0.000233	0.00269	9.76535	9.19323	8.24526	7.87792	10.2044	9.83281
TGME49_215710	hypothetical protein	N/A	-0.9	0.00894	0.0442	7.35512	7.57818	6.77701	6.34368	11.5572	11.3921
TGME49_215730	Gas41, putative	N/A	-0.54	0.367	0.555	4.18022	4.32988	2.91577	4.33997	10.6349	10.6762
TGME49_215740	notchless, putative	N/A	-1.1	0.00668	0.0359	9.00405	9.01958	8.28819	7.39101	10.4181	10.4001
TGME49_215750	cytidine and deoxycytidylate deaminase zinc-binding region domain-containing protein	N/A	-1.24	0.0297	0.103	5.86037	5.68063	4.89742	4.09112	8.35886	8.32384
TGME49_215775	rhoptry protein ROP8	ROP8	2.05	0.000218	0.00259	6.63649	5.40049	7.5156	8.63396	12.2712	12.329
TGME49_215785	rhoptry protein ROP2A	ROP2A	4.2	4.06e-11	2.28e-08	2.74623	3.17737	6.40587	7.45836	10.9694	10.7325
TGME49_215885	hypothetical protein	N/A	3.66	2.91e-05	0.000564	14.3297	10.9749	16.249	17.6725	13.0788	12.9608
TGME49_215890	hypothetical protein	N/A	-0.99	0.00225	0.0157	13.2051	13.2306	12.4939	11.9087	11.775	11.465
TGME49_215895	AP2 domain-containing protein	N/A	2.57	7.79e-07	4.26e-05	5.01805	4.53157	6.70641	7.73314	13.231	13.8949
TGME49_215900	hypothetical protein	N/A	2.28	0.0592	0.164	1.27942	3.9147	5.58897	4.97645	5.48463	4.95949
TGME49_215910	hypothetical protein	N/A	0.13	0.673	0.813	9.41939	9.33927	9.34517	9.65816	11.6252	11.2702
TGME49_215920	hypothetical protein	N/A	0.17	0.64	0.787	10.1853	10.242	10.7082	9.96185	9.5156	9.39832
TGME49_215930	mediator complex subunit MED21	MED21	-1.11	0.0465	0.139	5.74991	5.17806	4.36729	4.44996	8.65871	8.75939
TGME49_215940	acetyl-CoA transporter AT1	AT1	0.51	0.111	0.249	11.6718	11.2432	11.7729	12.1641	6.75346	6.79752
TGME49_215950	hypothetical protein	N/A	-1.41	0.0108	0.0506	5.78768	6.73621	4.36729	5.41657	10.5571	10.6814
TGME49_215955	hypothetical protein	N/A	3.44	0.45	NA	0	0	0	2.53927	2.01938	1.88313
TGME49_215960	hypothetical protein	N/A	0.6	0.234	0.413	8.40031	7.33025	8.68229	8.41411	8.27837	8.62633
TGME49_215970	hypothetical protein	N/A	0.62	0.0622	0.169	6.5291	7.00831	7.54624	7.26124	14.7184	14.9234
TGME49_215980	hypothetical protein	N/A	-0.19	0.685	0.821	5.5881	6.21771	5.07603	6.19365	16.444	16.7846
TGME49_215990	helicase, putative	N/A	0.8	0.0986	0.232	5.78768	5.93897	6.55394	6.7614	7.5215	7.68568
TGME49_216000	alveolin domain containing intermediate filament IMC3	ALV3	2.57	0.000375	0.00391	6.61565	4.32988	7.82141	8.84999	11.987	11.4102
TGME49_216010	ribosomal protein RPL24	RPL24	-0.68	0.119	0.263	10.2695	9.97415	9.87612	8.82979	10.1039	10.1917
TGME49_216020	Ufm1-specific protease UFSP	UFSP	2.75	0.157	0.317	0	0	0	2.07335	7.88986	7.63974
TGME49_216030	VHS domain-containing protein	N/A	-1.35	0.00683	0.0365	8.16947	7.80275	7.04359	6.09552	9.99443	9.40406
TGME49_216040	30S ribosomal protein S15, putative	N/A	-0.85	0.0309	0.105	7.82356	8.54362	7.21865	7.53524	10.8483	10.9715
TGME49_216050	tetratricopeptide repeat-containing protein	N/A	-1.53	0.0544	0.154	3.93301	5.40049	4.06274	2.07335	9.67321	10.1154
TGME49_216053	hypothetical protein	N/A	0.79	0.35	0.539	5.30524	4.00785	5.62768	5.46977	5.48463	5.78954
TGME49_216055	hypothetical protein	N/A	2.65	0.236	0.415	1.27942	0	0	3.17338	10.8112	11.3287
TGME49_216060	hypothetical protein	N/A	2.24	7.83e-06	0.000214	4.88499	3.70817	6.65111	6.4534	10.7528	10.5212
TGME49_216070	transmembrane protein TqsA-like, putative	N/A	1.08	0.0133	0.0587	6.28688	6.72254	7.88671	7.24608	10.8756	10.3752
TGME49_216080	apical complex lysine methyltransferase	AKMT	1.43	0.000197	0.00239	8.21869	7.96253	9.09184	9.85094	12.803	13.1566
TGME49_216090	hypothetical protein	N/A	1.34	1.38e-06	6.26e-05	16.3326	16.3919	17.4575	17.912	10.5722	10.6562
TGME49_216120	hypothetical protein	N/A	-0.09	0.755	0.865	9.50973	9.67725	9.44068	9.57259	10.5136	10.7752
TGME49_216130	ubiquitin conjugating enzyme E2, putative	N/A	-0.05	0.857	0.927	13.9383	14.3761	14.2341	14.0016	12.7871	12.9302
TGME49_216140	tetratricopeptide repeat-containing protein ANK1	ANK1	-0.01	0.978	0.995	11.35	11.4652	11.5082	11.2684	8.36778	8.80347
TGME49_216150	peptidase family M3 protein	N/A	-0.12	0.703	0.833	16.7877	16.6605	16.811	16.3725	11.7282	11.3098
TGME49_216155	hypothetical protein	N/A	-0.08	0.778	0.881	15.7966	15.8973	15.9537	15.563	10.7664	10.5608
TGME49_216160	hypothetical protein	N/A	3.63	5.39e-06	0.000159	11.6775	8.7599	13.8464	14.9326	12.0143	12.3979
TGME49_216170	cysteine desulfurase NFS2	NFS2	0.58	0.0205	0.08	8.90443	8.89405	9.51743	9.44558	11.8719	11.9661
TGME49_216180	hypothetical protein	N/A	-0.56	0.11	0.249	11.5603	12.0755	11.5153	10.9899	14.6564	14.9708
TGME49_216190	hypothetical protein	N/A	0	1	NA	0	0	0	0	4.02419	3.79764
TGME49_216210	hypothetical protein	N/A	-0.97	0.311	0.497	4.18022	4.25586	3.94503	2.07335	6.69087	6.93701
TGME49_216220	AP2 domain transcription factor AP2XI-5	AP2XI5	0.18	0.524	0.698	16.0279	16.0951	15.9844	16.4657	11.909	11.754
TGME49_216240	hypothetical protein	N/A	-0.73	0.0293	0.102	11.6944	11.2851	11.0005	10.5127	8.09447	8.00545
TGME49_216250	RecF/RecN/SMC N terminal domain-containing protein	N/A	-0.51	0.0805	0.202	9.62114	9.56103	9.1824	8.96561	8.62934	8.68971
TGME49_216260	eukaryotic initiation factor-2B, gamma subunit, putative	N/A	-0.31	0.306	0.493	8.47745	8.30755	8.22647	7.9263	11.4607	11.6502
TGME49_216270	hypothetical protein	N/A	0.43	0.308	0.495	7.63959	8.00269	7.84625	8.60453	9.73484	9.90741
TGME49_216275	ACR, YggU family COG1872 domain-containing protein	N/A	0.01	0.975	0.993	8.11851	7.84754	8.18163	7.78653	9.82908	9.96288
TGME49_216280	adenylate cyclase alpha 2	N/A	-0.42	0.521	0.695	6.02754	6.43454	6.08262	5.52107	5.17481	5.36916
TGME49_216285	zinc finger, c2h2 type domain-containing protein	N/A	-0.38	0.45	0.633	5.82448	6.98558	6.38342	5.8367	12.0155	12.4309
TGME49_216290	hypothetical protein	N/A	-0.04	0.959	0.983	4.18022	4.40029	4.06274	4.44996	7.00286	6.8114
TGME49_216335	hypothetical protein	N/A	-0.35	0.494	0.673	7.22352	7.56292	6.5739	7.4318	8.1678	7.95319
TGME49_216370	golgi localizing protein GLP2	GLP2	0.1	0.747	0.861	12.5395	12.1166	12.6475	12.2117	10.3301	10.4392
TGME49_216375	hypothetical protein	N/A	-0.53	0.208	0.382	10.1888	9.95965	9.94289	9.00218	7.88986	7.97802
TGME49_216380	phospholipid-translocating P-type ATPase, flippase subfamily protein	ATP2A	0.69	0.285	0.47	5.82448	7.01953	6.26561	7.81765	11.2407	10.6696
TGME49_216390	RNA methyltransferase, TrmH family protein	N/A	3.69	0.0273	0.0972	0	0	2.64086	0	10.6624	10.6251
TGME49_216400	meiotic recombination protein DMC1 family protein	N/A	0.48	0.0435	0.133	16.1292	16.3681	16.7387	16.73	9.88451	9.75683
TGME49_216410	hypothetical protein	N/A	0.39	0.326	0.515	9.0397	9.86634	10.0519	9.73893	10.2075	10.0922
TGME49_216415	hypothetical protein	N/A	0.81	0.00198	0.0142	13.8045	13.7343	14.4912	14.6729	7.6659	7.30889
TGME49_216420	hypothetical protein	N/A	2.19	0.5	NA	1.94666	0	3.14658	2.53927	0	1.88313
TGME49_216430	TBC domain-containing protein TBC7	TBC7	-0.76	0.00731	0.0384	12.5491	12.3076	11.8001	11.5326	11.5589	11.2677
TGME49_216435	hypothetical protein	N/A	0.28	0.276	0.46	13.8349	13.911	14.2928	14.0078	10.865	11.0772
TGME49_216440	OTU domain-containing protein OTU8	OTU8	-0.62	0.147	0.304	14.4243	14.1027	14.1013	13.01	11.5131	11.4184
TGME49_216450	proteasome subunit alpha type-3, putative	N/A	0.39	0.213	0.387	11.5118	11.8093	11.789	12.2868	8.99871	9.05609
TGME49_216460	hypothetical protein	N/A	1.48	3.37e-11	2.04e-08	11.8187	11.8273	13.2736	13.3354	7.77386	7.73749
TGME49_216470	hypothetical protein	N/A	3.32	6.88e-06	0.000194	1.27942	2.81453	5.01891	5.66487	10.3192	10.7914
TGME49_216480	NMD3 family protein	N/A	0.64	0.00787	0.0402	14.0569	13.9154	14.5079	14.7402	10.3623	10.3505
TGME49_216490	hypothetical protein	N/A	-0.17	0.59	0.749	13.2213	13.8118	13.4918	13.2515	11.7103	11.7346
TGME49_216500	tRNA synthetase, putative	N/A	0.26	0.516	0.691	10.3474	9.75991	10.0661	10.5671	10.5	10.0148
TGME49_216510	thioredoxin, putative	N/A	-1.34	0.000307	0.00333	9.19885	9.21781	8.2138	7.41833	11.7132	11.5911
TGME49_216530	ribosome recycling factor protein	N/A	-1.98	0.000462	0.00459	8.07335	7.3121	6.36061	4.73709	11.8497	11.9099
TGME49_216540	dolichyl-phosphate beta-glucosyltransferase	N/A	-1.14	0.00659	0.0355	9.65218	9.22268	8.51682	8.07961	7.82657	7.28422
TGME49_216560	methyltransferase domain-containing protein	N/A	-1.33	0.0494	0.145	7.36765	6.57814	6.21565	4.90099	7.38757	7.50529
TGME49_216580	hypothetical protein	N/A	-1	0.0416	0.129	7.71013	7.92123	7.2807	6.12898	10.3403	9.98295
TGME49_216585	hypothetical protein	N/A	0.59	0.0162	0.0672	15.085	14.9477	15.6078	15.6113	8.73997	8.45785
TGME49_216590	HEAT repeat-containing protein	N/A	0.43	0.197	0.369	13.4206	13.0864	13.4121	13.927	11.1182	10.7738
TGME49_216600	exonuclease III APE	APE	-0.3	0.365	0.553	9.77714	9.41775	9.50708	9.07265	10.9639	10.78
TGME49_216610	ribosomal RNA large subunit methyltransferase J protein	N/A	0.68	0.0841	0.208	19.0426	18.6344	19.4136	19.6399	13.303	12.4235
TGME49_216620	EF hand domain-containing protein	N/A	3.14	1.49e-08	2.62e-06	6.08933	5.40049	8.40981	9.2655	8.87279	8.17072
TGME49_216630	trigger factor protein, putative	N/A	0.31	0.548	0.716	7.35512	7.46775	7.37475	8.00048	6.70501	6.10343
TGME49_216640	GHMP kinase, putative	N/A	0.74	0.00081	0.0071	17.0087	16.9253	17.643	17.7685	12.9012	12.9652
TGME49_216650	mature soluble cytoskeleton protein MSC1A	MSC1A	-0.16	0.707	0.835	8.14057	8.97702	8.77575	8.04498	14.2567	14.617
TGME49_216660	hypothetical protein	N/A	0.55	0.0332	0.111	16.6456	16.4341	16.9789	17.205	11.5513	11.3269
TGME49_216670	FUSE-binding protein 2 / KH-type splicing regulatory protein	FUBP2	0.29	0.469	0.652	9.83465	9.2728	10.118	9.5665	12.4698	11.9363
TGME49_216680	serine/threonine protein phosphatase 6 structural subunit PP6S	PP6S	-0.73	0.083	0.206	11.1802	10.8803	10.725	9.70605	10.5256	10.4503
TGME49_216700	peptide deformylase, putative	N/A	0.76	0.0701	0.184	10.6254	10.3292	11.2902	11.2071	5.38271	4.2693
TGME49_216710	apicomplexan amino acid transporter ApiAT5-4	ApiAT5-4	0.95	0.00817	0.0413	9.65218	9.52209	10.1112	10.8639	12.9819	13.1818
TGME49_216720	hypothetical protein	N/A	0.51	0.047	0.14	14.897	14.9901	15.4259	15.4905	16.3739	16.7328
TGME49_216730	DNA replication licensing factor MCM3, putative	MCM3	-0.04	0.891	0.946	10.8706	10.7346	10.8158	10.7162	10.9665	10.6048
TGME49_216740	riboflavin kinase	N/A	-1.78	2.39e-05	0.00049	10.3251	10.337	8.94243	7.97311	9.60507	9.38446
TGME49_216750	Paf1/RNA polymerase II complex component LEO1	LEO1	-0.93	0.0225	0.0848	8.78813	8.95672	8.324	7.4318	10.4336	10.4358
TGME49_216760	RNA pseudouridine synthase superfamily protein	N/A	-0.54	0.0828	0.206	12.0597	12.2766	11.874	11.3443	10.3789	10.2661
TGME49_216770	hypothetical protein	N/A	-1.17	0.579	0.741	1.27942	0	0	0	8.17798	8.07615
TGME49_216780	hypothetical protein	N/A	-0.93	0.0165	0.0682	9.06299	8.96546	8.39305	7.66635	10.1172	9.88707
TGME49_216785	hypothetical protein	N/A	0.35	0.208	0.381	11.4498	11.1651	11.7373	11.5795	7.26879	7.44423
TGME49_216790	ATP-binding cassette sub-family E member 1, putative	N/A	0.44	0.0758	0.194	14.1069	13.8689	14.3324	14.5272	10.5126	10.5275
TGME49_216800	flagellar/basal body protein	N/A	0.3	0.48	0.66	7.44059	7.51612	7.6249	7.88773	6.27338	6.06917
TGME49_216810	5'-nucleotidase, C-terminal domain-containing protein	N/A	0.29	0.339	0.528	11.5967	11.5625	11.6861	12.0272	9.93039	9.54573
TGME49_216820	transporter facilitator protein TFP1	TFP1	1.29	1.33e-06	6.07e-05	11.0801	10.9122	12.1136	12.445	13.7199	13.8489
TGME49_216830	DTW domain-containing protein	N/A	0.6	0.0261	0.0938	11.6813	11.7658	12.2373	12.4076	9.64872	9.97681
TGME49_216840	hypothetical protein	N/A	-1.39	0.000747	0.00669	8.33166	8.51614	7.31669	6.67344	9.5246	9.1803
TGME49_216850	hypothetical protein	N/A	-0.31	0.753	0.864	4.95306	4.00785	4.17156	4.33997	5.7935	4.95949
TGME49_216860	DEAD (Asp-Glu-Ala-Asp) box polypeptide DDX39	DDX39	-0.13	0.634	0.783	10.9256	11.0879	11.0423	10.7093	14.3618	14.5402
TGME49_216870	DNA excision repair helicase	N/A	0.29	0.323	0.511	12.1795	11.9727	12.2377	12.492	10.9818	10.5903
TGME49_216875	cpw-wpc domain-containing protein	N/A	1.36	0.000135	0.00174	14.9641	14.9535	15.8611	16.6681	9.30883	9.14099
TGME49_216880	POC1 centriolar protein, putative	POC1	-0.01	0.983	0.998	8.13325	7.94497	8.22647	7.80735	7.2924	7.72288
TGME49_216890	hypothetical protein	N/A	-0.32	0.198	0.37	12.9362	13.0447	12.7856	12.5568	13.1984	13.3474
TGME49_216900	cytokine induced apoptosis inhibitor 1 family protein	N/A	0.57	0.0417	0.129	13.5373	13.4249	13.9304	14.1657	13.164	13.5494
TGME49_216910	hypothetical protein	N/A	-0.52	0.116	0.259	10.6691	10.9062	10.5254	9.9572	14.513	14.8555
TGME49_216920	mediator complex subunit MED8	MED8	-0.46	0.213	0.387	13.4885	13.8126	13.4702	12.8633	12.1157	12.6579
TGME49_216930	cholinephosphate cytidylyltransferase	N/A	0.18	0.473	0.655	14.5541	14.6507	14.7945	14.7722	12.3669	12.6817
TGME49_216940	hypothetical protein	N/A	1.26	0.000342	0.00365	15.6209	15.6165	16.4229	17.2213	9.8736	9.95117
TGME49_216950	helicase	N/A	0.79	0.00623	0.034	9.7463	9.46574	10.3382	10.4594	8.21305	8.11305
TGME49_216960	elongation factor Tu GTP binding domain-containing protein	N/A	-0.26	0.398	0.586	9.74869	9.70185	9.65966	9.21576	9.89535	9.78172
TGME49_216965	leucine rich repeat-containing protein	N/A	-1.43	0.00162	0.0121	9.36733	10.2587	8.60678	8.27159	7.22528	7.5963
TGME49_216970	coronin, putative	N/A	0.56	0.234	0.412	8.48322	9.11426	8.72309	9.85094	13.9315	14.2268
TGME49_216980	WDR8 protein isoform 3 family protein	N/A	-0.92	0.0849	0.21	7.38006	8.37467	7.08591	7.03286	6.42636	6.37048
TGME49_216990	LysM domain-containing protein	N/A	-0.56	0.079	0.199	12.4974	12.4495	12.1851	11.581	9.92133	9.76488
TGME49_217000	hypothetical protein	N/A	0.43	0.126	0.273	14.3115	14.3307	14.5708	14.9063	11.8196	12.1417
TGME49_217010	CD2BP2-like protein	N/A	-1.22	0.00128	0.0101	10.2202	10.0487	9.25221	8.47392	12.0207	12.3722
TGME49_217020	ATPase, AFG1 family protein	N/A	0.22	0.413	0.599	10.2357	10.2444	10.325	10.5838	10.1245	10.0245
TGME49_217030	hypothetical protein	N/A	-0.7	0.0582	0.162	11.7794	11.825	11.4193	10.7093	11.7817	12.2215
TGME49_217040	hypothetical protein	N/A	1.71	5.13e-05	0.00087	14.5607	14.7967	15.7507	16.8312	8.78894	8.9981
TGME49_217050	ADA2-A transcriptional co-activator SAGA component	N/A	-1.2	0.000104	0.00145	9.88561	9.80602	8.60678	8.69107	11.634	11.1818
TGME49_217160	Der1 family protein	N/A	0.08	0.775	0.879	14.0111	14.0313	14.0459	14.1592	12.7547	13.2303
TGME49_217220	zinc finger, C3HC4 type (RING finger) domain-containing protein	N/A	-0.15	0.634	0.783	7.64988	7.33025	7.18009	7.49732	11.9054	11.8868
TGME49_217340	hypothetical protein	N/A	-1.61	1.65e-06	7.02e-05	8.29279	8.17325	6.68821	6.57976	10.6238	10.3433
TGME49_217350	N6-adenosine-methyltransferase subunit METTL3	METTL3	-1.28	0.00161	0.0121	7.12369	6.91519	5.90489	5.57062	10.1238	9.79663
TGME49_217360	hypothetical protein	N/A	1	0.108	0.246	7.62923	6.81565	7.5361	8.7621	8.93862	8.1408
TGME49_217370	hypothetical protein	N/A	4.76	0.0939	NA	0	0	2.30094	3.17338	2.34259	2.78978
TGME49_217380	hypothetical protein	N/A	2.95	0.00954	0.0463	4.73841	2.00628	5.87301	7.33477	4.41688	4.45761
TGME49_217390	hypothetical protein	N/A	0.75	0.199	0.372	8.52853	7.01953	8.94627	8.46084	8.32491	8.36677
TGME49_217400	hypothetical protein	N/A	0.68	0.135	0.286	7.82356	8.17325	8.11506	9.10664	10.9338	11.3458
TGME49_217410	hypothetical protein	N/A	0.3	0.849	0.922	2.40114	4.32988	2.64086	4.64758	3.27102	2.07947
TGME49_217420	hypothetical protein	N/A	-0.15	0.698	0.829	11.0039	11.5801	10.8864	11.4113	8.19812	8.58451
TGME49_217430	protease inhibitor PI1	PI1	0.63	0.0604	0.166	10.4392	10.8293	11.0152	11.5026	10.5005	10.7242
TGME49_217440	HCNGP family protein	N/A	-0.18	0.486	0.665	13.197	12.983	13.0009	12.8204	12.5443	12.7701
TGME49_217450	general transcription factor IIH polypeptide 5 GTF2H5	GTF2H5	0.35	0.247	0.427	11.1767	11.5966	11.6913	11.8052	12.0408	12.3323
TGME49_217460	glutaminyl-tRNA synthetase (GlnRS)	N/A	0.81	0.216	0.392	4.0619	3.00733	4.53962	4.09112	9.13165	9.33726
TGME49_217470	hypothetical protein	N/A	0.81	0.111	0.249	5.30524	5.81558	5.77293	6.82403	10.4692	10.6605
TGME49_217480	hypothetical protein	N/A	-0.79	0.14	0.294	11.463	10.4472	10.6957	9.61158	11.1106	10.5359
TGME49_217490	hypothetical protein	N/A	1.41	8.32e-05	0.00124	15.4135	15.5408	16.4229	17.2382	10.1844	10.2892
TGME49_217500	HMG (high mobility group) box domain-containing protein	N/A	-0.25	0.5	0.677	8.54517	8.81892	8.76277	8.00949	11.6072	11.7554
TGME49_217510	inner membrane complex protein IMC19	IMC19	0.82	0.00476	0.0277	13.9774	13.6863	14.6265	14.6898	15.3857	15.8105
TGME49_217520	hypothetical protein	N/A	1.74	8.68e-07	4.59e-05	8.57787	8.01957	9.91381	10.189	9.42128	9.44248
TGME49_217530	dense granule protein GRA63	GRA63	0.21	0.444	0.628	9.57868	9.95234	9.90792	10.067	16.1186	16.0981
TGME49_217540	serine/arginine-rich splicing factor SR2	SR2	0.41	0.158	0.317	11.9783	12.3812	12.4605	12.7289	12.3335	12.4228
TGME49_217550	dynactin subunit 6, putative	N/A	-0.54	0.12	0.263	12.1206	12.4645	12.0293	11.4407	13.2474	13.5861
TGME49_217555	hypothetical protein	N/A	0.11	0.765	0.871	11.5562	12.0815	11.7184	12.1489	11.9979	12.3878
TGME49_217560	DNA-directed RNA polymerase II RPB10	POLR2L	0.38	0.519	0.694	4.28956	5.93897	5.33191	6.06127	11.8732	12.3025
TGME49_217570	ribosomal protein RPS27	RPS27	-1.08	0.0129	0.0576	9.00003	9.14535	8.37609	7.47147	12.818	13.4919
TGME49_217580	DNA-directed RNA polymerase III RPC6	POLR3F	-0.54	0.0851	0.21	12.1206	12.1502	11.8537	11.2843	10.9654	11.1353
TGME49_217590	50S ribosomal protein L17, putative	N/A	0.36	0.148	0.305	10.8507	10.9921	11.1959	11.3593	10.8942	10.8953
TGME49_217600	calcium-dependent protein kinase CDPK9	CDPK9	0.43	0.0686	0.181	13.4958	13.4619	13.7833	14.0359	13.6771	13.7381
TGME49_217610	hypothetical protein	N/A	-0.42	0.315	0.502	7.41668	7.89098	7.2562	7.26124	9.68486	10.2867
TGME49_217620	translation initiation factor IF-1, putative	N/A	0.48	0.206	0.38	10.6044	10.2251	11.227	10.4935	8.61068	8.6727
TGME49_217630	hypothetical protein	N/A	0.31	0.637	0.784	5.89539	5.40049	5.90489	6.02619	5.57983	5.81733
TGME49_217640	hypothetical protein	N/A	3.05	5.06e-06	0.000154	7.90314	6.21771	9.35674	10.9091	14.2625	14.6666
TGME49_217650	GAS8 domain-containing protein	N/A	-0.33	0.422	0.608	8.90443	9.63954	9.08837	8.86992	6.31086	6.54679
TGME49_217660	Tctex-1 family protein	N/A	1.2	0.0649	0.174	4.57522	3.70817	4.61863	5.8367	10.8424	11.8164
TGME49_217665	hypothetical protein	N/A	0.03	0.901	0.952	13.3309	13.3695	13.5157	13.2415	11.4834	11.8175
TGME49_217670	ribosomal protein RPS6	RPS6	-1	0.0384	0.122	11.6913	11.2622	10.9931	9.7335	10.0695	9.87142
TGME49_217680	dense granule protein GRA57	GRA57	0.67	0.242	0.422	4.0619	3.17737	3.94503	4.55215	13.5281	13.1375
TGME49_217688	hypothetical protein	N/A	2.45	0.213	0.387	4.57522	0	4.53962	6.67344	9.89072	9.74784
TGME49_217692	hypothetical protein	N/A	-1.09	0.621	0.772	4.3912	0	3.34551	0	5.40021	5.65744
TGME49_217700	AP2 domain transcription factor AP2XII-2	AP2XII2	1.49	0.0261	0.0938	8.46585	7.47593	9.17915	9.8231	6.36532	4.74481
TGME49_217710	DnaJ domain-containing protein	N/A	0.53	0.296	0.482	7.78673	8.68783	8.39305	9.18428	8.12898	8.37381
TGME49_217720	hypothetical protein	N/A	-2.1	0.225	0.402	2.74623	1.00419	0	1.3809	7.59551	7.91191
TGME49_217722	hypothetical protein	N/A	0	1	NA	0	0	0	0	3.02259	2.67299
TGME49_217724	hypothetical protein	N/A	1.68	0.585	NA	0	0	1.20743	0	4.66862	3.95599
TGME49_217726	hypothetical protein	N/A	5.49	0.0178	0.0722	0	0	2.30094	4.09112	4.34643	4.00513
TGME49_217728	hypothetical protein	N/A	5.61	0.0241	0.0893	0	0	2.30094	4.2209	4.54823	2.67299
TGME49_217730	WD repeat-containing protein	N/A	0.79	0.386	0.574	2.74623	3.46704	3.67619	4.09112	6.55689	6.65852
TGME49_217740	3-ketoacyl-(acyl-carrier-protein) reductase	N/A	-5.97	0.00402	0.0243	3.0245	4.76295	0	0	4.5165	5.2106
TGME49_217760	GTP-binding protein	N/A	-0.57	0.318	0.507	5.74991	5.50004	4.53962	5.18169	8.12372	7.67053
TGME49_217770	hypothetical protein	N/A	-1.06	0.0658	0.176	7.41668	7.19814	5.77293	6.47957	8.48309	7.65136
TGME49_217780	Sec20 protein	N/A	-0.96	0.00724	0.0382	11.7049	11.5122	10.9847	10.232	11.2934	11.219
TGME49_217790	S1 RNA binding domain-containing protein	N/A	-0.48	0.354	0.543	7.93715	8.53583	7.78761	7.78653	7.94752	6.9929
TGME49_217800	hypothetical protein	N/A	0.57	0.0314	0.106	14.0497	13.7624	14.4222	14.5505	10.3158	10.5613
TGME49_217820	PCI domain-containing protein	N/A	0.31	0.263	0.446	11.7468	11.3348	11.8669	11.8709	10.537	10.571
TGME49_217830	hypothetical protein	N/A	-0.19	0.72	0.843	5.92958	6.74976	5.62768	6.65058	11.0091	10.6691
TGME49_217850	Sucrose-6F-phosphate phosphohydrolase	N/A	0.61	0.0447	0.135	10.1764	10.5201	10.7635	11.1532	11.4952	11.5585
TGME49_217855	hypothetical protein	N/A	-2.4	0.622	NA	1.94666	0	0	0	1.82582	0.620822
TGME49_217860	hypothetical protein	N/A	-0.41	0.348	0.538	12.5066	12.5424	11.879	12.3198	7.10241	5.98594
TGME49_217870	palmitoyltransferase DHHC3	DHHC3	-0.23	0.472	0.654	13.2187	13.1148	13.2176	12.601	12.5781	12.5727
TGME49_217875	hypothetical protein	N/A	-1.56	0.0149	0.0636	8.56161	8.47595	7.55631	5.91551	6.4931	6.15877
TGME49_217880	RNA-binding protein Nova-1, putative	N/A	-1.07	0.0251	0.0917	11.2196	11.0349	10.5696	9.28047	9.76722	9.67378
TGME49_217890	peroxiredoxin PRX1	PRX1	2.97	3.21e-08	4.29e-06	8.9342	8.97414	10.8602	12.5289	15.2463	15.4313
TGME49_217900	hypothetical protein	N/A	-0.05	0.85	0.922	13.7704	14.0037	13.9304	13.7492	10.0619	9.81913
TGME49_217910	DNA polymerase (pol2) superfamily protein	N/A	-0.83	0.0433	0.132	11.463	10.7557	10.5458	10.0583	11.3561	10.8252
TGME49_217940	hypothetical protein	N/A	0.97	0.18	0.348	3.25768	3.17737	4.53962	3.40951	8.80051	9.15875
TGME49_217951	hypothetical protein	N/A	0.13	0.956	0.982	5.19712	0	4.76475	3.7902	1.82582	0
TGME49_217961	hypothetical protein	N/A	0.97	0.162	0.324	2.40114	4.59299	4.95945	4.73709	9.83713	9.81138
TGME49_218000	hypothetical protein	N/A	-0.82	0.0127	0.057	13.2436	12.863	12.1153	12.3665	8.89763	8.4016
TGME49_218070	hypothetical protein	N/A	-1.54	0.000529	0.00507	9.41637	9.10111	7.91046	7.53524	9.72619	8.9073
TGME49_218130	hypothetical protein	N/A	0	1	1	0	0	0	0	6.64758	5.47761
TGME49_218200	UDP-sugar pyrophospharylase	N/A	0.12	0.665	0.806	14.5124	14.353	14.3423	14.7381	13.5835	13.4778
TGME49_218210	Chromosome-associated kinesin KLP1, putative	N/A	0.76	0.229	0.407	6.26026	6.46771	7.52588	6.55536	4.60968	4.65528
TGME49_218215	hypothetical protein	N/A	-0.14	0.637	0.784	12.6342	12.3147	12.5134	12.1646	9.9183	9.94489
TGME49_218220	CDK-related protein kinase CRK2	CRK2	0.91	0.0152	0.0644	9.57868	9.52406	10.014	10.7952	12.0161	12.3103
TGME49_218230	histone lysine methyltransferase, SET, putative	N/A	0.28	0.545	0.715	5.13987	4.70849	5.46616	4.73709	11.4391	11.5978
TGME49_218240	inner membrane complex protein IMC25	IMC25	0.12	0.738	0.855	14.5435	14.4857	14.489	14.7729	10.0152	9.1883
TGME49_218250	TAP42 family protein	N/A	-0.41	0.137	0.289	11.1488	11.5206	10.9912	10.8897	11.4103	11.4286
TGME49_218260	histone H3.3	N/A	0.43	0.107	0.244	17.0997	17.0824	17.4934	17.5472	15.9367	16.3455
TGME49_218270	rhoptry protein ROP48	ROP48	1.43	0.0095	0.0461	6.59449	6.17818	7.11345	8.30856	8.83308	8.76118
TGME49_218280	mitochondrial import receptor subunit TOM40	TOM40	-0.06	0.892	0.947	8.82945	8.74306	9.17588	8.07961	10.2778	10.6866
TGME49_218290	WD domain, G-beta repeat-containing protein	N/A	1.38	0.000353	0.00373	9.87687	9.49016	10.6529	11.3899	8.88215	9.03258
TGME49_218300	zinc finger (CCCH type) motif-containing protein	N/A	0.67	0.053	0.152	12.2211	12.1296	12.4269	13.1777	11.8376	11.7112
TGME49_218350	hypothetical protein	N/A	0	1	1	0	0	0	0	4.57928	4.71558
TGME49_218358	zinc finger protein ZFP1	ZFP1	1.42	0.136	0.287	2.74623	0	2.64086	3.17338	12.04	12.4764
TGME49_218362	zinc finger protein	N/A	3.31	0.0132	0.0584	9.62636	5.81558	11.2849	12.5206	10.4062	9.772
TGME49_218400	NEK kinase	N/A	0.01	0.97	0.99	16.9669	16.4449	16.4842	16.9654	10.7236	10.0642
TGME49_218410	ribosomal protein RPP0	RPP0	-0.88	0.0466	0.139	9.43435	8.8601	8.69602	7.74398	11.4184	11.512
TGME49_218420	pre-mRNA-splicing factor PRP46, putative	N/A	-0.19	0.426	0.611	12.6358	12.7701	12.6082	12.408	12.4496	12.5759
TGME49_218450	hypothetical protein	N/A	3.89	0.00246	0.0169	9.96605	6.31205	12.2521	13.4378	9.15888	8.77895
TGME49_218460	hypothetical protein	N/A	3.78	8.67e-07	4.59e-05	7.38006	4.91498	9.8941	10.7435	6.45175	5.91056
TGME49_218470	protein disulfide-isomerase, putative	N/A	0.92	0.00643	0.0349	11.1425	11.432	12.054	12.3591	10.9591	11.5112
TGME49_218490	hypothetical protein	N/A	-1.22	0.0231	0.0863	6.90056	6.98558	6.1639	5.11647	9.56102	8.98285
TGME49_218500	hypothetical protein	N/A	-0.56	0.169	0.333	10.3458	10.6432	10.3206	9.42215	10.1621	10.3694
TGME49_218510	hypothetical protein	N/A	1.29	0.000507	0.00493	15.292	15.3892	16.1366	17.003	9.25816	9.45579
TGME49_218520	microneme protein MIC6	MIC6	0.34	0.256	0.438	10.6474	10.3769	11.0106	10.6814	15.9718	16.3004
TGME49_218530	proteasome-interacting thioredoxin domain-containing protein	N/A	-2.1	0.19	0.361	4.3912	2.81453	1.20743	2.53927	3.882	3.90511
TGME49_218540	peptidase S15, putative	N/A	-1.29	0.326	0.515	3.93301	4.81543	3.52031	2.89088	2.01938	2.54591
TGME49_218550	PIK3R4 kinase-related protein	N/A	1.63	1.56e-07	1.34e-05	6.50663	6.21771	8.06657	7.89747	13.5219	13.2967
TGME49_218560	acetyl-coA carboxylase ACC2	ACC2	-0.08	0.851	0.923	10.5601	10.6966	10.0067	10.9495	11.6728	11.2979
TGME49_218570	Nin one binding (NOB1) Zn-ribbon family protein	N/A	-0.01	0.982	0.997	10.9075	10.6148	10.8169	10.7052	11.6271	11.9933
TGME49_218580	RNA methyltransferase, TrmH family protein	N/A	-1.91	0.038	0.122	5.89539	3.9147	2.91577	3.7902	8.33404	7.80496
TGME49_218590	protein phosphatase PPM8	PPM8	0.21	0.432	0.618	14.545	14.3389	14.5124	14.7952	10.8849	10.6201
TGME49_218600	RNA recognition motif-containing protein	N/A	1.69	0.0778	0.197	3.63451	0	4.61863	3.7902	9.41376	9.65466
TGME49_218610	ATPase (DUF699) protein	N/A	5.18	0.124	0.27	0	0	0	4.09112	8.91447	8.54973
TGME49_218720	calcium-dependent protein kinase CDPK6	CDPK6	0	0.995	1	6.69729	6.74976	6.42797	6.97884	13.379	13.0908
TGME49_218730	hypothetical protein	N/A	0.58	0.014	0.0606	14.5205	14.5692	15.0103	15.2364	14.1622	14.2781
TGME49_218740	membrane protein, putative	N/A	2.84	0.0778	0.197	6.69729	1.59055	8.10824	8.88957	11.9221	12.1185
TGME49_218750	nucleoside triphosphate hydrolase, putative	N/A	2.59	8.21e-07	4.44e-05	10.6176	9.63954	12.0486	13.2954	12.0022	12.1334
TGME49_218760	alpha-soluble NSF attachment protein	alphaSNAP	-0.43	0.148	0.305	10.4062	10.2763	10.0519	9.76043	11.6056	11.9505
TGME49_218770	carrier superfamily protein	N/A	0.13	0.629	0.78	10.6123	10.328	10.5496	10.6658	9.3261	9.28723
TGME49_218780	phosphoserine aminotransferase, putative	N/A	-0.05	0.902	0.952	9.23689	9.67192	9.67361	9.09822	6.46843	6.06917
TGME49_218790	elongation factor G C-terminus domain-containing protein	N/A	0.73	0.202	0.374	5.30524	5.59316	6.21565	6.12898	7.21543	6.87887
TGME49_218800	hypothetical protein	N/A	1.24	0.0616	0.168	3.63451	3.17737	4.27274	4.82137	8.79391	8.54766
TGME49_218810	histidyl-tRNA synthetase	N/A	0.08	0.903	0.952	6.26026	6.00824	6.49233	5.87664	5.75322	6.60374
TGME49_218820	alba 2	N/A	-0.2	0.646	0.791	8.34439	9.42832	8.74086	8.84497	14.2316	14.4934
TGME49_218830	hypothetical protein	N/A	-0.69	0.0692	0.182	7.0787	7.06359	6.44975	6.19365	9.99802	9.77731
TGME49_218840	mutS domain protein	MSH1	0.12	0.771	0.876	11.3389	10.4811	11.3289	10.8056	9.62473	9.83451
TGME49_218850	ribosomal protein RPS9	RPS9	0.41	0.269	0.451	11.3309	10.7414	11.7285	11.1704	8.56487	8.65933
TGME49_218860	hypothetical protein	N/A	1.57	3.31e-05	0.000624	13.9551	14.1594	15.1276	16.0057	8.23515	8.41984
TGME49_218870	TBC domain-containing protein TBC3	TBC3	-0.73	0.0874	0.214	12.7894	12.8329	12.5196	11.4407	11.1294	11.4716
TGME49_218880	striated fiber assemblin SFA3	SFA3	0.89	0.00114	0.0093	13.3217	13.1993	14.0443	14.2488	9.5918	9.21987
TGME49_218890	hypothetical protein	N/A	1.67	1.16e-05	0.000286	9.68757	9.02516	11.2504	10.8476	5.23455	5.33113
TGME49_218900	hypothetical protein	N/A	0.34	0.587	0.747	7.54352	6.89094	7.18009	7.90715	2.82948	3.61974
TGME49_218910	hypothetical protein	N/A	-0.24	0.663	0.805	6.05876	6.13753	6.19001	5.41657	8.34988	9.06336
TGME49_218920	proteasome subunit beta type-5, putative	N/A	0.11	0.669	0.809	12.2577	12.0452	12.2895	12.2344	12.0184	12.2043
TGME49_218930	BTB/POZ domain-containing protein	N/A	-0.89	0.0596	0.164	10.2098	10.7456	10.0448	8.98401	7.11835	7.38513
TGME49_218940	ATP synthase-associated protein	ICAP8	-0.3	0.514	0.689	8.51171	9.53974	8.62603	8.98858	10.1894	10.5037
TGME49_218950	hypothetical protein	N/A	0.35	0.397	0.584	9.72212	8.86633	9.88013	9.51681	9.05916	9.11883
TGME49_218955	hypothetical protein	N/A	2.36	1.1e-07	1.08e-05	10.6189	11.0383	12.557	13.6502	5.88332	6.12582
TGME49_218960	AP2 domain transcription factor AP2XII-1	AP2XII1	0.39	0.315	0.502	13.4331	13.188	13.4687	13.9082	11.3839	10.571
TGME49_219070	cyclic nucleotide-binding domain-containing protein	N/A	2.38	4.48e-08	5.51e-06	7.53244	6.87866	9.09875	9.98487	13.1448	12.9647
TGME49_219080	Golgi to ER traffic protein GET4, putative	N/A	-0.17	0.506	0.684	13.0631	13.1131	13.0713	12.7509	11.0929	11.1694
TGME49_219090	hypothetical protein	N/A	0.71	0.595	0.752	4.57522	3.32946	5.13096	4.2209	0.593608	1.65581
TGME49_219100	cyclin-dependent kinase regulatory subunit protein	N/A	0.02	0.947	0.977	15.0513	15.2142	15.3351	14.9483	9.79228	9.5806
TGME49_219110	hypothetical protein	N/A	1.06	9.02e-06	0.000238	15.7294	15.8301	16.7112	16.9672	9.69109	9.70758
TGME49_219120	zinc finger (CCCH type) motif-containing protein	N/A	1.38	0.000255	0.00287	7.09385	6.34812	8.17511	8.07961	11.2823	11.3878
TGME49_219130	NADPH-glutathione reductase	N/A	3.31	1.76e-08	2.83e-06	5.92958	4.53157	7.94153	9.12748	12.5799	12.7794
TGME49_219140	EF-1 guanine nucleotide exchange domain-containing protein	N/A	-0.54	0.0965	0.228	11.8768	12.2836	11.706	11.3907	13.3248	13.7302
TGME49_219150	zinc finger, zz type domain-containing protein	N/A	0.25	0.415	0.602	8.26628	8.00834	8.18163	8.59259	12.2532	12.1472
TGME49_219160	hypothetical protein	N/A	1.23	0.000583	0.00551	16.3628	16.4138	17.1483	17.9731	10.4604	10.5608
TGME49_219170	IMC sutures component ISC2	ISC2	0.33	0.602	0.756	4.18022	4.9623	3.94503	5.57062	11.2358	11.6639
TGME49_219180	acetyltransferase, GNAT family protein	N/A	-0.22	0.651	0.795	7.1957	7.68076	7.24379	7.26124	7.65501	8.28208
TGME49_219190	nuclear movement protein domain containing protein	N/A	0.4	0.107	0.244	14.2259	14.4804	14.774	14.7384	12.8382	13.01
TGME49_219200	DEAD/DEAH box RNA helicase family protein	N/A	-0.88	0.0683	0.181	8.29934	8.18327	7.86257	6.57976	12.408	12.9011
TGME49_219210	ankyrin repeat-containing protein	N/A	-5.9	0.000118	0.00158	3.25768	4.53157	0	0	11.6067	11.8126
TGME49_219230	AMP-binding enzyme domain-containing protein	N/A	-0.2	0.547	0.716	16.4884	16.2934	16.5026	15.7965	13.7929	13.8956
TGME49_219240	Peptidyl-tRNA hydrolase PTH2 domain-containing protein	N/A	-0.52	0.295	0.481	6.46061	5.62291	5.87301	5.18169	10.724	11.1555
TGME49_219250	acetyltransferase, GNAT family protein	N/A	0.53	0.0726	0.189	10.5737	11.048	11.2582	11.4515	13.9312	13.9831
TGME49_219260	cation-transporting ATPase, putative	N/A	-0.17	0.59	0.749	9.51537	9.63041	9.15946	9.61453	10.0412	9.937
TGME49_219270	glideosome-associated protein with multiple-membrane spans GAPM2A	GAPM2A	0.89	0.0013	0.0102	13.7414	13.7515	14.501	14.7666	10.4051	10.0253
TGME49_219280	actin like protein ALP1	ALP1	-0.21	0.474	0.656	12.8967	12.661	12.789	12.3202	12.7845	12.8557
TGME49_219290	F-actin-capping protein subunit beta, putative	N/A	-0.66	0.0396	0.125	10.2046	10.1492	9.75674	9.22739	10.7162	10.8941
TGME49_219300	ran binding protein	N/A	-1.54	0.0016	0.012	8.75037	8.86633	7.69037	6.69594	7.77386	7.50955
TGME49_219310	DnaK family protein	N/A	-1.24	0.00189	0.0137	8.08098	8.43461	7.2807	6.71809	9.69552	9.50253
TGME49_219320	gliding-associated protein GAP50	GAP50	1.82	0.000416	0.00423	7.27761	6.13753	8.08059	9.01566	12.0623	11.9838
TGME49_219348	SAG-related sequence SRS55M	SRS55M	4.05	0.00368	0.0227	4.65912	0	6.68821	8.20256	4.11174	4.71558
TGME49_219370	hypothetical protein	N/A	-1.17	0.012	0.0544	8.1766	8.27981	7.43056	6.57976	8.04249	8.14354
TGME49_219430	tRNA ligase class II core domain (G, H, P, S and T) domain-containing protein	N/A	-0.76	0.107	0.244	7.18158	6.34812	6.13732	5.99023	9.9334	9.65466
TGME49_219440	hypothetical protein	N/A	-1.45	9.83e-05	0.00138	9.85703	9.65941	8.10137	8.52508	10.2925	9.81052
TGME49_219450	WD domain, G-beta repeat-containing protein	N/A	0.63	0.319	0.507	6.46061	5.84111	6.65111	6.94167	5.5951	6.33248
TGME49_219460	hypothetical protein	N/A	-0.62	0.0502	0.146	13.7604	13.8039	12.8425	13.4336	9.16016	8.98438
TGME49_219485	peptidase, putative	N/A	-0.47	0.395	0.582	7.40458	7.84122	6.72439	7.52271	6.32924	6.82515
TGME49_219500	hypothetical protein	N/A	0.88	0.21	0.384	7.90314	9.2728	8.47496	10.2606	8.64594	9.07635
TGME49_219510	GTP binding protein 7 isoform 2 family protein, putative	N/A	-2	0.307	0.494	1.94666	2.00628	0	1.3809	5.23455	5.8035
TGME49_219520	histone arginine methyltransferase PRMT1	PRMT1	0	0.997	1	7.45239	7.96253	7.09975	8.17879	11.013	10.9895
TGME49_219530	hypothetical protein	N/A	0	1	1	0	0	0	0	5.66913	5.4244
TGME49_219540	cytosolic tRNA-Ala synthetase	N/A	-1.17	0.285	0.47	3.0245	2.00628	1.8554	1.3809	9.42235	9.27976
TGME49_219550	dihydrolipoyllysine-residue succinyltransferase component of oxoglutarate dehydrogenase	N/A	0.33	0.169	0.333	12.2552	12.183	12.5073	12.6003	13.4229	13.6622
TGME49_219570	hypothetical protein	N/A	0.32	0.33	0.519	8.39421	8.41349	8.6403	8.80929	10.2931	10.7443
TGME49_219590	RuvB family 1 protein	N/A	-0.56	0.128	0.275	10.05	10.2056	9.87813	9.16828	10.1092	10.3623
TGME49_219600	hypothetical protein	N/A	-1.51	0.00184	0.0135	5.67127	5.33009	4.27274	3.7902	11.0415	11.0054
TGME49_219610	hypothetical protein	N/A	0.76	0.0067	0.0359	15.9645	16.3672	16.8128	17.0556	11.5048	11.5911
TGME49_219620	hypothetical protein	N/A	-0.09	0.783	0.884	10.9807	10.964	11.1409	10.5777	12.454	12.6279
TGME49_219630	flavodoxin domain-containing protein	N/A	0.12	0.781	0.883	9.94948	10.8309	10.1432	10.9163	12.3778	12.1286
TGME49_219640	RING zinc finger protein	N/A	-0.23	0.477	0.657	12.4115	12.279	12.2993	11.9171	12.0356	11.5484
TGME49_219650	transporter, small conductance mechanosensitive ion channel (MscS) family protein	N/A	-0.38	0.384	0.573	11.082	10.5943	10.9121	9.8434	12.1132	12.0376
TGME49_219660	hypothetical protein	N/A	1.28	0.261	0.444	4.0619	3.00733	4.83261	4.82137	4.06863	3.18051
TGME49_219670	zinc finger (CCCH type) motif-containing protein	N/A	3.31	1.63e-07	1.37e-05	12.444	10.7278	14.3812	15.6294	12.3637	11.9911
TGME49_219678	hypothetical protein	N/A	-0.87	0.0119	0.0542	8.82945	8.60826	7.83801	7.87792	8.39639	8.18679
TGME49_219682	pyruvate dehydrogenase kinase, putative	N/A	0.12	0.701	0.831	13.7855	13.595	14.0589	13.5165	11.4038	11.2164
TGME49_219690	hypothetical protein	N/A	-0.55	0.209	0.382	17.8577	17.8733	17.7818	16.6405	16.3149	16.6489
TGME49_219700	DNA replication licensing factor MCM4, putative	N/A	-0.93	0.0209	0.0807	9.09347	8.67724	8.19459	7.70014	8.99007	9.36929
TGME49_219710	hypothetical protein	N/A	0	0.994	1	9.99055	10.754	9.56059	10.9541	10.3284	9.84552
TGME49_219720	ras-related protein RAB5C	RAB5C	0.57	0.0303	0.104	15.5642	15.3335	15.988	16.0596	11.2377	10.9175
TGME49_219730	hypothetical protein	N/A	0.48	0.337	0.525	10.2594	11.3593	10.8531	11.7843	14.5404	14.8837
TGME49_219738	armadillo repeat-containing protein	N/A	-0.54	0.0909	0.22	9.04751	8.92423	8.34739	8.54381	8.24244	8.16803
TGME49_219742	hypothetical protein	N/A	-0.36	0.693	0.826	5.40581	6.54744	6.1639	5.11647	3.34515	4.4925
TGME49_219750	cytochrome c, putative	N/A	0.5	0.23	0.408	9.78882	10.3692	10.1664	10.946	13.384	13.8241
TGME49_219760	N-acetyltransferase family protein	N/A	-0.26	0.524	0.698	9.61064	9.16064	9.45421	8.75139	10.282	10.6068
TGME49_219770	30S ribosomal protein S12, putative	N/A	-1.42	0.099	0.232	5.67127	4.09534	4.53962	1.3809	10.9402	11.1744
TGME49_219790	pre-mRNA processing factor PRP3	N/A	-0.74	0.026	0.0937	7.26428	7.19814	6.38342	6.71809	11.227	11.2911
TGME49_219800	vacuolar ATP synthase subunit b, putative	N/A	0.17	0.607	0.76	6.93463	6.99699	6.8928	7.34904	12.1296	12.1008
TGME49_219810	dense granule protein GRA40	GRA40	-0.08	0.903	0.952	5.01805	3.32946	4.45603	4.09112	12.2239	11.4534
TGME49_219820	polyubiquitin UbC, putative	N/A	1.18	0.00358	0.0223	15.5291	15.4028	16.1554	17.0175	15.6474	16.2326
TGME49_219828	HMG (high mobility group) box domain-containing protein	N/A	2.43	5.4e-08	6.35e-06	10.6449	9.90772	12.1992	13.1464	10.3152	10.3723
TGME49_219850	prolyl-tRNA synthetase (ProRS)	N/A	-0.67	0.17	0.335	6.17733	6.13753	5.90489	4.90099	9.75367	9.89769
TGME49_219860	DNA replication licensing factor MCM6, putative	MCM6	-0.74	0.078	0.197	8.14785	7.57057	7.37475	6.86431	9.5226	9.4864
TGME49_220025	hypothetical protein	N/A	0.82	0.00291	0.019	16.2092	16.1334	16.8015	17.1651	10.0474	9.76933
TGME49_220070	hypothetical protein	N/A	-2.83	0.124	0.27	2.40114	0	0	0	8.24002	8.22359
TGME49_220080	Toxoplasma gondii family C protein	N/A	-1.67	0.106	0.243	3.93301	2.59194	1.20743	2.53927	8.49739	8.40619
TGME49_220090	DIX domain-containing protein	N/A	0.27	0.339	0.528	13.7086	13.963	14.0705	14.1439	11.9073	12.2804
TGME49_220100	phosphoribosylpyrophosphate synthetase	N/A	-0.99	0.0771	0.196	5.01805	4.9623	3.14658	4.64758	11.0575	11.3025
TGME49_220110	hypothetical protein	N/A	0.3	0.414	0.6	12.7234	12.1434	12.6298	12.8778	10.2731	9.73606
TGME49_220120	AP-5 complex subunit sigma, putative	N/A	-1.96	1.45e-05	0.000335	6.14859	6.68071	4.69354	4.33997	10.997	10.9614
TGME49_220132	hypothetical protein	N/A	0.04	0.937	0.971	8.33804	7.33924	7.56631	8.27906	6.95631	6.91146
TGME49_220140	EF hand domain-containing protein	N/A	-0.56	0.154	0.313	8.89148	9.57251	8.86758	8.52508	9.03975	9.07491
TGME49_220145	hypothetical protein	N/A	-0.84	0.852	NA	3.0245	0	2.30094	0	1.33745	0
TGME49_220150	50S ribosomal protein L16, putative	N/A	-0.26	0.403	0.59	13.8455	13.9471	13.9022	13.3174	10.6154	10.7971
TGME49_220160	ATG18/WIPI-like protein PROP2	PROP2	-1.16	0.0129	0.0576	7.13838	6.87866	6.1639	5.52107	9.21803	8.87627
TGME49_220170	coiled-coil domain-containing protein	N/A	-0.65	0.12	0.264	5.74991	6.17818	5.07603	5.57062	12.2764	12.6174
TGME49_220175	hypothetical protein	N/A	-0.3	0.573	0.736	4.18022	5.05251	4.17156	4.64758	10.576	10.3857
TGME49_220180	hypothetical protein	N/A	-1.35	0.048	0.142	6.02754	5.29356	3.81687	4.82137	7.87116	7.784
TGME49_220190	hypothetical protein	N/A	-1.55	0.0548	0.155	6.43703	5.43444	3.67619	5.04816	7.78389	7.05839
TGME49_220200	hypothetical protein	N/A	-2.31	0.000978	0.00826	7.59768	7.42617	5.99649	3.40951	10.8006	11.1874
TGME49_220208	hypothetical protein	N/A	-1.62	0.00129	0.0102	8.36951	7.79624	6.5739	6.42674	7.08087	6.6353
TGME49_220212	pseudouridine synthase	N/A	3.47	0.0542	0.154	1.27942	0	3.81687	0	8.08908	7.91834
TGME49_220230	leucine rich repeat-containing protein	N/A	-1.29	0.000355	0.00375	8.89148	8.82534	7.44147	7.70014	11.0956	10.5307
TGME49_220240	dense granule protein GRA31	GRA31	5.18	0.123	0.269	0	0	0	4.09112	9.91754	9.88379
TGME49_220250	Nucleotide-sensitive chloride conductance regulator (ICln) protein	N/A	-0.13	0.773	0.877	9.15978	8.40923	9.04969	8.22594	11.1567	11.1078
TGME49_220260	hypothetical protein	N/A	0.37	0.633	0.782	4.18022	4.70849	5.13096	4.44996	6.34739	6.57147
TGME49_220270	alveolin domain containing intermediate filament IMC6	IMC6	3.05	0.000175	0.00216	6.5291	4.17783	7.83801	9.37064	9.53552	9.59672
TGME49_220280	mucin family glycoprotein	N/A	2.8	0.000205	0.00247	8.70174	6.05264	10.1382	11.1172	12.3039	12.2707
TGME49_220290	hypothetical protein	N/A	0.12	0.903	0.952	5.74991	3.9147	4.83261	5.52107	4.93182	5.38781
TGME49_220300	ribosomal protein L15 protein	N/A	-0.33	0.847	0.921	4.57522	3.70817	4.83261	0	10.1919	10.0005
TGME49_220310	hypothetical protein	N/A	-0.64	0.482	0.662	3.93301	4.9623	3.94503	3.94849	5.89571	6.53847
TGME49_220320	BSD domain-containing protein	N/A	-1.72	0.000374	0.00391	6.96791	6.76318	5.62768	4.44996	10.321	10.3869
TGME49_220330	hypothetical protein	N/A	3.3	0.00594	0.0328	1.94666	0	4.17156	2.89088	10.3106	9.71221
TGME49_220340	transporter, putative	N/A	4.02	0.0495	0.145	1.27942	0	4.27274	1.3809	5.7935	5.31172
TGME49_220350	tRNA ligases class II (D, K and N) domain-containing protein	N/A	2.46	0.0446	0.135	0	1.59055	3.34551	2.07335	11.2975	10.7484
TGME49_220360	FAD binding domain-containing protein	N/A	-0.29	0.37	0.559	14.3179	14.3159	13.7555	14.2626	10.7136	10.3021
TGME49_220370	hypothetical protein	N/A	1.13	0.00278	0.0185	5.89539	6.31205	7.01466	7.45836	10.9293	10.8498
TGME49_220380	hypothetical protein	N/A	0.65	0.0165	0.0682	11.6093	11.2148	12.0221	12.1216	13.3248	13.302
TGME49_220390	hypothetical protein	N/A	1.07	0.000151	0.00192	12.3458	12.2257	13.1126	13.5657	12.9375	12.978
TGME49_220400	actin depolymerizing factor ADF	ADF	0.26	0.562	0.727	14.0763	15.0688	14.5348	15.2204	17.238	17.6057
TGME49_220420	3'5'-cyclic nucleotide phosphodiesterase PDE5	PDE5	1.9	1.17e-05	0.000287	10.1871	9.46984	11.3	12.1314	9.99514	9.8294
TGME49_220430	hypothetical protein	N/A	-0.54	0.116	0.259	12.1768	11.9691	11.6401	11.4172	10.3415	9.66712
TGME49_220440	cyclin-dependent kinase regulatory subunit protein	N/A	0.81	0.00613	0.0336	10.0827	9.88641	10.675	10.9103	5.89571	5.67273
TGME49_220450	ribonuclease HI protein	N/A	3.27	0.161	0.323	0	0	1.8554	1.3809	4.57928	5.14633
TGME49_220460	SNF7 family protein	N/A	1.05	0.000408	0.00417	16.2811	15.9734	17.0901	17.2721	12.7849	13.2053
TGME49_220470	hypothetical protein	N/A	0.08	0.86	0.929	9.95986	10.6166	9.77626	10.8464	12.0457	11.9258
TGME49_220480	hypothetical protein	N/A	-0.19	0.706	0.834	11.1588	11.0805	10.4369	11.3	8.47692	7.35227
TGME49_220490	pre-rRNA-processing protein PNO1, putative	N/A	1.05	0.0405	0.127	4.0619	4.53157	4.83261	5.75334	11.191	11.4479
TGME49_220500	UBX domain-containing protein	N/A	-0.03	0.922	0.963	14.6472	14.7832	14.8693	14.487	13.3755	13.5258
TGME49_220510	hypothetical protein	N/A	0.44	0.129	0.278	8.67176	8.87563	9.16276	9.28047	12.9138	13.2848
TGME49_220520	hypothetical protein	N/A	0.24	0.678	0.816	9.3485	10.1543	9.20498	10.5792	11.2407	10.4386
TGME49_220525	hypothetical protein	N/A	0.16	0.853	0.924	5.3564	6.51607	5.13096	6.82403	7.53344	6.81829
TGME49_220530	AP2 domain transcription factor AP2V-1	AP2V1	0.4	0.503	0.681	8.23928	9.27514	8.26382	9.8434	11.5982	11.338
TGME49_220540	hypothetical protein	N/A	0.56	0.176	0.342	12.5308	11.6327	12.7882	12.6287	11.6322	11.0876
TGME49_220560	transmembrane protein TauE, putative	N/A	0.37	0.489	0.668	9.1883	9.98421	9.42152	10.4177	8.17798	8.99961
TGME49_220570	zinc finger protein, putative	N/A	-0.54	0.027	0.0964	11.5933	11.5475	11.1434	10.9079	11.9589	11.9353
TGME49_220585	hypothetical protein	N/A	1.68	0.655	NA	0	0	1.20743	0	3.66759	2.99833
TGME49_220600	apicomplexan amino acid transporter ApiAT3-3	ApiAT3-3	0.02	0.939	0.973	12.4675	12.6175	12.429	12.6892	11.8378	11.7211
TGME49_220610	protein phosphatase PPM9	PPM9	0.83	0.567	0.731	2.74623	3.70817	0	5.04816	7.16515	7.79102
TGME49_220630	hypothetical protein	N/A	3.49	0.0241	0.0895	5.78768	1.59055	6.99998	8.97484	12.9239	12.901
TGME49_220640	hypothetical protein	N/A	2.86	9.65e-09	1.85e-06	4.73841	4.53157	6.81105	7.89747	11.9993	11.8496
TGME49_220650	hypothetical protein	N/A	4.23	5.56e-06	0.000162	5.54464	2.81453	7.82141	9.51681	7.24961	7.27423
TGME49_220720	hypothetical protein	N/A	-1.53	0.234	0.412	4.65912	5.13742	1.20743	4.33997	5.57983	5.2519
TGME49_220740	hypothetical protein	N/A	0.48	0.789	0.888	3.0245	1.00419	0	3.61237	6.34739	5.59461
TGME49_220840	threonine synthase	N/A	0.36	0.149	0.307	14.9541	15.1718	15.3139	15.5262	9.9236	9.8472
TGME49_220850	hypothetical protein	N/A	4.07	0.374	NA	0	0	1.8554	2.53927	2.19002	0
TGME49_220860	DEAD/DEAH box helicase	N/A	0.53	0.0965	0.228	12.3596	12.567	12.6631	13.276	12.1104	12.1284
TGME49_220870	hypothetical protein	N/A	0.11	0.747	0.861	9.22317	9.60641	9.73252	9.30629	11.5098	11.725
TGME49_220880	dynactin subunit 3, putative	N/A	0.77	0.00145	0.0111	14.2233	14.283	14.949	15.0995	11.8078	12.0435
TGME49_220890	dense granule protein GRA12A	GRA12A	0.23	0.74	0.857	6.14859	7.3212	5.70214	7.77601	13.4083	13.5457
TGME49_220900	apical cap protein AC13	AC13	3.03	0.000129	0.00169	8.60985	6.07434	9.98637	11.4087	11.3935	10.8598
TGME49_220910	HEAT repeat-containing protein	N/A	-1.42	1.19e-05	0.000292	10.8214	10.6368	9.3909	9.2351	11.7134	11.1814
TGME49_220920	hypothetical protein	N/A	-0.65	0.12	0.264	11.7269	11.2949	10.7127	11.0214	8.82663	7.91513
TGME49_220930	IMC sutures component ISC3	ISC3	0.4	0.156	0.315	12.5291	12.4609	12.8527	12.9454	8.0285	7.55151
TGME49_220940	ribosomal RNA methyltransferase (FtsJ) family protein	N/A	0.29	0.418	0.604	8.01085	8.19817	8.30621	8.48688	8.9944	9.39141
TGME49_220950	hypothetical protein	N/A	0.58	0.197	0.369	7.76796	7.7498	8.79289	7.6777	11.0443	10.9633
TGME49_221160	acetyltransferase, GNAT family protein	N/A	-0.51	0.0511	0.148	12.0921	12.0758	11.7173	11.4231	12.1394	12.3158
TGME49_221170	CAAX metallo endopeptidase	N/A	-0.36	0.316	0.504	11.7227	11.902	11.7906	11.008	7.98278	8.01148
TGME49_221180	hypothetical protein	N/A	1.11	0.00264	0.0177	8.15509	7.65938	8.65443	9.33882	15.97	15.832
TGME49_221190	mrna cleavage factor family protein, putative	N/A	-0.73	0.0429	0.132	6.8479	6.6082	6.19001	5.79563	11.3833	11.326
TGME49_221200	CW-type Zinc Finger protein	N/A	-1.29	0.00145	0.0111	8.96337	9.11949	7.54624	7.95457	8.6349	8.09613
TGME49_221210	cyclophilin	N/A	-0.47	0.119	0.262	12.0011	12.4127	11.8885	11.5923	9.36448	9.56225
TGME49_221220	hypothetical protein	N/A	-0.92	0.268	0.451	6.41307	6.21771	5.90489	4.64758	6.08068	7.5963
TGME49_221230	protein tyrosine phosphatase, putative	N/A	0.36	0.0954	0.227	13.7081	13.6863	14.0318	14.085	11.1736	11.248
TGME49_221250	hypothetical protein	N/A	2.31	0.000309	0.00335	7.68032	6.46771	8.86758	9.94081	8.74169	7.81533
TGME49_221260	Class-II DAHP synthetase family protein	N/A	-0.45	0.172	0.338	9.60536	9.96401	9.47824	9.20404	8.96971	8.76297
TGME49_221265	hypothetical protein	N/A	0.52	0.509	0.686	8.45415	10.0541	8.732	10.6268	4.48405	5.62637
TGME49_221270	oxidoreductase, 2OG-Fe(II) oxygenase family protein	N/A	0.65	0.0368	0.119	12.3681	12.6677	13.0285	13.313	9.75877	10.1917
TGME49_221275	hypothetical protein	N/A	0.16	0.904	0.953	2.74623	3.70817	3.52031	3.40951	3.27102	3.68151
TGME49_221280	hypothetical protein	N/A	-0.27	0.447	0.631	14.8385	14.4375	14.1663	14.5633	9.21433	8.58854
TGME49_221295	hypothetical protein	N/A	-0.44	0.273	0.457	6.17733	5.68063	5.66539	5.30391	12.8763	13.2174
TGME49_221310	aminopeptidase N1	APN1	0.18	0.448	0.631	14.4348	14.6925	14.8101	14.6937	13.3079	13.2415
TGME49_221320	acetyl-CoA carboxylase ACC1	ACC1	-0.43	0.178	0.344	8.25958	8.4388	8.0736	7.76542	10.3255	10.4291
TGME49_221330	DNA gyrase subunit A	GYRA	0.87	0.0292	0.102	7.09385	6.82848	7.9644	7.6777	8.61817	8.90891
TGME49_221340	CRAL-TRIO domain-containing protein	N/A	0.21	0.686	0.821	7.36765	7.39203	7.54624	7.63176	5.38271	4.55983
TGME49_221350	Ctr copper transporter family protein	N/A	-0.6	0.116	0.259	11.0396	11.1581	10.8541	10.0409	10.1944	10.4586
TGME49_221360	autophagy-related protein ATG6, putative	N/A	0.29	0.177	0.343	14.4516	14.3748	14.7319	14.6832	12.6859	12.5983
TGME49_221370	hypothetical protein	N/A	0.55	0.276	0.46	8.5341	9.05275	8.62603	9.86837	10.0898	10.1203
TGME49_221380	alba 1	N/A	-0.82	0.00499	0.0286	10.6678	10.5668	9.96195	9.60862	13.5854	13.9243
TGME49_221390	hypothetical protein	N/A	0.62	0.0979	0.231	10.4123	10.7001	10.7216	11.5373	13.1388	13.3203
TGME49_221400	hypothetical protein	N/A	0.05	0.882	0.942	8.1837	8.26573	8.45895	8.07103	9.85389	10.2381
TGME49_221410	actin-like protein ALP4	ALP4	-0.44	0.118	0.262	10.0674	10.0224	9.75018	9.43892	9.91374	9.84888
TGME49_221415	hypothetical protein	N/A	1.37	0.466	0.649	1.94666	4.17783	1.20743	5.61851	1.82582	2.99833
TGME49_221420	Chromosome-associated kinesin KLP1, putative	N/A	1.03	0.036	0.117	7.03225	7.50018	7.94153	8.60453	5.89571	6.08068
TGME49_221430	hypothetical protein	N/A	-0.58	0.395	0.583	7.74894	7.78969	7.81303	6.06127	6.5801	6.71869
TGME49_221440	RPGR, putative	N/A	-1.43	0.00394	0.0239	10.8728	10.4156	9.68283	8.58055	7.45609	6.88545
TGME49_221450	SPRY domain-containing protein	N/A	-1.12	0.0154	0.0652	7.56543	7.22748	6.65111	5.79563	9.47799	9.37163
TGME49_221460	phosphoglycerate mutase family protein	N/A	-0.76	0.241	0.421	5.96298	6.23708	4.76475	5.79563	7.06451	7.15953
TGME49_221470	hypothetical protein	N/A	0.53	0.0193	0.0766	13.4677	13.4753	13.9348	14.0602	15.025	15.1564
TGME49_221480	hypothetical protein	N/A	-0.16	0.594	0.751	10.251	10.6286	10.4424	10.1283	14.4887	14.7182
TGME49_221490	cell cycle regulator protein	N/A	0.55	0.0237	0.0883	13.4746	13.5356	14.1429	13.9592	9.96827	10.1656
TGME49_221500	dual specificity phosphatase, catalytic domain-containing protein	N/A	0.02	0.928	0.966	15.7574	15.6284	15.5504	15.8678	11.3144	11.3682
TGME49_221510	cytochrome c oxidase subunit ApiCOX18	ApiCOX18	0.42	0.156	0.315	13.4127	13.7223	13.9704	14.0236	11.5608	12.0036
TGME49_221530	hypothetical protein	N/A	-0.42	0.591	0.749	4.48614	6.25619	5.37806	5.04816	7.46026	8.11305
TGME49_221540	DUSP domain-containing protein	N/A	-0.52	0.0947	0.226	11.405	11.367	11.125	10.544	11.6416	11.5936
TGME49_221550	CMGC kinase, MAPK family, MEK kinase-related (incomplete catalytic triad)	N/A	0.83	0.000821	0.00718	16.2719	16.0604	16.9012	17.0962	13.7297	13.8802
TGME49_221560	hypothetical protein	N/A	3.05	2.4e-06	8.8e-05	5.89539	5.50004	7.7265	9.32806	7.58789	7.63194
TGME49_221570	pre-rRNA-processing protein, putative	N/A	-1.16	0.00812	0.0411	10.8914	11.3398	10.3771	9.42552	9.46454	9.82085
TGME49_221580	ribosomal RNA large subunit methyltransferase J protein	N/A	0.17	0.645	0.791	11.787	11.1883	11.7089	11.6611	11.9345	11.3901
TGME49_221585	hypothetical protein	N/A	0.04	0.959	0.983	4.3912	5.46761	4.89742	5.24409	7.08087	7.65906
TGME49_221590	dual specificity phosphatase, catalytic domain-containing protein	N/A	0.09	0.793	0.89	10.6487	11.2781	10.9101	11.2438	13.0739	13.256
TGME49_221600	ribosomal silencing factor RsfS, putative	N/A	-0.83	0.0719	0.187	8.09611	8.2031	7.6249	6.94167	9.4562	10.1851
TGME49_221610	ubiquitin carboxyl-terminal hydrolase	N/A	-1.37	0.0105	0.0495	11.4231	10.9115	10.4024	8.84497	11.8752	11.8968
TGME49_221620	beta-tubulin, putative	N/A	0.14	0.554	0.722	14.8536	15.0624	15.0846	15.1124	12.4107	12.3565
TGME49_221630	IMC-associated protein IAP4	IAP4	-0.46	0.201	0.374	8.1623	8.79299	7.95681	8.14649	12.0848	11.7739
TGME49_221640	hypothetical protein	N/A	0.35	0.247	0.428	15.5202	15.4597	15.6188	16.028	11.0377	10.646
TGME49_221660	DEAD/DEAH box helicase domain-containing protein	N/A	-0.68	0.078	0.197	9.53771	9.09582	8.88766	8.37281	10.9134	10.463
TGME49_221665	hypothetical protein	N/A	0.64	0.00781	0.04	16.6268	16.5118	17.0963	17.3109	11.4518	11.3153
TGME49_221670	transcriptional elongation factor FACT140	FACT140	0.1	0.655	0.798	10.755	10.6914	10.9052	10.7421	14.1471	14.1699
TGME49_221675	hypothetical protein	N/A	-1.11	0.0656	0.176	6.57302	7.19814	5.50827	6.09552	6.42636	6.7113
TGME49_221685	hypothetical protein	N/A	-2.09	0.0139	0.0605	3.79146	4.17783	2.64086	1.3809	9.28549	9.62843
TGME49_221690	hypothetical protein	N/A	-0.74	0.00412	0.0248	11.5739	11.3488	10.757	10.7038	7.82008	7.74836
TGME49_221700	golgi apparatus membrane protein TVP23, putative	N/A	-0.35	0.287	0.471	13.5378	13.5108	13.4667	12.8111	11.7759	11.9765
TGME49_221710	TBC domain-containing protein TBC13	TBC13	-0.23	0.39	0.578	13.9418	13.5963	13.4923	13.6069	11.4402	11.2736
TGME49_221720	hypothetical protein	N/A	-1.51	0.000609	0.00569	9.90936	9.55718	8.02366	8.441	8.8379	8.02941
TGME49_221818	hypothetical protein	N/A	1.65	0.358	0.547	1.27942	2.00628	0	3.94849	10.4186	11.0751
TGME49_221830	subtilisin SUB12	SUB12	0.1	0.788	0.888	11.4042	10.8085	11.3865	11.0739	8.24729	7.74475
TGME49_221840	hypothetical protein	N/A	1.3	0.0305	0.105	7.93715	9.05275	9.11246	10.4092	5.46814	5.36916
TGME49_221850	prohibitin family protein, putative	N/A	-0.96	0.064	0.173	9.22317	9.88488	9.12605	7.88773	10.0831	10.3793
TGME49_221855	hypothetical protein	N/A	-0.46	0.823	0.907	3.93301	2.32863	3.81687	0	3.60862	2.89782
TGME49_221860	hypothetical protein	N/A	3.91	0.187	NA	0	0	2.91577	0	4.06863	4.55983
TGME49_221865	hypothetical protein	N/A	-4.8	0.021	0.081	2.74623	3.32946	0	0	5.0694	4.74481
TGME49_221870	hypothetical protein	N/A	-0.72	0.022	0.0835	10.0206	9.62307	9.17261	9.06403	11.9565	11.6133
TGME49_221900	hypothetical protein	N/A	-4.39	0.0612	0.168	3.63451	0	0	0	6.5333	5.98594
TGME49_221910	AN1 family Zinc finger domain-containing protein	N/A	0.42	0.0723	0.188	17.9045	17.6625	18.1814	18.2381	14.933	14.9685
TGME49_221922	NifU family domain-containing protein	N/A	0.74	0.676	0.815	0	2.00628	2.64086	0	6.14436	6.45249
TGME49_221930	hypothetical protein	N/A	3.03	7.1e-06	0.000198	6.08933	4.46742	8.08059	8.78851	7.26402	7.6003
TGME49_221940	AP-2 complex subunit alpha	AP-2alpha	-0.04	0.906	0.953	11.4491	11.1877	11.2481	11.3264	11.9493	11.4356
TGME49_221950	splicing factor 3A subunit 3, putative	SF3A3	-1.05	0.0168	0.069	12.122	11.9985	11.48	10.3305	13.068	13.3308
TGME49_221970	DUF2423 domain-containing protein	N/A	-0.88	0.028	0.0993	9.78882	9.41775	9.09184	8.26408	11.3054	11.5766
TGME49_221980	U1 zinc finger protein	N/A	-0.04	0.904	0.953	10.1782	9.91525	10.1382	9.8807	10.1039	10.4274
TGME49_221990	hypothetical protein	N/A	3.22	4.28e-05	0.000762	7.12369	5.2176	8.44817	10.3143	9.50654	9.12301
TGME49_222000	ribosome biogenesis protein BRX1, putative	N/A	-0.2	0.734	0.853	3.79146	4.9623	4.61863	3.94849	10.3778	10.5983
TGME49_222010	HAD hydrolase, family IIID protein	N/A	-1.06	0.00192	0.0139	9.05913	9.06905	8.26995	7.68896	10.6862	10.7645
TGME49_222020	phosphoglycerate kinase PGKII	PGKII	1.87	0.223	0.4	1.94666	2.59194	2.64086	4.64758	3.48289	5.18949
TGME49_222030	hypothetical protein	N/A	-0.41	0.162	0.324	13.1899	13.0401	12.8189	12.5921	9.67591	9.23797
TGME49_222040	Ran-interacting Mog1 protein	N/A	-0.06	0.844	0.919	11.5258	12.0548	11.8086	11.6901	12.1255	12.5222
TGME49_222050	hypothetical protein	N/A	0.82	0.0339	0.112	12.5249	12.7331	12.9919	13.8086	8.91143	8.46665
TGME49_222060	transporter, cation channel family protein	N/A	-0.07	0.865	0.932	8.26628	8.40066	8.36468	8.15463	5.56439	6.16959
TGME49_222070	elongation factor Tu GTP binding domain-containing protein	N/A	-0.76	0.0843	0.209	11.0229	10.7938	10.6028	9.50412	10.5311	10.6965
TGME49_222075	hypothetical protein	N/A	-4.38	0.308	NA	0	3.59264	0	0	2.01938	0.620822
TGME49_222090	hypothetical protein	N/A	0.4	0.0877	0.214	13.6704	13.8879	14.2009	14.1571	11.2567	11.2394
TGME49_222100	effector protein SOS1	SOS1	0.23	0.737	0.854	5.82448	6.03061	6.61302	5.46977	7.22528	6.74062
TGME49_222110	PUB domain-containing protein	N/A	0.33	0.222	0.399	13.5079	13.5963	13.8763	13.8817	12.9966	13.3922
TGME49_222120	pseudouridine synthase, putative	N/A	0.15	0.692	0.826	9.35166	9.25153	8.98406	9.79992	10.9628	10.8015
TGME49_222130	hypothetical protein	N/A	0.8	0.00288	0.0189	14.7353	14.7046	15.3593	15.6642	12.4505	12.7293
TGME49_222140	DEAD/DEAH box helicase domain-containing protein	N/A	0.25	0.636	0.783	7.31689	7.75652	7.05783	8.30124	9.33522	9.35396
TGME49_222155	hypothetical protein	N/A	-1.17	0.635	0.783	0	2.00628	1.20743	0	5.09111	4.45761
TGME49_222160	aldehyde dehydrogenase	N/A	-0.84	0.0749	0.193	17.9064	17.7317	17.4842	16.1936	12.6557	12.1885
TGME49_222170	dense granule protein GRA17	GRA17	0.33	0.39	0.578	11.438	10.6395	11.6168	11.2081	8.95499	9.02068
TGME49_222180	hypothetical protein	N/A	0.43	0.529	0.702	5.96298	7.88485	6.99998	8.10506	10.3341	10.5898
TGME49_222188	microneme protein MIC21L1	MIC21L1	0.33	0.352	0.541	9.45503	9.90772	10.1281	9.91467	4.48405	4.22849
TGME49_222192	protein HGH1, putative	N/A	0.7	0.0207	0.0803	12.4758	12.22	12.9257	13.1772	10.346	9.91064
TGME49_222200	apical annuli protein LMBD3	LMBD3	-0.65	0.0752	0.193	8.51734	8.35707	8.00907	7.52271	9.08102	9.14099
TGME49_222210	SPFH domain / Band 7 family protein	N/A	-0.6	0.39	0.578	4.88499	4.40029	4.61863	3.40951	8.18051	8.50772
TGME49_222220	alveolin domain containing intermediate filament IMC7	IMC7	-0.92	0.0243	0.09	7.97856	8.14277	7.20591	7.06779	6.32924	6.44361
TGME49_222230	MMS19 nucleotide excision repair protein, putative	N/A	-0.9	0.0156	0.0653	12.4664	12.0034	11.368	11.3434	10.5166	9.79925
TGME49_222240	hypothetical protein	N/A	0.45	0.0988	0.232	11.0219	10.7566	11.2705	11.4231	12.4241	12.1611
TGME49_222250	hypothetical protein	N/A	0.18	0.545	0.714	13.4739	13.323	13.3035	13.8203	9.17167	9.04438
TGME49_222260	hypothetical protein	N/A	0.38	0.176	0.342	15.9157	15.9814	16.2195	16.4351	10.7541	10.3211
TGME49_222270	hypothetical protein	N/A	0.56	0.102	0.237	10.0046	9.78315	10.5126	10.3938	4.77972	4.14325
TGME49_222280	hypothetical protein	N/A	-0.47	0.232	0.41	8.19077	8.05273	7.99433	7.1996	11.5909	11.9402
TGME49_222290	U6 snRNA-associated Sm-like protein LSm1, putative	N/A	0.38	0.201	0.374	10.7586	10.8357	10.946	11.3742	11.1152	11.3338
TGME49_222300	hypothetical protein	N/A	-1.75	0.0298	0.103	6.26026	6.09571	4.17156	4.73709	3.34515	3.68151
TGME49_222305	hypothetical protein	N/A	-0.98	0.169	0.334	6.75563	6.21771	4.83261	6.02619	6.71902	7.45312
TGME49_222310	THH1 domain-containing protein	N/A	-0.06	0.848	0.921	10.4017	10.1708	10.441	9.96648	11.7101	11.3508
TGME49_222330	hypothetical protein	N/A	-1.21	0.0186	0.0746	8.76464	8.64497	7.09975	7.81765	5.51707	4.74481
TGME49_222340	NOL1/NOP2/sun family protein	N/A	-0.74	0.0657	0.176	9.97426	9.69486	9.48353	8.58055	11.3858	11.2849
TGME49_222350	hypothetical protein	N/A	0.11	0.764	0.87	9.27395	9.13248	8.97283	9.59671	9.0564	8.81385
TGME49_222360	E3 UFM1-protein ligase 1	UFL1	-0.88	0.0122	0.055	10.9	10.6675	10.1989	9.55424	9.72185	9.60571
TGME49_222370	SAG-related sequence SRS13	SRS13	4.22	0.0212	0.0814	0	0	3.14658	0	7.82008	8.05589
TGME49_222380	importin-beta N-terminal domain-containing protein	N/A	-0.2	0.57	0.734	8.39421	7.90315	8.05241	7.86805	11.9563	11.5165
TGME49_222385	hypothetical protein	N/A	-0.59	0.301	0.487	6.5291	6.80271	6.33744	5.79563	6.64023	7.06998
TGME49_222390	hypothetical protein	N/A	0.43	0.292	0.477	11.951	12.197	12.4124	12.5969	7.11835	8.10743
TGME49_222400	hypothetical protein	N/A	-0.62	0.00864	0.0431	13.0423	13.2008	12.5552	12.452	7.33851	7.27923
TGME49_222410	lipase maturation factor, putative	N/A	-0.42	0.595	0.752	5.3564	6.25619	5.28424	5.75334	5.61021	6.47883
TGME49_222420	hypothetical protein	N/A	0.57	0.483	0.663	8.76464	10.3426	9.12266	10.9796	7.7261	9.37748
TGME49_222430	HECT-domain (ubiquitin-transferase) domain-containing protein	N/A	6.15	7.93e-05	0.00119	0	0	2.91577	4.73709	13.199	12.7755
TGME49_222660	non-discharge partner NDP1	NDP1	-0.81	0.0332	0.111	12.5189	12.2743	11.8086	11.3461	10.2395	9.51319
TGME49_222700	hypothetical protein	N/A	0.57	0.302	0.488	6.8117	7.18822	7.12703	7.9263	6.40918	6.87887
TGME49_222710	IMP-specific 5'-nucleotidase 1, putative	N/A	-0.9	0.0383	0.122	12.7663	12.5265	12.2132	11.0867	13.259	13.4228
TGME49_222800	glycogen synthase, putative	N/A	-0.99	9.02e-05	0.0013	12.3716	12.1263	11.2238	11.3101	10.8756	10.7614
TGME49_222840	Ser/Thr phosphatase family protein	N/A	0.75	0.0226	0.0852	6.88322	7.3212	7.69037	8.03619	12.6037	12.6816
TGME49_222850	stress responsive a/b barrel domain-containing protein	N/A	0.23	0.493	0.672	8.09611	8.69835	8.59705	8.71881	14.1135	14.3519
TGME49_222860	eukaryotic translation initiation factor 3 subunit B, putative	N/A	-0.59	0.0903	0.219	13.0784	12.8897	12.6899	12.0332	13.1082	13.4802
TGME49_222870	proteasome assembly chaperone 3, putative	N/A	0.68	0.0935	0.224	7.25082	7.82211	8.34739	8.13829	10.1749	10.7155
TGME49_222880	hypothetical protein	N/A	-0.63	0.417	0.603	5.92958	6.13753	5.84042	4.82137	6.50931	5.59461
TGME49_222900	phosphoserine phosphatase	N/A	-0.29	0.313	0.5	11.9072	11.7401	11.7385	11.3018	13.2711	13.1324
TGME49_222910	phosphoglycerate mutase PGM3	PGM3	-0.02	0.962	0.985	6.4838	6.76318	6.99998	6.06127	9.99658	10.1035
TGME49_222920	trafficking protein particle complex subunit 2, putative	N/A	-1.2	0.0177	0.0719	14.0949	14.473	13.6454	12.2034	12.9319	13.2733
TGME49_222930	hypothetical protein	N/A	0.54	0.0452	0.136	12.6659	12.6953	13.2813	13.1777	10.129	10.5259
TGME49_222935	hypothetical protein	N/A	0.59	0.0309	0.106	15.4592	15.2258	15.9643	15.921	9.14727	8.74861
TGME49_222940	hypothetical protein	N/A	3.2	3.36e-06	0.000113	11.2613	9.37905	12.8432	14.372	11.1428	11.2661
TGME49_222948	hypothetical protein	N/A	0.37	0.286	0.471	8.28621	7.72258	8.23276	8.53759	12.0223	12.2033
TGME49_222952	phosphohistidine phosphatase	N/A	0.43	0.227	0.405	8.51734	7.97988	8.91921	8.441	12.9437	13.1855
TGME49_222960	SCY kinase-related protein (incomplete catalytic triad)	N/A	-0.44	0.191	0.363	10.0808	9.77489	9.67823	9.29528	11.3907	10.9761
TGME49_222970	inositol(myo)-1(or 4)-monophosphatase 2, putative	N/A	0.11	0.746	0.86	11.3237	11.7286	11.3716	11.8881	13.6753	14.0589
TGME49_222990	ribosomal protein S18, putative	N/A	0.63	0.0104	0.0493	12.8165	12.6208	13.2623	13.4451	12.1106	12.2394
TGME49_223000	dynein light chain DLC8a	DLC8a	-0.69	0.19	0.36	5.5881	6.93904	5.70214	5.79563	10.9535	11.0361
TGME49_223020	coproporphyrinogen III oxidase	N/A	0.88	0.0774	0.197	5.45359	4.81543	5.90489	6.12898	8.91143	9.1883
TGME49_223030	tetratricopeptide repeat-containing protein	N/A	0.46	0.614	0.767	5.25219	4.09534	5.13096	5.30391	4.60968	4.62416
TGME49_223040	hypothetical protein	N/A	-2.3	0.258	0.44	2.40114	2.00628	0	1.3809	4.57928	5.56214
TGME49_223050	ribosomal protein RPS20	RPS20	3.49	5.4e-06	0.000159	2.40114	1.59055	5.33191	4.82137	11.9932	12.3554
TGME49_223060	MORN repeat-containing protein	N/A	0.31	0.731	0.851	5.30524	3.9147	4.27274	5.57062	6.96221	6.65852
TGME49_223070	hypothetical protein	N/A	0.67	0.0946	0.226	13.5341	14.1676	14.1265	14.8801	14.0153	14.2424
TGME49_223080	hypothetical protein	N/A	-0.05	0.881	0.941	13.8038	13.884	13.4729	14.0618	13.3717	13.0971
TGME49_223095	hypothetical protein	N/A	0.52	0.109	0.246	10.6526	10.6468	10.851	11.4399	9.94313	9.80619
TGME49_223110	glycolipid transfer protein GLTP	GLTP	0.13	0.597	0.753	15.235	15.4207	15.524	15.386	10.9811	11.1116
TGME49_223120	cyclin-dependent kinase regulatory subunit protein	N/A	0.12	0.669	0.809	16.4846	16.7229	16.8365	16.6034	11.4095	11.1322
TGME49_223125	plastid ubiquitin-like protein PUBL	PUBL	-0.18	0.51	0.686	13.4833	13.7414	13.5713	13.2901	12.3047	12.5293
TGME49_223130	tRNA:m(4)X modification enzyme TRM13, putative	N/A	0.46	0.332	0.52	6.79325	6.21771	6.66978	7.24608	9.15502	8.91375
TGME49_223140	tRNA import protein tRIP, putative	N/A	-0.07	0.871	0.936	6.26026	5.78958	6.40587	5.52107	10.397	10.407
TGME49_223150	START domain-containing protein	N/A	0.61	0.0867	0.213	10.4273	10.4482	10.6576	11.3593	10.4111	10.6876
TGME49_223270	hypothetical protein	N/A	-0.64	0.0846	0.209	7.60827	7.58576	7.01466	6.90351	10.6377	10.1252
TGME49_223390	activating signal cointegrator 1 complex subunit 3 family 1 ASCC3L1, putative	N/A	-1.12	0.00496	0.0285	11.1651	10.8436	10.271	9.3949	13.5592	13.2385
TGME49_223400	hypothetical protein	N/A	1.29	0.000227	0.00265	14.8804	15.1718	15.9078	16.6428	9.26772	9.26218
TGME49_223410	eukaryotic initiation factor eIF4E1	EIF4E1	0.39	0.232	0.41	15.9873	16.3362	16.4341	16.673	13.8514	14.3721
TGME49_223420	DnaJ domain-containing protein	N/A	0.66	0.0143	0.0615	11.9458	12.0077	12.6351	12.6371	12.0993	12.4849
TGME49_223430	hypothetical protein	N/A	3.21	0.00077	0.00686	5.74991	2.32863	7.44147	8.43432	8.97847	8.77719
TGME49_223440	DEAD/DEAH box helicase domain-containing protein	N/A	0.17	0.597	0.753	13.3912	12.9153	13.1255	13.5274	10.6336	10.631
TGME49_223450	ubiquitin carboxyl-terminal hydrolase	N/A	-0.38	0.362	0.55	8.78346	8.22751	8.08059	8.22594	10.3267	9.71498
TGME49_223470	hypothetical protein	N/A	-0.42	0.511	0.688	5.30524	3.59264	4.17156	4.33997	8.91295	8.86466
TGME49_223480	sushi domain (scr repeat) domain-containing protein	N/A	-0.31	0.489	0.668	16.3262	16.0403	15.4485	16.2087	8.37443	7.38976
TGME49_223485	protein MPODD, putative	N/A	0.12	0.694	0.827	11.8096	12.2172	12.069	12.2296	12.1597	12.5475
TGME49_223490	hypothetical protein	N/A	0.26	0.401	0.589	8.6667	8.42197	8.80138	8.81444	10.5727	10.8814
TGME49_223500	hypothetical protein	N/A	-0.47	0.197	0.369	11.0239	10.3931	10.4383	10.0905	9.41699	9.20154
TGME49_223510	serine hydrolase ASH3	ASH3	0.65	0.00786	0.0402	13.8391	13.8582	14.3546	14.6302	11.8307	11.9321
TGME49_223520	EF hand domain-containing protein	N/A	1.6	1.56e-05	0.00035	15.6837	15.798	16.837	17.716	9.72966	9.80619
TGME49_223530	mitotic-spindle organizing protein 1, putative	N/A	1.16	0.0005	0.00489	13.2316	13.3461	14.1302	14.7138	11.5703	11.9597
TGME49_223540	importin-beta N-terminal domain-containing protein	N/A	-0.1	0.704	0.833	10.0732	10.021	9.82913	10.0518	10.1932	10.0533
TGME49_223550	hypothetical protein	N/A	-0.67	0.0712	0.186	8.35071	8.73967	7.91046	7.86805	7.90832	8.11584
TGME49_223560	hypothetical protein	N/A	1.38	0.201	0.373	3.93301	4.00785	4.06274	5.95335	5.27304	4.59235
TGME49_223570	zinc finger, C2H2 type domain-containing protein	N/A	0.48	0.327	0.516	8.38807	7.57818	8.88366	7.96387	10.8263	10.4821
TGME49_223580	mediator complex subunit MED4	MED4	0	0.993	1	11.966	11.9896	12.1238	11.8129	9.78731	9.5907
TGME49_223590	proteasome subunit beta type-6, putative	N/A	-0.35	0.244	0.424	10.8695	11.0231	10.8252	10.3287	11.847	11.9141
TGME49_223600	hypothetical protein	N/A	-0.56	0.12	0.263	10.7892	10.6531	10.4626	9.78163	10.6275	10.2855
TGME49_223610	hypothetical protein	N/A	-0.48	0.177	0.344	12.0712	11.7053	11.1943	11.6095	6.83934	6.27353
TGME49_223620	protein transport protein BOS1, putative	N/A	0.48	0.0397	0.125	12.2918	12.1873	12.6327	12.8101	10.9847	10.9918
TGME49_223630	E2F-associated phosphoprotein, putative	N/A	-0.74	0.0781	0.197	12.4787	12.7159	12.2369	11.3593	10.9639	11.5603
TGME49_223640	TBC domain-containing protein TBC12	TBC12	-1.03	0.00684	0.0365	10.2237	9.56295	8.89164	8.90896	9.89689	9.51107
TGME49_223660	50S ribosomal protein L4, putative	N/A	-0.56	0.12	0.263	13.0988	12.9586	12.8147	12.0227	12.1573	11.9732
TGME49_223668	LYAR-type C2HC zinc finger protein	N/A	0.54	0.196	0.369	7.55451	7.80923	7.70855	8.63396	11.4594	11.7441
TGME49_223672	3'(2'),5'-bisphosphate nucleotidase	N/A	0.59	0.0155	0.0653	10.6979	10.6495	11.2612	11.2581	9.40187	9.52798
TGME49_223680	ubiquitin domain-containing protein DSK2	DSK2	-0.89	0.0135	0.0593	11.2084	11.1396	10.5832	9.90021	12.0143	12.432
TGME49_223685	hypothetical protein	N/A	-0.38	0.348	0.538	10.1165	10.3856	10.2588	9.34595	11.5703	11.8775
TGME49_223690	hypothetical protein	N/A	-0.04	0.909	0.955	12.3505	12.5598	12.5234	12.318	12.3854	12.8809
TGME49_223700	F5/8 type C domain-containing protein	N/A	1.41	0.00012	0.0016	16.9441	16.6831	17.767	18.5873	10.5799	10.4018
TGME49_223710	tetratricopeptide repeat-containing protein	N/A	0.02	0.915	0.958	11.8746	11.9647	11.9778	11.9129	9.80137	9.85057
TGME49_223725	hypothetical protein	N/A	-0.59	0.268	0.451	6.23314	6.73621	5.66539	6.16168	7.99147	8.42662
TGME49_223750	hypothetical protein	N/A	0.99	0.0144	0.0619	8.26628	8.41774	8.76277	9.74703	13.6329	13.7689
TGME49_223760	hypothetical protein	N/A	0.11	0.789	0.888	9.78416	10.1908	9.58293	10.5063	12.1323	11.8074
TGME49_223770	hypothetical protein	N/A	1.43	0.00127	0.01	14.0951	14.6607	15.2446	16.2588	8.83308	8.39009
TGME49_223780	armadillo repeat-containing protein	N/A	0.08	0.82	0.905	9.97835	9.64136	9.62898	10.1427	10.2486	9.82428
TGME49_223790	hypothetical protein	N/A	2.38	0.00102	0.00854	6.95136	4.70849	7.81303	9.08975	11.8561	11.7614
TGME49_223800	hypothetical protein	N/A	-0.62	0.2	0.372	9.91577	9.61013	9.63374	8.42762	9.31576	9.24054
TGME49_223810	magnesium transporter, putative	N/A	0.45	0.216	0.391	13.9353	13.7932	14.1046	14.5102	11.0637	10.3064
TGME49_223830	fasciclin domain-containing protein	N/A	0.31	0.352	0.541	16.7251	16.6624	17.0797	16.9322	11.3855	10.6624
TGME49_223840	ATP-citrate lyase, putative	N/A	-0.77	0.0153	0.0648	9.28059	9.45544	8.31216	8.84999	12.4926	12.5892
TGME49_223845	hypothetical protein	N/A	0.14	0.614	0.767	14.5299	14.246	14.696	14.3553	10.9487	10.817
TGME49_223870	haloacid dehalogenase-like hydrolase, putative	HAD2D	-0.34	0.656	0.799	6.08933	4.9623	5.23493	5.30391	6.19535	5.78954
TGME49_223880	zinc finger, C3HC4 type (RING finger) domain-containing protein	N/A	-0.05	0.882	0.942	13.4189	13.0778	12.9521	13.4212	11.7884	11.1944
TGME49_223900	hypothetical protein	N/A	-0.24	0.554	0.721	15.6367	15.2685	15.4456	14.9656	10.3031	9.44136
TGME49_223910	acyltransferase domain-containing protein	N/A	-0.16	0.661	0.803	7.16732	6.9625	6.95502	6.84431	10.8463	11.3162
TGME49_223915	hypothetical protein	N/A	1.04	1.61e-06	6.95e-05	14.2288	14.2792	15.2676	15.3189	8.43298	8.36912
TGME49_223920	rhoptry neck protein RON3	RON3	2.3	8.59e-06	0.000228	5.99562	5.2176	7.44147	8.29389	10.8287	10.2629
TGME49_223930	RNA recognition motif-containing protein	N/A	-0.52	0.193	0.365	14.4189	14.4422	14.3319	13.3089	12.6288	12.7523
TGME49_223940	gliding-associated protein GAP45	GAP45	0.51	0.0532	0.152	11.805	12.1701	12.5027	12.5222	13.5054	13.6483
TGME49_223950	hypothetical protein	N/A	-1.04	0.00716	0.0379	7.91172	8.04726	6.65111	7.1996	10.2558	9.92028
TGME49_223960	ubiquitin interaction motif family protein	N/A	-0.15	0.56	0.725	12.0466	11.7995	11.8969	11.6439	11.1369	11.1511
TGME49_223970	translation elongation and release factors (gtpases), putative	N/A	0.35	0.35	0.54	6.46061	6.51607	6.90861	6.73991	9.52759	9.36694
TGME49_223985	protein phosphatase PPM11B, putative	N/A	0.42	0.249	0.43	14.9578	14.4017	14.8688	15.3489	13.4459	12.987
TGME49_224000	IMC-associated protein IAP5	IAP5	2.35	0.000135	0.00174	5.5881	4.40029	6.8928	7.80735	9.28077	8.88121
TGME49_224010	hypothetical protein	N/A	0.74	0.0354	0.116	16.6716	16.6541	17.2424	17.5482	11.2367	10.4849
TGME49_224020	hypothetical protein	N/A	-0.05	0.897	0.95	7.25082	7.96834	7.38609	7.79698	11.4544	11.9536
TGME49_224030	hypothetical protein	N/A	0.37	0.221	0.397	16.0275	15.5612	16.0237	16.3326	10.5226	10.3403
TGME49_224040	flagellar associated protein	N/A	1.63	0.478	NA	3.25768	0	4.27274	2.07335	1.82582	2.25225
TGME49_224050	AP2 domain transcription factor AP2X-4	AP2X4	-0.1	0.823	0.907	4.88499	5.33009	5.37806	4.55215	12.077	12.2009
TGME49_224060	thioredoxin, putative	N/A	-0.5	0.11	0.248	15.1779	14.8496	14.764	14.2465	14.0381	14.0253
TGME49_224070	hypothetical protein	N/A	-1.72	0.000594	0.00559	8.16947	8.36149	6.74214	6.34368	8.62004	7.75914
TGME49_224080	Kazal-type serine protease inhibitor domain-containing protein	N/A	0.35	0.325	0.514	14.49	14.0783	14.386	14.8738	10.7503	11.2557
TGME49_224090	enoyl-CoA hydratase/isomerase family protein	N/A	0.75	0.00341	0.0215	12.4032	12.137	12.9157	13.1333	12.705	12.6894
TGME49_224100	hypothetical protein	N/A	0.27	0.418	0.604	8.35701	8.68431	8.74086	8.855	8.79886	8.72863
TGME49_224110	26S proteasome regulatory subunit RPN13, putative	N/A	-0.47	0.172	0.338	12.9086	12.7424	12.6625	11.9752	12.0882	12.338
TGME49_224130	RNA binding protein, putative	N/A	0.08	0.853	0.924	7.57626	8.44714	7.82141	8.441	13.0929	13.5694
TGME49_224140	hypothetical protein	N/A	-0.08	0.795	0.892	8.82037	8.61568	8.85131	8.38671	11.4505	11.3996
TGME49_224150	conserved oligomeric Golgi complex subunit 6	COG6	-0.39	0.338	0.526	7.80526	7.78969	7.2685	7.54767	7.15488	7.0467
TGME49_224160	AP-5 complex subunit mu, putative	N/A	-0.29	0.473	0.655	14.0339	13.9876	13.3456	14.0188	9.6777	8.88121
TGME49_224170	SAG-related sequence SRS60A	SRS60A	1.38	0.00983	0.0472	6.02754	6.13753	7.24379	7.63176	4.48405	4.4925
TGME49_224180	BTB domain-containing protein	N/A	3.06	6.33e-10	1.94e-07	9.11219	8.32576	11.1088	12.2859	14.1046	13.9227
TGME49_224190	cation-transporting atpase family protein	N/A	-0.95	0.0162	0.0673	9.57058	9.03072	8.58235	8.13006	10.5683	10.1314
TGME49_224200	tRNA pseudouridine synthase	N/A	0.32	0.647	0.792	6.65705	5.84111	7.04359	5.99023	6.4178	6.16959
TGME49_224205	ER lumen protein retaining receptor, putative	N/A	0.01	0.977	0.994	11.4674	11.4367	11.3201	11.5893	12.9005	12.9579
TGME49_224210	hypothetical protein	N/A	-1.17	0.0113	0.052	6.31302	6.59325	4.89742	5.66487	10.8483	10.4218
TGME49_224220	serine/threonine-protein phosphatase PP2A catalytic subunit	N/A	-0.93	0.0124	0.0558	11.5054	11.0314	10.6634	9.98259	11.4801	11.4042
TGME49_224230	AP2 domain transcription factor AP2X-3	AP2X3	-1.23	9.79e-05	0.00138	9.45796	9.3615	8.08755	8.27906	7.84585	7.89572
TGME49_224235	translation initiation factor IF-3 protein	N/A	0.28	0.35	0.54	10.0364	10.3303	10.3728	10.561	5.76677	5.68786
TGME49_224240	protein phosphatase PPM1, putative	N/A	-0.51	0.0583	0.162	10.7562	10.6386	10.2953	10.0778	11.8351	11.6073
TGME49_224260	PHD-finger domain-containing protein	N/A	-1.01	0.000189	0.00232	9.67755	9.77985	8.64503	8.79894	11.8086	11.6041
TGME49_224270	vacuolar protein sorting-associated protein 41	VPS41	-0.61	0.0224	0.0847	14.0855	13.9363	13.3083	13.4983	11.4816	11.1582
TGME49_224275	hypothetical protein	N/A	1.84	0.231	0.409	1.94666	2.32863	4.27274	2.89088	3.48289	3.34224
TGME49_224280	CPSF A subunit region protein	N/A	-1.46	1.19e-07	1.12e-05	11.2655	11.0771	9.77841	9.65529	8.60503	8.39701
TGME49_224290	palmitoyltransferase DHHC5	DHHC5	-0.7	0.0844	0.209	7.70026	7.15806	6.97016	6.50528	10.5942	10.3752
TGME49_224310	palmitoyltransferase DHHC6	DHHC6	-1.08	0.116	0.258	4.28956	4.70849	4.27274	1.3809	11.2465	11.136
TGME49_224320	hypothetical protein	N/A	-0.61	0.621	0.772	5.13987	3.70817	3.14658	4.55215	3.48289	3.95599
TGME49_224330	proteasome activator pa28 beta subunit protein	N/A	0.44	0.0937	0.224	13.5419	13.3136	13.7312	13.9922	12.6383	12.7566
TGME49_224340	hypothetical protein	N/A	-0.64	0.177	0.344	12.0086	12.1591	11.948	10.6601	10.8927	11.2699
TGME49_224350	aminopeptidase N2	APN2	-0.79	0.0603	0.166	15.8189	15.2349	15.1529	14.2264	12.7472	12.4642
TGME49_224460	aminopeptidase N3	APN3	0.59	0.0553	0.156	9.06299	8.95964	9.63849	9.38801	9.66961	9.39141
TGME49_224470	hypothetical protein	N/A	2	0.129	0.278	3.0245	0	4.17156	3.40951	6.88975	6.5301
TGME49_224480	cell-cycle-associated protein kinase CLK, putative	N/A	0.02	0.966	0.988	14.1806	13.7821	13.5254	14.3776	10.146	9.66138
TGME49_224490	farnesyl/geranylgeranyl diphosphate synthase	FPPS	-0.38	0.249	0.43	9.98852	9.56103	9.49142	9.32806	8.09715	7.96566
TGME49_224510	hypothetical protein	N/A	-0.2	0.643	0.789	8.53965	8.1011	7.97944	8.27906	8.91447	8.30188
TGME49_224520	alveolin domain containing intermediate filament IMC8	ALV10	2.86	0.000234	0.00271	2.40114	2.81453	3.94503	5.99023	13.2518	13.1979
TGME49_224530	alveolin domain containing intermediate filament IMC5	ALV11	0.82	0.152	0.31	3.45836	4.70849	5.33191	4.64758	11.0433	10.7095
TGME49_224540	hypothetical protein	N/A	0.57	0.167	0.33	7.79603	7.63038	8.30621	8.26408	11.6409	10.7591
TGME49_224560	hypothetical protein	N/A	5.02	0.0133	0.0587	0	0	3.14658	2.89088	5.00225	5.29206
TGME49_224570	hypothetical protein	N/A	2.67	0.18	0.348	0	0	1.8554	0	7.13934	7.61225
TGME49_224575	hypothetical protein	N/A	2.84	0.451	NA	0	0	0	2.07335	3.11024	3.18051
TGME49_224580	RNA recognition motif-containing protein	N/A	-0.66	0.0384	0.123	13.3889	13.5504	13.0789	12.4956	12.2097	12.399
TGME49_224590	DNA-directed RNA polymerase III POLR3C	POLR3C	-1.74	0.0296	0.103	3.93301	5.53175	1.8554	4.09112	11.1411	10.7857
TGME49_224600	GTP binding protein	N/A	-0.12	0.703	0.832	7.75848	7.67367	7.77041	7.39101	11.0855	11.164
TGME49_224610	GYF domain-containing protein	N/A	-0.11	0.763	0.87	15.5387	15.2533	15.065	15.4847	11.3347	10.5705
TGME49_224620	hypothetical protein	N/A	2.65	1.52e-11	1.2e-08	6.08933	5.17806	8.18163	8.42762	13.2617	13.3839
TGME49_224630	zinc finger (CCCH type) motif-containing protein	N/A	0.73	0.127	0.274	6.55123	7.42617	7.6812	7.88773	8.44567	8.31899
TGME49_224650	mRNA capping enzyme, beta chain protein	N/A	-0.46	0.107	0.245	12.7108	12.6715	12.4378	11.9815	10.8416	10.6667
TGME49_224660	transcription factor s-ii (tfiis), central domain-containing protein	N/A	-0.66	0.0954	0.227	10.3024	9.82535	9.73474	9.02901	12.0545	12.433
TGME49_224670	DnaJ domain-containing protein	N/A	-0.03	0.909	0.955	14.652	14.3932	14.3509	14.626	10.9774	10.5458
TGME49_224680	hypothetical protein	N/A	0.89	0.00637	0.0347	16.8013	16.2694	17.5237	17.371	11.5231	11.1088
TGME49_224700	intraconoidal microtubule-associated protein ICMAP2	ICMAP2	1.78	6.79e-05	0.00106	7.0479	7.28444	8.324	9.38801	12.6989	12.363
TGME49_224710	PA domain-containing protein	N/A	3.85	5.54e-07	3.3e-05	11.8329	9.18078	14.1202	15.3992	11.9537	11.8233
TGME49_224720	SPOC domain-containing protein	N/A	-1.39	0.0139	0.0604	8.6667	8.84756	7.98691	6.28553	11.0077	10.8731
TGME49_224730	hypothetical protein	N/A	0.18	0.673	0.813	8.64628	7.87252	8.29422	8.65708	9.57842	9.4447
TGME49_224740	hypothetical protein	N/A	0.64	0.0444	0.134	12.6448	12.7271	12.9909	13.5923	12.4419	12.5976
TGME49_224750	SAG-related sequence SRS40F	SRS40F	0.49	0.236	0.415	10.6729	10.9295	11.4714	11.0899	5.65462	4.68575
TGME49_224760	SAG-related sequence SRS40E	SRS4	0.6	0.239	0.419	8.49468	7.8787	8.4908	9.08122	6.81997	7.6043
TGME49_224770	SAG-related sequence SRS40D	SRS40D	0.49	0.632	0.781	3.93301	3.59264	4.45603	3.94849	4.66862	5.2106
TGME49_224780	SAG-related sequence SRS40B [Source:UniProtKB/TrEMBL;Acc:S8EU84]	SRS40B	5.75	0.05	NA	0	0	1.20743	4.55215	1.82582	1.65581
TGME49_224790	SAG-related sequence SRS40A	SRS40A	0.27	0.455	0.639	9.32942	9.64861	9.85588	9.66957	3.882	3.34224
TGME49_224800	hypothetical protein	N/A	0.3	0.374	0.564	9.49838	10.0013	9.88613	10.232	11.2698	11.4218
TGME49_224810	hypothetical protein	N/A	0.64	0.0752	0.193	16.8863	16.5626	17.301	17.4402	11.8125	11.0522
TGME49_224820	hypothetical protein	N/A	0.92	0.0678	0.18	9.86146	10.7053	10.6352	11.6992	11.1356	11.6276
TGME49_224830	hypothetical protein	N/A	-1.11	0.37	0.559	3.0245	2.81453	0	2.89088	6.96221	7.2023
TGME49_224840	3'5'-cyclic nucleotide phosphodiesterase PDE11	PDE11	2.02	1.31e-06	6.03e-05	6.33869	6.68071	8.0736	8.88468	11.0222	10.9598
TGME49_224845	hypothetical protein	N/A	1.34	0.454	0.638	0	4.91498	4.69354	5.66487	1.33745	1.38585
TGME49_224850	polyadenylate-binding protein PABC	PABPC	-0.25	0.404	0.59	13.3565	13.6475	13.0057	13.4765	13.9058	13.8545
TGME49_224860	exosome component 2, putative	N/A	-0.02	0.939	0.973	15.037	15.1723	15.3083	14.8209	10.9011	11.0231
TGME49_224870	hypothetical protein	N/A	-1.41	2.34e-05	0.00048	11.3317	11.4146	9.71015	10.185	9.84673	9.43689
TGME49_224880	kinesin motor domain-containing protein	N/A	2.55	0.0194	0.077	6.43703	2.00628	8.0309	8.00949	8.93112	8.18679
TGME49_224890	hypothetical protein	N/A	0.95	0.000541	0.00518	14.9452	14.5137	15.6641	15.7288	14.6269	14.7441
TGME49_224900	adenylate kinase, putative	N/A	-0.56	0.286	0.471	6.67731	5.29356	5.58897	5.57062	12.945	13.3537
TGME49_224905	hypothetical protein	N/A	1.11	0.329	0.518	5.19712	4.09534	6.51316	4.44996	1.82582	2.40654
TGME49_224910	divalent cation tolerance protein, CutA1 family protein	N/A	0.82	0.728	0.849	3.79146	0	0	4.55215	5.45145	4.90874
TGME49_224920	GPI ethanolamine phosphate transferase 3, putative	N/A	2.77	0.000379	0.00394	3.25768	2.00628	5.54918	4.90099	9.82179	8.89268
TGME49_224928	histone lysine demethylase JMJD4	JMJD4	0.17	0.701	0.831	8.56705	7.87252	8.56749	8.27906	7.17535	6.86563
TGME49_224932	hypothetical protein	N/A	0.12	0.667	0.808	15.5445	15.8743	15.7774	15.8961	10.4452	10.1418
TGME49_224935	hypothetical protein	N/A	0.92	0.00708	0.0376	10.5615	10.8656	11.2872	11.9291	11.9349	12.0265
TGME49_224940	hypothetical protein	N/A	0.13	0.716	0.84	8.65653	8.29836	8.44817	8.76742	9.69641	9.97063
TGME49_224950	calcium-dependent protein kinase CDPK5	CDPK5	-0.42	0.339	0.528	5.99562	5.98552	5.58897	5.57062	9.31921	9.66903
TGME49_224960	Sec66 domain-containing protein	N/A	-0.64	0.0823	0.205	10.571	10.443	10.1844	9.46208	8.42445	8.2053
TGME49_224970	nucleolar protein Nop52, putative	N/A	0.22	0.582	0.743	13.4021	13.2933	13.0622	13.9359	11.133	10.7284
TGME49_224980	hypothetical protein	N/A	-1.26	0.00643	0.0349	13.2751	12.72	12.2072	11.1245	11.2905	10.8598
TGME49_224990	hypothetical protein	N/A	-0.44	0.31	0.497	12.4262	12.2607	12.3602	11.2256	12.814	13.1274
TGME49_225000	hypothetical protein	N/A	-1.86	1.74e-05	0.00038	8.63078	8.67369	7.19306	6.25555	10.1466	9.93303
TGME49_225005	hypothetical protein	N/A	0	1	NA	0	0	0	0	0	2.07947
TGME49_225010	hypothetical protein	N/A	-1.18	0.000659	0.00605	10.4917	9.95965	9.27373	8.81958	12.2329	12.0733
TGME49_225020	CPH1-interacting protein CIP3	CIP3	1.55	0.087	0.213	6.50663	4.17783	6.19001	7.91676	8.1678	8.01748
TGME49_225028	myosin heavy chain, putative	N/A	-0.35	0.302	0.488	9.9179	10.4922	9.82913	9.93609	10.4552	10.71
TGME49_225050	adenosylhomocysteinase, putative	N/A	-0.12	0.742	0.859	13.2935	13.3722	13.4152	12.9788	8.71047	7.93429
TGME49_225060	nucleoredoxin family protein	N/A	-0.2	0.631	0.781	6.31302	6.17818	6.31389	5.70979	10.2013	10.1588
TGME49_225070	hypothetical protein	N/A	0.33	0.556	0.723	10.6991	11.8787	10.9726	12.2407	12.5455	13.0272
TGME49_225080	ribosomal protein RPS18	RPS18	0.05	0.868	0.934	10.8168	11.021	11.1292	10.7952	13.6941	13.9622
TGME49_225090	WD repeat-containing protein	N/A	-1.81	1.39e-05	0.00033	9.98649	9.85542	8.00172	8.22594	8.50953	7.69694
TGME49_225105	hypothetical protein	N/A	4.91	5.18e-06	0.000155	3.93301	0	7.21865	8.03619	8.79391	7.82221
TGME49_225108	SNF7 family protein	N/A	0.48	0.0596	0.164	12.8456	12.6192	13.3091	13.1084	10.6991	10.5913
TGME49_225110	AP2 domain transcription factor AP2X-2	AP2X2	-0.05	0.895	0.949	11.5195	11.1182	10.8387	11.6176	7.5917	7.17572
TGME49_225120	hypothetical protein	N/A	0.15	0.581	0.743	8.63597	8.94204	8.9915	8.90414	16.0421	16.2272
TGME49_225125	pre-rRNA processing protein	N/A	-1.48	5.79e-05	0.000952	9.23005	9.03349	7.89467	7.36317	10.6705	11.0972
TGME49_225130	hypothetical protein	N/A	0.13	0.756	0.866	12.3366	12.1518	12.0089	12.668	8.90684	8.07615
TGME49_225140	BT1 family protein	N/A	1.44	2.06e-06	8.02e-05	13.3053	12.9987	14.3377	14.8173	11.5464	11.5993
TGME49_225150	hypothetical protein	N/A	1.47	0.0142	0.0612	9.48695	10.6852	10.7482	12.2426	10.3375	10.229
TGME49_225160	hypothetical protein	N/A	-0.17	0.647	0.792	8.34439	8.41349	8.4908	7.86805	14.2102	14.698
TGME49_225170	hypothetical protein	N/A	-0.12	0.709	0.836	16.6091	17.0783	16.7254	16.7664	12.7032	12.2691
TGME49_225190	hypothetical protein	N/A	0.75	0.208	0.381	7.31689	7.15806	7.15381	8.51878	7.25443	7.6043
TGME49_225200	hypothetical protein	N/A	2.13	2.86e-06	0.000101	5.54464	5.68063	7.5959	7.8481	9.09183	8.53935
TGME49_225220	SCP family extracellular subfamily protein	N/A	1.88	8.1e-06	0.000218	10.3203	11.1344	12.2702	12.9649	8.51757	8.42437
TGME49_225230	hypothetical protein	N/A	0.59	0.248	0.428	10.3756	11.0818	10.5808	11.8641	9.48313	9.41433
TGME49_225240	50S ribosomal protein L13, putative	N/A	0.15	0.69	0.825	9.61327	9.87718	9.52514	10.1969	12.2812	12.6677
TGME49_225250	LSU ribosomal protein L14P, putative	N/A	0.09	0.784	0.885	10.1257	10.6231	10.5458	10.4194	11.5442	11.8069
TGME49_225260	DNA-directed RNA polymerase II RPB1	POLR2A	0.08	0.81	0.901	11.2672	10.9604	11.187	11.2178	12.3362	11.7293
TGME49_225270	hypothetical protein	N/A	-0.05	0.888	0.945	13.0522	12.8627	12.6078	13.1561	8.5803	7.87273
TGME49_225280	hypothetical protein	N/A	1.22	0.0214	0.082	9.14893	9.75151	9.89211	11.213	6.14436	5.87133
TGME49_225290	GDA1/CD39 (nucleoside phosphatase) family protein	N/A	0.18	0.611	0.764	10.3122	11.0487	10.9354	10.8848	6.54907	6.62747
TGME49_225300	hypothetical protein	N/A	0.07	0.801	0.896	9.48982	9.6468	9.78485	9.49773	11.8384	12.0606
TGME49_225310	ARF1-directed GTPase-activating protein, putative	N/A	0.49	0.091	0.22	10.2237	9.85385	10.5534	10.5269	12.2793	12.5296
TGME49_225315	hypothetical protein	N/A	1.34	0.000286	0.00314	15.2148	15.363	16.1384	16.9918	9.31461	9.16956
TGME49_225320	hypothetical protein	N/A	2.53	7.81e-08	8.79e-06	7.09385	6.80271	8.89957	9.86837	8.52157	8.6708
TGME49_225330	hypothetical protein	N/A	1.94	0.00697	0.037	4.18022	5.40049	6.24085	7.26124	7.87742	7.40357
TGME49_225340	hypothetical protein	N/A	0.73	0.101	0.235	7.70026	7.55522	7.82974	8.74601	11.5647	11.0133
TGME49_225350	hypothetical protein	N/A	0.42	0.203	0.375	11.4387	11.981	11.9632	12.3346	12.6314	12.8548
TGME49_225360	hypothetical protein	N/A	0.27	0.373	0.562	10.8019	10.4315	10.9325	10.8639	8.8602	9.15331
TGME49_225370	hypothetical protein	N/A	0.18	0.714	0.839	8.54517	7.72943	8.48554	8.24132	4.57928	4.8291
TGME49_225380	hypothetical protein	N/A	0.57	0.0197	0.0779	13.0479	12.8403	13.4437	13.5953	10.3386	10.4608
TGME49_225400	hypothetical protein	N/A	2.77	3.9e-08	4.87e-06	10.3008	9.10639	12.1068	12.9498	9.72098	9.63918
TGME49_225410	histone H3 centromeric CENH3	N/A	0.75	0.00572	0.0319	14.778	14.5764	15.2934	15.551	10.2174	9.937
TGME49_225413	AMMECR1 domain-containing protein	N/A	-0.23	0.659	0.802	5.74991	6.00824	5.01891	6.12898	10.913	11.5299
TGME49_225420	histidine triad domain-containing protein	N/A	0.2	0.503	0.68	9.91577	10.2634	10.37	10.2281	9.96092	10.173
TGME49_225430	Ras-related GTP binding A family protein	N/A	-1.68	0.0132	0.0584	5.01805	5.91512	4.17156	3.61237	8.45616	8.07902
TGME49_225435	hypothetical protein	N/A	0.92	0.068	0.18	4.95306	4.9623	5.90489	5.79563	8.4645	8.80173
TGME49_225440	hypothetical protein	N/A	-0.99	0.003	0.0195	12.4013	12.4111	11.656	11.1369	8.49535	8.05589
TGME49_225450	COP9 signalosome complex subunit 3, putative	N/A	0.66	0.00274	0.0183	12.0864	12.0734	12.7162	12.7703	9.17167	9.16822
TGME49_225460	hypothetical protein	N/A	1.3	0.000346	0.00368	16.1385	16.4032	17.1181	17.9233	10.5842	10.4636
TGME49_225470	peptide methionine sulfoxide reductase	N/A	-0.32	0.281	0.465	12.5713	12.4627	12.4348	11.9153	11.5219	11.5409
TGME49_225480	hypothetical protein	N/A	0.53	0.0413	0.128	13.4581	13.3752	13.8133	14.0651	10.1079	9.86478
TGME49_225490	calcium-dependent protein kinase CDPK2	CDPK2	0.67	0.00745	0.0389	15.0946	14.9919	15.5571	15.8573	14.2538	14.147
TGME49_225500	protein SYS1, putative	N/A	-0.38	0.223	0.4	8.7599	9.21537	8.74527	8.49973	12.3145	12.221
TGME49_225510	RAP domain-containing protein	N/A	0.35	0.153	0.312	11.7724	11.624	12.0348	12.0751	10.5669	10.3564
TGME49_225530	metal cation transporter, ZIP family protein	N/A	1.81	7.05e-05	0.00109	4.28956	4.46742	6.19001	6.09552	9.8814	9.76933
TGME49_225540	hypothetical protein	N/A	0.64	0.284	0.469	2.74623	3.81513	3.67619	4.33997	14.1841	14.5408
TGME49_225550	phosphatidylserine decarboxylase	N/A	0.85	0.000532	0.0051	13.9994	14.0745	14.7833	14.9798	12.0013	12.2097
TGME49_225555	hypothetical protein	N/A	0.14	0.643	0.789	14.854	15.2796	15.033	15.3873	10.9236	10.9711
TGME49_225560	inner membrane complex protein IMC41	IMC41	0.17	0.533	0.705	9.25385	9.53388	9.41324	9.71434	14.0091	14.015
TGME49_225570	hypothetical protein	N/A	-1.41	0.58	NA	3.63451	0	1.8554	1.3809	2.34259	2.99833
TGME49_225580	proteasome (prosome, macropain) 26S subunit, non-ATPase, 9, putative	N/A	-1.19	0.00108	0.00893	7.15292	7.41771	6.36061	5.79563	11.5427	11.6366
TGME49_225590	hypothetical protein	N/A	0.17	0.67	0.81	10.3458	10.0266	10.6281	10.0409	6.57241	6.01021
TGME49_225680	hypothetical protein	N/A	0.73	0.0481	0.142	7.0787	7.4092	7.73539	8.19468	11.1023	11.4614
TGME49_225690	apical cap protein AC7	AC7	2.01	0.000374	0.00391	6.91769	5.70865	8.45357	8.40048	8.66416	8.01748
TGME49_225710	mitochondrial import inner membrane translocase subunit TIM22	TIM22	0	1	1	0	0	0	0	8.83469	9.19229
TGME49_225720	hypothetical protein	N/A	-1.58	0.0524	0.15	4.3912	4.46742	3.81687	0	9.49539	9.69453
TGME49_225730	ATP synthase-associated protein	N/A	0.09	0.808	0.9	10.1053	10.7889	10.5164	10.6371	11.8734	12.2627
TGME49_225745	hypothetical protein	N/A	1.06	0.00563	0.0316	8.30586	7.85382	8.80982	9.42888	12.1676	11.8205
TGME49_225770	tyrosine kinase-like protein TKL8	TKL8	0.08	0.874	0.937	6.8117	7.41771	6.77701	7.58431	9.67231	8.98131
TGME49_225780	hypothetical protein	N/A	-0.18	0.575	0.737	12.3556	13.0068	12.5917	12.4762	12.069	11.9404
TGME49_225790	thioredoxin-like protein 2	TRXL2	0.82	0.0043	0.0255	8.98791	8.82213	9.50708	9.92423	13.6686	13.6058
TGME49_225800	iron-sulfur cluster assembly protein SufC	SUFC	0.33	0.205	0.378	9.89429	9.67192	10.094	10.1344	11.2187	11.1928
TGME49_225810	BIR protein	N/A	-0.99	0.0663	0.177	9.03578	9.24437	8.72755	6.99707	10.8483	11.0822
TGME49_225820	hypothetical protein	N/A	0.79	0.00431	0.0256	13.1581	12.8603	13.7209	13.8851	11.1621	11.4434
TGME49_225830	hypothetical protein	N/A	3.67	2.57e-08	3.81e-06	8.21176	6.21771	10.6328	11.5923	10.5712	10.7796
TGME49_225840	hypothetical protein	N/A	-0.61	0.0562	0.158	11.5125	11.1383	10.918	10.4999	11.1036	10.8769
TGME49_225850	peptidase, M28 family protein	N/A	1.2	0.00757	0.0392	10.077	10.1492	10.6459	11.7678	13.4557	12.9695
TGME49_225860	hypothetical protein	N/A	1.04	0.0396	0.125	6.91769	5.93897	7.5156	7.52271	9.06876	8.6708
TGME49_225870	hypothetical protein	N/A	0.37	0.471	0.654	6.69729	7.94497	7.49481	8.09662	11.3204	11.0449
TGME49_225880	UDP-glucose 4-epimerase	N/A	-0.64	0.155	0.315	14.2413	13.9222	13.9349	12.717	11.7956	11.7867
TGME49_225890	zinc finger (CCCH type) motif-containing protein	N/A	-1.5	0.000268	0.00298	11.5644	11.1758	10.2464	9.39834	10.008	9.67378
TGME49_225900	hypothetical protein	N/A	-0.21	0.59	0.749	8.1766	8.69485	8.06657	8.41411	9.77311	9.40863
TGME49_225910	hypothetical protein	N/A	-1.86	0.000639	0.00592	10.9467	10.3415	9.35674	7.96387	9.05364	8.65356
TGME49_225920	hypothetical protein	N/A	-0.08	0.809	0.901	10.6462	10.0825	10.4451	10.167	12.3766	12.212
TGME49_225930	triose-phosphate isomerase TPI-I	TPI-I	0.05	0.904	0.952	9.92427	10.2716	10.4639	9.7631	14.131	14.5267
TGME49_225940	sialic acid binding protein SABP1	SABP1	1.27	0.000644	0.00594	7.10885	7.4092	8.16856	8.82979	14.5429	14.9245
TGME49_225950	zinc finger (CCCH type) motif-containing protein	N/A	0.42	0.198	0.37	19.1105	19.0604	19.487	19.5264	13.3343	12.6399
TGME49_225953	hypothetical protein	N/A	1.54	5.57e-05	0.000925	14.4426	14.5402	15.5533	16.3845	8.81363	8.38313
TGME49_225955	leucine rich repeat-containing protein	N/A	1.96	0.0409	0.128	3.45836	5.25608	6.1639	6.94167	3.19287	2.67299
TGME49_225958	hypothetical protein	N/A	-0.78	0.392	0.58	4.3912	5.29356	4.36729	3.94849	5.41749	6.04588
TGME49_225960	STE kinase	N/A	0.78	0.0775	0.197	8.84745	8.22751	8.94627	9.66387	10.3767	9.94253
TGME49_225970	mediator complex subunit MED31	MED31	-0.63	0.139	0.292	9.37355	9.04453	8.73643	8.42762	6.48493	5.78954
TGME49_225980	hypothetical protein	N/A	-0.75	0.0113	0.0523	12.024	11.7864	11.1484	11.1774	9.80137	9.37163
TGME49_225990	acyl transferase domain-containing protein	N/A	-0.39	0.449	0.633	9.29705	8.74644	8.57246	8.74061	5.34707	6.44361
TGME49_226000	ATP synthase subunit delta	N/A	-0.18	0.693	0.826	7.23723	7.23713	6.75968	7.30581	7.18042	7.22322
TGME49_226010	pterin-4-alpha-carbinolamine dehydratase	N/A	0.69	0.00981	0.0472	14.5249	14.5581	15.1798	15.2812	11.5989	11.9952
TGME49_226020	transporter, major facilitator family protein	N/A	2.54	1.08e-07	1.08e-05	7.70026	6.89094	9.23976	10.3179	15.8948	16.0825
TGME49_226030	cAMP-dependent protein kinase subunit PKAc1	PKAC1	-0.11	0.765	0.871	8.74558	9.4135	9.03896	8.97484	12.9661	13.5113
TGME49_226040	calmodulin CAM3	CAM3	2.82	3.41e-06	0.000113	8.40031	7.37464	9.79552	11.376	9.94537	9.88297
TGME49_226050	hypothetical protein	N/A	-0.7	0.0286	0.101	11.9768	12.2897	11.6401	11.2207	11.0787	10.7551
TGME49_226060	amino acid transporter AAT1	AAT1	-0.4	0.215	0.39	10.2844	10.8849	10.251	10.181	11.5963	11.6251
TGME49_226068	DnaJ domain-containing protein	N/A	0.21	0.365	0.554	13.4174	13.5691	13.6405	13.7645	11.8069	11.8523
TGME49_226072	Ser/Thr phosphatase family protein	N/A	-0.5	0.169	0.333	10.9414	10.6083	10.6052	9.86341	12.2018	12.093
TGME49_226080	polyA polymerase	N/A	-0.92	0.0259	0.0935	7.36765	7.24672	6.44975	6.28553	10.0481	9.50039
TGME49_226090	DEAD/DEAH box helicase domain-containing protein	N/A	-1.14	0.183	0.351	5.63028	6.09571	4.45603	5.04816	3.34515	3.95599
TGME49_226220	alveolin domain containing intermediate filament IMC9	ALV6	-0.84	0.152	0.311	14.7675	14.2538	14.3	12.6207	10.1152	9.29713
TGME49_226230	hypothetical protein	N/A	3.92	0.00251	0.0171	10.8816	7.20799	13.1344	14.4133	10.5808	10.6857
TGME49_226240	bud site selection protein, putative	N/A	0.71	0.215	0.39	7.83262	6.46771	8.31809	7.60823	9.5765	9.75952
TGME49_226245	hypothetical protein	N/A	0.26	0.745	0.86	5.45359	6.68071	6.63219	6.25555	3.72426	2.89782
TGME49_226250	DEAD (Asp-Glu-Ala-Asp) box polypeptide DDX3X	DDX3X	-0.15	0.539	0.71	12.6611	12.8826	12.5627	12.6832	13.1452	13.3083
TGME49_226260	hypothetical protein	N/A	3.59	2.45e-09	5.85e-07	7.53244	5.65206	10.1248	10.7204	11.734	11.7245
TGME49_226270	TMEM147 domain-containing protein	N/A	0.49	0.202	0.374	6.41307	6.57814	7.14048	6.62736	10.6178	10.8981
TGME49_226280	ribosomal protein L28, putative	N/A	-0.09	0.811	0.901	12.5122	12.9075	12.8404	12.4003	10.1818	10.7796
TGME49_226290	hypothetical protein	N/A	-0.38	0.424	0.609	7.83262	7.3212	7.65332	6.57976	12.4349	12.9787
TGME49_226300	2,4-dienoyl CoA reductase 2, peroxisomal family protein	N/A	0.39	0.0783	0.198	17.818	17.9627	18.2467	18.3103	13.4397	13.4298
TGME49_226310	zinc finger (CCCH type) motif-containing protein	N/A	0.78	0.153	0.311	10.7985	11.7401	11.2651	12.6652	13.067	13.3371
TGME49_226320	RNA binding protein, putative	N/A	-0.83	0.00124	0.00991	12.7514	12.9402	11.8785	12.1483	10.5035	10.5628
TGME49_226330	hypothetical protein	N/A	2.02	0.00984	0.0472	4.28956	3.17737	5.18389	6.16168	7.77386	7.30399
TGME49_226340	hypothetical protein	N/A	0.2	0.558	0.724	14.6	14.3595	14.5752	14.7852	10.3539	9.67283
TGME49_226350	hypothetical protein	N/A	-2.04	2.79e-05	0.000546	10.0616	9.4962	8.13536	7.29111	6.97977	6.4701
TGME49_226370	dgat2l1-prov protein	N/A	0.53	0.0929	0.223	8.2796	8.27513	8.49604	9.06835	13.4958	13.5489
TGME49_226380	dense granule protein GRA35	GRA35	1.87	0.00305	0.0197	4.81356	6.158	6.4712	8.09662	16.9484	17.2063
TGME49_226390	hypothetical protein	N/A	0.38	0.262	0.445	11.7123	11.3213	11.8944	11.9171	8.68572	8.12699
TGME49_226400	lipoic acid synthase LIPA	LIPA	0.48	0.797	0.894	4.57522	0	3.34551	4.55215	11.2303	11.169
TGME49_226410	EF-1 guanine nucleotide exchange domain-containing protein	N/A	-0.21	0.716	0.841	9.07831	8.79625	9.07793	8.29389	5.41749	6.65852
TGME49_226420	dense granule protein GRA69	GRA69	-0.24	0.547	0.716	13.9034	14.8906	14.0653	14.3894	12.4852	12.573
TGME49_226430	reticulon protein	N/A	-0.3	0.265	0.448	10.9776	11.3709	10.9013	10.8688	14.6651	14.8141
TGME49_226440	SWI2/SNF2-containing protein RAD16	RAD16	-0.36	0.259	0.441	9.8548	10.0718	9.5379	9.69213	11.4267	10.9703
TGME49_226450	hypothetical protein	N/A	0.02	0.952	0.98	9.72699	9.90318	9.58785	10.0605	6.05882	5.31172
TGME49_226460	hypothetical protein	N/A	0.49	0.228	0.405	6.69729	6.21771	6.75968	7.1352	10.0229	10.2935
TGME49_226470	hypothetical protein	N/A	2.68	7.44e-05	0.00113	6.23314	4.70849	7.3048	8.8993	12.0613	11.6155
TGME49_226480	DNA topoisomerase family protein	N/A	0.7	0.0449	0.135	12.0446	11.5012	12.4351	12.5656	8.76043	9.28225
TGME49_226490	hypothetical protein	N/A	3.19	1.52e-05	0.000342	10.6954	8.31668	12.3595	13.6355	10.7336	10.9907
TGME49_226500	succinate dehydrogenase subunit SDH11	SDH11	-0.35	0.294	0.479	11.8015	11.9618	11.71	11.3327	14.3619	14.9416
TGME49_226510	Sec23/Sec24 trunk domain-containing protein	N/A	0.18	0.549	0.717	12.4314	12.4317	12.3638	12.8175	12.2256	11.9713
TGME49_226515	hypothetical protein	N/A	0.72	0.0109	0.0508	14.9475	14.7495	15.6727	15.463	9.62473	9.22507
TGME49_226520	LSM domain-containing protein	N/A	0.75	0.0662	0.177	7.63959	8.09049	8.38742	8.83992	9.25696	9.67378
TGME49_226532	hypothetical protein	N/A	1.2	0.000776	0.0069	15.0259	15.4458	16.0527	16.7669	9.23763	9.23282
TGME49_226540	protein kinase	N/A	2.06	4.15e-06	0.000132	10.2029	9.61938	11.3773	12.4312	14.756	15.0226
TGME49_226550	TBC domain-containing protein TBC9	TBC9	-2.04	0.00648	0.0351	4.57522	5.33009	3.94503	0	11.7482	12.2091
TGME49_226560	pre-mRNA-splicing factor CWC24, putative	N/A	-0.52	0.255	0.437	12.8543	13.0274	12.8905	11.7186	12.7885	13.31
TGME49_226565	hypothetical protein	N/A	-0.68	0.187	0.357	8.54517	8.94204	8.52197	7.39101	7.56481	7.66672
TGME49_226570	hypothetical protein	N/A	0.25	0.394	0.582	14.0305	14.5002	14.5746	14.4845	11.8503	12.0237
TGME49_226580	hypothetical protein	N/A	-0.76	0.0186	0.0746	8.23245	8.64859	7.66268	7.73314	14.1456	14.5349
TGME49_226590	cytochrome c oxidase subunit COX2a	COX2a	-0.16	0.672	0.812	11.2188	11.4472	11.3097	11.0336	7.58789	8.37615
TGME49_226600	syntaxin 5, putative	STX5	0.67	0.00152	0.0115	15.8774	15.8141	16.5229	16.5173	12.1949	12.2488
TGME49_226610	centrosomal protein CEP76, putative	CEP76	0.41	0.464	0.647	6.96791	7.14786	6.74214	7.95457	8.09178	8.0933
TGME49_226620	hypothetical protein	N/A	0.65	0.34	0.528	7.36765	7.84754	7.20591	8.87978	5.96788	5.54562
TGME49_226640	zinc binding protein, putative	N/A	0.02	0.957	0.983	6.73644	7.20799	7.37475	6.53053	12.2396	12.4616
TGME49_226660	m6A methyltransferase component VIRMA	VIRMA	-0.64	0.108	0.246	8.68182	8.64497	7.56631	8.37281	9.99586	9.9441
TGME49_226670	hypothetical protein	N/A	-0.3	0.378	0.568	9.2403	9.18827	9.11927	8.68546	9.36337	9.61267
TGME49_226680	hypothetical protein	N/A	-0.69	0.00868	0.0432	14.1862	14.2134	13.6802	13.3239	11.4754	11.3305
TGME49_226690	hypothetical protein	N/A	1.79	0.0944	0.225	5.3564	2.32863	6.72439	5.52107	7.4519	6.87887
TGME49_226700	nuclease, putative	N/A	-0.52	0.518	0.693	4.65912	6.59325	5.28424	5.57062	7.86172	7.4263
TGME49_226705	hypothetical protein	N/A	0.2	0.449	0.632	10.6044	10.6313	10.7537	10.8676	9.91906	10.1418
TGME49_226710	hypothetical protein	N/A	0.32	0.37	0.559	15.9018	15.7034	16.0953	16.1551	10.721	9.91707
TGME49_226720	translin family protein	N/A	-0.99	0.0621	0.169	9.53771	9.74645	9.14952	7.91676	5.48463	6.0222
TGME49_226730	aconitate hydratase ACN/IRP	N/A	-0.7	0.0356	0.117	15.4403	15.1574	14.8968	14.2335	13.9378	13.8383
TGME49_226740	zinc finger, C3HC4 type (RING finger) domain-containing protein	N/A	0.3	0.603	0.757	5.71113	4.9623	4.69354	6.25555	13.9929	14.335
TGME49_226755	3'5'-cyclic nucleotide phosphodiesterase PDE18	PDE18	-0.25	0.825	0.907	3.25768	6.40059	4.61863	5.79563	6.40052	6.49612
TGME49_226780	zinc finger, C3HC4 type (RING finger) domain-containing protein	N/A	-1.47	0.246	0.426	4.3912	1.59055	1.8554	2.53927	8.0001	7.91513
TGME49_226790	ABC transporter, ATP-binding domain-containing protein	N/A	-1.46	0.000421	0.00426	9.30684	9.12989	7.97944	7.51007	8.37664	7.81533
TGME49_226800	eukaryotic glutathione synthase, atp binding domain-containing protein	N/A	0.05	0.91	0.956	13.4229	13.2527	13.1517	13.5878	8.3111	7.41271
TGME49_226810	histone lysine methyltransferase SET1	SET1	-1.04	0.00136	0.0105	10.7763	10.6332	9.53026	9.79211	9.77059	9.30082
TGME49_226820	hypothetical protein	N/A	0.59	0.835	NA	0	3.46704	3.52031	2.53927	1.01295	0.620822
TGME49_226825	protein phosphatase inhibitor protein	N/A	0.74	0.00973	0.0469	14.4296	14.3467	15.1525	15.1078	12.7295	13.2227
TGME49_226830	DnaK family protein	N/A	-1.09	0.000135	0.00174	10.36	10.6513	9.47027	9.38455	11.1297	10.9046
TGME49_226840	JmjC domain-containing protein	N/A	-0.17	0.479	0.659	11.7806	11.9899	11.7842	11.6424	11.3642	11.3508
TGME49_226850	TBC domain-containing protein TBC15	TBC15	-0.6	0.228	0.406	5.96298	6.82848	5.80707	5.95335	9.70787	9.36105
TGME49_226860	SAG-related sequence SRS67	SRS67	1.87	0.0246	0.0905	6.3887	3.70817	6.21565	8.07961	15.7238	15.9921
TGME49_226870	tubulin gamma chain	N/A	0.09	0.78	0.882	8.82492	8.9062	9.02089	8.8993	9.94164	10.4559
TGME49_226890	origin recognition complex subunit 3, putative	ORC3	-1.69	9.05e-05	0.00131	10.6854	10.3692	9.16934	8.42762	6.83934	6.24312
TGME49_226900	hypothetical protein	N/A	-0.38	0.261	0.444	12.9046	12.7069	12.6522	12.1786	10.8923	10.4104
TGME49_226910	Amylo-alpha-1,6-glucosidase	N/A	-1.07	0.00425	0.0253	13.7384	13.3617	12.6984	12.2644	12.3142	11.639
TGME49_226920	hypothetical protein	N/A	4.17	0.137	0.289	0	0	3.14658	0	11.1238	11.01
TGME49_226940	ubiquitin carboxyl-terminal hydrolase	N/A	-0.76	0.0409	0.128	8.85636	8.98849	8.16198	8.16273	5.83268	5.40622
TGME49_226950	IgA-specific metalloendopeptidase	N/A	-1.42	0.0183	0.0737	5.74991	6.158	4.53962	4.64758	9.21062	8.32384
TGME49_226960	phosphofructokinase PFKII	PFKII	-0.24	0.647	0.792	6.88322	7.40064	6.51316	7.26124	8.36556	7.96876
TGME49_226970	ribosomal protein RPS11	RPS11	0.14	0.609	0.762	12.3061	12.4616	12.5024	12.5622	12.71	13.1433
TGME49_226980	hypothetical protein	N/A	0.21	0.437	0.622	11.8686	11.9931	12.0852	12.1881	12.8057	13.1393
TGME49_226985	hypothetical protein	N/A	-0.22	0.615	0.767	8.81123	9.31897	9.1824	8.4674	9.42556	9.87638
TGME49_226990	hypothetical protein	N/A	0.21	0.47	0.653	7.60827	7.89708	7.90259	8.04498	13.1803	13.389
TGME49_227000	hypothetical protein	N/A	2.43	4.59e-05	0.000803	6.82991	5.09559	8.28819	8.88468	10.7114	10.7095
TGME49_227010	rhoptry kinase family protein ROP30	ROP30	0.29	0.385	0.574	6.5291	6.34812	6.59359	6.84431	11.8679	11.7634
TGME49_227020	histone deacetylase SIR2	SIR2	1	0.000295	0.0032	13.0713	13.0423	13.975	14.1356	13.6486	14.0651
TGME49_227030	IMP1-like protein, putative	N/A	0.63	0.0483	0.143	13.6336	14.2234	14.4382	14.7329	11.9212	11.9643
TGME49_227040	hypothetical protein	N/A	0.82	0.581	0.743	3.79146	2.00628	3.81687	3.94849	2.72229	4.00513
TGME49_227050	ATPase/histidine kinase/DNA gyrase B/HSP90 domain-containing protein	N/A	0.6	0.0496	0.145	14.6999	14.5315	14.909	15.4665	14.4302	14.4057
TGME49_227060	hypothetical protein	N/A	-0.22	0.436	0.622	9.44915	9.54363	9.40769	9.11918	10.9229	10.7879
TGME49_227070	hypothetical protein	N/A	0.45	0.0689	0.182	15.599	15.8754	16.1396	16.2547	9.58226	9.44024
TGME49_227080	PCIF1 WW domain-containing protein	N/A	-0.53	0.153	0.312	9.32622	9.25391	9.04254	8.40048	9.29604	9.53949
TGME49_227090	aspartokinase	N/A	0.39	0.116	0.259	14.1106	14.0141	14.4946	14.4102	9.00873	8.73775
TGME49_227100	glutaredoxin 5	GRX5	0.94	0.072	0.188	12.6744	13.5667	13.3374	14.6308	18.6397	18.9185
TGME49_227115	hypothetical protein	N/A	-0.66	0.344	0.533	3.79146	3.70817	3.34551	2.89088	10.0831	9.58364
TGME49_227130	hypothetical protein	N/A	0	1	NA	0	0	0	0	2.34259	0
TGME49_227140	PUA domain-containing protein	N/A	5.06	0.00264	0.0177	0	0	2.64086	3.40951	7.91746	7.46194
TGME49_227150	glutaredoxin 4	GRX4	0.41	0.479	0.659	5.19712	5.86621	5.18389	6.50528	10.4883	10.1098
TGME49_227260	RIO1 family protein	N/A	0.55	0.209	0.383	6.26026	6.45122	6.95502	6.86431	8.67138	8.26956
TGME49_227270	hypothetical protein	N/A	-0.97	0.0135	0.0593	9.56243	9.32803	8.83072	8.00949	11.6526	11.9748
TGME49_227280	dense granule protein GRA3	GRA3	-0.05	0.927	0.965	6.41307	6.33019	6.95502	5.11647	12.0558	11.9022
TGME49_227290	histone deacetylase HDAC3	HDAC3	-0.63	0.144	0.299	10.2992	9.99136	9.96195	8.88468	13.1848	13.4423
TGME49_227300	hypothetical protein	N/A	-1.45	0.0171	0.0701	7.96214	7.42617	6.63219	5.79563	3.97833	4.3476
TGME49_227310	hypothetical protein	N/A	0.04	0.924	0.964	8.88713	8.33477	8.46431	8.86496	8.13943	8.68971
TGME49_227320	hypothetical protein	N/A	0.35	0.625	0.775	3.93301	4.32988	3.94503	4.90099	7.76376	7.68191
TGME49_227330	hypothetical protein	N/A	0.03	0.959	0.983	7.12369	6.84119	7.07194	6.99707	4.85778	4.98422
TGME49_227335	hypothetical protein	N/A	0.44	0.267	0.449	7.94552	8.5201	8.82656	8.5684	8.42872	8.6727
TGME49_227350	hypothetical protein	N/A	-0.45	0.498	0.676	6.61565	6.11677	5.58897	6.22493	5.195	4.90874
TGME49_227360	ribosomal protein RPL3	RPL3	-0.11	0.712	0.838	10.4773	10.6414	10.6459	10.2204	13.7422	14.094
TGME49_227370	hydrolase CocE/NonD family protein	N/A	0.88	0.0207	0.0803	17.7424	17.2286	18.2685	18.5037	12.1429	11.3886
TGME49_227380	hypothetical protein	N/A	0.42	0.204	0.377	12.5474	12.9618	13.0982	13.2746	11.4913	12.0036
TGME49_227390	SET domain-containing protein	N/A	-0.24	0.647	0.792	7.92024	7.12725	7.54624	7.08494	7.83302	7.36644
TGME49_227400	hypothetical protein	N/A	1.23	0.528	0.701	0	3.59264	3.52031	4.09112	2.60648	3.09229
TGME49_227410	hypothetical protein	N/A	-0.23	0.53	0.702	8.65141	8.16316	8.20102	8.20256	9.27011	9.17226
TGME49_227420	4-hydroxy-3-methylbut-2-enyl diphosphate reductase	LYTB	-1.34	0.0316	0.107	6.98427	5.7631	5.23493	5.11647	8.51957	8.27458
TGME49_227430	amino acid transporter AAT2	AAT2	0.35	0.477	0.657	11.3173	12.3942	11.7658	12.6969	7.74334	7.70812
TGME49_227440	WD domain, G-beta repeat-containing protein	N/A	-0.84	0.0749	0.193	12.3909	12.1864	11.9717	10.6544	12.7163	12.6604
TGME49_227450	hydrolase, NUDIX family protein	N/A	0.23	0.529	0.702	14.3075	14.0692	14.0301	14.7264	11.8689	11.4781
TGME49_227560	IWS1 transcription factor, putative	N/A	0.05	0.869	0.935	10.4452	10.5221	10.6681	10.3748	12.7528	13.0046
TGME49_227570	amino acid transporter AAT3	AAT3	0.67	0.00488	0.0281	18.0942	17.945	18.6653	18.7183	15.1602	15.3803
TGME49_227580	amino acid transporter AAT4	AAT4	0.93	2.94e-05	0.000565	15.8522	15.8603	16.697	16.8693	13.7585	13.7872
TGME49_227590	hypothetical protein	N/A	3.38	8.46e-06	0.000226	8.79278	6.31205	10.6739	11.8802	8.38106	8.52467
TGME49_227600	ribosomal protein RPL34	RPL34	-0.35	0.376	0.566	8.36327	8.03071	8.01639	7.66635	11.1605	11.8647
TGME49_227610	hypothetical protein	N/A	1.33	0.158	0.318	0	2.81453	3.67619	2.53927	10.0166	9.49503
TGME49_227615	hypothetical protein	N/A	3.33	0.102	0.238	0	0	1.20743	2.07335	5.75322	6.74785
TGME49_227620	dense granule protein GRA2	GRA2	0.11	0.827	0.909	5.08025	6.33019	5.42278	6.3719	15.6391	15.5951
TGME49_227630	hypothetical protein	N/A	-0.02	0.982	0.997	4.73841	6.00824	5.42278	5.57062	4.30988	4.00513
TGME49_227650	microtubule-associated protein EB1	EB1	0.34	0.235	0.414	15.0612	15.0694	15.2886	15.5119	9.83793	9.38794
TGME49_227660	DNA methyltransferase DNMTa	DNMTa	-0.2	0.477	0.657	9.59208	9.73458	9.49927	9.43892	8.31572	8.33829
TGME49_227780	P-type ATPase, putative	N/A	-0.86	0.0504	0.147	7.16732	7.22748	5.90489	6.69594	10.8416	10.3552
TGME49_227790	glycosyltransferase, group 1 family protein	N/A	-0.86	0.157	0.317	5.3564	5.43444	4.89742	4.09112	8.10784	7.90546
TGME49_227800	Eps15-like protein	EPS15L	-1	0.00343	0.0216	11.2394	11.0459	10.394	9.83582	9.93939	9.60172
TGME49_227810	rhoptry kinase family protein ROP11 (incomplete catalytic triad)	ROP11	3.43	5.04e-06	0.000154	5.86037	3.81513	7.57624	9.12748	10.6782	10.5259
TGME49_227820	hypothetical protein	N/A	-1.24	0.0156	0.0653	9.43435	8.8507	7.64391	8.17078	8.74511	7.78751
TGME49_227830	mitochondrial inner membrane translocase TIM44, putative	N/A	-1.22	0.0029	0.019	10.4496	10.3269	9.57056	8.61637	11.6615	11.3944
TGME49_227840	Memo family protein	N/A	-0.56	0.223	0.4	13.1771	13.0681	13.0693	11.7981	12.4204	12.5552
TGME49_227850	peptidyl-prolyl cis-trans isomerase, cyclophilin-type domain-containing protein	N/A	-1.33	0.0136	0.0596	9.10099	8.93019	8.23903	6.78258	9.40404	9.53845
TGME49_227860	hypothetical protein	N/A	-0.87	0.0447	0.135	10.0246	9.67547	9.40769	8.39361	10.6257	10.6923
TGME49_227870	Tim10/DDP family zinc finger superfamily protein	N/A	-0.13	0.632	0.781	11.8329	12.147	11.9651	11.7692	10.4073	10.4897
TGME49_227880	hypothetical protein	N/A	-0.63	0.0145	0.0623	12.8268	12.8044	12.0602	12.3057	8.32032	8.10179
TGME49_227890	hypothetical protein	N/A	-0.56	0.0791	0.199	11.8609	11.5295	11.3773	10.8614	11.2075	11.2371
TGME49_227900	AP2 domain transcription factor AP2X-1	AP2X1	0.2	0.871	0.936	1.27942	4.17783	1.20743	4.44996	8.69461	8.99658
TGME49_227910	cytochrome b-c1 complex subunit 8	QCR8	0.1	0.727	0.848	10.0006	10.2515	10.1779	10.283	12.357	12.669
TGME49_227920	succinate dehydrogenase subunit SDH10	SDH10	0.85	0.0175	0.0711	6.43703	6.84119	7.4523	7.6777	11.0391	11.4048
TGME49_227930	hypothetical protein	N/A	-0.2	0.565	0.73	10.7322	10.645	10.347	10.6283	6.92644	6.34207
TGME49_227940	hypothetical protein	N/A	-0.43	0.512	0.688	8.02673	7.54748	7.4523	7.30581	4.66862	3.18051
TGME49_227948	toxolysin TLN2	TLN2	-0.7	0.02	0.0786	8.21176	8.15809	7.55631	7.41833	11.2026	10.9903
TGME49_227952	14-3-3 superfamily protein	N/A	0.47	0.243	0.423	10.4258	11.0616	10.8242	11.584	11.4291	11.3709
TGME49_227960	PCI domain-containing protein	N/A	-0.46	0.219	0.395	13.2584	13.4507	13.2671	12.4029	13.4816	13.637
TGME49_227970	histone family DNA-binding protein	N/A	2.14	1.39e-05	0.00033	6.36391	6.84119	8.23276	9.13984	8.39203	8.36207
TGME49_227980	hypothetical protein	N/A	-0.29	0.316	0.503	9.87249	10.0945	9.56558	9.83328	11.0324	11.1934
TGME49_227990	hypothetical protein	N/A	-0.64	0.348	0.538	6.33869	5.86621	5.73797	5.11647	6.7871	6.13689
TGME49_228000	splicing factor 3A subunit 2, putative	N/A	-0.58	0.262	0.445	9.84364	9.86011	9.83535	8.35171	11.5276	11.7533
TGME49_228010	hypothetical protein	N/A	-0.12	0.644	0.79	13.9616	13.872	13.9028	13.6766	11.0582	10.7261
TGME49_228020	hypothetical protein	N/A	0.22	0.606	0.759	8.48322	9.11688	9.06388	9.05536	3.19287	3.74074
TGME49_228030	hypothetical protein	N/A	-0.02	0.967	0.988	15.8321	15.7925	15.3311	16.1482	10.3364	9.80533
TGME49_228040	PPIC-type PPIASE domain-containing protein	N/A	0.06	0.85	0.922	13.2312	13.256	12.9531	13.592	9.42982	9.08638
TGME49_228050	hypothetical protein	N/A	2.08	4.86e-05	0.000834	6.5291	6.91519	8.69145	8.91856	2.82948	3.79764
TGME49_228060	hypothetical protein	N/A	-1.09	0.00386	0.0236	11.7946	11.4688	10.8953	10.1095	9.68396	9.65658
TGME49_228065	hypothetical protein	N/A	0.14	0.732	0.851	7.64988	7.80923	7.87871	7.85811	8.2641	8.74681
TGME49_228070	zinc finger, C2H2 type domain-containing protein	N/A	3.64	0.00173	0.0129	1.94666	0	4.17156	3.7902	10.7997	10.0964
TGME49_228080	dihydrouridine synthase (dus) protein	N/A	0.41	0.222	0.398	7.80526	8.11163	8.12863	8.59259	11.382	11.3016
TGME49_228100	hypothetical protein	N/A	0.92	0.00995	0.0476	7.4641	7.36587	8.31809	8.33747	7.91137	8.04123
TGME49_228110	transmembrane protein TMEM14C	TMEM14C	0.39	0.153	0.312	8.69679	8.86322	9.04612	9.29896	14.7546	14.9966
TGME49_228120	hypothetical protein	N/A	-1.08	0.00282	0.0186	9.77714	9.76991	8.42087	8.92333	11.1672	10.648
TGME49_228130	START domain-containing protein	N/A	-0.38	0.619	0.77	6.57302	4.86606	5.84042	5.24409	8.05635	7.57204
TGME49_228145	hypothetical protein	N/A	-0.36	0.552	0.72	6.67731	6.36582	6.61302	5.57062	7.33396	7.59229
TGME49_228150	hypothetical protein	N/A	0.39	0.221	0.397	10.9643	11.1162	11.1543	11.6647	10.8186	10.5664
TGME49_228160	acid phosphatase	N/A	1.2	0.311	0.497	4.0619	2.32863	4.61863	4.44996	4.60968	4.42187
TGME49_228170	dense granule protein GRA44	GRA44	0.58	0.043	0.132	7.72966	7.34817	8.18812	8.05372	15.8132	15.823
TGME49_228175	hypothetical protein	N/A	0.69	0.0375	0.121	16.672	16.5246	17.2631	17.3165	11.0824	10.3787
TGME49_228180	cytochrome C oxidase assembly factor COX15, putative	N/A	0.85	0.00809	0.0411	7.62923	7.80275	8.40424	8.72429	10.2654	10.3955
TGME49_228190	eukaryotic initiation factor-3, subunit 5, putative	N/A	0.03	0.959	0.983	5.40581	3.81513	5.23493	4.2209	9.98793	10.1777
TGME49_228200	vacuolar (h+)-atpase g subunit protein	N/A	0.53	0.0273	0.0971	14.6892	14.4802	15.0253	15.2123	12.2883	12.2485
TGME49_228210	26S proteasome regulatory subunit	N/A	-0.22	0.47	0.652	14.3659	14.6119	14.5146	13.9831	11.7123	11.8314
TGME49_228220	MYND finger domain-containing protein	N/A	0.08	0.915	0.958	8.28621	10.4273	8.93474	10.3466	7.48507	7.35701
TGME49_228230	hypothetical protein	N/A	0.09	0.819	0.904	14.1032	13.9846	13.6513	14.4982	9.3261	8.83269
TGME49_228240	hypothetical protein	N/A	-0.8	0.0021	0.0149	11.1397	11.1466	10.4491	10.2358	7.5175	7.50529
TGME49_228250	elongation factor Tu GTP binding domain-containing protein	N/A	-0.16	0.819	0.904	4.95306	4.91498	4.45603	5.04816	6.4767	6.61169
TGME49_228270	hypothetical protein	N/A	-0.03	0.991	NA	3.79146	0	1.20743	3.61237	1.82582	1.88313
TGME49_228280	hypothetical protein	N/A	-0.61	0.181	0.349	10.2202	10.2031	10.0766	8.87485	10.5985	10.4537
TGME49_228290	serine hydrolase ASH1	ASH1	-0.6	0.293	0.479	8.47745	8.40495	8.16198	7.44514	5.0694	6.16959
TGME49_228300	CCDC25 protein	N/A	-0.68	0.105	0.242	10.7053	10.7881	10.4891	9.46536	11.3051	11.6108
TGME49_228310	hypothetical protein	N/A	0.02	0.944	0.976	9.11962	9.40924	9.19856	9.38801	6.64758	6.76935
TGME49_228320	ribosome-binding factor A, putative	N/A	-1.46	0.000363	0.00382	8.68182	8.21291	7.2685	6.69594	9.714	9.57349
[truncated: 5,975 more rows]

## Sheet: 2.3
ToxoDB ID Release 68	Product description	Gene name	LFC	p-value	Adjusted p-value	Unsporulated oocysts Sample 1	Unsporulated oocysts Sample 2	Sporulating oocysts Sample 1	Sporulating oocysts Sample 2	Sporulated oocysts Sample 1	Sporulated oocysts Sample 2
TGME49_200010	dense granule protein GRA20	GRA20	7.71	6.78e-73	1.81e-71	5.3564	4.46742	5.42278	5.30391	12.3929	12.8133
TGME49_200110	hypothetical protein	N/A	6.12	0.0937	0.12	0	0	0	0	4.23386	3.79764
TGME49_200130	Toxoplasma gondii family C protein	N/A	9.06	3.4e-09	7.92e-09	1.27942	0	2.30094	0	8.3272	8.33349
TGME49_200230	microneme protein MIC17C	MIC17C	8.45	1.91e-05	3.53e-05	4.3912	0	4.61863	7.1352	11.6871	11.8263
TGME49_200240	microneme protein MIC17B	MIC17B	8.08	6.99e-09	1.6e-08	4.88499	2.59194	4.17156	7.44514	12.0882	12.178
TGME49_200250	microneme protein MIC17A	MIC17A	-0.58	0.11	0.139	11.375	12.0469	11.7669	12.198	11.0882	11.2509
TGME49_200260	hypothetical protein	N/A	1.83	1.26e-06	2.51e-06	7.88583	7.77652	8.0309	8.62226	9.53453	9.7622
TGME49_200270	PAN/Apple domain-containing protein	N/A	2.06	4.93e-12	1.32e-11	10.2064	10.3801	10.6209	11.1036	12.348	12.364
TGME49_200280	WD domain, G-beta repeat-containing protein	N/A	-0.4	0.314	0.363	12.1741	11.9168	12.0725	11.1953	11.8173	11.465
TGME49_200290	rhomboid protease ROM1	ROM1	5.8	2.82e-81	1.08e-79	8.77408	9.05275	9.74138	10.0648	14.5325	14.8879
TGME49_200310	hypothetical protein	N/A	0.46	0.483	0.533	5.82448	6.63764	7.31669	8.3303	6.32008	7.07575
TGME49_200320	hypoxanthine-xanthine-guanine phosphoribosyl transferase HXGPRT	HXGPRT	-0.47	0.427	0.479	6.8479	6.99699	6.77701	6.60375	5.88332	6.87226
TGME49_200330	basal complex component BCC9	BCC9	8.82	4.96e-79	1.7e-77	4.18022	3.32946	6.26561	6.34368	12.2513	12.6799
TGME49_200340	hypothetical protein	N/A	3.93	1.04e-21	4.22e-21	6.5291	6.11677	6.33744	6.4534	10.5	9.93937
TGME49_200350	subtilisin SUB3	SUB3	-1.01	1.82e-05	3.35e-05	15.6256	15.5238	16.3566	16.4931	14.4595	14.6585
TGME49_200360	hypothetical protein	N/A	11.44	1.38e-64	2.63e-63	3.93301	4.17783	3.67619	6.02619	15.1833	15.6151
TGME49_200370	protein farnesyltransferase subunit beta, putative	N/A	-0.78	0.00419	0.00631	11.9583	11.6125	12.2176	12.2416	10.9088	11.113
TGME49_200385	bradyzoite-formation deficient protein BFD1	BFD1	3.49	1.86e-18	6.65e-18	8.913	8.60826	9.85791	10.7596	12.2636	12.2386
TGME49_200400	serine/threonine-protein phosphatase PP2A regulatory subunit PR48	PR48	-1.15	0.000426	0.000706	12.904	12.6841	12.6813	13.1248	11.8567	11.4125
TGME49_200410	hypothetical protein	N/A	1.67	0.00138	0.00219	7.93715	8.26101	6.68821	7.91676	9.99226	9.50894
TGME49_200430	cytidine and deoxycytidylate deaminase zinc-binding region domain-containing protein	N/A	-2.41	1.5e-13	4.34e-13	9.02	9.27045	9.29794	9.21965	6.65488	6.84553
TGME49_200440	hypothetical protein	N/A	0.84	0.027	0.037	10.0597	9.79463	8.85539	8.21819	10.9741	10.5317
TGME49_200450	hypothetical protein	N/A	1.04	0.000591	0.000967	10.7479	10.6313	10.7228	11.1654	11.8515	11.5961
TGME49_200460	hypothetical protein	N/A	1.18	0.0139	0.0197	10.3138	11.067	10.8804	11.9906	11.8173	12.0151
TGME49_200470	hypothetical protein	N/A	6.98	1.26e-35	8.21e-35	4.65912	6.53184	5.99649	6.09552	12.8231	12.8802
TGME49_200480	Toxoplasma gondii family B protein	N/A	-1.88	0.182	0.223	4.0619	4.17783	3.52031	2.07335	2.19002	2.67299
TGME49_200590	Toxoplasma gondii family C protein	N/A	4.87	6.2e-18	2.17e-17	3.79146	4.25586	2.91577	3.61237	8.94161	8.73593
TGME49_200595	hypothetical protein	N/A	-9.07	2.55e-07	5.31e-07	5.54464	5.86621	5.50827	7.33477	0	0
TGME49_200600	hypothetical protein	N/A	-6.88	2.16e-57	2.91e-56	10.6397	10.4729	10.852	10.1324	3.83131	3.74074
TGME49_200700	Toxoplasma gondii family C protein	N/A	5.25	0.273	0.32	0	0	2.30094	0	4.15361	0
TGME49_201100	hypothetical protein	N/A	-3.75	2.4e-08	5.3e-08	9.18476	8.77654	8.79714	7.36317	5.75322	4.55983
TGME49_201110	hypothetical protein	N/A	3.12	1.09e-17	3.79e-17	7.59768	7.76322	7.7265	7.23075	10.578	10.9948
TGME49_201120	ELMO/CED-12 family protein	N/A	-3.86	6.81e-19	2.48e-18	13.3937	13.2244	12.0973	11.646	9.88529	8.82245
TGME49_201130	rhoptry kinase family protein ROP33	ROP33	3.47	4.22e-07	8.69e-07	7.44059	9.04453	7.18009	8.87978	12.0974	11.7337
TGME49_201140	hypothetical protein	N/A	-1.78	3.54e-08	7.73e-08	12.9583	13.0383	12.3841	11.9117	11.4248	10.991
TGME49_201150	heavy metal translocating P-type ATPase subfamily protein	N/A	3.9	2.16e-05	3.98e-05	2.40114	3.59264	3.94503	4.09112	7.30639	6.3033
TGME49_201160	hypothetical protein	N/A	0.57	0.858	0.882	2.74623	0	0	2.07335	2.48056	2.25225
TGME49_201170	hypothetical protein	N/A	3.16	0.00937	0.0135	10.0693	6.68071	11.9556	13.11	12.2543	12.4594
TGME49_201180	megakaryocyte stimulating factor MSF	MSF	-1.99	9.54e-06	1.79e-05	8.41245	8.06904	7.81303	7.89747	5.93225	6.54679
TGME49_201200	cleavage and polyadenylation specificity factor subunit 4	CPSF4	-2.04	7.35e-07	1.49e-06	13.0283	12.4036	13.0591	12.2141	10.6669	10.7542
TGME49_201210	hypothetical protein	N/A	3.92	1.79e-08	3.99e-08	3.45836	4.86606	3.52031	3.7902	8.38106	8.00243
TGME49_201220	preconoidal ring protein PCR4	PCR4	-4.39	1.2e-36	8.1e-36	12.1639	11.9089	12.5096	12.8392	7.93257	7.31378
TGME49_201230	kinesin motor domain-containing protein	N/A	-1.35	0.0157	0.0221	8.52295	7.76988	7.83801	7.47147	7.23993	6.3033
TGME49_201240	hypothetical protein	N/A	-6.01	3.81e-78	1.26e-76	16.7922	16.7964	16.889	16.643	11.0585	10.437
TGME49_201250	histone lysine methyltransferase, SET, putative	N/A	-1.72	7.75e-05	0.000137	11.1961	10.582	10.2908	9.38801	9.19566	9.20022
TGME49_201260	sugar transporter ST3	ST3	1.47	1.01e-05	1.9e-05	12.628	13.2097	13.5222	13.9003	14.3379	14.4879
TGME49_201270	hypothetical protein	N/A	7.41	0.00416	0.00627	0	0	0	3.7902	5.17481	5.35027
TGME49_201380	chorismate synthase, putative	N/A	6.1	1.53e-37	1.06e-36	4.81356	5.05251	4.61863	5.57062	11.2319	10.7058
TGME49_201390	hypothetical protein	N/A	3.64	1.46e-14	4.41e-14	11.5111	12.4785	11.7804	12.6148	15.4591	15.9352
TGME49_201400	Sin3-associated polypeptide SAP18	SAP18	-1.21	3.62e-06	6.96e-06	13.7752	13.583	13.7697	13.488	12.5504	12.3889
TGME49_201520	protein phosphatase PPM3G, putative	N/A	3.03	1.73e-10	4.3e-10	6.65705	7.60824	7.70855	7.06779	10.3094	10.1629
TGME49_201630	protein phosphatase PPM3H, putative	N/A	0.69	0.145	0.18	7.55451	7.17824	8.11506	9.00669	8.08368	8.05004
TGME49_201660	hypothetical protein	N/A	-5.05	1.34e-60	2.09e-59	11.6399	11.7695	11.6918	11.3064	6.80691	6.51321
TGME49_201670	DnaJ domain-containing protein	N/A	2.68	6.09e-17	2.04e-16	9.11219	8.65221	8.32988	8.58658	11.6542	11.4868
TGME49_201680	eukaryotic initiation factor-3 subunit 10, putative	N/A	4.37	3.06e-36	2.03e-35	6.90056	6.46771	5.87301	5.52107	11.0335	11.0635
TGME49_201690	BT1 family protein	N/A	5.51	8.8e-22	3.6e-21	5.78768	7.39203	5.99649	6.90351	12.2697	12.3471
TGME49_201700	protein transport protein SEC13	N/A	-3.54	6.5e-15	2e-14	9.30032	8.70184	8.85131	8.24132	5.46814	5.56214
TGME49_201710	WD domain, G-beta repeat-containing protein	N/A	-1.56	1.25e-07	2.65e-07	11.2896	11.3714	11.4096	11.1522	9.56297	9.95587
TGME49_201720	alpha N-terminal protein methyltransferase NTM1	N/A	0.78	0.219	0.263	8.01881	7.10634	7.63444	6.19365	8.50953	8.30679
TGME49_201730	hypothetical protein	N/A	8.02	2.88e-12	7.83e-12	2.40114	0	3.81687	5.57062	8.47073	9.29466
TGME49_201740	hypothetical protein	N/A	8.43	3.45e-06	6.66e-06	4.3912	0	6.36061	7.81765	11.4977	11.9426
TGME49_201750	Tctex-1 family protein	N/A	-5.13	1.73e-14	5.19e-14	8.58861	10.065	9.1824	10.4211	4.15361	4.68575
TGME49_201760	thioredoxin-like associated protein TLAP4	TLAP4	-0.39	0.398	0.449	10.556	11.5744	10.9986	11.7718	10.7022	10.8136
TGME49_201770	cullin 3, putative	N/A	-4.2	2.2e-59	3.24e-58	14.9204	14.7192	14.7538	15.061	10.6224	10.6236
TGME49_201775	hypothetical protein	N/A	5.49	0.206	0.248	0	0	0	0	3.60862	3.26364
TGME49_201780	microneme protein MIC2	MIC2	14.51	6.24e-69	1.41e-67	3.45836	1.00419	2.64086	4.90099	16.9492	16.7505
TGME49_201785	hypothetical protein	N/A	3.25	2.74e-06	5.34e-06	4.95306	6.00824	5.33191	6.25555	8.12109	9.27351
TGME49_201790	centrosomal protein CEP170, putative	CEP170	0.27	0.488	0.538	11.7166	11.4092	11.0315	10.2008	11.6947	11.9707
TGME49_201800	ATP synthase-associated protein	N/A	0.95	0.00396	0.00599	9.77243	10.0998	10.325	10.8476	10.9528	10.8452
TGME49_201810	hypothetical protein	N/A	1.59	0.0568	0.075	5.63028	3.9147	6.02578	5.46977	6.69796	6.40751
TGME49_201820	hypothetical protein	N/A	3.8	3.83e-14	1.14e-13	4.81356	5.05251	4.27274	3.7902	8.77894	8.61054
TGME49_201830	ribosomal protein L37	N/A	-3.06	8.95e-42	7.18e-41	12.4425	12.5077	13.0308	12.9577	9.45411	9.37046
TGME49_201840	aspartyl protease ASP1	ASP1	-3.95	1.94e-78	6.45e-77	18.0193	18.03	18.1715	18.1173	14.0949	14.0459
TGME49_201850	WD domain, G-beta repeat-containing protein	N/A	-2.36	6.39e-14	1.88e-13	15.8118	16.2027	16.3395	16.3392	13.3947	13.8934
TGME49_201860	hypothetical protein	N/A	-0.38	0.242	0.288	13.0957	13.3259	13.2377	13.8459	12.7642	12.9069
TGME49_201870	tetratricopeptide repeat-containing protein	N/A	0.77	0.016	0.0225	10.887	10.806	10.4878	10.2662	11.3187	11.8601
TGME49_201880	cytochrome b-c1 complex subunit 9	QCR9	-0.25	0.446	0.497	11.6819	12.1283	11.7324	11.2945	11.543	11.7884
TGME49_201900	hypothetical protein	N/A	-0.78	0.00119	0.0019	12.1312	12.3382	12.3645	12.4884	11.4635	11.4548
TGME49_202010	hypothetical protein	N/A	-6.19	7.57e-54	9.16e-53	13.4659	13.6417	13.5002	14.0099	7.73991	6.87887
TGME49_202020	DnAK-TPR	N/A	10.56	2.41e-201	4.93e-198	4.65912	4.86606	7.60563	7.68896	15.1482	15.4098
TGME49_202040	hypothetical protein	N/A	1.5	1.13e-05	2.11e-05	8.78813	9.30068	9.36822	9.68933	10.6326	10.493
TGME49_202050	hypothetical protein	N/A	0.78	0.398	0.449	4.3912	6.00824	4.83261	5.99023	5.68349	6.57147
TGME49_202065	hypothetical protein	N/A	1.44	0.045	0.0602	4.81356	4.91498	4.17156	4.64758	6.1547	6.38911
TGME49_202070	hypothetical protein	N/A	-1.23	0.00178	0.0028	10.5642	10.4082	9.48879	9.82054	9.60129	8.82073
TGME49_202080	hypothetical protein	N/A	3.91	3.68e-21	1.47e-20	6.57302	6.05264	5.18389	5.18169	10.4282	9.97758
TGME49_202090	hypothetical protein	N/A	-5.41	4.73e-37	3.22e-36	19.0498	19.375	18.8811	17.9621	14.0764	13.4753
TGME49_202100	hypothetical protein	N/A	-5.22	2.16e-68	4.73e-67	20.9375	21.4576	21.2841	21.3645	16.1027	15.8917
TGME49_202110	hypothetical protein	N/A	-5.18	8.56e-77	2.71e-75	21.5651	21.8376	22.0393	22.0649	16.7104	16.3189
TGME49_202120	PH domain-containing protein	ICAP16	2.54	3.31e-16	1.08e-15	10.1959	9.93169	9.67129	9.21965	12.7262	12.4868
TGME49_202140	enoyl-CoA hydratase/isomerase family protein	N/A	-1.8	1.19e-11	3.13e-11	11.3035	11.2402	11.0759	10.8701	9.35666	9.58263
TGME49_202160	ABC1 family protein	N/A	0.95	0.0241	0.0333	9.01205	9.42832	8.78862	7.96387	10.3403	10.02
TGME49_202170	hypothetical protein	N/A	4.03	0.0232	0.0321	3.0245	1.00419	4.83261	0	6.14436	5.9234
TGME49_202180	hypothetical protein	N/A	2.39	1.17e-11	3.08e-11	7.54352	7.47593	6.95502	6.60375	10.03	9.74241
TGME49_202190	hypothetical protein	N/A	-2.92	6.16e-31	3.39e-30	14.3728	14.6068	13.991	13.7493	11.5664	11.5792
TGME49_202200	hypothetical protein	N/A	0.72	0.293	0.341	8.96749	10.8052	10.0501	11.505	10.9015	10.8565
TGME49_202205	hypothetical protein	N/A	-5.57	4.09e-52	4.6e-51	16.2091	16.3179	17.2414	18.1048	10.6551	10.7311
TGME49_202210	nucleoside diphosphate kinase	N/A	-4.16	8.7e-12	2.31e-11	8.15509	9.23477	8.82656	8.86496	3.97833	5.16807
TGME49_202220	IMC suture-associated protein ISAP1	ISAP1	5.84	0.00477	0.00713	4.95306	0	5.93607	8.35171	9.86102	9.60671
TGME49_202230	histone deacetylase HDAC5	HDAC5	4.72	5.11e-39	3.72e-38	6.82991	7.50018	5.93607	6.22493	11.9582	11.8763
TGME49_202240	RAP domain-containing protein	N/A	4.87	5.66e-13	1.6e-12	4.73841	3.32946	5.18389	4.55215	9.24491	8.58854
TGME49_202250	hypothetical protein	N/A	1	0.00507	0.00754	10.8134	10.7286	10.6529	9.97571	11.9528	11.5728
TGME49_202255	hypothetical protein	N/A	4.19	3.85e-35	2.45e-34	6.8117	6.51607	6.68821	6.86431	10.9771	10.7007
TGME49_202285	EGF family domain-containing protein	N/A	-6.49	5.33e-68	1.15e-66	15.3797	15.8169	16.4121	17.1379	9.25576	8.9767
TGME49_202290	membrane protein, putative	N/A	0.77	0.281	0.329	6.63649	7.87252	7.5361	5.95335	8.08097	8.21578
TGME49_202300	inosine triphosphate pyrophosphatase, putative	N/A	4.78	3.76e-19	1.39e-18	7.85947	6.50013	11.1088	11.9758	11.9991	12.1997
TGME49_202310	O-sialoglycoprotein endopeptidase	N/A	5.96	3.07e-88	1.49e-86	8.76937	8.34819	9.16934	9.22739	14.3602	14.6753
TGME49_202340	proline dehydrogenase	N/A	11.38	1.03e-34	6.42e-34	0	2.00628	2.30094	3.40951	11.9948	12.3465
TGME49_202350	50S ribosomal protein L21, putative	N/A	-1.25	3.19e-05	5.79e-05	12.5464	12.4593	12.9435	13.4443	11.1428	11.3559
TGME49_202360	methylase, putative	N/A	4.8	0.00518	0.0077	2.40114	0	0	1.3809	6.08068	5.52892
TGME49_202370	T-complex protein 1, epsilon subunit (TCP-1-epsilon), putative	N/A	-5.13	2.31e-86	1.05e-84	12.8848	12.6155	12.7086	12.8673	7.64404	7.62802
TGME49_202375	hypothetical protein	N/A	-0.2	0.925	0.94	3.45836	2.00628	4.36729	1.3809	0.593608	3.5552
TGME49_202380	rab GDI alpha, putative	N/A	2.47	5.17e-21	2.04e-20	11.3587	11.5758	11.7357	11.9069	13.8091	14.0591
TGME49_202390	mature soluble cytoskeleton protein MSC1B	MSC1B	4.61	3.61e-08	7.88e-08	5.74991	3.00733	7.66268	8.68546	9.73914	9.19758
TGME49_202400	calcium binding egf domain-containing protein	N/A	-4.93	2.24e-63	4.01e-62	16.63	16.2024	16.9776	17.2082	11.6178	11.3875
TGME49_202410	CRAL/TRIO domain-containing protein	N/A	-3.4	1.65e-26	7.94e-26	14.8843	14.7966	14.1706	13.6556	11.6238	11.2384
TGME49_202420	hypothetical protein	N/A	2.17	4.61e-06	8.82e-06	6.28688	5.70865	7.87871	8.44764	8.17798	8.15448
TGME49_202430	hypothetical protein	N/A	-2.78	4.13e-35	2.63e-34	15.0721	15.0753	15.3576	15.5345	12.255	12.3222
TGME49_202440	hypothetical protein	N/A	0.22	0.854	0.878	5.3564	4.46742	5.66539	2.89088	5.45145	4.85614
TGME49_202445	hypothetical protein	N/A	2.09	0.46	0.511	0	3.00733	0	0	4.54823	3.18051
TGME49_202450	hypothetical protein	N/A	3.1	2.31e-08	5.1e-08	9.16696	8.85384	9.30093	7.75474	11.742	12.4163
TGME49_202460	diacylglycerol kinase accessory domain (presumed) domain-containing protein	DGK1	-0.24	0.379	0.43	9.29705	9.33479	9.28285	9.33165	9.13687	9.00415
TGME49_202470	rRNA metabolism protein, SBDS family protein	N/A	3.23	2.17e-18	7.76e-18	9.2128	8.79951	8.2138	7.48445	12.1896	12.3117
TGME49_202480	hypothetical protein	N/A	3.66	8.13e-10	1.95e-09	4.18022	4.81543	5.13096	4.44996	8.07826	8.21317
TGME49_202490	AP2 domain transcription factor AP2VIIa-7	AP2VIIA7	-4.01	7.32e-29	3.8e-28	14.4573	14.3146	13.5247	14.2353	10.5664	10.1582
TGME49_202500	glideosome-associated protein with multiple-membrane spans GAPM1A	GAPM1A	5.59	2e-09	4.71e-09	6.08933	2.32863	8.35894	9.37064	10.7048	10.7479
TGME49_202510	glideosome-associated protein with multiple-membrane spans GAPM1B	GAPM1B	-0.35	0.75	0.783	5.89539	5.05251	4.69354	2.07335	5.04737	5.31172
TGME49_202520	hypothetical protein	N/A	-2.51	1.57e-16	5.19e-16	14.8372	14.5362	14.8977	15.4019	12.1804	12.1816
TGME49_202530	aspartate-tRNA ligase	N/A	-2.32	8.93e-21	3.49e-20	12.4348	12.5794	13.0763	12.9116	10.0945	10.2798
TGME49_202540	3'5'-cyclic nucleotide phosphodiesterase PDE1	PDE1	-2.06	1.24e-11	3.28e-11	13.6751	13.2841	12.9353	12.6472	11.5753	11.2749
TGME49_202550	basal complex component BCC6	BCC6	0.93	0.0511	0.0679	8.44827	8.30296	8.16198	9.13573	9.5444	9.00717
TGME49_202568	FAM32A domain-containing protein	N/A	8.09	3.34e-19	1.24e-18	1.27942	2.00628	2.30094	3.40951	9.03136	9.54366
TGME49_202572	ribophorin i protein	N/A	-0.83	0.0246	0.034	9.31009	9.47393	9.16276	8.69107	8.75874	8.35023
TGME49_202580	chaperone protein ClpB5, putative	ClpB5	1.49	0.00145	0.00229	8.92151	9.59707	8.58235	9.52626	10.9543	10.5913
TGME49_202590	hypothetical protein	N/A	0.77	0.15	0.185	11.0209	10.5839	10.0661	8.52508	11.4934	11.6713
TGME49_202600	hypothetical protein	N/A	-2.14	0.0344	0.0466	4.3912	5.25608	5.84042	4.73709	3.02259	2.78978
TGME49_202610	protein phosphatase PPM3D	PPM3D	1.2	0.000951	0.00153	11.7342	12.0101	11.8128	12.6003	13.0934	13.0597
TGME49_202620	dense granule protein GRA64	GRA64	-0.46	0.372	0.423	9.05913	9.99563	9.4325	10.5206	9.06739	9.2068
TGME49_202630	ATP-dependent metallopeptidase HflB subfamily protein	N/A	2.3	2.01e-13	5.77e-13	10.5831	10.4831	9.87008	9.40176	12.9942	12.6497
TGME49_202640	tRNA pseudouridine synthase 1	PUS1	6.55	0.0162	0.0227	0	0	1.8554	0	4.38209	4.4925
TGME49_202650	hypothetical protein	N/A	3.21	3.45e-11	8.89e-11	5.71113	6.11677	5.58897	5.41657	9.41591	8.7576
TGME49_202680	cytochrome b-c1 complex subunit 2	QCR2	-1.19	2.37e-06	4.63e-06	13.3496	13.5356	12.6807	12.4504	12.1874	12.3211
TGME49_202690	DNA-directed RNA polymerase II RPB9	POLR2I	2.75	1.84e-19	6.87e-19	8.24608	8.18825	7.65332	7.30581	10.8677	11.0453
TGME49_202700	hypothetical protein	N/A	-1.15	1.73e-06	3.41e-06	11.0337	11.0293	10.7394	10.8552	9.90227	9.87059
TGME49_202720	RNB family domain-containing protein	N/A	-1.26	0.104	0.132	6.86567	6.63764	5.54918	4.2209	5.88332	5.00852
TGME49_202730	hypothetical protein	N/A	-6.38	1.09e-50	1.18e-49	13.9366	13.7801	12.8013	13.1248	7.92956	6.84553
TGME49_202740	pseudouridine synthase, putative	N/A	0.32	0.355	0.405	8.68182	8.4262	7.50524	7.23075	8.96384	8.79301
TGME49_202750	3' exoribonuclease family, domain 1 domain-containing protein	N/A	4.01	8.2e-32	4.68e-31	8.65141	8.153	8.20742	7.88773	12.2451	12.5834
TGME49_202760	hypothetical protein	N/A	1.09	0.0134	0.019	9.2872	9.1273	8.20102	7.18376	10.1277	10.4453
TGME49_202770	RNA recognition motif-containing protein	N/A	6.08	2.05e-40	1.57e-39	8.14057	7.45127	8.52709	9.5847	13.9556	13.8612
TGME49_202780	rhoptry kinase family protein ROP25	ROP25	1.79	7.49e-08	1.61e-07	9.47832	9.23718	9.14952	9.51365	11.3432	10.9263
TGME49_202790	dihydrouridine synthase (dus) protein	N/A	-2.24	1.73e-09	4.08e-09	12.8837	13.094	12.4155	11.5998	10.6248	10.8648
TGME49_202800	cytochrome c oxidase assembly protein COX11 protein, putative	N/A	-3.42	9.96e-18	3.46e-17	8.98791	9.06092	9.39371	10.0756	5.66913	5.59461
TGME49_202810	mitochondrial import inner membrane translocase subunit TIM14	PAM18	-1.13	8.12e-06	1.53e-05	11.0934	10.881	11.7043	11.7955	9.79228	9.92268
TGME49_202820	ubiquitin-conjugating enzyme subfamily protein	N/A	1.06	7.14e-05	0.000126	9.3548	9.19571	9.65733	9.5665	10.3595	10.304
TGME49_202830	Elicitor-responsive protein, putative	N/A	13.53	7.64e-98	5.74e-96	2.74623	3.00733	5.33191	6.73991	16.0998	16.3264
TGME49_202840	FHA domain-containing protein	N/A	-1.4	6.87e-07	1.4e-06	14.1518	14.1813	13.6574	14.008	12.9194	12.5911
TGME49_202850	ATP-binding domain-containing protein	N/A	-2.18	0.00254	0.00392	7.1957	7.20799	6.05448	7.68896	5.25392	4.8291
TGME49_202860	hypothetical protein	N/A	-0.39	0.358	0.408	11.5806	11.0161	10.9257	10.012	10.927	10.9473
TGME49_202870	SAP domain-containing protein	N/A	-0.41	0.397	0.448	10.1976	9.69136	9.73917	8.59857	9.63954	9.47554
TGME49_202880	carrier superfamily protein	N/A	-2.67	5.05e-07	1.04e-06	11.6762	11.0918	10.6945	9.75509	9.18939	8.09045
TGME49_202890	hypothetical protein	N/A	1.01	0.00464	0.00695	13.0147	13.1067	13.2365	12.5633	13.824	14.287
TGME49_202900	zinc finger (CCCH type) motif-containing protein	N/A	-3.46	7.23e-18	2.52e-17	9.02791	9.22268	8.7051	9.14802	5.45145	5.91056
TGME49_202910	zinc carboxypeptidase superfamily protein	N/A	-5.66	4.96e-63	8.69e-62	14.9561	14.9832	15.8685	16.5614	9.42663	9.18564
TGME49_202920	p-aminobenzoic acid synthase	N/A	-2.88	3.51e-11	9.03e-11	11.9093	11.7105	12.6639	13.7852	8.9944	8.87131
TGME49_202930	IMC sutures component ISC5	ISC5	10.79	2.05e-13	5.89e-13	3.45836	0	2.64086	2.07335	12.9571	13.1413
TGME49_202940	hypothetical protein	N/A	1.06	0.00822	0.012	11.7251	11.8373	11.5383	10.5579	12.7298	12.9469
TGME49_202950	hypothetical protein	N/A	1.12	0.00204	0.00317	9.76061	10.3201	9.60735	10.1011	11.3004	11.0747
TGME49_202960	glycine cleavage H-protein	N/A	-1.85	1.81e-08	4.03e-08	9.43435	9.25866	9.75456	10.167	7.56092	7.44868
TGME49_202970	hypothetical protein	N/A	-5.68	2.44e-27	1.21e-26	8.55615	8.44714	8.08059	7.54767	2.82948	3.18051
TGME49_202975	hypothetical protein	N/A	3.19	2.21e-06	4.32e-06	4.88499	5.00811	4.36729	5.87664	8.1105	8.08475
TGME49_202980	hypothetical protein	N/A	8.99	1.26e-25	5.88e-25	2.74623	0	2.91577	2.07335	10.3595	10.1997
TGME49_203010	aurora-related kinase ARK3	ARK3	4.81	4.15e-14	1.23e-13	7.20968	5.09559	9.27067	9.36363	11.4423	11.1242
TGME49_203020	ribosome biogenesis GTPase Der protein	N/A	3.9	5.74e-10	1.39e-09	4.73841	4.25586	5.18389	6.28553	8.48514	8.18945
TGME49_203030	N-methyl-D-aspartate receptor-associated protein	N/A	-0.73	0.00149	0.00235	14.0147	14.152	14.4462	14.4839	13.2617	13.4337
TGME49_203040	hypothetical protein	N/A	-1.59	8.21e-06	1.55e-05	12.6067	12.6411	12.7098	13.4959	11.1169	10.9536
TGME49_203050	AP2 domain transcription factor AP2VIIa-6	AP2VIIA6	1.6	2.96e-05	5.39e-05	8.23245	8.61568	9.51743	10.1529	9.90611	10.1582
TGME49_203060	hypothetical protein	N/A	6.17	1.28e-59	1.92e-58	6.77456	5.91512	6.8928	6.97884	12.4973	12.5877
TGME49_203070	hypothetical protein	N/A	-5.64	8.29e-48	8.12e-47	14.2085	14.4835	15.4066	16.3284	8.71397	8.70838
TGME49_203080	RNA recognition motif-containing protein	N/A	2.56	6.06e-11	1.54e-10	9.05139	9.90469	9.48353	9.26173	11.9537	12.2417
TGME49_203090	hypothetical protein	N/A	-6.62	3.65e-125	6.64e-123	15.3466	15.4407	15.9114	16.0339	8.97702	8.53726
TGME49_203100	hypothetical protein	N/A	-7.16	1.54e-153	6.01e-151	12.4058	12.4341	12.9863	12.997	5.41749	5.16807
TGME49_203110	citrate synthase, putative	N/A	-3.83	1.88e-61	3.09e-60	13.2699	13.2839	13.6578	13.7025	9.5444	9.35396
TGME49_203120	hypothetical protein	N/A	5.33	3.47e-23	1.49e-22	5.19712	4.32988	4.45603	3.17338	9.99226	10.175
TGME49_203135	dynein heavy chain family protein	N/A	-3.8	5.86e-41	4.54e-40	13.1919	13.4112	14.1349	14.5355	9.4362	9.57145
TGME49_203150	hypothetical protein	N/A	-1.39	0.000211	0.00036	12.0056	11.361	10.9199	10.544	10.5201	10.1049
TGME49_203160	hypothetical protein	N/A	6.88	1e-30	5.49e-30	6.28688	6.00824	6.66978	4.55215	12.9915	13.0299
TGME49_203170	OB-fold nucleic acid binding domain-containing protein	N/A	-3.49	7.04e-35	4.45e-34	10.3521	10.5763	10.4786	10.3179	6.99712	6.98679
TGME49_203180	leucine rich repeat-containing protein	N/A	-2.04	9.88e-09	2.23e-08	11.3766	11.1228	10.1893	10.6385	9.45515	8.92496
TGME49_203200	hypothetical protein	N/A	-3.07	1.01e-10	2.54e-10	9.89212	9.23718	9.4461	8.87485	6.85211	6.15877
TGME49_203220	DEAD/DEAH box helicase domain-containing protein	N/A	2.6	6.78e-09	1.55e-08	8.32526	7.57818	6.66978	6.02619	10.7869	10.3611
TGME49_203230	hypothetical protein	N/A	0.45	0.153	0.188	13.9102	14.2878	14.3722	14.6831	14.3497	14.7438
TGME49_203240	hypothetical protein	N/A	5.94	1.47e-79	5.11e-78	10.5409	10.5687	10.577	11.1973	16.5575	16.4302
TGME49_203250	hypothetical protein	N/A	1.93	0.00311	0.00475	7.36765	6.158	8.34739	9.85843	8.84909	8.76118
TGME49_203260	cell cycle checkpoint protein RAD17, putative	N/A	-2.51	1.32e-10	3.29e-10	11.3389	11.1714	10.6447	10.5777	9.1264	8.2442
TGME49_203270	ATP-dependent Clp endopeptidase, proteolytic subunit ClpP domain-containing protein	N/A	-3.64	6.32e-27	3.08e-26	12.6988	12.4591	12.0808	11.605	9.16016	8.6972
TGME49_203280	hypothetical protein	N/A	-3	1.06e-28	5.49e-28	15.1883	14.9348	15.6097	15.7713	11.9115	12.2142
TGME49_203290	dense granule protein GRA34	GRA34	2.09	0.012	0.0171	4.0619	5.98552	4.83261	4.90099	6.99712	7.71182
TGME49_203300	DUF726 domain-containing protein	N/A	0.22	0.555	0.603	10.0827	9.98134	8.94627	9.57563	10.4546	10.0155
TGME49_203310	dense granule protein GRA7	GRA7	13.49	1.31e-139	3.56e-137	4.88499	6.46771	5.23493	5.99023	19.2092	19.5029
TGME49_203320	zinc finger in N-recognin protein	N/A	-0.62	0.0438	0.0587	12.1652	11.896	11.3758	11.1634	11.6217	11.1891
TGME49_203330	hypothetical protein	N/A	5.65	3.28e-07	6.8e-07	1.27942	3.32946	4.27274	1.3809	8.22782	7.95944
TGME49_203340	metallo-beta-lactamase domain-containing protein	N/A	-0.19	0.616	0.659	10.9999	11.1511	10.3643	9.90746	10.4862	11.2004
TGME49_203350	hypothetical protein	N/A	-0.49	0.739	0.774	3.0245	3.32946	2.91577	2.89088	2.48056	2.99833
TGME49_203358	hypothetical protein	ICAP10	-0.47	0.0334	0.0454	12.5009	12.4833	12.4504	12.3542	12.0438	11.9977
TGME49_203362	prefoldin, putative	ICAP5	-0.41	0.191	0.232	11.6489	12.0687	12.3403	12.0272	11.306	11.6038
TGME49_203370	Utp12 domain-containing protein	N/A	5.65	3.89e-18	1.38e-17	5.40581	5.40049	2.91577	5.41657	10.913	11.1106
TGME49_203375	cpw-wpc domain-containing protein	N/A	-5.86	2.42e-48	2.41e-47	13.9824	14.0797	15.0107	16.0211	8.15498	8.1974
TGME49_203380	DnaJ domain-containing protein	N/A	2.18	7.41e-06	1.4e-05	7.27761	7.04173	7.08591	8.10506	9.48415	9.17226
TGME49_203390	CRAL/TRIO domain-containing protein	N/A	5.44	2.12e-23	9.19e-23	6.28688	6.45122	4.76475	2.07335	11.6811	11.8972
TGME49_203400	hypothetical protein	N/A	2.96	2.77e-21	1.11e-20	8.48896	8.28447	7.55631	7.1996	11.215	11.4562
TGME49_203420	4'-phosphopantetheinyl transferase domain-containing protein	N/A	2.6	7.64e-08	1.64e-07	8.11108	7.39203	7.57624	6.67344	10.5702	10.1697
TGME49_203440	anaphase-promoting complex subunit APC10	APC10	-2.17	7.65e-05	0.000135	8.73595	8.09049	7.18009	6.47957	6.5801	5.9234
TGME49_203450	brain colonization protein BCP1	BCP1	-1.26	0.0605	0.0797	6.50663	5.93897	5.33191	5.30391	4.88288	5.12426
TGME49_203460	mitochondrial distribution and morphology protein, putative	N/A	4.73	1.62e-18	5.81e-18	4.95306	5.56278	5.54918	4.33997	9.76638	10.1851
TGME49_203470	hypothetical protein	N/A	-2.94	0.000578	0.000948	5.89539	6.53184	6.05448	6.73991	3.97833	2.54591
TGME49_203480	hypothetical protein	N/A	-0.95	0.00299	0.00458	10.2098	10.1858	8.80982	8.62226	9.45201	9.02366
TGME49_203490	GNL3L/Grn1 GTPase	N/A	-3.25	6.48e-11	1.65e-10	10.6779	10.0636	10.1382	8.97944	7.14454	7.18641
TGME49_203500	alanine dehydrogenase/pyridine nucleotide transhydrogenase domain-containing protein	N/A	-1.04	0.0182	0.0254	10.0481	9.7001	10.0905	11.0717	8.70168	8.98438
TGME49_203505	hypothetical protein	N/A	2.8	5.56e-15	1.72e-14	7.16732	7.48406	8.20742	7.73314	10.1218	10.1459
TGME49_203510	zinc finger, C3HC4 type (RING finger) domain-containing protein	N/A	-2.92	5.01e-21	1.99e-20	13.7158	13.6843	13.2111	12.6687	10.6483	10.9046
TGME49_203520	hypothetical protein	N/A	-2.97	6.81e-07	1.38e-06	12.3242	11.5553	10.9354	9.3949	9.3811	8.55593
TGME49_203540	RNA binding protein, putative	N/A	-1.17	3.23e-05	5.85e-05	14.5777	14.691	15.1219	15.5556	13.3678	13.5524
TGME49_203590	hypothetical protein	N/A	-2.13	0.339	0.388	4.28956	0	4.61863	2.53927	1.6022	1.65581
TGME49_203600	dense granule protein GRA50	GRA50	-0.01	0.988	0.992	8.05798	7.88485	8.54237	8.51878	7.64771	8.22877
TGME49_203610	3'-5' exoribonuclease csl4, putative	N/A	8.15	6.76e-60	1.03e-58	4.18022	3.59264	5.90489	5.04816	11.7492	12.1027
TGME49_203620	ribosomal protein RPS35	RPS35	0.95	0.202	0.244	5.86037	5.00811	4.27274	3.61237	6.45175	6.39834
TGME49_203630	ribosomal protein RPL44	RPL44	0.72	0.0448	0.06	8.38191	8.26573	7.87066	7.73314	8.81036	9.24694
TGME49_203665	hypothetical protein	N/A	4.15	4.56e-09	1.05e-08	4.48614	4.59299	5.07603	6.69594	8.91751	8.27709
TGME49_203682	hypothetical protein	N/A	8.19	2.76e-84	1.16e-82	4.48614	3.81513	4.83261	4.82137	12.168	12.3441
TGME49_203685	hypothetical protein	N/A	4.43	2.76e-45	2.45e-44	7.4641	7.80275	7.85443	8.18676	11.9698	12.165
TGME49_203688	hypothetical protein	N/A	3.63	1.54e-21	6.24e-21	8.6768	8.4388	8.26382	9.07265	12.2958	12.0686
TGME49_203690	AP2 domain transcription factor AP2VIIa-5	AP2VIIA5	-2.06	1.61e-08	3.6e-08	14.2077	14.2126	14.5818	15.318	12.3528	11.9067
TGME49_203700	SFT2 family protein	N/A	-1.74	0.149	0.185	4.81356	3.46704	4.61863	4.09112	2.48056	2.89782
TGME49_203710	AP2 domain transcription factor AP2VIIa-4	AP2VIIA4	2.81	0.000272	0.00046	3.93301	3.59264	4.45603	4.33997	6.32008	6.62747
TGME49_203720	vitamin k epoxide reductase family protein	N/A	0.61	0.101	0.129	15.9871	16.7518	16.0694	15.6922	16.8863	17.1568
TGME49_203730	hypothetical protein	N/A	5.91	3.72e-09	8.64e-09	0	3.17737	3.94503	2.89088	8.02568	8.04418
TGME49_203740	hypothetical protein	N/A	-0.51	0.399	0.45	7.0479	8.43461	7.78761	8.48688	7.36548	7.4263
TGME49_203750	hypothetical protein	N/A	6.8	5.62e-17	1.89e-16	1.94666	2.59194	1.8554	0	9.09586	8.48192
TGME49_203760	hypothetical protein	N/A	-0.9	0.0013	0.00207	9.79347	9.87873	9.69655	9.50093	8.99584	8.87957
TGME49_203770	hypothetical protein	N/A	2.96	0.000159	0.000274	3.93301	3.59264	3.94503	3.61237	6.7871	6.45249
TGME49_203780	hypothetical protein	N/A	0.2	0.497	0.548	11.0009	11.398	10.7894	10.5732	11.4557	11.3627
TGME49_203790	hypothetical protein	N/A	9.56	1.85e-49	1.91e-48	4.57522	2.81453	6.51316	7.78653	13.2253	13.4775
TGME49_203800	hypothetical protein	N/A	6.28	2.41e-13	6.88e-13	1.27942	2.81453	3.67619	2.53927	8.29249	8.262
TGME49_203810	kelch repeat-containing protein	N/A	-0.26	0.353	0.403	14.91	14.6357	15.7775	16.0062	14.3336	14.6775
TGME49_203815	hypothetical protein	N/A	1.25	0.256	0.302	3.45836	3.32946	3.94503	3.94849	4.88288	4.14325
TGME49_203820	hypothetical protein	N/A	3.61	1.31e-37	9.06e-37	7.9948	8.29375	8.58235	8.49973	11.6975	11.8149
TGME49_203830	FHA domain-containing protein	N/A	-5.98	1.43e-46	1.33e-45	17.0383	16.7016	16.6993	17.3136	11.2636	10.4093
TGME49_203840	DEAD/DEAH box helicase domain-containing protein	N/A	-2.87	3.54e-17	1.2e-16	11.6931	11.4668	10.7872	10.663	8.9944	8.36207
TGME49_203860	hypothetical protein	N/A	0.46	0.177	0.216	9.33581	9.1657	9.34226	8.82469	9.77981	9.63723
TGME49_203870	pre-mRNA-splicing factor ISY1, putative	N/A	3.8	5.22e-22	2.16e-21	9.3548	9.3899	8.71412	7.8481	12.9222	13.3835
TGME49_203880	hypothetical protein	N/A	5.13	9.59e-47	9.07e-46	8.65653	8.71571	9.70563	10.4951	13.8583	13.7716
TGME49_203890	hypothetical protein	N/A	0.2	0.601	0.645	11.8806	11.242	13.3288	13.9196	11.7249	11.8542
TGME49_203900	FAM184 domain-containing protein	N/A	-0.75	0.125	0.157	8.23928	7.81569	7.71755	8.52508	7.09706	7.47072
TGME49_203910	TBC domain-containing protein TBC10	TBC10	-1.93	5.79e-10	1.4e-09	14.0199	13.7472	13.5756	13.2196	12.1551	11.7454
TGME49_203930	hypothetical protein	N/A	2.36	4.62e-06	8.84e-06	6.91769	5.78958	8.83899	9.40859	8.81689	8.77895
TGME49_203940	ABC1 protein	N/A	4.41	3.37e-22	1.41e-21	5.54464	5.05251	5.46616	5.04816	9.85548	9.48098
TGME49_203950	Myb family DNA-binding domain-containing protein	N/A	-4.24	5.04e-27	2.47e-26	14.5507	14.2828	13.5246	14.4007	10.3589	9.9906
TGME49_203960	hypothetical protein	N/A	1.49	7.92e-08	1.7e-07	10.3008	10.2408	9.48089	9.1521	11.8567	11.6634
TGME49_203970	dolichyl-diphosphooligosaccharide--protein glycosyltransferase	N/A	1.64	0.0284	0.0388	6.28688	4.9623	5.87301	6.67344	7.75358	6.88545
TGME49_203980	hypothetical protein	N/A	0.15	0.637	0.68	11.0953	10.9885	10.0678	10.4075	11.433	10.9151
TGME49_203985	hypothetical protein	N/A	6.76	0.0276	0.0378	0	0	0	0	4.48405	4.77346
TGME49_203990	rhoptry protein ROP12	ROP12	2.75	2.39e-08	5.28e-08	6.33869	6.9625	8.72755	9.70328	9.53453	9.31673
TGME49_204000	hypothetical protein	N/A	-5.6	5.25e-89	2.64e-87	11.7348	11.6966	11.9609	11.676	6.05882	6.20156
TGME49_204010	hypothetical protein	N/A	-5.09	1.63e-98	1.26e-96	14.0472	14.1367	14.1031	14.2449	9.10522	8.90082
TGME49_204020	ribosomal protein RPL8	RPL8	0.57	0.275	0.323	8.76937	8.78643	8.5625	7.41833	8.93862	9.6633
TGME49_204040	hypothetical protein	N/A	-0.64	0.0194	0.0271	12.2631	12.2345	12.6455	12.8977	11.7677	11.4198
TGME49_204045	hypothetical protein	N/A	3.07	2.17e-08	4.8e-08	5.45359	4.65189	6.02578	6.42674	8.1316	8.12699
TGME49_204050	subtilisin SUB1	SUB1	5.57	5.88e-78	1.93e-76	10.1513	9.6737	10.2181	10.0365	15.5904	15.3926
TGME49_204060	syntaxin-12	STX12	0.72	0.00994	0.0143	11.5973	11.6106	11.6941	11.3549	12.4517	12.1803
TGME49_204070	YT521-B family protein	N/A	4.54	2.31e-56	3.03e-55	8.23928	8.19322	7.81303	7.37716	12.7803	12.722
TGME49_204080	histidine acid phosphatase superfamily protein	N/A	1.24	0.000548	0.000901	10.8384	10.3076	10.4518	10.3015	12.0787	11.5373
TGME49_204090	eIF2 kinase IF2K-C	N/A	0.16	0.893	0.913	5.13987	2.59194	5.18389	5.99023	4.97916	3.79764
TGME49_204100	eIF2 kinase IF2K-C	N/A	1.83	0.000179	0.000307	10.4496	10.0224	10.5918	11.8881	12.2193	11.9232
TGME49_204110	eIF2 kinase IF2K-C	N/A	2.6	4.65e-17	1.57e-16	7.73933	7.93907	6.92424	7.03286	10.5266	10.3505
TGME49_204120	pre-mRNA-splicing factor CWC25, putative	N/A	-1.61	3.03e-06	5.88e-06	12.639	12.4407	12.7517	12.0404	10.8861	10.9845
TGME49_204130	perforin-like protein PLP1	PLP1	4.59	1.52e-78	5.09e-77	11.3696	11.5644	11.5224	11.338	16.1159	15.9934
TGME49_204140	PHD-finger domain-containing protein	N/A	-3.77	5.44e-17	1.83e-16	12.4073	12.236	11.5466	12.047	9.0073	7.90869
TGME49_204160	GYF domain-containing protein	N/A	-2.45	5.01e-17	1.69e-16	10.8485	10.7732	9.69655	9.52312	8.51757	8.18945
TGME49_204270	dense granule protein GRA60	GRA60	-5.02	6.04e-61	9.59e-60	10.3251	10.3053	10.3884	10.6166	5.40021	5.2519
TGME49_204280	cell-cycle-associated protein kinase DYRK1	DYRK1	-0.29	0.362	0.412	11.1838	10.9024	10.2307	10.4594	10.962	10.5291
TGME49_204290	hypothetical protein	N/A	0.59	0.304	0.352	6.36391	7.22748	6.51316	7.10189	7.24478	7.62409
TGME49_204300	hypothetical protein	N/A	1.5	0.0832	0.107	5.01805	5.00811	2.91577	4.73709	6.4931	6.4701
TGME49_204310	hypothetical protein	N/A	-3.37	1.02e-21	4.16e-21	14.641	14.3302	13.842	14.0676	11.4317	10.7311
TGME49_204320	hypothetical protein	N/A	4.6	1.34e-14	4.05e-14	6.28688	5.68063	6.26561	7.88773	10.4594	10.7053
TGME49_204325	hypothetical protein	N/A	0.54	0.287	0.335	6.8117	6.23708	6.75968	6.65058	6.95631	7.20756
TGME49_204330	hypothetical protein	N/A	-4.95	2.41e-16	7.88e-16	7.62923	7.57057	7.83801	7.1996	3.11024	2.54591
TGME49_204340	dense granule protein GRA54	GRA54	6.66	2.38e-45	2.12e-44	7.69032	8.74644	8.44817	9.30263	14.9625	14.9754
TGME49_204350	GTP-binding protein, putative	N/A	-0.23	0.569	0.615	9.61852	9.29145	10.4786	11.2476	9.41161	9.03258
TGME49_204360	subtilisin SUB4	SUB4	1.26	0.00027	0.000456	11.1352	11.2775	10.6352	9.92661	12.3804	12.5416
TGME49_204370	mitochondrial pyruvate carrier protein 2	MPC2	-2.96	7.48e-13	2.09e-12	9.59475	10.113	9.7169	9.2655	6.64023	7.17034
TGME49_204380	hypothetical protein	N/A	-4.95	4.06e-42	3.31e-41	12.6678	12.4196	11.3097	11.8924	7.83945	7.33796
TGME49_204390	hypothetical protein	N/A	1.26	5.23e-05	9.33e-05	8.70668	8.39636	8.26995	8.17879	9.76638	9.86977
TGME49_204395	hypothetical protein	N/A	0.95	0.0271	0.0372	10.0789	9.44299	9.81662	9.00669	10.6349	10.838
TGME49_204400	ATPase synthase subunit alpha, putative	N/A	1.92	8.03e-11	2.03e-10	10.3203	10.6064	9.89012	9.52312	12.3013	12.4668
TGME49_204410	endonuclease/exonuclease/phosphatase family protein	N/A	3.26	5.72e-17	1.92e-16	7.47572	7.43459	6.28995	6.06127	11.0038	10.3337
TGME49_204420	oocyst wall protein OWP1	OWP1	0.08	0.922	0.937	12.487	9.45751	14.9023	16.1487	11.7894	11.6748
TGME49_204440	cyclic nucleotide-binding domain-containing protein	N/A	2.58	5.27e-12	1.41e-11	7.55451	7.93315	7.86257	8.41411	10.4266	10.2374
TGME49_204460	hydroxymethylglutaryl-CoA lyase, putative	N/A	0.45	0.19	0.231	13.4365	13.899	13.424	12.9407	13.9432	14.3079
TGME49_204480	thioredoxin domain-containing protein	N/A	-3.12	3.76e-33	2.23e-32	15.6747	15.4866	15.7907	15.4672	12.5011	12.4316
TGME49_204490	hypothetical protein	N/A	-0.7	0.0541	0.0717	13.3299	13.2073	13.7067	13.0086	12.3195	12.7823
TGME49_204500	hypothetical protein	N/A	4.68	8.84e-21	3.46e-20	4.57522	5.43444	5.70214	5.30391	9.48723	9.92747
TGME49_204505	hypothetical protein	N/A	-1.02	0.629	0.672	2.40114	2.81453	5.07603	2.89088	2.60648	0
TGME49_204510	WD domain, G-beta repeat-containing protein	N/A	-4.42	2.37e-82	9.46e-81	15.7344	15.7631	16.0297	16.1813	11.4068	11.2499
TGME49_204520	hypothetical protein	N/A	1.56	0.0564	0.0745	13.968	11.0541	16.1623	17.6058	14.7177	14.6985
TGME49_204530	microneme protein MIC11	MIC11	9.18	6.26e-38	4.39e-37	9.18476	7.48406	10.0801	12.0132	17.5657	17.9077
TGME49_204540	DUF367 domain-containing protein	N/A	-0.38	0.34	0.389	9.41033	9.79136	9.27373	8.855	8.90071	9.50574
TGME49_204550	hypothetical protein	N/A	-2.28	6.68e-25	3.04e-24	12.5242	12.5526	12.5868	12.5819	10.2316	10.296
TGME49_204560	type I fatty acid synthase, putative	N/A	-4.73	1.02e-93	6.19e-92	13.8183	13.7666	13.4513	13.3103	9.11717	9.01319
TGME49_204870	thrombospondin type 1 domain-containing protein	N/A	2.02	8.47e-05	0.000149	8.23245	9.37905	8.74527	9.24276	10.5415	11.2436
TGME49_204880	hypothetical protein	N/A	1.61	0.00785	0.0115	6.3887	5.78958	6.51316	7.64338	7.61437	7.80496
TGME49_205000	phosphoglycerate mutase family protein	N/A	-1.97	4.15e-09	9.62e-09	12.6153	12.6675	13.2488	13.9264	10.5741	10.7721
TGME49_205010	splicing factor 3B subunit 1, putative	N/A	4.13	1.24e-22	5.24e-22	8.05023	8.76657	8.20742	9.02013	12.5847	12.5807
TGME49_205020	hypothetical protein	N/A	1.01	0.402	0.453	11.7336	8.29375	14.1023	14.9898	11.9506	11.7787
TGME49_205030	protein transport protein BET1, putative	N/A	1.95	9.53e-12	2.53e-11	10.9878	11.192	11.2902	11.3064	12.8128	13.2343
TGME49_205040	PGAP1 family protein	N/A	1.33	0.00275	0.00424	9.18476	9.30757	9.06388	10.0605	10.7948	10.3223
TGME49_205050	hypothetical protein	N/A	-4.48	8.99e-20	3.4e-19	13.7101	13.2809	12.8481	11.7935	9.40296	8.52888
TGME49_205060	hypothetical protein	N/A	7.85	5.71e-46	5.18e-45	3.25768	3.32946	4.61863	3.40951	10.895	11.0947
TGME49_205070	hypothetical protein	N/A	-5.83	1.98e-69	4.6e-68	14.3634	14.621	15.4572	16.0886	8.59557	8.73957
TGME49_205080	hypothetical protein	N/A	-6.77	3.2e-27	1.58e-26	9.33581	9.5952	10.0322	8.69107	3.19287	2.54591
TGME49_205090	Toxoplasma gondii family D protein	N/A	-2.21	1.5e-09	3.57e-09	15.8488	15.3937	17.0137	17.7256	13.5227	13.3357
TGME49_205100	hypothetical protein	N/A	4.61	5.09e-05	9.08e-05	5.99562	1.00419	6.1639	6.42674	9.76891	9.38909
TGME49_205120	hypothetical protein	N/A	5.39	1.85e-05	3.41e-05	3.45836	0	1.8554	3.17338	7.96232	7.23357
TGME49_205140	hypothetical protein	N/A	1.18	0.0179	0.025	7.45239	7.9567	9.24288	10.3783	8.84431	8.95654
TGME49_205150	ACR, YagE family COG1723 domain-containing protein	N/A	-5.32	1.89e-45	1.69e-44	11.7923	11.825	11.4866	11.4622	6.87105	5.99812
TGME49_205160	zinc finger CCHC domain-containing protein	N/A	-2.62	1.42e-19	5.32e-19	12.3134	12.3263	11.6294	11.664	9.92133	9.44693
TGME49_205170	hypothetical protein	N/A	1.4	0.00588	0.0087	6.77456	7.06359	6.44975	5.61851	8.1158	8.50559
TGME49_205180	RNA recognition motif-containing protein	N/A	-2.17	2.74e-06	5.32e-06	12.0963	12.4154	11.8613	10.8651	9.69286	10.4155
TGME49_205190	hypothetical protein	N/A	-0.43	0.549	0.597	7.0787	8.33477	6.81105	8.38671	7.50542	7.3235
TGME49_205200	hypothetical protein	N/A	2.06	1.42e-06	2.81e-06	5.78768	5.68063	7.77904	7.86805	7.87116	7.67053
TGME49_205210	hypothetical protein	N/A	-4.44	2.85e-52	3.21e-51	14.8698	14.7413	15.6271	16.0921	10.2588	10.4707
TGME49_205220	U5 snRNP-associated subunit, putative	N/A	-1.88	4.35e-11	1.11e-10	13.9425	13.7727	14.0854	14.5468	12.0077	11.9464
TGME49_205230	hypothetical protein	N/A	-0.68	0.139	0.173	6.59449	6.23708	8.60192	8.82469	5.51707	5.96124
TGME49_205240	cleft lip and palate transmembrane protein 1 (clptm1) protein	N/A	0.58	0.0873	0.112	10.9172	10.5172	10.6576	10.1589	11.4043	11.2
TGME49_205250	rhoptry protein ROP18	ROP18	4.34	6.31e-11	1.6e-10	8.87841	7.03067	10.7328	12.0869	12.5254	12.6046
TGME49_205265	transporter, cation channel family protein	N/A	-0.58	0.365	0.415	8.52295	7.18822	8.16856	7.70014	6.86476	7.82221
TGME49_205280	hypothetical protein	N/A	-0.56	0.0304	0.0414	15.6456	15.5805	16.2085	16.0286	14.8783	15.207
TGME49_205290	glucan phosphatase Laforin	N/A	-1.52	1.67e-10	4.15e-10	14.913	15.0227	14.6849	14.4579	13.4048	13.4901
TGME49_205300	hypothetical protein	N/A	1.17	0.00102	0.00163	9.45209	10.1351	9.24288	9.30629	11.1033	10.892
TGME49_205320	hypothetical protein	N/A	-0.29	0.294	0.342	13.7838	13.7961	14.4958	14.8589	13.3762	13.6206
TGME49_205330	hypothetical protein	N/A	7	7.16e-110	8.04e-108	7.25082	7.23713	8.47496	8.99313	14.1395	14.3309
TGME49_205340	ribosomal protein RPS12	RPS12	-1.43	0.000193	0.00033	12.3821	12.8452	12.5683	12.5394	10.7422	11.5466
TGME49_205350	integral membrane protein, GNS1/SUR4 family protein, putative	N/A	-0.67	0.00906	0.0131	13.5666	13.7019	14.62	14.8685	13.0734	12.8459
TGME49_205360	hypothetical protein	N/A	1.18	0.0766	0.0991	9.05527	7.2657	9.81662	10.875	9.89535	9.23024
TGME49_205370	hypothetical protein	N/A	-0.45	0.287	0.335	8.77408	8.91524	8.70056	7.95457	8.55515	8.22618
TGME49_205380	fructose-1,6-bisphosphatase 1	FBP1	-2.04	2.78e-11	7.2e-11	10.3458	10.4544	10.9189	10.6268	8.18051	8.53308
TGME49_205390	hypothetical protein	N/A	10.15	9.47e-46	8.56e-45	4.18022	3.70817	4.27274	6.62736	13.7237	14.2431
TGME49_205398	DNA repair and recombination protein RAD54, putative	N/A	-6.24	2.43e-67	5.16e-66	14.8387	15.363	15.6811	16.1407	9.09317	8.63612
TGME49_205402	SNF2 family N-terminal domain-containing protein	N/A	-5.98	1.85e-56	2.43e-55	14.5476	14.5969	15.3245	16.2229	8.66777	8.52046
TGME49_205410	RNA pseudouridine synthase superfamily protein	N/A	2.19	2.04e-06	3.99e-06	7.81444	6.84119	8.05951	8.13829	9.40945	9.74422
TGME49_205420	aspartate-semialdehyde dehydrogenase	N/A	-5.4	5.32e-75	1.57e-73	12.7783	12.6423	13.2186	13.0912	7.5374	7.05839
TGME49_205425	hypothetical protein	N/A	1.93	0.21	0.253	2.40114	1.59055	3.14658	2.89088	3.60862	3.74074
TGME49_205430	isovaleryl-CoA dehydrogenase	N/A	-2.07	6.44e-11	1.64e-10	11.668	12.2342	11.921	12.1153	9.92738	9.90256
TGME49_205440	CCT chaperonin gamma subunit	N/A	-1.89	4.08e-06	7.83e-06	12.8033	12.5238	12.3231	11.311	10.7777	10.7756
TGME49_205450	hypothetical protein	N/A	-5.83	3.88e-162	1.99e-159	15.1749	15.1622	15.5925	15.6555	9.3488	9.32401
TGME49_205460	AN1 family Zinc finger domain-containing protein	N/A	-1.44	2.87e-07	5.97e-07	12.7792	12.9788	13.2111	13.2832	11.2291	11.6351
TGME49_205470	translation elongation factor 2 family protein, putative	N/A	5.26	1.15e-107	1.21e-105	8.48322	8.56294	8.35317	8.30856	13.7473	13.809
TGME49_205480	IMC subcompartment protein ISP4	ISP4	7.41	3.88e-06	7.45e-06	1.94666	0	1.8554	5.79563	7.58789	7.95319
TGME49_205490	integral membrane protein, putative	N/A	14.47	6.18e-24	2.73e-23	1.27942	0	6.82777	7.59632	13.8545	13.5752
TGME49_205500	U3 small nucleolar RNA-associated protein 14, putative	UTP14	9	1.12e-14	3.41e-14	1.94666	0	0	2.53927	9.20938	9.35751
TGME49_205510	nucleolar protein 5, putative	N/A	7.38	1.82e-65	3.57e-64	4.18022	4.86606	4.95945	4.33997	11.7639	12.0335
TGME49_205520	apicomplexan amino acid transporter ApiAT5-2	ApiAT5-2	-6.06	4.34e-52	4.88e-51	19.4909	19.1215	19.3762	19.55	13.6529	12.7134
TGME49_205530	hypothetical protein	N/A	-0.85	0.142	0.176	6.8479	6.19808	6.33744	6.55536	5.68349	5.74684
TGME49_205540	DEAD/DEAH box helicase domain-containing protein	N/A	3.63	1.17e-09	2.78e-09	5.99562	7.12725	7.01466	8.28649	10.4452	10.1182
TGME49_205550	AGC kinase	N/A	1.64	0.00122	0.00194	8.46001	8.25627	7.69949	8.84999	10.2695	9.65754
TGME49_205558	NAC domain-containing protein	N/A	-1.43	1.84e-07	3.88e-07	13.2499	13.4012	13.4503	13.2179	11.7134	12.0539
TGME49_205562	hypothetical protein	N/A	-1.59	3.02e-06	5.86e-06	11.7402	11.5132	10.408	10.933	10.223	9.83791
TGME49_205570	sorting assembly machinery subunit SAM50	SAM50	-3.1	1.53e-25	7.13e-25	12.9222	12.7235	12.882	13.371	9.70435	9.74422
TGME49_205580	nuclear factor NF4	N/A	6.84	1.73e-47	1.68e-46	5.86037	4.76295	4.76475	5.04816	11.916	12.4358
TGME49_205590	centrosomal protein CEP131	CEP131	-2.54	9.98e-11	2.51e-10	8.46585	8.14277	8.41535	8.53135	5.65462	5.9234
TGME49_205600	zinc finger, C3HC4 type (RING finger) domain-containing protein	N/A	-1.43	3.01e-10	7.4e-10	12.5471	12.443	12.3519	12.2625	11.0905	11.0394
TGME49_205615	hypothetical protein	N/A	-0.9	0.132	0.164	8.24608	8.45543	6.63219	7.58431	7.90832	6.79752
TGME49_205625	transporter, major facilitator family protein	N/A	-0.29	0.468	0.518	11.7617	11.2722	11.1002	10.4983	11.5078	10.9307
TGME49_205630	hypothetical protein	N/A	1.61	0.455	0.506	1.27942	1.00419	3.14658	2.07335	2.01938	2.40654
TGME49_205640	hypothetical protein	N/A	-6.58	5.92e-51	6.45e-50	14.8832	14.5709	14.6806	15.1584	8.59557	7.53905
TGME49_205650	AP2 domain transcription factor AP2VIIa-3	AP2VIIA3	2.95	0.11	0.139	7.20968	1.00419	8.65443	9.50093	9.31346	8.98591
TGME49_205658	F5/8 type C domain-containing protein	N/A	-5.68	2.71e-48	2.7e-47	16.4477	16.337	17.2851	18.2245	10.5947	10.8299
TGME49_205662	LCCL domain-containing protein	N/A	-5.96	4.07e-63	7.18e-62	13.1083	12.8381	14.1853	14.905	6.96809	7.08149
TGME49_205670	striated fiber assemblin SFA2	SFA2	-3.03	3.73e-42	3.04e-41	14.7348	14.8757	15.3755	15.3307	11.8182	11.7384
TGME49_205680	hypothetical protein	N/A	4.42	4.2e-19	1.55e-18	4.57522	4.76295	3.14658	3.61237	9.14208	8.94242
TGME49_205690	hypothetical protein	N/A	-3.09	1.03e-37	7.2e-37	13.2138	13.4154	13.6871	13.5373	10.2019	10.2591
TGME49_205700	cyclophilin precursor	N/A	7.38	3.79e-56	4.93e-55	4.65912	6.00824	5.33191	5.57062	12.7796	12.9314
TGME49_205710	lysine-tRNA ligase	N/A	-2	0.00199	0.0031	7.0479	6.45122	6.8928	6.06127	4.80621	4.8291
TGME49_205720	Adenosine/AMP deaminase domain-containing protein	N/A	-2.06	4.35e-10	1.06e-09	10.1349	10.0932	10.2386	10.2473	7.75358	8.30679
TGME49_205730	hypothetical protein	N/A	4.62	8.48e-36	5.55e-35	7.60827	7.08512	8.57741	9.14394	11.8925	12.0603
TGME49_205740	ER membrane protein complex subunit 1, putative	EMC1	-3.63	1.83e-34	1.13e-33	13.8712	13.6674	13.8311	13.8354	10.3706	9.86728
TGME49_205750	histone deacetylase complex subunit Sin3	SIN3	1.81	2.07e-10	5.12e-10	9.65474	9.52603	9.81452	9.52312	11.284	11.5136
TGME49_205760	membrane protein	N/A	-6.04	2.45e-63	4.38e-62	16.552	16.6686	17.4315	18.2467	10.651	10.48
TGME49_205770	hypothetical protein	N/A	3.84	0.424	0.475	0	0	0	0	1.82582	2.25225
TGME49_206290	hypothetical protein	N/A	1.9	0.122	0.153	3.0245	2.59194	3.14658	3.7902	4.85778	4.1865
TGME49_206300	hypothetical protein	N/A	8.71	2.2e-06	4.31e-06	1.27942	0	0	4.09112	7.58024	8.34308
TGME49_206310	prenyltransferase, UbiA family protein	N/A	6.75	1.15e-33	7e-33	2.74623	3.81513	3.94503	4.55215	10.0208	10.0606
TGME49_206320	hypothetical protein	N/A	-5.08	1.68e-91	9.05e-90	14.9608	14.8061	15.4052	15.4689	9.94089	9.65946
TGME49_206330	PHD-finger domain-containing protein	N/A	0.68	0.0863	0.111	11.1046	11.3698	10.0922	9.16021	11.9672	11.8779
TGME49_206340	hypothetical protein	N/A	2.82	1.72e-24	7.72e-24	10.9633	11.1814	11.5617	11.3101	13.749	14.0312
TGME49_206350	ER-retrevial receptor Ter1p, putative	N/A	3.53	3.4e-49	3.48e-48	10.8305	10.8093	10.3969	10.4395	14.2267	14.4612
TGME49_206360	peptidyl-tRNA hydrolase domain-containing protein	N/A	0.23	0.658	0.699	8.27295	9.33254	8.61643	9.38109	9.28666	8.94871
TGME49_206380	hypothetical protein	N/A	-1.86	8.73e-11	2.2e-10	13.9156	13.9599	14.0254	14.1514	12.2984	11.8151
TGME49_206390	checkpoint protein HUS1, putative	N/A	-3.11	6.93e-46	6.27e-45	14.7777	14.8751	14.9419	14.9143	11.671	11.7612
TGME49_206400	FAD binding domain of DNA photolyase domain-containing protein	N/A	-0.78	0.000884	0.00142	15.3553	15.5962	15.9921	15.9229	14.6825	14.717
TGME49_206415	myosin K	MyoK	0.01	0.98	0.986	10.9581	10.7774	9.75237	9.28047	11.2131	10.447
TGME49_206430	formin FRM1	FRM1	1.03	0.0724	0.094	8.95094	7.53971	9.50448	9.83582	9.79228	8.97362
TGME49_206440	cpw-wpc domain-containing protein	N/A	-3.72	1.94e-23	8.43e-23	13.5084	14.0017	14.5715	15.2816	9.9565	10.1602
TGME49_206450	autophagy-related cysteine peptidase atg4, putative	N/A	-2.83	1.75e-12	4.8e-12	14.4188	14.1103	13.612	13.3032	11.8353	10.9131
TGME49_206460	hypothetical protein	N/A	-0.52	0.0363	0.0491	12.3639	12.1679	12.3064	12.1438	11.8055	11.6993
TGME49_206470	pyruvate dehydrogenase complex subunit PDH-E3II	PDHE3II	2.29	4.01e-25	1.84e-24	11.0667	10.9971	11.1903	11.1794	13.3236	13.3127
TGME49_206480	succinate dehydrogenase subunit SDH23	SDH23	-1.43	0.00018	0.00031	11.9463	12.1447	11.7948	10.9518	10.7383	10.494
TGME49_206490	metacaspase MCA1	MCA1	0.98	0.0754	0.0977	5.92958	6.27505	5.9666	6.3719	7.26879	6.87226
TGME49_206500	hypothetical protein	N/A	4.86	2.98e-26	1.42e-25	5.40581	5.2176	4.17156	3.17338	10.3347	9.8985
TGME49_206510	toxolysin TLN4	TLN4	9.48	1.82e-35	1.18e-34	4.65912	3.00733	5.58897	7.65491	13.6674	13.1005
TGME49_206520	hypothetical protein	N/A	4.02	0.402	0.453	0	0	0	0	2.92926	0.620822
TGME49_206540	hypothetical protein	N/A	8.71	1.15e-62	1.98e-61	3.25768	3.59264	2.91577	2.89088	12.2799	11.7238
TGME49_206550	hypothetical protein	N/A	0.57	0.249	0.294	9.76061	10.6101	9.33057	10.3713	10.6483	10.9715
TGME49_206560	EF hand domain-containing protein	N/A	6.1	8.41e-48	8.22e-47	4.88499	4.53157	3.81687	4.2209	10.6308	10.869
TGME49_206570	kinesin, putative	N/A	-4.52	2.11e-49	2.17e-48	16.1284	15.587	16.2284	16.0266	11.4309	11.2824
TGME49_206580	formin FRM2	FRM2	4.07	8.41e-17	2.81e-16	6.46061	6.38331	4.17156	5.36134	10.7664	10.1217
TGME49_206590	calcium-dependent protein kinase CDPK2A	CDPK2A	7.15	1e-84	4.26e-83	6.57302	6.53184	6.59359	7.39101	13.7851	13.5872
TGME49_206600	sigma-70, region 3 protein	N/A	5.35	1.4e-08	3.14e-08	1.27942	3.59264	2.91577	4.33997	8.20809	7.91191
TGME49_206610	pyruvate dehydrogenase complex subunit PDH-E2	PDHE2	-0.89	0.09	0.115	9.2437	8.95964	8.5625	7.30581	8.06186	8.37147
TGME49_206620	OST-HTH domain-containing protein	N/A	-1.42	5.72e-06	1.09e-05	9.45796	9.72089	8.90746	8.86496	8.28309	8.0588
TGME49_206630	hypothetical protein	N/A	7.3	3.04e-68	6.59e-67	5.78768	4.91498	6.05448	6.57976	12.5515	12.7555
TGME49_206640	hypothetical protein	N/A	3.3	2.25e-26	1.08e-25	8.09611	7.9272	8.2138	8.61046	11.3877	11.2242
TGME49_206650	zinc finger, c2h2 type domain-containing protein	N/A	1.1	0.328	0.377	3.25768	3.00733	4.36729	5.79563	4.38209	3.85238
TGME49_206660	hypothetical protein	N/A	-5.4	1.9e-91	1.01e-89	17.3387	17.3501	18.0651	18.058	12.141	11.7263
TGME49_206670	RNA recognition motif-containing protein	N/A	-2.24	2.4e-08	5.3e-08	13.3843	13.3272	13.2188	14.1594	11.2981	10.903
TGME49_206680	hypothetical protein	N/A	2.92	5.11e-11	1.31e-10	7.80526	7.11683	7.86257	7.15157	10.2588	10.5479
TGME49_206690	glideosome-associated protein with multiple-membrane spans GAPM2B	GAPM2B	5.75	6.49e-23	2.76e-22	6.65705	4.86606	8.12863	8.68546	11.6755	11.7989
TGME49_206700	hypothetical protein	N/A	-2.92	2.19e-11	5.69e-11	9.04751	9.82214	9.31879	9.64376	6.36532	6.77644
TGME49_206710	hypothetical protein	N/A	3.51	1.03e-17	3.59e-17	6.717	6.07434	6.05448	5.75334	9.9084	9.92587
TGME49_207005	SAG-related sequence SRS48Q	SRS48Q	-1.59	0.00965	0.0139	6.41307	6.54744	5.87301	5.91551	5.13357	4.68575
TGME49_207010	SAG-related sequence SRS48K	SRS48K	0.75	0.343	0.392	4.88499	4.00785	5.73797	5.75334	5.23455	5.2106
TGME49_207015	SRS domain-containing protein	N/A	0.31	0.764	0.796	3.63451	5.00811	4.69354	5.75334	4.34643	5.12426
TGME49_207020	hypothetical protein	N/A	7.75	6.86e-50	7.16e-49	3.63451	4.25586	3.67619	1.3809	11.4736	11.825
TGME49_207040	hypothetical protein	N/A	8.76	1.36e-49	1.41e-48	2.40114	3.32946	0	0	11.7662	11.3071
TGME49_207050	hypothetical protein	N/A	0	0.999	1	0	2.32863	2.30094	2.89088	2.01938	1.05346
TGME49_207060	ribonucleoside-diphosphate reductase small subunit	N/A	-2.57	4.9e-26	2.32e-25	16.2782	16.1633	16.0577	15.7873	13.6318	13.6816
TGME49_207065	hypothetical protein	N/A	0.2	0.578	0.623	9.02396	9.03349	9.0849	8.44764	9.19566	9.26596
TGME49_207070	UDP-N-acetylglucosamine transferase subunit ALG14, putative	N/A	0.36	0.383	0.433	8.80664	8.48002	8.05951	7.45836	9.17929	8.81385
TGME49_207080	histone lysine acetyltransferase MYST-B	MYSTB	0.72	0.00819	0.0119	10.5409	10.6984	9.93133	10.0387	11.4837	11.1884
TGME49_207100	hypothetical protein	N/A	-2.62	2.45e-12	6.7e-12	8.62035	8.66299	8.40424	8.70223	6.17517	5.88453
TGME49_207120	SUN-like protein SLP2	SLP2	0.12	0.71	0.748	10.7728	10.2622	10.5857	10.9611	10.7096	10.6147
TGME49_207140	SAG-related sequence SRS49B	SAG2X	-5.36	0.0115	0.0165	5.01805	3.59264	1.20743	3.7902	1.01295	0
TGME49_207150	SAG-related sequence SRS49C	SAG2D	-4.98	5.88e-35	3.73e-34	9.04361	9.44507	9.73917	9.35305	4.30988	4.38521
TGME49_207160	SAG-related sequence SRS49D	SAG2C	-4.83	1.39e-09	3.31e-09	7.22352	7.18822	7.07194	6.34368	3.19287	1.65581
TGME49_207170	cytochrome b-c1 complex subunit 12	QCR12	5.75	3.94e-37	2.69e-36	5.30524	6.33019	6.61302	6.02619	11.5847	11.7098
TGME49_207180	indole-3-glycerol phosphate synthase domain-containing protein	N/A	-0.33	0.419	0.47	8.44236	8.24675	7.82974	7.48445	8.24729	7.73749
TGME49_207200	hypothetical protein	N/A	0.6	0.295	0.343	7.47572	6.57814	6.63219	6.02619	7.89912	7.44868
TGME49_207210	hypothetical protein	N/A	-5.48	1.72e-11	4.49e-11	8.58861	10.4821	8.28214	10.3251	4.48405	4.3476
TGME49_207230	hypothetical protein	N/A	-3.8	2.85e-61	4.63e-60	14.4054	14.321	14.5375	14.3494	10.5717	10.5649
TGME49_207240	hypothetical protein	N/A	-5.37	1.94e-70	4.69e-69	14.2066	14.5635	14.4191	14.4543	9.23519	8.79126
TGME49_207250	electron-transfer-flavoprotein, alpha polypeptide	N/A	-5.68	1.74e-90	9.08e-89	17.1808	17.3858	17.463	17.5693	11.8078	11.3799
TGME49_207350	hypothetical protein	N/A	-2.64	0.000899	0.00145	6.86567	6.50013	6.40587	7.33477	3.19287	4.68575
TGME49_207370	golgi localizing protein GLP3	GLP3	1.24	1.58e-05	2.92e-05	11.2588	11.3393	11.4473	11.9183	12.5422	12.5362
TGME49_207390	AP-4 complex subunit mu, putative	N/A	0.11	0.746	0.779	11.5097	11.3932	11.2309	10.5898	11.5471	11.57
TGME49_207400	splicing factor Yju2, putative	N/A	0.65	0.0355	0.048	11.0706	11.0991	11.0414	10.618	11.5378	11.9158
TGME49_207403	hypothetical protein	N/A	8.05	0.000252	0.000427	0	0	0	0	5.97957	5.8035
TGME49_207420	hypothetical protein	N/A	1.51	0.00481	0.00719	9.68507	10.1594	9.95054	8.52508	11.1505	11.7033
TGME49_207430	ATP-dependent RNA helicase DDX1, putative	N/A	2	4.26e-13	1.21e-12	9.90077	9.61013	9.66898	9.46863	11.716	11.8026
TGME49_207440	ribosomal protein RPS4	RPS4	-4.49	3.02e-18	1.07e-17	9.0397	8.60081	8.58727	8.21039	4.80621	3.85238
TGME49_207450	RNA-splicing ligase RtcB, putative	N/A	-0.81	0.652	0.694	2.74623	4.65189	2.30094	0	3.60862	2.78978
TGME49_207460	ras-related protein RAB5B	RAB5B	1.23	0.0143	0.0202	12.149	11.9291	11.5673	10.1589	13.034	13.4722
TGME49_207590	protein phosphatase PPM12	PPM12	4.92	1.69e-07	3.56e-07	5.82448	2.32863	6.08262	7.11864	9.69109	9.9058
TGME49_207600	tubulin/FtsZ family, GTPase domain-containing protein	N/A	-1.19	0.0101	0.0146	7.94552	8.39636	7.41957	8.04498	7.13412	6.85896
TGME49_207610	rhoptry kinase family protein ROP36 (incomplete catalytic triad)	ROP36	0	0.997	1	5.19712	4.59299	5.84042	5.46977	5.40021	4.1865
TGME49_207620	pyridine nucleotide-disulfide oxidoreductase domain-containing protein	N/A	8.11	3.92e-20	1.5e-19	3.0245	0	2.91577	3.7902	9.51459	9.98525
TGME49_207630	peptidyl-tRNA hydrolase domain-containing protein	N/A	4.56	0.341	0.391	0	0	0	0	2.82948	2.40654
TGME49_207640	isoleucyl-tRNA synthetase family protein	N/A	7.22	2.33e-23	1.01e-22	2.40114	5.17806	3.81687	4.64758	11.6676	11.4457
TGME49_207650	OTU domain-containing protein OTUD1A	OTUD1A	-6.45	2.26e-104	2.13e-102	17.9236	18.181	18.9122	19.3597	11.4969	11.71
TGME49_207665	kinesin motor domain-containing protein	N/A	-2.72	6.27e-07	1.28e-06	8.36951	9.03902	8.40981	8.74061	5.40021	6.4875
TGME49_207680	suppressor of kinetochore protein 1	SKP1	4.69	1.45e-25	6.76e-25	6.55123	7.64495	6.40587	6.84431	11.8313	11.9465
TGME49_207690	programmed cell death 5 protein	PDCD5	-1.39	5.66e-08	1.22e-07	11.9915	12.2619	12.518	12.3999	10.675	10.8067
TGME49_207700	rhoptry kinase family protein ROP22 (incomplete catalytic triad)	ROP22	-1.21	0.0574	0.0757	6.4838	6.68071	7.04359	6.65058	4.83223	5.8035
TGME49_207710	phosphatidylinositol synthase	PIS	-0.4	0.0764	0.0988	12.6484	12.7405	13.0958	13.1968	12.2622	12.3317
TGME49_207720	Nrap domain-containing protein	N/A	1.42	0.000369	0.000617	10.0921	9.65041	9.56558	8.75139	11.2398	11.3609
TGME49_207730	hypothetical protein	N/A	-5.64	2.85e-56	3.72e-55	18.4182	18.0625	19.0973	19.1946	12.9402	12.1979
TGME49_207740	hypothetical protein	N/A	1.01	0.55	0.598	9.27727	3.46704	11.6815	12.6979	9.39534	9.21596
TGME49_207750	glycosyltransferase family 17 protein	N/A	2.27	1.58e-13	4.57e-13	8.60985	8.36149	8.42638	8.68546	10.646	10.8527
TGME49_207760	DnaJ C terminal region domain-containing protein	N/A	0.37	0.405	0.455	8.52853	8.16821	7.64391	6.92271	8.87904	8.5518
TGME49_207770	PCI domain-containing protein	N/A	4.03	8.33e-33	4.91e-32	7.75848	7.9092	7.4523	6.92271	11.6876	12.0102
TGME49_207780	hypothetical protein	N/A	-6.11	7.72e-62	1.29e-60	14.9409	15.3943	16.212	16.9385	9.00301	9.15467
TGME49_207790	enkurin, putative	N/A	1.88	0.000202	0.000345	6.26026	6.50013	6.98515	7.72223	7.99435	8.46884
TGME49_207800	hypothetical protein	N/A	1.74	5.86e-06	1.11e-05	9.31979	9.4962	9.31583	8.51878	11.012	11.2771
TGME49_207820	mitogen-activated protein kinase MAPK2	MAPK2	-1.51	3.65e-11	9.41e-11	13.7588	13.6905	13.8456	14.0195	12.1877	12.2437
TGME49_207830	MORN repeat-containing protein	N/A	0.1	0.683	0.722	12.5391	12.3424	13.4232	13.5561	12.4541	12.6299
TGME49_207840	ribosomal protein RPS17	RPS17	2.1	2.29e-09	5.38e-09	8.97978	8.79625	8.90352	8.73519	10.6515	11.256
TGME49_207900	transcription initiation factor TFIIIB	TFIIIB	2.93	4.26e-15	1.32e-14	9.19534	9.69486	9.7011	10.3887	12.368	12.421
TGME49_207910	calcium/proton exchanger CAX	CAX	1.28	0.000173	0.000297	9.76535	9.84599	10.0801	10.719	10.9962	11.1623
TGME49_207920	hypothetical protein	N/A	-2.73	1.46e-19	5.46e-19	10.2029	10.0376	9.94097	9.73893	7.26879	7.51804
TGME49_207930	phosphatidylethanolamine-binding protein	N/A	2.93	8.86e-16	2.83e-15	11.1669	11.6318	11.3193	10.7834	14.0995	14.568
TGME49_207940	ribosomal protein S9, putative	N/A	0.39	0.494	0.544	9.05139	8.45129	8.23276	6.78258	9.20067	9.1341
TGME49_207950	hypothetical protein	N/A	3.08	3.59e-16	1.17e-15	10.5965	11.0985	10.5955	9.86093	13.8548	14.0296
TGME49_207955	hypothetical protein	N/A	-5.07	2.03e-40	1.55e-39	12.6835	13.2393	14.0754	14.7418	7.77721	8.05297
TGME49_207960	vacuolar fusion protein CCZ1, putative	N/A	1.52	9.17e-09	2.08e-08	10.077	9.95965	9.60493	9.49131	11.6451	11.4136
TGME49_207965	FAD-dependent oxidoreductase, putative	N/A	-5.92	2.86e-59	4.17e-58	18.8581	18.4424	19.4051	19.6816	13.0571	12.3519
TGME49_207970	HEAT repeat-containing protein	N/A	-3.24	1.24e-16	4.11e-16	9.46381	9.08784	9.71914	9.29528	5.85823	6.25333
TGME49_207980	PIG-P protein	N/A	1.61	0.00128	0.00204	6.57302	6.21771	5.90489	6.25555	8.21799	7.74113
TGME49_207990	ribosomal RNA large subunit methyltransferase J protein	N/A	5.8	6.51e-30	3.49e-29	4.18022	5.59316	4.69354	4.64758	10.7898	10.8896
TGME49_208010	syntaxin-19	STX19	0.55	0.0396	0.0533	12.6195	13.0075	12.8581	12.8287	13.3092	13.4494
TGME49_208020	AP2 domain transcription factor AP2Ib-1	AP2IB1	0.6	0.482	0.532	5.3564	4.76295	3.52031	4.09112	5.27304	5.98594
TGME49_208030	microneme protein MIC4	MIC4	8.86	1.86e-81	7.2e-80	6.08933	6.63764	5.87301	7.10189	15.3297	15.1327
TGME49_208040	aldo-keto reductase	N/A	5.51	1.64e-13	4.75e-13	1.94666	3.32946	4.76475	5.30391	8.28544	8.01748
TGME49_208050	ABC transporter, putative	N/A	-0.15	0.885	0.906	4.3912	4.17783	3.52031	4.09112	4.30988	3.95599
TGME49_208070	inositol polyphosphate kinase	N/A	-0.98	0.0151	0.0213	10.1906	10.1376	8.71861	8.64556	9.55323	8.68971
TGME49_208090	5-formyltetrahydrofolate cyclo-ligase	N/A	-1.11	0.00373	0.00564	9.61064	9.82214	9.24911	8.60453	8.75534	8.46445
TGME49_208200	PHD-finger domain-containing protein	N/A	3.22	5.04e-18	1.77e-17	8.23245	8.94204	7.77904	7.51007	11.7086	11.9775
TGME49_208300	hypothetical protein	N/A	1.48	0.00289	0.00443	6.33869	6.40059	6.42797	7.06779	7.98858	7.67053
TGME49_208310	FHA domain-containing protein	N/A	1.41	6.27e-05	0.000111	10.1675	9.98278	9.44881	8.82979	11.3036	11.6516
TGME49_208320	polynucleotide kinase 3 phosphatase	N/A	1.27	0.0173	0.0242	8.62035	9.91675	9.31583	10.1529	10.6103	10.7493
TGME49_208330	DUF2981 domain-containing protein	N/A	-6.28	2.11e-108	2.25e-106	15.799	16.2646	16.4926	16.4809	9.84753	9.6964
TGME49_208340	PH domain-containing protein	N/A	1.41	3.33e-06	6.44e-06	9.73184	9.71053	10.3884	10.8601	11.206	11.0544
TGME49_208350	RNA-binding protein, putative	N/A	-1.4	7.79e-07	1.57e-06	13.9357	13.7969	14.6657	14.7397	12.2175	12.6797
TGME49_208360	hypothetical protein	N/A	1.18	0.000714	0.00116	9.80272	9.31897	9.4569	9.00669	10.8303	10.6876
TGME49_208370	dense granule protein GRA46	GRA46	7.99	6.73e-95	4.31e-93	7.26428	7.49214	8.0309	8.87978	15.2019	15.5142
TGME49_208380	hypothetical protein	N/A	2.79	0.000741	0.0012	9.24709	6.21771	11.7609	12.9893	11.1998	11.1954
TGME49_208390	F-actin-capping protein subunit alpha, putative	N/A	2.64	0.00224	0.00347	6.3887	3.70817	7.88671	7.6777	8.59177	7.66672
TGME49_208400	hypothetical protein	N/A	6.57	8.69e-60	1.32e-58	5.30524	5.78958	6.13732	5.99023	12.3881	11.7917
TGME49_208410	transporter, putative	N/A	6.58	1.08e-06	2.17e-06	1.94666	1.59055	0	4.2209	7.72956	7.95319
TGME49_208420	signaling linker factor SLF	SLF	-2.2	1.71e-14	5.16e-14	15.2102	14.9575	15.2794	15.5372	13.0562	12.7001
TGME49_208430	serine proteinase inhibitor PI-2, putative	N/A	5.06	1.26e-28	6.48e-28	6.50663	5.86621	7.12703	6.28553	11.0422	11.4468
TGME49_208440	ATP synthase-associated protein	N/A	5.26	5.51e-38	3.87e-37	6.05876	5.53175	5.46616	5.75334	10.7802	11.2585
TGME49_208450	protease inhibitor PI2	PI2	11.25	1.54e-100	1.27e-98	6.82991	6.27505	9.78485	11.2448	17.656	17.942
TGME49_208490	GTP-binding protein, putative	N/A	0.48	0.255	0.301	10.4816	9.90772	9.32764	8.51878	10.588	10.8024
TGME49_208500	protein phosphatase PPM4	PPM4	4.34	8.04e-58	1.1e-56	8.90872	9.07175	8.31809	7.98229	13.2937	13.3726
TGME49_208510	hypothetical protein	N/A	-3.17	3.33e-11	8.59e-11	10.6653	10.4092	9.77626	10.9773	7.5175	7.23357
TGME49_208530	nicotinate phosphoribosyltransferase	N/A	-1.65	7.02e-10	1.69e-09	13.865	13.7738	14.1934	14.1225	12.354	11.9604
TGME49_208540	DEAD/DEAH box helicase domain-containing protein	N/A	1.44	0.0115	0.0164	8.92576	8.00834	7.49481	6.12898	9.95945	9.98907
TGME49_208550	hypothetical protein	N/A	16.3	4.97e-28	2.52e-27	0	0	1.8554	0	13.9643	14.2505
TGME49_208560	carrier superfamily protein	N/A	4.42	8.65e-19	3.14e-18	5.78768	4.70849	5.07603	5.24409	9.70699	9.72418
TGME49_208570	ubiquitin conjugating enzyme E2, putative	N/A	4.33	6.65e-09	1.52e-08	5.71113	3.17737	8.40981	8.30856	9.24006	9.16281
TGME49_208580	DNA ligase 1, putative	N/A	-3.31	1.15e-19	4.33e-19	11.2049	11.2408	10.7427	11.0169	8.23515	7.50101
TGME49_208590	vacuolar ATP synthase subunit 54kD, putative	N/A	3.74	1.68e-40	1.28e-39	9.08969	9.07713	8.46964	8.07961	12.738	12.8934
TGME49_208710	DNA/RNA non-specific endonuclease	N/A	0.19	0.9	0.918	6.31302	0	6.92424	8.30856	5.80668	5.14633
TGME49_208718	protein tyrosine phosphatase type IVA A, putative	N/A	-1.61	6.02e-08	1.3e-07	13.2136	13.1697	13.2881	13.7855	11.6835	11.4644
TGME49_208722	hypothetical protein	N/A	-2.17	7.58e-11	1.92e-10	11.4869	11.2978	11.3377	11.783	9.43195	8.98285
TGME49_208730	microneme adhesive repeat protein MCP4	MCP4	5.21	5.12e-10	1.24e-09	5.5881	5.81558	5.80707	8.95166	10.8523	10.9227
TGME49_208740	microneme adhesive repeat protein MCP3	MCP3	3.05	0.00378	0.00572	2.40114	2.32863	5.46616	4.73709	5.0694	5.2106
TGME49_208750	RWD domain-containing protein	N/A	-0.91	0.0225	0.0312	12.2744	12.5371	12.1102	11.1854	11.3852	11.6143
TGME49_208760	hypothetical protein	N/A	0.41	0.769	0.801	8.83397	4.59299	11.4172	12.5394	8.52755	8.07615
TGME49_208770	hypothetical protein	N/A	0.64	0.417	0.469	10.8042	8.02515	13.2405	14.4878	10.5365	10.7343
TGME49_208780	ubiquitin-conjugating enzyme subfamily protein	N/A	3.1	1.48e-12	4.09e-12	8.15509	8.83808	8.10824	7.26124	11.489	11.761
TGME49_208790	MC family transporter, putative	N/A	4.52	2.53e-34	1.56e-33	7.0787	7.81569	7.04359	7.36317	11.9912	12.0359
TGME49_208800	mediator complex subunit MED18	MED18	-0.72	0.0621	0.0816	11.6347	12.3599	11.9341	12.2459	11.0681	11.5432
TGME49_208810	peptidyl-prolyl cis-trans isomerase, putative	N/A	-5.6	1.38e-33	8.32e-33	15.5868	15.2288	15.1387	14.1906	10.1799	9.34086
TGME49_208820	1-deoxy-D-xylulose-5-phosphate synthase	N/A	-1.56	0.00333	0.00508	10.7562	11.881	11.0645	12.1164	9.65055	10.0525
TGME49_208830	dense granule protein GRA16	GRA16	9.7	9.96e-31	5.45e-30	0	2.32863	0	0	10.9998	10.8183
TGME49_208842	DEAD/DEAH box helicase domain-containing protein	N/A	5.12	0.00037	0.000618	2.74623	0	3.94503	2.07335	6.40918	6.68138
TGME49_208850	SAG-related sequence SRS11	SAG2B	0.26	0.524	0.573	7.30391	7.34817	8.08755	8.36581	7.37436	7.76629
TGME49_208910	hypothetical protein	N/A	2.89	0.00184	0.00288	4.88499	2.59194	6.4712	6.4534	7.33396	6.38911
TGME49_208970	RNA recognition motif-containing protein	N/A	-2.92	2.56e-34	1.58e-33	14.8923	15.1271	14.9418	15.0318	12.1424	12.0381
TGME49_208980	hypothetical protein	N/A	7.41	1.21e-21	4.91e-21	2.40114	3.00733	2.64086	4.82137	9.93415	9.95039
TGME49_208990	hypothetical protein	N/A	-2.8	1.33e-15	4.2e-15	11.3492	11.7053	11.5729	10.9796	8.85069	8.61451
TGME49_209000	HECT-domain (ubiquitin-transferase) domain-containing protein	N/A	-2.95	4.3e-19	1.58e-18	14.6675	14.3848	14.1838	14.7804	11.6955	11.4531
TGME49_209005	hypothetical protein	N/A	0.55	0.661	0.701	3.93301	4.70849	1.20743	3.40951	4.54823	5.18949
TGME49_209010	elongation factor TS protein	N/A	-1.17	3.13e-05	5.68e-05	10.4032	10.5999	10.6076	10.9031	9.34767	9.33486
TGME49_209020	hypothetical protein	N/A	0.76	0.0249	0.0343	10.4874	10.0555	10.4559	10.9611	11.1029	10.9895
TGME49_209030	actin ACT1	ACT1	2.85	1.44e-18	5.18e-18	14.7291	15.1817	15.3171	15.6857	17.6404	17.9933
TGME49_209050	Tyrosine kinase-like (TKL) protein	TKL5	8.11	2.02e-15	6.34e-15	2.40114	0	5.73797	6.57976	9.25336	8.68406
TGME49_209060	thrombospondin type 1 domain-containing protein	N/A	-0.15	0.857	0.881	5.08025	5.78958	5.37806	6.47957	5.63997	4.95949
TGME49_209070	hypothetical protein	N/A	-1.05	1.05e-05	1.97e-05	13.3474	13.4618	13.1333	13.2598	12.2639	12.4461
TGME49_209080	transport protein particle (trapp) component, bet3 protein	N/A	-1.32	1.53e-08	3.42e-08	13.0432	12.8739	12.7047	12.6331	11.5997	11.6895
TGME49_209090	proteasome maturation factor ump1 protein	N/A	0.14	0.72	0.756	10.4569	10.405	9.84975	8.95166	10.6178	10.5244
TGME49_209095	hypothetical protein	N/A	-0.22	0.822	0.849	4.3912	5.09559	3.81687	4.82137	4.75274	4.38521
TGME49_209100	PUB domain-containing protein	N/A	1.3	0.00125	0.00198	8.53965	7.93315	7.79614	7.33477	9.58321	9.53845
TGME49_209108	mRNA-decapping enzyme subunit 1, putative	N/A	1.32	1.97e-06	3.87e-06	9.04361	9.20803	7.69949	7.74398	10.4903	10.4127
TGME49_209120	PAT complex subunit Asterix, putative	N/A	2	8.53e-06	1.61e-05	6.59449	6.11677	6.21565	6.16168	8.28309	8.41757
TGME49_209130	regulator of chromosome condensation (RCC1) repeat-containing protein	N/A	-2.48	0.00709	0.0104	6.4838	6.19808	5.84042	6.73991	4.60968	2.67299
TGME49_209140	anti-silencing protein, ASF1 family protein	N/A	0.11	0.873	0.896	5.74991	6.6082	5.23493	6.28553	6.3742	6.34207
TGME49_209150	non-proton pumping type-II NADH dehydrogenase I	NDH2-I	1.76	1.13e-09	2.7e-09	10.4874	10.9509	10.5991	10.6885	12.5028	12.4867
TGME49_209160	myristoyl CoA:protein N-myristoyltransferase	NMT	-0.95	0.0011	0.00176	11.8244	11.8706	11.7922	11.3119	10.8973	10.9014
TGME49_209170	hypothetical protein	N/A	3.64	0.073	0.0948	5.30524	0	7.2685	8.855	7.97988	7.83585
TGME49_209180	PAN domain-containing protein	N/A	-4.51	2.57e-35	1.65e-34	11.8352	11.0724	11.6495	11.6322	6.95039	7.0467
TGME49_209190	ABC transporter transmembrane region domain-containing protein	N/A	5.57	1.97e-35	1.27e-34	5.96298	4.9623	5.80707	5.41657	11.1294	10.9937
TGME49_209200	hypothetical protein	N/A	-1.07	0.00545	0.00809	9.38284	8.891	10.0957	9.82565	8.31802	7.82563
TGME49_209210	KH domain-containing protein	N/A	-0.99	0.00457	0.00685	12.7926	12.7269	12.1068	12.8195	11.9113	11.6046
TGME49_209240	RNA methyltransferase	N/A	7.51	1.27e-09	3.02e-09	1.94666	0	2.64086	2.07335	7.65136	7.95632
TGME49_209250	hypothetical protein	N/A	3.04	5.86e-22	2.41e-21	9.8256	9.61938	10.0213	10.5174	12.8916	12.6341
TGME49_209260	cytochrome c oxidase subunit COX5b	COX5b	0.76	0.0656	0.0859	9.87906	10.4922	9.93326	10.12	10.5498	11.3077
TGME49_209270	zinc finger (CCCH type) motif-containing protein	N/A	-1.21	0.00891	0.0129	10.1923	9.34151	8.72309	8.52508	8.91751	8.23393
TGME49_209280	FAM76 domain-containing protein	N/A	-0.26	0.476	0.527	11.2797	11.2716	10.9641	11.6604	11.2174	10.7778
TGME49_209290	ribosomal protein RPS28	RPS28	1.15	0.000295	0.000497	12.021	12.4034	12.0162	11.7417	13.1497	13.567
TGME49_209300	WD domain, G-beta repeat-containing protein	N/A	2.95	2.84e-12	7.72e-12	8.10361	9.06635	7.87871	8.23365	11.692	11.5305
TGME49_209420	hypothetical protein	N/A	0.82	0.0303	0.0413	12.1467	12.3064	11.7179	10.9139	12.8372	13.2374
TGME49_209430	40S ribosomal protein S4, putative	N/A	1.18	0.0755	0.0978	8.19077	8.14789	8.24526	6.22493	9.12245	9.54158
TGME49_209440	hypothetical protein	N/A	-3.13	3.4e-17	1.16e-16	13.2695	13.1268	12.7754	13.3479	10.3595	9.71775
TGME49_209450	TLD protein	N/A	-1.83	1.57e-09	3.73e-09	14.8014	14.6947	14.7982	15.2886	13.0589	12.7699
TGME49_209460	hypothetical protein	N/A	-1.14	0.00162	0.00255	10.391	10.6826	10.8158	10.2067	9.24249	9.55608
TGME49_209470	hypothetical protein	N/A	-6.04	9.79e-94	5.99e-92	19.8738	19.9957	20.3392	20.2343	14.13	13.6071
TGME49_209490	hypothetical protein	N/A	2.01	6.05e-07	1.23e-06	11.0773	11.9179	11.5172	11.9538	13.3661	13.7506
TGME49_209500	hypothetical protein	N/A	0.76	0.0384	0.0518	10.7845	10.6027	10.4612	9.83328	11.6737	11.1977
TGME49_209510	hypothetical protein	N/A	-2.16	3.2e-05	5.8e-05	10.2476	11.3807	10.4205	11.2963	8.53944	8.96277
TGME49_209515	hypothetical protein	N/A	-5.25	1.9e-33	1.14e-32	10.215	10.0905	11.0645	10.6239	5.34707	4.38521
TGME49_209520	WD domain, G-beta repeat-containing protein	N/A	2.12	5.48e-09	1.26e-08	9.23689	9.13764	9.21773	9.59372	11.5906	10.9516
TGME49_209530	hypothetical protein	N/A	-0.56	0.0569	0.0752	10.7152	10.5553	10.9228	10.6828	9.89997	10.2381
TGME49_209540	hypothetical protein	N/A	-1.53	6e-06	1.14e-05	9.99459	9.69311	10.3058	10.3269	8.55319	8.05297
TGME49_209550	hypothetical protein	N/A	1.09	0.00038	0.000633	8.89581	9.07175	8.95391	8.95166	10.2419	9.89687
TGME49_209560	hypothetical protein	N/A	-2.93	9.86e-16	3.13e-15	11.0406	11.1726	12.0433	11.5735	8.4645	7.83245
TGME49_209570	suppressor of mitotic defects protein	XPMC2	2.16	1.45e-08	3.25e-08	7.57626	8.25152	8.08059	8.32309	10.1026	10.1126
TGME49_209580	RNA methylase family UPF0020 protein	N/A	4.68	1.78e-38	1.27e-37	6.91769	6.91519	7.65332	8.33747	11.5375	11.6359
TGME49_209583	hypothetical protein	N/A	-5.02	2.28e-50	2.42e-49	13.8839	14.3333	14.8947	15.4513	9.06053	9.15331
TGME49_209585	hypothetical protein	N/A	-5.31	2.62e-66	5.33e-65	13.8529	13.8377	14.7505	15.1428	8.29716	8.74681
TGME49_209590	hypothetical protein	N/A	-6.32	1.23e-100	1.03e-98	15.1469	14.9771	15.8886	16.2787	8.91143	8.57233
TGME49_209600	hypothetical protein	N/A	3.99	7.64e-26	3.58e-25	9.45209	9.86479	9.03896	8.24132	13.5525	13.76
TGME49_209610	oocyst wall protein OWP2	OWP2	-5.59	6.4e-59	9.14e-58	18.8239	18.9724	19.8658	20.603	13.4081	13.2083
TGME49_209620	aspartyl protease ASP4	ASP4	-6.16	4.4e-75	1.31e-73	14.7429	15.1501	15.7242	16.3191	8.80545	8.79651
TGME49_209630	coiled-coil domain-containing protein	N/A	0.93	0.015	0.0212	9.95156	9.93317	9.38244	8.53135	10.8865	10.8515
TGME49_209640	hypothetical protein	N/A	1.92	0.000857	0.00138	9.43435	9.3834	9.15615	7.39101	11.1049	11.5278
TGME49_209650	telomerase reverse transcriptase, putative	N/A	-5.8	6.11e-40	4.58e-39	11.8959	11.4549	11.1484	11.2581	6.34739	5.29206
TGME49_209680	hypothetical protein	N/A	0.53	0.205	0.247	10.2459	9.87718	9.64086	8.71881	10.6579	10.539
TGME49_209690	small nuclear ribonucleoprotein	N/A	4.3	1.73e-28	8.88e-28	7.23723	7.63038	7.05783	6.96037	11.3522	12.0561
TGME49_209700	hypothetical protein	N/A	-0.77	0.0174	0.0244	13.2996	13.8954	13.9485	14.1642	12.7281	12.9696
TGME49_209705	hypothetical protein	N/A	-5.93	8.39e-61	1.33e-59	13.582	13.6352	14.4793	15.2625	7.56092	7.79452
TGME49_209710	ribosomal protein RPL28	RPl28	-1.75	9.81e-07	1.97e-06	12.0397	12.283	12.0681	11.3182	10.451	10.3874
TGME49_209720	DUF4149 domain-containing protein	N/A	-0.96	0.00278	0.00428	14.8976	15.3167	15.2005	14.8395	13.9703	14.3331
TGME49_209730	hypothetical protein	N/A	-3.47	4.53e-30	2.44e-29	10.5284	10.3292	10.8693	10.5047	6.99136	6.94333
TGME49_209740	hypothetical protein	N/A	-3.82	1.44e-37	9.98e-37	13.0976	13.431	13.1331	12.7255	9.41269	9.50253
TGME49_209755	cyst matrix protein MAG2	MAG2	0.63	0.158	0.195	7.31689	6.76318	8.22015	7.78653	7.66951	7.71552
TGME49_209770	helicase, putative	N/A	-2.63	3.18e-07	6.59e-07	8.47745	8.07443	7.2928	6.47957	5.76677	5.59461
TGME49_209790	radical SAM domain-containing protein	N/A	-0.83	0.166	0.203	7.70026	7.38336	7.57624	6.4534	6.99136	6.38911
TGME49_209800	formate/nitrite transporter FNT1	FNT1	7.02	6.42e-13	1.8e-12	3.45836	0	1.8554	2.89088	9.01015	9.42226
TGME49_209810	hypothetical protein	N/A	3.27	0.0283	0.0387	7.89451	3.32946	9.68283	10.9738	10.1856	10.231
TGME49_209820	syntaxin 1	STX1	1.04	0.00742	0.0109	7.53244	7.30294	6.5739	6.3719	8.40292	8.50985
TGME49_209830	leucine-rich repeat-containing protein LRRC45, putative	LLRC45	1.35	0.00119	0.0019	8.85636	9.77157	8.46964	8.79894	10.7894	10.6838
TGME49_209850	RNA recognition motif-containing protein	N/A	4.25	4.9e-09	1.13e-08	3.25768	4.00785	2.30094	2.07335	7.54134	8.09045
TGME49_209860	SRP40, C-terminal domain-containing protein	N/A	1.67	0.0168	0.0235	5.86037	7.11683	5.62768	6.88404	7.99435	8.52888
TGME49_209870	HAD hydrolase, family IIA protein	N/A	3.75	1.58e-23	6.92e-23	7.12369	7.87252	6.79413	6.78258	11.219	11.3761
TGME49_209890	hypothetical protein	ICAP4	-2.51	2.33e-24	1.04e-23	15.7063	15.832	16.4323	16.6979	13.2055	13.3176
TGME49_209900	hypothetical protein	N/A	-1.03	0.00121	0.00193	11.1543	11.4325	11.5127	11.3829	10.0002	10.5031
TGME49_209910	histone H2Bv	N/A	-3.46	4.41e-53	5.14e-52	17.8428	17.9657	18.0566	18.1354	14.3707	14.5105
TGME49_209920	PAN domain-containing protein	N/A	6.7	1.51e-16	4.99e-16	6.95136	5.2176	8.05951	10.6166	13.0937	12.9187
TGME49_209930	hypothetical protein	N/A	0.36	0.783	0.812	10.8203	7.06359	12.8975	14.0998	10.2291	10.3319
TGME49_209940	transporter/permease protein	N/A	4.98	8.67e-44	7.36e-43	6.82991	6.46771	7.2807	7.79698	11.7357	11.4973
TGME49_209945	hypothetical protein	N/A	-2.82	4.53e-05	8.12e-05	8.41848	9.63041	8.83072	10.283	5.72573	6.77644
TGME49_209950	thioredoxin, putative	N/A	1.5	1.06e-07	2.27e-07	12.1927	12.1344	12.3709	11.9225	13.7248	13.5954
TGME49_209960	glycosyltransferase	N/A	2.3	1.08e-10	2.7e-10	8.57787	8.5591	7.69037	7.32037	11.1036	10.571
TGME49_209970	Spc97 / Spc98 family protein	N/A	-1.06	0.00797	0.0116	10.0865	9.92871	9.35962	9.16425	9.30303	8.49703
TGME49_209985	rhoptry protein ROP42	ROP42	4.22	0.00802	0.0117	7.27761	2.59194	9.40211	11.369	10.5537	10.5201
TGME49_210095	rhoptry protein ROP43	ROP43	4.1	0.00918	0.0133	7.18158	2.32863	9.42702	10.8539	10.2772	10.3499
TGME49_210210	hypothetical protein	N/A	-5.6	3.43e-58	4.79e-57	17.8126	17.4968	18.2721	18.23	12.3818	11.6581
TGME49_210230	pseudouridine synthase, putative	N/A	-1.15	2.62e-07	5.47e-07	14.3467	14.2798	14.7699	14.836	13.0833	13.2337
TGME49_210255	mitochondrial import receptor subunit TOM7	TOM7	2.32	9.96e-13	2.77e-12	10.8596	10.9684	10.8733	10.9692	12.8809	13.5163
TGME49_210260	NAD-dependent glycerol-3-phosphate dehydrogenase	N/A	-5.26	1.22e-46	1.15e-45	16.0816	16.2482	15.6558	14.9402	11.1245	10.6595
TGME49_210270	hypothetical protein	N/A	2.91	7.08e-28	3.59e-27	8.91726	8.95087	9.22721	8.98858	11.9042	11.7719
TGME49_210280	aurora-related kinase ARK1	ARK1	-5.29	4.91e-61	7.89e-60	15.0435	14.5371	15.3083	15.5025	9.69641	9.32401
TGME49_210300	zinc finger protein, putative	N/A	8.34	5.19e-08	1.12e-07	1.27942	0	3.81687	4.2209	7.75358	7.46194
TGME49_210310	hypothetical protein	N/A	13.26	1.79e-34	1.11e-33	1.94666	0	2.64086	3.94849	13.6449	13.385
TGME49_210320	SAG-related sequence SRS37A	SRS37A	1.17	0.486	0.537	2.74623	2.32863	2.30094	2.07335	2.34259	4.22849
TGME49_210330	SAG-related sequence SRS37B	SRS37B	-3.46	0.0554	0.0733	4.18022	4.53157	3.14658	3.7902	2.19002	0
TGME49_210345	hypothetical protein	N/A	-4.02	2.28e-17	7.81e-17	9.21972	9.02238	8.11506	7.81765	5.51707	4.62416
TGME49_210360	DEAD (Asp-Glu-Ala-Asp) box polypeptide 41 family protein	N/A	1.69	8.85e-10	2.12e-09	10.1294	10.3201	10.3643	10.7066	11.9219	11.9208
TGME49_210370	rhoptry protein ROP54	ROP54	0.37	0.381	0.432	8.51171	9.3834	8.98033	9.35658	9.31691	9.4569
TGME49_210380	transmembrane protein 184, putative	N/A	-1.31	1.06e-06	2.11e-06	13.6206	13.3535	13.9473	14.1922	12.2781	12.0796
TGME49_210390	WD domain, G-beta repeat-containing protein	N/A	-0.5	0.294	0.342	8.53965	8.37467	7.98691	6.97884	7.96819	7.94692
TGME49_210400	hypothetical protein	N/A	-5.49	7.93e-34	4.82e-33	14.5984	13.9666	14.3306	13.8038	9.23031	8.27709
TGME49_210408	HMG (high mobility group) box domain-containing protein	N/A	-4.59	6.37e-77	2.04e-75	18.0173	18.2922	18.344	18.2385	13.6377	13.5087
TGME49_210412	hypothetical protein	N/A	2.23	0.00542	0.00804	7.15292	4.70849	8.80138	10.0365	8.37443	8.80694
TGME49_210420	hypothetical protein	N/A	5.45	9.93e-07	1.99e-06	4.18022	0	4.83261	5.41657	8.52357	8.46665
TGME49_210430	DnaJ domain-containing protein	N/A	-4.07	2.19e-35	1.41e-34	14.8809	14.4992	14.0772	14.347	10.8646	10.3588
TGME49_210440	polynucleotide adenylyltransferase	N/A	-0.43	0.356	0.405	11.5286	11.0231	10.9678	9.80769	10.7781	10.9516
TGME49_210450	hypothetical protein	N/A	-1.01	0.304	0.352	4.28956	5.17806	4.53962	4.64758	3.54712	4.09867
TGME49_210490	hypothetical protein	N/A	5.8	0.0718	0.0933	0	0	0	2.07335	3.60862	3.85238
TGME49_210600	KRUF family protein	N/A	2.5	0.0139	0.0198	3.0245	3.70817	4.83261	5.87664	6.32924	4.95949
TGME49_210678	OTU domain-containing protein OTUD1D	OTUD1D	-1.3	0.417	0.468	8.15509	4.25586	9.91967	12.089	6.65488	4.59235
TGME49_210682	hypothetical protein	N/A	11.56	1.13e-298	9.22e-295	9.71479	9.7782	10.8053	11.3505	21.151	21.4401
TGME49_210690	ribosomal protein RPS6	RPS6	4.74	3.53e-40	2.67e-39	11.0278	10.5725	11.5871	11.1471	15.2758	15.8002
TGME49_210700	VPS13 domain-containing protein	N/A	0.97	0.0126	0.018	10.7053	10.8539	10.64	11.2246	12.0559	11.3624
TGME49_210715	hypothetical protein	N/A	-5.39	0.263	0.31	0	3.17737	0	0	0	0
TGME49_210730	ATP-dependent protease ATPase subunit ClpY, putative	ClpY	3.87	4.53e-42	3.68e-41	8.35701	8.38772	8.12863	7.79698	12.1381	12.3364
TGME49_210740	hypothetical protein	N/A	-0.33	0.559	0.607	9.69256	10.2227	9.56309	8.7133	8.87122	10.1602
TGME49_210750	Ferredoxin-fold anticodon binding domain-containing protein	N/A	-2.21	7.92e-17	2.65e-16	12.076	12.4098	12.5014	12.4003	9.98576	10.0978
TGME49_210760	glutamine amidotransferase-related, putative	N/A	-0.79	0.00831	0.0121	13.6945	13.4607	13.6795	13.2081	12.7168	12.8726
TGME49_210770	hypothetical protein	N/A	-6.09	2.7e-53	3.18e-52	15.5932	15.9788	16.5922	17.5044	9.78897	9.6186
TGME49_210778	hemimethylated DNA binding domain-containing protein	N/A	0.75	0.0431	0.0577	10.7491	10.8986	10.4149	9.61748	11.669	11.4727
TGME49_210781	ubiquitin carboxyl-terminal hydrolase	N/A	-1.98	0.000161	0.000278	9.07449	8.4388	8.58727	9.19617	7.20552	6.28352
TGME49_210783	hypothetical protein	N/A	-1.56	0.0932	0.119	5.86037	4.09534	6.13732	6.09552	3.66759	3.79764
TGME49_210787	Erv1 / Alr family protein	N/A	9.08	7.52e-07	1.52e-06	0	0	1.8554	4.2209	7.02558	6.7835
TGME49_210790	dihydroorotate dehydrogenase	DHODH	7.8	5.2e-93	3.04e-91	4.48614	5.09559	5.01891	4.64758	12.5801	12.6079
TGME49_210800	activator of hsp90 ATPase, putative	N/A	1.35	0.00806	0.0117	9.02396	9.24437	8.76277	7.39101	10.3192	10.6451
TGME49_210810	conoid associated protein CAP1	CAP1	-1.87	1.7e-06	3.35e-06	14.4423	14.62	14.2731	13.579	12.2868	12.9556
TGME49_210815	hypothetical protein	N/A	-6.64	0.0475	0.0634	3.0245	3.70817	3.67619	0	0	0
TGME49_210820	transporter, putative	N/A	6.18	2.34e-05	4.29e-05	1.94666	0	3.94503	5.8367	6.77374	6.25333
TGME49_210830	RIO1 family protein	N/A	7.82	3.37e-06	6.51e-06	1.27942	0	0	0	7.25443	6.94333
TGME49_210840	arginyl-tRNA synthetase family protein	N/A	11.56	5e-14	1.48e-13	0	1.00419	1.8554	4.55215	10.646	10.9347
TGME49_210950	oocyst wall protein	N/A	-0.18	0.825	0.852	12.1634	9.14535	14.3105	15.552	11.4224	10.8084
TGME49_210960	replication factor C subunit 4, putative	N/A	5.1	1.78e-06	3.51e-06	3.0245	1.59055	3.34551	1.3809	7.48507	6.96212
TGME49_210970	hypothetical protein	N/A	-1.02	0.528	0.577	2.74623	2.32863	3.81687	4.2209	1.01295	2.25225
TGME49_210980	alternative splicing type 3 and, putative	N/A	0.77	0.00165	0.00259	10.7004	10.6949	10.7438	10.7716	11.3645	11.5562
TGME49_211010	SANT/Myb domain-containing protein	N/A	-0.26	0.328	0.377	12.2594	12.0531	12.0221	12.1117	12.0428	11.7414
TGME49_211020	polyadenylate-binding protein PABPN	PABPN	0.67	0.0138	0.0196	11.3524	11.7088	11.8865	12.0155	12.1322	12.295
TGME49_211030	hypothetical protein	N/A	-1.86	0.000651	0.00106	7.00044	7.08512	6.36061	6.94167	5.13357	5.29206
TGME49_211040	Sec61beta family protein	N/A	-0.36	0.328	0.377	13.3895	13.5993	13.5841	12.8217	12.9829	13.2869
TGME49_211050	ATPase, AAA family protein	N/A	-3.11	3.26e-10	8e-10	8.10361	9.01678	8.31809	8.34461	5.34707	5.73232
TGME49_211060	hypothetical protein	N/A	0.91	0.00395	0.00598	9.32622	9.39206	9.39371	9.051	10.0959	10.4314
TGME49_211080	hypothetical protein	N/A	2.06	3.64e-07	7.53e-07	6.69729	6.53184	6.19001	6.4534	8.58987	8.73411
TGME49_211090	aminotransferase, class V superfamily protein	N/A	-1.16	0.000317	0.000532	15.5812	15.4632	15.1096	14.4899	14.2347	14.4742
TGME49_211150	hypothetical protein	N/A	-0.64	0.0656	0.0859	11.2529	11.0189	10.5357	10.9079	10.755	10.1983
TGME49_211220	origin recognition complex subunit 4, putative	ORC4	-0.92	0.0926	0.118	7.96214	8.153	7.24379	6.16168	7.33851	6.92429
TGME49_211230	eukaryotic initiation factor-2B, alpha subunit, putative	N/A	1.98	4.36e-14	1.29e-13	10.6058	10.3144	10.2771	10.2793	12.3669	12.5264
TGME49_211240	peptidyl-tRNA hydrolase, putative	N/A	-0.61	0.0159	0.0224	10.6397	10.6781	10.8242	10.7887	9.94685	10.15
TGME49_211250	hypothetical protein	N/A	-1.59	6.59e-10	1.59e-09	15.5579	15.8782	15.5842	15.7401	14.0884	14.1864
TGME49_211260	rhoptry kinase family protein ROP26 (incomplete catalytic triad)	ROP26	4.24	1.13e-13	3.3e-13	6.73644	5.36572	8.68688	9.62922	10.38	10.452
TGME49_211270	sushi domain (scr repeat) domain-containing protein	N/A	-5.59	8.08e-59	1.15e-57	17.246	16.984	17.1321	17.6543	11.762	11.2487
TGME49_211280	hypothetical protein	N/A	-1.36	0.000105	0.000184	10.4047	10.6603	9.97139	9.42215	9.32036	9.02664
TGME49_211290	rhoptry protein ROP15	ROP15	2.32	0.00232	0.00359	8.74077	6.29367	10.7093	12.0655	10.2648	10.3343
TGME49_211300	DUF74 family protein, putative	N/A	-1.72	0.00293	0.0045	8.24608	7.70877	8.37609	7.21526	6.11287	6.45249
TGME49_211310	regulator of chromosome condensation, putative	N/A	1.45	0.000459	0.00076	9.30032	8.891	8.30621	8.14649	10.9069	10.0964
TGME49_211320	hypothetical protein	N/A	-6.48	2.82e-100	2.29e-98	18.9411	19.0634	19.922	20.4033	12.6754	12.3488
TGME49_211330	methionine aminopeptidase 1c	MAP1c	-0.02	0.977	0.983	6.88322	6.53184	7.54624	6.7614	6.99712	6.32282
TGME49_211340	hypothetical protein	N/A	-1.15	0.000605	0.000989	13.7306	13.5549	13.8399	14.3959	12.6922	12.274
TGME49_211350	CBS domain-containing protein	N/A	4.66	1.96e-17	6.75e-17	5.82448	6.68071	4.27274	5.57062	11.2419	10.6319
TGME49_211360	hypothetical protein	N/A	-1.43	4.23e-05	7.6e-05	11.6528	11.5706	11.2191	10.5142	10.0925	10.2755
TGME49_211385	hypothetical protein	N/A	6.93	9.91e-38	6.9e-37	4.95306	4.17783	3.52031	2.07335	11.0317	11.8037
TGME49_211390	ubiquitin-activating enzyme, putative	N/A	-4.24	3.8e-25	1.74e-24	9.13801	8.91825	9.30989	9.20011	5.13357	4.45761
TGME49_211400	DEAD/DEAH box helicase domain-containing protein	N/A	3.52	1.51e-11	3.97e-11	5.49983	5.00811	4.45603	3.61237	8.72095	8.78951
TGME49_211410	translation initiation factor sui1 protein	N/A	2.19	0.0139	0.0198	4.57522	4.59299	2.64086	4.64758	6.70501	6.75505
TGME49_211420	serine/arginine-rich splicing factor SR3	SR3	2.31	6.62e-14	1.95e-13	9.43732	9.31442	9.22089	8.7133	11.6741	11.6949
TGME49_211430	centrosomal protein CEP110, putative	CEP110	0.34	0.528	0.577	6.69729	6.31205	7.23128	6.69594	6.58776	7.08149
TGME49_211440	hypothetical protein	N/A	1.06	0.00171	0.00268	9.78882	10.1644	9.0136	9.25417	11.2555	10.8058
TGME49_211450	pseudouridine synthase, putative	N/A	1.64	3.05e-05	5.54e-05	9.01205	8.61198	8.324	8.88468	10.6768	10.2102
TGME49_211460	Myc-regulation protein MYR4	MYR4	6.61	5.08e-94	3.13e-92	6.8479	6.27505	6.99998	6.94167	13.1823	13.171
TGME49_211470	Fcf2 pre-rRNA processing protein	N/A	0.5	0.285	0.333	6.77456	6.76318	7.85443	7.24608	7.2924	7.23357
TGME49_211480	GTP-binding protein engA, putative	N/A	-2.8	2.12e-25	9.79e-25	13.2235	13.3043	14.1383	14.3658	10.6215	10.2879
TGME49_211600	hypothetical protein	N/A	1.28	0.00643	0.00948	9.97835	8.97702	9.51226	10.2126	10.9587	10.71
TGME49_211610	hypothetical protein	N/A	1.45	2.25e-05	4.13e-05	9.47253	8.86944	9.44881	9.37064	10.5712	10.7132
TGME49_211630	hypothetical protein	N/A	3.91	5e-19	1.83e-18	8.80203	9.78644	8.52709	9.13573	13.1684	13.402
TGME49_211640	NGX6 domain-containing protein	N/A	-4.52	1.07e-24	4.83e-24	14.0681	13.7861	13.675	14.0922	9.86181	8.76476
TGME49_211650	hypothetical protein	N/A	5.17	4.49e-24	1.99e-23	5.30524	5.68063	5.90489	7.1352	10.7357	10.5644
TGME49_211670	S1 RNA binding domain-containing protein	N/A	-0.16	0.566	0.613	12.1875	12.5827	12.4702	12.5159	12.1117	12.3516
TGME49_211675	hypothetical protein	N/A	-6.16	5.63e-79	1.92e-77	15.984	15.6871	16.5564	16.809	9.94238	9.36929
TGME49_211680	protein disulfide isomerase	PDI	2.95	7.28e-07	1.48e-06	6.41307	7.99702	6.72439	7.49732	10.2855	10.433
TGME49_211690	AAA family protein	N/A	-2.15	8.66e-13	2.42e-12	12.6169	12.4591	11.7517	11.7404	10.6238	10.1105
TGME49_211695	hypothetical protein	N/A	6.9	0.00144	0.00228	3.25768	0	2.30094	0	9.13818	8.78248
TGME49_211700	SAC3 domain-containing protein	N/A	0.97	0.00728	0.0107	9.44915	9.02795	8.55749	8.5684	10.4536	9.93937
TGME49_211710	TB2/DP1, HVA22 family protein	N/A	1.04	0.000404	0.000671	13.3271	13.631	13.4073	13.0306	14.4065	14.6423
TGME49_211720	AP2 domain transcription factor AP2IV-5	AP2IV5	-0.02	0.946	0.958	12.9351	12.6534	13.4787	13.8607	12.8443	12.7164
TGME49_211730	histone lysine methyltransferase SET8	SET8	-2.81	3.23e-24	1.44e-23	13.0263	12.8562	12.6599	12.9194	10.2778	9.97063
TGME49_211850	hypothetical protein	N/A	8.6	2.3e-31	1.29e-30	4.81356	2.32863	5.23493	6.53053	12.3608	12.6531
TGME49_211860	hypothetical protein	N/A	2.16	1.62e-10	4.03e-10	10.0364	10.1247	9.77411	9.13984	12.1034	12.3708
TGME49_211870	LSU ribosomal protein L18P, putative	N/A	11.68	8.83e-16	2.82e-15	0	1.00419	1.20743	3.40951	10.9	10.9442
TGME49_211890	RAP domain-containing protein	N/A	3.38	7.04e-18	2.46e-17	8.30586	8.51614	9.43523	8.63396	11.9646	11.6051
TGME49_211910	kinesin-related protein 3A, putative	N/A	-2.22	3.19e-12	8.65e-12	9.70248	9.25866	10.7082	10.8159	7.34304	7.2128
TGME49_211920	hypothetical protein	N/A	-2.23	0.0821	0.106	10.9848	8.45956	12.4197	14.4032	8.64777	6.75505
TGME49_212030	hypothetical protein	N/A	-1.31	0.113	0.142	12.641	10.1695	14.2057	16.1966	10.8351	10.2585
TGME49_212075	meiosis-specific nuclear structural protein 1, putative	N/A	-6.28	2.85e-95	1.87e-93	13.9049	14.1156	14.7797	15.2016	7.58789	7.88591
TGME49_212090	hypothetical protein	N/A	9.5	2.31e-48	2.31e-47	3.63451	2.00628	5.01891	3.61237	12.2093	12.3103
TGME49_212100	ubiquitin activating enzyme UBA1	UBA1	-1.05	0.0255	0.0351	8.80203	9.23236	8.93087	9.77372	7.67311	8.2442
TGME49_212110	histone lysine demethylase JMJD5	JMJD5	4.87	0.000219	0.000373	3.79146	1.00419	3.34551	0	7.48507	7.75556
TGME49_212130	phospholipase, patatin family protein	N/A	-2.53	4.26e-15	1.32e-14	14.8531	14.6983	14.6527	14.7457	12.5359	11.8937
TGME49_212140	hypothetical protein	N/A	-0.47	0.221	0.265	11.1195	10.8109	10.6623	11.1348	10.7981	10.1452
TGME49_212150	conserved oligomeric Golgi complex subunit 4	COG4	0.51	0.251	0.296	8.24608	8.88487	8.51682	8.74601	9.42769	8.71762
TGME49_212160	hypothetical protein	N/A	0.24	0.518	0.567	8.51171	9.01398	9.32764	9.06403	8.84271	9.19096
TGME49_212170	GIY-YIG catalytic domain-containing protein	N/A	-3.02	1.27e-19	4.77e-19	12.2292	12.1489	12.3179	12.278	9.47283	8.79301
TGME49_212180	hypothetical protein	N/A	-2.96	8.37e-21	3.28e-20	11.9327	11.6777	12.3802	12.08	8.61817	9.06336
TGME49_212190	RNA recognition motif-containing protein	N/A	-3.55	2.51e-26	1.2e-25	10.8134	11.0925	10.9996	11.3585	7.18548	7.61621
TGME49_212200	hypothetical protein	N/A	4.27	3.06e-31	1.71e-30	8.87841	9.58579	9.1824	8.87485	13.3599	13.7047
TGME49_212210	hypothetical protein	N/A	5.62	9.8e-45	8.58e-44	7.6601	6.69479	8.62124	8.52508	12.7406	12.9641
TGME49_212220	zinc finger (CCCH type) motif-containing protein	N/A	-1.12	6.29e-05	0.000112	14.4337	14.157	14.966	15.345	13.1527	13.2117
TGME49_212240	beta-1 tubulin, putative	N/A	-1.78	0.00197	0.00307	9.04751	10.4992	9.53536	10.2849	8.38326	7.92154
TGME49_212250	XPG N-terminal domain-containing protein	N/A	-0.31	0.203	0.245	13.6071	13.4324	13.7604	13.9115	13.1207	13.2974
TGME49_212260	zinc finger protein ZFP2	ZFP2	-1.15	0.000376	0.000627	14.2423	14.1832	14.1415	13.4826	13.0198	13.1098
TGME49_212270	CLAMP-linked invasion protein CLIP	CLIP	11.81	5.9e-118	8.63e-116	5.40581	4.86606	6.5739	7.90715	16.8145	17.0106
TGME49_212275	hypothetical protein	N/A	3.75	6.51e-14	1.91e-13	9.40731	8.38772	11.4193	12.4438	12.625	12.825
TGME49_212280	hypothetical protein	N/A	6.81	3.24e-05	5.87e-05	4.57522	1.00419	1.8554	0	10.2498	10.4865
TGME49_212290	ribosomal protein RPS19	RPS19	8.4	2.75e-50	2.92e-49	4.18022	5.17806	4.17156	5.61851	12.8273	13.3763
TGME49_212300	dense granule protein GRA32	GRA32	10.73	1.63e-135	3.6e-133	3.79146	3.70817	3.67619	3.17338	14.3123	14.4109
TGME49_212310	vacuolar ATP synthetase	N/A	-2.38	6.38e-14	1.88e-13	14.2559	14.7086	14.3758	14.0497	11.948	12.2686
TGME49_212410	dense granule protein GRA11A	GRA11A	1.95	0.279	0.326	3.79146	0	2.91577	3.94849	4.60968	4.71558
TGME49_212420	hypothetical protein	N/A	5.47	0.116	0.146	0	0	0	3.17338	4.06863	2.25225
TGME49_212710	phenylalanine-4-hydroxylase	N/A	-3.01	6.14e-34	3.75e-33	11.5927	11.477	12.3634	12.4037	8.62749	8.41757
TGME49_212725	hypothetical protein	N/A	-2.45	7.06e-24	3.11e-23	13.8592	13.7243	14.4757	14.2824	11.2654	11.4232
TGME49_212735	transporter, major facilitator family protein	N/A	-5.07	2.39e-33	1.42e-32	11.5418	10.8133	11.397	10.8376	6.35638	5.96124
TGME49_212740	aromatic amino acid hydrolase AAH2	AAH2	2.48	1.67e-07	3.51e-07	9.22661	9.8044	11.0306	12.217	11.9926	12.0449
TGME49_212760	hypothetical protein	N/A	4.85	5.75e-08	1.24e-07	4.88499	4.9623	5.66539	2.07335	9.40729	9.99365
TGME49_212770	inner membrane complex protein IMC34	IMC34	5.61	2.18e-24	9.74e-24	5.25219	3.81513	6.82777	7.33477	10.2972	10.1493
TGME49_212775	hypothetical protein	N/A	0	1	1	0	0	0	3.17338	0	0
TGME49_212780	hypothetical protein	N/A	-0.52	0.331	0.38	9.46672	8.73627	10.2953	11.3164	8.9944	8.12976
TGME49_212800	kinetochore protein SPC24, putative	SPC24	-0.48	0.188	0.229	10.4759	10.1479	9.87411	9.20404	9.82746	9.85476
TGME49_212810	hypothetical protein	N/A	-3.28	2.3e-06	4.5e-06	8.94259	10.391	8.95771	10.6982	6.60295	6.54679
TGME49_212820	ubiquitin family protein	N/A	1.04	0.00812	0.0118	10.8859	10.8857	9.86806	8.92333	12.0191	11.8348
TGME49_212830	expressed protein JLP1	N/A	0.01	0.993	0.996	3.25768	3.70817	2.91577	2.89088	3.60862	3.41677
TGME49_212840	HIT zinc finger protein	N/A	-0.35	0.32	0.369	11.2162	11.1739	10.9257	10.2165	10.7227	10.9575
TGME49_212850	PI31 domain-containing protein	N/A	0.11	0.674	0.714	13.2304	13.5736	13.4649	13.6833	13.4546	13.5954
TGME49_212860	hypothetical protein	N/A	-0.3	0.464	0.515	11.292	10.7498	10.3309	9.46863	10.7541	10.7325
TGME49_212880	centrosomal protein CEP250	CEP250	-2.69	1.49e-11	3.92e-11	13.3159	13.1317	13.1561	13.7932	10.8658	10.1182
TGME49_212900	hypothetical protein	N/A	3.17	5.66e-22	2.33e-21	9.50407	9.86011	9.45958	10.0187	12.8874	12.8464
TGME49_212910	rhomboid protease ROM3	ROM3	-6.45	1.04e-95	7.03e-94	15.0642	15.2495	16.0543	16.629	8.70168	8.73046
TGME49_212920	hypothetical protein	N/A	3.71	1.55e-10	3.88e-10	6.8117	6.36582	8.32988	9.87332	10.0797	10.4838
TGME49_212930	NifU family domain-containing protein	N/A	0.23	0.394	0.445	11.6881	11.8266	12.2148	12.3744	11.8086	12.1518
TGME49_212937	hypothetical protein	N/A	0.19	0.71	0.748	7.57626	6.6082	8.58727	8.72975	7.08087	7.58826
TGME49_212940	condensin-2 complex subunit H2, putative	N/A	0.31	0.528	0.577	8.73595	8.64497	7.77041	6.97884	8.55319	9.33366
TGME49_212950	ADP-ribosylation factor family protein 2, putative	N/A	-3.58	7.5e-31	4.12e-30	10.8968	11.372	11.2207	11.3101	7.50137	7.66289
TGME49_212960	pre-mRNA-splicing regulator WTAP	N/A	3.51	1.06e-11	2.81e-11	7.26428	6.98558	7.01466	5.57062	10.6902	10.5639
TGME49_212970	protein kinase (incomplete catalytic triad)	N/A	-5.53	2.03e-38	1.44e-37	17.5355	16.899	18.2109	18.2116	12.1261	11.1694
TGME49_212980	KH domain-containing protein	N/A	5	3.61e-28	1.84e-27	9.38284	10.1415	10.7149	11.7302	14.8109	14.808
TGME49_212990	IMC sutures component ISC3 paralog	N/A	-3.16	1.61e-16	5.29e-16	14.6802	14.2004	14.7905	15.1417	11.6178	10.8859
TGME49_213000	replication factor C, subunit 5, putative	N/A	8.6	4.41e-08	9.59e-08	1.27942	0	0	0	7.83302	7.90546
TGME49_213010	hypothetical protein	N/A	-0.49	0.342	0.391	8.10361	7.81569	7.3048	6.67344	7.03681	7.80843
TGME49_213020	RING zinc finger protein	N/A	-6.71	4e-82	1.58e-80	15.1306	14.8068	13.8416	13.4388	8.53549	7.94692
TGME49_213030	clathrin light chain, putative	N/A	-1.46	8.37e-11	2.11e-10	12.3802	12.3289	12.6706	12.7197	10.9472	10.8405
TGME49_213040	centromere protein CENP-C	CENPC	1.32	0.0261	0.0358	8.95924	8.37029	8.06657	9.69213	10.1774	9.81311
TGME49_213050	hypothetical protein	N/A	4.13	2.17e-15	6.81e-15	6.93463	8.01396	6.97016	8.00949	11.5937	11.7967
TGME49_213060	WD domain, G-beta repeat-containing protein	N/A	-1.21	0.00516	0.00768	10.1764	10.0514	9.48616	10.2223	9.21927	8.50559
TGME49_213065	hypothetical protein	N/A	1.47	0.00659	0.0097	7.09385	7.97988	7.0292	8.03619	9.06191	9.08066
TGME49_213067	dense granule protein GRA36	GRA36	-2.92	3.99e-06	7.67e-06	11.5847	13.2231	12.231	13.6048	9.62845	9.77466
TGME49_213069	ATP synthase mitochondrial F1 complex assembly factor 1, putative	ATP11	6.5	1.83e-05	3.38e-05	0	1.59055	2.30094	0	6.7329	6.62747
TGME49_213072	protein SLY1	SLY1	-0.66	0.32	0.368	7.35512	6.158	6.74214	7.06779	6.51735	5.83102
TGME49_213100	hypothetical protein	N/A	3.6	0.0504	0.0671	3.93301	0	0	0	6.66215	6.14787
TGME49_213115	hypothetical protein	N/A	0.6	0.282	0.33	7.09385	7.85382	6.26561	7.1996	8.28309	7.94377
TGME49_213240	hypothetical protein	N/A	1.89	5.69e-05	0.000101	7.93715	7.24672	7.2562	6.55536	9.67321	9.33606
TGME49_213255	hypothetical protein	N/A	4.2	7e-06	1.32e-05	4.73841	7.74304	4.61863	6.62736	11.4852	10.5933
TGME49_213280	SAG-related sequence SRS25	SRS25	16.2	1.8e-130	3.6e-128	4.57522	2.00628	3.14658	2.07335	19.7485	19.8916
TGME49_213290	hypothetical protein	N/A	-3.56	1.43e-15	4.52e-15	8.92576	9.55139	8.35317	7.96387	5.51707	5.9234
TGME49_213300	hypothetical protein	N/A	1.79	0.0258	0.0355	4.18022	5.29356	3.67619	3.7902	6.85211	6.32282
TGME49_213310	hypothetical protein	N/A	-2.29	1.12e-06	2.24e-06	10.9868	11.3144	10.37	11.4898	9.10655	8.58854
TGME49_213325	TBC domain-containing protein TBC18	TBC18	-2.44	8.99e-09	2.04e-08	10.8968	11.2294	10.2495	10.9715	8.93412	8.26453
TGME49_213340	GMC oxidoreductase	N/A	0.36	0.767	0.799	11.4804	8.03624	13.7904	14.9331	11.1169	10.8093
TGME49_213350	ribosomal protein RPS15	RPS15	5.72	6.17e-39	4.46e-38	5.45359	5.62291	5.77293	6.19365	10.8202	11.5626
TGME49_213360	leucine rich repeat-containing protein	N/A	-1.69	0.0612	0.0805	4.3912	4.9623	5.42278	6.19365	3.27102	2.99833
TGME49_213370	formin FRM3	FRM3	-5.18	3.04e-67	6.38e-66	13.2659	12.9908	12.3656	12.3577	8.1729	7.7192
TGME49_213380	hypothetical protein	N/A	-2.91	0.188	0.228	3.63451	2.32863	2.64086	3.40951	1.6022	0
TGME49_213388	hypothetical protein	N/A	-3.14	2.11e-42	1.73e-41	12.466	12.4386	11.6198	11.5742	9.26056	9.37163
TGME49_213392	surface antigen repeat-containing protein	N/A	1.8	2.58e-09	6.04e-09	9.51255	9.3615	8.22015	7.98229	11.3976	11.057
TGME49_213400	zinc finger (CCCH type) motif-containing protein	N/A	-1.69	1.16e-07	2.47e-07	12.6938	12.5005	12.3915	12.8913	11.0671	10.7375
TGME49_213410	small nuclear ribonucleoprotein f (snrnp-f), putative	N/A	1.9	0.00532	0.00791	8.38807	8.64859	8.58727	6.4534	10.003	10.7474
TGME49_213415	hypothetical protein	N/A	0.77	0.234	0.279	6.91769	7.39203	6.90861	8.56229	7.96232	7.92154
TGME49_213420	RAP domain-containing protein	N/A	-0.42	0.144	0.178	10.9011	10.53	11.1401	11.3327	10.3204	10.3015
TGME49_213460	hypothetical protein	N/A	-2.76	1.56e-14	4.71e-14	11.5418	11.0596	11.8049	11.7096	8.23027	8.83269
TGME49_213480	hypothetical protein	N/A	0.42	0.459	0.51	12.1759	13.3328	12.9765	14.3571	13.1244	13.437
TGME49_213490	hypothetical protein	N/A	-1.43	0.595	0.64	1.27942	3.00733	0	2.89088	1.01295	1.65581
TGME49_213520	peptidase M20D, amidohydrolase	N/A	1.28	0.000688	0.00112	11.6243	12.2572	11.9932	12.6107	13.1543	13.358
TGME49_213530	hypothetical protein	N/A	-1.47	0.000314	0.000527	10.8019	10.1994	10.819	10.183	9.24006	8.85129
TGME49_213550	palmitoyltransferase DHHC4	DHHC4	-1.84	2.09e-08	4.63e-08	14.2011	13.8379	14.2134	14.6408	12.3781	11.974
TGME49_213560	hypothetical protein	N/A	-5.18	5.86e-27	2.86e-26	8.1259	8.1011	8.96529	8.855	2.72229	3.41677
TGME49_213570	hypothetical protein	N/A	0.38	0.21	0.253	12.9043	13.2411	13.2994	13.3668	13.2171	13.6692
TGME49_213580	ribosomal protein L41	RPL41	4.2	5.19e-10	1.26e-09	4.0619	3.46704	4.06274	4.2209	7.54134	8.13529
TGME49_213590	hypothetical protein	N/A	2.75	2.17e-20	8.37e-20	10.0921	10.1441	9.75018	9.33524	12.7118	13.0077
TGME49_213600	hypothetical protein	N/A	2.62	1.53e-09	3.64e-09	6.69729	7.36587	6.24085	6.02619	9.86653	9.47118
TGME49_213610	hypothetical protein	N/A	0.97	0.000657	0.00107	14.7307	14.2791	15.3788	15.5794	15.5354	15.4513
TGME49_213620	ABC1 family protein	N/A	-5.11	3.8e-45	3.36e-44	15.7041	15.2075	15.8261	16.0969	10.6478	10.0118
TGME49_213635	hypothetical protein	N/A	6.72	1.44e-14	4.36e-14	6.28688	2.81453	5.58897	5.70979	12.482	11.5205
TGME49_213650	ATP-binding domain 1 family protein	N/A	0.54	0.0852	0.11	11.9624	11.8012	12.1132	11.8346	12.1446	12.661
TGME49_213660	zinc finger (CCCH type) motif-containing protein	N/A	3.23	1.12e-09	2.68e-09	9.80042	8.40495	10.5395	9.90263	12.2443	12.7108
TGME49_213670	MIC60 domain-containing protein	N/A	0.59	0.116	0.146	7.29082	7.37464	7.3402	7.40474	7.92049	7.92474
TGME49_213680	MmgE/PrpD family protein	N/A	-4.77	1.11e-74	3.24e-73	14.5798	14.7127	14.749	14.7092	10.0481	9.6964
TGME49_213690	E3 ubiquitin-protein ligase RBX1, putative	N/A	-3.13	2.13e-22	8.94e-22	13.386	13.2861	13.7873	13.611	9.86968	10.4897
TGME49_213700	coiled-coil domain-containing protein	N/A	-1.1	0.295	0.343	5.5881	4.70849	5.23493	3.61237	3.882	4.38521
TGME49_213710	WD domain, G-beta repeat-containing protein	N/A	3.14	5.43e-25	2.48e-24	7.38006	7.25624	8.66378	8.92809	10.4739	10.4325
TGME49_213720	dynein regulatory complex subunit 7, putative	N/A	-2.58	1.03e-24	4.65e-24	11.6256	11.8353	12.0446	12.1319	9.22541	9.08638
TGME49_213730	lanthionine synthetase C family protein	N/A	1.08	0.00197	0.00308	13.8138	14.1381	13.6036	12.9372	14.9197	15.2032
TGME49_213740	methyltransferase, putative	N/A	-3.06	7.47e-16	2.4e-15	11.838	11.572	11.6228	12.0762	8.96531	8.262
TGME49_213746	hypothetical protein	N/A	0.36	0.325	0.374	9.84364	9.76325	9.80822	9.24276	9.92511	10.3611
TGME49_213748	hypothetical protein	N/A	-5.33	2.7e-51	2.98e-50	10.3008	10.8994	11.2992	11.3602	5.34707	5.33113
TGME49_213752	herpesviridae ul52/ul70 dna primase	N/A	-5.13	2.33e-18	8.31e-18	11.0416	10.6648	9.92357	8.23365	5.89571	5.61058
TGME49_213760	hypothetical protein	N/A	-1.02	0.16	0.197	8.95094	6.73621	11.0279	12.2868	7.33396	7.08149
TGME49_213770	Superkiller viralicidic activity 2 family 2, putative	N/A	3.44	9.18e-15	2.8e-14	6.2055	5.62291	5.62768	5.30391	9.24249	9.44582
TGME49_213780	radical SAM domain-containing protein	N/A	2.25	0.00817	0.0119	5.40581	4.86606	4.69354	6.69594	6.93246	7.7192
TGME49_213790	CRAL/TRIO domain-containing protein	N/A	-1.92	3.22e-06	6.24e-06	9.74149	9.18078	8.54237	8.08814	7.72956	7.40357
TGME49_213800	protein phosphatase 2b regulatory subunit, putative	N/A	0.35	0.311	0.36	12.4863	12.5314	12.2096	11.4736	12.8117	12.8971
TGME49_213810	iron-sulfur cluster protein ISCA	ISCA	0.06	0.839	0.865	10.3879	10.2166	9.90399	9.42552	10.3031	10.4308
TGME49_213820	hypothetical protein	N/A	-0.41	0.459	0.51	10.7053	9.31442	12.0934	13.006	9.90304	9.61167
TGME49_213830	Ufm1-conjugating enzyme 1	UFC1	2.12	7.79e-10	1.88e-09	9.96193	10.1117	9.78485	9.14802	12.0002	12.293
TGME49_213840	choline transporter-like protein, putative	N/A	-1.71	0.0047	0.00704	7.73933	9.34151	8.32988	8.26408	7.17535	6.92429
TGME49_213850	MORN repeat-containing protein	N/A	-4.47	2.18e-21	8.72e-21	16.7186	16.9181	16.0131	14.77	12.5889	12.079
TGME49_213860	hypothetical protein	N/A	-2.53	4.51e-10	1.1e-09	12.8689	13.736	12.8458	12.8433	10.535	11.0926
TGME49_213870	UBA/TS-N domain-containing protein	N/A	-3.02	3.58e-26	1.7e-25	13.9734	13.6058	14.1909	14.31	10.9259	10.6221
TGME49_213880	hypothetical protein	N/A	1.26	0.0439	0.0588	5.25219	5.78958	6.70641	7.72223	6.71204	6.87887
TGME49_213890	Myb family DNA-binding domain-containing protein	N/A	1.01	0.00274	0.00422	9.07067	8.6304	9.27982	9.04224	9.96313	9.77022
TGME49_213900	regulator of chromosome condensation RCC1	N/A	1.19	0.000776	0.00126	11.4564	11.0273	10.4812	9.83835	12.5073	12.3866
TGME49_213910	hypothetical protein	N/A	1.93	1.47e-07	3.12e-07	9.41637	9.51813	9.30093	8.65708	11.6018	11.1633
TGME49_213920	hypothetical protein	N/A	-2.81	1.86e-18	6.65e-18	12.0954	12.0439	11.7423	11.9099	9.5246	8.92815
TGME49_213930	exosome complex component RRP45, putative	N/A	0.4	0.19	0.231	9.2872	9.03072	9.35385	9.63214	9.55713	9.56635
TGME49_213940	CHCH domain-containing protein	N/A	-2.06	1.38e-15	4.36e-15	15.6228	15.845	15.8471	15.9997	13.5458	13.8019
TGME49_213950	hypothetical protein	N/A	3.48	1.55e-17	5.34e-17	7.1957	6.76318	7.95681	8.67983	10.4213	10.5015
TGME49_213970	ribosomal RNA small subunit methyltransferase B, putative	N/A	1.44	0.000187	0.000321	8.40031	8.7226	9.03176	8.33747	9.96681	10.054
TGME49_214070	hypothetical protein	N/A	-2.29	1.16e-10	2.91e-10	9.68257	9.60827	9.48879	9.00218	7.21048	7.50529
TGME49_214080	toxofilin	N/A	1.43	0.0627	0.0823	11.5153	9.45337	13.2467	15.2643	12.1509	12.3494
TGME49_214090	signal peptidase	N/A	2.78	1.82e-12	5e-12	8.996	8.74982	7.88671	8.07103	12.013	11.1838
TGME49_214100	hypothetical protein	N/A	3.63	9.76e-33	5.73e-32	8.39421	8.16316	7.6249	7.72223	12.0822	11.7144
TGME49_214110	protein yipf5, putative	N/A	2.69	2e-21	8.03e-21	8.41848	8.37029	7.35181	7.1352	11.0148	11.1342
TGME49_214120	hypothetical protein	N/A	-1.01	0.0172	0.0241	8.13325	7.94497	6.59359	6.3149	7.14454	6.93067
TGME49_214130	hypothetical protein	N/A	-3.74	3.26e-30	1.77e-29	11.5678	11.0885	10.3996	10.2067	7.73991	7.47509
TGME49_214140	hypothetical protein	N/A	-1.34	0.00014	0.000242	10.6754	10.5132	9.67361	10.2849	9.38988	9.11324
TGME49_214150	mitochondrial import inner membrane translocase subunit TIM23	TIM23	-1.03	0.000382	0.000636	9.57868	9.77157	9.58046	9.41877	8.70872	8.58451
TGME49_214160	hypothetical protein	N/A	-5.93	0.14	0.174	2.74623	2.81453	1.20743	0	0	0
TGME49_214170	hypothetical protein	N/A	-4.01	2.57e-27	1.27e-26	9.81421	9.77655	8.84722	9.02901	5.48463	6.06917
TGME49_214180	epsin-like protein EPSL	EPSL	0.02	0.94	0.953	13.3173	13.3553	12.7596	12.159	13.3676	13.3514
TGME49_214190	SAG-related sequence SRS46	SRS46	-1.21	0.034	0.0461	7.26428	7.3212	7.35181	7.27625	5.48463	6.5301
TGME49_214200	WD domain, G-beta repeat-containing protein	N/A	-0.23	0.61	0.654	7.81444	7.74304	6.98515	6.3149	7.5175	7.58017
TGME49_214210	rRNA pseudouridine synthase	N/A	7.26	4.76e-72	1.24e-70	4.73841	5.00811	5.42278	4.90099	11.8847	12.2843
TGME49_214220	hypothetical protein	N/A	7.17	4.3e-102	3.75e-100	11.0464	11.0575	11.9811	12.6411	18.0668	18.3639
TGME49_214230	Dopey, N-terminal domain-containing protein	N/A	-1.59	1.59e-05	2.94e-05	9.92639	9.65941	8.51165	8.08814	8.39857	7.9994
TGME49_214240	bromodomain-containing protein	N/A	2.53	6.62e-17	2.22e-16	8.29934	8.31668	7.91046	7.96387	10.9959	10.6523
TGME49_214250	cytochrome b-c1 complex subunit 11	QCR11	-0.2	0.517	0.567	12.6034	13.0696	12.668	12.823	12.5102	12.7939
TGME49_214260	alpha-glucan water dikinase 1, putative	N/A	-2.28	1.5e-11	3.93e-11	14.1553	13.8211	13.3502	12.7936	11.875	11.5414
TGME49_214270	translation initiation factor IF-2, putative	N/A	-0.35	0.298	0.346	12.537	11.864	13.005	13.2422	11.7999	11.9653
TGME49_214280	phosphoadenosine phosphosulfate reductase family protein	N/A	-2.15	5.32e-11	1.36e-10	14.0554	13.3765	14.1745	14.247	11.6315	11.5885
TGME49_214290	DJ-1 family protein	N/A	7.77	6.29e-75	1.85e-73	5.96298	5.65206	6.40587	5.30391	13.439	13.6548
TGME49_214295	hypothetical protein	N/A	2.86	0.553	0.601	0	0	0	0	0.593608	1.88313
TGME49_214300	hypothetical protein	N/A	3.92	1.07e-12	2.98e-12	8.28621	6.85379	8.74966	8.05372	11.8601	11.4119
TGME49_214310	hypothetical protein	N/A	-3.92	1.78e-48	1.78e-47	14.34	14.5579	14.9388	15.0957	10.6835	10.3688
TGME49_214320	facilitative glucose transporter GT1	GT1	5.69	1.26e-29	6.67e-29	7.8771	6.46771	9.39371	9.91227	12.9927	13.0325
TGME49_214330	DnaJ domain-containing protein	N/A	0.53	0.202	0.244	12.0353	12.2096	11.8603	11.0468	12.2675	12.9681
TGME49_214340	hypothetical protein	N/A	0.46	0.36	0.41	11.742	11.0738	11.1258	9.80251	11.823	11.9913
TGME49_214350	GTP-binding protein, putative	N/A	0.04	0.936	0.949	7.55451	7.0744	6.86065	6.06127	7.42224	7.3235
TGME49_214370	hypothetical protein	N/A	-0.43	0.332	0.381	11.8073	11.8539	11.5654	10.38	11.3463	11.4545
TGME49_214385	hypothetical protein	N/A	0.37	0.36	0.41	10.5045	10.857	10.7059	9.91227	10.7973	11.2932
TGME49_214400	hypothetical protein	N/A	7.35	8.24e-14	2.41e-13	0	2.32863	6.63219	7.87792	8.52157	8.54766
TGME49_214410	hypothetical protein	N/A	5.46	3.1e-69	7.08e-68	7.61879	8.14277	8.05241	8.00048	13.4505	13.2655
TGME49_214420	hypothetical protein	N/A	10.87	7.37e-12	1.97e-11	0	0	2.64086	0	8.64043	8.745
TGME49_214430	hypothetical protein	N/A	8.49	4.64e-06	8.88e-06	0	0	2.64086	3.94849	6.80034	5.62637
TGME49_214440	4'-phosphopantetheinyl transferase superfamily protein	N/A	3.34	2e-18	7.16e-18	9.04751	9.49016	10.2802	11.0522	12.5793	12.6759
TGME49_214470	ubiquitin-like protease ULP1	ULP1	2.02	7.71e-11	1.95e-10	8.9757	9.33029	9.24911	8.8993	11.1589	11.2132
TGME49_214480	replication factor a protein 3 protein	N/A	1.85	2.36e-09	5.53e-09	8.69679	9.01678	8.92311	9.20796	10.6345	10.8002
TGME49_214490	peptidase M16 inactive domain-containing protein	N/A	-1.51	9.4e-06	1.77e-05	9.24709	9.07175	8.44275	8.52508	7.82008	7.47944
TGME49_214500	ankyrin repeat-containing protein	N/A	1.53	2.18e-07	4.55e-07	9.54875	9.72432	9.12266	9.30994	10.9905	11.3226
TGME49_214510	hypothetical protein	N/A	-3.58	9.72e-41	7.51e-40	10.9939	11.0328	11.1443	11.1089	7.29708	7.57611
TGME49_214520	general transcription factor IIH polypeptide 4 GTF2H4	GTF2H4	-1.52	0.00415	0.00625	7.23723	6.78965	6.79413	6.7614	5.69771	5.33113
TGME49_214530	DnaJ domain-containing protein	N/A	4.99	4.36e-53	5.1e-52	6.93463	6.51607	6.61302	6.67344	11.8094	11.5971
TGME49_214540	hypothetical protein	N/A	1.59	0.00022	0.000375	8.33166	8.66299	8.30023	7.74398	9.70523	10.3949
TGME49_214560	hypothetical protein	N/A	-1.13	0.00011	0.000192	10.5519	10.2587	10.6137	10.5487	9.41591	9.14785
TGME49_214570	hypothetical protein	N/A	-0.85	0.1	0.127	14.4253	13.1833	15.6516	16.6403	13.133	13.0245
TGME49_214575	hypothetical protein	N/A	0.28	0.8	0.828	3.25768	5.09559	4.45603	3.94849	4.80621	4.65528
TGME49_214580	tetratricopeptide repeat-containing protein	N/A	-3.34	1.69e-10	4.2e-10	8.14785	9.18578	8.16198	8.51878	5.5951	5.29206
TGME49_214590	micro-fibrillar-associated protein 1	N/A	-2.35	3.07e-27	1.52e-26	14.6874	14.6669	15.0576	15.1478	12.2846	12.3693
TGME49_214600	hypothetical protein	N/A	2.39	5.08e-06	9.68e-06	7.18158	7.2657	5.93607	7.01508	9.92511	9.20417
TGME49_214610	trafficking protein particle complex subunit TRS85	TRS85	-4.24	5.14e-26	2.43e-25	9.45796	9.10902	7.38609	7.59632	5.23455	4.93434
TGME49_214620	prolyl hydroxylase PHYb	PHYb	1.05	0.0243	0.0335	11.4811	11.1808	10.6762	9.44889	12.5553	12.2047
TGME49_214630	hypothetical protein	N/A	-4.39	3.38e-29	1.77e-28	13.9008	13.548	13.1866	13.7072	9.67051	8.93292
TGME49_214740	hypothetical protein	N/A	-0.69	0.218	0.262	7.1957	7.03067	5.66539	6.50528	6.4178	6.45249
TGME49_214750	hypothetical protein	N/A	6.95	5.27e-18	1.85e-17	1.94666	4.53157	4.76475	6.3719	10.6565	10.6349
TGME49_214760	erythronate-4-phosphate dehydrogenase domain-containing protein	N/A	2.14	1.59e-10	3.95e-10	9.57598	9.34375	9.64794	9.06403	11.6847	11.5241
TGME49_214770	ras-related protein RAB1B	RAB1B	-0.34	0.222	0.266	12.8532	12.7751	12.8527	12.411	12.4972	12.4528
TGME49_214780	hydrolase, NUDIX family protein	N/A	2.42	0.0152	0.0215	3.45836	2.00628	5.99649	7.51007	5.11249	5.12426
TGME49_214790	glycoprotein	N/A	4.65	1.08e-14	3.29e-14	3.79146	5.33009	4.06274	4.2209	9.42769	9.33486
TGME49_214800	hypothetical protein	N/A	-1.07	0.00347	0.00528	10.9837	11.5553	11.1131	11.5474	10.0349	10.403
TGME49_214810	PRA1 family protein, putative	N/A	-3.91	2.05e-61	3.36e-60	13.8277	13.7702	14.5091	14.4639	10.0059	9.77554
TGME49_214820	DNA repair protein DRE	N/A	5.11	4.06e-32	2.34e-31	7.20968	6.63764	6.53369	5.66487	11.8002	12.2477
TGME49_214830	exportin-T, putative	N/A	-4.46	8.9e-28	4.49e-27	13.6543	13.4217	13.4752	12.7052	9.37999	8.71578
TGME49_214835	hypothetical protein	N/A	2.01	0.0093	0.0135	5.13987	4.00785	5.58897	4.90099	6.5801	6.68138
TGME49_214840	AP2 domain transcription factor AP2X-7	AP2X7	-1.58	3.33e-05	6.02e-05	15.2288	15.1177	14.5465	15.4587	13.4862	13.688
TGME49_214850	1-deoxy-D-xylulose 5-phosphate reductoisomerase, putative	N/A	8.99	0.000238	0.000403	0	3.00733	0	0	11.0353	10.5903
TGME49_214870	ribosomal protein L9, N-terminal domain-containing protein	N/A	1.48	0.00368	0.00558	9.51537	8.57059	9.03176	8.03619	10.4452	10.7343
TGME49_214880	apical cap protein AC4	AC4	6.61	0.000141	0.000243	4.3912	0	6.87681	7.6777	10.0307	9.77377
TGME49_214900	hypothetical protein	N/A	-1.44	0.606	0.65	2.40114	0	3.14658	4.33997	1.33745	0
TGME49_214910	hypothetical protein	N/A	8.42	3.69e-05	6.65e-05	0	0	0	0	6.03661	6.45249
TGME49_214920	GPI-anchored wall transfer protein GWT1, putative	N/A	-1.43	0.00186	0.00291	9.44029	10.2372	8.69145	7.95457	8.39421	8.53308
TGME49_214930	ATP synthase-associated protein	N/A	3.23	1.19e-38	8.54e-38	9.69505	9.8365	9.58539	9.66387	12.9044	13.0898
TGME49_214940	MIC2-associated protein M2AP	M2AP	14.89	6.16e-106	6.31e-104	3.63451	0	4.53962	4.97645	17.1299	17.3066
TGME49_214950	hypothetical protein	N/A	7.9	8.84e-110	9.79e-108	6.11926	5.70865	5.99649	5.57062	13.6076	13.9563
TGME49_214960	AP2 domain transcription factor AP2X-8	AP2X8	2.81	8.73e-08	1.87e-07	8.38191	7.96253	7.3402	8.69666	11.2054	10.7438
TGME49_214970	DNA replication licensing factor MCM2	MCM2	3.76	4.87e-07	9.99e-07	3.93301	3.00733	5.42278	5.36134	7.41365	6.84553
TGME49_214980	hypothetical protein	N/A	-2.66	8.34e-15	2.55e-14	16.1244	15.9885	16.37	17.0324	13.5661	13.2146
TGME49_214990	hypothetical protein	N/A	-4.67	2.29e-47	2.21e-46	14.2237	13.979	13.2149	13.8197	9.48005	9.39602
TGME49_215010	hypothetical protein	N/A	-0.51	0.32	0.369	7.34249	7.85382	7.56631	8.46084	7.00286	7.2128
TGME49_215020	hypothetical protein	N/A	1.14	0.0124	0.0177	8.16947	8.01396	7.6249	6.67344	9.34089	9.1034
TGME49_215030	helicase, putative	N/A	-1.09	0.00921	0.0133	10.6123	10.0445	9.18889	9.22353	9.60412	8.83439
TGME49_215040	HEAT repeat-containing protein	N/A	-2.93	9.49e-13	2.64e-12	11.0513	10.624	9.70563	9.21576	8.23027	7.55564
TGME49_215055	hypothetical protein	N/A	3.16	0.111	0.14	3.25768	0	1.8554	0	5.27304	5.2519
TGME49_215060	small GTP-binding protein sar1, putative	N/A	-1.54	4.06e-09	9.41e-09	10.4153	10.4698	10.0836	9.90021	8.91143	8.88942
TGME49_215070	ferredoxin FD	FD	3.17	2.92e-22	1.22e-21	8.08856	8.38338	8.10137	8.58055	11.3726	11.4507
TGME49_215080	hypothetical protein	N/A	0.72	0.0755	0.0978	9.81192	9.45337	8.18812	8.4674	10.6955	9.92827
TGME49_215090	ATP binding protein, putative	N/A	1.9	2.44e-05	4.47e-05	10.7562	10.3438	10.3147	9.1803	12.3554	12.5624
TGME49_215100	PP-loop family protein	N/A	-0.45	0.914	0.931	0	3.00733	0	0	2.01938	1.65581
TGME49_215130	adaptor-related protein complex 3, sigma 2 subunit	N/A	-1.07	0.00325	0.00496	12.0176	12.5065	11.7637	11.1151	11.1363	11.2839
TGME49_215140	hypothetical protein	N/A	-0.29	0.731	0.767	10.9	7.86632	13.2354	14.5837	9.83954	9.71867
TGME49_215150	AP2 domain transcription factor AP2X-9	AP2X9	-2.68	2.08e-14	6.24e-14	14.5602	14.4449	14.2467	14.9519	11.9878	11.6468
TGME49_215160	hypothetical protein	N/A	5.25	5.71e-66	1.14e-64	6.65705	6.77648	7.20591	7.45836	11.8353	12.0603
TGME49_215165	hypothetical protein	N/A	-5.61	3.59e-58	5e-57	14.6079	14.4498	15.1903	15.886	9.07558	8.75939
TGME49_215170	serine/threonine-protein phosphatase 2A catalytic subunit beta isoform, putative	N/A	-4.03	2.1e-61	3.43e-60	15.9085	15.8921	16.073	15.9901	12.0086	11.7208
TGME49_215210	F-box domain-containing protein	N/A	5.68	4.94e-61	7.9e-60	7.79603	8.30296	8.51682	8.76742	13.5046	13.9576
TGME49_215220	dense granule protein GRA22	GRA22	5.91	7.72e-56	9.94e-55	8.46001	9.29838	8.37609	8.63396	14.7335	14.9481
TGME49_215230	RNA recognition motif-containing protein	N/A	1	0.00545	0.00809	12.5045	12.2065	12.3883	11.6249	13.3126	13.4096
TGME49_215250	thiamin pyrophosphokinase, catalytic domain-containing protein	N/A	1.71	3.76e-07	7.76e-07	10.3089	9.9727	10.0304	10.618	11.8697	11.8498
TGME49_215260	carbamoylphosphate synthetase	N/A	-0.32	0.587	0.632	6.3887	5.98552	6.38342	6.57976	6.09149	5.64199
TGME49_215280	succinate dehydrogenase [ubiquinone] iron-sulfur subunit SDHB	SDHB	6.09	2.87e-64	5.36e-63	8.37573	8.03624	7.9644	8.71881	14.2628	14.3395
TGME49_215290	saccharopine dehydrogenase domain-containing protein	N/A	-1.95	2.53e-20	9.76e-20	17.0909	17.0347	17.5428	17.5497	15.0794	15.1385
TGME49_215300	hypothetical protein	N/A	3.02	2.97e-21	1.18e-20	9.95156	10.2396	9.62659	9.1723	12.9589	13.2699
TGME49_215320	ODAD3 domain-containing protein	N/A	0.73	0.0953	0.122	8.13325	7.84754	8.60192	9.1521	8.37443	9.00264
TGME49_215328	transporter, putative	N/A	-0.75	0.289	0.337	7.0787	8.153	8.08755	9.92423	6.96809	6.98066
TGME49_215347	hypothetical protein	N/A	1.06	0.0206	0.0287	8.33166	8.79951	9.11927	9.20404	9.07694	10.0555
TGME49_215350	hypothetical protein	N/A	-0.86	0.000274	0.000463	14.2605	14.3547	14.5603	14.4024	13.3665	13.5333
TGME49_215360	dense granule protein GRA62	GRA62	7.07	4.09e-79	1.41e-77	8.35701	7.58576	8.60678	8.61637	14.8352	15.2896
TGME49_215370	hypothetical protein	N/A	-2.23	2.54e-06	4.95e-06	10.6967	10.4523	10.1795	9.4555	8.76043	7.79102
TGME49_215380	hypothetical protein	N/A	0.02	0.925	0.94	11.9675	11.848	12.4395	12.5962	11.7712	12.0796
TGME49_215385	transporter, major facilitator family protein	N/A	-6.38	2.73e-70	6.55e-69	15.0048	15.0761	15.8567	16.6636	8.56875	8.75581
TGME49_215390	TIM10 family protein, putative	N/A	0.4	0.376	0.427	8.84297	9.84914	9.14952	9.16021	9.57553	10.0547
TGME49_215400	RNA recognition motif-containing protein	N/A	1.25	0.0143	0.0202	8.35071	9.07444	8.86758	8.01845	9.58895	10.3253
TGME49_215410	DPCD family protein	N/A	-3.91	7.41e-32	4.23e-31	9.50123	9.74983	9.6242	9.85094	5.84551	5.64199
TGME49_215420	synaptobrevin homolog YKT6, putative	N/A	-3.49	8.55e-21	3.35e-20	13.4212	13.6538	13.7457	12.8974	9.99298	10.1084
TGME49_215430	mitochondrial marker protein MYS	MYS	-1.13	4.6e-05	8.25e-05	14.2693	14.3728	15.0492	15.3109	13.0047	13.365
TGME49_215440	WWE domain-containing protein	N/A	9.82	2.84e-95	1.87e-93	4.65912	3.32946	4.95945	5.04816	13.6541	13.9675
TGME49_215450	aquaporin 1	N/A	-1.05	5.07e-06	9.68e-06	13.099	12.9242	13.7416	13.8147	11.9948	11.94
TGME49_215460	ribosomal protein RPS24	RPS24	2.99	2.5e-13	7.15e-13	9.98243	9.891	9.92745	9.06403	12.6216	13.1735
TGME49_215470	ribosomal protein RPL10A	RPL10A	8.86	6.13e-112	7.08e-110	5.19712	5.25608	5.01891	5.18169	13.7057	14.3243
TGME49_215480	Adenosine/AMP deaminase domain-containing protein	N/A	-3.8	2.09e-38	1.49e-37	10.3506	10.5231	10.604	10.8043	6.5333	6.76222
TGME49_215490	novel putative transporter NPT1	NPT1	3.37	3.6e-16	1.17e-15	9.55697	9.41775	9.74358	10.7769	12.7909	12.9186
TGME49_215500	TPR repeat-containing protein	N/A	-5.83	4.49e-39	3.27e-38	11.5664	11.1498	12.1246	11.6775	5.99116	4.98422
TGME49_215510	MraW methylase family protein	N/A	-0.82	0.00257	0.00397	12.7478	12.4201	12.649	12.4152	11.7077	11.8289
TGME49_215520	hypothetical protein	N/A	1.52	0.00338	0.00515	9.47832	8.44714	11.3126	12.4241	10.5576	10.5786
TGME49_215530	hypothetical protein	N/A	3.82	1.53e-09	3.64e-09	8.58325	6.81565	10.3221	11.3593	11.5241	11.9736
TGME49_215540	hypothetical protein	N/A	-0.51	0.306	0.354	6.79325	6.95082	7.76174	7.52271	6.04776	6.64308
TGME49_215550	exonuclease V, putative	N/A	-5.56	2.23e-38	1.58e-37	13.9279	13.4736	13.9445	14.2988	8.5803	7.58422
TGME49_215560	histone arginine methyltransferase PRMT5	PRMT5	-6.56	7.04e-47	6.71e-46	10.7633	10.4596	9.81662	8.96098	4.23386	4.05266
TGME49_215570	AP2 domain transcription factor AP2X-11	AP2X11	-3.78	6.87e-20	2.61e-19	10.6653	10.6157	10.0231	10.7769	7.13412	6.54679
TGME49_215590	flavoprotein subunit of succinate dehydrogenase SDHA	SDHA	7.99	1.15e-42	9.54e-42	3.25768	2.59194	4.61863	3.7902	10.7048	10.7118
TGME49_215600	hypothetical protein	N/A	7.7	2.56e-38	1.82e-37	3.0245	3.00733	0	0	10.3025	10.7247
TGME49_215610	ATP synthase-associated protein	ICAP11	4.19	5.63e-25	2.57e-24	7.62923	8.47595	8.62124	9.13984	12.2558	12.3557
TGME49_215620	hypothetical protein	N/A	-3.84	1.32e-09	3.15e-09	8.36951	7.93907	6.75968	7.88773	4.72524	3.95599
TGME49_215640	zinc finger, C3HC4 type (RING finger) domain-containing protein	N/A	-4.54	2.71e-32	1.57e-31	12.2748	12.0633	11.3587	11.32	8.01721	7.13766
TGME49_215650	hypothetical protein	N/A	-5.8	0.0163	0.0229	2.74623	4.59299	2.30094	1.3809	0.593608	0
TGME49_215660	hypothetical protein	N/A	-0.47	0.252	0.298	10.2959	9.75319	9.64794	8.93284	9.4718	9.68514
TGME49_215670	cAMP-dependent protein kinase	N/A	-2.86	6.36e-18	2.22e-17	11.1056	11.0473	12.8823	12.6114	7.88676	8.49488
TGME49_215680	SAG-related sequence SRS18	SAG2E	-2.83	2.82e-16	9.2e-16	10.2926	10.6585	10.3912	9.8856	7.66228	7.67433
TGME49_215690	hypothetical protein	N/A	-1.87	2.82e-09	6.58e-09	10.7407	10.4861	9.71015	9.62922	8.9431	8.53308
TGME49_215700	phosphatidylinositol 3- and 4-kinase	N/A	0.52	0.172	0.21	9.76535	9.19323	8.24526	7.87792	10.2044	9.83281
TGME49_215710	hypothetical protein	N/A	4.01	7.53e-36	4.94e-35	7.35512	7.57818	6.77701	6.34368	11.5572	11.3921
TGME49_215730	Gas41, putative	N/A	6.47	4.1e-40	3.09e-39	4.18022	4.32988	2.91577	4.33997	10.6349	10.6762
TGME49_215740	notchless, putative	N/A	1.4	0.000475	0.000786	9.00405	9.01958	8.28819	7.39101	10.4181	10.4001
TGME49_215750	cytidine and deoxycytidylate deaminase zinc-binding region domain-containing protein	N/A	2.59	4.15e-07	8.54e-07	5.86037	5.68063	4.89742	4.09112	8.35886	8.32384
TGME49_215775	rhoptry protein ROP8	ROP8	6.19	2.13e-29	1.13e-28	6.63649	5.40049	7.5156	8.63396	12.2712	12.329
TGME49_215785	rhoptry protein ROP2A	ROP2A	8.05	1.19e-37	8.27e-37	2.74623	3.17737	6.40587	7.45836	10.9694	10.7325
TGME49_215885	hypothetical protein	N/A	-0.44	0.613	0.657	14.3297	10.9749	16.249	17.6725	13.0788	12.9608
TGME49_215890	hypothetical protein	N/A	-1.59	9.71e-07	1.95e-06	13.2051	13.2306	12.4939	11.9087	11.775	11.465
TGME49_215895	AP2 domain-containing protein	N/A	8.87	7.11e-68	1.53e-66	5.01805	4.53157	6.70641	7.73314	13.231	13.8949
TGME49_215900	hypothetical protein	N/A	2.21	0.0655	0.0859	1.27942	3.9147	5.58897	4.97645	5.48463	4.95949
TGME49_215910	hypothetical protein	N/A	2.08	7.67e-12	2.04e-11	9.41939	9.33927	9.34517	9.65816	11.6252	11.2702
TGME49_215920	hypothetical protein	N/A	-0.76	0.0388	0.0522	10.1853	10.242	10.7082	9.96185	9.5156	9.39832
TGME49_215930	mediator complex subunit MED21	MED21	3.26	2.5e-11	6.48e-11	5.74991	5.17806	4.36729	4.44996	8.65871	8.75939
TGME49_215940	acetyl-CoA transporter AT1	AT1	-4.71	1.55e-47	1.51e-46	11.6718	11.2432	11.7729	12.1641	6.75346	6.79752
TGME49_215950	hypothetical protein	N/A	4.29	2.02e-17	6.92e-17	5.78768	6.73621	4.36729	5.41657	10.5571	10.6814
TGME49_215955	hypothetical protein	N/A	3.7	0.411	0.462	0	0	0	2.53927	2.01938	1.88313
TGME49_215960	hypothetical protein	N/A	0.51	0.312	0.36	8.40031	7.33025	8.68229	8.41411	8.27837	8.62633
TGME49_215970	hypothetical protein	N/A	8.04	3.34e-140	9.42e-138	6.5291	7.00831	7.54624	7.26124	14.7184	14.9234
TGME49_215980	hypothetical protein	N/A	10.7	3.71e-126	6.91e-124	5.5881	6.21771	5.07603	6.19365	16.444	16.7846
TGME49_215990	helicase, putative	N/A	1.76	0.000206	0.000352	5.78768	5.93897	6.55394	6.7614	7.5215	7.68568
TGME49_216000	alveolin domain containing intermediate filament IMC3	ALV3	5.88	3.33e-16	1.08e-15	6.61565	4.32988	7.82141	8.84999	11.987	11.4102
TGME49_216010	ribosomal protein RPL24	RPL24	0.02	0.965	0.973	10.2695	9.97415	9.87612	8.82979	10.1039	10.1917
TGME49_216020	Ufm1-specific protease UFSP	UFSP	9.95	2.14e-09	5.03e-09	0	0	0	2.07335	7.88986	7.63974
TGME49_216030	VHS domain-containing protein	N/A	1.74	0.000344	0.000576	8.16947	7.80275	7.04359	6.09552	9.99443	9.40406
TGME49_216040	30S ribosomal protein S15, putative	N/A	2.68	2.58e-12	7.04e-12	7.82356	8.54362	7.21865	7.53524	10.8483	10.9715
TGME49_216050	tetratricopeptide repeat-containing protein	N/A	5.09	2.17e-13	6.23e-13	3.93301	5.40049	4.06274	2.07335	9.67321	10.1154
TGME49_216053	hypothetical protein	N/A	0.89	0.287	0.334	5.30524	4.00785	5.62768	5.46977	5.48463	5.78954
TGME49_216055	hypothetical protein	N/A	11.77	4.23e-08	9.22e-08	1.27942	0	0	3.17338	10.8112	11.3287
TGME49_216060	hypothetical protein	N/A	6.34	5.68e-39	4.11e-38	4.88499	3.70817	6.65111	6.4534	10.7528	10.5212
TGME49_216070	transmembrane protein TqsA-like, putative	N/A	4.14	6.82e-22	2.8e-21	6.28688	6.72254	7.88671	7.24608	10.8756	10.3752
TGME49_216080	apical complex lysine methyltransferase	AKMT	4.9	5.52e-38	3.87e-37	8.21869	7.96253	9.09184	9.85094	12.803	13.1566
TGME49_216090	hypothetical protein	N/A	-5.75	4.66e-95	3.03e-93	16.3326	16.3919	17.4575	17.912	10.5722	10.6562
TGME49_216120	hypothetical protein	N/A	1.05	0.000198	0.000339	9.50973	9.67725	9.44068	9.57259	10.5136	10.7752
TGME49_216130	ubiquitin conjugating enzyme E2, putative	N/A	-1.31	5.82e-06	1.11e-05	13.9383	14.3761	14.2341	14.0016	12.7871	12.9302
TGME49_216140	tetratricopeptide repeat-containing protein ANK1	ANK1	-2.81	1.82e-20	7.04e-20	11.35	11.4652	11.5082	11.2684	8.36778	8.80347
TGME49_216150	peptidase family M3 protein	N/A	-5.19	1.32e-62	2.26e-61	16.7877	16.6605	16.811	16.3725	11.7282	11.3098
TGME49_216155	hypothetical protein	N/A	-5.18	5.63e-79	1.92e-77	15.7966	15.8973	15.9537	15.563	10.7664	10.5608
TGME49_216160	hypothetical protein	N/A	1.36	0.0878	0.113	11.6775	8.7599	13.8464	14.9326	12.0143	12.3979
TGME49_216170	cysteine desulfurase NFS2	NFS2	3.02	9.49e-35	5.94e-34	8.90443	8.89405	9.51743	9.44558	11.8719	11.9661
TGME49_216180	hypothetical protein	N/A	2.98	2.88e-17	9.81e-17	11.5603	12.0755	11.5153	10.9899	14.6564	14.9708
TGME49_216190	hypothetical protein	N/A	6	0.112	0.141	0	0	0	0	4.02419	3.79764
TGME49_216210	hypothetical protein	N/A	2.67	0.00219	0.0034	4.18022	4.25586	3.94503	2.07335	6.69087	6.93701
TGME49_216220	AP2 domain transcription factor AP2XI-5	AP2XI5	-4.23	4.47e-49	4.55e-48	16.0279	16.0951	15.9844	16.4657	11.909	11.754
TGME49_216240	hypothetical protein	N/A	-3.46	7.76e-25	3.53e-24	11.6944	11.2851	11.0005	10.5127	8.09447	8.00545
TGME49_216250	RecF/RecN/SMC N terminal domain-containing protein	N/A	-0.93	0.00127	0.00202	9.62114	9.56103	9.1824	8.96561	8.62934	8.68971
TGME49_216260	eukaryotic initiation factor-2B, gamma subunit, putative	N/A	3.17	3.77e-27	1.86e-26	8.47745	8.30755	8.22647	7.9263	11.4607	11.6502
TGME49_216270	hypothetical protein	N/A	1.99	1.7e-06	3.35e-06	7.63959	8.00269	7.84625	8.60453	9.73484	9.90741
TGME49_216275	ACR, YggU family COG1872 domain-containing protein	N/A	1.91	2.63e-08	5.79e-08	8.11851	7.84754	8.18163	7.78653	9.82908	9.96288
TGME49_216280	adenylate cyclase alpha 2	N/A	-0.99	0.127	0.158	6.02754	6.43454	6.08262	5.52107	5.17481	5.36916
TGME49_216285	zinc finger, c2h2 type domain-containing protein	N/A	5.72	8.5e-33	5e-32	5.82448	6.98558	6.38342	5.8367	12.0155	12.4309
TGME49_216290	hypothetical protein	N/A	2.67	0.000107	0.000186	4.18022	4.40029	4.06274	4.44996	7.00286	6.8114
TGME49_216335	hypothetical protein	N/A	0.66	0.182	0.222	7.22352	7.56292	6.5739	7.4318	8.1678	7.95319
TGME49_216370	golgi localizing protein GLP2	GLP2	-1.96	6.98e-10	1.68e-09	12.5395	12.1166	12.6475	12.2117	10.3301	10.4392
TGME49_216375	hypothetical protein	N/A	-2.15	4.44e-07	9.13e-07	10.1888	9.95965	9.94289	9.00218	7.88986	7.97802
TGME49_216380	phospholipid-translocating P-type ATPase, flippase subfamily protein	ATP2A	4.45	4.48e-12	1.21e-11	5.82448	7.01953	6.26561	7.81765	11.2407	10.6696
TGME49_216390	RNA methyltransferase, TrmH family protein	N/A	12.82	1.63e-17	5.61e-17	0	0	2.64086	0	10.6624	10.6251
TGME49_216400	meiotic recombination protein DMC1 family protein	N/A	-6.43	1.04e-158	5.02e-156	16.1292	16.3681	16.7387	16.73	9.88451	9.75683
TGME49_216410	hypothetical protein	N/A	0.64	0.108	0.137	9.0397	9.86634	10.0519	9.73893	10.2075	10.0922
TGME49_216415	hypothetical protein	N/A	-6.28	3.57e-119	5.62e-117	13.8045	13.7343	14.4912	14.6729	7.6659	7.30889
TGME49_216420	hypothetical protein	N/A	-0.05	0.988	0.992	1.94666	0	3.14658	2.53927	0	1.88313
TGME49_216430	TBC domain-containing protein TBC7	TBC7	-1.01	0.000368	0.000615	12.5491	12.3076	11.8001	11.5326	11.5589	11.2677
TGME49_216435	hypothetical protein	N/A	-2.9	3.55e-29	1.86e-28	13.8349	13.911	14.2928	14.0078	10.865	11.0772
TGME49_216440	OTU domain-containing protein OTU8	OTU8	-2.81	4.61e-11	1.18e-10	14.4243	14.1027	14.1013	13.01	11.5131	11.4184
TGME49_216450	proteasome subunit alpha type-3, putative	N/A	-2.64	4.9e-17	1.65e-16	11.5118	11.8093	11.789	12.2868	8.99871	9.05609
TGME49_216460	hypothetical protein	N/A	-4.07	5.83e-71	1.45e-69	11.8187	11.8273	13.2736	13.3354	7.77386	7.73749
TGME49_216470	hypothetical protein	N/A	8.56	3.03e-33	1.8e-32	1.27942	2.81453	5.01891	5.66487	10.3192	10.7914
TGME49_216480	NMD3 family protein	N/A	-3.63	3.13e-51	3.44e-50	14.0569	13.9154	14.5079	14.7402	10.3623	10.3505
TGME49_216490	hypothetical protein	N/A	-1.82	9.46e-09	2.14e-08	13.2213	13.8118	13.4918	13.2515	11.7103	11.7346
TGME49_216500	tRNA synthetase, putative	N/A	0.2	0.624	0.667	10.3474	9.75991	10.0661	10.5671	10.5	10.0148
TGME49_216510	thioredoxin, putative	N/A	2.45	1.58e-11	4.14e-11	9.19885	9.21781	8.2138	7.41833	11.7132	11.5911
TGME49_216530	ribosome recycling factor protein	N/A	4.15	1.83e-14	5.5e-14	8.07335	7.3121	6.36061	4.73709	11.8497	11.9099
TGME49_216540	dolichyl-phosphate beta-glucosyltransferase	N/A	-1.88	7.11e-06	1.34e-05	9.65218	9.22268	8.51682	8.07961	7.82657	7.28422
TGME49_216560	methyltransferase domain-containing protein	N/A	0.43	0.516	0.566	7.36765	6.57814	6.21565	4.90099	7.38757	7.50529
TGME49_216580	hypothetical protein	N/A	2.36	8.71e-07	1.75e-06	7.71013	7.92123	7.2807	6.12898	10.3403	9.98295
TGME49_216585	hypothetical protein	N/A	-6.42	2.35e-146	8.03e-144	15.085	14.9477	15.6078	15.6113	8.73997	8.45785
TGME49_216590	HEAT repeat-containing protein	N/A	-2.31	4.18e-12	1.13e-11	13.4206	13.0864	13.4121	13.927	11.1182	10.7738
TGME49_216600	exonuclease III APE	APE	1.27	0.000123	0.000215	9.77714	9.41775	9.50708	9.07265	10.9639	10.78
TGME49_216610	ribosomal RNA large subunit methyltransferase J protein	N/A	-5.92	2.47e-51	2.73e-50	19.0426	18.6344	19.4136	19.6399	13.303	12.4235
TGME49_216620	EF hand domain-containing protein	N/A	2.81	3.96e-07	8.18e-07	6.08933	5.40049	8.40981	9.2655	8.87279	8.17072
TGME49_216630	trigger factor protein, putative	N/A	-0.99	0.0537	0.0712	7.35512	7.46775	7.37475	8.00048	6.70501	6.10343
TGME49_216640	GHMP kinase, putative	N/A	-4.03	9.35e-75	2.74e-73	17.0087	16.9253	17.643	17.7685	12.9012	12.9652
TGME49_216650	mature soluble cytoskeleton protein MSC1A	MSC1A	5.83	2.06e-41	1.63e-40	8.14057	8.97702	8.77575	8.04498	14.2567	14.617
TGME49_216660	hypothetical protein	N/A	-5.1	9.85e-86	4.34e-84	16.6456	16.4341	16.9789	17.205	11.5513	11.3269
TGME49_216670	FUSE-binding protein 2 / KH-type splicing regulatory protein	FUBP2	2.65	2.56e-11	6.63e-11	9.83465	9.2728	10.118	9.5665	12.4698	11.9363
TGME49_216680	serine/threonine protein phosphatase 6 structural subunit PP6S	PP6S	-0.55	0.194	0.235	11.1802	10.8803	10.725	9.70605	10.5256	10.4503
TGME49_216700	peptide deformylase, putative	N/A	-5.6	9.09e-37	6.15e-36	10.6254	10.3292	11.2902	11.2071	5.38271	4.2693
TGME49_216710	apicomplexan amino acid transporter ApiAT5-4	ApiAT5-4	3.5	9.69e-23	4.1e-22	9.65218	9.52209	10.1112	10.8639	12.9819	13.1818
TGME49_216720	hypothetical protein	N/A	1.62	3.64e-10	8.92e-10	14.897	14.9901	15.4259	15.4905	16.3739	16.7328
TGME49_216730	DNA replication licensing factor MCM3, putative	MCM3	-0.01	0.98	0.986	10.8706	10.7346	10.8158	10.7162	10.9665	10.6048
TGME49_216740	riboflavin kinase	N/A	-0.83	0.0471	0.0629	10.3251	10.337	8.94243	7.97311	9.60507	9.38446
TGME49_216750	Paf1/RNA polymerase II complex component LEO1	LEO1	1.56	0.000111	0.000193	8.78813	8.95672	8.324	7.4318	10.4336	10.4358
TGME49_216760	RNA pseudouridine synthase superfamily protein	N/A	-1.85	3.14e-09	7.33e-09	12.0597	12.2766	11.874	11.3443	10.3789	10.2661
TGME49_216770	hypothetical protein	N/A	8.86	9.98e-09	2.25e-08	1.27942	0	0	0	8.17798	8.07615
TGME49_216780	hypothetical protein	N/A	0.99	0.00933	0.0135	9.06299	8.96546	8.39305	7.66635	10.1172	9.88707
TGME49_216785	hypothetical protein	N/A	-3.96	1.97e-45	1.76e-44	11.4498	11.1651	11.7373	11.5795	7.26879	7.44423
TGME49_216790	ATP-binding cassette sub-family E member 1, putative	N/A	-3.47	1.26e-44	1.1e-43	14.1069	13.8689	14.3324	14.5272	10.5126	10.5275
TGME49_216800	flagellar/basal body protein	N/A	-1.32	0.00192	0.003	7.44059	7.51612	7.6249	7.88773	6.27338	6.06917
TGME49_216810	5'-nucleotidase, C-terminal domain-containing protein	N/A	-1.83	1.06e-09	2.53e-09	11.5967	11.5625	11.6861	12.0272	9.93039	9.54573
TGME49_216820	transporter facilitator protein TFP1	TFP1	2.79	1.54e-25	7.15e-25	11.0801	10.9122	12.1136	12.445	13.7199	13.8489
TGME49_216830	DTW domain-containing protein	N/A	-1.9	1.69e-12	4.66e-12	11.6813	11.7658	12.2373	12.4076	9.64872	9.97681
TGME49_216840	hypothetical protein	N/A	0.94	0.0196	0.0273	8.33166	8.51614	7.31669	6.67344	9.5246	9.1803
TGME49_216850	hypothetical protein	N/A	0.92	0.325	0.374	4.95306	4.00785	4.17156	4.33997	5.7935	4.95949
TGME49_216860	DEAD (Asp-Glu-Ala-Asp) box polypeptide DDX39	DDX39	3.45	2.13e-37	1.46e-36	10.9256	11.0879	11.0423	10.7093	14.3618	14.5402
TGME49_216870	DNA excision repair helicase	N/A	-1.28	1.39e-05	2.59e-05	12.1795	11.9727	12.2377	12.492	10.9818	10.5903
TGME49_216875	cpw-wpc domain-containing protein	N/A	-5.73	7.47e-58	1.02e-56	14.9641	14.9535	15.8611	16.6681	9.30883	9.14099
TGME49_216880	POC1 centriolar protein, putative	POC1	-0.52	0.214	0.257	8.13325	7.94497	8.22647	7.80735	7.2924	7.72288
TGME49_216890	hypothetical protein	N/A	0.28	0.249	0.295	12.9362	13.0447	12.7856	12.5568	13.1984	13.3474
TGME49_216900	cytokine induced apoptosis inhibitor 1 family protein	N/A	-0.11	0.686	0.726	13.5373	13.4249	13.9304	14.1657	13.164	13.5494
TGME49_216910	hypothetical protein	N/A	3.9	6.57e-32	3.77e-31	10.6691	10.9062	10.5254	9.9572	14.513	14.8555
TGME49_216920	mediator complex subunit MED8	MED8	-1.25	0.000754	0.00122	13.4885	13.8126	13.4702	12.8633	12.1157	12.6579
TGME49_216930	cholinephosphate cytidylyltransferase	N/A	-2.07	1.33e-16	4.42e-16	14.5541	14.6507	14.7945	14.7722	12.3669	12.6817
TGME49_216940	hypothetical protein	N/A	-5.71	3.55e-59	5.14e-58	15.6209	15.6165	16.4229	17.2213	9.8736	9.95117
TGME49_216950	helicase	N/A	-1.45	5.72e-07	1.17e-06	9.7463	9.46574	10.3382	10.4594	8.21305	8.11305
TGME49_216960	elongation factor Tu GTP binding domain-containing protein	N/A	0.11	0.713	0.75	9.74869	9.70185	9.65966	9.21576	9.89535	9.78172
TGME49_216965	leucine rich repeat-containing protein	N/A	-2.47	5.29e-08	1.14e-07	9.36733	10.2587	8.60678	8.27159	7.22528	7.5963
TGME49_216970	coronin, putative	N/A	5.26	2.54e-29	1.34e-28	8.48322	9.11426	8.72309	9.85094	13.9315	14.2268
TGME49_216980	WDR8 protein isoform 3 family protein	N/A	-1.58	0.00314	0.0048	7.38006	8.37467	7.08591	7.03286	6.42636	6.37048
TGME49_216990	LysM domain-containing protein	N/A	-2.63	2.27e-16	7.45e-16	12.4974	12.4495	12.1851	11.581	9.92133	9.76488
TGME49_217000	hypothetical protein	N/A	-2.33	5.74e-17	1.93e-16	14.3115	14.3307	14.5708	14.9063	11.8196	12.1417
TGME49_217010	CD2BP2-like protein	N/A	2.07	3.53e-08	7.72e-08	10.2202	10.0487	9.25221	8.47392	12.0207	12.3722
TGME49_217020	ATPase, AFG1 family protein	N/A	-0.16	0.537	0.585	10.2357	10.2444	10.325	10.5838	10.1245	10.0245
TGME49_217030	hypothetical protein	N/A	0.22	0.555	0.603	11.7794	11.825	11.4193	10.7093	11.7817	12.2215
TGME49_217040	hypothetical protein	N/A	-5.79	1.15e-42	9.5e-42	14.5607	14.7967	15.7507	16.8312	8.78894	8.9981
TGME49_217050	ADA2-A transcriptional co-activator SAGA component	N/A	1.58	1.88e-07	3.93e-07	9.88561	9.80602	8.60678	8.69107	11.634	11.1818
TGME49_217160	Der1 family protein	N/A	-1.01	0.00038	0.000633	14.0111	14.0313	14.0459	14.1592	12.7547	13.2303
TGME49_217220	zinc finger, C3HC4 type (RING finger) domain-containing protein	N/A	4.41	2.04e-47	1.97e-46	7.64988	7.33025	7.18009	7.49732	11.9054	11.8868
TGME49_217340	hypothetical protein	N/A	2.26	5.21e-13	1.47e-12	8.29279	8.17325	6.68821	6.57976	10.6238	10.3433
TGME49_217350	N6-adenosine-methyltransferase subunit METTL3	METTL3	2.96	1.87e-15	5.89e-15	7.12369	6.91519	5.90489	5.57062	10.1238	9.79663
TGME49_217360	hypothetical protein	N/A	1.32	0.0332	0.0451	7.62923	6.81565	7.5361	8.7621	8.93862	8.1408
TGME49_217370	hypothetical protein	N/A	4.5	0.11	0.138	0	0	2.30094	3.17338	2.34259	2.78978
TGME49_217380	hypothetical protein	N/A	0.55	0.629	0.672	4.73841	2.00628	5.87301	7.33477	4.41688	4.45761
TGME49_217390	hypothetical protein	N/A	0.39	0.508	0.558	8.52853	7.01953	8.94627	8.46084	8.32491	8.36677
TGME49_217400	hypothetical protein	N/A	3.15	2.79e-12	7.6e-12	7.82356	8.17325	8.11506	9.10664	10.9338	11.3458
TGME49_217410	hypothetical protein	N/A	-0.99	0.534	0.583	2.40114	4.32988	2.64086	4.64758	3.27102	2.07947
TGME49_217420	hypothetical protein	N/A	-2.92	2.64e-14	7.87e-14	11.0039	11.5801	10.8864	11.4113	8.19812	8.58451
TGME49_217430	protease inhibitor PI1	PI1	-0.03	0.926	0.94	10.4392	10.8293	11.0152	11.5026	10.5005	10.7242
TGME49_217440	HCNGP family protein	N/A	-0.43	0.095	0.121	13.197	12.983	13.0009	12.8204	12.5443	12.7701
TGME49_217450	general transcription factor IIH polypeptide 5 GTF2H5	GTF2H5	0.79	0.00786	0.0115	11.1767	11.5966	11.6913	11.8052	12.0408	12.3323
TGME49_217460	glutaminyl-tRNA synthetase (GlnRS)	N/A	5.78	1.68e-22	7.06e-22	4.0619	3.00733	4.53962	4.09112	9.13165	9.33726
TGME49_217470	hypothetical protein	N/A	5.01	7.7e-25	3.51e-24	5.30524	5.81558	5.77293	6.82403	10.4692	10.6605
TGME49_217480	hypothetical protein	N/A	-0.19	0.722	0.758	11.463	10.4472	10.6957	9.61158	11.1106	10.5359
TGME49_217490	hypothetical protein	N/A	-5.24	1.67e-48	1.67e-47	15.4135	15.5408	16.4229	17.2382	10.1844	10.2892
TGME49_217500	HMG (high mobility group) box domain-containing protein	N/A	3	7.08e-16	2.28e-15	8.54517	8.81892	8.76277	8.00949	11.6072	11.7554
TGME49_217510	inner membrane complex protein IMC19	IMC19	1.77	8.64e-10	2.08e-09	13.9774	13.6863	14.6265	14.6898	15.3857	15.8105
TGME49_217520	hypothetical protein	N/A	1.11	0.00157	0.00248	8.57787	8.01957	9.91381	10.189	9.42128	9.44248
TGME49_217530	dense granule protein GRA63	GRA63	6.33	1.26e-123	2.2e-121	9.57868	9.95234	9.90792	10.067	16.1186	16.0981
TGME49_217540	serine/arginine-rich splicing factor SR2	SR2	0.18	0.521	0.57	11.9783	12.3812	12.4605	12.7289	12.3335	12.4228
TGME49_217550	dynactin subunit 6, putative	N/A	1.12	0.00116	0.00185	12.1206	12.4645	12.0293	11.4407	13.2474	13.5861
TGME49_217555	hypothetical protein	N/A	0.36	0.305	0.353	11.5562	12.0815	11.7184	12.1489	11.9979	12.3878
TGME49_217560	DNA-directed RNA polymerase II RPB10	POLR2L	6.78	1.25e-32	7.28e-32	4.28956	5.93897	5.33191	6.06127	11.8732	12.3025
TGME49_217570	ribosomal protein RPS27	RPS27	4.12	6.94e-22	2.85e-21	9.00003	9.14535	8.37609	7.47147	12.818	13.4919
TGME49_217580	DNA-directed RNA polymerase III RPC6	POLR3F	-1.08	0.000553	0.000909	12.1206	12.1502	11.8537	11.2843	10.9654	11.1353
TGME49_217590	50S ribosomal protein L17, putative	N/A	-0.03	0.907	0.924	10.8507	10.9921	11.1959	11.3593	10.8942	10.8953
TGME49_217600	calcium-dependent protein kinase CDPK9	CDPK9	0.23	0.337	0.386	13.4958	13.4619	13.7833	14.0359	13.6771	13.7381
TGME49_217610	hypothetical protein	N/A	2.35	8.16e-09	1.85e-08	7.41668	7.89098	7.2562	7.26124	9.68486	10.2867
TGME49_217620	translation initiation factor IF-1, putative	N/A	-1.79	2.57e-06	5.01e-06	10.6044	10.2251	11.227	10.4935	8.61068	8.6727
TGME49_217630	hypothetical protein	N/A	0.04	0.95	0.961	5.89539	5.40049	5.90489	6.02619	5.57983	5.81733
TGME49_217640	hypothetical protein	N/A	7.2	3.67e-27	1.81e-26	7.90314	6.21771	9.35674	10.9091	14.2625	14.6666
TGME49_217650	GAS8 domain-containing protein	N/A	-2.9	4.84e-12	1.3e-11	8.90443	9.63954	9.08837	8.86992	6.31086	6.54679
TGME49_217660	Tctex-1 family protein	N/A	7.31	6.66e-32	3.82e-31	4.57522	3.70817	4.61863	5.8367	10.8424	11.8164
TGME49_217665	hypothetical protein	N/A	-1.69	6.84e-10	1.65e-09	13.3309	13.3695	13.5157	13.2415	11.4834	11.8175
TGME49_217670	ribosomal protein RPS6	RPS6	-1.52	0.00159	0.00251	11.6913	11.2622	10.9931	9.7335	10.0695	9.87142
TGME49_217680	dense granule protein GRA57	GRA57	9.83	2.21e-88	1.09e-86	4.0619	3.17737	3.94503	4.55215	13.5281	13.1375
TGME49_217688	hypothetical protein	N/A	6.32	0.00124	0.00197	4.57522	0	4.53962	6.67344	9.89072	9.74784
TGME49_217692	hypothetical protein	N/A	2.2	0.306	0.354	4.3912	0	3.34551	0	5.40021	5.65744
TGME49_217700	AP2 domain transcription factor AP2XII-2	AP2XII2	-2.3	0.000665	0.00108	8.46585	7.47593	9.17915	9.8231	6.36532	4.74481
TGME49_217710	DnaJ domain-containing protein	N/A	-0.05	0.918	0.934	7.78673	8.68783	8.39305	9.18428	8.12898	8.37381
TGME49_217720	hypothetical protein	N/A	6.11	2.18e-09	5.13e-09	2.74623	1.00419	0	1.3809	7.59551	7.91191
TGME49_217722	hypothetical protein	N/A	4.83	0.314	0.363	0	0	0	0	3.02259	2.67299
TGME49_217724	hypothetical protein	N/A	6.47	0.0187	0.0261	0	0	1.20743	0	4.66862	3.95599
TGME49_217726	hypothetical protein	N/A	6.29	0.00609	0.009	0	0	2.30094	4.09112	4.34643	4.00513
TGME49_217728	hypothetical protein	N/A	5.98	0.0153	0.0216	0	0	2.30094	4.2209	4.54823	2.67299
TGME49_217730	WD repeat-containing protein	N/A	3.59	2.42e-05	4.42e-05	2.74623	3.46704	3.67619	4.09112	6.55689	6.65852
TGME49_217740	3-ketoacyl-(acyl-carrier-protein) reductase	N/A	0.79	0.599	0.644	3.0245	4.76295	0	0	4.5165	5.2106
TGME49_217760	GTP-binding protein	N/A	2.31	3.89e-05	7e-05	5.74991	5.50004	4.53962	5.18169	8.12372	7.67053
TGME49_217770	hypothetical protein	N/A	0.82	0.133	0.166	7.41668	7.19814	5.77293	6.47957	8.48309	7.65136
TGME49_217780	Sec20 protein	N/A	-0.36	0.319	0.368	11.7049	11.5122	10.9847	10.232	11.2934	11.219
TGME49_217790	S1 RNA binding domain-containing protein	N/A	-0.72	0.164	0.201	7.93715	8.53583	7.78761	7.78653	7.94752	6.9929
TGME49_217800	hypothetical protein	N/A	-3.47	5.69e-39	4.12e-38	14.0497	13.7624	14.4222	14.5505	10.3158	10.5613
TGME49_217820	PCI domain-containing protein	N/A	-1	0.000307	0.000517	11.7468	11.3348	11.8669	11.8709	10.537	10.571
TGME49_217830	hypothetical protein	N/A	4.46	6.27e-19	2.28e-18	5.92958	6.74976	5.62768	6.65058	11.0091	10.6691
TGME49_217850	Sucrose-6F-phosphate phosphohydrolase	N/A	1.17	0.00012	0.000208	10.1764	10.5201	10.7635	11.1532	11.4952	11.5585
TGME49_217855	hypothetical protein	N/A	0.13	0.978	0.984	1.94666	0	0	0	1.82582	0.620822
TGME49_217860	hypothetical protein	N/A	-5.89	2.32e-40	1.76e-39	12.5066	12.5424	11.879	12.3198	7.10241	5.98594
TGME49_217870	palmitoyltransferase DHHC3	DHHC3	-0.59	0.0601	0.0792	13.2187	13.1148	13.2176	12.601	12.5781	12.5727
TGME49_217875	hypothetical protein	N/A	-2.2	0.000582	0.000953	8.56161	8.47595	7.55631	5.91551	6.4931	6.15877
TGME49_217880	RNA-binding protein Nova-1, putative	N/A	-1.41	0.00304	0.00466	11.2196	11.0349	10.5696	9.28047	9.76722	9.67378
TGME49_217890	peroxiredoxin PRX1	PRX1	6.39	1.11e-32	6.48e-32	8.9342	8.97414	10.8602	12.5289	15.2463	15.4313
TGME49_217900	hypothetical protein	N/A	-3.95	8.6e-51	9.34e-50	13.7704	14.0037	13.9304	13.7492	10.0619	9.81913
TGME49_217910	DNA polymerase (pol2) superfamily protein	N/A	-0.04	0.928	0.942	11.463	10.7557	10.5458	10.0583	11.3561	10.8252
TGME49_217940	hypothetical protein	N/A	5.94	1.15e-19	4.36e-19	3.25768	3.17737	4.53962	3.40951	8.80051	9.15875
TGME49_217951	hypothetical protein	N/A	-3.8	0.133	0.166	5.19712	0	4.76475	3.7902	1.82582	0
TGME49_217961	hypothetical protein	N/A	5.99	5.13e-20	1.96e-19	2.40114	4.59299	4.95945	4.73709	9.83713	9.81138
TGME49_218000	hypothetical protein	N/A	-4.4	1.41e-40	1.09e-39	13.2436	12.863	12.1153	12.3665	8.89763	8.4016
TGME49_218070	hypothetical protein	N/A	0.11	0.805	0.833	9.41637	9.10111	7.91046	7.53524	9.72619	8.9073
TGME49_218130	hypothetical protein	N/A	8.34	0.0814	0.105	0	0	0	0	6.64758	5.47761
TGME49_218200	UDP-sugar pyrophospharylase	N/A	-0.9	0.000925	0.00149	14.5124	14.353	14.3423	14.7381	13.5835	13.4778
TGME49_218210	Chromosome-associated kinesin KLP1, putative	N/A	-1.78	0.00535	0.00794	6.26026	6.46771	7.52588	6.55536	4.60968	4.65528
TGME49_218215	hypothetical protein	N/A	-2.55	6.11e-19	2.23e-18	12.6342	12.3147	12.5134	12.1646	9.9183	9.94489
TGME49_218220	CDK-related protein kinase CRK2	CRK2	2.62	1.71e-12	4.71e-12	9.57868	9.52406	10.014	10.7952	12.0161	12.3103
TGME49_218230	histone lysine methyltransferase, SET, putative	N/A	6.64	1.44e-58	2.04e-57	5.13987	4.70849	5.46616	4.73709	11.4391	11.5978
TGME49_218240	inner membrane complex protein IMC25	IMC25	-4.86	1.01e-39	7.49e-39	14.5435	14.4857	14.489	14.7729	10.0152	9.1883
TGME49_218250	TAP42 family protein	N/A	0.07	0.791	0.82	11.1488	11.5206	10.9912	10.8897	11.4103	11.4286
TGME49_218260	histone H3.3	N/A	-0.94	0.000427	0.000709	17.0997	17.0824	17.4934	17.5472	15.9367	16.3455
TGME49_218270	rhoptry protein ROP48	ROP48	2.41	1.06e-05	1.98e-05	6.59449	6.17818	7.11345	8.30856	8.83308	8.76118
TGME49_218280	mitochondrial import receptor subunit TOM40	TOM40	1.71	0.000219	0.000372	8.82945	8.74306	9.17588	8.07961	10.2778	10.6866
TGME49_218290	WD domain, G-beta repeat-containing protein	N/A	-0.74	0.0558	0.0738	9.87687	9.49016	10.6529	11.3899	8.88215	9.03258
TGME49_218300	zinc finger (CCCH type) motif-containing protein	N/A	-0.4	0.25	0.296	12.2211	12.1296	12.4269	13.1777	11.8376	11.7112
TGME49_218350	hypothetical protein	N/A	6.77	0.0266	0.0366	0	0	0	0	4.57928	4.71558
TGME49_218358	zinc finger protein ZFP1	ZFP1	10.99	2.24e-40	1.71e-39	2.74623	0	2.64086	3.17338	12.04	12.4764
TGME49_218362	zinc finger protein	N/A	1.4	0.294	0.342	9.62636	5.81558	11.2849	12.5206	10.4062	9.772
TGME49_218400	NEK kinase	N/A	-6.3	3.63e-59	5.25e-58	16.9669	16.4449	16.4842	16.9654	10.7236	10.0642
TGME49_218410	ribosomal protein RPP0	RPP0	2.29	1.46e-07	3.1e-07	9.43435	8.8601	8.69602	7.74398	11.4184	11.512
TGME49_218420	pre-mRNA-splicing factor PRP46, putative	N/A	-0.19	0.434	0.485	12.6358	12.7701	12.6082	12.408	12.4496	12.5759
TGME49_218450	hypothetical protein	N/A	-0.09	0.941	0.953	9.96605	6.31205	12.2521	13.4378	9.15888	8.77895
TGME49_218460	hypothetical protein	N/A	-0.41	0.595	0.64	7.38006	4.91498	9.8941	10.7435	6.45175	5.91056
TGME49_218470	protein disulfide-isomerase, putative	N/A	-0.03	0.921	0.936	11.1425	11.432	12.054	12.3591	10.9591	11.5112
TGME49_218490	hypothetical protein	N/A	2.37	3.51e-06	6.76e-06	6.90056	6.98558	6.1639	5.11647	9.56102	8.98285
TGME49_218500	hypothetical protein	N/A	-0.23	0.567	0.614	10.3458	10.6432	10.3206	9.42215	10.1621	10.3694
TGME49_218510	hypothetical protein	N/A	-5.98	4.59e-58	6.36e-57	15.292	15.3892	16.1366	17.003	9.25816	9.45579
TGME49_218520	microneme protein MIC6	MIC6	5.63	4e-81	1.51e-79	10.6474	10.3769	11.0106	10.6814	15.9718	16.3004
TGME49_218530	proteasome-interacting thioredoxin domain-containing protein	N/A	0.1	0.943	0.955	4.3912	2.81453	1.20743	2.53927	3.882	3.90511
TGME49_218540	peptidase S15, putative	N/A	-2.4	0.0653	0.0856	3.93301	4.81543	3.52031	2.89088	2.01938	2.54591
TGME49_218550	PIK3R4 kinase-related protein	N/A	7.07	9.6e-121	1.57e-118	6.50663	6.21771	8.06657	7.89747	13.5219	13.2967
TGME49_218560	acetyl-coA carboxylase ACC2	ACC2	0.87	0.0352	0.0477	10.5601	10.6966	10.0067	10.9495	11.6728	11.2979
TGME49_218570	Nin one binding (NOB1) Zn-ribbon family protein	N/A	1.05	0.000336	0.000564	10.9075	10.6148	10.8169	10.7052	11.6271	11.9933
TGME49_218580	RNA methyltransferase, TrmH family protein	N/A	2.92	0.000423	0.000702	5.89539	3.9147	2.91577	3.7902	8.33404	7.80496
TGME49_218590	protein phosphatase PPM8	PPM8	-3.69	1.82e-41	1.44e-40	14.545	14.3389	14.5124	14.7952	10.8849	10.6201
TGME49_218600	RNA recognition motif-containing protein	N/A	7.14	1.29e-14	3.92e-14	3.63451	0	4.61863	3.7902	9.41376	9.65466
TGME49_218610	ATPase (DUF699) protein	N/A	10.92	0.00107	0.00171	0	0	0	4.09112	8.91447	8.54973
TGME49_218720	calcium-dependent protein kinase CDPK6	CDPK6	6.53	4.08e-86	1.83e-84	6.69729	6.74976	6.42797	6.97884	13.379	13.0908
TGME49_218730	hypothetical protein	N/A	-0.32	0.171	0.21	14.5205	14.5692	15.0103	15.2364	14.1622	14.2781
TGME49_218740	membrane protein, putative	N/A	6.32	8.58e-05	0.000151	6.69729	1.59055	8.10824	8.88957	11.9221	12.1185
TGME49_218750	nucleoside triphosphate hydrolase, putative	N/A	1.86	0.000401	0.000667	10.6176	9.63954	12.0486	13.2954	12.0022	12.1334
TGME49_218760	alpha-soluble NSF attachment protein	alphaSNAP	1.45	9.05e-07	1.82e-06	10.4062	10.2763	10.0519	9.76043	11.6056	11.9505
TGME49_218770	carrier superfamily protein	N/A	-1.17	1.81e-05	3.34e-05	10.6123	10.328	10.5496	10.6658	9.3261	9.28723
TGME49_218780	phosphoserine aminotransferase, putative	N/A	-3.21	1.27e-14	3.84e-14	9.23689	9.67192	9.67361	9.09822	6.46843	6.06917
TGME49_218790	elongation factor G C-terminus domain-containing protein	N/A	1.62	0.00343	0.00522	5.30524	5.59316	6.21565	6.12898	7.21543	6.87887
TGME49_218800	hypothetical protein	N/A	5.41	9.38e-19	3.4e-18	3.63451	3.17737	4.27274	4.82137	8.79391	8.54766
TGME49_218810	histidyl-tRNA synthetase	N/A	0.1	0.876	0.898	6.26026	6.00824	6.49233	5.87664	5.75322	6.60374
TGME49_218820	alba 2	N/A	5.38	2.67e-37	1.83e-36	8.34439	9.42832	8.74086	8.84497	14.2316	14.4934
TGME49_218830	hypothetical protein	N/A	2.83	3.01e-16	9.79e-16	7.0787	7.06359	6.44975	6.19365	9.99802	9.77731
TGME49_218840	mutS domain protein	MSH1	-1.24	0.00291	0.00447	11.3389	10.4811	11.3289	10.8056	9.62473	9.83451
TGME49_218850	ribosomal protein RPS9	RPS9	-2.46	3.85e-11	9.88e-11	11.3309	10.7414	11.7285	11.1704	8.56487	8.65933
TGME49_218860	hypothetical protein	N/A	-5.73	7.38e-51	8.03e-50	13.9551	14.1594	15.1276	16.0057	8.23515	8.41984
TGME49_218870	TBC domain-containing protein TBC3	TBC3	-1.5	0.000448	0.000741	12.7894	12.8329	12.5196	11.4407	11.1294	11.4716
TGME49_218880	striated fiber assemblin SFA3	SFA3	-3.85	3.48e-44	2.99e-43	13.3217	13.1993	14.0443	14.2488	9.5918	9.21987
TGME49_218890	hypothetical protein	N/A	-4.14	2.49e-25	1.15e-24	9.68757	9.02516	11.2504	10.8476	5.23455	5.33113
TGME49_218900	hypothetical protein	N/A	-4.12	5.24e-10	1.27e-09	7.54352	6.89094	7.18009	7.90715	2.82948	3.61974
TGME49_218910	hypothetical protein	N/A	2.67	6.18e-07	1.26e-06	6.05876	6.13753	6.19001	5.41657	8.34988	9.06336
TGME49_218920	proteasome subunit beta type-5, putative	N/A	-0.04	0.869	0.892	12.2577	12.0452	12.2895	12.2344	12.0184	12.2043
TGME49_218930	BTB/POZ domain-containing protein	N/A	-3.25	8.14e-12	2.17e-11	10.2098	10.7456	10.0448	8.98401	7.11835	7.38513
TGME49_218940	ATP synthase-associated protein	ICAP8	1.24	0.00669	0.00984	8.51171	9.53974	8.62603	8.98858	10.1894	10.5037
TGME49_218950	hypothetical protein	N/A	-0.27	0.523	0.573	9.72212	8.86633	9.88013	9.51681	9.05916	9.11883
TGME49_218955	hypothetical protein	N/A	-4.86	1.46e-26	7.06e-26	10.6189	11.0383	12.557	13.6502	5.88332	6.12582
TGME49_218960	AP2 domain transcription factor AP2XII-1	AP2XII1	-2.28	4.01e-09	9.31e-09	13.4331	13.188	13.4687	13.9082	11.3839	10.571
TGME49_219070	cyclic nucleotide-binding domain-containing protein	N/A	5.83	1.95e-41	1.54e-40	7.53244	6.87866	9.09875	9.98487	13.1448	12.9647
TGME49_219080	Golgi to ER traffic protein GET4, putative	N/A	-1.96	1.6e-14	4.83e-14	13.0631	13.1131	13.0713	12.7509	11.0929	11.1694
TGME49_219090	hypothetical protein	N/A	-3.58	0.0141	0.02	4.57522	3.32946	5.13096	4.2209	0.593608	1.65581
TGME49_219100	cyclin-dependent kinase regulatory subunit protein	N/A	-5.45	4.2e-84	1.74e-82	15.0513	15.2142	15.3351	14.9483	9.79228	9.5806
TGME49_219110	hypothetical protein	N/A	-6.08	1.12e-140	3.29e-138	15.7294	15.8301	16.7112	16.9672	9.69109	9.70758
TGME49_219120	zinc finger (CCCH type) motif-containing protein	N/A	4.59	1.99e-35	1.28e-34	7.09385	6.34812	8.17511	8.07961	11.2823	11.3878
TGME49_219130	NADPH-glutathione reductase	N/A	7.34	2.68e-36	1.78e-35	5.92958	4.53157	7.94153	9.12748	12.5799	12.7794
TGME49_219140	EF-1 guanine nucleotide exchange domain-containing protein	N/A	1.45	7.46e-06	1.41e-05	11.8768	12.2836	11.706	11.3907	13.3248	13.7302
TGME49_219150	zinc finger, zz type domain-containing protein	N/A	4.06	1.51e-40	1.16e-39	8.26628	8.00834	8.18163	8.59259	12.2532	12.1472
TGME49_219160	hypothetical protein	N/A	-5.88	1.3e-60	2.03e-59	16.3628	16.4138	17.1483	17.9731	10.4604	10.5608
TGME49_219170	IMC sutures component ISC2	ISC2	6.88	3.71e-32	2.14e-31	4.18022	4.9623	3.94503	5.57062	11.2358	11.6639
TGME49_219180	acetyltransferase, GNAT family protein	N/A	0.54	0.249	0.295	7.1957	7.68076	7.24379	7.26124	7.65501	8.28208
TGME49_219190	nuclear movement protein domain containing protein	N/A	-1.43	6.14e-09	1.41e-08	14.2259	14.4804	14.774	14.7384	12.8382	13.01
TGME49_219200	DEAD/DEAH box RNA helicase family protein	N/A	4.44	9.42e-21	3.68e-20	8.29934	8.18327	7.86257	6.57976	12.408	12.9011
TGME49_219210	ankyrin repeat-containing protein	N/A	7.72	5.07e-51	5.54e-50	3.25768	4.53157	0	0	11.6067	11.8126
TGME49_219230	AMP-binding enzyme domain-containing protein	N/A	-2.55	4.02e-14	1.19e-13	16.4884	16.2934	16.5026	15.7965	13.7929	13.8956
TGME49_219240	Peptidyl-tRNA hydrolase PTH2 domain-containing protein	N/A	4.89	1.39e-25	6.46e-25	6.46061	5.62291	5.87301	5.18169	10.724	11.1555
TGME49_219250	acetyltransferase, GNAT family protein	N/A	3.13	9.38e-27	4.55e-26	10.5737	11.048	11.2582	11.4515	13.9312	13.9831
TGME49_219260	cation-transporting ATPase, putative	N/A	0.42	0.187	0.228	9.51537	9.63041	9.15946	9.61453	10.0412	9.937
TGME49_219270	glideosome-associated protein with multiple-membrane spans GAPM2A	GAPM2A	-3.52	1.8e-36	1.2e-35	13.7414	13.7515	14.501	14.7666	10.4051	10.0253
TGME49_219280	actin like protein ALP1	ALP1	0.04	0.9	0.919	12.8967	12.661	12.789	12.3202	12.7845	12.8557
TGME49_219290	F-actin-capping protein subunit beta, putative	N/A	0.63	0.0483	0.0644	10.2046	10.1492	9.75674	9.22739	10.7162	10.8941
TGME49_219300	ran binding protein	N/A	-1.17	0.0151	0.0213	8.75037	8.86633	7.69037	6.69594	7.77386	7.50955
TGME49_219310	DnaK family protein	N/A	1.33	0.000553	0.000909	8.08098	8.43461	7.2807	6.71809	9.69552	9.50253
TGME49_219320	gliding-associated protein GAP50	GAP50	5.23	1.78e-24	7.99e-24	7.27761	6.13753	8.08059	9.01566	12.0623	11.9838
TGME49_219348	SAG-related sequence SRS55M	SRS55M	0.8	0.567	0.614	4.65912	0	6.68821	8.20256	4.11174	4.71558
TGME49_219370	hypothetical protein	N/A	-0.14	0.764	0.797	8.1766	8.27981	7.43056	6.57976	8.04249	8.14354
TGME49_219430	tRNA ligase class II core domain (G, H, P, S and T) domain-containing protein	N/A	3	1.93e-11	5.04e-11	7.18158	6.34812	6.13732	5.99023	9.9334	9.65466
TGME49_219440	hypothetical protein	N/A	0.31	0.385	0.436	9.85703	9.65941	8.10137	8.52508	10.2925	9.81052
TGME49_219450	WD domain, G-beta repeat-containing protein	N/A	-0.17	0.784	0.814	6.46061	5.84111	6.65111	6.94167	5.5951	6.33248
TGME49_219460	hypothetical protein	N/A	-4.71	2.01e-50	2.14e-49	13.7604	13.8039	12.8425	13.4336	9.16016	8.98438
TGME49_219485	peptidase, putative	N/A	-1.05	0.0541	0.0717	7.40458	7.84122	6.72439	7.52271	6.32924	6.82515
TGME49_219500	hypothetical protein	N/A	0.13	0.852	0.877	7.90314	9.2728	8.47496	10.2606	8.64594	9.07635
TGME49_219510	GTP binding protein 7 isoform 2 family protein, putative	N/A	3.96	0.00399	0.00602	1.94666	2.00628	0	1.3809	5.23455	5.8035
TGME49_219520	histone arginine methyltransferase PRMT1	PRMT1	3.28	1.55e-12	4.28e-12	7.45239	7.96253	7.09975	8.17879	11.013	10.9895
TGME49_219530	hypothetical protein	N/A	7.7	0.00128	0.00204	0	0	0	0	5.66913	5.4244
TGME49_219540	cytosolic tRNA-Ala synthetase	N/A	7.08	7.55e-24	3.32e-23	3.0245	2.00628	1.8554	1.3809	9.42235	9.27976
TGME49_219550	dihydrolipoyllysine-residue succinyltransferase component of oxoglutarate dehydrogenase	N/A	1.33	3.92e-08	8.55e-08	12.2552	12.183	12.5073	12.6003	13.4229	13.6622
TGME49_219570	hypothetical protein	N/A	2.14	5.93e-11	1.51e-10	8.39421	8.41349	8.6403	8.80929	10.2931	10.7443
TGME49_219590	RuvB family 1 protein	N/A	0.11	0.763	0.795	10.05	10.2056	9.87813	9.16828	10.1092	10.3623
TGME49_219600	hypothetical protein	N/A	5.55	3.6e-50	3.8e-49	5.67127	5.33009	4.27274	3.7902	11.0415	11.0054
TGME49_219610	hypothetical protein	N/A	-4.63	2.31e-61	3.75e-60	15.9645	16.3672	16.8128	17.0556	11.5048	11.5911
TGME49_219620	hypothetical protein	N/A	1.57	4.85e-07	9.95e-07	10.9807	10.964	11.1409	10.5777	12.454	12.6279
TGME49_219630	flavodoxin domain-containing protein	N/A	1.8	5.61e-05	9.99e-05	9.94948	10.8309	10.1432	10.9163	12.3778	12.1286
TGME49_219640	RING zinc finger protein	N/A	-0.53	0.0951	0.121	12.4115	12.279	12.2993	11.9171	12.0356	11.5484
TGME49_219650	transporter, small conductance mechanosensitive ion channel (MscS) family protein	N/A	1.22	0.00581	0.0086	11.082	10.5943	10.9121	9.8434	12.1132	12.0376
TGME49_219660	hypothetical protein	N/A	0.09	0.94	0.953	4.0619	3.00733	4.83261	4.82137	4.06863	3.18051
TGME49_219670	zinc finger (CCCH type) motif-containing protein	N/A	0.36	0.566	0.613	12.444	10.7278	14.3812	15.6294	12.3637	11.9911
TGME49_219678	hypothetical protein	N/A	-0.43	0.206	0.248	8.82945	8.60826	7.83801	7.87792	8.39639	8.18679
TGME49_219682	pyruvate dehydrogenase kinase, putative	N/A	-2.38	1.66e-14	5e-14	13.7855	13.595	14.0589	13.5165	11.4038	11.2164
TGME49_219690	hypothetical protein	N/A	-1.37	0.00154	0.00244	17.8577	17.8733	17.7818	16.6405	16.3149	16.6489
TGME49_219700	DNA replication licensing factor MCM4, putative	N/A	0.29	0.46	0.511	9.09347	8.67724	8.19459	7.70014	8.99007	9.36929
TGME49_219710	hypothetical protein	N/A	-0.32	0.569	0.615	9.99055	10.754	9.56059	10.9541	10.3284	9.84552
TGME49_219720	ras-related protein RAB5C	RAB5C	-4.37	2.16e-61	3.52e-60	15.5642	15.3335	15.988	16.0596	11.2377	10.9175
TGME49_219730	hypothetical protein	N/A	3.81	2.25e-14	6.73e-14	10.2594	11.3593	10.8531	11.7843	14.5404	14.8837
TGME49_219738	armadillo repeat-containing protein	N/A	-0.78	0.0132	0.0187	9.04751	8.92423	8.34739	8.54381	8.24244	8.16803
TGME49_219742	hypothetical protein	N/A	-2.13	0.0219	0.0303	5.40581	6.54744	6.1639	5.11647	3.34515	4.4925
TGME49_219750	cytochrome c, putative	N/A	3.51	2.35e-17	8.05e-17	9.78882	10.3692	10.1664	10.946	13.384	13.8241
TGME49_219760	N-acetyltransferase family protein	N/A	1.05	0.00862	0.0125	9.61064	9.16064	9.45421	8.75139	10.282	10.6068
TGME49_219770	30S ribosomal protein S12, putative	N/A	6.03	1.51e-14	4.55e-14	5.67127	4.09534	4.53962	1.3809	10.9402	11.1744
TGME49_219790	pre-mRNA processing factor PRP3	N/A	4.04	1.84e-40	1.41e-39	7.26428	7.19814	6.38342	6.71809	11.227	11.2911
TGME49_219800	vacuolar ATP synthase subunit b, putative	N/A	5.16	1.24e-62	2.13e-61	6.93463	6.99699	6.8928	7.34904	12.1296	12.1008
TGME49_219810	dense granule protein GRA40	GRA40	7.59	1.19e-36	8e-36	5.01805	3.32946	4.45603	4.09112	12.2239	11.4534
TGME49_219820	polyubiquitin UbC, putative	N/A	0.5	0.215	0.258	15.5291	15.4028	16.1554	17.0175	15.6474	16.2326
TGME49_219828	HMG (high mobility group) box domain-containing protein	N/A	0.02	0.961	0.97	10.6449	9.90772	12.1992	13.1464	10.3152	10.3723
TGME49_219850	prolyl-tRNA synthetase (ProRS)	N/A	3.69	2.91e-16	9.49e-16	6.17733	6.13753	5.90489	4.90099	9.75367	9.89769
TGME49_219860	DNA replication licensing factor MCM6, putative	MCM6	1.62	7.73e-05	0.000136	8.14785	7.57057	7.37475	6.86431	9.5226	9.4864
TGME49_220025	hypothetical protein	N/A	-6.26	2.18e-112	2.59e-110	16.2092	16.1334	16.8015	17.1651	10.0474	9.76933
TGME49_220070	hypothetical protein	N/A	7.31	1.16e-10	2.9e-10	2.40114	0	0	0	8.24002	8.22359
TGME49_220080	Toxoplasma gondii family C protein	N/A	5.23	2.47e-12	6.73e-12	3.93301	2.59194	1.20743	2.53927	8.49739	8.40619
TGME49_220090	DIX domain-containing protein	N/A	-1.74	4.03e-10	9.84e-10	13.7086	13.963	14.0705	14.1439	11.9073	12.2804
TGME49_220100	phosphoribosylpyrophosphate synthetase	N/A	6.24	1.98e-41	1.56e-40	5.01805	4.9623	3.14658	4.64758	11.0575	11.3025
TGME49_220110	hypothetical protein	N/A	-2.43	2.11e-11	5.49e-11	12.7234	12.1434	12.6298	12.8778	10.2731	9.73606
TGME49_220120	AP-5 complex subunit sigma, putative	N/A	4.55	9.4e-35	5.89e-34	6.14859	6.68071	4.69354	4.33997	10.997	10.9614
TGME49_220132	hypothetical protein	N/A	-0.99	0.0722	0.0939	8.33804	7.33924	7.56631	8.27906	6.95631	6.91146
TGME49_220140	EF hand domain-containing protein	N/A	-0.22	0.581	0.626	8.89148	9.57251	8.86758	8.52508	9.03975	9.07491
TGME49_220145	hypothetical protein	N/A	-2.21	0.625	0.668	3.0245	0	2.30094	0	1.33745	0
TGME49_220150	50S ribosomal protein L16, putative	N/A	-3.19	3.03e-24	1.35e-23	13.8455	13.9471	13.9022	13.3174	10.6154	10.7971
TGME49_220160	ATG18/WIPI-like protein PROP2	PROP2	2.05	3.36e-06	6.49e-06	7.13838	6.87866	6.1639	5.52107	9.21803	8.87627
TGME49_220170	coiled-coil domain-containing protein	N/A	6.49	8.74e-70	2.06e-68	5.74991	6.17818	5.07603	5.57062	12.2764	12.6174
TGME49_220175	hypothetical protein	N/A	5.83	7.56e-36	4.96e-35	4.18022	5.05251	4.17156	4.64758	10.576	10.3857
TGME49_220180	hypothetical protein	N/A	2.15	0.000614	0.001	6.02754	5.29356	3.81687	4.82137	7.87116	7.784
TGME49_220190	hypothetical protein	N/A	1.47	0.0558	0.0738	6.43703	5.43444	3.67619	5.04816	7.78389	7.05839
TGME49_220200	hypothetical protein	N/A	3.5	1.86e-07	3.91e-07	7.59768	7.42617	5.99649	3.40951	10.8006	11.1874
TGME49_220208	hypothetical protein	N/A	-1.24	0.00986	0.0142	8.36951	7.79624	6.5739	6.42674	7.08087	6.6353
TGME49_220212	pseudouridine synthase	N/A	8.72	5.29e-07	1.08e-06	1.27942	0	3.81687	0	8.08908	7.91834
TGME49_220230	leucine rich repeat-containing protein	N/A	1.98	1.53e-08	3.42e-08	8.89148	8.82534	7.44147	7.70014	11.0956	10.5307
TGME49_220240	dense granule protein GRA31	GRA31	12.08	0.000286	0.000482	0	0	0	4.09112	9.91754	9.88379
TGME49_220250	Nucleotide-sensitive chloride conductance regulator (ICln) protein	N/A	2.3	1.91e-07	4.01e-07	9.15978	8.40923	9.04969	8.22594	11.1567	11.1078
TGME49_220260	hypothetical protein	N/A	2.04	0.0066	0.00972	4.18022	4.70849	5.13096	4.44996	6.34739	6.57147
TGME49_220270	alveolin domain containing intermediate filament IMC6	IMC6	3.82	2.45e-06	4.77e-06	6.5291	4.17783	7.83801	9.37064	9.53552	9.59672
TGME49_220280	mucin family glycoprotein	N/A	4.38	6.21e-09	1.42e-08	8.70174	6.05264	10.1382	11.1172	12.3039	12.2707
TGME49_220290	hypothetical protein	N/A	0.08	0.932	0.945	5.74991	3.9147	4.83261	5.52107	4.93182	5.38781
TGME49_220300	ribosomal protein L15 protein	N/A	5.98	0.000382	0.000637	4.57522	3.70817	4.83261	0	10.1919	10.0005
TGME49_220310	hypothetical protein	N/A	1.75	0.0403	0.0542	3.93301	4.9623	3.94503	3.94849	5.89571	6.53847
TGME49_220320	BSD domain-containing protein	N/A	3.5	1.41e-15	4.46e-15	6.96791	6.76318	5.62768	4.44996	10.321	10.3869
TGME49_220330	hypothetical protein	N/A	9.76	1.8e-17	6.18e-17	1.94666	0	4.17156	2.89088	10.3106	9.71221
TGME49_220340	transporter, putative	N/A	6.23	0.00196	0.00306	1.27942	0	4.27274	1.3809	5.7935	5.31172
TGME49_220350	tRNA ligases class II (D, K and N) domain-containing protein	N/A	10.83	5.5e-22	2.26e-21	0	1.59055	3.34551	2.07335	11.2975	10.7484
TGME49_220360	FAD binding domain-containing protein	N/A	-3.8	2.27e-32	1.32e-31	14.3179	14.3159	13.7555	14.2626	10.7136	10.3021
TGME49_220370	hypothetical protein	N/A	4.78	5.36e-39	3.89e-38	5.89539	6.31205	7.01466	7.45836	10.9293	10.8498
TGME49_220380	hypothetical protein	N/A	1.89	2.68e-12	7.29e-12	11.6093	11.2148	12.0221	12.1216	13.3248	13.302
TGME49_220390	hypothetical protein	N/A	0.67	0.0173	0.0242	12.3458	12.2257	13.1126	13.5657	12.9375	12.978
TGME49_220400	actin depolymerizing factor ADF	ADF	2.78	7.2e-10	1.74e-09	14.0763	15.0688	14.5348	15.2204	17.238	17.6057
TGME49_220420	3'5'-cyclic nucleotide phosphodiesterase PDE5	PDE5	0.04	0.921	0.936	10.1871	9.46984	11.3	12.1314	9.99514	9.8294
TGME49_220430	hypothetical protein	N/A	-2.03	4.7e-09	1.09e-08	12.1768	11.9691	11.6401	11.4172	10.3415	9.66712
TGME49_220440	cyclin-dependent kinase regulatory subunit protein	N/A	-4.22	6.02e-42	4.85e-41	10.0827	9.88641	10.675	10.9103	5.89571	5.67273
TGME49_220450	ribonuclease HI protein	N/A	7.02	0.00129	0.00206	0	0	1.8554	1.3809	4.57928	5.14633
TGME49_220460	SNF7 family protein	N/A	-3.13	4.5e-26	2.14e-25	16.2811	15.9734	17.0901	17.2721	12.7849	13.2053
TGME49_220470	hypothetical protein	N/A	1.66	0.000319	0.000535	9.95986	10.6166	9.77626	10.8464	12.0457	11.9258
TGME49_220480	hypothetical protein	N/A	-3.1	6.56e-10	1.58e-09	11.1588	11.0805	10.4369	11.3	8.47692	7.35227
TGME49_220490	pre-rRNA-processing protein PNO1, putative	N/A	7.06	8.42e-50	8.77e-49	4.0619	4.53157	4.83261	5.75334	11.191	11.4479
TGME49_220500	UBX domain-containing protein	N/A	-1.26	3.11e-06	6.03e-06	14.6472	14.7832	14.8693	14.487	13.3755	13.5258
TGME49_220510	hypothetical protein	N/A	4.34	3.16e-51	3.46e-50	8.67176	8.87563	9.16276	9.28047	12.9138	13.2848
TGME49_220520	hypothetical protein	N/A	1.09	0.0606	0.0798	9.3485	10.1543	9.20498	10.5792	11.2407	10.4386
TGME49_220525	hypothetical protein	N/A	1.18	0.155	0.191	5.3564	6.51607	5.13096	6.82403	7.53344	6.81829
TGME49_220530	AP2 domain transcription factor AP2V-1	AP2V1	2.63	1.27e-05	2.36e-05	8.23928	9.27514	8.26382	9.8434	11.5982	11.338
TGME49_220540	hypothetical protein	N/A	-0.77	0.0644	0.0845	12.5308	11.6327	12.7882	12.6287	11.6322	11.0876
TGME49_220560	transmembrane protein TauE, putative	N/A	-1	0.0655	0.0858	9.1883	9.98421	9.42152	10.4177	8.17798	8.99961
TGME49_220570	zinc finger protein, putative	N/A	0.38	0.123	0.154	11.5933	11.5475	11.1434	10.9079	11.9589	11.9353
TGME49_220585	hypothetical protein	N/A	5.41	0.118	0.148	0	0	1.20743	0	3.66759	2.99833
TGME49_220600	apicomplexan amino acid transporter ApiAT3-3	ApiAT3-3	-0.76	0.0026	0.004	12.4675	12.6175	12.429	12.6892	11.8378	11.7211
TGME49_220610	protein phosphatase PPM9	PPM9	4.34	0.0021	0.00327	2.74623	3.70817	0	5.04816	7.16515	7.79102
TGME49_220630	hypothetical protein	N/A	8.11	1.58e-07	3.34e-07	5.78768	1.59055	6.99998	8.97484	12.9239	12.901
TGME49_220640	hypothetical protein	N/A	7.35	1.37e-50	1.48e-49	4.73841	4.53157	6.81105	7.89747	11.9993	11.8496
TGME49_220650	hypothetical protein	N/A	2.58	0.00556	0.00825	5.54464	2.81453	7.82141	9.51681	7.24961	7.27423
TGME49_220720	hypothetical protein	N/A	0.52	0.674	0.713	4.65912	5.13742	1.20743	4.33997	5.57983	5.2519
TGME49_220740	hypothetical protein	N/A	4.01	0.0171	0.024	3.0245	1.00419	0	3.61237	6.34739	5.59461
TGME49_220840	threonine synthase	N/A	-5.18	9.73e-97	6.81e-95	14.9541	15.1718	15.3139	15.5262	9.9236	9.8472
TGME49_220850	hypothetical protein	N/A	3.02	0.509	0.559	0	0	1.8554	2.53927	2.19002	0
TGME49_220860	DEAD/DEAH box helicase	N/A	-0.35	0.279	0.327	12.3596	12.567	12.6631	13.276	12.1104	12.1284
TGME49_220870	hypothetical protein	N/A	2.19	2.31e-11	6e-11	9.22317	9.60641	9.73252	9.30629	11.5098	11.725
TGME49_220880	dynactin subunit 3, putative	N/A	-2.32	8.54e-22	3.5e-21	14.2233	14.283	14.949	15.0995	11.8078	12.0435
TGME49_220890	dense granule protein GRA12A	GRA12A	6.64	4.65e-23	2e-22	6.14859	7.3212	5.70214	7.77601	13.4083	13.5457
TGME49_220900	apical cap protein AC13	AC13	3.32	2.78e-05	5.08e-05	8.60985	6.07434	9.98637	11.4087	11.3935	10.8598
TGME49_220910	HEAT repeat-containing protein	N/A	0.74	0.0211	0.0293	10.8214	10.6368	9.3909	9.2351	11.7134	11.1814
TGME49_220920	hypothetical protein	N/A	-3.09	2.5e-13	7.16e-13	11.7269	11.2949	10.7127	11.0214	8.82663	7.91513
TGME49_220930	IMC sutures component ISC3	ISC3	-4.69	7.48e-59	1.06e-57	12.5291	12.4609	12.8527	12.9454	8.0285	7.55151
TGME49_220940	ribosomal RNA methyltransferase (FtsJ) family protein	N/A	1.1	0.00183	0.00287	8.01085	8.19817	8.30621	8.48688	8.9944	9.39141
TGME49_220950	hypothetical protein	N/A	3.25	4.03e-13	1.15e-12	7.76796	7.7498	8.79289	7.6777	11.0443	10.9633
TGME49_221160	acetyltransferase, GNAT family protein	N/A	0.15	0.573	0.618	12.0921	12.0758	11.7173	11.4231	12.1394	12.3158
TGME49_221170	CAAX metallo endopeptidase	N/A	-3.82	1.68e-25	7.81e-25	11.7227	11.902	11.7906	11.008	7.98278	8.01148
TGME49_221180	hypothetical protein	N/A	7.98	1.8e-105	1.76e-103	8.15509	7.65938	8.65443	9.33882	15.97	15.832
TGME49_221190	mrna cleavage factor family protein, putative	N/A	4.64	1.7e-46	1.59e-45	6.8479	6.6082	6.19001	5.79563	11.3833	11.326
TGME49_221200	CW-type Zinc Finger protein	N/A	-0.65	0.0998	0.127	8.96337	9.11949	7.54624	7.95457	8.6349	8.09613
TGME49_221210	cyclophilin	N/A	-2.76	1.61e-19	6.04e-19	12.0011	12.4127	11.8885	11.5923	9.36448	9.56225
TGME49_221220	hypothetical protein	N/A	0.72	0.375	0.426	6.41307	6.21771	5.90489	4.64758	6.08068	7.5963
TGME49_221230	protein tyrosine phosphatase, putative	N/A	-2.49	1.66e-30	9.06e-30	13.7081	13.6863	14.0318	14.085	11.1736	11.248
TGME49_221250	hypothetical protein	N/A	1.16	0.0697	0.0908	7.68032	6.46771	8.86758	9.94081	8.74169	7.81533
TGME49_221260	Class-II DAHP synthetase family protein	N/A	-0.93	0.00455	0.00682	9.60536	9.96401	9.47824	9.20404	8.96971	8.76297
TGME49_221265	hypothetical protein	N/A	-4.34	5.44e-08	1.18e-07	8.45415	10.0541	8.732	10.6268	4.48405	5.62637
TGME49_221270	oxidoreductase, 2OG-Fe(II) oxygenase family protein	N/A	-2.54	4.22e-16	1.36e-15	12.3681	12.6677	13.0285	13.313	9.75877	10.1917
TGME49_221275	hypothetical protein	N/A	0.19	0.886	0.906	2.74623	3.70817	3.52031	3.40951	3.27102	3.68151
[truncated: 6,552 more rows]

## Sheet: 2.4
ToxoDB ID Release 68	Product description	Gene name	LFC	p-value	Adjusted p-value	Unsporulated oocysts Sample 1	Unsporulated oocysts Sample 2	Sporulating oocysts Sample 1	Sporulating oocysts Sample 2	Sporulated oocysts Sample 1	Sporulated oocysts Sample 2
[truncated: 7,974 more rows]

[truncated: 3 more sheets: 2.5, 2.6, 2.7]
