# Supplementary material for: Genome-wide Transcriptomic Analysis of Toxoplasma gondii Reveals Stage-specific Regulatory Programs and Metabolic Adaptations Driving Oocyst Sporulation
Source: bioRxiv preprint, doi:10.1101/2025.09.10.674405, version 1 (2025-09-11)
Supplement: Supplemental Table 4 [file 674405_file23.xlsx]

## Sheet: Contents
	Blast2GO and EggNOG annotations of hypothetical proteins
5.1	Annotations (TPA: third party annotation) and statistical values

## Sheet: 5.1
ToxoDB ID Release 68	Tags	Blast2GO description	Protein length (aa)	# Hits	e-value (Blast)	Mean similarity (%)	# GO	GO IDs	GO Names	Enzyme Codes	Enzyme Names	InterPro IDs	InterPro GO IDs	InterPro GO Names	EggNOG tags	EggNOG Description	e-value (EggNOG)	Best Tax-Level	EC Codes	# GO	GOs	GO Names	KEGG KO	KEGG Pathway
TGME49_200110	[INTERPRO, BLASTED]	hypothetical protein TGME49_200110	125	20	2.03368e-87	92.01						no IPS match	no IPS match	no IPS match
TGME49_200260	[INTERPRO, BLASTED]	hypothetical protein TGME49_200260	127	1	3.0797e-77	100						no IPS match	no IPS match	no IPS match
TGME49_200310	[INTERPRO, BLASTED, MAPPED, ANNOTATED]	putative transmembrane protein	93	6	9.72472e-17	94.8	1	C:GO:0016020	C:membrane			no IPS match	no IPS match	no IPS match	ENOG		5.4e-46	Sarcocystidae		0
TGME49_200340	[INTERPRO, BLASTED]	KIAA1430-like protein-domain-containing protein	259	20	0	66.89						IPR029488 (PFAM); IPR038792 (PANTHER)	no GO terms	no GO terms	ENOG	KIAA1430 homologue	1.2e-148	Sarcocystidae		0
TGME49_200360	[INTERPRO, BLASTED, MAPPED]	hypothetical protein TGME49_200360	186	6	8.5586e-119	83.1	1	C:GO:0016020	C:membrane			no IPS match	no IPS match	no IPS match	ENOG		6.7e-96	Sarcocystidae		0
TGME49_200410	[INTERPRO, BLASTED]	hypothetical protein TGME49_200410	927	12	0	97.86						cd14686 (CDD)	no GO terms	no GO terms	ENOG		0	Sarcocystidae		0
TGME49_200440	[INTERPRO, BLASTED, MAPPED, ANNOTATED]	putative transmembrane protein	958	14	0	89.93	1	C:GO:0016020	C:membrane			no IPS match	no IPS match	no IPS match	ENOG		0	Sarcocystidae		0
TGME49_200450	[INTERPRO, BLASTED]	hypothetical protein TGME49_200450	1317	14	0	91.75						no IPS match	no IPS match	no IPS match	ENOG		7.1e-301	Sarcocystidae		0
TGME49_200460	[INTERPRO, BLASTED, MAPPED]	hypothetical protein TGME49_200460	436	18	0	73.19	2	F:GO:0000976; C:GO:0005634	F:transcription cis-regulatory region binding; C:nucleus			no IPS match	no IPS match	no IPS match	ENOG		1.5e-247	Sarcocystidae		0
TGME49_200470	[INTERPRO, BLASTED]	secondary thiamine-phosphate synthase enzyme	616	20	0	76.93						IPR035917 (G3DSA:2.60.120.GENE3D); IPR001602 (PFAM); IPR035917 (G3DSA:2.60.120.GENE3D); IPR001602 (PANTHER); IPR035917 (SUPERFAMILY); IPR035917 (SUPERFAMILY)	no GO terms	no GO terms	COG,KOG,ENOG	Uncharacterised protein family UPF0047	0	Sarcocystidae		0
TGME49_200595	[INTERPRO, BLASTED]	hypothetical protein TGME49_200595	126	4	1.61382e-72	100						no IPS match	no IPS match	no IPS match
TGME49_200600	[INTERPRO, BLASTED]	hypothetical protein TGGT1_200600	141	13	6.05945e-99	84.96						no IPS match	no IPS match	no IPS match	ENOG		5.5e-50	Sarcocystidae		0
TGME49_201100	[INTERPRO, BLASTED]	hypothetical protein TGRH88_037590	229	20	5.73251e-39	99.75						no IPS match	no IPS match	no IPS match	ENOG	heart development	2.2e-40	Sarcocystidae		0
TGME49_201110	[INTERPRO, BLASTED, MAPPED, ANNOTATED]	putative transmembrane protein	82	20	6.96925e-26	79	1	C:GO:0016020	C:membrane			no IPS match	no IPS match	no IPS match	ENOG		4.5e-36	Sarcocystidae		0
TGME49_201140	[INTERPRO, BLASTED, MAPPED, ANNOTATED]	TPA: proline rich protein, putative	1051	18	0	92.83	2	F:GO:0003723; C:GO:0005634	F:RNA binding; C:nucleus			no IPS match	no IPS match	no IPS match	ENOG		0	Sarcocystidae		0
TGME49_201160	[INTERPRO, BLASTED]	hypothetical protein TGME49_201160	189	6	7.44712e-136	99.38						no IPS match	no IPS match	no IPS match
TGME49_201170	[INTERPRO, BLASTED]	hypothetical protein TGME49_201170	126	5	2.37935e-89	89.73						no IPS match	no IPS match	no IPS match	ENOG		3.6e-69	Sarcocystidae		0
TGME49_201210	[INTERPRO, BLASTED, MAPPED, ANNOTATED]	AF4/FMR2 family member 4-like	709	17	0	89.21	2	P:GO:0033615; C:GO:0005739	P:mitochondrial proton-transporting ATP synthase complex assembly; C:mitochondrion			IPR042272 (G3DSA:3.30.2180.GENE3D); IPR023335 (G3DSA:1.10.3580.GENE3D); IPR011419 (PANTHER); SSF160909 (SUPERFAMILY); SSF160909 (SUPERFAMILY)	P:GO:0033615; P:GO:0043461; C:GO:0005739	P:mitochondrial proton-transporting ATP synthase complex assembly; P:proton-transporting ATP synthase complex assembly; C:mitochondrion	ENOG		3.3e-268	Sarcocystidae		0
TGME49_201240	[INTERPRO, BLASTED]	proteophosphoglycan 5, related protein	631	11	0	92.14						no IPS match	no IPS match	no IPS match	ENOG		1.1e-267	Sarcocystidae		0
TGME49_201270	[INTERPRO, BLASTED, MAPPED]	hypothetical protein TGME49_201270	964	15	0	89.58	1	C:GO:0016020	C:membrane			no IPS match	no IPS match	no IPS match	ENOG		0	Sarcocystidae		0
TGME49_201390	[INTERPRO, BLASTED, MAPPED, ANNOTATED]	putative transmembrane protein	108	9	2.04603e-32	96	1	C:GO:0016020	C:membrane			no IPS match	no IPS match	no IPS match	ENOG		2.5e-50	Sarcocystidae		0
TGME49_201660	[INTERPRO, BLASTED]	hypothetical protein TGCOUG_201660	588	9	0	87.9						no IPS match	no IPS match	no IPS match	ENOG		1.9e-290	Sarcocystidae		0
TGME49_201730	[INTERPRO, BLASTED]	hypothetical protein TGME49_201730	206	10	6.7462e-87	98.88						no IPS match	no IPS match	no IPS match	ENOG		1.3e-105	Sarcocystidae		0
TGME49_201740	[INTERPRO, BLASTED]	hypothetical protein TGME49_201740	440	10	0	86.01						no IPS match	no IPS match	no IPS match	ENOG		6.6e-195	Sarcocystidae		0
TGME49_201775	[INTERPRO, BLASTED]	hypothetical protein TGME49_201775	93	5	1.81388e-62	99.14						no IPS match	no IPS match	no IPS match
TGME49_201785	[INTERPRO, BLASTED]	hypothetical protein TGME49_201785	132	5	4.02964e-93	98.94						no IPS match	no IPS match	no IPS match
TGME49_201810	[INTERPRO, BLASTED]	hypothetical protein TGME49_201810	342	11	0	99.15						no IPS match	no IPS match	no IPS match	ENOG		2.5e-173	Sarcocystidae		0
TGME49_201820	[INTERPRO, BLASTED]	AT hook motif-containing protein, putative	2625	20	0	91.94						no IPS match	no IPS match	no IPS match	ENOG	Encoded by	0	Sarcocystidae		0
TGME49_201860	[INTERPRO, BLASTED]	putative transmembrane protein	157	6	4.69647e-66	86.51						no IPS match	no IPS match	no IPS match	ENOG		3.9e-49	Sarcocystidae		0
TGME49_201900	[INTERPRO, BLASTED]	hypothetical protein TGME49_201900	838	20	0	94.78						no IPS match	no IPS match	no IPS match	ENOG		0	Sarcocystidae		0
TGME49_202010	[INTERPRO, BLASTED, MAPPED]	hypothetical protein TGME49_202010	857	14	0	87.79	1	C:GO:0016020	C:membrane			no IPS match	no IPS match	no IPS match	ENOG		0	Sarcocystidae		0
TGME49_202040	[INTERPRO, BLASTED]	hypothetical protein TGME49_202040	1047	20	0	76.36						no IPS match	no IPS match	no IPS match	ENOG		0	Sarcocystidae		0
TGME49_202050	[INTERPRO, BLASTED, MAPPED, ANNOTATED]	putative transmembrane protein	392	6	0	81.7	1	C:GO:0016020	C:membrane			no IPS match	no IPS match	no IPS match	ENOG		1.1e-206	Sarcocystidae		0
TGME49_202065	[INTERPRO, BLASTED]	hypothetical protein TGME49_202065	125	6	4.5563e-76	99.47						no IPS match	no IPS match	no IPS match
TGME49_202070	[INTERPRO, BLASTED]	hypothetical protein TGME49_202070	7892	20	0	99.03						PTHR35478 (PANTHER)	no GO terms	no GO terms	ENOG		0	Sarcocystidae		0
TGME49_202080	[INTERPRO, BLASTED, MAPPED, ANNOTATED]	hypothetical protein TGME49_202080	1293	19	0	93.28	1	F:GO:0003729	F:mRNA binding			no IPS match	no IPS match	no IPS match	ENOG		0	Sarcocystidae		0
TGME49_202090	[INTERPRO, BLASTED]	hypothetical protein TGME49_202090	198	9	5.49766e-139	90.81						no IPS match	no IPS match	no IPS match	ENOG		1.4e-99	Sarcocystidae		0
TGME49_202100	[INTERPRO, BLASTED]	TPA: hypothetical protein BN1205_047450	144	8	3.61668e-77	90.02						no IPS match	no IPS match	no IPS match	ENOG		9.8e-71	Sarcocystidae		0
TGME49_202110	[INTERPRO, BLASTED]	hypothetical protein TGRUB_202110	279	14	4.86729e-70	94.16						no IPS match	no IPS match	no IPS match	ENOG		7e-65	Sarcocystidae		0
TGME49_202170	[INTERPRO, BLASTED, MAPPED, ANNOTATED]	putative transmembrane protein	764	20	0	93.66	1	C:GO:0016020	C:membrane			no IPS match	no IPS match	no IPS match	ENOG		8e-305	Sarcocystidae		0
TGME49_202180	[INTERPRO, BLASTED]	hypothetical protein TGME49_202180	1399	20	0	93.35						no IPS match	no IPS match	no IPS match	ENOG		0	Sarcocystidae		0
TGME49_202190	[INTERPRO, BLASTED, MAPPED, ANNOTATED]	Tub family protein	1024	20	0	80.15	2	P:GO:0061512; C:GO:0005929	P:protein localization to cilium; C:cilium			IPR025659 (G3DSA:3.20.90.GENE3D); IPR000007 (PFAM); IPR025659 (SUPERFAMILY)	no GO terms	no GO terms	KOG,ENOG	Belongs to the TUB family	0	Sarcocystidae		0
TGME49_202200	[INTERPRO, BLASTED]	hypothetical protein TGME49_202200	793	20	0	67.78						IPR036691 (G3DSA:3.60.10.GENE3D); IPR036691 (SUPERFAMILY)	no GO terms	no GO terms	ENOG		0	Sarcocystidae		0
TGME49_202205	[INTERPRO, BLASTED]	hypothetical protein TGME49_202205	133	3	1.09276e-21	98.77						no IPS match	no IPS match	no IPS match
TGME49_202250	[INTERPRO, BLASTED, MAPPED, ANNOTATED]	putative transmembrane protein	1041	20	0	89.01	1	C:GO:0016020	C:membrane			no IPS match	no IPS match	no IPS match	ENOG		0	Sarcocystidae		0
TGME49_202255	[INTERPRO, BLASTED, MAPPED, ANNOTATED]	TPA: WD domain, G-beta repeat-containing protein	559	20	0	70.1	4	P:GO:0060271; C:GO:0005737; C:GO:0005814; C:GO:0036038	P:cilium assembly; C:cytoplasm; C:centriole; C:MKS complex			IPR010796 (PFAM); IPR010796 (PANTHER); IPR010796 (PROSITE_PROFILES)	P:GO:0060271; C:GO:0036038	P:cilium assembly; C:MKS complex	KOG	regulation of cilium movement involved in cell motility	3.9e-83	Eukaryota		0
TGME49_202330	[INTERPRO, BLASTED]	hypothetical protein TGME49_202330	199	1	5.29067e-142	100						no IPS match	no IPS match	no IPS match
TGME49_202375	[INTERPRO, BLASTED, MAPPED, ANNOTATED]	putative transmembrane protein	219	9	4.62298e-67	96.58	1	C:GO:0016020	C:membrane			no IPS match	no IPS match	no IPS match
TGME49_202420	[INTERPRO, BLASTED, MAPPED, ANNOTATED]	putative transmembrane protein	272	7	0	85.44	1	C:GO:0016020	C:membrane			no IPS match	no IPS match	no IPS match	ENOG		1e-153	Sarcocystidae		0
TGME49_202430	[INTERPRO, BLASTED]	hypothetical protein TGME49_202430	555	11	0	90.77						no IPS match	no IPS match	no IPS match	ENOG		2.9e-195	Sarcocystidae		0
TGME49_202440	[INTERPRO, BLASTED, MAPPED, ANNOTATED]	putative transmembrane protein	281	20	0	74.58	1	C:GO:0016020	C:membrane			no IPS match	no IPS match	no IPS match	ENOG		1.8e-145	Sarcocystidae		0
TGME49_202445	[INTERPRO, BLASTED]	hypothetical protein TGME49_202445	173	7	1.23865e-125	99.17						no IPS match	no IPS match	no IPS match
TGME49_202450	[INTERPRO, BLASTED, MAPPED, ANNOTATED]	putative transmembrane protein	202	20	2.69192e-131	82.52	1	C:GO:0016020	C:membrane			no IPS match	no IPS match	no IPS match	ENOG		4.1e-99	Sarcocystidae		0
TGME49_202480	[INTERPRO, BLASTED]	hypothetical protein TGME49_202480	430	11	1.00276e-171	93.2						no IPS match	no IPS match	no IPS match	ENOG		1.8e-136	Sarcocystidae		0
TGME49_202520	[INTERPRO, BLASTED]	hypothetical protein TGME49_202520	989	16	0	90.49						no IPS match	no IPS match	no IPS match	ENOG		0	Sarcocystidae		0
TGME49_202590	[INTERPRO, BLASTED, MAPPED, ANNOTATED]	putative Leu/Phe-tRNA protein transferase	712	20	0	92.27	6	P:GO:0030163; F:GO:0008914; C:GO:0005737	P:protein catabolic process; F:leucyl-tRNA--protein transferase activity; C:cytoplasm	EC:2.3; EC:2.3.2.6; EC:2; EC:2.3.2.8; EC:2.3.2	Acyltransferases; lysine/arginine leucyltransferase; Transferases; arginyltransferase; Acyltransferases	IPR042203 (G3DSA:3.40.630.GENE3D); IPR004616 (PFAM); IPR004616 (PANTHER); IPR016181 (SUPERFAMILY); IPR016181 (SUPERFAMILY)	P:GO:0030163; F:GO:0008914; C:GO:0005737	P:protein catabolic process; F:leucyl-tRNA--protein transferase activity; C:cytoplasm	ENOG	Leucyl/phenylalanyl-tRNA protein transferase	0	Sarcocystidae	EC:2.3.2.8	0			K21419
TGME49_202600	[INTERPRO, BLASTED]	hypothetical protein TGME49_202600	126	6	9.2827e-85	99.74						no IPS match	no IPS match	no IPS match	ENOG		8e-53	Sarcocystidae		0
TGME49_202650	[INTERPRO, BLASTED, MAPPED, ANNOTATED]	putative transmembrane protein	921	20	0	96.9	1	C:GO:0016020	C:membrane			IPR011641 (PFAM); G3DSA:2.10.50.10 (GENE3D); PTHR11319 (PANTHER)	no GO terms	no GO terms	ENOG		0	Sarcocystidae		0
TGME49_202700	[INTERPRO, BLASTED]	hypothetical protein TGME49_202700	926	18	0	90.49						no IPS match	no IPS match	no IPS match	ENOG		2.6e-249	Sarcocystidae		0
TGME49_202730	[INTERPRO, BLASTED]	hypothetical protein TGME49_202730	1454	12	0	94.41						no IPS match	no IPS match	no IPS match	ENOG	nutrient reservoir activity	0	Sarcocystidae		0
TGME49_202735	[INTERPRO, BLASTED]	hypothetical protein TGME49_202735	112	6	2.12849e-53	97.54						no IPS match	no IPS match	no IPS match
TGME49_202760	[INTERPRO, BLASTED]	hypothetical protein TGME49_202760	364	15	0	95.02						no IPS match	no IPS match	no IPS match	ENOG		4.7e-138	Sarcocystidae		0
TGME49_202860	[INTERPRO, BLASTED, MAPPED, ANNOTATED]	putative transmembrane protein	174	8	5.227e-99	96.84	1	C:GO:0016020	C:membrane			no IPS match	no IPS match	no IPS match
TGME49_202890	[INTERPRO, BLASTED]	hypothetical protein TGME49_202890	377	14	0	84.31						no IPS match	no IPS match	no IPS match	ENOG		1.2e-179	Sarcocystidae		0
TGME49_202940	[INTERPRO, BLASTED, MAPPED, ANNOTATED]	putative transmembrane protein	387	9	0	91.61	1	C:GO:0016020	C:membrane			no IPS match	no IPS match	no IPS match	ENOG		1.6e-213	Sarcocystidae		0
TGME49_202950	[INTERPRO, BLASTED, MAPPED, ANNOTATED]	hypothetical protein TGME49_202950	1414	20	0	87.88	2	P:GO:0006606; C:GO:0005737	P:protein import into nucleus; C:cytoplasm			IPR011989 (G3DSA:1.25.10.GENE3D); IPR016024 (SUPERFAMILY)	no GO terms	no GO terms	ENOG		0	Sarcocystidae		0
TGME49_202970	[INTERPRO, BLASTED, MAPPED, ANNOTATED]	hypothetical protein TGME49_202970	2196	20	0	84.14	3	P:GO:0003341; P:GO:0036158; C:GO:0005930	P:cilium movement; P:outer dynein arm assembly; C:axoneme			IPR049258 (PFAM); IPR051876 (PANTHER)	no GO terms	no GO terms	ENOG		0	Sarcocystidae		0
TGME49_202975	[INTERPRO, BLASTED]	hypothetical protein TGME49_202975	449	9	0	99.48						no IPS match	no IPS match	no IPS match
TGME49_202980	[INTERPRO, BLASTED]	NUC173 domain protein	1915	20	0	88.04						IPR012978 (PFAM); IPR011989 (G3DSA:1.25.10.GENE3D); IPR052087 (PANTHER); IPR016024 (SUPERFAMILY)	no GO terms	no GO terms	KOG,ENOG	NUC173 domain	0	Sarcocystidae		0			K14794
TGME49_203040	[INTERPRO, BLASTED]	TPA: hypothetical protein BN1205_046325	1824	14	0	87.71						no IPS match	no IPS match	no IPS match	ENOG		0	Sarcocystidae		0
TGME49_203060	[INTERPRO, BLASTED, MAPPED, ANNOTATED]	TrmH family RNA methyltransferase	496	20	0	74.47	8	P:GO:0006396; P:GO:0032259; F:GO:0003723; F:GO:0008173	P:RNA processing; P:methylation; F:RNA binding; F:RNA methyltransferase activity	EC:2.1; EC:2; EC:2.1.1	Transferring one-carbon groups; Transferases; Transferring one-carbon groups	IPR001537 (PFAM); IPR029026 (G3DSA:3.40.1280.GENE3D); IPR051259 (PANTHER); IPR029028 (SUPERFAMILY)	P:GO:0006396; F:GO:0003723; F:GO:0008173	P:RNA processing; F:RNA binding; F:RNA methyltransferase activity	COG,KOG,ENOG	SpoU rRNA Methylase family	2.7e-269	Sarcocystidae		0
TGME49_203070	[INTERPRO, BLASTED, MAPPED, ANNOTATED]	putative transmembrane protein	239	15	1.40212e-157	74.76	1	C:GO:0016020	C:membrane			no IPS match	no IPS match	no IPS match	ENOG		2e-113	Sarcocystidae		0
TGME49_203090	[INTERPRO, BLASTED]	hypothetical protein TGME49_203090	552	11	0	91.82						no IPS match	no IPS match	no IPS match	ENOG		6.9e-266	Sarcocystidae		0
TGME49_203100	[INTERPRO, BLASTED]	hypothetical protein TGME49_203100	113	1	2.96001e-77	100						no IPS match	no IPS match	no IPS match
TGME49_203120	[INTERPRO, BLASTED, MAPPED, ANNOTATED]	hypothetical protein TGME49_203120	516	13	0	83.74	3	P:GO:0000387; C:GO:0005634; C:GO:0032797	P:spliceosomal snRNP assembly; C:nucleus; C:SMN complex			G3DSA:1.20.58.1070 (GENE3D); IPR035426 (PFAM); PTHR12794 (PANTHER)	P:GO:0000387; C:GO:0005634; C:GO:0032797	P:spliceosomal snRNP assembly; C:nucleus; C:SMN complex	ENOG	Survival motor neuron (SMN) interacting protein 1 (SIP1)	2.9e-258	Sarcocystidae		0
TGME49_203150	[INTERPRO, BLASTED]	hypothetical protein TGME49_203150	1798	13	0	90.72						no IPS match	no IPS match	no IPS match	ENOG		0	Sarcocystidae		0
TGME49_203160	[INTERPRO, BLASTED]	hypothetical protein TGME49_203160	666	20	0	86.27						no IPS match	no IPS match	no IPS match	ENOG		0	Sarcocystidae		0
TGME49_203200	[INTERPRO, BLASTED]	putative leucine rich repeat protein	1903	20	0	98.72						IPR032675 (G3DSA:3.80.10.GENE3D); IPR032675 (G3DSA:3.80.10.GENE3D); IPR052394 (PANTHER); IPR011009 (SUPERFAMILY); SSF52047 (SUPERFAMILY)	no GO terms	no GO terms	ENOG		0	Sarcocystidae		0
TGME49_203230	[INTERPRO, BLASTED, MAPPED]	hypothetical protein TGME49_203230	224	6	4.89989e-121	84.38	1	C:GO:0016020	C:membrane			no IPS match	no IPS match	no IPS match	ENOG		1.6e-91	Sarcocystidae		0
TGME49_203240	[INTERPRO, BLASTED, MAPPED, ANNOTATED]	putative transmembrane protein	739	20	0	93.78	1	C:GO:0016020	C:membrane			IPR000008 (PROSITE_PROFILES)	no GO terms	no GO terms	ENOG		0	Sarcocystidae		0
TGME49_203250	[INTERPRO, BLASTED]	hypothetical protein TGME49_203250	933	11	0	91.14						no IPS match	no IPS match	no IPS match	ENOG		0	Sarcocystidae		0
TGME49_203280	[INTERPRO, BLASTED]	Conserved Plasmodium protein, related	192	20	2.33135e-43	83.83						no IPS match	no IPS match	no IPS match	ENOG		5.5e-45	Sarcocystidae		0
TGME49_203330	[INTERPRO, BLASTED, MAPPED, ANNOTATED]	putative autoantigen, coiled-coil vesicle tethering subfamily A protein 1	431	20	0	80.17	1	C:GO:0016020	C:membrane			PTHR23313 (PANTHER)	no GO terms	no GO terms	ENOG	Golgi autoantigen, golgin subfamily A member 1	1.9e-170	Sarcocystidae		0
TGME49_203350	[INTERPRO, BLASTED, MAPPED, ANNOTATED]	magnesium transporter NIPA	458	20	0	74.63	3	P:GO:1903830; F:GO:0015095; C:GO:0016020	P:magnesium ion transmembrane transport; F:magnesium ion transmembrane transporter activity; C:membrane			IPR008521 (PFAM); IPR008521 (PANTHER); SSF103481 (SUPERFAMILY)	P:GO:0015693; F:GO:0015095; C:GO:0016020	P:magnesium ion transport; F:magnesium ion transmembrane transporter activity; C:membrane	KOG,ENOG	Magnesium transporter NIPA	2.8e-228	Sarcocystidae		0
TGME49_203358	[INTERPRO, BLASTED, MAPPED, ANNOTATED]	hypothetical protein TGME49_203358	395	20	0	82.09	3	P:GO:0006367; F:GO:0001097; C:GO:0005673	P:transcription initiation at RNA polymerase II promoter; F:TFIIH-class transcription factor complex binding; C:transcription factor TFIIE complex			IPR016656 (PANTHER)	P:GO:0006367; F:GO:0001097; C:GO:0005673	P:transcription initiation at RNA polymerase II promoter; F:TFIIH-class transcription factor complex binding; C:transcription factor TFIIE complex	ENOG	Encoded by	8.3e-197	Sarcocystidae		0
TGME49_203400	[INTERPRO, BLASTED, MAPPED, ANNOTATED]	putative transmembrane protein	388	19	0	75.75	6	P:GO:0006334; F:GO:0003677; F:GO:0030527; C:GO:0000786; C:GO:0005654; C:GO:0016020	P:nucleosome assembly; F:DNA binding; F:structural constituent of chromatin; C:nucleosome; C:nucleoplasm; C:membrane			no IPS match	no IPS match	no IPS match	ENOG		3e-215	Sarcocystidae		0
TGME49_203470	[INTERPRO, BLASTED]	hypothetical protein TGME49_203470	191	8	4.14564e-112	98.1						no IPS match	no IPS match	no IPS match
TGME49_203480	[INTERPRO, BLASTED, MAPPED, ANNOTATED]	central domain galactose oxidase	1403	20	0	97.02	1	C:GO:0016020	C:membrane			PF13854 (PFAM); IPR015915 (G3DSA:2.120.10.GENE3D); IPR015915 (SUPERFAMILY)	F:GO:0005515	F:protein binding	ENOG		0	Sarcocystidae		0
TGME49_203505	[INTERPRO, BLASTED, MAPPED]	hypothetical protein TGPRC2_203505	299	15	2.29358e-132	67.51	1	C:GO:0016020	C:membrane			no IPS match	no IPS match	no IPS match
TGME49_203520	[INTERPRO, BLASTED, MAPPED, ANNOTATED]	TPA: cAMP-binding domain containing protein	2079	20	0	89.19	8	P:GO:0007155; P:GO:0007507; P:GO:0042391; P:GO:0051146; F:GO:0030552; C:GO:0005923; C:GO:0016328; C:GO:0042383	P:cell adhesion; P:heart development; P:regulation of membrane potential; P:striated muscle cell differentiation; F:cAMP binding; C:bicellular tight junction; C:lateral plasma membrane; C:sarcolemma			IPR014710 (G3DSA:2.60.120.GENE3D); IPR006916 (PFAM); IPR006916 (PANTHER); IPR000595 (PROSITE_PROFILES); IPR000595 (CDD); IPR018490 (SUPERFAMILY)	F:GO:0030552; C:GO:0016020; C:GO:0042383	F:cAMP binding; C:membrane; C:sarcolemma	ENOG	Popeye protein conserved region	0	Sarcocystidae		0
TGME49_203590	[INTERPRO, BLASTED]	hypothetical protein TGME49_203590	429	9	0	86.01						no IPS match	no IPS match	no IPS match	ENOG		1.7e-243	Sarcocystidae		0
TGME49_203665	[INTERPRO, BLASTED]	amine-terminal region of chorein, A TM vesicle-mediated sorter	9744	20	0	80.8						IPR026854 (PFAM)	no GO terms	no GO terms	COG,KOG,ENOG	regulation of parkin-mediated stimulation of mitophagy in response to mitochondrial depolarization	0	Sarcocystidae		0
TGME49_203682	[INTERPRO, BLASTED, MAPPED, ANNOTATED]	putative transmembrane protein	173	7	5.31631e-108	93.74	1	C:GO:0016020	C:membrane			no IPS match	no IPS match	no IPS match
TGME49_203685	[INTERPRO, BLASTED, MAPPED, ANNOTATED]	hypothetical protein TGME49_203685	125	4	2.27212e-65	99.29	1	C:GO:0016020	C:membrane			no IPS match	no IPS match	no IPS match
TGME49_203688	[INTERPRO, BLASTED, MAPPED, ANNOTATED]	hypothetical protein TGME49_203688	87	3	1.50953e-22	99.35	1	C:GO:0016020	C:membrane			no IPS match	no IPS match	no IPS match
TGME49_203705	[INTERPRO, BLASTED]	hypothetical protein TGME49_203705	142	3	1.85359e-99	99.53						no IPS match	no IPS match	no IPS match
TGME49_203730	[INTERPRO, BLASTED, MAPPED, ANNOTATED]	hypothetical protein TGME49_203730	1245	20	0	72.82	1	C:GO:0110165	C:cellular anatomical entity			no IPS match	no IPS match	no IPS match	ENOG		0	Sarcocystidae		0
TGME49_203740	[INTERPRO, BLASTED]	hypothetical protein TGME49_203740	268	4	6.58333e-170	99.53						no IPS match	no IPS match	no IPS match	ENOG		2.7e-146	Sarcocystidae		0
TGME49_203750	[INTERPRO, BLASTED, MAPPED, ANNOTATED]	N-acetyltransferase B complex (NatB) non catalytic subunit	1382	20	0	89.7	2	F:GO:0016740; C:GO:0031416	F:transferase activity; C:NatB complex	EC:2	Transferases	no IPS match	no IPS match	no IPS match	ENOG		0	Sarcocystidae		0
TGME49_203760	[INTERPRO, BLASTED, MAPPED]	hypothetical protein TGME49_203760	1396	20	0	93.23	1	F:GO:0003723	F:RNA binding			no IPS match	no IPS match	no IPS match	ENOG		0	Sarcocystidae		0
TGME49_203770	[INTERPRO, BLASTED, MAPPED, ANNOTATED]	putative transmembrane protein	238	4	1.26268e-163	86.8	1	C:GO:0016020	C:membrane			no IPS match	no IPS match	no IPS match
TGME49_203780	[INTERPRO, BLASTED]	putative proteophosphoglycan 5, related protein	1475	13	0	92.06						no IPS match	no IPS match	no IPS match	ENOG		0	Sarcocystidae		0
TGME49_203790	[INTERPRO, BLASTED]	hypothetical protein TGME49_203790	302	7	0	85.98						no IPS match	no IPS match	no IPS match	ENOG		4.7e-176	Sarcocystidae		0
TGME49_203800	[INTERPRO, BLASTED, MAPPED]	OST-HTH associated domain protein	1469	20	0	76.99	2	P:GO:0030041; C:GO:0005884	P:actin filament polymerization; C:actin filament			IPR041966 (G3DSA:3.30.420.GENE3D); IPR025677 (PFAM); IPR025605 (PROSITE_PROFILES)	no GO terms	no GO terms	ENOG	OST-HTH Associated domain	0	Sarcocystidae		0
TGME49_203815	[INTERPRO, BLASTED, MAPPED, ANNOTATED]	hypothetical protein TGME49_203815	113	8	1.17697e-77	98.5	1	C:GO:0016020	C:membrane			no IPS match	no IPS match	no IPS match
TGME49_203820	[INTERPRO, BLASTED]	hypothetical protein TGME49_203820	1267	18	0	79.38						no IPS match	no IPS match	no IPS match	ENOG		0	Sarcocystidae		0
TGME49_203860	[INTERPRO, BLASTED]	hypothetical protein TGME49_203860	495	11	0	93.35						no IPS match	no IPS match	no IPS match	ENOG		1.6e-242	Sarcocystidae		0
TGME49_203880	[INTERPRO, BLASTED, MAPPED, ANNOTATED]	TPA: hypothetical protein BN1205_045440	1780	16	0	90.72	1	C:GO:0016020	C:membrane			no IPS match	no IPS match	no IPS match	ENOG		0	Sarcocystidae		0
TGME49_203890	[INTERPRO, BLASTED, MAPPED]	hypothetical protein TGME49_203890	315	8	0	81.95	1	C:GO:0016020	C:membrane			no IPS match	no IPS match	no IPS match	ENOG		1.8e-170	Sarcocystidae		0
TGME49_203930	[INTERPRO, BLASTED, MAPPED, ANNOTATED]	putative transmembrane protein	566	12	0	90.08	1	C:GO:0016020	C:membrane			no IPS match	no IPS match	no IPS match	ENOG		8e-201	Sarcocystidae		0
TGME49_203960	[INTERPRO, BLASTED, MAPPED, ANNOTATED]	Snurportin-1 (RNA U transporter 1)	808	20	0	81.16	3	P:GO:0061015; C:GO:0005634; C:GO:0005737	P:snRNA import into nucleus; C:nucleus; C:cytoplasm			G3DSA:3.30.470.30 (GENE3D); G3DSA:3.30.470.30 (GENE3D); PIRSR037955-1 (PIRSR); IPR017336 (PANTHER)	P:GO:0061015; C:GO:0005634; C:GO:0005737	P:snRNA import into nucleus; C:nucleus; C:cytoplasm	KOG,ENOG	snRNA import into nucleus	0	Sarcocystidae		0			K13151	map03013
TGME49_203980	[INTERPRO, BLASTED]	hypothetical protein TGME49_203980	1919	20	0	98.45						no IPS match	no IPS match	no IPS match	ENOG		0	Sarcocystidae		0
TGME49_203985	[INTERPRO, BLASTED]	hypothetical protein TGME49_203985	103	4	9.72969e-71	97.33						no IPS match	no IPS match	no IPS match
TGME49_204000	[INTERPRO, BLASTED, MAPPED, ANNOTATED]	putative transmembrane protein	252	7	3.53778e-165	93.55	1	C:GO:0016020	C:membrane			no IPS match	no IPS match	no IPS match	ENOG		9.6e-122	Sarcocystidae		0
TGME49_204010	[INTERPRO, BLASTED]	hypothetical protein TGME49_204010	220	5	4.71453e-152	99.25						no IPS match	no IPS match	no IPS match	ENOG		4.7e-125	Sarcocystidae		0
TGME49_204040	[INTERPRO, BLASTED, MAPPED, ANNOTATED]	presenilin	796	20	0	73.7	48	P:GO:0006509; P:GO:0006816; P:GO:0007219; P:GO:0007220; P:GO:0016485; P:GO:0042987; P:GO:0043066; P:GO:0050435; F:GO:0042500; C:GO:0005634; C:GO:0005743; C:GO:0005765; C:GO:0005789; C:GO:0005794; C:GO:0005938; C:GO:0009986; C:GO:0016324; C:GO:0030018; C:GO:0030426; C:GO:0035253; C:GO:0043025; C:GO:0043198; C:GO:0045121; C:GO:0048471	P:membrane protein ectodomain proteolysis; P:calcium ion transport; P:Notch signaling pathway; P:Notch receptor processing; P:protein processing; P:amyloid precursor protein catabolic process; P:negative regulation of apoptotic process; P:amyloid-beta metabolic process; F:aspartic endopeptidase activity, intramembrane cleaving; C:nucleus; C:mitochondrial inner membrane; C:lysosomal membrane; C:en…	EC:3.4.23; EC:3.4; EC:3	Acting on peptide bonds (peptidases); Acting on peptide bonds (peptidases); Hydrolases	IPR042524 (G3DSA:1.10.472.GENE3D); IPR001108 (PFAM); IPR001108 (PANTHER)	P:GO:0006509; P:GO:0006816; P:GO:0007220; P:GO:0016485; P:GO:0042987; P:GO:0043066; P:GO:0050435; F:GO:0004175; F:GO:0042500; C:GO:0005634; C:GO:0005743; C:GO:0005765; C:GO:0005886; C:GO:0005938; C:GO:0009986; C:GO:0016020; C:GO:0016324; C:GO:0030018; C:GO:0030426; C:GO:0031594; C:GO:0035253; C:GO:0043025; C:GO:0043198; C:GO:0045121; C:GO:0048471	P:membrane protein ectodomain proteolysis; P:calcium ion transport; P:Notch receptor processing; P:protein processing; P:amyloid precursor protein catabolic process; P:negative regulation of apoptotic process; P:amyloid-beta metabolic process; F:endopeptidase activity; F:aspartic endopeptidase activity, intramembrane cleaving; C:nucleus; C:mitochondrial inner membrane; C:lysosomal membrane; C:pla…	ENOG	Presenilin	0	Sarcocystidae		0
TGME49_204045	[INTERPRO, BLASTED]	hypothetical protein TGME49_204045	128	4	1.22321e-86	99.61						no IPS match	no IPS match	no IPS match
TGME49_204290	[INTERPRO, BLASTED, MAPPED]	putative transmembrane protein	911	20	0	75.96	1	C:GO:0016020	C:membrane			no IPS match	no IPS match	no IPS match	ENOG		0	Sarcocystidae		0
TGME49_204300	[INTERPRO, BLASTED, MAPPED, ANNOTATED]	putative transmembrane protein	744	20	0	87.38	1	C:GO:0016020	C:membrane			no IPS match	no IPS match	no IPS match	ENOG		0	Sarcocystidae		0
TGME49_204310	[INTERPRO, BLASTED, MAPPED, ANNOTATED]	putative transmembrane protein	2209	20	0	96.76	1	C:GO:0016020	C:membrane			no IPS match	no IPS match	no IPS match	ENOG		0	Sarcocystidae		0
TGME49_204320	[INTERPRO, BLASTED, MAPPED, ANNOTATED]	putative transmembrane protein	287	4	0	91.64	1	C:GO:0016020	C:membrane			no IPS match	no IPS match	no IPS match	ENOG		8.3e-154	Sarcocystidae		0
TGME49_204325	[INTERPRO, BLASTED, MAPPED, ANNOTATED]	peptidyl-prolyl cis-trans isomerase, cyclophilin-type	106	6	6.21777e-63	89.44	8	P:GO:0000209; F:GO:0003755; F:GO:0061630; C:GO:0071013	P:protein polyubiquitination; F:peptidyl-prolyl cis-trans isomerase activity; F:ubiquitin protein ligase activity; C:catalytic step 2 spliceosome	EC:5.2.1.8; EC:2.3; EC:5.2; EC:2; EC:5; EC:2.3.2	peptidylprolyl isomerase; Acyltransferases; Cis-trans-isomerases; Transferases; Isomerases; Acyltransferases	IPR029000 (G3DSA:2.40.100.GENE3D); IPR029000 (SUPERFAMILY)	no GO terms	no GO terms	COG,KOG	peptidyl-prolyl cis-trans isomerase activity	6.4e-35	Eukaryota		0			K03061	map03050,map05169
TGME49_204330	[INTERPRO, BLASTED]	hypothetical protein TGME49_204330	264	5	0	99.24						no IPS match	no IPS match	no IPS match	COG,KOG	peptidyl-prolyl cis-trans isomerase activity	3e-94	Eukaryota		0			K03061	map03050,map05169
TGME49_204380	[INTERPRO, BLASTED, MAPPED, ANNOTATED]	hypothetical protein TGME49_204380	3218	18	0	83.54	1	C:GO:0005622	C:intracellular anatomical structure			no IPS match	no IPS match	no IPS match	ENOG		0	Sarcocystidae		0
TGME49_204390	[INTERPRO, BLASTED, MAPPED]	Oxoglutarate/iron-dependent dioxygenase	370	20	0	82.2	3	F:GO:0016491; F:GO:0046872; F:GO:0051213	F:oxidoreductase activity; F:metal ion binding; F:dioxygenase activity			IPR037151 (G3DSA:2.60.120.GENE3D); PTHR42256 (PANTHER); PS51257 (PROSITE_PROFILES); SSF51197 (SUPERFAMILY)	no GO terms	no GO terms	ENOG		5.4e-174	Sarcocystidae		0
TGME49_204395	[INTERPRO, BLASTED]	hypothetical protein TGGT1_204395	108	4	1.00235e-35	99.09						no IPS match	no IPS match	no IPS match
TGME49_204490	[INTERPRO, BLASTED]	hypothetical protein TGRH88_034630	254	7	8.63264e-63	86.23						no IPS match	no IPS match	no IPS match	ENOG		3e-30	Sarcocystidae		0
TGME49_204500	[INTERPRO, BLASTED, MAPPED, ANNOTATED]	putative transmembrane protein	438	8	0	99.14	1	C:GO:0016020	C:membrane			no IPS match	no IPS match	no IPS match	ENOG		8.3e-206	Sarcocystidae		0
TGME49_204505	[INTERPRO, BLASTED]	hypothetical protein TGME49_204505	72	4	6.96024e-45	98.96						no IPS match	no IPS match	no IPS match
TGME49_204520	[INTERPRO, BLASTED]	hypothetical protein TGME49_204520	369	12	7.1142e-124	93.06						no IPS match	no IPS match	no IPS match	ENOG	cell differentiation	3.7e-122	Sarcocystidae		0
TGME49_204550	[INTERPRO, BLASTED, MAPPED]	hypothetical protein TGME49_204550	953	20	0	76.83	2	P:GO:0006631; F:GO:0031956	P:fatty acid metabolic process; F:medium-chain fatty acid-CoA ligase activity			IPR042099 (G3DSA:3.40.50.GENE3D); SSF56801 (SUPERFAMILY)	no GO terms	no GO terms	ENOG		0	Sarcocystidae		0
TGME49_204880	[INTERPRO, BLASTED]	hypothetical protein TGME49_204880	897	12	0	88.75						no IPS match	no IPS match	no IPS match	ENOG		0	Sarcocystidae		0
TGME49_205020	[INTERPRO, BLASTED]	hypothetical protein TGME49_205020	480	10	0	97.42						no IPS match	no IPS match	no IPS match	ENOG		4.3e-155	Sarcocystidae		0
TGME49_205050	[INTERPRO, BLASTED]	hypothetical protein TGME49_205050	1207	13	0	90.71						no IPS match	no IPS match	no IPS match	ENOG	XS domain	0	Sarcocystidae		0
TGME49_205060	[INTERPRO, BLASTED, MAPPED, ANNOTATED]	glycosyltransferase family 32 protein	586	20	0	74.11	4	P:GO:0051999; F:GO:0000030	P:mannosyl-inositol phosphorylceramide biosynthetic process; F:mannosyltransferase activity	EC:2.4; EC:2; EC:2.4.1	Glycosyltransferases; Transferases; Glycosyltransferases	G3DSA:3.90.550.20 (GENE3D); IPR007577 (PFAM); IPR051706 (PANTHER); IPR029044 (SUPERFAMILY)	P:GO:0051999; F:GO:0000030	P:mannosyl-inositol phosphorylceramide biosynthetic process; F:mannosyltransferase activity	ENOG		4.1e-301	Sarcocystidae		0
TGME49_205070	[INTERPRO, BLASTED, MAPPED]	hypothetical protein TGME49_205070	146	20	1.34329e-86	70.49	1	C:GO:0016020	C:membrane			no IPS match	no IPS match	no IPS match	ENOG		3.9e-75	Sarcocystidae		0
TGME49_205080	[INTERPRO, BLASTED, MAPPED, ANNOTATED]	toxoplasma gondii family d protein	192	20	5.39538e-138	66.39	1	C:GO:0016020	C:membrane			no IPS match	no IPS match	no IPS match	ENOG		2e-50	Sarcocystidae		0
TGME49_205100	[INTERPRO, BLASTED, MAPPED, ANNOTATED]	putative transmembrane protein	583	16	0	91.02	1	C:GO:0016020	C:membrane			no IPS match	no IPS match	no IPS match	ENOG		0	Sarcocystidae		0
TGME49_205120	[INTERPRO, BLASTED, MAPPED, ANNOTATED]	putative transmembrane protein	1487	16	0	90.88	7	P:GO:0072318; P:GO:0072583; F:GO:0003729; F:GO:0030276; C:GO:0005634; C:GO:0005737; C:GO:0031982	P:clathrin coat disassembly; P:clathrin-dependent endocytosis; F:mRNA binding; F:clathrin binding; C:nucleus; C:cytoplasm; C:vesicle			no IPS match	no IPS match	no IPS match	ENOG		0	Sarcocystidae		0
TGME49_205140	[INTERPRO, BLASTED, MAPPED, ANNOTATED]	hypothetical protein TGME49_205140	1394	20	0	77.95	1	C:GO:0110165	C:cellular anatomical entity			no IPS match	no IPS match	no IPS match	ENOG		0	Sarcocystidae		0
TGME49_205170	[INTERPRO, BLASTED]	hypothetical protein TGARI_205170	157	8	7.32549e-110	90.74						no IPS match	no IPS match	no IPS match	ENOG		3.6e-87	Sarcocystidae		0
TGME49_205190	[INTERPRO, BLASTED]	hypothetical protein TGME49_205190	1681	12	0	90.7						no IPS match	no IPS match	no IPS match	ENOG		0	Sarcocystidae		0
TGME49_205200	[INTERPRO, BLASTED, MAPPED]	hypothetical protein TGPRC2_205200	1281	14	0	85.48	3	F:GO:0003723; C:GO:0016020; C:GO:0036396	F:RNA binding; C:membrane; C:RNA N6-methyladenosine methyltransferase complex			no IPS match	no IPS match	no IPS match	ENOG		0	Sarcocystidae		0
TGME49_205210	[INTERPRO, BLASTED]	hypothetical protein TGME49_205210	187	8	5.26151e-106	95.13						no IPS match	no IPS match	no IPS match	ENOG		7.7e-92	Sarcocystidae		0
TGME49_205230	[INTERPRO, BLASTED]	hypothetical protein TGME49_205230	108	6	5.91875e-74	85.38						no IPS match	no IPS match	no IPS match
TGME49_205280	[INTERPRO, BLASTED, MAPPED, ANNOTATED]	putative transmembrane protein	479	20	0	73.08	1	C:GO:0016020	C:membrane			no IPS match	no IPS match	no IPS match	ENOG		2.6e-269	Sarcocystidae		0
TGME49_205300	[INTERPRO, BLASTED, MAPPED, ANNOTATED]	sulfite exporter TauE/SafE protein	697	20	0	73.03	3	P:GO:0016567; C:GO:0016020; C:GO:0031464	P:protein ubiquitination; C:membrane; C:Cul4A-RING E3 ubiquitin ligase complex			IPR002781 (PFAM); PTHR14255 (PANTHER)	P:GO:0016567; C:GO:0016020; C:GO:0031464	P:protein ubiquitination; C:membrane; C:Cul4A-RING E3 ubiquitin ligase complex	ENOG	Sulfite exporter TauE/SafE	0	Sarcocystidae		0
TGME49_205320	[INTERPRO, BLASTED, MAPPED, ANNOTATED]	putative maebl	655	20	0	95.18	4	P:GO:0006357; F:GO:0000978; F:GO:0000981; C:GO:0005634	P:regulation of transcription by RNA polymerase II; F:RNA polymerase II cis-regulatory region sequence-specific DNA binding; F:DNA-binding transcription factor activity, RNA polymerase II-specific; C:nucleus			no IPS match	no IPS match	no IPS match	ENOG	QWRF family	1.2e-176	Sarcocystidae		0
TGME49_205330	[INTERPRO, BLASTED, MAPPED, ANNOTATED]	putative transmembrane protein	331	9	0	73.1	1	C:GO:0016020	C:membrane			no IPS match	no IPS match	no IPS match	ENOG		7.5e-183	Sarcocystidae		0
TGME49_205360	[INTERPRO, BLASTED, MAPPED, ANNOTATED]	putative transmembrane protein	2607	20	0	91.02	1	C:GO:0016020	C:membrane			no IPS match	no IPS match	no IPS match	ENOG		0	Sarcocystidae		0
TGME49_205370	[INTERPRO, BLASTED, MAPPED, ANNOTATED]	putative proteophosphoglycan protein ppg4	741	9	0	85.15	1	C:GO:0016020	C:membrane			no IPS match	no IPS match	no IPS match	ENOG		5.4e-258	Sarcocystidae		0
TGME49_205390	[INTERPRO, BLASTED]	hypothetical protein TGME49_205390	303	6	0	83.12						no IPS match	no IPS match	no IPS match	ENOG		2.2e-157	Sarcocystidae		0
TGME49_205425	[INTERPRO, BLASTED]	hypothetical protein TGME49_205425	110	5	8.01555e-77	98.67						no IPS match	no IPS match	no IPS match
TGME49_205450	[INTERPRO, BLASTED]	putative transmembrane protein	145	3	7.22569e-102	71.27						no IPS match	no IPS match	no IPS match	ENOG		1.1e-82	Sarcocystidae		0
TGME49_205530	[INTERPRO, BLASTED]	hypothetical protein TGME49_205530	148	2	1.14727e-93	100						no IPS match	no IPS match	no IPS match
TGME49_205562	[INTERPRO, BLASTED]	collagen triple helix protein	5843	20	0	98.09						PTHR13491 (PANTHER)	no GO terms	no GO terms	COG,KOG	protein transport	0	Eukaryota		16	P:GO:0006620; F:GO:0070273; C:GO:0022626; P:GO:0009651; F:GO:0070300; F:GO:0051082; F:GO:0032266; P:GO:0051083; P:GO:0006886; C:GO:0009986; C:GO:0005794; C:GO:0009506; C:GO:0005854; P:GO:0015833; C:GO:1990904; F:GO:0080025	F:phosphatidylinositol-3-phosphate binding; P:peptide transport; F:unfolded protein binding; P:'de novo' cotranslational protein folding; F:phosphatidylinositol-4-phosphate binding; C:ribonucleoprotein complex; C:nascent polypeptide-associated complex; P:response to salt stress; C:cell surface; C:plasmodesma; P:post-translational protein targeting to endoplasmic reticulum membrane; F:phosphatidyl…	K03626
TGME49_205615	[INTERPRO, BLASTED, MAPPED, ANNOTATED]	hypothetical protein TGME49_205615	3156	20	0	95.32	3	P:GO:0042981; F:GO:0042393; C:GO:0005634	P:regulation of apoptotic process; F:histone binding; C:nucleus			no IPS match	no IPS match	no IPS match	COG,KOG,ENOG	sphingolipid transporter activity	0	Sarcocystidae		0
TGME49_205630	[INTERPRO, BLASTED]	hypothetical protein TGME49_205630	136	6	8.79881e-94	90						no IPS match	no IPS match	no IPS match
TGME49_205640	[INTERPRO, BLASTED]	TPA: Serine/arginine repetitive matrix protein 2 (pre-mRNA splicing)	1906	12	0	93.08						no IPS match	no IPS match	no IPS match	ENOG		0	Sarcocystidae		0
TGME49_205680	[INTERPRO, BLASTED, MAPPED, ANNOTATED]	putative transmembrane protein	805	20	5.15295e-159	94.01	2	C:GO:0005576; C:GO:0016020	C:extracellular region; C:membrane			no IPS match	no IPS match	no IPS match	ENOG		1e-289	Sarcocystidae		0
TGME49_205690	[INTERPRO, BLASTED, MAPPED, ANNOTATED]	putative transmembrane protein	409	13	0	73.21	1	C:GO:0016020	C:membrane			no IPS match	no IPS match	no IPS match	ENOG		4.4e-217	Sarcocystidae		0
TGME49_205730	[INTERPRO, BLASTED, MAPPED]	hypothetical protein TGME49_205730	152	20	1.67412e-92	72.41	1	F:GO:0003676	F:nucleic acid binding			no IPS match	no IPS match	no IPS match	ENOG		4.5e-82	Sarcocystidae		0
TGME49_205770	[INTERPRO, BLASTED]	hypothetical protein TGME49_205770	79	4	8.56045e-49	99.37						no IPS match	no IPS match	no IPS match
TGME49_206290	[INTERPRO, BLASTED, MAPPED, ANNOTATED]	putative transmembrane protein	441	11	0	99.86	1	C:GO:0016020	C:membrane			no IPS match	no IPS match	no IPS match	ENOG		5.8e-74	Sarcocystidae		0
TGME49_206300	[INTERPRO, BLASTED, MAPPED, ANNOTATED]	NOL1/NOP2/sun family protein	825	20	0	69.85	4	P:GO:0001510; F:GO:0008173	P:RNA methylation; F:RNA methyltransferase activity	EC:2.1; EC:2; EC:2.1.1	Transferring one-carbon groups; Transferases; Transferring one-carbon groups	IPR029063 (G3DSA:3.40.50.GENE3D); IPR029063 (G3DSA:3.40.50.GENE3D); IPR049560 (PFAM); IPR029063 (G3DSA:3.40.50.GENE3D); IPR023267 (PANTHER); IPR029063 (SUPERFAMILY)	P:GO:0001510; F:GO:0008173	P:RNA methylation; F:RNA methyltransferase activity	ENOG	16S rRNA methyltransferase RsmB/F	0	Sarcocystidae		0
TGME49_206320	[INTERPRO, BLASTED, MAPPED, ANNOTATED]	putative transmembrane protein	294	20	1.0608e-177	72.02	1	C:GO:0016020	C:membrane			no IPS match	no IPS match	no IPS match	ENOG		6.5e-146	Sarcocystidae		0
TGME49_206340	[INTERPRO, BLASTED, MAPPED, ANNOTATED]	putative transmembrane protein	187	4	2.41001e-112	89.47	1	C:GO:0016020	C:membrane			no IPS match	no IPS match	no IPS match	ENOG		8.4e-99	Sarcocystidae		0
TGME49_206380	[INTERPRO, BLASTED]	TPA: hypothetical protein BN1205_043310	2743	14	0	87.52						no IPS match	no IPS match	no IPS match	ENOG		0	Sarcocystidae		0
TGME49_206460	[INTERPRO, BLASTED]	hypothetical protein TGME49_206460	159	5	7.13248e-88	98.36						no IPS match	no IPS match	no IPS match
TGME49_206500	[INTERPRO, BLASTED, MAPPED, ANNOTATED]	methyltransferase	1273	20	0	82.86	4	P:GO:0032259; F:GO:0008168	P:methylation; F:methyltransferase activity	EC:2.1; EC:2; EC:2.1.1	Transferring one-carbon groups; Transferases; Transferring one-carbon groups	G3DSA:3.30.2130.30 (GENE3D)	no GO terms	no GO terms	ENOG		0	Sarcocystidae		0
TGME49_206520	[INTERPRO, BLASTED]	hypothetical protein TGME49_206520	215	7	4.62455e-142	99.4						no IPS match	no IPS match	no IPS match
TGME49_206540	[INTERPRO, BLASTED, MAPPED, ANNOTATED]	putative transmembrane protein	1255	20	0	94.63	6	P:GO:0008380; F:GO:0003723; C:GO:0000428; C:GO:0016020; C:GO:0061574; C:GO:0071011	P:RNA splicing; F:RNA binding; C:DNA-directed RNA polymerase complex; C:membrane; C:ASAP complex; C:precatalytic spliceosome			no IPS match	no IPS match	no IPS match	ENOG		0	Sarcocystidae		0
TGME49_206550	[INTERPRO, BLASTED]	putative hydin-like protein	5232	20	0	96.21						IPR013783 (G3DSA:2.60.40.GENE3D); NF012200 (NCBIFAM); IPR013783 (G3DSA:2.60.40.GENE3D); IPR013783 (G3DSA:2.60.40.GENE3D); IPR013783 (G3DSA:2.60.40.GENE3D); IPR013783 (G3DSA:2.60.40.GENE3D); IPR053879 (PFAM); PF14874 (PFAM); IPR033305 (PANTHER); IPR000535 (PROSITE_PROFILES); IPR008962 (SUPERFAMILY)	P:GO:0003341; P:GO:1904158; C:GO:0005930	P:cilium movement; P:axonemal central apparatus assembly; C:axoneme	ENOG	Flagellar-associated PapD-like	0	Sarcocystidae		0			K17570
TGME49_206630	[INTERPRO, BLASTED, MAPPED, ANNOTATED]	CAAX protease self-immunity protein	665	20	0	76.13	6	P:GO:0006508; F:GO:0008233; C:GO:0016020	P:proteolysis; F:peptidase activity; C:membrane	EC:3.4; EC:3	Acting on peptide bonds (peptidases); Hydrolases	no IPS match	no IPS match	no IPS match	ENOG	CAAX protease self-immunity	3.3e-270	Sarcocystidae		0
TGME49_206640	[INTERPRO, BLASTED, MAPPED]	putative at hook motif protein	1282	20	0	94.19	6	P:GO:0005982; P:GO:2000904; F:GO:2001070; C:GO:0009507; C:GO:0009570; C:GO:0043036	P:starch metabolic process; P:regulation of starch metabolic process; F:starch binding; C:chloroplast; C:chloroplast stroma; C:starch grain			no IPS match	no IPS match	no IPS match	ENOG		0	Sarcocystidae		0
TGME49_206660	[INTERPRO, BLASTED]	hypothetical protein TGME49_206660	388	8	0	94.78						no IPS match	no IPS match	no IPS match	ENOG		2.1e-221	Sarcocystidae		0
TGME49_206680	[INTERPRO, BLASTED, MAPPED, ANNOTATED]	hypothetical protein TGME49_206680	216	20	1.77964e-157	75.84	1	C:GO:0016020	C:membrane			no IPS match	no IPS match	no IPS match	ENOG		2.9e-103	Sarcocystidae		0
TGME49_206700	[INTERPRO, BLASTED]	hypothetical protein TGME49_206700	240	9	1.7553e-163	71.35						no IPS match	no IPS match	no IPS match	ENOG		5.5e-127	Sarcocystidae		0
TGME49_206710	[INTERPRO, BLASTED]	chromosome segregation protein, putative	675	20	0	83.29						no IPS match	no IPS match	no IPS match	ENOG		0	Sarcocystidae		0
TGME49_206910	[INTERPRO, BLASTED]	hypothetical protein TGME49_206910	98	2	5.97999e-64	99.49						no IPS match	no IPS match	no IPS match
TGME49_207020	[INTERPRO, BLASTED, MAPPED, ANNOTATED]	hypothetical protein TGME49_207020	141	20	2.25584e-100	81.56	1	C:GO:0016020	C:membrane			G3DSA:3.40.30.10 (GENE3D)	no GO terms	no GO terms	ENOG		9.9e-76	Sarcocystidae		0
TGME49_207040	[INTERPRO, BLASTED, MAPPED]	hypothetical protein TGME49_207040	1187	20	0	90.83	1	C:GO:0016020	C:membrane			no IPS match	no IPS match	no IPS match	ENOG		0	Sarcocystidae		0
TGME49_207050	[INTERPRO, BLASTED, MAPPED, ANNOTATED]	putative transmembrane protein	420	9	4.8513e-159	98.47	1	C:GO:0016020	C:membrane			no IPS match	no IPS match	no IPS match	ENOG		6.4e-147	Sarcocystidae		0
TGME49_207065	[INTERPRO, BLASTED, MAPPED, ANNOTATED]	putative glycosyl transferase	129	10	5.14152e-86	98.01	7	P:GO:0006488; P:GO:0009263; F:GO:0004577; F:GO:0004748; C:GO:0005829; C:GO:0031965; C:GO:0043541	P:dolichol-linked oligosaccharide biosynthetic process; P:deoxyribonucleotide biosynthetic process; F:N-acetylglucosaminyldiphosphodolichol N-acetylglucosaminyltransferase activity; F:ribonucleoside-diphosphate reductase activity, thioredoxin disulfide as acceptor; C:cytosol; C:nuclear membrane; C:UDP-N-acetylglucosamine transferase complex	EC:2.4.1.141; EC:1.17.4.1	N-acetylglucosaminyldiphosphodolichol N-acetylglucosaminyltransferase; ribonucleoside-diphosphate reductase	no IPS match	no IPS match	no IPS match
TGME49_207100	[INTERPRO, BLASTED, MAPPED, ANNOTATED]	Conserved Plasmodium protein, related	1384	20	0	92.31	2	F:GO:0035241	F:protein-arginine omega-N monomethyltransferase activity	EC:2.1; EC:2; EC:2.1.1.321; EC:2.1.1	Transferring one-carbon groups; Transferases; type III protein arginine methyltransferase; Transferring one-carbon groups	IPR029063 (G3DSA:3.40.50.GENE3D); IPR029063 (SUPERFAMILY)	no GO terms	no GO terms	ENOG		0	Sarcocystidae		0
TGME49_207200	[INTERPRO, BLASTED, MAPPED]	heptatricopeptide repeat-containing protein, putative	1604	20	0	73.24	3	P:GO:0000398; C:GO:0005634; C:GO:0005681	P:mRNA splicing, via spliceosome; C:nucleus; C:spliceosomal complex			no IPS match	no IPS match	no IPS match	ENOG		0	Sarcocystidae		0
TGME49_207210	[INTERPRO, BLASTED]	hypothetical protein TGME49_207210	110	3	1.0778e-52	93.45						no IPS match	no IPS match	no IPS match	ENOG		2.9e-59	Sarcocystidae		0
TGME49_207230	[INTERPRO, BLASTED]	hypothetical protein TGPRC2_207230	1248	14	0	90.74						no IPS match	no IPS match	no IPS match	ENOG		0	Sarcocystidae		0
TGME49_207240	[INTERPRO, BLASTED]	Ubiquitin-related domain containing protein	108	20	8.12357e-71	74.08						G3DSA:3.10.20.90 (GENE3D); IPR000626 (PROSITE_PROFILES); IPR029071 (SUPERFAMILY)	F:GO:0005515	F:protein binding	ENOG		2e-52	Sarcocystidae		0
TGME49_207350	[INTERPRO, BLASTED]	TPA: hypothetical protein BN1204_002460	462	6	0	91.36						no IPS match	no IPS match	no IPS match	ENOG		2.9e-108	Sarcocystidae		0
TGME49_207403	[INTERPRO, BLASTED]	hypothetical protein TGME49_207403	101	2	3.2254e-57	98.65						no IPS match	no IPS match	no IPS match
TGME49_207420	[INTERPRO, BLASTED, MAPPED, ANNOTATED]	TPA: hypothetical protein BN1205_040860	188	20	2.01138e-117	71.74	1	C:GO:0016020	C:membrane			no IPS match	no IPS match	no IPS match	ENOG		0.0013	Haemosporida		0
TGME49_207730	[INTERPRO, BLASTED, MAPPED]	hypothetical protein TGME49_207730	1243	20	0	86.1	3	F:GO:0005524; C:GO:0000178; C:GO:0005634	F:ATP binding; C:exosome (RNase complex); C:nucleus			IPR011009 (SUPERFAMILY)	no GO terms	no GO terms	ENOG		0	Sarcocystidae		0
TGME49_207740	[INTERPRO, BLASTED]	hypothetical protein TGME49_207740	752	12	0	93.61						no IPS match	no IPS match	no IPS match	ENOG		0	Sarcocystidae		0
TGME49_207780	[INTERPRO, BLASTED]	putative transmembrane protein	205	10	9.81627e-139	96.61						no IPS match	no IPS match	no IPS match	ENOG		4e-110	Sarcocystidae		0
TGME49_207800	[INTERPRO, BLASTED]	hypothetical protein TGME49_207800	421	20	0	75.11						no IPS match	no IPS match	no IPS match	ENOG		5.9e-241	Sarcocystidae		0
TGME49_207920	[INTERPRO, BLASTED, MAPPED, ANNOTATED]	putative transmembrane protein	662	17	0	95.53	1	C:GO:0016020	C:membrane			no IPS match	no IPS match	no IPS match	ENOG		0	Sarcocystidae		0
TGME49_207950	[INTERPRO, BLASTED, MAPPED, ANNOTATED]	putative transmembrane protein	177	11	3.34006e-106	89.62	1	C:GO:0016020	C:membrane			no IPS match	no IPS match	no IPS match	ENOG		1.9e-84	Sarcocystidae		0
TGME49_207955	[INTERPRO, BLASTED]	hypothetical protein TGME49_207955	150	3	3.06845e-84	90.54						no IPS match	no IPS match	no IPS match
TGME49_208300	[INTERPRO, BLASTED, MAPPED, ANNOTATED]	ankyrin repeat domain containing protein	105	20	2.56073e-71	75.24	2	P:GO:0033617; C:GO:0005758	P:mitochondrial cytochrome c oxidase assembly; C:mitochondrial intermembrane space			IPR039870 (PANTHER)	P:GO:0033617; C:GO:0005758	P:mitochondrial cytochrome c oxidase assembly; C:mitochondrial intermembrane space	ENOG	Coiled-coil-helix-coiled-coil-helix domain containing 8. Source PGD	5.2e-05	Pythiales		0			K18177	map04714
TGME49_208360	[INTERPRO, BLASTED, MAPPED, ANNOTATED]	putative transmembrane protein	985	17	0	83.62	1	C:GO:0016020	C:membrane			no IPS match	no IPS match	no IPS match	ENOG	Putative adipose-regulatory protein (Seipin)	0	Sarcocystidae		0
TGME49_208380	[INTERPRO, BLASTED]	hypothetical protein TGME49_208380	366	14	0	91.09						no IPS match	no IPS match	no IPS match	ENOG		3.3e-208	Sarcocystidae		0
TGME49_208400	[INTERPRO, BLASTED]	hypothetical protein TGVEG_208400	2067	20	0	99.44						no IPS match	no IPS match	no IPS match	ENOG		0	Sarcocystidae		0
TGME49_208510	[INTERPRO, BLASTED, MAPPED]	hypothetical protein TGME49_208510	1060	20	0	92.83	1	C:GO:0016020	C:membrane			no IPS match	no IPS match	no IPS match	ENOG		0	Sarcocystidae		0
TGME49_208550	[INTERPRO, BLASTED, MAPPED, ANNOTATED]	putative transmembrane protein	314	13	2.58329e-167	92.18	1	C:GO:0016020	C:membrane			no IPS match	no IPS match	no IPS match	ENOG		3.2e-98	Sarcocystidae		0
TGME49_208722	[INTERPRO, BLASTED, MAPPED, ANNOTATED]	TPA: phosphatase, putative	91	5	2.3775e-56	99.34	12	P:GO:0030335; P:GO:0032879; P:GO:0035335; F:GO:0004725; C:GO:0005634; C:GO:0005737; C:GO:0005769; C:GO:0005783; C:GO:0005819; C:GO:0009898	P:positive regulation of cell migration; P:regulation of localization; P:peptidyl-tyrosine dephosphorylation; F:protein tyrosine phosphatase activity; C:nucleus; C:cytoplasm; C:early endosome; C:endoplasmic reticulum; C:spindle; C:cytoplasmic side of plasma membrane	EC:3.1; EC:3.1.3.48; EC:3; EC:3.1.3	Acting on ester bonds; protein-tyrosine-phosphatase; Hydrolases; Acting on ester bonds	no IPS match	no IPS match	no IPS match	KOG,ENOG	Dual specificity phosphatase, catalytic domain	2.1e-31	Sarcocystidae	EC:3.1.3.48	9	C:GO:0005819; C:GO:0009898; C:GO:0005783; C:GO:0005634; C:GO:0005769; P:GO:0035335; P:GO:0032879; F:GO:0004725; P:GO:0030335	C:endoplasmic reticulum; C:early endosome; C:spindle; P:regulation of localization; P:peptidyl-tyrosine dephosphorylation; C:cytoplasmic side of plasma membrane; P:positive regulation of cell migration; C:nucleus; F:protein tyrosine phosphatase activity	K18041
TGME49_208760	[INTERPRO, BLASTED]	hypothetical protein TgIb.1120c	861	20	0	80.24						no IPS match	no IPS match	no IPS match	ENOG		6.7e-300	Sarcocystidae		0
TGME49_208770	[INTERPRO, BLASTED]	hypothetical protein TGME49_208770	160	9	2.34798e-112	91.1						no IPS match	no IPS match	no IPS match	ENOG		3.5e-85	Sarcocystidae		0
TGME49_208910	[INTERPRO, BLASTED]	hypothetical protein TGME49_208910	3446	16	0	89.67						no IPS match	no IPS match	no IPS match	ENOG		0	Sarcocystidae		0
TGME49_208980	[INTERPRO, BLASTED, MAPPED, ANNOTATED]	putative transmembrane protein	268	13	0	95.31	1	C:GO:0016020	C:membrane			no IPS match	no IPS match	no IPS match	ENOG		7.8e-122	Sarcocystidae		0
TGME49_208990	[INTERPRO, BLASTED, MAPPED, ANNOTATED]	DExH-box splicing factor-binding site protein	426	20	0	86.05	2	P:GO:0000398; C:GO:0005681	P:mRNA splicing, via spliceosome; C:spliceosomal complex			IPR026822 (PFAM); IPR045166 (PANTHER)	P:GO:0000398; C:GO:0005681	P:mRNA splicing, via spliceosome; C:spliceosomal complex	ENOG	G-patch domain	1.4e-202	Sarcocystidae		0
TGME49_209005	[INTERPRO, BLASTED]	hypothetical protein TGME49_209005	73	2	1.39147e-45	100						no IPS match	no IPS match	no IPS match
TGME49_209020	[INTERPRO, BLASTED, MAPPED, ANNOTATED]	hypothetical protein TGME49_209020	934	19	0	87.06	1	C:GO:0016020	C:membrane			no IPS match	no IPS match	no IPS match	ENOG		0	Sarcocystidae		0
TGME49_209070	[INTERPRO, BLASTED, MAPPED, ANNOTATED]	TPA: hypothetical protein BN1205_039395	330	18	1.53581e-161	91.13	1	P:GO:0106035	P:protein maturation by [4Fe-4S] cluster transfer			G3DSA:6.10.250.1280 (GENE3D); IPR034904 (G3DSA:3.30.300.GENE3D); IPR039796 (PANTHER)	P:GO:0106035	P:protein maturation by [4Fe-4S] cluster transfer	ENOG		5.8e-135	Sarcocystidae		0
TGME49_209095	[INTERPRO, BLASTED]	hypothetical protein TGME49_209095	166	10	1.1448e-80	98.13						no IPS match	no IPS match	no IPS match
TGME49_209170	[INTERPRO, BLASTED]	hypothetical protein TGME49_209170	416	9	0	85.44						no IPS match	no IPS match	no IPS match	ENOG		1.6e-235	Sarcocystidae		0
TGME49_209200	[INTERPRO, BLASTED]	Conserved Plasmodium protein, related	753	20	0	89.99						no IPS match	no IPS match	no IPS match	ENOG		0	Sarcocystidae		0
TGME49_209250	[INTERPRO, BLASTED, MAPPED, ANNOTATED]	putative transmembrane protein	1018	20	0	86.8	1	C:GO:0016020	C:membrane			no IPS match	no IPS match	no IPS match	ENOG		0	Sarcocystidae		0
TGME49_209420	[INTERPRO, BLASTED]	hypothetical protein TGME49_209420	250	8	3.81913e-91	84.47						no IPS match	no IPS match	no IPS match	ENOG		7.1e-101	Sarcocystidae		0
TGME49_209440	[INTERPRO, BLASTED]	hypothetical protein TGME49_209440	3633	18	0	89.73						no IPS match	no IPS match	no IPS match	ENOG		0	Sarcocystidae		0
TGME49_209460	[INTERPRO, BLASTED]	hypothetical protein TGME49_209460	725	15	0	92.1						no IPS match	no IPS match	no IPS match	ENOG		0	Sarcocystidae		0
TGME49_209470	[INTERPRO, BLASTED, MAPPED]	putative with signal peptide plus Thr stretch, mucin, related protein	520	20	0	65.39	1	C:GO:0016020	C:membrane			no IPS match	no IPS match	no IPS match	ENOG		2.6e-299	Sarcocystidae		0
TGME49_209490	[INTERPRO, BLASTED]	hypothetical protein TGME49_209490	505	20	0	79.03						no IPS match	no IPS match	no IPS match	ENOG		3.4e-288	Sarcocystidae		0
TGME49_209500	[INTERPRO, BLASTED]	hypothetical protein TGME49_209500	3082	20	0	93.92						no IPS match	no IPS match	no IPS match	ENOG		0	Sarcocystidae		0
TGME49_209510	[INTERPRO, BLASTED, MAPPED]	putative transmembrane protein	742	12	0	89.78	1	C:GO:0016020	C:membrane			no IPS match	no IPS match	no IPS match	ENOG		0	Sarcocystidae		0
TGME49_209515	[INTERPRO, BLASTED, MAPPED]	hypothetical protein CSUI_001418	464	8	5.91904e-164	88.2	1	P:GO:0006629	P:lipid metabolic process			IPR002921 (PFAM); IPR029058 (G3DSA:3.40.50.GENE3D); IPR029058 (SUPERFAMILY)	P:GO:0006629	P:lipid metabolic process
TGME49_209530	[INTERPRO, BLASTED, MAPPED, ANNOTATED]	presenilin enhancer-2 subunit of gamma secretase	437	18	4.06112e-90	93.89	1	C:GO:0016020	C:membrane			IPR019379 (PFAM)	no GO terms	no GO terms	ENOG	Presenilin enhancer-2 subunit of gamma secretase	1.4e-64	Sarcocystidae		0
TGME49_209540	[INTERPRO, BLASTED, MAPPED, ANNOTATED]	hypothetical protein TGME49_209540	1534	18	0	90.4	3	P:GO:0016973; P:GO:0071763; C:GO:0005635	P:poly(A)+ mRNA export from nucleus; P:nuclear membrane organization; C:nuclear envelope			no IPS match	no IPS match	no IPS match	ENOG		0	Sarcocystidae		0
TGME49_209550	[INTERPRO, BLASTED, MAPPED, ANNOTATED]	hypothetical protein TGME49_209550	1306	20	0	94.71	7	P:GO:0000963; P:GO:0044528; P:GO:1901259; F:GO:0003723; C:GO:0005759; C:GO:0009507; C:GO:0035770	P:mitochondrial RNA processing; P:regulation of mitochondrial mRNA stability; P:chloroplast rRNA processing; F:RNA binding; C:mitochondrial matrix; C:chloroplast; C:ribonucleoprotein granule			no IPS match	no IPS match	no IPS match	ENOG		0	Sarcocystidae		0
TGME49_209560	[INTERPRO, BLASTED]	hypothetical protein TgIb.1720c	1487	11	0	95.23						no IPS match	no IPS match	no IPS match	ENOG		2.7e-264	Sarcocystidae		0
TGME49_209583	[INTERPRO, BLASTED, MAPPED, ANNOTATED]	putative transmembrane protein	139	8	9.08336e-80	80.54	1	C:GO:0016020	C:membrane			no IPS match	no IPS match	no IPS match
TGME49_209585	[INTERPRO, BLASTED, MAPPED, ANNOTATED]	putative transmembrane protein	332	9	0	73.79	1	C:GO:0016020	C:membrane			no IPS match	no IPS match	no IPS match	KOG,ENOG	Serine/Threonine protein kinases, catalytic domain	0.034	Ciliophora	EC:2.7.11.1	0			K06515,K13303,K15377,K19800	map04068,map04138,map04151,map04213,map05231
TGME49_209590	[INTERPRO, BLASTED, MAPPED, ANNOTATED]	putative transmembrane protein	258	20	1.60834e-177	63.45	1	C:GO:0016020	C:membrane			no IPS match	no IPS match	no IPS match	ENOG		3.3e-146	Sarcocystidae		0
TGME49_209600	[INTERPRO, BLASTED]	hypothetical protein TGME49_209600	384	20	0	76						IPR011993 (G3DSA:2.30.29.GENE3D)	no GO terms	no GO terms	ENOG		4.9e-202	Sarcocystidae		0
TGME49_209640	[INTERPRO, BLASTED]	hypothetical protein TGCOUG_209640	432	16	6.05569e-172	93.39						no IPS match	no IPS match	no IPS match	ENOG		7.1e-125	Sarcocystidae		0
TGME49_209680	[INTERPRO, BLASTED]	hypothetical protein TGME49_209680	595	20	0	92.6						no IPS match	no IPS match	no IPS match	ENOG		4.9e-241	Sarcocystidae		0
TGME49_209700	[INTERPRO, BLASTED, MAPPED, ANNOTATED]	hypothetical protein, expressed	178	14	9.82269e-112	81.15	1	C:GO:0016020	C:membrane			no IPS match	no IPS match	no IPS match	ENOG		1.1e-92	Sarcocystidae		0
TGME49_209705	[INTERPRO, BLASTED]	hypothetical protein TGME49_209705	268	9	0	94.96						no IPS match	no IPS match	no IPS match
TGME49_209730	[INTERPRO, BLASTED, MAPPED]	SNF2 family amine-terminal domain protein	1465	20	0	91.33	3	F:GO:0003677; F:GO:0008094; C:GO:0005634	F:DNA binding; F:ATP-dependent activity, acting on DNA; C:nucleus			IPR038718 (G3DSA:3.40.50.GENE3D)	no GO terms	no GO terms	ENOG		0	Sarcocystidae		0
TGME49_209740	[INTERPRO, BLASTED]	hypothetical protein TGME49_209740	223	9	1.02928e-132	91.67						no IPS match	no IPS match	no IPS match	ENOG		2.7e-96	Sarcocystidae		0
TGME49_209780	[INTERPRO, BLASTED]	hypothetical protein TGRH88_021400	166	9	5.49918e-74	98.56						no IPS match	no IPS match	no IPS match
TGME49_209810	[INTERPRO, BLASTED, MAPPED, ANNOTATED]	putative transmembrane protein	337	19	0	69.02	1	C:GO:0016020	C:membrane			PS51257 (PROSITE_PROFILES)	no GO terms	no GO terms	ENOG		1.2e-180	Sarcocystidae		0
TGME49_209890	[INTERPRO, BLASTED, MAPPED, ANNOTATED]	cyclin, putative	193	20	2.98054e-124	87.7	7	P:GO:0006357; P:GO:0045893; F:GO:0003713; F:GO:0016538; F:GO:0031490; C:GO:0005634; C:GO:0016020	P:regulation of transcription by RNA polymerase II; P:positive regulation of DNA-templated transcription; F:transcription coactivator activity; F:cyclin-dependent protein serine/threonine kinase regulator activity; F:chromatin DNA binding; C:nucleus; C:membrane			no IPS match	no IPS match	no IPS match	ENOG	Encoded by	1e-99	Sarcocystidae		0
TGME49_209900	[INTERPRO, BLASTED]	hypothetical protein TGME49_209900	143	20	2.63189e-103	68.06						no IPS match	no IPS match	no IPS match	ENOG		2.5e-79	Sarcocystidae		0
TGME49_209930	[INTERPRO, BLASTED, MAPPED]	transmembrane protein	454	20	1.41934e-115	74.66	1	C:GO:0016020	C:membrane			no IPS match	no IPS match	no IPS match	ENOG		4.6e-175	Sarcocystidae		0
TGME49_209945	[INTERPRO, BLASTED, MAPPED, ANNOTATED]	putative transmembrane protein	58	7	1.30399e-32	87.75	1	C:GO:0016020	C:membrane			no IPS match	no IPS match	no IPS match
TGME49_210100	[INTERPRO, BLASTED]	hypothetical protein TGME49_210100	129	2	1.89945e-89	99.61						no IPS match	no IPS match	no IPS match
TGME49_210210	[INTERPRO, BLASTED]	hypothetical protein TGME49_210210	2747	9	0	94.98						no IPS match	no IPS match	no IPS match	ENOG		0	Sarcocystidae		0
TGME49_210270	[INTERPRO, BLASTED, MAPPED, ANNOTATED]	hypothetical protein TGARI_210270	2048	15	0	91.01	5	P:GO:0031122; F:GO:0051010; C:GO:0005634; C:GO:0005938; C:GO:0035371	P:cytoplasmic microtubule organization; F:microtubule plus-end binding; C:nucleus; C:cell cortex; C:microtubule plus-end			no IPS match	no IPS match	no IPS match	ENOG		0	Sarcocystidae		0
TGME49_210310	[INTERPRO, BLASTED, MAPPED, ANNOTATED]	histone methylation protein DOT1	2377	20	0	82.15	2	P:GO:0006338; F:GO:0031151	P:chromatin remodeling; F:histone H3K79 methyltransferase activity	EC:2.1.1	Transferring one-carbon groups	IPR029063 (G3DSA:3.40.50.GENE3D); IPR025789 (PFAM); PIRSR017570-1 (PIRSR); IPR029063 (SUPERFAMILY)	F:GO:0031151	F:histone H3K79 methyltransferase activity	ENOG	Histone methylation protein DOT1	0	Sarcocystidae		0
TGME49_210345	[INTERPRO, BLASTED, MAPPED, ANNOTATED]	alpha/beta hydrolase family protein	3457	20	0	83.78	11	P:GO:0006660; P:GO:0052651; P:GO:0098734; P:GO:0099175; F:GO:0003729; F:GO:0004622; F:GO:0008474; F:GO:0047372; C:GO:0005789; C:GO:0005886; C:GO:0010008	P:phosphatidylserine catabolic process; P:monoacylglycerol catabolic process; P:macromolecule depalmitoylation; P:regulation of postsynapse organization; F:mRNA binding; F:lysophospholipase activity; F:palmitoyl-(protein) hydrolase activity; F:acylglycerol lipase activity; C:endoplasmic reticulum membrane; C:plasma membrane; C:endosome membrane	EC:3.1.2.22; EC:3.1.1.23; EC:3.1.1.5	palmitoyl-protein hydrolase; acylglycerol lipase; lysophospholipase	IPR029058 (G3DSA:3.40.50.GENE3D); PTHR12277 (PANTHER); IPR029058 (SUPERFAMILY)	no GO terms	no GO terms	COG,KOG,ENOG	palmitoyl-(protein) hydrolase activity	0	Sarcocystidae		0
TGME49_210400	[INTERPRO, BLASTED, MAPPED, ANNOTATED]	putative transmembrane protein	1354	13	0	92.97	1	C:GO:0016020	C:membrane			no IPS match	no IPS match	no IPS match	ENOG		0	Sarcocystidae		0
TGME49_210412	[INTERPRO, BLASTED, MAPPED, ANNOTATED]	high mobility group protein	204	20	4.01593e-120	68.34	1	C:GO:0016020	C:membrane			no IPS match	no IPS match	no IPS match	ENOG		5.6e-104	Sarcocystidae		0
TGME49_210420	[INTERPRO, BLASTED, MAPPED, ANNOTATED]	putative transmembrane protein	342	16	0	76.11	1	C:GO:0016020	C:membrane			no IPS match	no IPS match	no IPS match	ENOG		5.9e-175	Sarcocystidae		0
TGME49_210450	[INTERPRO, BLASTED, MAPPED, ANNOTATED]	putative transmembrane protein	399	6	0	93.95	1	C:GO:0016020	C:membrane			no IPS match	no IPS match	no IPS match	ENOG		5.4e-212	Sarcocystidae		0
TGME49_210490	[INTERPRO, BLASTED]	hypothetical protein TGME49_210490	924	14	0	84.35						no IPS match	no IPS match	no IPS match	ENOG		0	Apicomplexa		0
TGME49_210682	[INTERPRO, BLASTED]	hypothetical protein TGME49_210682	59	3	2.0777e-18	93.99						no IPS match	no IPS match	no IPS match
TGME49_210715	[INTERPRO, BLASTED]	hypothetical protein TGME49_210715	75	5	1.17661e-33	97.91						no IPS match	no IPS match	no IPS match
TGME49_210740	[INTERPRO, BLASTED]	hypothetical protein TGME49_210740	250	5	6.7195e-141	99.82						no IPS match	no IPS match	no IPS match	ENOG		8.9e-112	Sarcocystidae		0
TGME49_210770	[INTERPRO, BLASTED]	hypothetical protein TGME49_210770	324	9	0	95.33						no IPS match	no IPS match	no IPS match	ENOG		1.7e-115	Sarcocystidae		0
TGME49_210783	[INTERPRO, BLASTED]	hypothetical protein TGME49_210783	79	2	2.7317e-49	99.37						no IPS match	no IPS match	no IPS match
TGME49_210815	[INTERPRO, BLASTED]	hypothetical protein TGME49_210815	161	5	5.49696e-115	99.5						no IPS match	no IPS match	no IPS match
TGME49_210970	[INTERPRO, BLASTED, MAPPED, ANNOTATED]	putative transmembrane protein	199	7	6.04205e-88	98.77	1	C:GO:0016020	C:membrane			no IPS match	no IPS match	no IPS match
TGME49_210975	[INTERPRO, BLASTED, MAPPED, ANNOTATED]	putative transmembrane protein	311	9	6.12287e-169	98.41	1	C:GO:0016020	C:membrane			no IPS match	no IPS match	no IPS match
TGME49_211030	[INTERPRO, BLASTED]	hypothetical protein TGME49_211030	191	20	1.11294e-137	70.47						no IPS match	no IPS match	no IPS match	ENOG		2e-108	Sarcocystidae		0
TGME49_211060	[INTERPRO, BLASTED, MAPPED, ANNOTATED]	Chain W, ATPTG16	106	20	4.82595e-71	72.48	1	C:GO:0016020	C:membrane			no IPS match	no IPS match	no IPS match	ENOG		3.6e-54	Sarcocystidae		0
TGME49_211080	[INTERPRO, BLASTED]	hypothetical protein TGME49_211080	152	6	2.27615e-92	97.37						no IPS match	no IPS match	no IPS match
TGME49_211150	[INTERPRO, BLASTED, MAPPED, ANNOTATED]	hypothetical protein TGME49_211150	2517	20	0	96.53	5	P:GO:0006623; P:GO:0007005; P:GO:0045053; P:GO:0045324; C:GO:0019898	P:protein targeting to vacuole; P:mitochondrion organization; P:protein retention in Golgi apparatus; P:late endosome to vacuole transport; C:extrinsic component of membrane			PTHR13491 (PANTHER)	no GO terms	no GO terms	ENOG		0	Sarcocystidae		0
TGME49_211250	[INTERPRO, BLASTED]	hypothetical protein TGVEG_211250	272	10	8.44828e-163	67.39						no IPS match	no IPS match	no IPS match	ENOG		1.9e-144	Sarcocystidae		0
TGME49_211280	[INTERPRO, BLASTED]	hypothetical protein TGME49_211280	919	14	0	89.6						no IPS match	no IPS match	no IPS match	ENOG		9.9E-310	Sarcocystidae		0
TGME49_211320	[INTERPRO, BLASTED]	putative C protein immunoglobulin-A-binding beta antigen	396	12	2.02802e-68	76.81						no IPS match	no IPS match	no IPS match	ENOG		2e-73	Sarcocystidae		0
TGME49_211340	[INTERPRO, BLASTED]	hypothetical protein TGME49_211340	2239	15	0	91.24						no IPS match	no IPS match	no IPS match	ENOG		0	Sarcocystidae		0
TGME49_211360	[INTERPRO, BLASTED]	hypothetical protein TGME49_211360	1093	13	0	88.06						no IPS match	no IPS match	no IPS match	ENOG		0	Sarcocystidae		0
TGME49_211385	[INTERPRO, BLASTED, MAPPED]	hypothetical protein TGME49_211385	610	20	2.56235e-156	59.44	1	C:GO:0016020	C:membrane			no IPS match	no IPS match	no IPS match
TGME49_211440	[INTERPRO, BLASTED, MAPPED, ANNOTATED]	putative transmembrane protein	1665	20	0	95.09	1	C:GO:0016020	C:membrane			no IPS match	no IPS match	no IPS match	ENOG		0	Sarcocystidae		0
TGME49_211600	[INTERPRO, BLASTED]	Conserved Plasmodium protein, related	2243	20	0	82.83						no IPS match	no IPS match	no IPS match	ENOG		0	Sarcocystidae		0
TGME49_211610	[INTERPRO, BLASTED]	hypothetical protein TGME49_211610	1245	15	0	87.85						no IPS match	no IPS match	no IPS match	ENOG		0	Sarcocystidae		0
TGME49_211630	[INTERPRO, BLASTED]	hypothetical protein TGME49_211630	213	10	7.01709e-124	87.58						no IPS match	no IPS match	no IPS match	ENOG		1.7e-111	Sarcocystidae		0
TGME49_211650	[INTERPRO, BLASTED]	hypothetical protein TGARI_211650	701	11	0	94.1						no IPS match	no IPS match	no IPS match	ENOG		7.9e-259	Sarcocystidae		0
TGME49_211675	[INTERPRO, BLASTED]	hypothetical protein TGME49_211675	262	5	7.48286e-177	99.6						no IPS match	no IPS match	no IPS match
TGME49_211695	[INTERPRO, BLASTED]	hypothetical protein TGME49_211695	374	8	1.32486e-166	99.32						no IPS match	no IPS match	no IPS match
TGME49_211850	[INTERPRO, BLASTED, MAPPED]	Nucleolin 1	173	20	3.25232e-106	73.2	5	P:GO:1901259; F:GO:0003723; F:GO:0003729; C:GO:0005634; C:GO:0009535	P:chloroplast rRNA processing; F:RNA binding; F:mRNA binding; C:nucleus; C:chloroplast thylakoid membrane			no IPS match	no IPS match	no IPS match	ENOG		1.9e-89	Sarcocystidae		0
TGME49_211860	[INTERPRO, BLASTED, MAPPED, ANNOTATED]	putative transmembrane protein	633	9	0	94.96	1	C:GO:0016020	C:membrane			no IPS match	no IPS match	no IPS match	ENOG		2.8e-255	Sarcocystidae		0
TGME49_211920	[INTERPRO, BLASTED]	hypothetical protein TGME49_211920	217	20	4.38987e-71	99.05						no IPS match	no IPS match	no IPS match	ENOG		1.1e-86	Sarcocystidae		0
TGME49_212030	[INTERPRO, BLASTED]	hypothetical protein TGME49_212030	499	20	0	96.62						no IPS match	no IPS match	no IPS match	ENOG		5e-231	Sarcocystidae		0
TGME49_212090	[INTERPRO, BLASTED, MAPPED, ANNOTATED]	hypothetical protein TGME49_212090	632	10	0	90.08	1	C:GO:0005847	C:mRNA cleavage and polyadenylation specificity factor complex			IPR051187 (PANTHER)	C:GO:0005847	C:mRNA cleavage and polyadenylation specificity factor complex	ENOG	vestibular reflex	1.1e-270	Sarcocystidae		0
TGME49_212140	[INTERPRO, BLASTED, MAPPED, ANNOTATED]	Conserved Plasmodium protein, related	1771	20	0	87.44	2	F:GO:0035241	F:protein-arginine omega-N monomethyltransferase activity	EC:2.1; EC:2; EC:2.1.1.321; EC:2.1.1	Transferring one-carbon groups; Transferases; type III protein arginine methyltransferase; Transferring one-carbon groups	IPR029063 (G3DSA:3.40.50.GENE3D); PIRSR037350-1 (PIRSR); IPR029063 (SUPERFAMILY)	no GO terms	no GO terms	ENOG		0	Sarcocystidae		0
TGME49_212160	[INTERPRO, BLASTED]	hypothetical protein TGME49_212160	229	7	2.93033e-137	94.97						no IPS match	no IPS match	no IPS match	ENOG		9.3e-116	Sarcocystidae		0
TGME49_212180	[INTERPRO, BLASTED]	hypothetical protein TGME49_212180	353	10	0	94.45						no IPS match	no IPS match	no IPS match	ENOG		2e-181	Sarcocystidae		0
TGME49_212200	[INTERPRO, BLASTED, MAPPED, ANNOTATED]	magnesium transporter NIPA	413	20	0	76.56	3	P:GO:1903830; F:GO:0015095; C:GO:0016020	P:magnesium ion transmembrane transport; F:magnesium ion transmembrane transporter activity; C:membrane			IPR008521 (PFAM); IPR008521 (PANTHER); SSF103481 (SUPERFAMILY)	P:GO:0015693; F:GO:0015095; C:GO:0016020	P:magnesium ion transport; F:magnesium ion transmembrane transporter activity; C:membrane	KOG,ENOG	Magnesium transporter NIPA	1.5e-204	Sarcocystidae		0
TGME49_212210	[INTERPRO, BLASTED]	hypothetical protein TGME49_212210	280	8	1.8141e-127	86.86						no IPS match	no IPS match	no IPS match	ENOG		6.5e-95	Sarcocystidae		0
TGME49_212275	[INTERPRO, BLASTED, MAPPED, ANNOTATED]	hypothetical protein TGME49_212275	407	20	1.63008e-163	67.75	1	C:GO:0016020	C:membrane			no IPS match	no IPS match	no IPS match	ENOG		5.7e-124	Apicomplexa		0
TGME49_212280	[INTERPRO, BLASTED]	hypothetical protein TGME49_212280	230	5	1.51401e-171	99.91						no IPS match	no IPS match	no IPS match
TGME49_212420	[INTERPRO, BLASTED]	hypothetical protein TGME49_212420	185	9	1.15044e-105	99.07						no IPS match	no IPS match	no IPS match	ENOG		7.8e-89	Sarcocystidae		0
TGME49_212725	[INTERPRO, BLASTED, MAPPED]	hypothetical protein TGME49_212725	220	20	1.88724e-131	61.64	2	F:GO:0004672; F:GO:0005524	F:protein kinase activity; F:ATP binding			no IPS match	no IPS match	no IPS match	ENOG		5.4e-105	Sarcocystidae		0
TGME49_212760	[INTERPRO, BLASTED, MAPPED]	Chromosome I, complete genome, related	73	20	1.48011e-46	74.48	1	C:GO:0016020	C:membrane			no IPS match	no IPS match	no IPS match	ENOG		3.4e-35	Sarcocystidae		0
TGME49_212775	[INTERPRO, BLASTED]	hypothetical protein TGME49_212775	154	3	1.14941e-109	99.57						no IPS match	no IPS match	no IPS match
TGME49_212780	[INTERPRO, BLASTED]	hypothetical protein TGME49_212780	2334	12	0	90.23						no IPS match	no IPS match	no IPS match	ENOG		0	Sarcocystidae		0
TGME49_212810	[INTERPRO, BLASTED]	hypothetical protein TGME49_212810	5081	19	0	93.72						PTHR34491 (PANTHER)	no GO terms	no GO terms	ENOG		0	Sarcocystidae		0
TGME49_212860	[INTERPRO, BLASTED, MAPPED, ANNOTATED]	transcription factor E(Y)2	972	20	1.55532e-63	98.14	16	P:GO:0006406; P:GO:0006511; P:GO:0016567; P:GO:0045893; F:GO:0003713; F:GO:0061630; C:GO:0000124; C:GO:0005643	P:mRNA export from nucleus; P:ubiquitin-dependent protein catabolic process; P:protein ubiquitination; P:positive regulation of DNA-templated transcription; F:transcription coactivator activity; F:ubiquitin protein ligase activity; C:SAGA complex; C:nuclear pore	EC:2.3; EC:2; EC:2.3.2	Acyltransferases; Transferases; Acyltransferases	IPR052293 (PANTHER)	no GO terms	no GO terms	ENOG	response to salt stress	1.8e-131	Sarcocystidae		0
TGME49_212900	[INTERPRO, BLASTED]	hypothetical protein TGME49_212900	1155	14	0	92.97						no IPS match	no IPS match	no IPS match	ENOG		0	Sarcocystidae		0
TGME49_212920	[INTERPRO, BLASTED]	WPP motif-containing protein	198	20	1.02337e-125	84.51						no IPS match	no IPS match	no IPS match	ENOG		2.1e-111	Sarcocystidae		0
TGME49_212937	[INTERPRO, BLASTED]	TPA: hypothetical protein BN1205_035295	349	10	1.48282e-76	94.68						no IPS match	no IPS match	no IPS match	ENOG		5e-145	Sarcocystidae		0
TGME49_213010	[INTERPRO, BLASTED, MAPPED]	rhd3 sey1 family gtpase involved in the er-to-golgi traffic	1036	20	0	92.37	1	C:GO:0016020	C:membrane			no IPS match	no IPS match	no IPS match	ENOG		0	Sarcocystidae		0
TGME49_213050	[INTERPRO, BLASTED, MAPPED, ANNOTATED]	hypothetical protein TGME49_213050	178	7	2.94634e-125	99.44	1	C:GO:0016020	C:membrane			no IPS match	no IPS match	no IPS match	ENOG		4.4e-89	Sarcocystidae		0
TGME49_213065	[INTERPRO, BLASTED]	hypothetical protein TGME49_213065	90	2	2.48381e-42	100						no IPS match	no IPS match	no IPS match
TGME49_213100	[INTERPRO, BLASTED, MAPPED, ANNOTATED]	YGGT family protein	466	20	0	85.22	1	C:GO:0016020	C:membrane			IPR003425 (PFAM)	C:GO:0016020	C:membrane	COG,ENOG	YGGT family	3.3e-237	Sarcocystidae		0
TGME49_213115	[INTERPRO, BLASTED, MAPPED, ANNOTATED]	ATP-dependent Clp protease proteolytic subunit	592	20	1.18791e-106	83.22	10	P:GO:0006515; F:GO:0004176; F:GO:0004252; F:GO:0051117; C:GO:0009368	P:protein quality control for misfolded or incompletely synthesized proteins; F:ATP-dependent peptidase activity; F:serine-type endopeptidase activity; F:ATPase binding; C:endopeptidase Clp complex	EC:3.4.21; EC:3.4; EC:3	Acting on peptide bonds (peptidases); Acting on peptide bonds (peptidases); Hydrolases	IPR023562 (PFAM); G3DSA:3.90.226.10 (GENE3D); IPR023562 (PANTHER); IPR029045 (SUPERFAMILY)	P:GO:0006515; F:GO:0004176; F:GO:0004252; F:GO:0051117; C:GO:0009368	P:protein quality control for misfolded or incompletely synthesized proteins; F:ATP-dependent peptidase activity; F:serine-type endopeptidase activity; F:ATPase binding; C:endopeptidase Clp complex	ENOG		4.5e-162	Sarcocystidae		0
TGME49_213240	[INTERPRO, BLASTED, MAPPED, ANNOTATED]	putative transmembrane protein	788	12	0	94.09	1	C:GO:0016020	C:membrane			no IPS match	no IPS match	no IPS match	ENOG		4.7e-292	Sarcocystidae		0
TGME49_213255	[INTERPRO, BLASTED, MAPPED, ANNOTATED]	GK19899, related	3233	13	0	91.46	1	C:GO:0005856	C:cytoskeleton			no IPS match	no IPS match	no IPS match	ENOG		0	Sarcocystidae		0
TGME49_213290	[INTERPRO, BLASTED]	hypothetical protein TGME49_213290	559	10	0	95.29						no IPS match	no IPS match	no IPS match	ENOG		1.8e-173	Sarcocystidae		0
TGME49_213300	[INTERPRO, BLASTED]	TPA: hypothetical protein BN1205_035040	5036	20	0	77.17						IPR039844 (PANTHER)	P:GO:0000463; P:GO:0000466; C:GO:0005730	P:maturation of LSU-rRNA from tricistronic rRNA transcript (SSU-rRNA, 5.8S rRNA, LSU-rRNA); P:maturation of 5.8S rRNA from tricistronic rRNA transcript (SSU-rRNA, 5.8S rRNA, LSU-rRNA); C:nucleolus	ENOG		0	Sarcocystidae		0
TGME49_213310	[INTERPRO, BLASTED, MAPPED, ANNOTATED]	putative transmembrane protein	1603	20	0	88.76	1	C:GO:0016020	C:membrane			no IPS match	no IPS match	no IPS match	ENOG	Helix-hairpin-helix DNA-binding motif class 1	0	Sarcocystidae		0
TGME49_213380	[INTERPRO, BLASTED]	hypothetical protein TGME49_213380	247	7	1.87428e-174	99.47						no IPS match	no IPS match	no IPS match
TGME49_213388	[INTERPRO, BLASTED]	TPA: plectin, putative	1342	12	0	90.76						no IPS match	no IPS match	no IPS match	ENOG	Encoded by	0	Sarcocystidae		0
TGME49_213415	[INTERPRO, BLASTED]	hypothetical protein TGME49_213415	120	7	3.44529e-79	97.5						no IPS match	no IPS match	no IPS match
TGME49_213460	[INTERPRO, BLASTED]	putative transmembrane protein	1759	20	0	86.87						no IPS match	no IPS match	no IPS match	ENOG		0	Sarcocystidae		0
TGME49_213480	[INTERPRO, BLASTED]	hypothetical protein TGME49_213480	1482	20	0	77.8						no IPS match	no IPS match	no IPS match	ENOG		0	Sarcocystidae		0
TGME49_213490	[INTERPRO, BLASTED, MAPPED, ANNOTATED]	putative transmembrane protein	319	20	0	72.98	2	C:GO:0005634; C:GO:0016020	C:nucleus; C:membrane			no IPS match	no IPS match	no IPS match	ENOG		2.6e-180	Sarcocystidae		0
TGME49_213530	[INTERPRO, BLASTED, MAPPED, ANNOTATED]	TPA: hypothetical protein BN1205_034790	1135	20	0	71.47	4	P:GO:0009987; P:GO:0043170; P:GO:0044238; C:GO:0043229	P:cellular process; P:macromolecule metabolic process; P:primary metabolic process; C:intracellular organelle			IPR043136 (G3DSA:2.60.120.GENE3D); IPR001870 (PROSITE_PROFILES)	no GO terms	no GO terms	ENOG		0	Sarcocystidae		0
TGME49_213560	[INTERPRO, BLASTED]	hypothetical protein TGME49_213560	755	11	0	95.33						no IPS match	no IPS match	no IPS match	ENOG		0	Sarcocystidae		0
TGME49_213570	[INTERPRO, BLASTED, MAPPED, ANNOTATED]	putative transmembrane protein	290	7	1.45671e-139	88.86	1	C:GO:0016020	C:membrane			no IPS match	no IPS match	no IPS match	ENOG		4.7e-149	Sarcocystidae		0
TGME49_213590	[INTERPRO, BLASTED]	TPA: hypothetical protein BN1205_034740	107	8	6.2803e-70	76.21						no IPS match	no IPS match	no IPS match
TGME49_213600	[INTERPRO, BLASTED]	hypothetical protein TGME49_213600	685	20	0	73.99						no IPS match	no IPS match	no IPS match	ENOG		0	Sarcocystidae		0
TGME49_213610	[INTERPRO, BLASTED, MAPPED, ANNOTATED]	putative transmembrane protein	1015	11	0	93.48	1	C:GO:0016020	C:membrane			no IPS match	no IPS match	no IPS match	ENOG		0	Sarcocystidae		0
TGME49_213635	[INTERPRO, BLASTED]	TPA: splicing factor, arginine/serine-rich 4,putative	3010	9	0	99.25						no IPS match	no IPS match	no IPS match
TGME49_213746	[INTERPRO, BLASTED, MAPPED, ANNOTATED]	putative transmembrane protein	226	20	1.3011e-155	69.11	1	C:GO:0016020	C:membrane			no IPS match	no IPS match	no IPS match	ENOG	Herpesviridae ul52 ul70 dna primase	6.6e-130	Sarcocystidae		0
TGME49_213748	[INTERPRO, BLASTED]	hypothetical protein TGME49_213748	225	5	4.41536e-160	98.8						no IPS match	no IPS match	no IPS match
TGME49_213760	[INTERPRO, BLASTED, MAPPED, ANNOTATED]	TPA: hypothetical protein BN1205_034550	590	12	0	87.61	1	C:GO:0016020	C:membrane			no IPS match	no IPS match	no IPS match	ENOG		9.2e-301	Sarcocystidae		0
TGME49_213820	[INTERPRO, BLASTED]	hypothetical protein TGME49_213820	881	10	0	92.95						no IPS match	no IPS match	no IPS match	ENOG		0	Sarcocystidae		0
TGME49_213860	[INTERPRO, BLASTED]	TPA: hypothetical protein BN1205_034350	332	10	1.39159e-160	91.44						no IPS match	no IPS match	no IPS match	ENOG		7.9e-124	Sarcocystidae		0
TGME49_213880	[INTERPRO, BLASTED, MAPPED]	hypothetical protein TGME49_213880	246	5	3.20355e-99	91.49	1	F:GO:0005509	F:calcium ion binding			no IPS match	no IPS match	no IPS match	ENOG		6.1e-97	Sarcocystidae		0
TGME49_213910	[INTERPRO, BLASTED, MAPPED, ANNOTATED]	putative transmembrane protein	403	20	0	73.62	4	F:GO:0016746; C:GO:0016020	F:acyltransferase activity; C:membrane	EC:2.3; EC:2	Acyltransferases; Transferases	PTHR23063 (PANTHER)	no GO terms	no GO terms	ENOG		3.2e-196	Sarcocystidae		0
TGME49_213920	[INTERPRO, BLASTED]	hypothetical protein TGME49_213920	1152	20	0	95.99						no IPS match	no IPS match	no IPS match	ENOG		0	Sarcocystidae		0
TGME49_213950	[INTERPRO, BLASTED, MAPPED, ANNOTATED]	putative transmembrane protein	720	11	0	87.13	1	C:GO:0016020	C:membrane			no IPS match	no IPS match	no IPS match	ENOG		0	Sarcocystidae		0
TGME49_214070	[INTERPRO, BLASTED]	hypothetical protein TGME49_214070	146	3	1.29416e-100	99.69						no IPS match	no IPS match	no IPS match
TGME49_214100	[INTERPRO, BLASTED]	hypothetical protein TGME49_214100	171	6	5.60644e-102	99.13						no IPS match	no IPS match	no IPS match	ENOG		1.2e-94	Sarcocystidae		0
TGME49_214115	[INTERPRO, BLASTED]	hypothetical protein TGME49_214115	81	9	8.07439e-50	99.03						no IPS match	no IPS match	no IPS match
TGME49_214120	[INTERPRO, BLASTED, MAPPED, ANNOTATED]	hypothetical protein TGME49_214120	1263	15	0	87.6	5	P:GO:0035493; F:GO:0000149; C:GO:0000323; C:GO:0005768; C:GO:0032991	P:SNARE complex assembly; F:SNARE binding; C:lytic vacuole; C:endosome; C:protein-containing complex			no IPS match	no IPS match	no IPS match	ENOG		0	Sarcocystidae		0
TGME49_214130	[INTERPRO, BLASTED]	hypothetical protein TGME49_214130	1638	11	0	94.52						no IPS match	no IPS match	no IPS match	ENOG		0	Sarcocystidae		0
TGME49_214140	[INTERPRO, BLASTED]	hypothetical protein TGME49_214140	1975	20	0	93.74						no IPS match	no IPS match	no IPS match	ENOG		0	Sarcocystidae		0
TGME49_214160	[INTERPRO, BLASTED, MAPPED, ANNOTATED]	putative transmembrane protein	266	20	1.05082e-143	75.81	1	C:GO:0016020	C:membrane			no IPS match	no IPS match	no IPS match
TGME49_214170	[INTERPRO, BLASTED, MAPPED, ANNOTATED]	putative transmembrane protein	1065	20	0	94.68	6	P:GO:0097354; F:GO:0004663; C:GO:0005968	P:prenylation; F:Rab geranylgeranyltransferase activity; C:Rab-protein geranylgeranyltransferase complex	EC:2.5.1; EC:2; EC:2.5.1.60	Transferring alkyl or aryl groups, other than methyl groups; Transferases; protein geranylgeranyltransferase type II	G3DSA:1.25.40.120 (GENE3D); G3DSA:1.25.40.120 (GENE3D); IPR032675 (G3DSA:3.80.10.GENE3D); IPR002088 (PFAM); SSF48439 (SUPERFAMILY); SSF52075 (SUPERFAMILY)	P:GO:0018342; F:GO:0008318	P:protein prenylation; F:protein prenyltransferase activity	ENOG		0	Sarcocystidae		0
TGME49_214220	[INTERPRO, BLASTED]	hypothetical protein TGVEG_214220	112	14	2.77073e-66	79.67						no IPS match	no IPS match	no IPS match	ENOG		1.4e-56	Sarcocystidae		0
TGME49_214295	[INTERPRO, BLASTED, MAPPED, ANNOTATED]	putative transmembrane protein	115	7	3.42349e-78	98.14	1	C:GO:0016020	C:membrane			no IPS match	no IPS match	no IPS match
TGME49_214300	[INTERPRO, BLASTED, MAPPED, ANNOTATED]	concanavalin A-like lectin/glucanase family protein	2379	20	0	95.49	2	F:GO:0030246; C:GO:0016020	F:carbohydrate binding; C:membrane			IPR011641 (PFAM); G3DSA:2.10.50.10 (GENE3D); PTHR11319 (PANTHER); IPR009030 (SUPERFAMILY)	no GO terms	no GO terms	ENOG		0	Sarcocystidae		0
TGME49_214310	[INTERPRO, BLASTED]	hypothetical protein TGME49_214310	687	11	0	89.83						no IPS match	no IPS match	no IPS match	ENOG		0	Sarcocystidae		0
TGME49_214340	[INTERPRO, BLASTED]	hypothetical protein TGME49_214340	326	20	9.73221e-179	83.57						no IPS match	no IPS match	no IPS match	ENOG		2e-116	Sarcocystidae		0
TGME49_214370	[INTERPRO, BLASTED, MAPPED]	hypothetical protein TGME49_214370	845	20	0	81.2	5	P:GO:0006139; P:GO:0034587; F:GO:0003676; F:GO:0008408; C:GO:1990923	P:nucleobase-containing compound metabolic process; P:piRNA processing; F:nucleic acid binding; F:3'-5' exonuclease activity; C:PET complex			no IPS match	no IPS match	no IPS match	ENOG		0	Sarcocystidae		0
TGME49_214385	[INTERPRO, BLASTED, MAPPED, ANNOTATED]	hypothetical protein TGRH88_040120	70	4	1.75642e-25	89.26	1	C:GO:0016020	C:membrane			no IPS match	no IPS match	no IPS match	ENOG		1.7e-20	Sarcocystidae		0
TGME49_214400	[INTERPRO, BLASTED, MAPPED, ANNOTATED]	hypothetical protein TGME49_214400	222	5	5.48446e-154	96.99	1	C:GO:0016020	C:membrane			no IPS match	no IPS match	no IPS match
TGME49_214410	[INTERPRO, BLASTED, MAPPED, ANNOTATED]	putative transmembrane protein	592	19	0	73.93	1	C:GO:0016020	C:membrane			no IPS match	no IPS match	no IPS match	ENOG		0	Sarcocystidae		0
TGME49_214420	[INTERPRO, BLASTED, MAPPED, ANNOTATED]	putative transmembrane protein	335	20	1.14902e-110	86.14	1	C:GO:0016020	C:membrane			no IPS match	no IPS match	no IPS match	ENOG		4.1e-104	Sarcocystidae		0
TGME49_214430	[INTERPRO, BLASTED, MAPPED, ANNOTATED]	putative transmembrane protein	515	20	0	89.64	1	C:GO:0016020	C:membrane			no IPS match	no IPS match	no IPS match	ENOG		5.6e-270	Sarcocystidae		0
TGME49_214510	[INTERPRO, BLASTED, MAPPED]	hypothetical protein TGME49_214510	900	20	0	76.91	1	C:GO:0016020	C:membrane			no IPS match	no IPS match	no IPS match	ENOG		0	Sarcocystidae		0
TGME49_214540	[INTERPRO, BLASTED]	hypothetical protein TGMAS_214540	367	9	0	84.89						no IPS match	no IPS match	no IPS match	ENOG		2.6e-208	Sarcocystidae		0
TGME49_214560	[INTERPRO, BLASTED]	hypothetical protein TGME49_214560	1551	20	0	89.05						no IPS match	no IPS match	no IPS match	ENOG		0	Sarcocystidae		0
TGME49_214570	[INTERPRO, BLASTED]	hypothetical protein TGME49_214570	629	8	0	92.47						no IPS match	no IPS match	no IPS match	ENOG		0	Sarcocystidae		0
TGME49_214575	[INTERPRO, BLASTED]	hypothetical protein TGME49_214575	92	3	3.07302e-60	81.99						no IPS match	no IPS match	no IPS match
TGME49_214600	[INTERPRO, BLASTED]	hypothetical protein TGME49_214600	4063	19	0	89.47						no IPS match	no IPS match	no IPS match	ENOG		0	Sarcocystidae		0
TGME49_214630	[INTERPRO, BLASTED, MAPPED, ANNOTATED]	putative transmembrane protein	1552	15	0	92.16	1	C:GO:0016020	C:membrane			no IPS match	no IPS match	no IPS match	ENOG		0	Sarcocystidae		0
TGME49_214740	[INTERPRO, BLASTED]	TPA: retinitis pigmentosa 1-like 1 protein, putative	1568	20	0	86.88						no IPS match	no IPS match	no IPS match	ENOG		0	Sarcocystidae		0
TGME49_214750	[INTERPRO, BLASTED]	hypothetical protein TGME49_214750	1108	20	0	95.19						no IPS match	no IPS match	no IPS match	ENOG		0	Sarcocystidae		0
TGME49_214783	[INTERPRO, BLASTED]	hypothetical protein TGME49_214783	60	4	4.16871e-36	96.75						no IPS match	no IPS match	no IPS match
TGME49_214787	[INTERPRO, BLASTED]	hypothetical protein TGME49_214787	68	3	3.71736e-41	99.02						no IPS match	no IPS match	no IPS match
TGME49_214800	[INTERPRO, BLASTED]	erythrocyte membrane protein, putative	759	20	0	76.58						no IPS match	no IPS match	no IPS match	ENOG		0	Sarcocystidae		0
TGME49_214835	[INTERPRO, BLASTED]	hypothetical protein TGME49_214835	126	6	2.29009e-87	97.75						no IPS match	no IPS match	no IPS match
TGME49_214860	[INTERPRO, BLASTED]	hypothetical protein TGME49_214860	114	1	2.4422e-78	100						no IPS match	no IPS match	no IPS match
TGME49_214900	[INTERPRO, BLASTED, MAPPED, ANNOTATED]	putative transmembrane protein	2285	20	0	80.84	1	C:GO:0016020	C:membrane			no IPS match	no IPS match	no IPS match	ENOG		0	Sarcocystidae		0
TGME49_214910	[INTERPRO, BLASTED, MAPPED]	hypothetical protein TGME49_214910	750	18	0	88.78	1	C:GO:0016020	C:membrane			PS51257 (PROSITE_PROFILES)	no GO terms	no GO terms	ENOG		9.7e-263	Sarcocystidae		0
TGME49_214950	[INTERPRO, NO-BLAST]	---NA---	195									no IPS match	no IPS match	no IPS match
TGME49_214980	[INTERPRO, BLASTED]	hypothetical protein TGME49_214980	1109	14	0	93.49						no IPS match	no IPS match	no IPS match	ENOG		0	Sarcocystidae		0
TGME49_214990	[INTERPRO, BLASTED]	hypothetical protein TGME49_214990	3436	20	0	96.54						IPR043519 (G3DSA:3.30.460.GENE3D); G3DSA:1.10.1410.10 (GENE3D); PTHR45979 (PANTHER); SSF81631 (SUPERFAMILY); IPR043519 (SUPERFAMILY)	no GO terms	no GO terms	COG,KOG,ENOG	polynucleotide adenylyltransferase activity	0	Sarcocystidae		0
TGME49_215010	[INTERPRO, BLASTED, MAPPED, ANNOTATED]	protease prsW family protein	921	20	0	99.07	6	P:GO:0006508; F:GO:0008233; C:GO:0016020	P:proteolysis; F:peptidase activity; C:membrane	EC:3.4; EC:3	Acting on peptide bonds (peptidases); Hydrolases	IPR026898 (PFAM); IPR051352 (PANTHER)	F:GO:0008233	F:peptidase activity	ENOG	Protease prsW family	8.7e-298	Sarcocystidae		0
TGME49_215020	[INTERPRO, BLASTED]	hypothetical protein TGGT1_215020	530	20	0	85.56						no IPS match	no IPS match	no IPS match	ENOG		3.6e-272	Sarcocystidae		0
TGME49_215055	[INTERPRO, BLASTED]	hypothetical protein TGME49_215055	240	2	7.38622e-108	99.71						no IPS match	no IPS match	no IPS match
TGME49_215080	[INTERPRO, BLASTED, MAPPED, ANNOTATED]	putative transmembrane protein	3341	20	0	97.14	2	C:GO:0005634; C:GO:0016020	C:nucleus; C:membrane			PTHR15657 (PANTHER)	C:GO:0005634	C:nucleus	ENOG	negative regulation of Rho guanyl-nucleotide exchange factor activity	0	Sarcocystidae		0
TGME49_215140	[INTERPRO, BLASTED, MAPPED]	putative transmembrane protein	354	20	0	72.72	1	C:GO:0016020	C:membrane			no IPS match	no IPS match	no IPS match	ENOG		4.7e-183	Sarcocystidae		0
TGME49_215160	[INTERPRO, BLASTED, MAPPED, ANNOTATED]	hypothetical protein TGME49_215160	269	7	0	94.73	1	C:GO:0016020	C:membrane			IPR036865 (G3DSA:3.40.525.GENE3D)	no GO terms	no GO terms	ENOG		9.2e-147	Sarcocystidae		0
TGME49_215165	[INTERPRO, BLASTED]	hypothetical protein TGME49_215165	179	7	1.4135e-129	98.85						IPR036028 (SUPERFAMILY)	F:GO:0005515	F:protein binding
TGME49_215270	[INTERPRO, BLASTED]	hypothetical protein TGARI_215270	164	6	7.0193e-98	99.31						no IPS match	no IPS match	no IPS match
TGME49_215300	[INTERPRO, BLASTED]	hypothetical protein TGME49_215300	599	11	0	87.35						no IPS match	no IPS match	no IPS match	ENOG		2.7e-199	Sarcocystidae		0
TGME49_215347	[INTERPRO, BLASTED]	hypothetical protein TGME49_215347	122	3	4.53581e-85	99.45						no IPS match	no IPS match	no IPS match
TGME49_215350	[INTERPRO, BLASTED]	Chain i1, Inhibitor of F1	145	20	1.66968e-104	76.94						no IPS match	no IPS match	no IPS match	ENOG		2e-76	Sarcocystidae		0
TGME49_215370	[INTERPRO, BLASTED, MAPPED, ANNOTATED]	elongation factor	1142	20	0	81.1	3	P:GO:0010467; P:GO:0019538; F:GO:0005488	P:gene expression; P:protein metabolic process; F:binding			no IPS match	no IPS match	no IPS match	ENOG		0	Sarcocystidae		0
TGME49_215380	[INTERPRO, BLASTED]	hypothetical protein TGME49_215380	797	13	0	91.69						no IPS match	no IPS match	no IPS match	ENOG		0	Sarcocystidae		0
TGME49_215520	[INTERPRO, BLASTED]	PK1-interactor 1	462	12	0	89.68						no IPS match	no IPS match	no IPS match	ENOG		2.8e-212	Sarcocystidae		0
TGME49_215530	[INTERPRO, BLASTED]	hypothetical protein TGME49_215530	143	8	5.74145e-89	91.63						no IPS match	no IPS match	no IPS match	ENOG		5e-43	Sarcocystidae		0
TGME49_215540	[INTERPRO, BLASTED]	hypothetical protein TGME49_215540	204	8	6.20285e-51	95.48						no IPS match	no IPS match	no IPS match	ENOG		2e-37	Sarcocystidae		0
TGME49_215600	[INTERPRO, BLASTED]	hypothetical protein TGME49_215600	332	16	9.11829e-127	96.75						no IPS match	no IPS match	no IPS match	ENOG		1.4e-141	Sarcocystidae		0
TGME49_215620	[INTERPRO, BLASTED, MAPPED]	TPA: DNA-directed RNA polymerase II subunit RPB1	1930	19	0	92.63	1	C:GO:0000428	C:DNA-directed RNA polymerase complex			no IPS match	no IPS match	no IPS match	ENOG		0	Sarcocystidae		0
TGME49_215650	[INTERPRO, BLASTED]	hypothetical protein TGME49_215650	176	10	5.68547e-99	98.98						no IPS match	no IPS match	no IPS match
TGME49_215660	[INTERPRO, BLASTED, MAPPED, ANNOTATED]	putative transmembrane protein	645	15	0	88.42	1	C:GO:0016020	C:membrane			no IPS match	no IPS match	no IPS match	ENOG		2.1e-266	Sarcocystidae		0
TGME49_215690	[INTERPRO, BLASTED, MAPPED, ANNOTATED]	putative transmembrane protein	1543	20	0	93.63	1	C:GO:0016020	C:membrane			no IPS match	no IPS match	no IPS match	ENOG		0	Sarcocystidae		0
TGME49_215710	[INTERPRO, BLASTED, MAPPED, ANNOTATED]	putative transmembrane protein	810	20	0	95.1	1	C:GO:0016020	C:membrane			no IPS match	no IPS match	no IPS match	ENOG		0	Sarcocystidae		0
TGME49_215885	[INTERPRO, BLASTED]	mucin-like protein	273	20	1.24411e-57	99.84						no IPS match	no IPS match	no IPS match	ENOG		3.1e-65	Sarcocystidae		0
TGME49_215890	[INTERPRO, BLASTED, MAPPED, ANNOTATED]	putative trichohyalin	1427	18	0	78.32	6	P:GO:0034454; P:GO:0048167; P:GO:0048790; F:GO:0098882; C:GO:0005737; C:GO:0005813	P:microtubule anchoring at centrosome; P:regulation of synaptic plasticity; P:maintenance of presynaptic active zone structure; F:structural constituent of presynaptic active zone; C:cytoplasm; C:centrosome			no IPS match	no IPS match	no IPS match	ENOG		0	Sarcocystidae		0
TGME49_215900	[INTERPRO, BLASTED]	hypothetical protein TGME49_215900	999	9	0	96.25						no IPS match	no IPS match	no IPS match	ENOG		0	Sarcocystidae		0
TGME49_215910	[INTERPRO, BLASTED]	hypothetical protein TGME49_215910	3029	20	0	81.42						IPR041246 (PFAM); G3DSA:2.60.40.3710 (GENE3D)	no GO terms	no GO terms	ENOG		0	Sarcocystidae		0
TGME49_215920	[INTERPRO, BLASTED]	ubiquinol-cytochrome C family chaperone	392	20	0	80.18						IPR021150 (PFAM)	no GO terms	no GO terms	ENOG	Ubiquinol-cytochrome C chaperone	8.1e-136	Sarcocystidae		0
TGME49_215950	[INTERPRO, BLASTED, MAPPED, ANNOTATED]	Tc5 transposase DNA-binding domain protein	1717	20	0	96.92	3	P:GO:0006355; F:GO:0003677; C:GO:0005634	P:regulation of DNA-templated transcription; F:DNA binding; C:nucleus			G3DSA:1.10.10.60 (GENE3D); IPR018586 (PFAM); IPR006600 (PFAM); IPR006600 (PROSITE_PROFILES); IPR009057 (SUPERFAMILY)	no GO terms	no GO terms	KOG,ENOG	Putative DNA-binding domain in centromere protein B, mouse jerky and transposases.	0	Sarcocystidae		0
TGME49_215955	[INTERPRO, BLASTED]	hypothetical protein TGME49_215955	100	3	4.35983e-52	96.73						no IPS match	no IPS match	no IPS match
TGME49_215960	[INTERPRO, BLASTED]	hypothetical protein TGME49_215960	160	6	7.06397e-97	99.79						no IPS match	no IPS match	no IPS match
TGME49_215970	[INTERPRO, BLASTED]	hypothetical protein TGME49_215970	162	5	1.58876e-110	99.88						no IPS match	no IPS match	no IPS match
TGME49_215980	[INTERPRO, BLASTED, MAPPED, ANNOTATED]	putative transmembrane protein	210	8	2.96472e-139	94.82	1	C:GO:0016020	C:membrane			no IPS match	no IPS match	no IPS match	ENOG		1.8e-102	Sarcocystidae		0
TGME49_216053	[INTERPRO, BLASTED]	hypothetical protein TGME49_216053	287	8	0	94.49						no IPS match	no IPS match	no IPS match
TGME49_216055	[INTERPRO, BLASTED]	hypothetical protein TGME49_216055	288	11	0	91.92						no IPS match	no IPS match	no IPS match	ENOG		5.6e-134	Sarcocystidae		0
TGME49_216060	[INTERPRO, BLASTED, MAPPED, ANNOTATED]	putative transmembrane protein	784	11	0	90.69	1	C:GO:0016020	C:membrane			no IPS match	no IPS match	no IPS match	ENOG		0	Sarcocystidae		0
TGME49_216090	[INTERPRO, BLASTED, MAPPED]	tropomyosin 1 alpha chain, putative	350	16	0	83.14	2	F:GO:0000976; C:GO:0005634	F:transcription cis-regulatory region binding; C:nucleus			no IPS match	no IPS match	no IPS match	ENOG		2.7e-130	Sarcocystidae		0
TGME49_216120	[INTERPRO, BLASTED]	hypothetical protein TGME49_216120	834	13	0	81.34						no IPS match	no IPS match	no IPS match	ENOG		0	Sarcocystidae		0
TGME49_216155	[INTERPRO, BLASTED, MAPPED, ANNOTATED]	peptidase family M3 protein	141	20	2.14635e-98	64.39	1	F:GO:0008237	F:metallopeptidase activity	EC:3.4	Acting on peptide bonds (peptidases)	G3DSA:1.20.140.70 (GENE3D)	no GO terms	no GO terms
TGME49_216160	[INTERPRO, BLASTED]	hypothetical protein TGME49_216160	424	7	0	95.19						no IPS match	no IPS match	no IPS match	ENOG		1.2e-246	Sarcocystidae		0
TGME49_216180	[INTERPRO, BLASTED, MAPPED, ANNOTATED]	putative transmembrane protein	147	4	6.37793e-84	92	1	C:GO:0016020	C:membrane			no IPS match	no IPS match	no IPS match	ENOG		5.9e-71	Sarcocystidae		0
TGME49_216190	[INTERPRO, BLASTED, MAPPED]	hypothetical protein TGME49_216190	1986	20	0	83.44	1	C:GO:0016020	C:membrane			no IPS match	no IPS match	no IPS match	ENOG		0	Sarcocystidae		0
TGME49_216200	[INTERPRO, BLASTED]	hypothetical protein TGME49_216200	238	6	3.65986e-148	99.72						no IPS match	no IPS match	no IPS match
TGME49_216210	[INTERPRO, BLASTED]	down-regulated in metastasis protein	5565	20	0	94.41						IPR011430 (PFAM); IPR046523 (PFAM); IPR052575 (PANTHER); IPR016024 (SUPERFAMILY)	C:GO:0005730; C:GO:0030686; C:GO:0032040	C:nucleolus; C:90S preribosome; C:small-subunit processome	KOG,ENOG	Down-regulated in metastasis	0	Sarcocystidae		0
TGME49_216240	[INTERPRO, BLASTED, MAPPED, ANNOTATED]	tubulin-binding cofactor C	804	20	0	93.81	3	P:GO:0051661; P:GO:0051684; C:GO:0031616	P:maintenance of centrosome location; P:maintenance of Golgi location; C:spindle pole centrosome			IPR012945 (PFAM); IPR016098 (G3DSA:2.160.20.GENE3D); IPR039589 (PANTHER); IPR017901 (PROSITE_PROFILES)	no GO terms	no GO terms	ENOG	Tubulin binding cofactor C	0	Sarcocystidae		0
TGME49_216270	[INTERPRO, BLASTED, MAPPED, ANNOTATED]	methyltransferase domain protein	279	20	1.71134e-159	89.9	4	P:GO:0032259; P:GO:1905706; F:GO:0016279; C:GO:0005739	P:methylation; P:regulation of mitochondrial ATP synthesis coupled proton transport; F:protein-lysine N-methyltransferase activity; C:mitochondrion	EC:2.1.1	Transferring one-carbon groups	IPR029063 (G3DSA:3.40.50.GENE3D); IPR026170 (PANTHER); cd02440 (CDD); IPR029063 (SUPERFAMILY)	P:GO:0018023; P:GO:1905273; P:GO:1905706; F:GO:0016279; C:GO:0005739	P:peptidyl-lysine trimethylation; P:positive regulation of proton-transporting ATP synthase activity, rotational mechanism; P:regulation of mitochondrial ATP synthesis coupled proton transport; F:protein-lysine N-methyltransferase activity; C:mitochondrion	ENOG		1.6e-90	Sarcocystidae		0
TGME49_216290	[INTERPRO, BLASTED, MAPPED, ANNOTATED]	amine-terminal region of chorein, A TM vesicle-mediated sorter	2204	20	0	90.16	5	P:GO:0006623; P:GO:0007005; P:GO:0045053; P:GO:0045324; C:GO:0019898	P:protein targeting to vacuole; P:mitochondrion organization; P:protein retention in Golgi apparatus; P:late endosome to vacuole transport; C:extrinsic component of membrane			IPR026854 (PFAM); IPR026847 (PANTHER)	P:GO:0006623; P:GO:0045053; C:GO:0019898	P:protein targeting to vacuole; P:protein retention in Golgi apparatus; C:extrinsic component of membrane	COG,KOG,ENOG	regulation of parkin-mediated stimulation of mitophagy in response to mitochondrial depolarization	0	Sarcocystidae		0
TGME49_216335	[INTERPRO, BLASTED]	putative transmembrane protein	7450	20	0	99						IPR031645 (PFAM); IPR026847 (PANTHER)	P:GO:0006623; P:GO:0045053; C:GO:0019898	P:protein targeting to vacuole; P:protein retention in Golgi apparatus; C:extrinsic component of membrane	COG,KOG,ENOG	regulation of parkin-mediated stimulation of mitophagy in response to mitochondrial depolarization	0	Sarcocystidae		0
TGME49_216375	[INTERPRO, BLASTED, MAPPED, ANNOTATED]	putative transmembrane protein	305	17	2.53309e-131	72.06	1	C:GO:0016020	C:membrane			no IPS match	no IPS match	no IPS match	COG,KOG,ENOG	ABC transporter transmembrane region	4.7e-06	Tremellales		0
TGME49_216410	[INTERPRO, BLASTED]	putative apicomplexan specific protein	188	20	8.36137e-133	67.38						no IPS match	no IPS match	no IPS match	ENOG		2.1e-89	Sarcocystidae		0
TGME49_216415	[INTERPRO, BLASTED]	hypothetical protein TGME49_216415	164	4	5.62893e-118	99.39						no IPS match	no IPS match	no IPS match	COG,ENOG	Nickel-dependent hydrogenase	0.049	Citrobacter	EC:1.12.99.6	9	P:GO:0022900; C:GO:0030288; P:GO:0006113; C:GO:0044569; C:GO:0005886; P:GO:0009061; F:GO:0016491; F:GO:0009055; F:GO:0016151	F:nickel cation binding; P:fermentation; F:electron transfer activity; C:[Ni-Fe] hydrogenase complex; P:anaerobic respiration; F:oxidoreductase activity; C:outer membrane-bounded periplasmic space; P:electron transport chain; C:plasma membrane	K06281	map00633,map01120
TGME49_216420	[INTERPRO, BLASTED]	hypothetical protein TGME49_216420	153	6	5.00464e-92	99.13						no IPS match	no IPS match	no IPS match	ENOG		1.2e-63	Sarcocystidae		0
TGME49_216435	[INTERPRO, BLASTED, MAPPED, ANNOTATED]	nucleolar 12, 25 kDa protein	350	12	0	95.4	2	F:GO:0019843; C:GO:0005730	F:rRNA binding; C:nucleolus			IPR019186 (PFAM); IPR019186 (PANTHER)	F:GO:0019843; C:GO:0005730	F:rRNA binding; C:nucleolus	ENOG	Nucleolar protein 12 (25kDa)	1.2e-106	Sarcocystidae		0
TGME49_216460	[INTERPRO, BLASTED, MAPPED, ANNOTATED]	putative transmembrane protein	537	20	0	72.21	1	C:GO:0016020	C:membrane			no IPS match	no IPS match	no IPS match	ENOG		6.3e-280	Sarcocystidae		0
TGME49_216470	[INTERPRO, BLASTED]	TPA: hypothetical protein BN1205_037820	608	10	0	93.21						no IPS match	no IPS match	no IPS match	ENOG		1.5e-269	Sarcocystidae		0
TGME49_216490	[INTERPRO, BLASTED, MAPPED, ANNOTATED]	hypothetical protein TGME49_216490	234	6	7.25388e-159	87.28	1	F:GO:0008270	F:zinc ion binding			IPR007527 (PROSITE_PROFILES)	F:GO:0008270	F:zinc ion binding	ENOG		5e-117	Sarcocystidae		0
TGME49_216580	[INTERPRO, BLASTED]	hypothetical protein TGME49_216580	1327	14	0	94.1						no IPS match	no IPS match	no IPS match	ENOG		0	Sarcocystidae		0
TGME49_216585	[INTERPRO, BLASTED]	hypothetical protein TGME49_216585	91	5	2.07809e-60	97.61						no IPS match	no IPS match	no IPS match
TGME49_216660	[INTERPRO, BLASTED, MAPPED, ANNOTATED]	sequence orphan	461	20	0	64.95	1	C:GO:0005739	C:mitochondrion			IPR038781 (PANTHER)	C:GO:0005739	C:mitochondrion	ENOG		6.9e-219	Sarcocystidae		0
TGME49_216720	[INTERPRO, BLASTED]	hypothetical protein TGME49_216720	183	4	1.27366e-106	88.92						no IPS match	no IPS match	no IPS match	ENOG		1.4e-93	Sarcocystidae		0
TGME49_216770	[INTERPRO, BLASTED, MAPPED, ANNOTATED]	putative transmembrane protein	163	5	2.07881e-66	99.02	1	C:GO:0016020	C:membrane			no IPS match	no IPS match	no IPS match
TGME49_216780	[INTERPRO, BLASTED]	TPA: hypothetical protein BN1205_037510	1243	20	0	93.03						no IPS match	no IPS match	no IPS match	ENOG		0	Sarcocystidae		0
TGME49_216785	[INTERPRO, BLASTED, MAPPED, ANNOTATED]	putative transmembrane protein	121	6	8.76248e-82	98.48	1	C:GO:0016020	C:membrane			no IPS match	no IPS match	no IPS match
TGME49_216840	[INTERPRO, BLASTED, MAPPED]	hypothetical protein TGME49_216840	1028	16	0	80.63	5	P:GO:0006338; P:GO:1900461; F:GO:0003712; F:GO:0050825; C:GO:0005634	P:chromatin remodeling; P:positive regulation of pseudohyphal growth by positive regulation of transcription from RNA polymerase II promoter; F:transcription coregulator activity; F:ice binding; C:nucleus			no IPS match	no IPS match	no IPS match	ENOG	Zinc-binding domain	0	Sarcocystidae		0
TGME49_216850	[INTERPRO, BLASTED]	hypothetical protein TGME49_216850	361	8	0	90.15						no IPS match	no IPS match	no IPS match	ENOG		9.3e-179	Sarcocystidae		0
TGME49_216890	[INTERPRO, BLASTED, MAPPED, ANNOTATED]	lung seven transmembrane receptor	999	20	0	92.15	6	P:GO:0007186; P:GO:0019236; P:GO:0042147; C:GO:0005794; C:GO:0005829; C:GO:0016020	P:G protein-coupled receptor signaling pathway; P:response to pheromone; P:retrograde transport, endosome to Golgi; C:Golgi apparatus; C:cytosol; C:membrane			IPR009637 (PANTHER)	P:GO:0006810; C:GO:0005794; C:GO:0016020	P:transport; C:Golgi apparatus; C:membrane	ENOG	Lung seven transmembrane receptor	0	Sarcocystidae		0
TGME49_216910	[INTERPRO, BLASTED, MAPPED, ANNOTATED]	hypothetical protein TGGT1_216910	217	20	6.25409e-132	84.82	1	C:GO:0016020	C:membrane			G3DSA:3.40.30.10 (GENE3D)	no GO terms	no GO terms	ENOG		8.7e-63	Sarcocystidae		0
TGME49_216940	[INTERPRO, BLASTED, MAPPED]	putative transmembrane protein	350	20	0	64.35	6	P:GO:0006657; P:GO:0008654; F:GO:0004105; F:GO:0016779; F:GO:0031210; C:GO:0005635	P:CDP-choline pathway; P:phospholipid biosynthetic process; F:choline-phosphate cytidylyltransferase activity; F:nucleotidyltransferase activity; F:phosphatidylcholine binding; C:nuclear envelope			G3DSA:2.60.120.560 (GENE3D)	no GO terms	no GO terms	ENOG		3.4e-178	Sarcocystidae		0
TGME49_217000	[INTERPRO, BLASTED, MAPPED, ANNOTATED]	hypothetical protein TGME49_217000	696	16	0	81.64	5	P:GO:0030838; P:GO:0070060; F:GO:0005522; F:GO:0051015; C:GO:0015629	P:positive regulation of actin filament polymerization; P:'de novo' actin filament nucleation; F:profilin binding; F:actin filament binding; C:actin cytoskeleton			IPR051425 (PANTHER)	no GO terms	no GO terms	ENOG		1.2e-251	Sarcocystidae		0
TGME49_217030	[INTERPRO, BLASTED, MAPPED]	hypothetical protein TGME49_217030	218	20	9.20572e-159	79.89	2	P:GO:0034553; C:GO:0005739	P:mitochondrial respiratory chain complex II assembly; C:mitochondrion			IPR012875 (PFAM)	no GO terms	no GO terms	ENOG	Protein of unknown function (DUF1674)	3.8e-119	Sarcocystidae		0
TGME49_217040	[INTERPRO, BLASTED, MAPPED]	hypothetical protein TGME49_217040	226	20	2.44906e-165	62.11	1	C:GO:0016020	C:membrane			no IPS match	no IPS match	no IPS match	ENOG		7.6e-86	Sarcocystidae		0
TGME49_217340	[INTERPRO, BLASTED, MAPPED, ANNOTATED]	putative transmembrane protein	785	18	0	88.26	1	C:GO:0016020	C:membrane			no IPS match	no IPS match	no IPS match	ENOG		0	Sarcocystidae		0
TGME49_217360	[INTERPRO, BLASTED]	putative liver stage antigen, related protein	2084	15	0	93.26						no IPS match	no IPS match	no IPS match	ENOG		0	Sarcocystidae		0
TGME49_217370	[INTERPRO, BLASTED, MAPPED, ANNOTATED]	putative transmembrane protein	164	5	3.37753e-104	83.25	1	C:GO:0016020	C:membrane			no IPS match	no IPS match	no IPS match	ENOG		4.4e-83	Sarcocystidae		0
TGME49_217380	[INTERPRO, BLASTED]	hypothetical protein TGME49_217380	1119	10	0	87.23						no IPS match	no IPS match	no IPS match	ENOG		0	Sarcocystidae		0
TGME49_217390	[INTERPRO, BLASTED]	REJ domain protein	1416	13	0	89.74						IPR002859 (PFAM)	no GO terms	no GO terms	ENOG	REJ domain	0	Sarcocystidae		0
TGME49_217400	[INTERPRO, BLASTED, MAPPED, ANNOTATED]	putative transmembrane protein	771	9	0	88.78	1	C:GO:0016020	C:membrane			no IPS match	no IPS match	no IPS match	ENOG		0	Sarcocystidae		0
TGME49_217410	[INTERPRO, BLASTED, MAPPED, ANNOTATED]	putative transmembrane protein	875	12	0	87.61	1	C:GO:0016020	C:membrane			no IPS match	no IPS match	no IPS match	ENOG		0	Sarcocystidae		0
TGME49_217420	[INTERPRO, BLASTED, MAPPED, ANNOTATED]	putative transmembrane protein	752	10	0	76.57	1	C:GO:0016020	C:membrane			no IPS match	no IPS match	no IPS match	ENOG		0	Sarcocystidae		0
TGME49_217470	[INTERPRO, BLASTED]	TPA: hypothetical protein BN1205_007060	1597	13	0	88.1						no IPS match	no IPS match	no IPS match	ENOG		0	Sarcocystidae		0
TGME49_217480	[INTERPRO, BLASTED, MAPPED]	AF4/FMR2 family member 4	1589	20	0	81.12	4	P:GO:0035082; P:GO:0042461; P:GO:0060041; C:GO:0005930	P:axoneme assembly; P:photoreceptor cell development; P:retina development in camera-type eye; C:axoneme			no IPS match	no IPS match	no IPS match	ENOG		0	Sarcocystidae		0
TGME49_217490	[INTERPRO, BLASTED]	hypothetical protein TGME49_217490	218	7	1.0535e-118	87.23						no IPS match	no IPS match	no IPS match	ENOG		4.7e-117	Sarcocystidae		0
TGME49_217520	[INTERPRO, BLASTED]	hypothetical protein TGME49_217520	134	5	5.34783e-83	94.78						no IPS match	no IPS match	no IPS match	ENOG		2.7e-67	Sarcocystidae		0
TGME49_217555	[INTERPRO, BLASTED]	hypothetical protein TGME49_217555	108	7	1.12375e-59	85.23						no IPS match	no IPS match	no IPS match	ENOG		1.9e-47	Sarcocystidae		0
TGME49_217610	[INTERPRO, BLASTED, MAPPED, ANNOTATED]	putative transmembrane protein	1179	20	0	77	1	C:GO:0016020	C:membrane			no IPS match	no IPS match	no IPS match	ENOG		0	Sarcocystidae		0
TGME49_217630	[INTERPRO, BLASTED, MAPPED]	tetratricopeptide repeat protein	1001	20	0	75.19	1	C:GO:0101031	C:protein folding chaperone complex			IPR011990 (G3DSA:1.25.40.GENE3D); IPR011990 (SUPERFAMILY)	F:GO:0005515	F:protein binding	ENOG		0	Sarcocystidae		0
TGME49_217640	[INTERPRO, BLASTED]	hypothetical protein TGME49_217640	130	4	7.32113e-79	86.85						no IPS match	no IPS match	no IPS match	ENOG		3.1e-68	Sarcocystidae		0
TGME49_217665	[INTERPRO, BLASTED, MAPPED, ANNOTATED]	alba protein	195	5	7.0244e-120	90.2	5	P:GO:0048870; F:GO:0005515; C:GO:0005737; C:GO:0005856; C:GO:0043227	P:cell motility; F:protein binding; C:cytoplasm; C:cytoskeleton; C:membrane-bounded organelle			no IPS match	no IPS match	no IPS match	KOG,ENOG	Ribonuclease P protein subunit p25-like	0.22	Viridiplantae	EC:3.1.26.5	0			K14525	map03008,map03013
TGME49_217688	[INTERPRO, BLASTED]	hypothetical protein TGVEG_217688	785	12	0	89.23						no IPS match	no IPS match	no IPS match	ENOG		0	Sarcocystidae		0
TGME49_217692	[INTERPRO, BLASTED, MAPPED, ANNOTATED]	exostosin family protein	1569	20	0	79.95	12	P:GO:0006486; P:GO:0009834; P:GO:0010417; F:GO:0047517; F:GO:0080116; C:GO:0016020	P:protein glycosylation; P:plant-type secondary cell wall biogenesis; P:glucuronoxylan biosynthetic process; F:1,4-beta-D-xylan synthase activity; F:glucuronoxylan glucuronosyltransferase activity; C:membrane	EC:2.4.2; EC:2.4.2.24; EC:2.4; EC:2; EC:2.4.1.17; EC:2.4.1	Glycosyltransferases; 1,4-beta-D-xylan synthase; Glycosyltransferases; Transferases; glucuronosyltransferase; Glycosyltransferases	IPR040911 (PFAM)	no GO terms	no GO terms	KOG,ENOG	Exostosin family	0	Sarcocystidae		0
TGME49_217720	[INTERPRO, BLASTED, MAPPED, ANNOTATED]	putative transmembrane protein	259	7	1.89321e-130	99.45	1	C:GO:0016020	C:membrane			no IPS match	no IPS match	no IPS match	ENOG		2.9e-129	Sarcocystidae		0
TGME49_217722	[INTERPRO, BLASTED]	hypothetical protein TGME49_217722	86	7	7.56422e-55	97.84						no IPS match	no IPS match	no IPS match
TGME49_217724	[INTERPRO, BLASTED]	hypothetical protein TGME49_217724	118	8	4.54343e-80	98.73						no IPS match	no IPS match	no IPS match
TGME49_217726	[INTERPRO, BLASTED]	hypothetical protein TGME49_217726	73	6	1.44399e-44	97.92						no IPS match	no IPS match	no IPS match
TGME49_217728	[INTERPRO, BLASTED]	hypothetical protein TGME49_217728	108	7	9.23972e-72	99.23						no IPS match	no IPS match	no IPS match
TGME49_217770	[INTERPRO, BLASTED]	hypothetical protein TGARI_217770	1566	18	0	93.1						no IPS match	no IPS match	no IPS match	ENOG		0	Sarcocystidae		0
TGME49_217800	[INTERPRO, BLASTED, MAPPED, ANNOTATED]	Ser/Thr phosphatase family protein	2586	20	0	91.53	6	P:GO:0006798; F:GO:0000298; F:GO:0004309; F:GO:0008081; C:GO:0000324; C:GO:0005615	P:polyphosphate catabolic process; F:endopolyphosphatase activity; F:exopolyphosphatase activity; F:phosphoric diester hydrolase activity; C:fungal-type vacuole; C:extracellular space	EC:3.1.4; EC:3.6.1.11; EC:3.6.1.10	Acting on ester bonds; exopolyphosphatase; endopolyphosphatase	PIRSR000948-1 (PIRSR); PTHR10340 (PANTHER); IPR029052 (SUPERFAMILY)	F:GO:0008081; C:GO:0005615	F:phosphoric diester hydrolase activity; C:extracellular space	ENOG		0	Sarcocystidae		0
TGME49_217810	[INTERPRO, BLASTED]	hypothetical protein TGME49_217810	196	8	1.9071e-116	98.66						no IPS match	no IPS match	no IPS match
TGME49_217830	[INTERPRO, BLASTED]	hypothetical protein TGME49_217830	1917	20	0	97.39						G3DSA:2.60.120.620 (GENE3D); SSF51197 (SUPERFAMILY)	no GO terms	no GO terms	ENOG		0	Sarcocystidae		0
TGME49_217855	[INTERPRO, BLASTED]	hypothetical protein TGME49_217855	149	6	1.12562e-90	98.99						no IPS match	no IPS match	no IPS match
TGME49_217860	[INTERPRO, BLASTED]	hypothetical protein TGME49_217860	3095	15	0	89.18						no IPS match	no IPS match	no IPS match	ENOG		0	Sarcocystidae		0
TGME49_217875	[INTERPRO, BLASTED]	hypothetical protein TGGT1_217875	88	3	1.19559e-45	98.86						no IPS match	no IPS match	no IPS match
TGME49_217900	[INTERPRO, BLASTED]	hypothetical protein TGME49_217900	182	20	3.72715e-132	79.36						no IPS match	no IPS match	no IPS match	ENOG		2.2e-91	Sarcocystidae		0
TGME49_217940	[INTERPRO, BLASTED, MAPPED, ANNOTATED]	hypothetical protein TGME49_217940	366	20	0	83.74	4	P:GO:0008285; F:GO:0015631; C:GO:0005737; C:GO:0005929	P:negative regulation of cell population proliferation; F:tubulin binding; C:cytoplasm; C:cilium			IPR013783 (G3DSA:2.60.40.GENE3D)	no GO terms	no GO terms	ENOG		2.1e-77	Sarcocystidae		0
TGME49_217951	[INTERPRO, BLASTED, MAPPED]	hypothetical protein TGME49_217951	139	14	2.05542e-84	89.6	1	F:GO:0046872	F:metal ion binding			no IPS match	no IPS match	no IPS match	ENOG		2.4e-29	Sarcocystidae		0
TGME49_217961	[INTERPRO, BLASTED, MAPPED, ANNOTATED]	hypothetical protein TGME49_217961	830	20	0	93.32	4	P:GO:0008285; F:GO:0015631; C:GO:0005737; C:GO:0005929	P:negative regulation of cell population proliferation; F:tubulin binding; C:cytoplasm; C:cilium			no IPS match	no IPS match	no IPS match	ENOG		0	Sarcocystidae		0
TGME49_218000	[INTERPRO, BLASTED]	hypothetical protein TGME49_218000	3286	20	0	98.14						IPR051352 (PANTHER)	no GO terms	no GO terms	ENOG	response to salt stress	0	Sarcocystidae		0
TGME49_218070	[INTERPRO, BLASTED, MAPPED, ANNOTATED]	hypothetical protein TGME49_218070	1745	20	0	94.09	3	P:GO:0006270; F:GO:0003682; C:GO:0005730	P:DNA replication initiation; F:chromatin binding; C:nucleolus			IPR011501 (PFAM)	no GO terms	no GO terms	COG,KOG,ENOG	Nucleolar complex-associated protein	0	Sarcocystidae		0
TGME49_218130	[INTERPRO, BLASTED]	hypothetical protein TGME49_218130	264	6	1.09783e-88	97.33						no IPS match	no IPS match	no IPS match
TGME49_218215	[INTERPRO, BLASTED]	Proteophosphoglycan ppg4, related	1669	20	0	85.3						IPR022074 (PFAM)	no GO terms	no GO terms	ENOG		0	Sarcocystidae		0
TGME49_218350	[INTERPRO, BLASTED]	hypothetical protein TGME49_218350	197	5	2.12468e-143	99.39						no IPS match	no IPS match	no IPS match
TGME49_218450	[INTERPRO, BLASTED, MAPPED, ANNOTATED]	putative transmembrane protein	606	11	0	91.76	1	C:GO:0016020	C:membrane			no IPS match	no IPS match	no IPS match	ENOG		0	Sarcocystidae		0
TGME49_218460	[INTERPRO, BLASTED, MAPPED, ANNOTATED]	lectin C-type domain protein	173	15	1.41815e-102	68.93	2	F:GO:0030246; C:GO:0016020	F:carbohydrate binding; C:membrane			IPR016186 (G3DSA:3.10.100.GENE3D); IPR001304 (PFAM); IPR050828 (PANTHER); IPR001304 (PROSITE_PROFILES); cd00037 (CDD); IPR016187 (SUPERFAMILY)	no GO terms	no GO terms	ENOG		4.2e-76	Sarcocystidae		0
TGME49_218490	[INTERPRO, BLASTED]	hypothetical protein TGME49_218490	2997	20	0	96.03						IPR051352 (PANTHER)	no GO terms	no GO terms	ENOG		0	Sarcocystidae		0
TGME49_218500	[INTERPRO, BLASTED]	hypothetical protein TGRH88_058900	2333	14	0	88.49						no IPS match	no IPS match	no IPS match	ENOG		0	Sarcocystidae		0
TGME49_218510	[INTERPRO, BLASTED, MAPPED, ANNOTATED]	concanavalin A-like lectin/glucanase family protein	376	20	0	75.69	1	F:GO:0030246	F:carbohydrate binding			G3DSA:2.60.120.200 (GENE3D); PF13385 (PFAM); PTHR42535 (PANTHER); IPR013320 (SUPERFAMILY)	no GO terms	no GO terms	ENOG	Concanavalin A-like lectin/glucanases superfamily	4.6e-213	Sarcocystidae		0
TGME49_218730	[INTERPRO, BLASTED, MAPPED, ANNOTATED]	putative transmembrane protein	256	9	1.32361e-134	83.62	1	C:GO:0016020	C:membrane			no IPS match	no IPS match	no IPS match	ENOG		5.7e-122	Sarcocystidae		0
TGME49_218800	[INTERPRO, BLASTED, MAPPED, ANNOTATED]	hypothetical protein TGME49_218800	1196	15	0	85.92	1	C:GO:0005634	C:nucleus			no IPS match	no IPS match	no IPS match	ENOG		0	Sarcocystidae		0
TGME49_218830	[INTERPRO, BLASTED, MAPPED, ANNOTATED]	hypothetical protein TGME49_218830	1219	20	0	95.68	5	P:GO:0000723; P:GO:0031175; P:GO:0048168; C:GO:0005634; C:GO:0030425	P:telomere maintenance; P:neuron projection development; P:regulation of neuronal synaptic plasticity; C:nucleus; C:dendrite			PS51257 (PROSITE_PROFILES)	no GO terms	no GO terms	ENOG	embryonic skeletal system development	0	Sarcocystidae		0
TGME49_218860	[INTERPRO, BLASTED, MAPPED]	PAN domain protein	350	20	0	63.22	1	C:GO:0016020	C:membrane			PS51257 (PROSITE_PROFILES)	no GO terms	no GO terms	ENOG		7.4e-181	Sarcocystidae		0
TGME49_218890	[INTERPRO, BLASTED]	TPA: hypothetical protein BN1205_070950	1114	16	0	90.66						no IPS match	no IPS match	no IPS match	ENOG		0	Sarcocystidae		0
TGME49_218900	[INTERPRO, BLASTED, MAPPED]	TPA: hypothetical protein BN1205_070940	1035	12	0	89.72	1	C:GO:0016020	C:membrane			no IPS match	no IPS match	no IPS match	ENOG		0	Sarcocystidae		0
TGME49_218910	[INTERPRO, BLASTED, MAPPED, ANNOTATED]	putative transmembrane protein	957	20	0	73.24	1	C:GO:0016020	C:membrane			no IPS match	no IPS match	no IPS match	ENOG		0	Sarcocystidae		0
TGME49_218950	[INTERPRO, BLASTED, MAPPED, ANNOTATED]	hypothetical protein TGME49_218950	1162	11	0	87.95	2	P:GO:0031175; C:GO:0005829	P:neuron projection development; C:cytosol			IPR011989 (G3DSA:1.25.10.GENE3D); IPR016024 (SUPERFAMILY)	no GO terms	no GO terms	ENOG		0	Sarcocystidae		0
TGME49_218955	[INTERPRO, BLASTED]	hypothetical protein TGME49_218955	150	3	7.03697e-101	99.56						no IPS match	no IPS match	no IPS match
TGME49_219090	[INTERPRO, BLASTED]	hypothetical protein TGME49_219090	172	3	3.77301e-123	99.42						no IPS match	no IPS match	no IPS match
TGME49_219110	[INTERPRO, BLASTED]	hypothetical protein TGME49_219110	373	10	0	94.11						no IPS match	no IPS match	no IPS match	ENOG		2.5e-171	Sarcocystidae		0
TGME49_219160	[INTERPRO, BLASTED, MAPPED]	PH domain-like protein	349	20	0	61.15	2	P:GO:0033617; C:GO:0005739	P:mitochondrial cytochrome c oxidase assembly; C:mitochondrion			IPR011993 (G3DSA:2.30.29.GENE3D); SSF50729 (SUPERFAMILY)	no GO terms	no GO terms	ENOG		6.5e-161	Sarcocystidae		0
TGME49_219370	[INTERPRO, BLASTED]	hypothetical protein TGME49_219370	480	10	1.06154e-97	92.97						no IPS match	no IPS match	no IPS match	ENOG		2.3e-140	Sarcocystidae		0
TGME49_219440	[INTERPRO, BLASTED, MAPPED, ANNOTATED]	beta-casp domain protein	1707	20	0	92.07	3	P:GO:0006398; F:GO:0003723; C:GO:0005847	P:mRNA 3'-end processing by stem-loop binding and cleavage; F:RNA binding; C:mRNA cleavage and polyadenylation specificity factor complex			G3DSA:3.40.50.10890 (GENE3D); IPR036866 (G3DSA:3.60.15.GENE3D); IPR036866 (SUPERFAMILY); IPR036866 (SUPERFAMILY)	no GO terms	no GO terms	ENOG		0	Sarcocystidae		0
TGME49_219460	[INTERPRO, BLASTED, MAPPED, ANNOTATED]	diphthamide biosynthesis protein 2	1283	20	0	78.52	8	P:GO:0017183; F:GO:0046872; F:GO:0051536; F:GO:0090560	P:protein histidyl modification to diphthamide; F:metal ion binding; F:iron-sulfur cluster binding; F:2-(3-amino-3-carboxypropyl)histidine synthase activity	EC:2.5.1; EC:2; EC:2.5.1.108	Transferring alkyl or aryl groups, other than methyl groups; Transferases; 2-(3-amino-3-carboxypropyl)histidine synthase	IPR016435 (NCBIFAM); IPR042265 (G3DSA:3.40.50.GENE3D); IPR042263 (G3DSA:3.40.50.GENE3D); IPR016435 (PFAM); IPR016435 (SFLD)	P:GO:0017183; F:GO:0090560	P:protein histidyl modification to diphthamide; F:2-(3-amino-3-carboxypropyl)histidine synthase activity	COG,KOG,ENOG	Putative diphthamide synthesis protein	0	Sarcocystidae		0			K17866
TGME49_219500	[INTERPRO, BLASTED]	apicomplexan specific related	628	20	0	89.69						no IPS match	no IPS match	no IPS match	ENOG		0	Sarcocystidae		0
TGME49_219530	[INTERPRO, BLASTED, MAPPED, ANNOTATED]	putative transmembrane protein	329	17	0	91.5	1	C:GO:0016020	C:membrane			no IPS match	no IPS match	no IPS match	ENOG		2e-167	Sarcocystidae		0
TGME49_219570	[INTERPRO, BLASTED]	hypothetical protein TGME49_219570	175	6	3.55091e-125	97.62						no IPS match	no IPS match	no IPS match
TGME49_219600	[INTERPRO, BLASTED, MAPPED, ANNOTATED]	RNA polymerase III RPC4	908	20	0	80.7	3	P:GO:0042797; F:GO:0003677; C:GO:0005666	P:tRNA transcription by RNA polymerase III; F:DNA binding; C:RNA polymerase III complex			IPR007811 (PFAM); IPR007811 (PANTHER)	P:GO:0006383; P:GO:0042797; F:GO:0003677; C:GO:0005666	P:transcription by RNA polymerase III; P:tRNA transcription by RNA polymerase III; F:DNA binding; C:RNA polymerase III complex	ENOG	RNA polymerase III RPC4	0	Sarcocystidae		0
TGME49_219610	[INTERPRO, BLASTED]	hypothetical protein TGME49_219610	209	9	3.49634e-153	92.34						no IPS match	no IPS match	no IPS match	ENOG		1.8e-97	Sarcocystidae		0
TGME49_219620	[INTERPRO, BLASTED, MAPPED, ANNOTATED]	ribosomal RNA large subunit methyltransferase J	678	20	0	85.78	8	P:GO:0032259; F:GO:0003723; F:GO:0008168; C:GO:0016020	P:methylation; F:RNA binding; F:methyltransferase activity; C:membrane	EC:2.1; EC:2; EC:2.1.1	Transferring one-carbon groups; Transferases; Transferring one-carbon groups	IPR029063 (G3DSA:3.40.50.GENE3D); IPR036986 (G3DSA:3.10.290.GENE3D); IPR002877 (PFAM); IPR047048 (PANTHER); cd02440 (CDD); IPR029063 (SUPERFAMILY)	P:GO:0032259; F:GO:0003723; F:GO:0008168	P:methylation; F:RNA binding; F:methyltransferase activity	COG,ENOG	FtsJ-like methyltransferase	1.7e-226	Sarcocystidae		0
TGME49_219660	[INTERPRO, BLASTED]	putative membrane attachment protein	4900	20	0	99.3						no IPS match	no IPS match	no IPS match	ENOG		0	Sarcocystidae		0
TGME49_219678	[INTERPRO, BLASTED, MAPPED]	hypothetical protein TGME49_219678	1469	11	0	87.83	1	C:GO:0080008	C:Cul4-RING E3 ubiquitin ligase complex			no IPS match	no IPS match	no IPS match	ENOG		8.9e-252	Sarcocystidae		0
TGME49_219690	[INTERPRO, BLASTED]	TPA: hypothetical protein BN1205_070160	69	9	1.63784e-41	91.92						no IPS match	no IPS match	no IPS match	ENOG		2.6e-29	Sarcocystidae		0
TGME49_219710	[INTERPRO, BLASTED, MAPPED, ANNOTATED]	hypothetical protein TGME49_219710	1893	20	0	73.33	3	P:GO:0031087; P:GO:0051276; C:GO:0000932	P:deadenylation-independent decapping of nuclear-transcribed mRNA; P:chromosome organization; C:P-body			no IPS match	no IPS match	no IPS match	ENOG		0	Sarcocystidae		0
TGME49_219730	[INTERPRO, BLASTED]	hypothetical protein TGME49_219730	438	7	0	98.63						no IPS match	no IPS match	no IPS match	ENOG		1.8e-248	Sarcocystidae		0
TGME49_219742	[INTERPRO, BLASTED, MAPPED, ANNOTATED]	hypothetical protein TGME49_219742	446	20	0	82.44	1	C:GO:0016020	C:membrane			no IPS match	no IPS match	no IPS match	ENOG		7.4e-210	Sarcocystidae		0
TGME49_219780	[INTERPRO, BLASTED]	hypothetical protein TGME49_219780	102	3	3.12333e-29	98.04						no IPS match	no IPS match	no IPS match
TGME49_219840	[INTERPRO, BLASTED]	hypothetical protein TGME49_219840	295	6	1.40273e-170	99.1						no IPS match	no IPS match	no IPS match
TGME49_220025	[INTERPRO, BLASTED]	hypothetical protein TGME49_220025	909	9	0	98.39						no IPS match	no IPS match	no IPS match	KOG,ENOG	iron transporter MirB	0.042	Glomerellales		0
TGME49_220060	[INTERPRO, BLASTED]	hypothetical protein TGME49_220060	116	16	1.59619e-79	94.51						no IPS match	no IPS match	no IPS match
TGME49_220070	[INTERPRO, BLASTED]	hypothetical protein TGME49_220070	155	3	7.60921e-88	99.47						no IPS match	no IPS match	no IPS match
TGME49_220110	[INTERPRO, BLASTED]	hypothetical protein TGME49_220110	2521	14	0	90.05						no IPS match	no IPS match	no IPS match	ENOG		0	Sarcocystidae		0
TGME49_220132	[INTERPRO, BLASTED]	TPA: hypothetical protein BN1205_087385	3149	12	0	92.64						no IPS match	no IPS match	no IPS match	ENOG		0	Sarcocystidae		0
TGME49_220145	[INTERPRO, BLASTED]	hypothetical protein TGME49_220145	206	6	1.0718e-138	98.36						no IPS match	no IPS match	no IPS match
TGME49_220175	[INTERPRO, BLASTED]	hypothetical protein TGME49_220175	692	12	0	89.22						no IPS match	no IPS match	no IPS match	ENOG		6.6e-173	Sarcocystidae		0
TGME49_220180	[INTERPRO, BLASTED]	hypothetical protein TGME49_220180	318	3	4.77786e-135	98.38						no IPS match	no IPS match	no IPS match
TGME49_220190	[INTERPRO, BLASTED, MAPPED, ANNOTATED]	putative transmembrane protein	560	20	1.59018e-178	94.93	1	C:GO:0016020	C:membrane			G3DSA:1.20.5.110 (GENE3D); IPR000727 (PROSITE_PROFILES); SSF58038 (SUPERFAMILY)	no GO terms	no GO terms	ENOG		1.1e-221	Sarcocystidae		0
TGME49_220200	[INTERPRO, BLASTED, MAPPED]	Chromosome III, complete sequence, related	680	20	0	80.9	1	F:GO:0004519	F:endonuclease activity			no IPS match	no IPS match	no IPS match	ENOG		6.2e-301	Sarcocystidae		0
TGME49_220208	[INTERPRO, BLASTED, MAPPED, ANNOTATED]	hypothetical protein TGME49_220208	2590	20	0	96.52	8	P:GO:0006357; P:GO:0007399; P:GO:0016973; P:GO:0048468; P:GO:0071763; F:GO:0000978; F:GO:0000981; C:GO:0005635	P:regulation of transcription by RNA polymerase II; P:nervous system development; P:poly(A)+ mRNA export from nucleus; P:cell development; P:nuclear membrane organization; F:RNA polymerase II cis-regulatory region sequence-specific DNA binding; F:DNA-binding transcription factor activity, RNA polymerase II-specific; C:nuclear envelope			PTHR33416 (PANTHER)	P:GO:0071763; C:GO:0005635	P:nuclear membrane organization; C:nuclear envelope	ENOG		0	Sarcocystidae		0
TGME49_220260	[INTERPRO, BLASTED, MAPPED, ANNOTATED]	hypothetical protein TGME49_220260	596	20	0	76.07	4	P:GO:0000712; P:GO:0000724; C:GO:0016604; C:GO:0031422	P:resolution of meiotic recombination intermediates; P:double-strand break repair via homologous recombination; C:nuclear body; C:RecQ family helicase-topoisomerase III complex			IPR013894 (PFAM); IPR042470 (G3DSA:2.40.50.GENE3D); PTHR14790 (PANTHER)	P:GO:0000712; P:GO:0000724; C:GO:0016604; C:GO:0031422	P:resolution of meiotic recombination intermediates; P:double-strand break repair via homologous recombination; C:nuclear body; C:RecQ family helicase-topoisomerase III complex	ENOG	RecQ mediated genome instability protein	2.3e-283	Sarcocystidae		0
TGME49_220290	[INTERPRO, BLASTED, MAPPED, ANNOTATED]	putative flagellar associated, related protein	2141	20	0	96.91	1	C:GO:0031514	C:motile cilium			IPR013783 (G3DSA:2.60.40.GENE3D); PF14874 (PFAM); IPR013783 (G3DSA:2.60.40.GENE3D); PTHR22538 (PANTHER)	no GO terms	no GO terms	ENOG	Flagellar-associated PapD-like	0	Sarcocystidae		0
TGME49_220310	[INTERPRO, BLASTED, MAPPED, ANNOTATED]	putative transmembrane protein	156	7	1.56729e-108	98.17	1	C:GO:0016020	C:membrane			no IPS match	no IPS match	no IPS match
TGME49_220330	[INTERPRO, BLASTED, MAPPED, ANNOTATED]	putative transmembrane protein	545	10	0	95.81	1	C:GO:0016020	C:membrane			no IPS match	no IPS match	no IPS match	ENOG		7.3e-268	Sarcocystidae		0
TGME49_220370	[INTERPRO, BLASTED]	putative 200 kDa antigen p200	1207	14	0	93.59						no IPS match	no IPS match	no IPS match	ENOG		0	Sarcocystidae		0
TGME49_220380	[INTERPRO, BLASTED, MAPPED, ANNOTATED]	putative transmembrane protein	1052	13	0	87.85	1	C:GO:0016020	C:membrane			no IPS match	no IPS match	no IPS match	ENOG		0	Sarcocystidae		0
TGME49_220390	[INTERPRO, BLASTED, MAPPED, ANNOTATED]	putative transmembrane protein	274	20	0	65.48	1	C:GO:0016020	C:membrane			no IPS match	no IPS match	no IPS match	ENOG		9.3e-147	Sarcocystidae		0
TGME49_220430	[INTERPRO, BLASTED, MAPPED, ANNOTATED]	putative transmembrane protein	1618	14	0	86.11	1	C:GO:0016020	C:membrane			IPR036259 (G3DSA:1.20.1250.GENE3D)	no GO terms	no GO terms	ENOG		0	Sarcocystidae		0
TGME49_220470	[INTERPRO, BLASTED]	putative RNase protein H	1344	14	0	91.36						no IPS match	no IPS match	no IPS match	ENOG		0	Sarcocystidae		0
TGME49_220480	[INTERPRO, BLASTED, MAPPED, ANNOTATED]	TPA: DNA-directed RNA polymerase II subunit RPB1	1055	14	0	90.24	1	C:GO:0000428	C:DNA-directed RNA polymerase complex			no IPS match	no IPS match	no IPS match	ENOG		0	Sarcocystidae		0
TGME49_220510	[INTERPRO, BLASTED]	hypothetical protein TGME49_220510	627	12	0	88.3						no IPS match	no IPS match	no IPS match	ENOG		9.4e-203	Sarcocystidae		0
TGME49_220520	[INTERPRO, BLASTED, MAPPED]	glycoprotein 96-92, putative	2297	19	0	85.83	5	P:GO:0006355; F:GO:0000976; F:GO:0003677; F:GO:0003700; C:GO:0005634	P:regulation of DNA-templated transcription; F:transcription cis-regulatory region binding; F:DNA binding; F:DNA-binding transcription factor activity; C:nucleus			no IPS match	no IPS match	no IPS match	ENOG		0	Sarcocystidae		0
TGME49_220525	[INTERPRO, BLASTED, MAPPED, ANNOTATED]	putative transmembrane protein	104	7	5.72121e-37	95.42	5	P:GO:0006355; F:GO:0003677; F:GO:0003700; C:GO:0005634; C:GO:0016020	P:regulation of DNA-templated transcription; F:DNA binding; F:DNA-binding transcription factor activity; C:nucleus; C:membrane			no IPS match	no IPS match	no IPS match
TGME49_220540	[INTERPRO, BLASTED, MAPPED, ANNOTATED]	putative transmembrane protein	296	8	4.92024e-177	98.52	1	C:GO:0016020	C:membrane			no IPS match	no IPS match	no IPS match	ENOG		6.1e-144	Sarcocystidae		0
TGME49_220585	[INTERPRO, BLASTED]	hypothetical protein TGME49_220585	1234	8	0	91.73						no IPS match	no IPS match	no IPS match	ENOG		0	Sarcocystidae		0
TGME49_220630	[INTERPRO, BLASTED]	hypothetical protein TGME49_220630	939	20	0	88.03						no IPS match	no IPS match	no IPS match	ENOG	Encoded by	8.3e-203	Sarcocystidae		0
TGME49_220640	[INTERPRO, BLASTED]	hypothetical protein TGME49_220640	460	20	0	91.39						no IPS match	no IPS match	no IPS match	ENOG	Encoded by	4.6e-154	Sarcocystidae		0
TGME49_220650	[INTERPRO, BLASTED]	hypothetical protein TGME49_220650	317	20	2.56718e-166	93.51						no IPS match	no IPS match	no IPS match	ENOG	Encoded by	4e-85	Sarcocystidae		0
TGME49_220720	[INTERPRO, BLASTED]	hypothetical protein TGME49_220720	118	20	2.35648e-65	96.64						no IPS match	no IPS match	no IPS match	ENOG		4.9e-60	Sarcocystidae		0
TGME49_220730	[INTERPRO, BLASTED]	hypothetical protein TGME49_220730	113	20	4.05738e-78	95.69						no IPS match	no IPS match	no IPS match
TGME49_220740	[INTERPRO, BLASTED]	putative transmembrane protein	365	20	0	59.73						no IPS match	no IPS match	no IPS match
TGME49_220850	[INTERPRO, BLASTED]	hypothetical protein TGME49_220850	201	5	1.03925e-144	99.6						no IPS match	no IPS match	no IPS match
TGME49_220870	[INTERPRO, BLASTED, MAPPED, ANNOTATED]	putative transmembrane protein	174	20	1.0753e-119	63.78	1	C:GO:0016020	C:membrane			no IPS match	no IPS match	no IPS match	ENOG		7.1e-92	Sarcocystidae		0
TGME49_220920	[INTERPRO, BLASTED, MAPPED, ANNOTATED]	hypothetical protein TGME49_220920	1675	17	0	89.73	5	P:GO:0007004; P:GO:0050821; F:GO:0042162; F:GO:0051879; C:GO:0005829	P:telomere maintenance via telomerase; P:protein stabilization; F:telomeric DNA binding; F:Hsp90 protein binding; C:cytosol			no IPS match	no IPS match	no IPS match	ENOG		0	Sarcocystidae		0
TGME49_220950	[INTERPRO, BLASTED, MAPPED, ANNOTATED]	mitochondrial association factor 1	363	20	0	96.86	2	C:GO:0020005; C:GO:0030659	C:symbiont-containing vacuole membrane; C:cytoplasmic vesicle membrane			cd21101 (CDD); SSF101447 (SUPERFAMILY)	no GO terms	no GO terms	ENOG		5.2e-129	Sarcocystidae		0
TGME49_221180	[INTERPRO, BLASTED, MAPPED, ANNOTATED]	putative transmembrane protein	768	20	0	93.62	1	C:GO:0016020	C:membrane			no IPS match	no IPS match	no IPS match	ENOG		0	Sarcocystidae		0
TGME49_221220	[INTERPRO, BLASTED, MAPPED, ANNOTATED]	putative coiled-coil protein	1938	20	0	97.75	4	P:GO:0007288; C:GO:0005737; C:GO:0016020; C:GO:0036126	P:sperm axoneme assembly; C:cytoplasm; C:membrane; C:sperm flagellum			IPR013783 (G3DSA:2.60.40.GENE3D); IPR013783 (G3DSA:2.60.40.GENE3D); IPR013783 (G3DSA:2.60.40.GENE3D); IPR052614 (PANTHER)	no GO terms	no GO terms	ENOG		0	Sarcocystidae		0
TGME49_221240	[INTERPRO, BLASTED, MAPPED, ANNOTATED]	putative transmembrane protein	103	8	6.81668e-69	99.03	1	C:GO:0016020	C:membrane			no IPS match	no IPS match	no IPS match
TGME49_221250	[INTERPRO, BLASTED]	phospho-2-dehydro-3-deoxyheptonate aldolase,related protein	1052	20	0	79.77						no IPS match	no IPS match	no IPS match	ENOG		0	Sarcocystidae		0
TGME49_221265	[INTERPRO, BLASTED, MAPPED]	hypothetical protein TGME49_221265	666	13	0	79.33	4	P:GO:0000455; P:GO:0001522; F:GO:0003723; F:GO:0009982	P:enzyme-directed rRNA pseudouridine synthesis; P:pseudouridine synthesis; F:RNA binding; F:pseudouridine synthase activity			no IPS match	no IPS match	no IPS match
TGME49_221275	[INTERPRO, BLASTED]	hypothetical protein TGME49_221275	146	6	9.36492e-86	98.43						no IPS match	no IPS match	no IPS match
TGME49_221280	[INTERPRO, BLASTED]	TPA: hypothetical protein BN1205_051920	4120	19	0	92.26						no IPS match	no IPS match	no IPS match	ENOG		0	Sarcocystidae		0
TGME49_221295	[INTERPRO, BLASTED]	hypothetical protein TGME49_221295	196	7	1.35198e-144	94.97						no IPS match	no IPS match	no IPS match
TGME49_221370	[INTERPRO, BLASTED]	hypothetical protein TGME49_221370	1346	15	0	89.28						PS51257 (PROSITE_PROFILES)	no GO terms	no GO terms	ENOG	Pleckstrin homology domain.	0	Sarcocystidae		0
TGME49_221390	[INTERPRO, BLASTED, MAPPED]	dual-specificity catalytic domain-containing	875	15	0	88.15	2	P:GO:0000492; C:GO:0005634	P:box C/D snoRNP assembly; C:nucleus			no IPS match	no IPS match	no IPS match	ENOG		2.5e-302	Sarcocystidae		0
TGME49_221400	[INTERPRO, BLASTED]	putative proteophosphoglycan ppg4, related protein	2001	14	0	93.34						no IPS match	no IPS match	no IPS match	ENOG		0	Sarcocystidae		0
TGME49_221415	[INTERPRO, BLASTED]	hypothetical protein TGME49_221415	88	4	7.09564e-58	99.72						no IPS match	no IPS match	no IPS match
TGME49_221430	[INTERPRO, BLASTED]	putative transmembrane protein	835	17	0	89.66						no IPS match	no IPS match	no IPS match	ENOG		1.8e-281	Sarcocystidae		0
TGME49_221455	[INTERPRO, BLASTED]	hypothetical protein TGME49_221455	273	10	5.18534e-155	96.69						no IPS match	no IPS match	no IPS match
TGME49_221470	[INTERPRO, BLASTED]	hypothetical protein TGME49_221470	552	20	0	82.98						no IPS match	no IPS match	no IPS match	ENOG		0	Sarcocystidae		0
TGME49_221480	[INTERPRO, BLASTED, MAPPED, ANNOTATED]	putative transmembrane protein	271	11	3.75717e-176	97.18	1	C:GO:0016020	C:membrane			no IPS match	no IPS match	no IPS match	ENOG		1.8e-134	Sarcocystidae		0
TGME49_221530	[INTERPRO, BLASTED]	hypothetical protein TGME49_221530	445	15	0	90.37						no IPS match	no IPS match	no IPS match	ENOG		5.3e-208	Sarcocystidae		0
TGME49_221560	[INTERPRO, BLASTED]	putative TBP-binding protein ABT1	551	18	0	92.05						no IPS match	no IPS match	no IPS match	ENOG		8.9e-181	Sarcocystidae		0
TGME49_221585	[INTERPRO, BLASTED]	hypothetical protein TGME49_221585	102	5	3.04769e-71	98.82						no IPS match	no IPS match	no IPS match
TGME49_221640	[INTERPRO, BLASTED, MAPPED, ANNOTATED]	putative ppg3	1271	16	0	90.62	1	C:GO:0016020	C:membrane			no IPS match	no IPS match	no IPS match	ENOG		0	Sarcocystidae		0
TGME49_221665	[INTERPRO, BLASTED]	hypothetical protein TGME49_221665	785	8	0	99.59						no IPS match	no IPS match	no IPS match
TGME49_221675	[INTERPRO, BLASTED, MAPPED, ANNOTATED]	putative transmembrane protein	1430	20	0	98.91	12	P:GO:0000462; P:GO:0000479; F:GO:0003924; F:GO:0005525; F:GO:0034511; C:GO:0030686	P:maturation of SSU-rRNA from tricistronic rRNA transcript (SSU-rRNA, 5.8S rRNA, LSU-rRNA); P:endonucleolytic cleavage of tricistronic rRNA transcript (SSU-rRNA, 5.8S rRNA, LSU-rRNA); F:GTPase activity; F:GTP binding; F:U3 snoRNA binding; C:90S preribosome	EC:3.6.1; EC:3.6; EC:3; EC:3.6.1.15	Acting on acid anhydrides; Acting on acid anhydrides; Hydrolases; nucleoside-triphosphate phosphatase	no IPS match	no IPS match	no IPS match	COG,KOG,ENOG	Nuclear chaperone required for maturation and nuclear export of pre-60S ribosome subunits	8.6e-127	Sarcocystidae		0
TGME49_221685	[INTERPRO, BLASTED]	hypothetical protein TGME49_221685	347	20	0	56.84				EC:3.4.23.25	saccharopepsin	no IPS match	no IPS match	no IPS match	KOG,ENOG	Eukaryotic aspartyl protease	1e-12	Peronosporales	EC:3.4.23.25	0			K01381	map04138
TGME49_221690	[INTERPRO, BLASTED, MAPPED, ANNOTATED]	hypothetical protein TGME49_221690	1410	20	0	89.82	2	P:GO:0006606; C:GO:0005737	P:protein import into nucleus; C:cytoplasm			IPR011989 (G3DSA:1.25.10.GENE3D); IPR016024 (SUPERFAMILY)	no GO terms	no GO terms	ENOG		0	Sarcocystidae		0
TGME49_221720	[INTERPRO, BLASTED, MAPPED]	putative Tbc domain,related protein	3082	19	0	90.31	2	F:GO:0004674; F:GO:0016740	F:protein serine/threonine kinase activity; F:transferase activity			no IPS match	no IPS match	no IPS match	COG,KOG,ENOG	Rab-GTPase-TBC domain	0	Sarcocystidae		0
TGME49_221818	[INTERPRO, BLASTED, MAPPED, ANNOTATED]	methyltransferase domain protein	321	20	3.76413e-164	80.29	6	P:GO:0032259; F:GO:0008168; C:GO:0016020	P:methylation; F:methyltransferase activity; C:membrane	EC:2.1; EC:2; EC:2.1.1	Transferring one-carbon groups; Transferases; Transferring one-carbon groups	IPR029063 (G3DSA:3.40.50.GENE3D); IPR051419 (PANTHER); IPR029063 (SUPERFAMILY)	no GO terms	no GO terms	KOG,ENOG	methyltransferase activity	2.3e-136	Sarcocystidae		0
TGME49_221840	[INTERPRO, BLASTED]	hypothetical protein TGVEG_221840	420	8	0	97.42						no IPS match	no IPS match	no IPS match	ENOG		3.3e-236	Sarcocystidae		0
TGME49_221855	[INTERPRO, BLASTED, MAPPED, ANNOTATED]	putative transmembrane protein	270	7	9.75201e-127	98.67	1	C:GO:0016020	C:membrane			no IPS match	no IPS match	no IPS match
TGME49_221860	[INTERPRO, BLASTED]	hypothetical protein TGME49_221860	117	7	1.04259e-21	98.7						no IPS match	no IPS match	no IPS match
TGME49_221865	[INTERPRO, BLASTED]	hypothetical protein TGME49_221865	113	8	6.95666e-65	97.78						no IPS match	no IPS match	no IPS match
TGME49_221870	[INTERPRO, BLASTED]	hypothetical protein TGME49_221870	1373	18	0	89.93						no IPS match	no IPS match	no IPS match	ENOG		0	Sarcocystidae		0
TGME49_221900	[INTERPRO, BLASTED]	putative awp1	222	15	7.66304e-130	92.36						no IPS match	no IPS match	no IPS match	ENOG		6.1e-104	Sarcocystidae		0
TGME49_221930	[INTERPRO, BLASTED, MAPPED, ANNOTATED]	hypothetical protein TGRH88_000940	378	7	0	92.81	1	C:GO:0016020	C:membrane			no IPS match	no IPS match	no IPS match	ENOG		5.8e-115	Sarcocystidae		0
TGME49_221990	[INTERPRO, BLASTED]	hypothetical protein TGME49_221990	586	13	0	95						no IPS match	no IPS match	no IPS match	ENOG		7.1e-245	Sarcocystidae		0
TGME49_222030	[INTERPRO, BLASTED]	hypothetical protein TGME49_222030	997	20	0	84.17						IPR029063 (G3DSA:3.40.50.GENE3D)	no GO terms	no GO terms	ENOG	Encoded by	0	Sarcocystidae		0
TGME49_222050	[INTERPRO, BLASTED]	hypothetical protein TGME49_222050	1477	13	0	93.08						no IPS match	no IPS match	no IPS match	ENOG		0	Sarcocystidae		0
TGME49_222075	[INTERPRO, BLASTED]	putative transmembrane protein	110	6	5.72124e-76	99.7						no IPS match	no IPS match	no IPS match
TGME49_222080	[INTERPRO, BLASTED, MAPPED, ANNOTATED]	putative transmembrane protein	163	5	8.41688e-93	100	1	C:GO:0016020	C:membrane			no IPS match	no IPS match	no IPS match	ENOG		5.3e-81	Sarcocystidae		0
TGME49_222090	[INTERPRO, BLASTED, MAPPED, ANNOTATED]	Rab5-interacting (Rab5ip) protein	133	6	7.75938e-59	87.54	2	P:GO:0097250; C:GO:0005789	P:mitochondrial respirasome assembly; C:endoplasmic reticulum membrane			IPR029008 (PFAM); IPR010742 (PANTHER)	P:GO:0097250	P:mitochondrial respirasome assembly	KOG,ENOG	Rab5-interacting protein (Rab5ip)	2.3e-66	Sarcocystidae		0
TGME49_222130	[INTERPRO, BLASTED, MAPPED, ANNOTATED]	os07g0295200 protein, related	198	20	2.07452e-144	69.57	3	P:GO:0006888; P:GO:0090158; C:GO:0005737	P:endoplasmic reticulum to Golgi vesicle-mediated transport; P:endoplasmic reticulum membrane organization; C:cytoplasm			IPR029704 (PANTHER)	P:GO:0006888; P:GO:0090158	P:endoplasmic reticulum to Golgi vesicle-mediated transport; P:endoplasmic reticulum membrane organization	ENOG	zinc finger	1.5e-114	Sarcocystidae		0
TGME49_222155	[INTERPRO, BLASTED]	TPA: hypothetical protein BN1205_052903	1459	6	0	82.29						no IPS match	no IPS match	no IPS match
TGME49_222180	[INTERPRO, BLASTED, MAPPED, ANNOTATED]	U3 small nucleolar RNA-associated protein 5	200	20	6.2284e-143	90.17	6	P:GO:0000462; P:GO:0006412; F:GO:0003735; C:GO:0005730; C:GO:0005840; C:GO:1990904	P:maturation of SSU-rRNA from tricistronic rRNA transcript (SSU-rRNA, 5.8S rRNA, LSU-rRNA); P:translation; F:structural constituent of ribosome; C:nucleolus; C:ribosome; C:ribonucleoprotein complex			no IPS match	no IPS match	no IPS match	ENOG		7.9e-103	Sarcocystidae		0			K14546	map03008
TGME49_222240	[INTERPRO, BLASTED]	hypothetical protein TGME49_222240	1023	11	0	91.84						no IPS match	no IPS match	no IPS match	ENOG		0	Sarcocystidae		0
TGME49_222250	[INTERPRO, BLASTED]	hypothetical protein TGME49_222250	1541	15	0	86						G3DSA:2.60.200.20 (GENE3D); cd00060 (CDD); IPR008984 (SUPERFAMILY)	F:GO:0005515	F:protein binding	ENOG		0	Sarcocystidae		0
TGME49_222260	[INTERPRO, BLASTED, MAPPED, ANNOTATED]	putative transmembrane protein	94	20	4.25115e-59	83.99	1	C:GO:0016020	C:membrane			no IPS match	no IPS match	no IPS match	ENOG	Encoded by	3.7e-42	Sarcocystidae		0
TGME49_222270	[INTERPRO, BLASTED, MAPPED]	hypothetical protein TGME49_222270	387	20	0	89.05	3	P:GO:0015979; C:GO:0016020; C:GO:0030089	P:photosynthesis; C:membrane; C:phycobilisome			no IPS match	no IPS match	no IPS match	ENOG		1.3e-210	Sarcocystidae		0
TGME49_222280	[INTERPRO, BLASTED, MAPPED, ANNOTATED]	putative transmembrane protein	258	13	2.3386e-143	89.73	1	C:GO:0016020	C:membrane			no IPS match	no IPS match	no IPS match	ENOG		1.5e-133	Sarcocystidae		0
TGME49_222300	[INTERPRO, BLASTED, MAPPED, ANNOTATED]	putative transmembrane protein	1476	20	0	82.11	1	C:GO:0035267	C:NuA4 histone acetyltransferase complex			no IPS match	no IPS match	no IPS match	ENOG	skin development	0	Sarcocystidae		0
TGME49_222305	[INTERPRO, BLASTED, MAPPED, ANNOTATED]	putative transmembrane protein	133	5	3.40637e-79	98.82	1	C:GO:0016020	C:membrane			no IPS match	no IPS match	no IPS match
TGME49_222330	[INTERPRO, BLASTED, MAPPED, ANNOTATED]	putative transmembrane protein	2320	18	0	92.05	2	P:GO:0031087; C:GO:0000932	P:deadenylation-independent decapping of nuclear-transcribed mRNA; C:P-body			IPR007110 (PROSITE_PROFILES)	no GO terms	no GO terms	ENOG		0	Sarcocystidae		0
TGME49_222350	[INTERPRO, BLASTED, MAPPED, ANNOTATED]	putative transmembrane protein	410	20	0	90.53	1	C:GO:0016020	C:membrane			no IPS match	no IPS match	no IPS match	ENOG		2.8e-203	Sarcocystidae		0
TGME49_222385	[INTERPRO, BLASTED]	hypothetical protein TGRH88_001430	933	12	0	91.11						no IPS match	no IPS match	no IPS match
TGME49_222390	[INTERPRO, BLASTED]	hypothetical protein TGME49_222390	316	20	0	83.94						no IPS match	no IPS match	no IPS match	ENOG		3e-157	Sarcocystidae		0
TGME49_222400	[INTERPRO, BLASTED, MAPPED, ANNOTATED]	putative transmembrane protein	627	13	0	92.12	1	C:GO:0016020	C:membrane			no IPS match	no IPS match	no IPS match	ENOG		0	Sarcocystidae		0
TGME49_222420	[INTERPRO, BLASTED, MAPPED, ANNOTATED]	putative transmembrane protein	576	11	0	92.94	1	C:GO:0016020	C:membrane			no IPS match	no IPS match	no IPS match	ENOG		0	Sarcocystidae		0
TGME49_222700	[INTERPRO, BLASTED]	TPA: hypothetical protein BN1205_053210	1253	20	0	80.98						no IPS match	no IPS match	no IPS match	ENOG		1.1e-290	Sarcocystidae		0
TGME49_222880	[INTERPRO, BLASTED]	hypothetical protein TGPRC2_222880	790	15	0	91.37						no IPS match	no IPS match	no IPS match	ENOG		0	Sarcocystidae		0
TGME49_222930	[INTERPRO, BLASTED, MAPPED, ANNOTATED]	fibronectin-binding A domain protein	308	20	0	68.25	6	P:GO:0072344; P:GO:1990116; F:GO:0000049; F:GO:0043023; C:GO:0016020; C:GO:1990112	P:rescue of stalled ribosome; P:ribosome-associated ubiquitin-dependent protein catabolic process; F:tRNA binding; F:ribosomal large subunit binding; C:membrane; C:RQC complex			IPR008532 (PFAM); IPR051608 (PANTHER)	P:GO:0072344; F:GO:0000049; F:GO:0043023; C:GO:1990112	P:rescue of stalled ribosome; F:tRNA binding; F:ribosomal large subunit binding; C:RQC complex	COG,ENOG	Domain of unknown function (DUF814)	4e-178	Sarcocystidae		0
TGME49_222935	[INTERPRO, BLASTED, MAPPED, ANNOTATED]	hypothetical protein TGME49_222935	329	5	0	96.09	5	P:GO:0072344; P:GO:1990116; F:GO:0000049; F:GO:0043023; C:GO:1990112	P:rescue of stalled ribosome; P:ribosome-associated ubiquitin-dependent protein catabolic process; F:tRNA binding; F:ribosomal large subunit binding; C:RQC complex			no IPS match	no IPS match	no IPS match
TGME49_222940	[INTERPRO, BLASTED]	putative oocyst wall protein	489	20	0	71.33						no IPS match	no IPS match	no IPS match	ENOG		2.1e-274	Sarcocystidae		0
TGME49_222948	[INTERPRO, BLASTED]	hypothetical protein TGME49_222948	124	1	1.7378e-85	100						no IPS match	no IPS match	no IPS match
TGME49_223025	[INTERPRO, BLASTED]	hypothetical protein TGME49_223025	69	3	1.16019e-42	98.55						no IPS match	no IPS match	no IPS match
TGME49_223040	[INTERPRO, BLASTED]	Chain H, ATPTG6	239	20	0	71.97						no IPS match	no IPS match	no IPS match	ENOG		8.7e-141	Sarcocystidae		0
TGME49_223045	[INTERPRO, BLASTED]	hypothetical protein TGME49_223045	84	5	1.67101e-56	97.46						no IPS match	no IPS match	no IPS match
TGME49_223070	[INTERPRO, BLASTED]	hypothetical protein TGME49_223070	211	12	4.33984e-155	77.76						no IPS match	no IPS match	no IPS match	ENOG		6.8e-121	Sarcocystidae		0
TGME49_223080	[INTERPRO, BLASTED]	hypothetical protein TGME49_223080	2909	20	0	90.61						no IPS match	no IPS match	no IPS match	ENOG		0	Sarcocystidae		0
TGME49_223095	[INTERPRO, BLASTED, MAPPED]	hypothetical protein TGME49_223095	754	19	0	77.55	6	P:GO:0006357; F:GO:0000978; F:GO:0000981; C:GO:0005634; C:GO:0005654; C:GO:0005730	P:regulation of transcription by RNA polymerase II; F:RNA polymerase II cis-regulatory region sequence-specific DNA binding; F:DNA-binding transcription factor activity, RNA polymerase II-specific; C:nucleus; C:nucleoplasm; C:nucleolus			PTHR33477 (PANTHER); IPR027417 (SUPERFAMILY)	no GO terms	no GO terms	ENOG		0	Sarcocystidae		0
TGME49_223270	[INTERPRO, BLASTED]	hypothetical protein TGME49_223270	1352	15	0	88.76						no IPS match	no IPS match	no IPS match	ENOG		0	Sarcocystidae		0
TGME49_223400	[INTERPRO, BLASTED]	hypothetical protein TGRUB_223400	117	5	2.79738e-42	98.41						no IPS match	no IPS match	no IPS match	ENOG		6.2e-31	Sarcocystidae		0
TGME49_223430	[INTERPRO, BLASTED, MAPPED, ANNOTATED]	putative transmembrane protein	753	15	0	82.2	1	F:GO:0051537	F:2 iron, 2 sulfur cluster binding			no IPS match	no IPS match	no IPS match	ENOG		0	Sarcocystidae		0
TGME49_223470	[INTERPRO, BLASTED]	hypothetical protein TGME49_223470	168	2	1.91879e-117	99.54						no IPS match	no IPS match	no IPS match
TGME49_223490	[INTERPRO, BLASTED, MAPPED, ANNOTATED]	hypothetical protein TGME49_223490	312	20	2.18445e-160	82.16	8	P:GO:0009062; P:GO:0019432; P:GO:0032869; P:GO:0045944; F:GO:0003713; F:GO:0008195; C:GO:0005730; C:GO:0016020	P:fatty acid catabolic process; P:triglyceride biosynthetic process; P:cellular response to insulin stimulus; P:positive regulation of transcription by RNA polymerase II; F:transcription coactivator activity; F:phosphatidate phosphatase activity; C:nucleolus; C:membrane	EC:3.1.3.4	phosphatidate phosphatase	IPR005579 (PFAM); IPR026570 (PANTHER)	C:GO:0005730	C:nucleolus	ENOG	Cgr1 family	1.9e-87	Sarcocystidae		0
TGME49_223500	[INTERPRO, BLASTED]	hypothetical protein TGME49_223500	1112	18	0	92.97						no IPS match	no IPS match	no IPS match	ENOG		0	Sarcocystidae		0
TGME49_223550	[INTERPRO, BLASTED, MAPPED, ANNOTATED]	putative transmembrane protein	407	7	0	86.23	1	C:GO:0016020	C:membrane			no IPS match	no IPS match	no IPS match	ENOG		4.2e-220	Sarcocystidae		0
TGME49_223560	[INTERPRO, BLASTED, MAPPED, ANNOTATED]	putative transmembrane protein	470	11	0	86.82	1	C:GO:0016020	C:membrane			no IPS match	no IPS match	no IPS match	ENOG		1.8e-230	Sarcocystidae		0
TGME49_223600	[INTERPRO, BLASTED, MAPPED, ANNOTATED]	putative transmembrane protein	744	16	0	91.88	1	C:GO:0016020	C:membrane			no IPS match	no IPS match	no IPS match	ENOG		1.1e-261	Sarcocystidae		0
TGME49_223610	[INTERPRO, BLASTED]	hypothetical protein TGME49_223610	1297	15	0	94.33						no IPS match	no IPS match	no IPS match	ENOG		0	Sarcocystidae		0
TGME49_223685	[INTERPRO, BLASTED]	hypothetical protein TGME49_223685	157	4	2.75811e-110	86.36						no IPS match	no IPS match	no IPS match
TGME49_223690	[INTERPRO, BLASTED, MAPPED, ANNOTATED]	DNA-directed RNA polymerase III subunit Rpc31	209	13	4.40182e-120	75.49	2	P:GO:0006383; C:GO:0005666	P:transcription by RNA polymerase III; C:RNA polymerase III complex			IPR024661 (PFAM); IPR024661 (PANTHER)	P:GO:0006383; C:GO:0005666	P:transcription by RNA polymerase III; C:RNA polymerase III complex	ENOG	DNA-directed RNA polymerase III subunit RPC7-like	2.1e-114	Sarcocystidae		0			K03024	map00230,map00240,map01100,map03020,map04623,map05169
TGME49_223725	[INTERPRO, BLASTED]	hypothetical protein TGME49_223725	4187	20	0	99.36						no IPS match	no IPS match	no IPS match	ENOG		0	Sarcocystidae		0
TGME49_223750	[INTERPRO, BLASTED]	AGAP002737-PA, related	681	13	0	90.6						no IPS match	no IPS match	no IPS match	ENOG		2e-134	Sarcocystidae		0
TGME49_223760	[INTERPRO, BLASTED]	hypothetical protein TGME49_223760	1588	17	0	86.03						no IPS match	no IPS match	no IPS match	ENOG		0	Sarcocystidae		0
TGME49_223770	[INTERPRO, BLASTED]	hypothetical protein TGME49_223770	119	7	8.80387e-82	94.37						no IPS match	no IPS match	no IPS match	ENOG		3.4e-61	Sarcocystidae		0
TGME49_223790	[INTERPRO, BLASTED]	apicomplexan specific, related protein	1003	20	0	88.63						no IPS match	no IPS match	no IPS match	ENOG		0	Sarcocystidae		0
TGME49_223800	[INTERPRO, BLASTED, MAPPED, ANNOTATED]	folate receptor family protein	526	20	0	75.85	1	C:GO:0016020	C:membrane			IPR018143 (PFAM); IPR053305 (PANTHER)	no GO terms	no GO terms	ENOG		7.1e-212	Sarcocystidae		0
TGME49_223845	[INTERPRO, BLASTED, MAPPED, ANNOTATED]	Josephin-2	719	20	0	62.2	2	P:GO:0006508; F:GO:0004843	P:proteolysis; F:cysteine-type deubiquitinase activity	EC:3.4.19.12	ubiquitinyl hydrolase 1	IPR040053 (PANTHER)	P:GO:0016579; F:GO:0004843	P:protein deubiquitination; F:cysteine-type deubiquitinase activity	KOG	thiol-dependent ubiquitin-specific protease activity	0.015	Eukaryota	EC:1.4.1.21; EC:3.4.19.12	5	F:GO:0004843; P:GO:0044237; P:GO:0006508; P:GO:0016579; C:GO:0005829	P:protein deubiquitination; P:proteolysis; F:cysteine-type deubiquitinase activity; P:cellular metabolic process; C:cytosol	K06989,K12867,K15235	map00760,map01100,map03040
TGME49_223900	[INTERPRO, BLASTED, MAPPED, ANNOTATED]	putative transmembrane protein	1096	20	0	88.82	1	C:GO:0016020	C:membrane			no IPS match	no IPS match	no IPS match	ENOG		0	Sarcocystidae		0
TGME49_223915	[INTERPRO, BLASTED]	hypothetical protein TGME49_223915	202	6	3.85292e-134	99.16						no IPS match	no IPS match	no IPS match
TGME49_223950	[INTERPRO, BLASTED, MAPPED, ANNOTATED]	hypothetical protein TGRH88_043740	916	20	0	83.3	3	F:GO:0008017; C:GO:0005634; C:GO:0005789	F:microtubule binding; C:nucleus; C:endoplasmic reticulum membrane			no IPS match	no IPS match	no IPS match	ENOG	DnaJ molecular chaperone homology domain	0	Sarcocystidae		0
TGME49_224010	[INTERPRO, BLASTED, MAPPED, ANNOTATED]	putative transmembrane protein	834	10	0	92.7	1	C:GO:0016020	C:membrane			no IPS match	no IPS match	no IPS match	ENOG		0	Sarcocystidae		0
TGME49_224020	[INTERPRO, BLASTED, MAPPED, ANNOTATED]	putative transmembrane protein	111	6	4.45025e-55	80.37	1	C:GO:0016020	C:membrane			no IPS match	no IPS match	no IPS match	ENOG		1.5e-58	Sarcocystidae		0
TGME49_224030	[INTERPRO, BLASTED]	adhesion regulating	1142	20	0	81.15						no IPS match	no IPS match	no IPS match	ENOG		0	Sarcocystidae		0
TGME49_224070	[INTERPRO, BLASTED, MAPPED]	hypothetical protein TGRH88_043870	1542	20	0	85.29	2	C:GO:0000178; C:GO:0005634	C:exosome (RNase complex); C:nucleus			IPR027267 (G3DSA:1.20.1270.GENE3D)	no GO terms	no GO terms	ENOG		0	Sarcocystidae		0
TGME49_224100	[INTERPRO, BLASTED]	hypothetical protein TGME49_224100	213	6	5.03034e-135	98.52						no IPS match	no IPS match	no IPS match
TGME49_224140	[INTERPRO, BLASTED]	hypothetical protein TGME49_224140	1097	15	0	94.15						no IPS match	no IPS match	no IPS match	ENOG		0	Sarcocystidae		0
TGME49_224210	[INTERPRO, BLASTED, MAPPED, ANNOTATED]	putative pseudouridylate synthase 1	1175	20	0	92.6	1	C:GO:0016020	C:membrane			IPR019448 (PROSITE_PROFILES)	no GO terms	no GO terms	ENOG		0	Sarcocystidae		0
TGME49_224275	[INTERPRO, BLASTED]	hypothetical protein TGME49_224275	153	7	4.3421e-109	98.76						no IPS match	no IPS match	no IPS match
TGME49_224320	[INTERPRO, BLASTED]	hypothetical protein TGME49_224320	2408	18	0	89.01						no IPS match	no IPS match	no IPS match	ENOG		0	Sarcocystidae		0
TGME49_224340	[INTERPRO, BLASTED, MAPPED, ANNOTATED]	putative transmembrane protein	266	20	5.87129e-86	79.26	1	C:GO:0016020	C:membrane			no IPS match	no IPS match	no IPS match	ENOG		4.7e-79	Sarcocystidae		0
TGME49_224470	[INTERPRO, BLASTED]	TPA: hypothetical protein BN1205_065150	743	14	0	92.95						no IPS match	no IPS match	no IPS match	ENOG		0	Sarcocystidae		0
TGME49_224510	[INTERPRO, BLASTED, MAPPED, ANNOTATED]	hypothetical protein TGME49_224510	2106	20	0	84.53	7	P:GO:0031991; P:GO:0032955; P:GO:0048024; F:GO:0003723; F:GO:0005085; C:GO:0005681; C:GO:0005737	P:regulation of actomyosin contractile ring contraction; P:regulation of division septum assembly; P:regulation of mRNA splicing, via spliceosome; F:RNA binding; F:guanyl-nucleotide exchange factor activity; C:spliceosomal complex; C:cytoplasm			PTHR13491 (PANTHER)	no GO terms	no GO terms	ENOG		0	Sarcocystidae		0
TGME49_224540	[INTERPRO, BLASTED]	putative proteophosphoglycan ppg4, related protein	4798	20	0	91.86						cd14686 (CDD); IPR027417 (SUPERFAMILY)	no GO terms	no GO terms	ENOG	response to salt stress	0	Sarcocystidae		0
TGME49_224560	[INTERPRO, BLASTED]	hypothetical protein TGME49_224560	105	4	1.6072e-69	98.81						no IPS match	no IPS match	no IPS match
TGME49_224570	[INTERPRO, BLASTED, MAPPED, ANNOTATED]	putative transmembrane protein	602	20	0	82.62	1	C:GO:0016020	C:membrane			IPR008537 (PFAM); IPR008537 (PANTHER)	no GO terms	no GO terms	COG,ENOG	Protein of unknown function (DUF819)	0	Sarcocystidae		0
TGME49_224575	[INTERPRO, BLASTED]	hypothetical protein TGME49_224575	92	11	1.59007e-60	99						no IPS match	no IPS match	no IPS match
TGME49_224620	[INTERPRO, BLASTED, MAPPED, ANNOTATED]	putative transmembrane protein	288	8	0	65.1	1	C:GO:0016020	C:membrane			no IPS match	no IPS match	no IPS match	ENOG		8.3e-162	Sarcocystidae		0
TGME49_224680	[INTERPRO, BLASTED, MAPPED]	hypothetical protein TGRH88_044340	1024	20	0	85.25	1	C:GO:0016020	C:membrane			IPR009030 (SUPERFAMILY)	no GO terms	no GO terms	ENOG		3.4e-274	Sarcocystidae		0
TGME49_224730	[INTERPRO, BLASTED, MAPPED]	hypothetical protein TGFOU_224730	339	20	4.2308e-105	85.31	7	P:GO:0006426; P:GO:0070150; F:GO:0004820; F:GO:0005524; F:GO:0016874; C:GO:0005737; C:GO:0005739	P:glycyl-tRNA aminoacylation; P:mitochondrial glycyl-tRNA aminoacylation; F:glycine-tRNA ligase activity; F:ATP binding; F:ligase activity; C:cytoplasm; C:mitochondrion			no IPS match	no IPS match	no IPS match	ENOG		1.3e-121	Sarcocystidae		0
TGME49_224740	[INTERPRO, BLASTED]	hypothetical protein TGME49_224740	424	20	0	86.44						IPR022226 (PFAM)	no GO terms	no GO terms	ENOG	Protein of unknown function (DUF3752)	5.3e-173	Sarcocystidae		0
TGME49_224800	[INTERPRO, BLASTED, MAPPED, ANNOTATED]	ER lumen protein retaining receptor	294	20	0	78.14	6	P:GO:0006621; P:GO:0006888; P:GO:0015031; F:GO:0046923; C:GO:0005789; C:GO:0005801	P:protein retention in ER lumen; P:endoplasmic reticulum to Golgi vesicle-mediated transport; P:protein transport; F:ER retention sequence binding; C:endoplasmic reticulum membrane; C:cis-Golgi network			IPR000133 (PFAM)	P:GO:0006621; F:GO:0046923; C:GO:0016020	P:protein retention in ER lumen; F:ER retention sequence binding; C:membrane	ENOG	ER lumen protein retaining receptor	1.4e-164	Sarcocystidae		0
TGME49_224810	[INTERPRO, BLASTED, MAPPED, ANNOTATED]	putative transmembrane protein	1786	19	0	94.55	1	C:GO:0016020	C:membrane			no IPS match	no IPS match	no IPS match	ENOG		0	Sarcocystidae		0
TGME49_224820	[INTERPRO, BLASTED]	TPA: hypothetical protein BN1205_065670	196	13	7.56918e-103	90.33						no IPS match	no IPS match	no IPS match	ENOG		1.6e-95	Sarcocystidae		0
TGME49_224830	[INTERPRO, BLASTED]	hypothetical protein TGME49_224830	1114	16	0	88.25						no IPS match	no IPS match	no IPS match	ENOG		0	Sarcocystidae		0
TGME49_224845	[INTERPRO, BLASTED]	hypothetical protein TGME49_224845	168	20	1.90672e-83	64.94						no IPS match	no IPS match	no IPS match
TGME49_224870	[INTERPRO, BLASTED]	hypothetical protein TGME49_224870	8645	20	0	97.47						IPR028107 (PFAM)	no GO terms	no GO terms	KOG,ENOG	Spatacsin C-terminus	0	Sarcocystidae		0
TGME49_224890	[INTERPRO, BLASTED, MAPPED, ANNOTATED]	AMP-binding enzyme	1075	20	0	77.34	22	P:GO:0000038; P:GO:0001676; P:GO:0044539; P:GO:0070328; F:GO:0004467; F:GO:0005324; F:GO:0031957; C:GO:0005777; C:GO:0005783; C:GO:0005811; C:GO:0005886	P:very long-chain fatty acid metabolic process; P:long-chain fatty acid metabolic process; P:long-chain fatty acid import into cell; P:triglyceride homeostasis; F:long-chain fatty acid-CoA ligase activity; F:long-chain fatty acid transmembrane transporter activity; F:very long-chain fatty acid-CoA ligase activity; C:peroxisome; C:endoplasmic reticulum; C:lipid droplet; C:plasma membrane	EC:6.2; EC:6.2.1.3; EC:6; EC:6.2.1	Forming carbon-sulfur bonds; long-chain-fatty-acid--CoA ligase; Ligases; Forming carbon-sulfur bonds	IPR042099 (G3DSA:3.40.50.GENE3D); IPR042099 (G3DSA:3.40.50.GENE3D); SSF56801 (SUPERFAMILY); SSF56801 (SUPERFAMILY)	no GO terms	no GO terms	KOG,ENOG	AMP-binding enzyme	0	Sarcocystidae		0
TGME49_224905	[INTERPRO, BLASTED]	hypothetical protein TGME49_224905	149	12	3.54865e-69	83.9						no IPS match	no IPS match	no IPS match	ENOG		0.026	Ciliophora		0
TGME49_224932	[INTERPRO, BLASTED, MAPPED, ANNOTATED]	putative jmjC domain protein	162	20	6.62895e-119	67.61	5	P:GO:0045905; F:GO:0016706; F:GO:0043565; C:GO:0005634; C:GO:0005737	P:positive regulation of translational termination; F:2-oxoglutarate-dependent dioxygenase activity; F:sequence-specific DNA binding; C:nucleus; C:cytoplasm	EC:1.14.11	Acting on paired donors, with incorporation or reduction of molecular oxygen. The oxygen incorporated need not be derived from O2	no IPS match	no IPS match	no IPS match	KOG,ENOG	Cupin-like domain	4.2e-94	Sarcocystidae		0
TGME49_224935	[INTERPRO, BLASTED, MAPPED, ANNOTATED]	putative transmembrane protein	1501	20	0	82.75	1	C:GO:0016020	C:membrane			no IPS match	no IPS match	no IPS match	ENOG		0	Sarcocystidae		0
TGME49_224940	[INTERPRO, BLASTED]	hypothetical protein TGME49_224940	847	20	0	95.62						G3DSA:3.40.50.11980 (GENE3D)	no GO terms	no GO terms	ENOG		0	Sarcocystidae		0
TGME49_224980	[INTERPRO, BLASTED]	hypothetical protein TGME49_224980	1114	18	0	93.32						no IPS match	no IPS match	no IPS match	ENOG		0	Sarcocystidae		0
TGME49_224990	[INTERPRO, BLASTED]	Choline transporter-like protein 5-A	154	18	1.93608e-88	69.82						no IPS match	no IPS match	no IPS match	ENOG		7.5e-77	Sarcocystidae		0
TGME49_225000	[INTERPRO, BLASTED, MAPPED, ANNOTATED]	enhancer of polycomb-like protein	1474	20	0	98	3	P:GO:0006357; C:GO:0032777; C:GO:0035267	P:regulation of transcription by RNA polymerase II; C:piccolo histone acetyltransferase complex; C:NuA4 histone acetyltransferase complex			no IPS match	no IPS match	no IPS match	ENOG		0	Sarcocystidae		0
TGME49_225005	[INTERPRO, BLASTED]	hypothetical protein TGME49_225005	142	9	1.59428e-62	98.9						no IPS match	no IPS match	no IPS match
TGME49_225010	[INTERPRO, BLASTED, MAPPED, ANNOTATED]	putative transmembrane protein	854	19	0	94.52	2	F:GO:0003729; C:GO:0016020	F:mRNA binding; C:membrane			IPR052109 (PANTHER)	no GO terms	no GO terms	ENOG		0	Sarcocystidae		0
TGME49_225070	[INTERPRO, BLASTED]	hypothetical protein TGME49_225070	456	10	0	93.53						PTHR47026 (PANTHER)	no GO terms	no GO terms	ENOG		2.5e-221	Sarcocystidae		0
TGME49_225105	[INTERPRO, BLASTED, MAPPED, ANNOTATED]	putative transmembrane protein	1022	17	0	87.59	1	C:GO:0016020	C:membrane			no IPS match	no IPS match	no IPS match	ENOG		0	Sarcocystidae		0
TGME49_225120	[INTERPRO, BLASTED]	TPA: rRNA processing protein, putative	214	11	1.91517e-132	93.57						no IPS match	no IPS match	no IPS match	ENOG		3.2e-118	Sarcocystidae		0
TGME49_225130	[INTERPRO, BLASTED]	hypothetical protein TGME49_225130	1383	15	0	89.52						no IPS match	no IPS match	no IPS match	ENOG		0	Sarcocystidae		0
TGME49_225150	[INTERPRO, BLASTED, MAPPED, ANNOTATED]	putative transmembrane protein	691	9	0	84.06	1	C:GO:0016020	C:membrane			no IPS match	no IPS match	no IPS match	ENOG		0	Sarcocystidae		0
TGME49_225160	[INTERPRO, BLASTED, MAPPED, ANNOTATED]	putative transmembrane protein	373	10	0	90.94	1	C:GO:0016020	C:membrane			no IPS match	no IPS match	no IPS match	ENOG		9.9e-200	Sarcocystidae		0
TGME49_225170	[INTERPRO, BLASTED, MAPPED, ANNOTATED]	putative transmembrane protein	127	5	5.8903e-86	86.98	1	C:GO:0016020	C:membrane			no IPS match	no IPS match	no IPS match	ENOG		2.5e-62	Sarcocystidae		0
TGME49_225190	[INTERPRO, BLASTED, MAPPED, ANNOTATED]	inositol-pentakisphosphate 2-kinase	1031	20	0	89.77	8	P:GO:0032958; F:GO:0005524; F:GO:0035299; C:GO:0005634	P:inositol phosphate biosynthetic process; F:ATP binding; F:inositol pentakisphosphate 2-kinase activity; C:nucleus	EC:2.7.1; EC:2.7; EC:2; EC:2.7.1.158	Transferring phosphorus-containing groups; Transferring phosphorus-containing groups; Transferases; inositol-pentakisphosphate 2-kinase	IPR009286 (PFAM); IPR043001 (G3DSA:3.30.200.GENE3D)	F:GO:0005524; F:GO:0035299	F:ATP binding; F:inositol pentakisphosphate 2-kinase activity	ENOG	Inositol-pentakisphosphate 2-kinase	0	Sarcocystidae		0
TGME49_225200	[INTERPRO, BLASTED]	putative trichohyalin	1641	20	0	97.83						no IPS match	no IPS match	no IPS match	ENOG		0	Apicomplexa		0
TGME49_225230	[INTERPRO, BLASTED]	hypothetical protein TGME49_225230	744	11	0	96.04						no IPS match	no IPS match	no IPS match	ENOG		0	Sarcocystidae		0
TGME49_225270	[INTERPRO, BLASTED]	hypothetical protein TGME49_225270	3243	15	0	89.7						no IPS match	no IPS match	no IPS match	ENOG		0	Sarcocystidae		0
TGME49_225280	[INTERPRO, BLASTED]	hypothetical protein TGME49_225280	2547	16	0	87.27						no IPS match	no IPS match	no IPS match	ENOG		0	Sarcocystidae		0
TGME49_225300	[INTERPRO, BLASTED]	TPA: moesin protein, putative	278	6	0	89.95						no IPS match	no IPS match	no IPS match	ENOG		1.3e-106	Sarcocystidae		0
TGME49_225315	[INTERPRO, BLASTED]	hypothetical protein TGME49_225315	316	13	0	60.7						no IPS match	no IPS match	no IPS match	ENOG		2e-164	Apicomplexa		0
TGME49_225320	[INTERPRO, BLASTED, MAPPED]	hypothetical protein TGME49_225320	504	20	0	64.63	1	C:GO:0016020	C:membrane			no IPS match	no IPS match	no IPS match	ENOG		5.7e-259	Sarcocystidae		0
TGME49_225330	[INTERPRO, BLASTED]	hypothetical protein TGME49_225330	669	20	0	82.66						no IPS match	no IPS match	no IPS match	ENOG		1.1e-206	Sarcocystidae		0
TGME49_225340	[INTERPRO, BLASTED, MAPPED]	nuclear mitotic apparatus protein 1	2041	20	0	86.33	4	F:GO:0003682; F:GO:0061630; C:GO:0000151; C:GO:0031519	F:chromatin binding; F:ubiquitin protein ligase activity; C:ubiquitin ligase complex; C:PcG protein complex			no IPS match	no IPS match	no IPS match	ENOG		0	Sarcocystidae		0
TGME49_225350	[INTERPRO, BLASTED, MAPPED, ANNOTATED]	putative transmembrane protein	399	11	0	93.93	1	C:GO:0016020	C:membrane			PS51257 (PROSITE_PROFILES)	no GO terms	no GO terms	ENOG		1.9e-212	Sarcocystidae		0
TGME49_225360	[INTERPRO, BLASTED, MAPPED, ANNOTATED]	hypothetical protein TGME49_225360	756	20	0	74.33	3	P:GO:0042273; C:GO:0005730; C:GO:0030687	P:ribosomal large subunit biogenesis; C:nucleolus; C:preribosome, large subunit precursor			IPR015943 (G3DSA:2.130.10.GENE3D); IPR037379 (PANTHER); IPR036322 (SUPERFAMILY)	P:GO:0042273; F:GO:0005515; C:GO:0005730; C:GO:0030687	P:ribosomal large subunit biogenesis; F:protein binding; C:nucleolus; C:preribosome, large subunit precursor	ENOG		0	Sarcocystidae		0
TGME49_225370	[INTERPRO, BLASTED]	hypothetical protein TGCOUG_225370	866	11	0	99.92						no IPS match	no IPS match	no IPS match	ENOG		0	Sarcocystidae		0
TGME49_225380	[INTERPRO, BLASTED, MAPPED, ANNOTATED]	Ubiquitin receptor RAD23b	447	20	0	73.52	1	F:GO:0005488	F:binding			no IPS match	no IPS match	no IPS match	ENOG		4.6e-220	Sarcocystidae		0
TGME49_225400	[INTERPRO, BLASTED]	hypothetical protein TGMAS_225400	956	13	0	91.94						no IPS match	no IPS match	no IPS match	ENOG		0	Sarcocystidae		0
TGME49_225435	[INTERPRO, BLASTED]	hypothetical protein TGME49_225435	117	7	1.06925e-80	97.34						no IPS match	no IPS match	no IPS match
TGME49_225440	[INTERPRO, BLASTED]	hypothetical protein TGME49_225440	1746	15	0	91.86						no IPS match	no IPS match	no IPS match	ENOG		0	Sarcocystidae		0
TGME49_225460	[INTERPRO, BLASTED]	TPA: hypothetical protein BN1205_066530	188	10	5.22345e-108	94.01						no IPS match	no IPS match	no IPS match	ENOG		1.7e-75	Sarcocystidae		0
TGME49_225480	[INTERPRO, BLASTED]	hypothetical protein TGME49_225480	836	20	0	79.55						no IPS match	no IPS match	no IPS match	ENOG		0	Sarcocystidae		0
TGME49_225540	[INTERPRO, BLASTED]	hypothetical protein TGME49_225540	501	15	0	90.99						SSF69349 (SUPERFAMILY)	no GO terms	no GO terms	KOG,ENOG	RNA binding	6e-176	Sarcocystidae		0
TGME49_225555	[INTERPRO, BLASTED, MAPPED, ANNOTATED]	putative transmembrane protein	67	5	7.64396e-41	89.97	1	C:GO:0016020	C:membrane			no IPS match	no IPS match	no IPS match
TGME49_225570	[INTERPRO, BLASTED, MAPPED, ANNOTATED]	putative myosin heavy chain	717	20	0	72.77	11	P:GO:0006936; P:GO:0045162; P:GO:0045214; P:GO:0060271; P:GO:1902404; F:GO:0000146; F:GO:0051015; C:GO:0005814; C:GO:0016460; C:GO:0032982; C:GO:0110085	P:muscle contraction; P:clustering of voltage-gated sodium channels; P:sarcomere organization; P:cilium assembly; P:mitotic actomyosin contractile ring contraction; F:microfilament motor activity; F:actin filament binding; C:centriole; C:myosin II complex; C:myosin filament; C:mitotic actomyosin contractile ring	EC:5.6.1.8	myosin ATPase	PTHR23159 (PANTHER)	no GO terms	no GO terms	ENOG		6.9e-242	Sarcocystidae		0
TGME49_225590	[INTERPRO, BLASTED, MAPPED]	kinesin motor domain protein	1009	20	0	73.1	12	P:GO:0007018; P:GO:0007052; P:GO:0051231; F:GO:0003774; F:GO:0003777; F:GO:0005524; F:GO:0008017; C:GO:0005737; C:GO:0005856; C:GO:0005874; C:GO:0005875; C:GO:0016020	P:microtubule-based movement; P:mitotic spindle organization; P:spindle elongation; F:cytoskeletal motor activity; F:microtubule motor activity; F:ATP binding; F:microtubule binding; C:cytoplasm; C:cytoskeleton; C:microtubule; C:microtubule associated complex; C:membrane			IPR001752 (PFAM); IPR036961 (G3DSA:3.40.850.GENE3D); IPR027417 (SUPERFAMILY)	P:GO:0007018; F:GO:0003777; F:GO:0005524; F:GO:0008017	P:microtubule-based movement; F:microtubule motor activity; F:ATP binding; F:microtubule binding	ENOG		7.2e-120	Sarcocystidae		0
TGME49_225680	[INTERPRO, BLASTED]	hypothetical protein TGME49_225680	253	5	0	96.99						no IPS match	no IPS match	no IPS match
TGME49_225720	[INTERPRO, BLASTED]	hypothetical protein TGRUB_225720	300	20	1.83836e-115	89.86						no IPS match	no IPS match	no IPS match	ENOG		6e-147	Sarcocystidae		0
TGME49_225745	[INTERPRO, BLASTED]	amine-terminal region of chorein, A TM vesicle-mediated sorter	12206	20	0	90.64						IPR026854 (PFAM)	no GO terms	no GO terms	ENOG		0	Sarcocystidae		0
TGME49_225780	[INTERPRO, BLASTED, MAPPED, ANNOTATED]	putative transmembrane protein	474	20	0	78.78	1	C:GO:0016020	C:membrane			no IPS match	no IPS match	no IPS match	ENOG		5.7e-269	Sarcocystidae		0
TGME49_225820	[INTERPRO, BLASTED, MAPPED, ANNOTATED]	putative transmembrane protein	510	12	0	84.62	1	C:GO:0016020	C:membrane			no IPS match	no IPS match	no IPS match	ENOG		2.8e-237	Sarcocystidae		0
TGME49_225830	[INTERPRO, BLASTED, MAPPED, ANNOTATED]	TPA: hypothetical protein BN1205_066815	989	20	0	93.26	12	P:GO:0000226; P:GO:0001732; P:GO:0002188; P:GO:0006334; F:GO:0003729; F:GO:0003743; C:GO:0005634; C:GO:0015630; C:GO:0033186; C:GO:0043614; C:GO:0071540; C:GO:0071541	P:microtubule cytoskeleton organization; P:formation of cytoplasmic translation initiation complex; P:translation reinitiation; P:nucleosome assembly; F:mRNA binding; F:translation initiation factor activity; C:nucleus; C:microtubule cytoskeleton; C:CAF-1 complex; C:multi-eIF complex; C:eukaryotic translation initiation factor 3 complex, eIF3e; C:eukaryotic translation initiation factor 3 complex…			IPR051483 (PANTHER)	P:GO:0000226; C:GO:0015630	P:microtubule cytoskeleton organization; C:microtubule cytoskeleton	ENOG	response to salt stress	0	Sarcocystidae		0
TGME49_225840	[INTERPRO, BLASTED, MAPPED]	multi-pass transmembrane protein	686	12	0	94.28	1	C:GO:0016020	C:membrane			no IPS match	no IPS match	no IPS match	ENOG		6.3e-301	Sarcocystidae		0
TGME49_225860	[INTERPRO, BLASTED, MAPPED, ANNOTATED]	putative clumping factor B	1057	20	0	98.66	2	P:GO:0006357; C:GO:0005634	P:regulation of transcription by RNA polymerase II; C:nucleus			no IPS match	no IPS match	no IPS match	ENOG		2e-261	Sarcocystidae		0
TGME49_225870	[INTERPRO, BLASTED]	hypothetical protein TGME49_225870	1579	13	0	88.94						no IPS match	no IPS match	no IPS match	ENOG		0	Sarcocystidae		0
TGME49_225900	[INTERPRO, BLASTED]	putative F-box protein	1461	12	0	92.6						no IPS match	no IPS match	no IPS match	ENOG		0	Sarcocystidae		0
TGME49_225910	[INTERPRO, BLASTED]	putative collagen alpha-1(II) chain	1259	16	0	84.21						no IPS match	no IPS match	no IPS match	ENOG		0	Sarcocystidae		0
TGME49_225920	[INTERPRO, BLASTED]	hypothetical protein TGARI_225920	946	20	0	89.47						no IPS match	no IPS match	no IPS match	ENOG		0	Sarcocystidae		0
TGME49_225953	[INTERPRO, BLASTED]	hypothetical protein TGME49_225953	146	7	8.60386e-95	80.35						no IPS match	no IPS match	no IPS match
TGME49_225958	[INTERPRO, BLASTED]	hypothetical protein TGME49_225958	139	3	4.6145e-96	97.67						no IPS match	no IPS match	no IPS match
TGME49_225980	[INTERPRO, BLASTED]	hypothetical protein TGME49_225980	1842	20	0	97.83						no IPS match	no IPS match	no IPS match	ENOG		0	Sarcocystidae		0
TGME49_226050	[INTERPRO, BLASTED, MAPPED, ANNOTATED]	ibr domain protein	774	20	0	80.74	14	P:GO:0000209; P:GO:0032436; F:GO:0008270; F:GO:0031624; F:GO:0061630; C:GO:0000151; C:GO:0005737	P:protein polyubiquitination; P:positive regulation of proteasomal ubiquitin-dependent protein catabolic process; F:zinc ion binding; F:ubiquitin conjugating enzyme binding; F:ubiquitin protein ligase activity; C:ubiquitin ligase complex; C:cytoplasm	EC:2.3; EC:2; EC:2.3.2	Acyltransferases; Transferases; Acyltransferases	IPR002867 (PFAM); G3DSA:1.20.120.1750 (GENE3D); IPR031127 (PANTHER); IPR044066 (PROSITE_PROFILES); cd22584 (CDD); cd20335 (CDD); SSF57850 (SUPERFAMILY)	P:GO:0000209; P:GO:0006511; P:GO:0016567; P:GO:0032436; F:GO:0004842; F:GO:0008270; F:GO:0031624; F:GO:0061630; C:GO:0000151; C:GO:0005737	P:protein polyubiquitination; P:ubiquitin-dependent protein catabolic process; P:protein ubiquitination; P:positive regulation of proteasomal ubiquitin-dependent protein catabolic process; F:ubiquitin-protein transferase activity; F:zinc ion binding; F:ubiquitin conjugating enzyme binding; F:ubiquitin protein ligase activity; C:ubiquitin ligase complex; C:cytoplasm	ENOG	IBR domain, a half RING-finger domain	0	Sarcocystidae		0
TGME49_226230	[INTERPRO, BLASTED, MAPPED, ANNOTATED]	hypothetical protein TGME49_226230	388	20	0	71.14	1	C:GO:0016020	C:membrane			no IPS match	no IPS match	no IPS match	ENOG		1.8e-228	Sarcocystidae		0
TGME49_226245	[INTERPRO, BLASTED]	hypothetical protein TGME49_226245	876	14	0	79.57						no IPS match	no IPS match	no IPS match
TGME49_226260	[INTERPRO, BLASTED]	hypothetical protein TGME49_226260	238	6	1.78814e-173	93.33						no IPS match	no IPS match	no IPS match	ENOG		1.8e-130	Sarcocystidae		0
TGME49_226290	[INTERPRO, BLASTED]	hypothetical protein TGME49_226290	333	10	0	90.68						no IPS match	no IPS match	no IPS match	ENOG		4.6e-180	Sarcocystidae		0
TGME49_226330	[INTERPRO, BLASTED, MAPPED, ANNOTATED]	putative transmembrane protein	900	13	0	91.82	1	C:GO:0016020	C:membrane			no IPS match	no IPS match	no IPS match
TGME49_226340	[INTERPRO, BLASTED]	Chromosome condensation regulator protein, related	1163	20	0	92.78						IPR011993 (G3DSA:2.30.29.GENE3D); SSF50729 (SUPERFAMILY)	no GO terms	no GO terms	COG,ENOG	Pleckstrin homology domain.	0	Sarcocystidae		0
TGME49_226350	[INTERPRO, BLASTED, MAPPED, ANNOTATED]	AF4/FMR2 family member 4	1633	20	0	84.67	1	P:GO:0071027	P:nuclear RNA surveillance			no IPS match	no IPS match	no IPS match	ENOG		0	Sarcocystidae		0
TGME49_226390	[INTERPRO, BLASTED, MAPPED, ANNOTATED]	PST-A-like protein	999	20	0	74.65	6	P:GO:0006639; F:GO:0047372; C:GO:0016020	P:acylglycerol metabolic process; F:acylglycerol lipase activity; C:membrane	EC:3.1; EC:3.1.1.23; EC:3; EC:3.1.1	Acting on ester bonds; acylglycerol lipase; Hydrolases; Acting on ester bonds	IPR022742 (PFAM); IPR029058 (G3DSA:3.40.50.GENE3D); IPR051044 (PANTHER); IPR029058 (SUPERFAMILY)	F:GO:0016298; C:GO:0016020	F:lipase activity; C:membrane	ENOG	Serine aminopeptidase, S33	0	Sarcocystidae		0
TGME49_226450	[INTERPRO, BLASTED, MAPPED, ANNOTATED]	putative transmembrane protein	513	8	0	88.76	1	C:GO:0016020	C:membrane			no IPS match	no IPS match	no IPS match	ENOG		3.9e-279	Sarcocystidae		0
TGME49_226460	[INTERPRO, BLASTED, MAPPED, ANNOTATED]	putative transmembrane protein	571	14	0	88.76	1	C:GO:0016020	C:membrane			no IPS match	no IPS match	no IPS match	ENOG		5.7e-223	Sarcocystidae		0
TGME49_226470	[INTERPRO, BLASTED, MAPPED]	hypothetical protein TGME49_226470	3204	20	0	81.85	5	P:GO:0016192; F:GO:0005085; F:GO:0031267; C:GO:0005829; C:GO:0030139	P:vesicle-mediated transport; F:guanyl-nucleotide exchange factor activity; F:small GTPase binding; C:cytosol; C:endocytic vesicle			IPR029058 (G3DSA:3.40.50.GENE3D); IPR029058 (SUPERFAMILY); IPR029058 (SUPERFAMILY)	no GO terms	no GO terms	ENOG		0	Sarcocystidae		0
TGME49_226490	[INTERPRO, BLASTED]	hypothetical protein TGME49_226490	168	11	4.27237e-122	93.7						no IPS match	no IPS match	no IPS match	ENOG		5.3e-92	Sarcocystidae		0
TGME49_226515	[INTERPRO, BLASTED]	hypothetical protein TGME49_226515	507	6	0	99.85						no IPS match	no IPS match	no IPS match
TGME49_226532	[INTERPRO, BLASTED, MAPPED, ANNOTATED]	putative transmembrane protein	344	8	0	92.24	1	C:GO:0016020	C:membrane			no IPS match	no IPS match	no IPS match	ENOG		1.2e-180	Sarcocystidae		0
TGME49_226565	[INTERPRO, BLASTED]	hypothetical protein TGME49_226565	130	3	7.35572e-91	99.49						no IPS match	no IPS match	no IPS match
TGME49_226570	[INTERPRO, BLASTED]	hypothetical protein TGME49_226570	139	4	6.90899e-97	83.07						no IPS match	no IPS match	no IPS match	ENOG		3e-77	Sarcocystidae		0
TGME49_226580	[INTERPRO, BLASTED, MAPPED, ANNOTATED]	putative transmembrane protein	380	20	0	77.03	1	C:GO:0016020	C:membrane			no IPS match	no IPS match	no IPS match	ENOG		4.8e-218	Sarcocystidae		0
TGME49_226620	[INTERPRO, BLASTED, MAPPED]	hypothetical protein TGME49_226620	3744	15	0	85.8	1	C:GO:0016020	C:membrane			no IPS match	no IPS match	no IPS match	ENOG		0	Sarcocystidae		0
TGME49_226670	[INTERPRO, BLASTED]	hypothetical protein TGME49_226670	494	11	0	91						no IPS match	no IPS match	no IPS match	ENOG		4.1e-270	Sarcocystidae		0
TGME49_226680	[INTERPRO, BLASTED]	hypothetical protein TGDOM2_226680	899	14	0	90.17						no IPS match	no IPS match	no IPS match	ENOG		0	Sarcocystidae		0
TGME49_226690	[INTERPRO, BLASTED, MAPPED, ANNOTATED]	putative transmembrane protein	1011	20	0	94.85	1	C:GO:0016020	C:membrane			no IPS match	no IPS match	no IPS match	ENOG		0	Sarcocystidae		0
TGME49_226705	[INTERPRO, BLASTED, MAPPED, ANNOTATED]	putative transmembrane protein	106	8	2.64642e-51	89.52	1	C:GO:0016020	C:membrane			no IPS match	no IPS match	no IPS match	ENOG		1.2e-38	Sarcocystidae		0
TGME49_226710	[INTERPRO, BLASTED, MAPPED, ANNOTATED]	putative transmembrane protein	297	20	0	62.39	1	C:GO:0005886	C:plasma membrane			IPR021910 (PFAM); PTHR36561 (PANTHER)	C:GO:0016020	C:membrane	ENOG	Protein of unknown function (DUF3522)	7.2e-169	Sarcocystidae		0
TGME49_226820	[INTERPRO, BLASTED]	hypothetical protein TGME49_226820	157	7	4.24837e-113	98.45						no IPS match	no IPS match	no IPS match
TGME49_226900	[INTERPRO, BLASTED, MAPPED]	SSXT (amine-terminal region) protein	826	20	0	84.26	1	C:GO:0005886	C:plasma membrane			no IPS match	no IPS match	no IPS match	ENOG		0	Sarcocystidae		0
TGME49_226920	[INTERPRO, BLASTED, MAPPED, ANNOTATED]	trypsin-like peptidase domain protein	988	20	0	87.75	18	P:GO:0010880; P:GO:0016485; P:GO:0031998; P:GO:0060047; F:GO:0004252; F:GO:0005102; C:GO:0005777; C:GO:0005886; C:GO:0014701	P:regulation of release of sequestered calcium ion into cytosol by sarcoplasmic reticulum; P:protein processing; P:regulation of fatty acid beta-oxidation; P:heart contraction; F:serine-type endopeptidase activity; F:signaling receptor binding; C:peroxisome; C:plasma membrane; C:junctional sarcoplasmic reticulum membrane	EC:3.4.21; EC:3.4; EC:3	Acting on peptide bonds (peptidases); Acting on peptide bonds (peptidases); Hydrolases	IPR043504 (G3DSA:2.40.10.GENE3D); PF13365 (PFAM); IPR043504 (G3DSA:2.40.10.GENE3D); IPR039245 (PANTHER); IPR009003 (SUPERFAMILY)	P:GO:0016485; F:GO:0004252; C:GO:0005777	P:protein processing; F:serine-type endopeptidase activity; C:peroxisome	ENOG		0	Sarcocystidae		0
TGME49_226925	[INTERPRO, BLASTED]	hypothetical protein TGME49_226925	158	8	6.83648e-111	99.02						no IPS match	no IPS match	no IPS match
TGME49_226930	[INTERPRO, BLASTED]	hypothetical protein TGME49_226930	157	5	1.28256e-86	99.1						no IPS match	no IPS match	no IPS match	ENOG		4.3e-64	Sarcocystidae		0
TGME49_226980	[INTERPRO, BLASTED, MAPPED, ANNOTATED]	translation initiation factor eIF3 subunit	227	20	2.386e-90	74.08	3	P:GO:0006413; F:GO:0003743; C:GO:0005852	P:translational initiation; F:translation initiation factor activity; C:eukaryotic translation initiation factor 3 complex			IPR013906 (PFAM); IPR023194 (G3DSA:1.10.246.GENE3D); IPR013906 (PANTHER)	F:GO:0003743; C:GO:0005737; C:GO:0005852	F:translation initiation factor activity; C:cytoplasm; C:eukaryotic translation initiation factor 3 complex	ENOG	Eukaryotic translation initiation factor 3 subunit J	9e-103	Sarcocystidae		0
TGME49_226985	[INTERPRO, BLASTED, MAPPED]	hypothetical protein BESB_059610	621	2	2.10322e-72	59.86	1	C:GO:0016020	C:membrane			no IPS match	no IPS match	no IPS match
TGME49_226990	[INTERPRO, BLASTED]	hypothetical protein TGME49_226990	676	9	0	90.5						no IPS match	no IPS match	no IPS match	ENOG		3.7e-277	Sarcocystidae		0
TGME49_227000	[INTERPRO, BLASTED]	hypothetical protein TGME49_227000	1082	20	0	78.12						no IPS match	no IPS match	no IPS match	ENOG		0	Sarcocystidae		0
TGME49_227040	[INTERPRO, BLASTED]	hypothetical protein TGME49_227040	242	5	1.21144e-161	99.73						no IPS match	no IPS match	no IPS match
TGME49_227060	[INTERPRO, BLASTED, MAPPED, ANNOTATED]	putative transmembrane protein	1273	20	0	96.25	1	C:GO:0016020	C:membrane			no IPS match	no IPS match	no IPS match	ENOG		0	Sarcocystidae		0
TGME49_227070	[INTERPRO, BLASTED]	hypothetical protein TGME49_227070	300	8	0	93.67						no IPS match	no IPS match	no IPS match	ENOG		1.9e-132	Sarcocystidae		0
TGME49_227115	[INTERPRO, BLASTED, MAPPED, ANNOTATED]	putative transmembrane protein	859	20	0	75.37	1	C:GO:0016020	C:membrane			no IPS match	no IPS match	no IPS match	ENOG		0	Sarcocystidae		0
TGME49_227130	[INTERPRO, BLASTED, MAPPED, ANNOTATED]	putative transmembrane protein	188	3	1.0766e-132	99.47	1	C:GO:0016020	C:membrane			no IPS match	no IPS match	no IPS match
TGME49_227270	[INTERPRO, BLASTED, MAPPED, ANNOTATED]	mitotic checkpoint prcc-carboxy-term protein	551	16	0	83.69	1	C:GO:0005634	C:nucleus			IPR018800 (PFAM); IPR018800 (PANTHER)	C:GO:0005634	C:nucleus	ENOG	Mitotic checkpoint regulator, MAD2B-interacting	2.9e-240	Sarcocystidae		0
TGME49_227300	[INTERPRO, BLASTED]	hypothetical protein TGME49_227300	2457	12	0	90.51						IPR051352 (PANTHER)	no GO terms	no GO terms	ENOG		0	Sarcocystidae		0
TGME49_227310	[INTERPRO, BLASTED]	hypothetical protein TGME49_227310	181	6	7.62896e-94	86.26						no IPS match	no IPS match	no IPS match	ENOG		2.2e-75	Sarcocystidae		0
TGME49_227320	[INTERPRO, BLASTED, MAPPED, ANNOTATED]	coiled-coil domain-containing protein 61	1231	20	0	84.66	3	C:GO:0005737; C:GO:0005856; C:GO:0042995	C:cytoplasm; C:cytoskeleton; C:cell projection			no IPS match	no IPS match	no IPS match	ENOG		0	Sarcocystidae		0
TGME49_227330	[INTERPRO, BLASTED, MAPPED, ANNOTATED]	putative transmembrane protein	156	6	1.72674e-88	94.41	1	C:GO:0016020	C:membrane			no IPS match	no IPS match	no IPS match	ENOG		7.1e-83	Sarcocystidae		0
TGME49_227335	[INTERPRO, BLASTED]	hypothetical protein TGME49_227335	120	1	7.74191e-67	100						no IPS match	no IPS match	no IPS match
TGME49_227350	[INTERPRO, BLASTED, MAPPED, ANNOTATED]	patched family protein	2489	20	0	85.5	4	P:GO:0006897; P:GO:0018996; C:GO:0005886; C:GO:0030659	P:endocytosis; P:molting cycle, collagen and cuticulin-based cuticle; C:plasma membrane; C:cytoplasmic vesicle membrane			G3DSA:1.20.1640.10 (GENE3D); IPR003392 (PFAM); IPR053958 (PFAM); IPR051697 (PANTHER); IPR000731 (PROSITE_PROFILES); SSF82866 (SUPERFAMILY)	C:GO:0016020	C:membrane	KOG,ENOG	Sterol-sensing domain of SREBP cleavage-activation	0	Sarcocystidae		0
TGME49_227380	[INTERPRO, BLASTED, MAPPED, ANNOTATED]	putative transmembrane protein	631	20	0	58.88	1	C:GO:0016020	C:membrane			no IPS match	no IPS match	no IPS match	ENOG		0	Sarcocystidae		0
TGME49_227400	[INTERPRO, BLASTED, MAPPED, ANNOTATED]	methyltransferase TYW3	793	20	0	88.14	6	P:GO:0030488; P:GO:0031591; F:GO:0008175	P:tRNA methylation; P:wybutosine biosynthetic process; F:tRNA methyltransferase activity	EC:2.1; EC:2; EC:2.1.1	Transferring one-carbon groups; Transferases; Transferring one-carbon groups	IPR036602 (G3DSA:3.30.1960.GENE3D); IPR036602 (G3DSA:3.30.1960.GENE3D); IPR003827 (PFAM); IPR051039 (PANTHER); IPR036602 (SUPERFAMILY)	no GO terms	no GO terms	ENOG	Methyltransferase TYW3	3.2e-264	Sarcocystidae		0
TGME49_227410	[INTERPRO, BLASTED, MAPPED, ANNOTATED]	putative transmembrane protein	1109	12	0	87.77	1	C:GO:0016020	C:membrane			no IPS match	no IPS match	no IPS match	ENOG		0	Sarcocystidae		0
TGME49_227590	[INTERPRO, BLASTED, MAPPED]	putative transmembrane protein	186	7	5.82608e-96	78.65	1	C:GO:0016020	C:membrane			no IPS match	no IPS match	no IPS match	ENOG		3e-88	Sarcocystidae		0
TGME49_227610	[INTERPRO, BLASTED, MAPPED, ANNOTATED]	trafficking particle complex subunit 10	3648	20	0	88.7	4	P:GO:0006891; P:GO:0034498; C:GO:0005829; C:GO:1990071	P:intra-Golgi vesicle-mediated transport; P:early endosome to Golgi transport; C:cytosol; C:TRAPPII protein complex			IPR045126 (PANTHER)	P:GO:0006891; P:GO:0034498; P:GO:0048193; C:GO:1990071	P:intra-Golgi vesicle-mediated transport; P:early endosome to Golgi transport; P:Golgi vesicle transport; C:TRAPPII protein complex	KOG,ENOG	early endosome to Golgi transport	0	Sarcocystidae		0
TGME49_227615	[INTERPRO, BLASTED]	hypothetical protein TGME49_227615	123	3	2.83759e-87	99.46						no IPS match	no IPS match	no IPS match
TGME49_227630	[INTERPRO, BLASTED]	hypothetical protein TGME49_227630	100	4	2.17858e-65	98.16						no IPS match	no IPS match	no IPS match	ENOG		0.00032	Sarcocystidae		0
TGME49_227820	[INTERPRO, BLASTED, MAPPED, ANNOTATED]	TPA: unspecified product	2018	14	0	91.63	5	P:GO:0032456; P:GO:0042147; F:GO:0000149; C:GO:0005829; C:GO:1990745	P:endocytic recycling; P:retrograde transport, endosome to Golgi; F:SNARE binding; C:cytosol; C:EARP complex			IPR040047 (PANTHER)	P:GO:0032456; P:GO:0042147; F:GO:0000149; C:GO:1990745	P:endocytic recycling; P:retrograde transport, endosome to Golgi; F:SNARE binding; C:EARP complex	ENOG		0	Sarcocystidae		0
TGME49_227860	[INTERPRO, BLASTED]	hypothetical protein TGARI_227860	377	20	0	77.87						no IPS match	no IPS match	no IPS match	ENOG		5.2e-164	Sarcocystidae		0
TGME49_227880	[INTERPRO, BLASTED, MAPPED]	TPA: hypothetical protein BN1205_068685	770	16	0	82.9	12	P:GO:0030833; P:GO:0045773; P:GO:0048812; P:GO:0061003; P:GO:0098974; F:GO:0051015; C:GO:0005884; C:GO:0016020; C:GO:0030027; C:GO:0030425; C:GO:0030427; C:GO:0030864	P:regulation of actin filament polymerization; P:positive regulation of axon extension; P:neuron projection morphogenesis; P:positive regulation of dendritic spine morphogenesis; P:postsynaptic actin cytoskeleton organization; F:actin filament binding; C:actin filament; C:membrane; C:lamellipodium; C:dendrite; C:site of polarized growth; C:cortical actin cytoskeleton			IPR014710 (G3DSA:2.60.120.GENE3D); IPR011051 (SUPERFAMILY)	no GO terms	no GO terms	ENOG		0	Sarcocystidae		0
TGME49_227890	[INTERPRO, BLASTED]	hypothetical protein TGME49_227890	262	20	1.18227e-114	76.76						no IPS match	no IPS match	no IPS match	ENOG		1.9e-112	Sarcocystidae		0
TGME49_227930	[INTERPRO, BLASTED]	putative transmembrane protein	1553	14	0	93.6						no IPS match	no IPS match	no IPS match	ENOG		0	Sarcocystidae		0
TGME49_227940	[INTERPRO, BLASTED, MAPPED, ANNOTATED]	putative transmembrane protein	209	6	9.27235e-118	97.19	1	C:GO:0016020	C:membrane			no IPS match	no IPS match	no IPS match
TGME49_227980	[INTERPRO, BLASTED]	hypothetical protein TGME49_227980	802	11	0	92.38						no IPS match	no IPS match	no IPS match	ENOG		0	Sarcocystidae		0
TGME49_227990	[INTERPRO, BLASTED, MAPPED, ANNOTATED]	putative ATP-dependent Clp protease proteolytic subunit,related protein	1053	20	0	85.18	6	P:GO:0006508; F:GO:0003729; F:GO:0008233	P:proteolysis; F:mRNA binding; F:peptidase activity	EC:3.4; EC:3	Acting on peptide bonds (peptidases); Hydrolases	no IPS match	no IPS match	no IPS match	ENOG		0	Sarcocystidae		0
TGME49_228010	[INTERPRO, BLASTED, MAPPED, ANNOTATED]	structure/function maintentance protein	484	20	1.22364e-171	89.34	3	F:GO:0003729; C:GO:0008180; C:GO:0016020	F:mRNA binding; C:COP9 signalosome; C:membrane			G3DSA:3.40.140.10 (GENE3D); IPR024969 (PFAM); PTHR10540 (PANTHER)	C:GO:0008180	C:COP9 signalosome	ENOG		2.1e-197	Sarcocystidae		0
TGME49_228020	[INTERPRO, BLASTED]	hypothetical protein TGME49_228020	288	6	1.51906e-168	99.26						no IPS match	no IPS match	no IPS match
TGME49_228030	[INTERPRO, BLASTED, MAPPED, ANNOTATED]	putative transmembrane protein	1136	15	0	90.77	4	P:GO:0055085; F:GO:0015297; C:GO:0005794; C:GO:0016020	P:transmembrane transport; F:antiporter activity; C:Golgi apparatus; C:membrane			no IPS match	no IPS match	no IPS match	ENOG		0	Sarcocystidae		0
TGME49_228050	[INTERPRO, BLASTED, MAPPED, ANNOTATED]	putative transmembrane protein	555	8	0	95.69	1	C:GO:0016020	C:membrane			no IPS match	no IPS match	no IPS match	ENOG		4.2e-279	Sarcocystidae		0
TGME49_228060	[INTERPRO, BLASTED]	hypothetical protein TGME49_228060	1128	14	0	87.89						no IPS match	no IPS match	no IPS match	ENOG		0	Sarcocystidae		0
TGME49_228065	[INTERPRO, BLASTED]	putative transmembrane protein	88	5	8.93614e-58	97.95						no IPS match	no IPS match	no IPS match
TGME49_228100	[INTERPRO, BLASTED, MAPPED, ANNOTATED]	putative transmembrane protein	1314	20	0	90.9	6	P:GO:0000462; F:GO:0003723; C:GO:0016020; C:GO:0030686; C:GO:0032040; C:GO:0034455	P:maturation of SSU-rRNA from tricistronic rRNA transcript (SSU-rRNA, 5.8S rRNA, LSU-rRNA); F:RNA binding; C:membrane; C:90S preribosome; C:small-subunit processome; C:t-UTP complex			IPR015943 (G3DSA:2.130.10.GENE3D); IPR015943 (G3DSA:2.130.10.GENE3D); IPR036322 (SUPERFAMILY); IPR036322 (SUPERFAMILY)	F:GO:0005515	F:protein binding	KOG,ENOG	WD40 repeats	0	Sarcocystidae		0
TGME49_228120	[INTERPRO, BLASTED, MAPPED, ANNOTATED]	chloroquine resistance marker	3945	20	0	92.13	10	P:GO:0042073; P:GO:0060271; P:GO:0070507; P:GO:0071027; F:GO:0008017; C:GO:0005634; C:GO:0005813; C:GO:0005930; C:GO:0030992; C:GO:0036064	P:intraciliary transport; P:cilium assembly; P:regulation of microtubule cytoskeleton organization; P:nuclear RNA surveillance; F:microtubule binding; C:nucleus; C:centrosome; C:axoneme; C:intraciliary transport particle B; C:ciliary basal body			IPR022702 (PFAM); IPR018799 (PANTHER)	P:GO:0042073; P:GO:0060271; P:GO:0070507; F:GO:0008017; C:GO:0005813; C:GO:0005930; C:GO:0030992; C:GO:0036064	P:intraciliary transport; P:cilium assembly; P:regulation of microtubule cytoskeleton organization; F:microtubule binding; C:centrosome; C:axoneme; C:intraciliary transport particle B; C:ciliary basal body	KOG,ENOG	Auxin response factor	0	Sarcocystidae		0
TGME49_228145	[INTERPRO, BLASTED]	hypothetical protein TGME49_228145	70	5	5.03155e-38	98.21						no IPS match	no IPS match	no IPS match
TGME49_228150	[INTERPRO, BLASTED]	hypothetical protein TGME49_228150	2115	14	0	91.38						no IPS match	no IPS match	no IPS match	ENOG		0	Sarcocystidae		0
TGME49_228175	[INTERPRO, BLASTED, MAPPED]	hypothetical protein TGME49_228175	989	12	0	86.97	1	C:GO:0016020	C:membrane			no IPS match	no IPS match	no IPS match
TGME49_228230	[INTERPRO, BLASTED, MAPPED]	hypothetical protein TGME49_228230	1256	14	0	92	6	P:GO:0036158; P:GO:0036159; P:GO:0044458; F:GO:0046872; C:GO:0005737; C:GO:0034451	P:outer dynein arm assembly; P:inner dynein arm assembly; P:motile cilium assembly; F:metal ion binding; C:cytoplasm; C:centriolar satellite			no IPS match	no IPS match	no IPS match	ENOG		0	Sarcocystidae		0
TGME49_228240	[INTERPRO, BLASTED, MAPPED]	TPA: Proteophosphoglycan ppg1, related	1458	20	0	88.11	1	C:GO:0016020	C:membrane			no IPS match	no IPS match	no IPS match	ENOG		0	Sarcocystidae		0
TGME49_228270	[INTERPRO, BLASTED, MAPPED, ANNOTATED]	putative transmembrane protein	618	14	8.80904e-179	92.63	1	C:GO:0016020	C:membrane			no IPS match	no IPS match	no IPS match	ENOG		2.7e-157	Sarcocystidae		0
TGME49_228280	[INTERPRO, BLASTED]	hypothetical protein TGPRC2_228280	386	14	6.71374e-153	89.31						no IPS match	no IPS match	no IPS match	ENOG		4.3e-182	Sarcocystidae		0
TGME49_228310	[INTERPRO, BLASTED, MAPPED, ANNOTATED]	putative transmembrane protein	185	6	6.7127e-121	84.68	1	C:GO:0016020	C:membrane			no IPS match	no IPS match	no IPS match	ENOG		4.3e-103	Sarcocystidae		0
TGME49_228340	[INTERPRO, BLASTED, MAPPED, ANNOTATED]	putative elongation factor Tu GTP-binding domain protein	1771	14	0	90.02	4	P:GO:0006414; F:GO:0003746; C:GO:0005654; C:GO:0005730	P:translational elongation; F:translation elongation factor activity; C:nucleoplasm; C:nucleolus			no IPS match	no IPS match	no IPS match	ENOG	elongation factor Tu GTP binding domain-containing protein	0	Sarcocystidae		0
TGME49_228370	[INTERPRO, BLASTED, MAPPED, ANNOTATED]	s1/P1 nuclease	397	20	0	85.76	8	P:GO:0006308; F:GO:0003676; F:GO:0004519; F:GO:0046872	P:DNA catabolic process; F:nucleic acid binding; F:endonuclease activity; F:metal ion binding	EC:3.1; EC:3	Acting on ester bonds; Hydrolases	IPR008947 (G3DSA:1.10.575.GENE3D); IPR003154 (PFAM); IPR003154 (PANTHER); IPR003154 (CDD); IPR008947 (SUPERFAMILY)	P:GO:0006308; F:GO:0003676; F:GO:0004519; F:GO:0016788	P:DNA catabolic process; F:nucleic acid binding; F:endonuclease activity; F:hydrolase activity, acting on ester bonds	ENOG	S1/P1 Nuclease	2e-230	Sarcocystidae		0
TGME49_228380	[INTERPRO, BLASTED]	putative F-box protein	1726	13	0	85.44						no IPS match	no IPS match	no IPS match	ENOG		0	Sarcocystidae		0
TGME49_228390	[INTERPRO, BLASTED, MAPPED, ANNOTATED]	hypothetical protein TGME49_228390	2320	19	0	85.66	4	P:GO:0038203; P:GO:0051897; F:GO:0043539; C:GO:0031932	P:TORC2 signaling; P:positive regulation of phosphatidylinositol 3-kinase/protein kinase B signal transduction; F:protein serine/threonine kinase activator activity; C:TORC2 complex			IPR029451 (PFAM); IPR028268 (PANTHER)	P:GO:0031929; P:GO:0038203; C:GO:0031932	P:TOR signaling; P:TORC2 signaling; C:TORC2 complex	ENOG		0	Sarcocystidae		0
TGME49_228395	[INTERPRO, BLASTED, MAPPED, ANNOTATED]	hypothetical protein TGME49_228395	2072	16	0	91.49	6	P:GO:0000226; P:GO:0038203; P:GO:0051897; F:GO:0043539; C:GO:0015630; C:GO:0031932	P:microtubule cytoskeleton organization; P:TORC2 signaling; P:positive regulation of phosphatidylinositol 3-kinase/protein kinase B signal transduction; F:protein serine/threonine kinase activator activity; C:microtubule cytoskeleton; C:TORC2 complex			no IPS match	no IPS match	no IPS match	ENOG		0	Sarcocystidae		0
TGME49_228430	[INTERPRO, BLASTED]	hypothetical protein TGME49_228430	484	13	0	91.32						no IPS match	no IPS match	no IPS match	ENOG		2.8e-279	Sarcocystidae		0
TGME49_228440	[INTERPRO, BLASTED, MAPPED]	hypothetical protein TGME49_228440	283	20	0	70.99	4	P:GO:0006139; F:GO:0003676; F:GO:0004527; F:GO:0008408	P:nucleobase-containing compound metabolic process; F:nucleic acid binding; F:exonuclease activity; F:3'-5' exonuclease activity			no IPS match	no IPS match	no IPS match	ENOG		9e-145	Sarcocystidae		0
TGME49_228460	[INTERPRO, BLASTED]	hypothetical protein TGME49_228460	1191	20	0	92.98						IPR012340 (G3DSA:2.40.50.GENE3D); PS51257 (PROSITE_PROFILES); IPR012340 (SUPERFAMILY)	no GO terms	no GO terms	ENOG		0	Sarcocystidae		0
TGME49_228480	[INTERPRO, BLASTED]	hypothetical protein TGME49_228480	153	1	1.56196e-105	100						no IPS match	no IPS match	no IPS match
TGME49_228640	[INTERPRO, BLASTED]	hypothetical protein TGME49_228640	156	6	1.2005e-59	97.41						no IPS match	no IPS match	no IPS match
TGME49_228710	[INTERPRO, BLASTED, MAPPED, ANNOTATED]	small subunit rrna synthesis-associated	1290	14	0	91.2	2	P:GO:0034472; C:GO:0032039	P:snRNA 3'-end processing; C:integrator complex			G3DSA:3.40.50.10890 (GENE3D); IPR036866 (G3DSA:3.60.15.GENE3D); IPR036866 (SUPERFAMILY)	no GO terms	no GO terms	COG,KOG,ENOG	snRNA processing	0	Sarcocystidae		0
TGME49_228720	[INTERPRO, BLASTED, MAPPED, ANNOTATED]	putative POP4 domain protein	466	20	0	85.28	10	P:GO:0001682; P:GO:0006364; F:GO:0033204; C:GO:0000172; C:GO:0030677	P:tRNA 5'-leader removal; P:rRNA processing; F:ribonuclease P RNA binding; C:ribonuclease MRP complex; C:ribonuclease P complex	EC:3.1.26.5	ribonuclease P	IPR036980 (G3DSA:2.30.30.GENE3D); IPR002730 (PFAM); IPR016848 (PANTHER); IPR023534 (SUPERFAMILY)	P:GO:0001682; P:GO:0006364; P:GO:0006396; P:GO:0008033; F:GO:0003723; F:GO:0033204; C:GO:0000172; C:GO:0030677	P:tRNA 5'-leader removal; P:rRNA processing; P:RNA processing; P:tRNA processing; F:RNA binding; F:ribonuclease P RNA binding; C:ribonuclease MRP complex; C:ribonuclease P complex	KOG,ENOG	Domain of unknown function UPF0086	7e-211	Sarcocystidae	EC:3.1.26.5	0			K03538	map03008,map03013
TGME49_228760	[INTERPRO, BLASTED, MAPPED]	hypothetical protein TGME49_228760	449	13	0	77.44	1	C:GO:0016020	C:membrane			IPR036865 (SUPERFAMILY)	no GO terms	no GO terms	ENOG		1.4e-248	Sarcocystidae		0
TGME49_228770	[INTERPRO, BLASTED, MAPPED, ANNOTATED]	hypothetical protein TGME49_228770	530	20	0	71.7	1	C:GO:0016020	C:membrane			no IPS match	no IPS match	no IPS match	ENOG		1.9e-260	Sarcocystidae		0
TGME49_228980	[INTERPRO, BLASTED]	hypothetical protein TGME49_228980	389	1	3.284e-48	100						no IPS match	no IPS match	no IPS match
TGME49_229005	[INTERPRO, BLASTED]	hypothetical protein TGME49_229005	143	6	1.12729e-83	96.82						no IPS match	no IPS match	no IPS match
TGME49_229190	[INTERPRO, BLASTED]	hypothetical protein TGME49_229190	122	8	1.12417e-31	99.31						no IPS match	no IPS match	no IPS match
TGME49_229220	[INTERPRO, BLASTED, MAPPED]	hypothetical protein TGME49_229220	230	9	2.22804e-170	91.77	1	C:GO:0016020	C:membrane			no IPS match	no IPS match	no IPS match	ENOG		7.4e-129	Sarcocystidae		0
TGME49_229230	[INTERPRO, BLASTED]	putative toxoplasma gondii family A protein	315	12	0	63.77						no IPS match	no IPS match	no IPS match	ENOG		2.9e-176	Sarcocystidae		0
TGME49_229240	[INTERPRO, BLASTED, MAPPED, ANNOTATED]	toxoplasma gondii family a protein	270	20	0	60.22	1	C:GO:0016020	C:membrane			no IPS match	no IPS match	no IPS match	ENOG		1.5e-141	Sarcocystidae		0
TGME49_229270	[INTERPRO, BLASTED, MAPPED]	putative toxoplasma gondii family A protein	212	20	1.1528e-154	66.71	1	C:GO:0016020	C:membrane			no IPS match	no IPS match	no IPS match	ENOG		1.9e-115	Sarcocystidae		0
TGME49_229280	[INTERPRO, BLASTED]	toxoplasma gondii family a protein	709	8	0	83.64						no IPS match	no IPS match	no IPS match	ENOG		0	Sarcocystidae		0
TGME49_229300	[INTERPRO, BLASTED, MAPPED, ANNOTATED]	putative transmembrane protein	347	5	2.2142e-75	98.5	1	C:GO:0016020	C:membrane			no IPS match	no IPS match	no IPS match
TGME49_229340	[INTERPRO, BLASTED, MAPPED, ANNOTATED]	putative transmembrane protein	1904	20	0	95.1	3	P:GO:0031087; C:GO:0000932; C:GO:0016020	P:deadenylation-independent decapping of nuclear-transcribed mRNA; C:P-body; C:membrane			no IPS match	no IPS match	no IPS match	ENOG		0	Sarcocystidae		0
TGME49_229380	[INTERPRO, BLASTED, MAPPED, ANNOTATED]	lecithin retinol acyltransferase	1008	20	0	80.8	4	F:GO:0016746; C:GO:0016020	F:acyltransferase activity; C:membrane	EC:2.3; EC:2	Acyltransferases; Transferases	G3DSA:3.90.1720.10 (GENE3D); IPR007053 (PFAM); PIRSR642288-1 (PIRSR); IPR007053 (PROSITE_PROFILES)	no GO terms	no GO terms	ENOG		0	Sarcocystidae		0
TGME49_229390	[INTERPRO, BLASTED, MAPPED, ANNOTATED]	hypothetical protein TGME49_229390	964	16	0	78.95	1	F:GO:0005488	F:binding			G3DSA:2.10.110.10 (GENE3D); IPR022087 (PFAM); cd08368 (CDD)	no GO terms	no GO terms	ENOG	Protein DA1	0	Sarcocystidae		0
TGME49_229450	[INTERPRO, BLASTED]	hypothetical protein TGME49_229450	136	8	2.42205e-73	91.36						no IPS match	no IPS match	no IPS match	ENOG		3.8e-64	Sarcocystidae		0
TGME49_229500	[INTERPRO, BLASTED, MAPPED, ANNOTATED]	putative transmembrane protein	297	20	0	61.96	1	C:GO:0016020	C:membrane			no IPS match	no IPS match	no IPS match	ENOG		1.3e-170	Sarcocystidae		0
TGME49_229620	[INTERPRO, BLASTED]	hypothetical protein TGME49_229620	1012	20	0	94.48						no IPS match	no IPS match	no IPS match	ENOG		0	Sarcocystidae		0
TGME49_229660	[INTERPRO, BLASTED, MAPPED, ANNOTATED]	putative transmembrane protein	181	7	8.57023e-53	98.65	1	C:GO:0016020	C:membrane			no IPS match	no IPS match	no IPS match
TGME49_229680	[INTERPRO, BLASTED, MAPPED, ANNOTATED]	putative transmembrane protein	160	20	7.84531e-90	76.8	1	C:GO:0016020	C:membrane			no IPS match	no IPS match	no IPS match	ENOG		5.4e-86	Sarcocystidae		0
TGME49_229720	[INTERPRO, BLASTED]	hypothetical protein TGVEG_229720	2258	14	0	96.52						no IPS match	no IPS match	no IPS match	ENOG		0	Sarcocystidae		0
TGME49_229740	[INTERPRO, BLASTED]	hypothetical protein TGGT1_229740	547	20	0	88.49						no IPS match	no IPS match	no IPS match	ENOG		2.6e-249	Sarcocystidae		0
TGME49_229750	[INTERPRO, BLASTED, MAPPED, ANNOTATED]	Fms-interacting protein	1364	20	0	96.24	4	P:GO:0031087; C:GO:0000932; C:GO:0005634; C:GO:0016020	P:deadenylation-independent decapping of nuclear-transcribed mRNA; C:P-body; C:nucleus; C:membrane			IPR019163 (PFAM)	no GO terms	no GO terms	ENOG	Fms-interacting protein	0	Sarcocystidae		0
TGME49_229770	[INTERPRO, BLASTED]	hypothetical protein TGME49_229770	1230	14	0	94.43						no IPS match	no IPS match	no IPS match	ENOG		0	Sarcocystidae		0
TGME49_229790	[INTERPRO, BLASTED, MAPPED]	hypothetical protein TGME49_229790	1090	20	0	91.09	1	C:GO:0005576	C:extracellular region			no IPS match	no IPS match	no IPS match	ENOG		0	Sarcocystidae		0
TGME49_230000	[INTERPRO, BLASTED]	RAVE 1 carboxy-terminal protein	6666	20	0	99.43						IPR022033 (PFAM); IPR015943 (G3DSA:2.130.10.GENE3D); IPR051352 (PANTHER); IPR036322 (SUPERFAMILY)	F:GO:0005515	F:protein binding	KOG,ENOG	RAVE protein 1 C terminal	0	Sarcocystidae		0
TGME49_230010	[INTERPRO, BLASTED, MAPPED, ANNOTATED]	suppressor of forked protein SUF	1295	20	0	94.45	3	P:GO:0031124; F:GO:0003729; C:GO:0005634	P:mRNA 3'-end processing; F:mRNA binding; C:nucleus			IPR011990 (G3DSA:1.25.40.GENE3D); IPR008847 (PFAM); IPR011990 (SUPERFAMILY); IPR011990 (SUPERFAMILY)	P:GO:0006396; F:GO:0005515; C:GO:0005634	P:RNA processing; F:protein binding; C:nucleus	COG,KOG,ENOG	mRNA processing	0	Sarcocystidae		0
TGME49_230110	[INTERPRO, BLASTED]	hypothetical protein TGME49_230110	1251	14	0	93.9						no IPS match	no IPS match	no IPS match	ENOG		0	Sarcocystidae		0
TGME49_230122	[INTERPRO, BLASTED]	TPA: hypothetical protein BN1205_025390	177	12	2.0581e-70	97.24						no IPS match	no IPS match	no IPS match	ENOG		3e-45	Sarcocystidae		0
TGME49_230130	[INTERPRO, BLASTED]	hypothetical protein TGRH88_074620	385	12	7.05957e-180	92.89						IPR053729 (G3DSA:3.30.900.GENE3D)	no GO terms	no GO terms	ENOG		2.1e-75	Sarcocystidae		0
TGME49_230170	[INTERPRO, BLASTED]	hypothetical protein TGME49_230170	1656	20	0	83.48						no IPS match	no IPS match	no IPS match	ENOG		0	Sarcocystidae		0
TGME49_230190	[INTERPRO, BLASTED, MAPPED]	hypothetical protein TGME49_230190	290	8	0	79.8	2	F:GO:0000976; C:GO:0005634	F:transcription cis-regulatory region binding; C:nucleus			no IPS match	no IPS match	no IPS match	ENOG		2.5e-158	Sarcocystidae		0
TGME49_230200	[INTERPRO, BLASTED, MAPPED, ANNOTATED]	putative C6orf165-like protein	655	20	0	69.23	5	P:GO:0003356; P:GO:0007288; P:GO:1901317; C:GO:0005930; C:GO:0036064	P:regulation of cilium beat frequency; P:sperm axoneme assembly; P:regulation of flagellated sperm motility; C:axoneme; C:ciliary basal body			IPR021897 (PFAM); IPR021897 (PANTHER)	P:GO:0003356; C:GO:0005930; C:GO:0036064	P:regulation of cilium beat frequency; C:axoneme; C:ciliary basal body	ENOG		2.9e-295	Sarcocystidae		0
TGME49_230205	[INTERPRO, BLASTED]	hypothetical protein TGME49_230205	97	6	4.4809e-66	94.13						no IPS match	no IPS match	no IPS match
TGME49_230480	[INTERPRO, BLASTED, MAPPED, ANNOTATED]	putative transmembrane protein	85	20	7.24653e-53	86.28	1	C:GO:0016020	C:membrane			no IPS match	no IPS match	no IPS match	ENOG	Encoded by	5.3e-40	Sarcocystidae		0
TGME49_230500	[INTERPRO, BLASTED]	hypothetical protein TGME49_230500	833	17	0	91.89						no IPS match	no IPS match	no IPS match	ENOG		0	Sarcocystidae		0
TGME49_230510	[INTERPRO, BLASTED, MAPPED, ANNOTATED]	putative transmembrane protein	372	9	0	86.56	1	C:GO:0016020	C:membrane			no IPS match	no IPS match	no IPS match	ENOG		5.4e-206	Sarcocystidae		0
TGME49_230535	[INTERPRO, BLASTED]	putative membrane protein	356	20	0	77.7						no IPS match	no IPS match	no IPS match	ENOG		2e-194	Sarcocystidae		0
TGME49_230580	[INTERPRO, BLASTED, MAPPED, ANNOTATED]	D123-domain-containing protein	1133	20	0	75.8	1	C:GO:0005737	C:cytoplasm			IPR009772 (PFAM)	no GO terms	no GO terms	KOG,ENOG	D123	0	Sarcocystidae		0
TGME49_230630	[INTERPRO, BLASTED, MAPPED, ANNOTATED]	atp-dependent rna	978	20	0	70.93	7	P:GO:0000963; P:GO:0044528; P:GO:1901259; F:GO:0003723; C:GO:0005759; C:GO:0009507; C:GO:0035770	P:mitochondrial RNA processing; P:regulation of mitochondrial mRNA stability; P:chloroplast rRNA processing; F:RNA binding; C:mitochondrial matrix; C:chloroplast; C:ribonucleoprotein granule			IPR050870 (PANTHER)	P:GO:0000963; P:GO:0044528; F:GO:0003723; C:GO:0005759; C:GO:0035770	P:mitochondrial RNA processing; P:regulation of mitochondrial mRNA stability; F:RNA binding; C:mitochondrial matrix; C:ribonucleoprotein granule	ENOG		0	Sarcocystidae		0
TGME49_230640	[INTERPRO, BLASTED, MAPPED, ANNOTATED]	oxidoreductase-like, amine-terminal protein	168	5	4.62892e-81	86.81	1	C:GO:0005739	C:mitochondrion			IPR019180 (PFAM); IPR039251 (PANTHER)	no GO terms	no GO terms	ENOG		3e-79	Sarcocystidae		0
TGME49_230700	[INTERPRO, BLASTED, MAPPED, ANNOTATED]	hypothetical protein TGME49_230700	1963	12	0	85.45	3	P:GO:0006890; P:GO:0060628; C:GO:0070939	P:retrograde vesicle-mediated transport, Golgi to endoplasmic reticulum; P:regulation of ER to Golgi vesicle-mediated transport; C:Dsl1/NZR complex			IPR007528 (PANTHER)	P:GO:0006888; P:GO:0006890; P:GO:0060628; C:GO:0070939	P:endoplasmic reticulum to Golgi vesicle-mediated transport; P:retrograde vesicle-mediated transport, Golgi to endoplasmic reticulum; P:regulation of ER to Golgi vesicle-mediated transport; C:Dsl1/NZR complex	ENOG		0	Sarcocystidae		0
TGME49_230840	[INTERPRO, BLASTED, MAPPED, ANNOTATED]	putative transmembrane protein	732	17	0	95.18	1	C:GO:0016020	C:membrane			IPR023271 (SUPERFAMILY)	no GO terms	no GO terms	ENOG		0	Sarcocystidae		0
TGME49_230870	[INTERPRO, BLASTED, MAPPED, ANNOTATED]	putative transmembrane protein	197	6	3.48261e-70	93.64	3	P:GO:0006914; C:GO:0005737; C:GO:0016020	P:autophagy; C:cytoplasm; C:membrane			no IPS match	no IPS match	no IPS match	ENOG		3.4e-82	Sarcocystidae		0
TGME49_230880	[INTERPRO, BLASTED]	putative glutamic acid-rich protein	1049	13	0	95.16						no IPS match	no IPS match	no IPS match	ENOG		0	Sarcocystidae		0
TGME49_230900	[INTERPRO, BLASTED]	kinase domain protein	164	7	2.38649e-114	98.37						no IPS match	no IPS match	no IPS match
TGME49_230910	[INTERPRO, BLASTED, MAPPED, ANNOTATED]	putative transmembrane protein	453	20	0	81.27	1	C:GO:0016020	C:membrane			IPR012349 (G3DSA:2.30.110.GENE3D)	no GO terms	no GO terms	ENOG		2.1e-199	Sarcocystidae		0
TGME49_230940	[INTERPRO, BLASTED]	hypothetical protein TGME49_230940	1523	20	0	97.41						no IPS match	no IPS match	no IPS match	ENOG	Encoded by	0	Sarcocystidae		0
TGME49_230950	[INTERPRO, BLASTED, MAPPED, ANNOTATED]	TPA: hypothetical protein BN1205_024630	2385	20	0	97.37	1	F:GO:0003729	F:mRNA binding			PTHR13491 (PANTHER); IPR016024 (SUPERFAMILY)	no GO terms	no GO terms	ENOG		0	Sarcocystidae		0
TGME49_230970	[INTERPRO, BLASTED]	TPA: hypothetical protein BN1205_024610	100	7	8.64264e-50	94.73						no IPS match	no IPS match	no IPS match	ENOG		3.7e-53	Sarcocystidae		0
TGME49_230990	[INTERPRO, BLASTED, MAPPED, ANNOTATED]	putative nucleotidyltransferase family protein	1148	20	0	82.34	6	P:GO:0015937; F:GO:0004140; F:GO:0004595	P:coenzyme A biosynthetic process; F:dephospho-CoA kinase activity; F:pantetheine-phosphate adenylyltransferase activity	EC:2.7.1; EC:2.7.7.3; EC:2.7; EC:2; EC:2.7.7; EC:2.7.1.24	Transferring phosphorus-containing groups; pantetheine-phosphate adenylyltransferase; Transferring phosphorus-containing groups; Transferases; Transferring phosphorus-containing groups; dephospho-CoA kinase	IPR014729 (G3DSA:3.40.50.GENE3D)	no GO terms	no GO terms	ENOG		0	Sarcocystidae		0
TGME49_231020	[INTERPRO, BLASTED]	hypothetical protein TGME49_231020	198	8	3.99491e-123	82.69						no IPS match	no IPS match	no IPS match	ENOG		1.5e-106	Sarcocystidae		0
TGME49_231050	[INTERPRO, BLASTED]	hypothetical protein TGME49_231050	183	5	1.597e-133	99.04						no IPS match	no IPS match	no IPS match	ENOG		3.6e-102	Sarcocystidae		0
TGME49_231055	[INTERPRO, BLASTED]	hypothetical protein TGME49_231055	185	3	9.4901e-136	100						no IPS match	no IPS match	no IPS match
TGME49_231090	[INTERPRO, BLASTED]	toxoplasma gondii family d protein	542	20	0	66.99						no IPS match	no IPS match	no IPS match	ENOG		1.5e-140	Sarcocystidae		0
TGME49_231100	[INTERPRO, BLASTED, MAPPED, ANNOTATED]	putative transmembrane protein	492	20	0	60.84	1	C:GO:0016020	C:membrane			IPR049856 (CDD)	no GO terms	no GO terms	ENOG		2.7e-277	Sarcocystidae		0
TGME49_231125	[INTERPRO, BLASTED, MAPPED, ANNOTATED]	putative transmembrane protein	277	6	9.65534e-156	93.86	1	C:GO:0016020	C:membrane			no IPS match	no IPS match	no IPS match	ENOG		6.9e-65	Sarcocystidae		0
TGME49_231150	[INTERPRO, BLASTED, MAPPED, ANNOTATED]	beta-lactamase superfamily domain protein	662	20	0	76.13	10	P:GO:0070291; P:GO:0070292; F:GO:0070290; C:GO:0005737; C:GO:0043227	P:N-acylethanolamine metabolic process; P:N-acylphosphatidylethanolamine metabolic process; F:N-acylphosphatidylethanolamine-specific phospholipase D activity; C:cytoplasm; C:membrane-bounded organelle	EC:3.1.4; EC:3.1; EC:3; EC:3.1.4.54	Acting on ester bonds; Acting on ester bonds; Hydrolases; N-acetylphosphatidylethanolamine-hydrolyzing phospholipase D	IPR036866 (G3DSA:3.60.15.GENE3D); IPR001279 (PFAM); PTHR15032 (PANTHER); IPR036866 (SUPERFAMILY)	C:GO:0005737	C:cytoplasm	COG,KOG,ENOG	Beta-lactamase superfamily domain	5.1e-308	Sarcocystidae		0
TGME49_231160	[INTERPRO, BLASTED]	hypothetical protein TGME49_231160	178	10	3.4181e-100	73.8						no IPS match	no IPS match	no IPS match	ENOG		2.3e-93	Sarcocystidae		0
TGME49_231175	[INTERPRO, BLASTED]	hypothetical protein TGME49_231175	151	6	6.45804e-93	98.68						no IPS match	no IPS match	no IPS match
TGME49_231180	[INTERPRO, BLASTED, MAPPED, ANNOTATED]	putative transmembrane protein	496	8	0	99.52	1	C:GO:0016020	C:membrane			no IPS match	no IPS match	no IPS match	ENOG		4e-273	Sarcocystidae		0
TGME49_231200	[INTERPRO, BLASTED, MAPPED, ANNOTATED]	hypothetical protein TGME49_231200	2710	18	0	90.43	13	P:GO:0006612; P:GO:0072318; P:GO:0072583; F:GO:0008187; F:GO:0030276; F:GO:0030628; F:GO:0051082; C:GO:0000243; C:GO:0005854; C:GO:0016607; C:GO:0031982; C:GO:0071004; C:GO:0089701	P:protein targeting to membrane; P:clathrin coat disassembly; P:clathrin-dependent endocytosis; F:poly-pyrimidine tract binding; F:clathrin binding; F:pre-mRNA 3'-splice site binding; F:unfolded protein binding; C:commitment complex; C:nascent polypeptide-associated complex; C:nuclear speck; C:vesicle; C:U2-type prespliceosome; C:U2AF complex			no IPS match	no IPS match	no IPS match	ENOG		0	Sarcocystidae		0
TGME49_231220	[INTERPRO, BLASTED, MAPPED, ANNOTATED]	putative transmembrane protein	451	20	0	69.38	1	C:GO:0016020	C:membrane			no IPS match	no IPS match	no IPS match	ENOG		5.5e-245	Sarcocystidae		0
TGME49_231230	[INTERPRO, BLASTED]	hypothetical protein TGME49_231230	117	3	2.97247e-66	99.72						no IPS match	no IPS match	no IPS match
TGME49_231360	[INTERPRO, BLASTED, MAPPED, ANNOTATED]	putative transmembrane protein	1008	20	0	94.03	1	C:GO:0016020	C:membrane			no IPS match	no IPS match	no IPS match	ENOG		0	Sarcocystidae		0
TGME49_231390	[INTERPRO, BLASTED, MAPPED, ANNOTATED]	putative transmembrane protein	264	20	0	79.64	1	C:GO:0016020	C:membrane			PS51257 (PROSITE_PROFILES)	no GO terms	no GO terms	ENOG		1e-142	Sarcocystidae		0
TGME49_231450	[INTERPRO, BLASTED]	hypothetical protein TGME49_231450	158	4	7.98966e-110	98.89						no IPS match	no IPS match	no IPS match
TGME49_231460	[INTERPRO, BLASTED]	hypothetical protein TGME49_231460	704	20	0	77.3						no IPS match	no IPS match	no IPS match	ENOG		0	Sarcocystidae		0
TGME49_231470	[INTERPRO, BLASTED]	hypothetical protein TGCOUG_231470	1342	12	0	83.05						no IPS match	no IPS match	no IPS match	ENOG		2e-303	Sarcocystidae		0
TGME49_231625	[INTERPRO, BLASTED]	putative transmembrane protein	464	10	0	79.18						no IPS match	no IPS match	no IPS match	ENOG		4e-243	Eukaryota		0
TGME49_231750	[INTERPRO, BLASTED, MAPPED, ANNOTATED]	macro domain protein	630	20	0	65.76	1	F:GO:0061463	F:O-acetyl-ADP-ribose deacetylase activity	EC:3	Hydrolases	IPR043472 (G3DSA:3.40.220.GENE3D); IPR002589 (PFAM); PTHR11106 (PANTHER); IPR002589 (PROSITE_PROFILES); IPR043472 (SUPERFAMILY)	no GO terms	no GO terms	ENOG		3e-281	Sarcocystidae		0
TGME49_231780	[INTERPRO, BLASTED, MAPPED, ANNOTATED]	putative transmembrane protein	510	11	0	88.05	1	C:GO:0016020	C:membrane			no IPS match	no IPS match	no IPS match	ENOG		7.5e-299	Sarcocystidae		0
TGME49_231790	[INTERPRO, BLASTED, MAPPED]	Photosystem I reaction center subunit IV	1232	20	0	81.87	4	P:GO:0015979; C:GO:0009522; C:GO:0009538; C:GO:0016020	P:photosynthesis; C:photosystem I; C:photosystem I reaction center; C:membrane			no IPS match	no IPS match	no IPS match	ENOG		0	Sarcocystidae		0
TGME49_231815	[INTERPRO, BLASTED, MAPPED, ANNOTATED]	putative tRNA splicing endonuclease	3981	20	0	96.24	6	P:GO:0006369; F:GO:0001147; F:GO:0004386; F:GO:0004519; C:GO:0016020; C:GO:0016604	P:termination of RNA polymerase II transcription; F:transcription termination site sequence-specific DNA binding; F:helicase activity; F:endonuclease activity; C:membrane; C:nuclear body	EC:3.1	Acting on ester bonds	IPR027417 (G3DSA:3.40.50.GENE3D); IPR041677 (PFAM); IPR027417 (G3DSA:3.40.50.GENE3D); IPR041679 (PFAM); IPR045055 (PANTHER); IPR047187 (CDD); IPR027417 (SUPERFAMILY)	F:GO:0004386	F:helicase activity	COG,KOG,ENOG	tRNA-splicing endonuclease positive	0	Sarcocystidae		0
TGME49_231860	[INTERPRO, BLASTED]	hypothetical protein TGME49_231860	280	7	0	89.51						no IPS match	no IPS match	no IPS match	ENOG		2.3e-124	Sarcocystidae		0
TGME49_231865	[INTERPRO, BLASTED]	hypothetical protein TGME49_231865	93	4	1.02416e-59	89.02						no IPS match	no IPS match	no IPS match
TGME49_231880	[INTERPRO, BLASTED, MAPPED]	putative glutamine/glutamic acid rich protein	397	11	0	75.86	2	F:GO:0005509; C:GO:0016020	F:calcium ion binding; C:membrane			no IPS match	no IPS match	no IPS match	ENOG		1.2e-155	Sarcocystidae		0
TGME49_231950	[INTERPRO, BLASTED]	hypothetical protein TGME49_231950	381	8	0	94.07						no IPS match	no IPS match	no IPS match	ENOG		4.1e-209	Sarcocystidae		0
TGME49_231980	[INTERPRO, BLASTED, MAPPED]	hypothetical protein TGME49_231980	1689	20	0	77.58	6	F:GO:0000976; F:GO:0001540; C:GO:0005576; C:GO:0005634; C:GO:0005737; C:GO:0005886	F:transcription cis-regulatory region binding; F:amyloid-beta binding; C:extracellular region; C:nucleus; C:cytoplasm; C:plasma membrane			no IPS match	no IPS match	no IPS match	ENOG		0	Sarcocystidae		0
TGME49_231990	[INTERPRO, BLASTED, MAPPED, ANNOTATED]	putative transmembrane protein	108	6	4.05424e-53	95.41	1	C:GO:0016020	C:membrane			no IPS match	no IPS match	no IPS match	ENOG		3.8e-51	Sarcocystidae		0
TGME49_231991	[INTERPRO, BLASTED, MAPPED, ANNOTATED]	putative transmembrane protein	152	4	3.34802e-108	99.67	1	C:GO:0016020	C:membrane			no IPS match	no IPS match	no IPS match
TGME49_231992	[INTERPRO, BLASTED]	hypothetical protein TGME49_231992	117	6	3.9171e-79	98.72						no IPS match	no IPS match	no IPS match
TGME49_231994	[INTERPRO, BLASTED]	hypothetical protein TGME49_231994	102	8	9.49397e-66	98.41						no IPS match	no IPS match	no IPS match
TGME49_231996	[INTERPRO, BLASTED]	hypothetical protein TGME49_231996	175	5	1.87049e-127	97.97						no IPS match	no IPS match	no IPS match
TGME49_231998	[INTERPRO, BLASTED]	hypothetical protein TGRH88_076110	740	4	8.36602e-46	99.7						PS51257 (PROSITE_PROFILES)	no GO terms	no GO terms
TGME49_232060	[INTERPRO, BLASTED, MAPPED, ANNOTATED]	peptidase family T4 protein	469	20	0	88.04	2	F:GO:0004177	F:aminopeptidase activity	EC:3.4.11; EC:3.4; EC:3	Acting on peptide bonds (peptidases); Acting on peptide bonds (peptidases); Hydrolases	IPR005321 (PFAM); G3DSA:3.60.70.12 (GENE3D); G3DSA:3.60.70.12 (GENE3D); IPR005321 (PANTHER); IPR016117 (SUPERFAMILY)	F:GO:0004177	F:aminopeptidase activity	COG,ENOG	Peptidase family S58	6.5e-257	Sarcocystidae		0
TGME49_232085	[INTERPRO, BLASTED]	hypothetical protein TGME49_232085	158	7	6.15554e-96	98.94						no IPS match	no IPS match	no IPS match
TGME49_232110	[INTERPRO, BLASTED]	hypothetical protein TGME49_232110	181	5	8.00615e-115	97.46						no IPS match	no IPS match	no IPS match
TGME49_232120	[INTERPRO, BLASTED, MAPPED, ANNOTATED]	putative transmembrane protein	2026	20	0	91.98	3	P:GO:0098655; F:GO:0005227; C:GO:0005886	P:monoatomic cation transmembrane transport; F:calcium-activated cation channel activity; C:plasma membrane			IPR003864 (PFAM); IPR032880 (PFAM); IPR045122 (PANTHER)	F:GO:0005227; C:GO:0005886; C:GO:0016020	F:calcium-activated cation channel activity; C:plasma membrane; C:membrane	COG,KOG,ENOG	Calcium-dependent channel, 7TM region, putative phosphate	0	Sarcocystidae		0			K21989
TGME49_232140	[INTERPRO, BLASTED]	hypothetical protein TGME49_232140	377	11	0	89.92						no IPS match	no IPS match	no IPS match	ENOG		2.6e-184	Sarcocystidae		0
TGME49_232170	[INTERPRO, BLASTED]	putative transmembrane protein	745	20	0	79.45						IPR011047 (SUPERFAMILY); SSF82171 (SUPERFAMILY)	no GO terms	no GO terms	ENOG		0	Sarcocystidae		0
TGME49_232200	[INTERPRO, BLASTED]	hypothetical protein TGME49_232200	158	8	2.11255e-111	95.33						no IPS match	no IPS match	no IPS match	ENOG		1.8e-81	Sarcocystidae		0
TGME49_232210	[INTERPRO, BLASTED, MAPPED, ANNOTATED]	hypothetical protein TGME49_232210	320	20	8.53645e-176	85.68	2	P:GO:0006367; C:GO:0005672	P:transcription initiation at RNA polymerase II promoter; C:transcription factor TFIIA complex			IPR009088 (G3DSA:2.30.18.GENE3D); IPR009088 (SUPERFAMILY)	P:GO:0006367; C:GO:0005672	P:transcription initiation at RNA polymerase II promoter; C:transcription factor TFIIA complex	ENOG		1.1e-117	Sarcocystidae		0
TGME49_232280	[INTERPRO, BLASTED]	hypothetical protein TGRH88_076410	314	16	0	69.14						IPR040955 (PFAM)	no GO terms	no GO terms	ENOG		9e-170	Sarcocystidae		0
TGME49_232290	[INTERPRO, BLASTED, MAPPED, ANNOTATED]	hypothetical protein TGME49_232290	323	20	0	64.83	1	F:GO:0030246	F:carbohydrate binding			IPR000922 (PFAM); IPR043159 (G3DSA:2.60.120.GENE3D); IPR000922 (PROSITE_PROFILES)	F:GO:0030246	F:carbohydrate binding	ENOG		1.3e-184	Sarcocystidae		0
TGME49_232320	[INTERPRO, BLASTED]	hypothetical protein TGME49_232320	1477	18	0	89.32						no IPS match	no IPS match	no IPS match	ENOG		0	Sarcocystidae		0
TGME49_232420	[INTERPRO, BLASTED]	hypothetical protein TGME49_232420	458	13	0	87.25						no IPS match	no IPS match	no IPS match	ENOG		1.3e-233	Sarcocystidae		0
TGME49_232475	[INTERPRO, BLASTED]	putative paramyosin	808	12	0	95.05						no IPS match	no IPS match	no IPS match	ENOG		0	Sarcocystidae		0
TGME49_232550	[INTERPRO, BLASTED]	hypothetical protein TGME49_232550	227	15	1.51684e-163	69.17						no IPS match	no IPS match	no IPS match	ENOG		2.2e-117	Sarcocystidae		0
TGME49_232560	[INTERPRO, BLASTED]	hypothetical protein TGME49_232560	1822	17	0	90.22						no IPS match	no IPS match	no IPS match	ENOG		0	Sarcocystidae		0
TGME49_232620	[INTERPRO, BLASTED, MAPPED, ANNOTATED]	dual specificity phosphatase, catalytic domain protein	894	20	0	68.89	20	P:GO:0008285; P:GO:0046856; P:GO:0048870; P:GO:0051896; F:GO:0004725; F:GO:0016314; C:GO:0005634; C:GO:0005829; C:GO:0005886; C:GO:0042995	P:negative regulation of cell population proliferation; P:phosphatidylinositol dephosphorylation; P:cell motility; P:regulation of phosphatidylinositol 3-kinase/protein kinase B signal transduction; F:protein tyrosine phosphatase activity; F:phosphatidylinositol-3,4,5-trisphosphate 3-phosphatase activity; C:nucleus; C:cytosol; C:plasma membrane; C:cell projection	EC:3.1; EC:3.1.3.48; EC:3.1.3.67; EC:3; EC:3.1.3	Acting on ester bonds; protein-tyrosine-phosphatase; phosphatidylinositol-3,4,5-trisphosphate 3-phosphatase; Hydrolases; Acting on ester bonds	IPR029021 (G3DSA:3.90.190.GENE3D); PIRSR620405-1 (PIRSR); PIRSR038025-50 (PIRSR); PIRSR000941-50 (PIRSR); PIRSR000939-1 (PIRSR); IPR051281 (PANTHER); IPR000387 (PROSITE_PROFILES); IPR029021 (SUPERFAMILY)	P:GO:0016311; F:GO:0016314; C:GO:0005829	P:dephosphorylation; F:phosphatidylinositol-3,4,5-trisphosphate 3-phosphatase activity; C:cytosol	COG,KOG,ENOG	phosphatidylinositol-3,4,5-trisphosphate 3-phosphatase activity	0	Sarcocystidae		0
TGME49_232630	[INTERPRO, BLASTED]	hypothetical protein TGRH88_076700	158	7	6.01315e-104	89.19						no IPS match	no IPS match	no IPS match	ENOG		1.6e-87	Sarcocystidae		0
TGME49_232655	[INTERPRO, BLASTED, MAPPED, ANNOTATED]	putative transmembrane protein	182	9	1.20021e-128	75.97	1	C:GO:0016020	C:membrane			no IPS match	no IPS match	no IPS match
TGME49_232670	[INTERPRO, BLASTED]	putative transmembrane protein	1108	20	0	67.79						no IPS match	no IPS match	no IPS match	ENOG		0	Sarcocystidae		0
TGME49_232680	[INTERPRO, BLASTED]	mediator of RNA polymerase II transcription subunit 15	1738	20	0	78.66						no IPS match	no IPS match	no IPS match	ENOG		0	Sarcocystidae		0
TGME49_232700	[INTERPRO, BLASTED, MAPPED]	Cleavage and polyadenylation specificity factor subunit 5	193	19	8.31814e-141	58.86	4	P:GO:0006397; P:GO:0031124; F:GO:0003729; C:GO:0005849	P:mRNA processing; P:mRNA 3'-end processing; F:mRNA binding; C:mRNA cleavage factor complex			no IPS match	no IPS match	no IPS match	ENOG		6.2e-105	Sarcocystidae		0
TGME49_232740	[INTERPRO, BLASTED, MAPPED]	hipothetical protein	510	20	0	73.76	1	C:GO:0016020	C:membrane			no IPS match	no IPS match	no IPS match	ENOG		3.2e-294	Sarcocystidae		0
TGME49_232770	[INTERPRO, BLASTED]	hypothetical protein TGME49_232770	105	3	2.01168e-54	92.13						no IPS match	no IPS match	no IPS match	ENOG		4.1e-50	Sarcocystidae		0
TGME49_232800	[INTERPRO, BLASTED]	hypothetical protein TGME49_232800	1503	14	0	90.6						no IPS match	no IPS match	no IPS match	ENOG		0	Sarcocystidae		0
TGME49_232950	[INTERPRO, BLASTED, MAPPED, ANNOTATED]	putative transmembrane protein	268	18	0	65.37	1	C:GO:0016020	C:membrane			no IPS match	no IPS match	no IPS match	ENOG		3.3e-136	Sarcocystidae		0
TGME49_232955	[INTERPRO, BLASTED]	hypothetical protein TGME49_232955	126	7	3.82575e-88	98.64						no IPS match	no IPS match	no IPS match
TGME49_232980	[INTERPRO, BLASTED]	putative transcription termination factor rho	1344	18	0	91.39						no IPS match	no IPS match	no IPS match	ENOG		0	Sarcocystidae		0
TGME49_232990	[INTERPRO, BLASTED]	putative transcription termination factor rho	166	8	2.7123e-36	98						no IPS match	no IPS match	no IPS match
TGME49_233160	[INTERPRO, BLASTED, MAPPED, ANNOTATED]	homeodomain-like domain protein	1874	20	0	95.93	1	F:GO:0003677	F:DNA binding			no IPS match	no IPS match	no IPS match	ENOG		0	Sarcocystidae		0
TGME49_233170	[INTERPRO, BLASTED, MAPPED, ANNOTATED]	Unconventional myosin-X	160	20	1.10484e-98	74.34	3	P:GO:0009987; F:GO:0005488; C:GO:0110165	P:cellular process; F:binding; C:cellular anatomical entity			no IPS match	no IPS match	no IPS match	ENOG		2.8e-87	Sarcocystidae		0
TGME49_233180	[INTERPRO, BLASTED, MAPPED, ANNOTATED]	hypothetical protein TGME49_233180	667	20	0	66.31	1	F:GO:0043130	F:ubiquitin binding			IPR022087 (PFAM); IPR045218 (PANTHER)	F:GO:0043130	F:ubiquitin binding	ENOG	Protein DA1	0	Sarcocystidae		0
TGME49_233210	[INTERPRO, BLASTED, MAPPED, ANNOTATED]	putative transmembrane protein	2314	16	0	90.9	1	C:GO:0016020	C:membrane			no IPS match	no IPS match	no IPS match	ENOG		0	Sarcocystidae		0
TGME49_233220	[INTERPRO, BLASTED, MAPPED, ANNOTATED]	putative transmembrane protein	1476	20	0	79.53	1	C:GO:0016020	C:membrane			no IPS match	no IPS match	no IPS match	ENOG		0	Sarcocystidae		0
TGME49_233245	[INTERPRO, BLASTED, MAPPED, ANNOTATED]	hypothetical protein TGME49_233245	2687	20	0	93.28	2	P:GO:0006338; C:GO:0005737	P:chromatin remodeling; C:cytoplasm			IPR051352 (PANTHER); IPR016024 (SUPERFAMILY)	no GO terms	no GO terms	ENOG		0	Sarcocystidae		0
TGME49_233280	[INTERPRO, BLASTED, MAPPED, ANNOTATED]	putative transmembrane protein	463	12	0	90.48	1	C:GO:0016020	C:membrane			no IPS match	no IPS match	no IPS match	ENOG		5.7e-221	Sarcocystidae		0
TGME49_233290	[INTERPRO, BLASTED]	hypothetical protein TGME49_233290	214	11	3.94889e-159	90.44						no IPS match	no IPS match	no IPS match	ENOG		2e-120	Sarcocystidae		0
TGME49_233315	[INTERPRO, BLASTED]	hypothetical protein TGME49_233315	132	2	5.88422e-91	99.62						no IPS match	no IPS match	no IPS match
TGME49_233360	[INTERPRO, BLASTED]	hypothetical protein TGME49_233360	174	13	2.74859e-108	69.24						no IPS match	no IPS match	no IPS match	ENOG		1.3e-88	Sarcocystidae		0
TGME49_233370	[INTERPRO, BLASTED, MAPPED, ANNOTATED]	putative transmembrane protein	216	9	2.20496e-160	79.17	1	C:GO:0016020	C:membrane			no IPS match	no IPS match	no IPS match	ENOG		2.2e-119	Sarcocystidae		0
TGME49_233380	[INTERPRO, BLASTED, MAPPED, ANNOTATED]	hypothetical protein TGME49_233380	1049	20	0	82.16	6	P:GO:0006281; P:GO:0006310; P:GO:0030277; P:GO:2000813; F:GO:0003677; C:GO:0043229	P:DNA repair; P:DNA recombination; P:maintenance of gastrointestinal epithelium; P:negative regulation of barbed-end actin filament capping; F:DNA binding; C:intracellular organelle			no IPS match	no IPS match	no IPS match	ENOG		0	Sarcocystidae		0
TGME49_233390	[INTERPRO, BLASTED]	hypothetical protein TGME49_233390	1152	20	0	75.62						no IPS match	no IPS match	no IPS match	ENOG		0	Sarcocystidae		0
TGME49_233405	[INTERPRO, BLASTED]	hypothetical protein TGME49_233405	290	6	0	99.77						no IPS match	no IPS match	no IPS match
TGME49_233470	[INTERPRO, BLASTED, MAPPED, ANNOTATED]	putative transmembrane protein	568	9	0	95.26	1	C:GO:0016020	C:membrane			no IPS match	no IPS match	no IPS match	ENOG		2e-284	Sarcocystidae		0
TGME49_233490	[INTERPRO, BLASTED, MAPPED, ANNOTATED]	hypothetical protein TGME49_233490	1179	15	0	89.1	3	P:GO:0016973; P:GO:0071763; C:GO:0005635	P:poly(A)+ mRNA export from nucleus; P:nuclear membrane organization; C:nuclear envelope			no IPS match	no IPS match	no IPS match	ENOG		0	Sarcocystidae		0
TGME49_233530	[INTERPRO, BLASTED, MAPPED]	hypothetical protein TGME49_233530	982	12	0	88.92	1	C:GO:0016020	C:membrane			no IPS match	no IPS match	no IPS match	ENOG		0	Sarcocystidae		0
TGME49_233610	[INTERPRO, BLASTED, MAPPED, ANNOTATED]	putative transmembrane protein	305	5	0	99.41	1	C:GO:0016020	C:membrane			no IPS match	no IPS match	no IPS match
TGME49_233670	[INTERPRO, BLASTED, MAPPED, ANNOTATED]	putative transmembrane protein	225	5	2.59918e-162	99.47	1	C:GO:0016020	C:membrane			no IPS match	no IPS match	no IPS match	ENOG		4.1e-124	Sarcocystidae		0
TGME49_233695	[INTERPRO, BLASTED, MAPPED, ANNOTATED]	putative transmembrane protein	175	14	3.03863e-80	82.95	1	C:GO:0016020	C:membrane			no IPS match	no IPS match	no IPS match	ENOG		4.4e-73	Sarcocystidae		0
TGME49_233735	[INTERPRO, BLASTED]	hypothetical protein TGME49_233735	2491	20	0	99.09						no IPS match	no IPS match	no IPS match	ENOG		0	Sarcocystidae		0
TGME49_233780	[INTERPRO, BLASTED]	putative transmembrane protein	115	6	6.29357e-41	94.51						no IPS match	no IPS match	no IPS match	ENOG		9.6e-53	Sarcocystidae		0
TGME49_233792	[INTERPRO, BLASTED]	hypothetical protein TGME49_233792	138	7	3.87278e-96	94.2						no IPS match	no IPS match	no IPS match
TGME49_233870	[INTERPRO, BLASTED]	hypothetical protein TGME49_233870	1538	13	0	97.29						no IPS match	no IPS match	no IPS match	ENOG		0	Sarcocystidae		0
TGME49_233890	[INTERPRO, BLASTED]	putative transmembrane protein	683	20	0	85.8						no IPS match	no IPS match	no IPS match	ENOG		9.7e-294	Sarcocystidae		0
TGME49_233925	[INTERPRO, BLASTED]	hypothetical protein TGME49_233925	165	8	1.78082e-117	98.52						no IPS match	no IPS match	no IPS match
TGME49_233950	[INTERPRO, BLASTED]	hypothetical protein TGME49_233950	675	8	0	95.86						no IPS match	no IPS match	no IPS match	ENOG		0	Sarcocystidae		0
TGME49_233960	[INTERPRO, BLASTED, MAPPED, ANNOTATED]	hypothetical protein TGPRC2_233960A, partial	3149	15	0	93.15	3	P:GO:0045944; F:GO:0002039; C:GO:0005669	P:positive regulation of transcription by RNA polymerase II; F:p53 binding; C:transcription factor TFIID complex			IPR050899 (PANTHER)	no GO terms	no GO terms	ENOG		0	Sarcocystidae		0
TGME49_234060	[INTERPRO, BLASTED]	hypothetical protein TGRH88_037590	237	20	1.68058e-38	99.75						no IPS match	no IPS match	no IPS match	ENOG	heart development	3.4e-36	Sarcocystidae		0
TGME49_234165	[INTERPRO, BLASTED]	hypothetical protein TGME49_234165	1112	20	0	88.62						no IPS match	no IPS match	no IPS match	ENOG		0	Sarcocystidae		0
TGME49_234180	[INTERPRO, BLASTED]	hypothetical protein TGME49_234180	225	6	2.29711e-121	87.4						no IPS match	no IPS match	no IPS match	ENOG		3.5e-123	Sarcocystidae		0
TGME49_234200	[INTERPRO, BLASTED]	hypothetical protein TGME49_234200	938	14	0	90.7						no IPS match	no IPS match	no IPS match	ENOG		0	Sarcocystidae		0
TGME49_234220	[INTERPRO, BLASTED, MAPPED, ANNOTATED]	putative serine/threonine protein phosphatase, related protein	1072	20	0	82.36	1	C:GO:0016020	C:membrane			no IPS match	no IPS match	no IPS match	ENOG	Erythrocyte membrane-associated	0	Sarcocystidae		0
TGME49_234230	[INTERPRO, BLASTED]	hypothetical protein TGGT1_234230	4628	19	0	89.47						PTHR34491 (PANTHER)	no GO terms	no GO terms	ENOG		0	Sarcocystidae		0
TGME49_234270	[INTERPRO, BLASTED]	hypothetical protein TGME49_234270	2214	20	0	93.8						no IPS match	no IPS match	no IPS match	ENOG		0	Sarcocystidae		0
TGME49_234300	[INTERPRO, BLASTED, MAPPED, ANNOTATED]	hypothetical protein TGME49_234300	2752	20	0	93.71	4	P:GO:0031087; F:GO:0003729; C:GO:0000932; C:GO:0005847	P:deadenylation-independent decapping of nuclear-transcribed mRNA; F:mRNA binding; C:P-body; C:mRNA cleavage and polyadenylation specificity factor complex			IPR045152 (PANTHER)	P:GO:0031087; C:GO:0000932	P:deadenylation-independent decapping of nuclear-transcribed mRNA; C:P-body	ENOG		0	Sarcocystidae		0
TGME49_234310	[INTERPRO, BLASTED, MAPPED, ANNOTATED]	casein kinase substrate phosphoprotein PP28	177	19	9.54354e-37	96.03	3	F:GO:0003723; F:GO:0016301; C:GO:0005829	F:RNA binding; F:kinase activity; C:cytosol	EC:2.7	Transferring phosphorus-containing groups	IPR019380 (PFAM); IPR039876 (PANTHER)	F:GO:0003723; C:GO:0005829	F:RNA binding; C:cytosol	KOG,ENOG	Casein kinase substrate phosphoprotein PP28	1.9e-44	Sarcocystidae		0
TGME49_234340	[INTERPRO, BLASTED, MAPPED, ANNOTATED]	putative transmembrane protein	170	6	8.65241e-44	99.16	1	C:GO:0016020	C:membrane			no IPS match	no IPS match	no IPS match
TGME49_234350	[INTERPRO, BLASTED, MAPPED, ANNOTATED]	hydrolase alpha/beta fold protein	797	20	0	82.59	6	P:GO:0044255; F:GO:0052689; C:GO:0005739	P:cellular lipid metabolic process; F:carboxylic ester hydrolase activity; C:mitochondrion	EC:3.1; EC:3; EC:3.1.1	Acting on ester bonds; Hydrolases; Acting on ester bonds	IPR029058 (G3DSA:3.40.50.GENE3D); IPR029058 (G3DSA:3.40.50.GENE3D); IPR029058 (G3DSA:3.40.50.GENE3D); PTHR46118 (PANTHER); IPR029058 (SUPERFAMILY); IPR029058 (SUPERFAMILY)	no GO terms	no GO terms	ENOG		0	Sarcocystidae		0
TGME49_234375	[INTERPRO, BLASTED]	hypothetical protein TGME49_234375	110	1	9.77128e-60	100						no IPS match	no IPS match	no IPS match
TGME49_234390	[INTERPRO, BLASTED]	hypothetical protein TGME49_234390	425	11	0	89.53						no IPS match	no IPS match	no IPS match	ENOG		2.1e-209	Sarcocystidae		0
TGME49_234400	[INTERPRO, BLASTED, MAPPED]	putative transmembrane protein	205	5	6.77346e-151	83	1	C:GO:0016020	C:membrane			no IPS match	no IPS match	no IPS match	ENOG		9.2e-115	Sarcocystidae		0
TGME49_234430	[INTERPRO, BLASTED]	putative AAA family domain ATPase	2969	15	0	86.63						no IPS match	no IPS match	no IPS match	ENOG		0	Sarcocystidae		0
TGME49_234470	[INTERPRO, BLASTED]	hypothetical protein TGME49_234470	437	11	0	89.09						no IPS match	no IPS match	no IPS match	ENOG		1.9e-194	Sarcocystidae		0
TGME49_234507	[INTERPRO, BLASTED]	membrane protein, putative	301	20	0	65.33						no IPS match	no IPS match	no IPS match	ENOG		2e-166	Apicomplexa		0
TGME49_234530	[INTERPRO, BLASTED, MAPPED, ANNOTATED]	putative transmembrane protein	332	20	3.73652e-180	58.04	1	C:GO:0016020	C:membrane			no IPS match	no IPS match	no IPS match	ENOG		4.1e-40	Sarcocystidae		0
TGME49_234540	[INTERPRO, NO-BLAST]	---NA---	614									IPR008521 (PFAM); G3DSA:1.10.3730.20 (GENE3D); IPR008521 (PANTHER); SSF103481 (SUPERFAMILY)	P:GO:0015693; F:GO:0015095; C:GO:0016020	P:magnesium ion transport; F:magnesium ion transmembrane transporter activity; C:membrane	ENOG	Magnesium transporter NIPA	2.1e-303	Sarcocystidae		0
TGME49_234560	[INTERPRO, BLASTED, MAPPED, ANNOTATED]	hypothetical protein TGCAST_234560	1285	20	0	91.76	5	P:GO:0000398; F:GO:0003723; C:GO:0005654; C:GO:0005737; C:GO:0061574	P:mRNA splicing, via spliceosome; F:RNA binding; C:nucleoplasm; C:cytoplasm; C:ASAP complex			no IPS match	no IPS match	no IPS match	ENOG		0	Sarcocystidae		0
TGME49_234590	[INTERPRO, BLASTED, MAPPED, ANNOTATED]	putative transmembrane protein	262	4	4.63143e-173	94.18	1	C:GO:0016020	C:membrane			no IPS match	no IPS match	no IPS match
TGME49_234600	[INTERPRO, BLASTED, MAPPED, ANNOTATED]	RecQ-mediated genome instability protein 1	696	20	0	77.48	4	P:GO:0000712; P:GO:0000724; C:GO:0016604; C:GO:0031422	P:resolution of meiotic recombination intermediates; P:double-strand break repair via homologous recombination; C:nuclear body; C:RecQ family helicase-topoisomerase III complex			IPR042470 (G3DSA:2.40.50.GENE3D); IPR013894 (PFAM); PTHR14790 (PANTHER)	P:GO:0000712; P:GO:0000724; C:GO:0016604; C:GO:0031422	P:resolution of meiotic recombination intermediates; P:double-strand break repair via homologous recombination; C:nuclear body; C:RecQ family helicase-topoisomerase III complex	KOG,ENOG	RecQ mediated genome instability protein	0	Sarcocystidae		0
TGME49_234640	[INTERPRO, BLASTED, MAPPED, ANNOTATED]	Not1 amine-terminal domain, CCR4-NOT complex component	1625	20	0	93.66	6	P:GO:0006355; P:GO:0030036; F:GO:0005488; C:GO:0005634; C:GO:0015629; C:GO:0016020	P:regulation of DNA-templated transcription; P:actin cytoskeleton organization; F:binding; C:nucleus; C:actin cytoskeleton; C:membrane			G3DSA:2.30.30.40 (GENE3D); IPR007207 (PFAM); IPR036028 (SUPERFAMILY)	P:GO:0006355; F:GO:0005515; C:GO:0005634	P:regulation of DNA-templated transcription; F:protein binding; C:nucleus	COG,KOG,ENOG	nuclear-transcribed mRNA catabolic process, deadenylation-dependent decay	0	Sarcocystidae		0
TGME49_234940	[INTERPRO, BLASTED]	hypothetical protein TGME49_234940	372	10	0	94.15						no IPS match	no IPS match	no IPS match	ENOG		3.2e-206	Sarcocystidae		0
TGME49_234980	[INTERPRO, BLASTED, MAPPED, ANNOTATED]	putative transmembrane protein	760	11	0	91.67	1	C:GO:0016020	C:membrane			no IPS match	no IPS match	no IPS match	ENOG		0	Sarcocystidae		0
TGME49_234990	[INTERPRO, BLASTED, MAPPED, ANNOTATED]	hypothetical protein TGME49_234990	1414	13	0	91.24	2	P:GO:0031087; C:GO:0000932	P:deadenylation-independent decapping of nuclear-transcribed mRNA; C:P-body			no IPS match	no IPS match	no IPS match	ENOG		0	Sarcocystidae		0
TGME49_235010	[INTERPRO, BLASTED, MAPPED, ANNOTATED]	putative transmembrane protein	261	5	7.54939e-179	82.65	1	C:GO:0016020	C:membrane			no IPS match	no IPS match	no IPS match	ENOG		6.6e-134	Sarcocystidae		0
TGME49_235160	[INTERPRO, BLASTED]	hypothetical protein TGME49_235160	1547	20	0	98.24						IPR016024 (SUPERFAMILY)	no GO terms	no GO terms	ENOG		0	Sarcocystidae		0
TGME49_235360	[INTERPRO, BLASTED, MAPPED, ANNOTATED]	putative transmembrane protein	183	20	3.63144e-129	75.23	1	C:GO:0016020	C:membrane			no IPS match	no IPS match	no IPS match	ENOG		4e-93	Sarcocystidae		0
TGME49_235398	[INTERPRO, BLASTED]	putative DNA double-strand break repair rad50 ATPase	612	20	0	90.7						no IPS match	no IPS match	no IPS match	ENOG		2.7e-287	Sarcocystidae		0
TGME49_235420	[INTERPRO, BLASTED]	putative collagen protein	4118	20	0	95.53						no IPS match	no IPS match	no IPS match	ENOG	LIM-domain binding protein	0	Apicomplexa		0
TGME49_235430	[INTERPRO, BLASTED]	hypothetical protein TGME49_235430	259	5	2.39744e-147	94.81						no IPS match	no IPS match	no IPS match
TGME49_235560	[INTERPRO, BLASTED]	hypothetical protein TGME49_235560	640	20	0	93.4						no IPS match	no IPS match	no IPS match	ENOG		2.7e-306	Sarcocystidae		0
TGME49_235580	[INTERPRO, BLASTED, MAPPED]	TPA: hypothetical protein BN1205_061800	1500	20	0	64.87	1	C:GO:0016020	C:membrane			no IPS match	no IPS match	no IPS match	ENOG		0	Sarcocystidae		0
TGME49_235590	[INTERPRO, BLASTED]	hypothetical protein TGME49_235590	140	8	3.25361e-99	82.92						no IPS match	no IPS match	no IPS match	ENOG		6.4e-75	Sarcocystidae		0
TGME49_235630	[INTERPRO, BLASTED]	putative transmembrane protein	400	20	7.60127e-118	89.91						no IPS match	no IPS match	no IPS match	ENOG		7.2e-63	Sarcocystidae		0
TGME49_235635	[INTERPRO, BLASTED]	putative transmembrane protein	454	15	0	94.99						no IPS match	no IPS match	no IPS match	ENOG		1.1e-11	Sarcocystidae		0
TGME49_235670	[INTERPRO, BLASTED]	Chromosome III, complete sequence, related	558	20	0	89.11						no IPS match	no IPS match	no IPS match	ENOG	Encoded by	6.9e-306	Sarcocystidae		0
TGME49_235710	[INTERPRO, BLASTED, MAPPED, ANNOTATED]	hypothetical protein TGME49_235710	212	10	4.38263e-72	89.67	3	P:GO:0001682; F:GO:0004526; C:GO:0030677	P:tRNA 5'-leader removal; F:ribonuclease P activity; C:ribonuclease P complex	EC:3.1.30; EC:3.1.26.5	Acting on ester bonds; ribonuclease P	IPR038085 (SUPERFAMILY)	no GO terms	no GO terms	ENOG		1.2e-45	Sarcocystidae		0
TGME49_235720	[INTERPRO, BLASTED, MAPPED, ANNOTATED]	Sodium:neurotransmitter symporter family protein	461	8	3.60329e-162	90.43	3	P:GO:0008033; F:GO:0046872; C:GO:0005655	P:tRNA processing; F:metal ion binding; C:nucleolar ribonuclease P complex			G3DSA:6.20.50.20 (GENE3D); IPR007175 (PFAM); PTHR14742 (PANTHER)	P:GO:0006396; P:GO:0008033; C:GO:0005655	P:RNA processing; P:tRNA processing; C:nucleolar ribonuclease P complex	ENOG	RNAse P Rpr2/Rpp21/SNM1 subunit domain	2.6e-189	Sarcocystidae		0
TGME49_235730	[INTERPRO, BLASTED, MAPPED]	hypothetical protein TGME49_235730	343	20	1.05567e-139	64.06	1	C:GO:0016020	C:membrane			no IPS match	no IPS match	no IPS match	ENOG		2.1e-79	Sarcocystidae		0
TGME49_235740	[INTERPRO, BLASTED, MAPPED, ANNOTATED]	putative IMP dehydrogenase/GMP reductase domain protein	492	20	0	89.89	1	C:GO:0016020	C:membrane			G3DSA:2.60.200.20 (GENE3D); IPR028124 (PFAM); PTHR22426 (PANTHER); IPR000253 (PROSITE_PROFILES); cd00060 (CDD); IPR008984 (SUPERFAMILY)	F:GO:0005515	F:protein binding	ENOG	IMP dehydrogenase GMP reductase domain containing protein	1.3e-178	Sarcocystidae		0
TGME49_235960	[INTERPRO, BLASTED, MAPPED, ANNOTATED]	putative methyltransferase	623	20	0	80.3	6	P:GO:0032259; F:GO:0016279; C:GO:0005829	P:methylation; F:protein-lysine N-methyltransferase activity; C:cytosol	EC:2.1; EC:2; EC:2.1.1	Transferring one-carbon groups; Transferases; Transferring one-carbon groups	IPR019410 (PFAM); IPR029063 (G3DSA:3.40.50.GENE3D); IPR019410 (PANTHER); PS51257 (PROSITE_PROFILES)	no GO terms	no GO terms	ENOG	Lysine methyltransferase	9.8e-293	Sarcocystidae		0
TGME49_235990	[INTERPRO, BLASTED, MAPPED, ANNOTATED]	MA3 domain protein	1244	20	0	96.82	3	P:GO:0042274; F:GO:0003723; C:GO:0005730	P:ribosomal small subunit biogenesis; F:RNA binding; C:nucleolus			G3DSA:1.25.40.180 (GENE3D); IPR016024 (SUPERFAMILY)	no GO terms	no GO terms	KOG,ENOG	hair follicle maturation	0	Sarcocystidae		0			K17583
TGME49_236030	[INTERPRO, BLASTED, MAPPED, ANNOTATED]	putative DUF775 domain protein	179	20	1.19087e-127	71.04	5	P:GO:0006606; F:GO:0030544; F:GO:0061608; C:GO:0005634; C:GO:0005829	P:protein import into nucleus; F:Hsp70 protein binding; F:nuclear import signal receptor activity; C:nucleus; C:cytosol			IPR048364 (PFAM); IPR008493 (PFAM); IPR031318 (PANTHER)	P:GO:0006606; F:GO:0061608; C:GO:0005634; C:GO:0005829	P:protein import into nucleus; F:nuclear import signal receptor activity; C:nucleus; C:cytosol	KOG,ENOG	Protein of unknown function (DUF775)	1.9e-100	Sarcocystidae		0
TGME49_236060	[INTERPRO, BLASTED]	hypothetical protein TGME49_236060	507	11	0	91.91						no IPS match	no IPS match	no IPS match	ENOG		5.1e-231	Sarcocystidae		0
TGME49_236120	[INTERPRO, BLASTED]	putative transmembrane protein	298	13	2.62914e-155	90.91						no IPS match	no IPS match	no IPS match	ENOG		1.9e-129	Sarcocystidae		0
TGME49_236140	[INTERPRO, BLASTED]	putative signal recognition particle domain protein	1057	15	0	88.06						IPR027417 (G3DSA:3.40.50.GENE3D); IPR027417 (SUPERFAMILY)	no GO terms	no GO terms	ENOG		0	Sarcocystidae		0
TGME49_236150	[INTERPRO, BLASTED]	hypothetical protein TGME49_236150	126	5	3.2216e-72	98.25						no IPS match	no IPS match	no IPS match
TGME49_236160	[INTERPRO, BLASTED, MAPPED, ANNOTATED]	putative transmembrane protein	760	20	0	94.27	1	C:GO:0016020	C:membrane			no IPS match	no IPS match	no IPS match	ENOG		3.8e-283	Sarcocystidae		0
TGME49_236190	[INTERPRO, BLASTED]	putative transmembrane protein	306	8	3.17623e-94	95.44						no IPS match	no IPS match	no IPS match	ENOG		3e-117	Sarcocystidae		0
TGME49_236230	[INTERPRO, BLASTED]	hypothetical protein TGME49_236230	170	7	1.20219e-107	99.5						no IPS match	no IPS match	no IPS match
TGME49_236280	[INTERPRO, BLASTED, MAPPED]	Chromosome I, complete genome, related	485	20	0	82.46	2	P:GO:0006352; F:GO:0003677	P:DNA-templated transcription initiation; F:DNA binding			SSF55945 (SUPERFAMILY); SSF55945 (SUPERFAMILY)	no GO terms	no GO terms	ENOG		1.5e-216	Sarcocystidae		0
TGME49_236290	[INTERPRO, BLASTED, MAPPED, ANNOTATED]	putative transmembrane protein	306	20	6.23464e-178	89.31	1	C:GO:0016020	C:membrane			no IPS match	no IPS match	no IPS match	ENOG		1.5e-84	Sarcocystidae		0
TGME49_236400	[INTERPRO, BLASTED, MAPPED, ANNOTATED]	putative transmembrane protein	359	20	0	91.45	1	C:GO:0016020	C:membrane			no IPS match	no IPS match	no IPS match	ENOG		9.3e-155	Sarcocystidae		0
TGME49_236520	[INTERPRO, BLASTED]	hypothetical protein TGME49_236520	302	20	0	81.36						no IPS match	no IPS match	no IPS match	ENOG		3.6e-168	Sarcocystidae		0
TGME49_236550	[INTERPRO, BLASTED, MAPPED, ANNOTATED]	putative transmembrane protein	165	20	2.36675e-106	67.39	3	P:GO:0009987; F:GO:0003824; C:GO:0016020	P:cellular process; F:catalytic activity; C:membrane			no IPS match	no IPS match	no IPS match	ENOG		9.7e-91	Sarcocystidae		0
TGME49_236560	[INTERPRO, BLASTED]	hypothetical protein TGME49_236560	2482	16	0	90.23						no IPS match	no IPS match	no IPS match	ENOG		0	Sarcocystidae		0
TGME49_236630	[INTERPRO, BLASTED, MAPPED, ANNOTATED]	putative transmembrane protein	360	6	0	94.95	1	C:GO:0016020	C:membrane			no IPS match	no IPS match	no IPS match	ENOG		1.4e-211	Sarcocystidae		0
TGME49_236635	[INTERPRO, BLASTED]	hypothetical protein TGME49_236635	168	1	5.27634e-102	100						no IPS match	no IPS match	no IPS match
TGME49_236670	[INTERPRO, BLASTED, MAPPED, ANNOTATED]	putative transmembrane protein	918	20	0	94.37	1	C:GO:0016020	C:membrane			PR01217 (PRINTS)	no GO terms	no GO terms	ENOG		3e-197	Sarcocystidae		0
TGME49_236790	[INTERPRO, BLASTED]	iq calmodulin-binding motif family	548	18	7.26313e-170	96.52						no IPS match	no IPS match	no IPS match	ENOG		3.6e-166	Sarcocystidae		0
TGME49_236800	[INTERPRO, BLASTED]	hypothetical protein TGME49_236800	475	20	0	80.82						no IPS match	no IPS match	no IPS match	ENOG		7.9e-202	Sarcocystidae		0
TGME49_236820	[INTERPRO, BLASTED]	hypothetical protein TGME49_236820	475	20	0	76.96						no IPS match	no IPS match	no IPS match	ENOG		2e-141	Sarcocystidae		0
TGME49_236830	[INTERPRO, BLASTED]	hypothetical protein TGME49_236830	163	6	3.60364e-77	99.64						no IPS match	no IPS match	no IPS match
TGME49_236850	[INTERPRO, BLASTED, MAPPED]	A C2HC-type zinc-finger protein	2752	18	0	90.91	1	F:GO:0046872	F:metal ion binding			PF13913 (PFAM)	no GO terms	no GO terms	ENOG	zinc-finger of a C2HC-type	0	Sarcocystidae		0
TGME49_236880	[INTERPRO, BLASTED]	hypothetical protein TGME49_236880	217	5	2.42159e-157	99.82						no IPS match	no IPS match	no IPS match
TGME49_236900	[INTERPRO, BLASTED, MAPPED, ANNOTATED]	putative transmembrane protein	210	12	1.49656e-131	79.89	1	C:GO:0016020	C:membrane			no IPS match	no IPS match	no IPS match	ENOG		8.6e-100	Sarcocystidae		0
TGME49_236920	[INTERPRO, BLASTED, MAPPED, ANNOTATED]	DSS1/SEM1 family protein	111	4	1.10857e-36	87.82	3	P:GO:0006406; P:GO:0043248; C:GO:0008541	P:mRNA export from nucleus; P:proteasome assembly; C:proteasome regulatory particle, lid subcomplex			no IPS match	no IPS match	no IPS match	ENOG	DSS1_SEM1	4.2e-53	Sarcocystidae		0			K10881	map03050,map03440,map05169
TGME49_236930	[INTERPRO, BLASTED]	TPA: hypothetical protein BN1205_060300	6023	18	0	86.55						IPR051352 (PANTHER)	no GO terms	no GO terms	ENOG		0	Sarcocystidae		0
TGME49_236940	[INTERPRO, BLASTED, MAPPED]	hypothetical protein TGME49_236940	176	20	2.35445e-127	63.47	4	P:GO:0006364; P:GO:0045943; C:GO:0005634; C:GO:0005730	P:rRNA processing; P:positive regulation of transcription by RNA polymerase I; C:nucleus; C:nucleolus			no IPS match	no IPS match	no IPS match	ENOG		7e-95	Sarcocystidae		0
TGME49_236950	[INTERPRO, BLASTED]	hypothetical protein TGME49_236950	112	4	1.26043e-77	86.67						no IPS match	no IPS match	no IPS match	ENOG		2.1e-57	Sarcocystidae		0
TGME49_237045	[INTERPRO, BLASTED, MAPPED, ANNOTATED]	ws dgat mgat	2178	20	0	71.25	5	P:GO:0001666; P:GO:0019432; P:GO:0071731; F:GO:0008374; C:GO:0005886	P:response to hypoxia; P:triglyceride biosynthetic process; P:response to nitric oxide; F:O-acyltransferase activity; C:plasma membrane	EC:2.3.1	Acyltransferases	IPR009721 (PFAM); IPR045034 (PANTHER)	P:GO:0019432; P:GO:0045017; F:GO:0008374; C:GO:0005886	P:triglyceride biosynthetic process; P:glycerolipid biosynthetic process; F:O-acyltransferase activity; C:plasma membrane	ENOG	Protein of unknown function (DUF1298)	0	Sarcocystidae		0
TGME49_237070	[INTERPRO, BLASTED]	hypothetical protein TGME49_237070	264	4	4.89363e-129	91.87						no IPS match	no IPS match	no IPS match	ENOG		4.1e-83	Sarcocystidae		0
TGME49_237080	[INTERPRO, BLASTED]	hypothetical protein TGCOUG_237080	388	6	4.16395e-174	86.9						no IPS match	no IPS match	no IPS match	ENOG		9.5e-121	Sarcocystidae		0
TGME49_237120	[INTERPRO, BLASTED, MAPPED, ANNOTATED]	cytochrome c oxidase subunit iii subfamily protein	164	20	2.98334e-98	97.82	9	P:GO:0006122; P:GO:0006123; P:GO:0015990; F:GO:0004129; F:GO:0008121; F:GO:0020037; F:GO:0046872; C:GO:0005750; C:GO:0005751	P:mitochondrial electron transport, ubiquinol to cytochrome c; P:mitochondrial electron transport, cytochrome c to oxygen; P:electron transport coupled proton transport; F:cytochrome-c oxidase activity; F:ubiquinol-cytochrome-c reductase activity; F:heme binding; F:metal ion binding; C:mitochondrial respiratory chain complex III; C:mitochondrial respiratory chain complex IV	EC:1.10; EC:1.9; EC:7.1.1.9; EC:7.1.1.8	Acting on diphenols and related substances as donors; Acting on a heme group of donors; cytochrome-c oxidase; quinol--cytochrome-c reductase	IPR013833 (G3DSA:1.20.120.GENE3D); IPR035973 (SUPERFAMILY)	P:GO:0022904; F:GO:0004129; F:GO:0009055; C:GO:0016020	P:respiratory electron transport chain; F:cytochrome-c oxidase activity; F:electron transfer activity; C:membrane	ENOG		3.3e-83	Eukaryota		0
TGME49_237160	[INTERPRO, BLASTED]	hypothetical protein TGME49_237160	1709	20	0	94.12						no IPS match	no IPS match	no IPS match	ENOG		0	Sarcocystidae		0
TGME49_237170	[INTERPRO, BLASTED, MAPPED, ANNOTATED]	hypothetical protein TGME49_237170	838	20	0	66.25	1	P:GO:0071027	P:nuclear RNA surveillance			no IPS match	no IPS match	no IPS match	ENOG		0	Sarcocystidae		0
TGME49_237180	[INTERPRO, BLASTED]	hypothetical protein TGME49_237180	255	10	2.21473e-133	78.87						no IPS match	no IPS match	no IPS match	ENOG		8.8e-115	Sarcocystidae		0
TGME49_237190	[INTERPRO, BLASTED]	hypothetical protein TGME49_237190	200	8	4.03636e-146	84.75						no IPS match	no IPS match	no IPS match	ENOG		3.5e-103	Sarcocystidae		0
TGME49_237195	[INTERPRO, BLASTED]	hypothetical protein TGME49_237195	1005	15	0	88.96						no IPS match	no IPS match	no IPS match	ENOG		0	Sarcocystidae		0
TGME49_237250	[INTERPRO, BLASTED, MAPPED, ANNOTATED]	emp24/gp25L/p24 family protein	259	20	3.60713e-169	75.91	9	P:GO:0006621; P:GO:0006886; P:GO:0006888; P:GO:0007030; C:GO:0005783; C:GO:0005793; C:GO:0005794; C:GO:0016020; C:GO:0030134	P:protein retention in ER lumen; P:intracellular protein transport; P:endoplasmic reticulum to Golgi vesicle-mediated transport; P:Golgi organization; C:endoplasmic reticulum; C:endoplasmic reticulum-Golgi intermediate compartment; C:Golgi apparatus; C:membrane; C:COPII-coated ER to Golgi transport vesicle			IPR009038 (PFAM); IPR015720 (PANTHER); IPR009038 (PROSITE_PROFILES)	P:GO:0006886; P:GO:0006888; P:GO:0007030; C:GO:0005783; C:GO:0005793; C:GO:0005794; C:GO:0030134	P:intracellular protein transport; P:endoplasmic reticulum to Golgi vesicle-mediated transport; P:Golgi organization; C:endoplasmic reticulum; C:endoplasmic reticulum-Golgi intermediate compartment; C:Golgi apparatus; C:COPII-coated ER to Golgi transport vesicle	KOG,ENOG	emp24/gp25L/p24 family/GOLD	5.9e-143	Sarcocystidae		0			K20347
TGME49_237270	[INTERPRO, BLASTED]	hypothetical protein TGME49_237270	195	7	9.64714e-138	99.34						no IPS match	no IPS match	no IPS match	ENOG		4.3e-53	Sarcocystidae		0
TGME49_237290	[INTERPRO, BLASTED]	putative transmembrane protein	2115	20	0	96.61						IPR032675 (G3DSA:3.80.10.GENE3D); SSF52047 (SUPERFAMILY)	no GO terms	no GO terms	ENOG		0	Sarcocystidae		0
TGME49_237510	[INTERPRO, BLASTED, MAPPED, ANNOTATED]	serine threonine protein kinase	2056	20	0	85.98	3	P:GO:0006355; F:GO:0016301; C:GO:0140513	P:regulation of DNA-templated transcription; F:kinase activity; C:nuclear protein-containing complex	EC:2.7	Transferring phosphorus-containing groups	IPR011009 (SUPERFAMILY)	no GO terms	no GO terms	ENOG		0	Sarcocystidae		0
TGME49_237530	[INTERPRO, BLASTED, MAPPED, ANNOTATED]	hypothetical protein TGME49_237530	1004	19	0	82.06	7	P:GO:0000963; P:GO:0044528; P:GO:1901259; F:GO:0003723; C:GO:0005759; C:GO:0009507; C:GO:0035770	P:mitochondrial RNA processing; P:regulation of mitochondrial mRNA stability; P:chloroplast rRNA processing; F:RNA binding; C:mitochondrial matrix; C:chloroplast; C:ribonucleoprotein granule			no IPS match	no IPS match	no IPS match	ENOG		0	Sarcocystidae		0
TGME49_237585	[INTERPRO, BLASTED, MAPPED, ANNOTATED]	putative transmembrane protein	1253	20	0	75.19	1	C:GO:0016020	C:membrane			IPR000884 (PROSITE_PROFILES)	no GO terms	no GO terms	ENOG		0	Sarcocystidae		0
TGME49_237595	[INTERPRO, BLASTED]	hypothetical protein TGME49_237595	138	6	3.3771e-98	98.18						no IPS match	no IPS match	no IPS match
TGME49_237810	[INTERPRO, BLASTED]	hypothetical protein TGME49_237810	185	9	6.10413e-118	99.1						no IPS match	no IPS match	no IPS match	ENOG		8.4e-91	Sarcocystidae		0
TGME49_237835	[INTERPRO, BLASTED]	hypothetical protein TGME49_237835	101	5	3.62956e-69	99.02						no IPS match	no IPS match	no IPS match
TGME49_237840	[INTERPRO, BLASTED]	hypothetical protein TGME49_237840	1083	14	0	91.71						no IPS match	no IPS match	no IPS match	ENOG		0	Sarcocystidae		0
TGME49_237893	[INTERPRO, BLASTED, MAPPED, ANNOTATED]	OTU family cysteine protease	230	20	1.46779e-139	90.12	2	P:GO:0006508; F:GO:0004843	P:proteolysis; F:cysteine-type deubiquitinase activity	EC:3.4.19.12	ubiquitinyl hydrolase 1	no IPS match	no IPS match	no IPS match	ENOG		1.2e-99	Sarcocystidae		0
TGME49_238020	[INTERPRO, BLASTED]	hypothetical protein TGME49_238020	711	9	0	85.12						no IPS match	no IPS match	no IPS match	ENOG		8.8e-298	Sarcocystidae		0
TGME49_238150	[INTERPRO, BLASTED, MAPPED, ANNOTATED]	putative transmembrane protein	349	11	0	65.16	1	C:GO:0016020	C:membrane			no IPS match	no IPS match	no IPS match	ENOG		1.3e-185	Sarcocystidae		0
TGME49_238160	[INTERPRO, BLASTED, MAPPED, ANNOTATED]	putative transmembrane protein	371	10	0	76.69	1	C:GO:0016020	C:membrane			PS51257 (PROSITE_PROFILES)	no GO terms	no GO terms	ENOG		9.6e-187	Sarcocystidae		0
TGME49_238165	[INTERPRO, BLASTED]	hypothetical protein TGME49_238165	101	6	6.27748e-66	98.84						no IPS match	no IPS match	no IPS match
TGME49_238260	[INTERPRO, BLASTED]	TPA: hypothetical protein BN1205_036120	377	11	0	94.42						no IPS match	no IPS match	no IPS match	ENOG		3.5e-221	Sarcocystidae		0
TGME49_238270	[INTERPRO, BLASTED, MAPPED, ANNOTATED]	Microtubule-binding protein MIP-T3 C-terminal region	219	20	1.76791e-80	60.91	1	C:GO:0005856	C:cytoskeleton			IPR041476 (PFAM); IPR018799 (PANTHER)	P:GO:0042073; P:GO:0060271; P:GO:0070507; F:GO:0008017; C:GO:0005813; C:GO:0005930; C:GO:0030992; C:GO:0036064	P:intraciliary transport; P:cilium assembly; P:regulation of microtubule cytoskeleton organization; F:microtubule binding; C:centrosome; C:axoneme; C:intraciliary transport particle B; C:ciliary basal body	ENOG		2e-51	Sarcocystidae		0
TGME49_238380	[INTERPRO, BLASTED, MAPPED]	hypothetical protein TGME49_238380	880	16	0	83.01	3	F:GO:0001540; C:GO:0005737; C:GO:0005886	F:amyloid-beta binding; C:cytoplasm; C:plasma membrane			no IPS match	no IPS match	no IPS match	ENOG		0	Sarcocystidae		0
TGME49_238410	[INTERPRO, BLASTED, MAPPED, ANNOTATED]	TPA: hypothetical protein BN1205_036180	1774	16	0	90.41	1	F:GO:0046872	F:metal ion binding			no IPS match	no IPS match	no IPS match	ENOG		2.5e-261	Sarcocystidae		0
TGME49_238420	[INTERPRO, BLASTED]	hypothetical protein TGME49_238420	1577	15	0	91.18						no IPS match	no IPS match	no IPS match	ENOG		0	Sarcocystidae		0
TGME49_238450	[INTERPRO, BLASTED]	hypothetical protein TGME49_238450	176	3	7.66904e-129	98.82						no IPS match	no IPS match	no IPS match
TGME49_238505	[INTERPRO, BLASTED, MAPPED, ANNOTATED]	putative transmembrane protein	159	7	1.87813e-114	94.35	1	C:GO:0016020	C:membrane			no IPS match	no IPS match	no IPS match
TGME49_238860	[INTERPRO, BLASTED]	hypothetical protein TGME49_238860	122	7	7.49396e-86	95.68						no IPS match	no IPS match	no IPS match
TGME49_238870	[INTERPRO, BLASTED]	hypothetical protein TGME49_238870	450	9	0	91.31						no IPS match	no IPS match	no IPS match	ENOG		1.2e-236	Sarcocystidae		0
TGME49_238880	[INTERPRO, BLASTED, MAPPED, ANNOTATED]	RNA polymerase I specific transcription initiation factor RRN3	3150	20	0	96.11	6	P:GO:0006361; P:GO:0006413; F:GO:0001042; F:GO:0001181; F:GO:0003743; C:GO:0005634	P:transcription initiation at RNA polymerase I promoter; P:translational initiation; F:RNA polymerase I core binding; F:RNA polymerase I general transcription initiation factor activity; F:translation initiation factor activity; C:nucleus			IPR007991 (PFAM); G3DSA:3.10.450.40 (GENE3D); PF11523 (PFAM); IPR007991 (PANTHER)	P:GO:0006361; F:GO:0001181	P:transcription initiation at RNA polymerase I promoter; F:RNA polymerase I general transcription initiation factor activity	ENOG	RNA polymerase I specific transcription initiation factor RRN3	0	Sarcocystidae		0			K15216
TGME49_238915	[INTERPRO, BLASTED, MAPPED, ANNOTATED]	hypothetical protein TGME49_238915	1056	19	0	79.26	1	P:GO:0071027	P:nuclear RNA surveillance			no IPS match	no IPS match	no IPS match	ENOG		0	Sarcocystidae		0
TGME49_238930	[INTERPRO, BLASTED, MAPPED, ANNOTATED]	hypothetical protein TGME49_238930	1591	15	0	89.2	4	F:GO:0008276; C:GO:0005634	F:protein methyltransferase activity; C:nucleus	EC:2.1; EC:2; EC:2.1.1	Transferring one-carbon groups; Transferases; Transferring one-carbon groups	no IPS match	no IPS match	no IPS match	ENOG		0	Sarcocystidae		0
TGME49_238970	[INTERPRO, BLASTED]	putative glutamic acid-rich protein	3699	20	0	95.43						PTHR47771 (PANTHER)	no GO terms	no GO terms	ENOG		0	Sarcocystidae		0
TGME49_238980	[INTERPRO, BLASTED, MAPPED, ANNOTATED]	TPA: retinitis pigmentosa GTPase regulator, putative	1556	15	0	91.37	1	C:GO:0016020	C:membrane			no IPS match	no IPS match	no IPS match	ENOG		0	Sarcocystidae		0
TGME49_239050	[INTERPRO, BLASTED]	hypothetical protein TGME49_239050	1182	20	0	96.39						no IPS match	no IPS match	no IPS match	ENOG		0	Sarcocystidae		0
TGME49_239083	[INTERPRO, BLASTED]	hypothetical protein TGME49_239083	124	4	9.75785e-69	98.94						no IPS match	no IPS match	no IPS match
TGME49_239087	[INTERPRO, BLASTED]	hypothetical protein TGME49_239087	150	7	5.59197e-95	93.52						no IPS match	no IPS match	no IPS match	ENOG		2.5e-77	Sarcocystidae		0
TGME49_239270	[INTERPRO, BLASTED]	TPA: Probable cell surface glycoprotein, related	1620	18	0	92.21						no IPS match	no IPS match	no IPS match	ENOG		0	Sarcocystidae		0
TGME49_239290	[INTERPRO, BLASTED]	TPA: hypothetical protein BN1205_092320	1786	12	0	91.71						no IPS match	no IPS match	no IPS match	ENOG		0	Sarcocystidae		0
TGME49_239365	[INTERPRO, BLASTED]	TPA: SDRF_STAEP Serine-aspartate repeat-conta	791	18	0	95.69						no IPS match	no IPS match	no IPS match	ENOG		5.2e-150	Sarcocystidae		0
TGME49_239475	[INTERPRO, BLASTED, MAPPED, ANNOTATED]	putative flagellar protein	2114	20	0	97.53	3	P:GO:0007288; C:GO:0002177; C:GO:0097225	P:sperm axoneme assembly; C:manchette; C:sperm midpiece			PF22946 (PFAM); IPR027417 (G3DSA:3.40.50.GENE3D); IPR036872 (G3DSA:1.10.418.GENE3D); IPR010441 (PFAM); IPR052634 (PANTHER); IPR027417 (SUPERFAMILY)	no GO terms	no GO terms	ENOG		0	Sarcocystidae		0
TGME49_239520	[INTERPRO, BLASTED, MAPPED, ANNOTATED]	putative serine:pyruvate/alanine:glyoxylate aminotransferase	797	11	0	88.63	2	F:GO:0008483	F:transaminase activity	EC:2.6.1; EC:2; EC:2.6	Transferring nitrogenous groups; Transferases; Transferring nitrogenous groups	no IPS match	no IPS match	no IPS match	ENOG		0	Sarcocystidae		0
TGME49_239570	[INTERPRO, BLASTED]	hypothetical protein TGME49_239570	556	12	0	83.98						no IPS match	no IPS match	no IPS match	ENOG		1.3e-251	Sarcocystidae		0
TGME49_239580	[INTERPRO, BLASTED]	hypothetical protein TGPRC2_239580	2225	12	0	90.93						no IPS match	no IPS match	no IPS match	ENOG		0	Sarcocystidae		0
TGME49_239610	[INTERPRO, BLASTED, MAPPED, ANNOTATED]	putative transmembrane protein	612	10	0	88.13	1	C:GO:0016020	C:membrane			PS51257 (PROSITE_PROFILES)	no GO terms	no GO terms	ENOG		0	Sarcocystidae		0
TGME49_239640	[INTERPRO, BLASTED, MAPPED, ANNOTATED]	putative transmembrane protein	151	5	1.76061e-96	93.1	1	C:GO:0016020	C:membrane			no IPS match	no IPS match	no IPS match	ENOG		6e-63	Sarcocystidae		0
TGME49_239650	[INTERPRO, BLASTED]	hypothetical protein TGME49_239650	409	11	0	90.55						no IPS match	no IPS match	no IPS match	ENOG		2e-198	Sarcocystidae		0
TGME49_239660	[INTERPRO, BLASTED]	hypothetical protein TGME49_239660	272	8	0	97.88						no IPS match	no IPS match	no IPS match	ENOG		3e-129	Sarcocystidae		0
TGME49_239670	[INTERPRO, BLASTED]	hypothetical protein TGME49_239670	956	20	0	80.88						no IPS match	no IPS match	no IPS match	ENOG		0	Sarcocystidae		0
TGME49_239680	[INTERPRO, BLASTED, MAPPED]	putative transmembrane protein	601	20	0	71.04	4	F:GO:0016787; F:GO:0016810; C:GO:0016020; C:GO:0020011	F:hydrolase activity; F:hydrolase activity, acting on carbon-nitrogen (but not peptide) bonds; C:membrane; C:apicoplast			no IPS match	no IPS match	no IPS match	ENOG		9.4e-301	Sarcocystidae		0
TGME49_239748	[INTERPRO, BLASTED, MAPPED, ANNOTATED]	putative galactosyltransferase	441	20	0	74.11	6	P:GO:0006506; F:GO:0016757; C:GO:0000506	P:GPI anchor biosynthetic process; F:glycosyltransferase activity; C:glycosylphosphatidylinositol-N-acetylglucosaminyltransferase (GPI-GnT) complex	EC:2.4; EC:2	Glycosyltransferases; Transferases	IPR019328 (PFAM); IPR044215 (PANTHER)	P:GO:0006506; C:GO:0000506	P:GPI anchor biosynthetic process; C:glycosylphosphatidylinositol-N-acetylglucosaminyltransferase (GPI-GnT) complex	KOG,ENOG	Fringe-like	2e-228	Sarcocystidae		0
TGME49_239752	[INTERPRO, BLASTED, MAPPED, ANNOTATED]	Galactosyltransferase, related, related	905	20	0	71.86	10	P:GO:0006506; F:GO:0000166; F:GO:0008375; F:GO:0016263; C:GO:0000506	P:GPI anchor biosynthetic process; F:nucleotide binding; F:acetylglucosaminyltransferase activity; F:glycoprotein-N-acetylgalactosamine 3-beta-galactosyltransferase activity; C:glycosylphosphatidylinositol-N-acetylglucosaminyltransferase (GPI-GnT) complex	EC:2.4; EC:2; EC:2.4.1.122; EC:2.4.1	Glycosyltransferases; Transferases; N-acetylgalactosaminide beta-1,3-galactosyltransferase; Glycosyltransferases	G3DSA:3.90.550.50 (GENE3D); IPR003378 (PFAM); G3DSA:3.90.550.50 (GENE3D); PIRSR038073-3 (PIRSR); PTHR10811 (PANTHER)	F:GO:0008375; F:GO:0016757; C:GO:0016020	F:acetylglucosaminyltransferase activity; F:glycosyltransferase activity; C:membrane	KOG,ENOG	Fringe-like	0	Sarcocystidae		0
TGME49_239755	[INTERPRO, BLASTED, MAPPED, ANNOTATED]	putative membrane protein	339	20	0	58.83	1	C:GO:0016020	C:membrane			no IPS match	no IPS match	no IPS match	ENOG	Encoded by	3.7e-193	Sarcocystidae		0
TGME49_239780	[INTERPRO, BLASTED, MAPPED, ANNOTATED]	putative transmembrane protein	411	10	0	91.73	1	C:GO:0016020	C:membrane			no IPS match	no IPS match	no IPS match	ENOG		1.2e-219	Sarcocystidae		0
TGME49_239795	[INTERPRO, BLASTED]	hypothetical protein TGGT1_239795	460	6	0	99.04						no IPS match	no IPS match	no IPS match
TGME49_239810	[INTERPRO, BLASTED]	TPA: hypothetical protein BN1205_091760	1599	12	0	88.77						no IPS match	no IPS match	no IPS match	ENOG		0	Sarcocystidae		0
TGME49_239880	[INTERPRO, BLASTED]	putative transmembrane protein	1261	12	0	86.75						no IPS match	no IPS match	no IPS match	ENOG		0	Sarcocystidae		0
TGME49_240050	[INTERPRO, BLASTED, MAPPED, ANNOTATED]	hypothetical protein TGME49_240050	1890	20	0	98.93	1	C:GO:0005634	C:nucleus			no IPS match	no IPS match	no IPS match	ENOG		0	Sarcocystidae		0
TGME49_240200	[INTERPRO, BLASTED, MAPPED]	hypothetical protein TGME49_240200	468	10	0	88.99	8	P:GO:0044773; P:GO:0051598; F:GO:0004672; F:GO:0004674; F:GO:0005524; C:GO:0005634; C:GO:0005737; C:GO:0016020	P:mitotic DNA damage checkpoint signaling; P:meiotic recombination checkpoint signaling; F:protein kinase activity; F:protein serine/threonine kinase activity; F:ATP binding; C:nucleus; C:cytoplasm; C:membrane			no IPS match	no IPS match	no IPS match	ENOG		9.6e-160	Sarcocystidae		0
TGME49_240230	[INTERPRO, BLASTED]	hypothetical protein TGME49_240230	260	5	6.03604e-170	80.36						no IPS match	no IPS match	no IPS match	ENOG		5e-134	Sarcocystidae		0
TGME49_240243	[INTERPRO, BLASTED, MAPPED, ANNOTATED]	putative transmembrane protein	383	15	0	90.36	1	C:GO:0016020	C:membrane			no IPS match	no IPS match	no IPS match	ENOG		2.4e-172	Apicomplexa		0
TGME49_240255	[INTERPRO, BLASTED, MAPPED, ANNOTATED]	putative transmembrane protein	226	13	6.51605e-103	83.65	1	C:GO:0016020	C:membrane			no IPS match	no IPS match	no IPS match	ENOG		2.9e-05	Haemosporida		0
TGME49_240260	[INTERPRO, BLASTED, MAPPED]	spry domain-containing protein 7-like	150	16	1.0978e-107	88.6	1	C:GO:0016020	C:membrane			no IPS match	no IPS match	no IPS match	ENOG		8e-84	Sarcocystidae		0
TGME49_240270	[INTERPRO, BLASTED, MAPPED]	hypothetical protein TGME49_240270	88	19	2.84216e-41	76.84	7	P:GO:0006260; P:GO:0006355; P:GO:0045893; F:GO:0003677; F:GO:0003700; C:GO:0005634; C:GO:0016020	P:DNA replication; P:regulation of DNA-templated transcription; P:positive regulation of DNA-templated transcription; F:DNA binding; F:DNA-binding transcription factor activity; C:nucleus; C:membrane			no IPS match	no IPS match	no IPS match	ENOG		4.3e-45	Sarcocystidae		0
TGME49_240365	[INTERPRO, BLASTED]	hypothetical protein TGME49_240365	179	6	2.88743e-123	99.44						no IPS match	no IPS match	no IPS match
TGME49_240400	[INTERPRO, BLASTED]	rRNA processing protein	388	10	2.45686e-148	93.94						IPR013730 (PFAM)	no GO terms	no GO terms	ENOG	rRNA processing	2.4e-140	Sarcocystidae		0
TGME49_240440	[INTERPRO, BLASTED, MAPPED, ANNOTATED]	putative transmembrane protein	371	9	0	85.69	1	C:GO:0016020	C:membrane			no IPS match	no IPS match	no IPS match	ENOG		6.6e-180	Sarcocystidae		0
TGME49_240470	[INTERPRO, BLASTED, MAPPED, ANNOTATED]	putative integral membrane protein	409	20	0	74.36	1	C:GO:0016020	C:membrane			no IPS match	no IPS match	no IPS match	ENOG		4.9e-216	Sarcocystidae		0
TGME49_240490	[INTERPRO, BLASTED]	hypothetical protein TGME49_240490	143	2	4.37873e-73	85.11						no IPS match	no IPS match	no IPS match	ENOG		2.4e-69	Sarcocystidae		0
TGME49_240500	[INTERPRO, BLASTED]	PITH domain protein	293	20	0	65.66						IPR037047 (G3DSA:2.60.120.GENE3D); IPR010400 (PFAM); IPR045099 (PANTHER); IPR010400 (PROSITE_PROFILES); IPR008979 (SUPERFAMILY)	no GO terms	no GO terms	KOG,ENOG	PITH domain	2.1e-112	Sarcocystidae		0
TGME49_240520	[INTERPRO, BLASTED, MAPPED, ANNOTATED]	ribosome silencing factor	399	20	0	71.57	2	P:GO:0050794; C:GO:0110165	P:regulation of cellular process; C:cellular anatomical entity			PF02410 (PFAM); IPR043519 (G3DSA:3.30.460.GENE3D); IPR043519 (SUPERFAMILY)	no GO terms	no GO terms	ENOG	Ribosomal silencing factor during starvation	6.6e-234	Sarcocystidae		0
TGME49_240525	[INTERPRO, BLASTED]	hypothetical protein TGME49_240525	552	20	0	59.38						PTHR31789 (PANTHER)	no GO terms	no GO terms	ENOG		4e-306	Coccidia		0
TGME49_240530	[INTERPRO, BLASTED, MAPPED]	membrane protein, putative	301	18	0	62.04	1	F:GO:0005524	F:ATP binding			no IPS match	no IPS match	no IPS match	ENOG		1.1e-132	Sarcocystidae		0
TGME49_240570	[INTERPRO, BLASTED, MAPPED, ANNOTATED]	putative transmembrane protein	495	10	0	85.27	1	C:GO:0016020	C:membrane			no IPS match	no IPS match	no IPS match	ENOG		3.4e-288	Sarcocystidae		0
TGME49_240580	[INTERPRO, BLASTED, MAPPED, ANNOTATED]	putative transmembrane protein	345	9	0	93.54	1	C:GO:0016020	C:membrane			no IPS match	no IPS match	no IPS match	ENOG		8.7e-134	Sarcocystidae		0
TGME49_240610	[INTERPRO, BLASTED]	hypothetical protein TGME49_240610	270	20	0	71.34						no IPS match	no IPS match	no IPS match	ENOG		2.1e-151	Sarcocystidae		0
TGME49_240620	[INTERPRO, BLASTED]	putative transmembrane protein	119	3	3.68918e-79	95.24						no IPS match	no IPS match	no IPS match	ENOG		9.6e-56	Sarcocystidae		0
TGME49_240730	[INTERPRO, BLASTED, MAPPED, ANNOTATED]	putative transmembrane protein	214	20	7.67809e-140	69.75	1	C:GO:0016020	C:membrane			no IPS match	no IPS match	no IPS match	ENOG		5.3e-105	Sarcocystidae		0
TGME49_240755	[INTERPRO, BLASTED]	hypothetical protein TGME49_240755	99	3	3.53939e-62	99.33						no IPS match	no IPS match	no IPS match
TGME49_240780	[INTERPRO, BLASTED, MAPPED, ANNOTATED]	putative transmembrane protein	116	19	3.15199e-59	79.42	1	C:GO:0016020	C:membrane			no IPS match	no IPS match	no IPS match	ENOG		2.6e-45	Sarcocystidae		0
TGME49_240880	[INTERPRO, BLASTED, MAPPED]	TPA: hypothetical protein BN1205_090410	878	20	0	72.22	2	F:GO:0000976; C:GO:0005634	F:transcription cis-regulatory region binding; C:nucleus			no IPS match	no IPS match	no IPS match	ENOG		0	Sarcocystidae		0
TGME49_240920	[INTERPRO, BLASTED]	hypothetical protein TGME49_240920	188	6	2.72811e-70	99.56						no IPS match	no IPS match	no IPS match
TGME49_240940	[INTERPRO, BLASTED]	hypothetical protein TGME49_240940	160	7	8.52194e-96	98.84						no IPS match	no IPS match	no IPS match	ENOG		2.8e-87	Sarcocystidae		0
TGME49_240950	[INTERPRO, BLASTED, MAPPED, ANNOTATED]	putative ADP-ribosylation factor	483	20	0	70.38	33	P:GO:0001947; P:GO:0006886; P:GO:0007224; P:GO:0007606; P:GO:0009953; P:GO:0021532; P:GO:0021830; P:GO:0021943; P:GO:0032989; P:GO:0034067; P:GO:0035845; P:GO:0040011; P:GO:0042073; P:GO:0043001; P:GO:0051674; P:GO:0070986; P:GO:0097500; P:GO:1905515; F:GO:0003924; F:GO:0005525; C:GO:0005794; C:GO:0005930; C:GO:0031514; C:GO:0031528; C:GO:0060170; C:GO:0097543; C:GO:0097730	P:heart looping; P:intracellular protein transport; P:smoothened signaling pathway; P:sensory perception of chemical stimulus; P:dorsal/ventral pattern formation; P:neural tube patterning; P:interneuron migration from the subpallium to the cortex; P:formation of radial glial scaffolds; P:cellular anatomical entity morphogenesis; P:protein localization to Golgi apparatus; P:photoreceptor cell oute…	EC:3.6.1; EC:3.6; EC:3; EC:3.6.1.15	Acting on acid anhydrides; Acting on acid anhydrides; Hydrolases; nucleoside-triphosphate phosphatase	IPR006689 (PFAM); IPR027417 (G3DSA:3.40.50.GENE3D); IPR027417 (G3DSA:3.40.50.GENE3D); IPR024156 (PANTHER); PS51417 (PROSITE_PROFILES); IPR027417 (SUPERFAMILY)	P:GO:0006886; P:GO:0034067; P:GO:0043001; F:GO:0003924; F:GO:0005525; C:GO:0005794	P:intracellular protein transport; P:protein localization to Golgi apparatus; P:Golgi to plasma membrane protein transport; F:GTPase activity; F:GTP binding; C:Golgi apparatus	COG,KOG	GTP binding	1.4e-201	Eukaryota		21	P:GO:0009953; P:GO:0007224; P:GO:1905515; P:GO:0051674; C:GO:0060170; P:GO:0097500; P:GO:0007606; C:GO:0031528; P:GO:0021532; P:GO:0021830; P:GO:0040011; P:GO:0070986; P:GO:0021943; C:GO:0005930; C:GO:0031514; P:GO:0001947; P:GO:0042073; C:GO:0097730; C:GO:0097543; P:GO:0032989; P:GO:0035845	C:microvillus membrane; P:photoreceptor cell outer segment organization; P:sensory perception of chemical stimulus; P:receptor localization to non-motile cilium; P:intraciliary transport; P:dorsal/ventral pattern formation; P:smoothened signaling pathway; C:non-motile cilium; P:localization of cell; P:cellular anatomical entity morphogenesis; C:axoneme; P:neural tube patterning; C:motile cilium; …	K07962
TGME49_240970	[INTERPRO, BLASTED]	hypothetical protein TGP89_240970	892	20	0	83.93						PTHR13491 (PANTHER)	no GO terms	no GO terms	ENOG		0	Sarcocystidae		0
TGME49_240990	[INTERPRO, BLASTED, MAPPED]	K+ channel tetramerisation domain-containing protein	982	12	0	90.91	1	P:GO:0034220	P:monoatomic ion transmembrane transport			no IPS match	no IPS match	no IPS match	ENOG		0	Sarcocystidae		0
TGME49_241155	[INTERPRO, BLASTED, MAPPED, ANNOTATED]	putative transmembrane protein	120	6	5.51817e-70	93.58	2	F:GO:0046872; C:GO:0016020	F:metal ion binding; C:membrane			no IPS match	no IPS match	no IPS match	COG,KOG,ENOG	Haemolysin-III related	5.7e-32	Sarcocystidae		0
TGME49_241165	[INTERPRO, BLASTED, MAPPED]	hypothetical protein TGME49_241165	288	20	0	63.97	2	P:GO:0033194; C:GO:0005829	P:response to hydroperoxide; C:cytosol			IPR029488 (PFAM); IPR038791 (PANTHER)	no GO terms	no GO terms	COG,KOG,ENOG	negative regulation of histone ubiquitination	1.3e-05	Chordata	EC:2.3.2.26	13	P:GO:0006511; P:GO:0031324; P:GO:1900045; F:GO:0051427; F:GO:0061630; C:GO:0016607; P:GO:0045995; P:GO:0044248; P:GO:2001251; F:GO:0046966; P:GO:1905268; P:GO:2000780; C:GO:0005829	P:cellular catabolic process; F:hormone receptor binding; P:ubiquitin-dependent protein catabolic process; C:nuclear speck; P:negative regulation of double-strand break repair; P:negative regulation of cellular metabolic process; C:cytosol; P:regulation of embryonic development; F:nuclear thyroid hormone receptor binding; P:negative regulation of chromosome organization; P:negative regulation of …	K10590	map04120
TGME49_241175	[INTERPRO, BLASTED]	hypothetical protein TGME49_241175	127	4	3.38389e-88	98.77						no IPS match	no IPS match	no IPS match
TGME49_241180	[INTERPRO, BLASTED, MAPPED, ANNOTATED]	putative transmembrane protein	329	20	0	74.41	1	C:GO:0016020	C:membrane			no IPS match	no IPS match	no IPS match	ENOG		1.7e-179	Sarcocystidae		0
TGME49_241300	[INTERPRO, BLASTED]	hypothetical protein TGME49_241300	450	20	0	85.25						no IPS match	no IPS match	no IPS match	ENOG		8.2e-249	Sarcocystidae		0
TGME49_241305	[INTERPRO, BLASTED]	hypothetical protein TGGT1_409620	449	20	0	90.49						no IPS match	no IPS match	no IPS match	ENOG		4.5e-138	Sarcocystidae		0
TGME49_241310	[INTERPRO, BLASTED]	hypothetical protein TGME49_241310	79	20	7.64189e-24	94.66						no IPS match	no IPS match	no IPS match	ENOG		1.6e-22	Sarcocystidae		0
TGME49_241710	[INTERPRO, BLASTED]	hypothetical protein TGME49_241710	496	20	0	89.2						no IPS match	no IPS match	no IPS match	ENOG		1.5e-214	Sarcocystidae		0
TGME49_241850	[INTERPRO, BLASTED]	phd finger protein br140 lin	4533	20	0	85.31						IPR013083 (G3DSA:3.30.40.GENE3D); IPR050701 (PANTHER)	P:GO:0006357	P:regulation of transcription by RNA polymerase II	COG,ENOG	pectinesterase inhibitor activity	0	Sarcocystidae		0
TGME49_241890	[INTERPRO, BLASTED]	hypothetical protein TGME49_241890	175	13	1.66239e-114	94.51						no IPS match	no IPS match	no IPS match	ENOG		1.7e-85	Sarcocystidae		0
TGME49_242260	[INTERPRO, BLASTED, MAPPED, ANNOTATED]	putative transmembrane protein	2871	20	0	97.4	1	C:GO:0016020	C:membrane			no IPS match	no IPS match	no IPS match	ENOG		0	Sarcocystidae		0
TGME49_242310	[INTERPRO, BLASTED]	hypothetical protein TGME49_242310	176	4	5.77323e-109	99.57						no IPS match	no IPS match	no IPS match	ENOG		3.8e-85	Sarcocystidae		0
TGME49_242435	[INTERPRO, BLASTED]	hypothetical protein TGVEG_242435	3118	20	0	98.23						no IPS match	no IPS match	no IPS match	ENOG		0	Sarcocystidae		0
TGME49_242590	[INTERPRO, BLASTED]	hypothetical protein TGME49_242590	467	10	0	92.69						no IPS match	no IPS match	no IPS match	ENOG		1.3e-204	Sarcocystidae		0
TGME49_242640	[INTERPRO, BLASTED]	hypothetical protein TGME49_242640	3202	20	0	84.91						no IPS match	no IPS match	no IPS match	ENOG		0	Sarcocystidae		0
TGME49_242650	[INTERPRO, BLASTED, MAPPED, ANNOTATED]	putative transmembrane protein	248	20	1.07195e-163	66.23	1	C:GO:0016020	C:membrane			IPR029164 (PFAM); PTHR36485 (PANTHER)	no GO terms	no GO terms	ENOG	Phosphatidylinositol N-acetylglucosaminyltransferase subunit Y	5.5e-138	Sarcocystidae		0
TGME49_242670	[INTERPRO, BLASTED, MAPPED, ANNOTATED]	hypothetical protein TGME49_242670	1357	17	0	93.56	1	C:GO:0016020	C:membrane			no IPS match	no IPS match	no IPS match	ENOG		0	Sarcocystidae		0
TGME49_242710	[INTERPRO, BLASTED]	hypothetical protein TGME49_242710	257	7	2.35858e-178	99						no IPS match	no IPS match	no IPS match
TGME49_242740	[INTERPRO, BLASTED]	hypothetical protein TGME49_242740	215	4	6.76363e-159	88.66						no IPS match	no IPS match	no IPS match	ENOG		1.5e-115	Sarcocystidae		0
TGME49_242750	[INTERPRO, BLASTED]	putative trichohyalin	4434	17	0	92.5						no IPS match	no IPS match	no IPS match	ENOG		0	Sarcocystidae		0
TGME49_242780	[INTERPRO, BLASTED, MAPPED, ANNOTATED]	TPA: hypothetical protein BN1205_102870	3816	20	0	95.65	6	F:GO:0008187; F:GO:0030628; C:GO:0000243; C:GO:0016607; C:GO:0071004; C:GO:0089701	F:poly-pyrimidine tract binding; F:pre-mRNA 3'-splice site binding; C:commitment complex; C:nuclear speck; C:U2-type prespliceosome; C:U2AF complex			no IPS match	no IPS match	no IPS match	ENOG		0	Sarcocystidae		0
TGME49_242810	[INTERPRO, BLASTED]	hypothetical protein TGME49_242810	953	15	0	90.77						no IPS match	no IPS match	no IPS match	ENOG		0	Sarcocystidae		0
TGME49_242820	[INTERPRO, BLASTED]	hypothetical protein TGME49_242820	200	3	7.6684e-49	89.12						PS51257 (PROSITE_PROFILES)	no GO terms	no GO terms	ENOG		2.9e-49	Sarcocystidae		0
TGME49_242850	[INTERPRO, BLASTED, MAPPED, ANNOTATED]	putative transmembrane protein	116	8	1.45761e-80	88.83	1	C:GO:0016020	C:membrane			no IPS match	no IPS match	no IPS match	ENOG		6.7e-62	Sarcocystidae		0
TGME49_242860	[INTERPRO, BLASTED, MAPPED, ANNOTATED]	plectin	544	14	0	85.92	2	C:GO:0005856; C:GO:0016020	C:cytoskeleton; C:membrane			G3DSA:1.10.287.1490 (GENE3D)	no GO terms	no GO terms	ENOG		1.2e-161	Sarcocystidae		0
TGME49_242890	[INTERPRO, BLASTED, MAPPED, ANNOTATED]	hypothetical protein TGME49_242890	3149	20	0	95	7	P:GO:0006281; P:GO:0010499; F:GO:0016504; F:GO:0070577; F:GO:0070628; C:GO:0005634; C:GO:0005829	P:DNA repair; P:proteasomal ubiquitin-independent protein catabolic process; F:peptidase activator activity; F:lysine-acetylated histone binding; F:proteasome binding; C:nucleus; C:cytosol			IPR021843 (PFAM); IPR032430 (PFAM); IPR011989 (G3DSA:1.25.10.GENE3D); IPR035309 (PANTHER); IPR016024 (SUPERFAMILY)	P:GO:0010499; F:GO:0016504; F:GO:0070577; F:GO:0070628; C:GO:0005634; C:GO:0005829	P:proteasomal ubiquitin-independent protein catabolic process; F:peptidase activator activity; F:lysine-acetylated histone binding; F:proteasome binding; C:nucleus; C:cytosol	KOG,ENOG	Domain of unknown function (DUF3437)	0	Sarcocystidae		0			K06699	map03050
TGME49_243110	[INTERPRO, BLASTED, MAPPED, ANNOTATED]	toxoplasma gondii family A protein	431	20	0	85.73	1	C:GO:0016020	C:membrane			no IPS match	no IPS match	no IPS match	ENOG	toxoplasma gondii family A protein	8.9e-19	Sarcocystidae		0
TGME49_243220	[INTERPRO, BLASTED]	hypothetical protein TGME49_243220	162	5	2.16081e-115	98.02						no IPS match	no IPS match	no IPS match
TGME49_243290	[INTERPRO, BLASTED, MAPPED, ANNOTATED]	putative transmembrane protein	633	15	0	84.59	1	C:GO:0016020	C:membrane			no IPS match	no IPS match	no IPS match	ENOG		1.4e-307	Sarcocystidae		0
TGME49_243302	[INTERPRO, BLASTED]	hypothetical protein TGME49_243302	73	6	3.35048e-45	98.86						no IPS match	no IPS match	no IPS match	KOG,ENOG	ICE family protease (Caspase) p20 domain-containing protein	2.9e-31	Sarcocystidae		0
TGME49_243310	[INTERPRO, BLASTED]	hypothetical protein TGPRC2_243310A, partial	1266	15	0	89.13						no IPS match	no IPS match	no IPS match	ENOG		0	Sarcocystidae		0
TGME49_243330	[INTERPRO, BLASTED]	TPA: hypothetical protein BN1205_103200	2677	15	0	91.02						no IPS match	no IPS match	no IPS match	ENOG		0	Sarcocystidae		0
TGME49_243420	[INTERPRO, BLASTED, MAPPED, ANNOTATED]	putative transmembrane protein	175	8	1.93626e-121	99.29	1	C:GO:0016020	C:membrane			no IPS match	no IPS match	no IPS match
TGME49_243460	[INTERPRO, BLASTED]	hypothetical protein TGME49_243460	2011	20	0	92.46						no IPS match	no IPS match	no IPS match	ENOG		0	Sarcocystidae		0
TGME49_243470	[INTERPRO, BLASTED, MAPPED, ANNOTATED]	putative transmembrane protein	1033	20	0	75.74	1	C:GO:0016020	C:membrane			no IPS match	no IPS match	no IPS match	ENOG		0	Sarcocystidae		0
TGME49_243520	[INTERPRO, BLASTED]	hypothetical protein TGME49_243520	178	9	3.21014e-86	97.13						no IPS match	no IPS match	no IPS match
TGME49_243635	[INTERPRO, BLASTED]	hypothetical protein TGME49_243635	3624	16	0	89						PTHR34491 (PANTHER)	no GO terms	no GO terms	ENOG		0	Sarcocystidae		0
TGME49_243690	[INTERPRO, BLASTED, MAPPED, ANNOTATED]	putative transmembrane protein	410	20	0	68.84	1	C:GO:0016020	C:membrane			no IPS match	no IPS match	no IPS match	ENOG		1.2e-233	Sarcocystidae		0
TGME49_243700	[INTERPRO, BLASTED, MAPPED]	hypothetical protein TGME49_243700	207	5	2.3198e-134	90.36	1	C:GO:0016020	C:membrane			no IPS match	no IPS match	no IPS match
TGME49_243760	[INTERPRO, BLASTED, MAPPED, ANNOTATED]	TLC domain protein	435	19	0	74.33	4	P:GO:0055088; C:GO:0005654; C:GO:0005783; C:GO:0016020	P:lipid homeostasis; C:nucleoplasm; C:endoplasmic reticulum; C:membrane			IPR006634 (PFAM); IPR050846 (PANTHER); IPR006634 (PROSITE_PROFILES)	P:GO:0055088; C:GO:0005783; C:GO:0016020	P:lipid homeostasis; C:endoplasmic reticulum; C:membrane	ENOG	TLC domain	7.2e-226	Sarcocystidae		0
TGME49_243770	[INTERPRO, BLASTED]	hypothetical protein TGME49_243770	159	3	2.21948e-113	99.37						no IPS match	no IPS match	no IPS match
TGME49_243780	[INTERPRO, BLASTED, MAPPED]	cyclin-like protein	845	20	0	73.3	1	C:GO:0016020	C:membrane			G3DSA:1.10.472.10 (GENE3D); IPR036915 (SUPERFAMILY)	no GO terms	no GO terms	ENOG		0	Sarcocystidae		0
TGME49_243900	[INTERPRO, BLASTED]	hypothetical protein TGME49_243900	136	7	1.01484e-93	98.42						no IPS match	no IPS match	no IPS match
TGME49_243970	[INTERPRO, BLASTED]	hypothetical protein TGME49_243970	1493	15	0	87.84						no IPS match	no IPS match	no IPS match	ENOG		0	Sarcocystidae		0
TGME49_243980	[INTERPRO, BLASTED]	hypothetical protein TGME49_243980	137	9	4.27054e-73	89.57						no IPS match	no IPS match	no IPS match	ENOG		1.1e-42	Sarcocystidae		0
TGME49_244015	[INTERPRO, BLASTED]	hypothetical protein TGME49_244015	84	7	2.79061e-54	97.28						no IPS match	no IPS match	no IPS match
TGME49_244070	[INTERPRO, BLASTED]	hypothetical protein TGME49_244070	202	7	5.33189e-144	98.5						no IPS match	no IPS match	no IPS match	ENOG		1.5e-109	Sarcocystidae		0
TGME49_244080	[INTERPRO, BLASTED, MAPPED, ANNOTATED]	putative transmembrane protein	376	20	0	93.67	1	C:GO:0016020	C:membrane			PS51257 (PROSITE_PROFILES)	no GO terms	no GO terms	ENOG		1.7e-191	Sarcocystidae		0
TGME49_244090	[INTERPRO, BLASTED]	hypothetical protein TGME49_244090	954	17	0	86.91						no IPS match	no IPS match	no IPS match	ENOG		0	Sarcocystidae		0
TGME49_244130	[INTERPRO, BLASTED]	RNA polymerase Rpb1 C-terminal repeat-containing protein	2435	20	0	81.13						no IPS match	no IPS match	no IPS match	ENOG	RNA polymerase Rpb1 C-terminal repeat-containing protein	0	Sarcocystidae		0
TGME49_244140	[INTERPRO, BLASTED, MAPPED, ANNOTATED]	putative transmembrane protein	701	18	0	91.41	2	P:GO:0006139; C:GO:0016020	P:nucleobase-containing compound metabolic process; C:membrane			IPR037027 (G3DSA:3.30.420.GENE3D)	P:GO:0006139	P:nucleobase-containing compound metabolic process	ENOG		1.3e-298	Sarcocystidae		0
TGME49_244165	[INTERPRO, BLASTED]	hypothetical protein TGME49_244165	104	10	8.84268e-69	68.38						no IPS match	no IPS match	no IPS match
TGME49_244170	[INTERPRO, BLASTED]	hypothetical protein TGME49_244170	319	13	0	98.42						no IPS match	no IPS match	no IPS match	ENOG		3.3e-95	Sarcocystidae		0
TGME49_244190	[INTERPRO, BLASTED]	hypothetical protein TGME49_244190	634	11	0	97.24						no IPS match	no IPS match	no IPS match	ENOG		1.2e-109	Sarcocystidae		0
TGME49_244230	[INTERPRO, BLASTED, MAPPED, ANNOTATED]	TPA: hypothetical protein BN1205_103940	947	15	0	91.2	1	C:GO:0016020	C:membrane			no IPS match	no IPS match	no IPS match	ENOG		8.4e-187	Sarcocystidae		0
TGME49_244250	[INTERPRO, BLASTED]	hypothetical protein TGME49_244250	616	18	0	87.27						no IPS match	no IPS match	no IPS match	ENOG		6.9e-166	Sarcocystidae		0
TGME49_244260	[INTERPRO, BLASTED]	putative transmembrane protein	167	6	1.18246e-106	85.7						no IPS match	no IPS match	no IPS match	ENOG		3.3e-86	Sarcocystidae		0
TGME49_244280	[INTERPRO, BLASTED]	putative transmembrane protein	129	2	6.75304e-54	99.61						no IPS match	no IPS match	no IPS match	ENOG		1.5e-57	Sarcocystidae		0
TGME49_244300	[INTERPRO, BLASTED]	hypothetical protein TGARI_244300	1172	15	0	91.96						no IPS match	no IPS match	no IPS match	ENOG		0	Sarcocystidae		0
TGME49_244335	[INTERPRO, BLASTED, MAPPED, ANNOTATED]	putative transmembrane protein	551	17	0	66.82	1	C:GO:0016020	C:membrane			no IPS match	no IPS match	no IPS match	ENOG		1.5e-297	Sarcocystidae		0
TGME49_244400	[INTERPRO, BLASTED, MAPPED, ANNOTATED]	hypothetical protein TGME49_244400	605	20	0	63.78	1	F:GO:0043130	F:ubiquitin binding			IPR022087 (PFAM); IPR045218 (PANTHER)	no GO terms	no GO terms	ENOG	Protein DA1	0	Sarcocystidae		0
TGME49_244460	[INTERPRO, BLASTED, MAPPED, ANNOTATED]	homeotic protein female sterile	1239	20	0	81.24	18	P:GO:0030833; P:GO:0042073; P:GO:0045773; P:GO:0061003; P:GO:0098974; F:GO:0045503; F:GO:0045504; F:GO:0051015; C:GO:0000178; C:GO:0005634; C:GO:0005868; C:GO:0005884; C:GO:0005929; C:GO:0016020; C:GO:0030027; C:GO:0030425; C:GO:0030427; C:GO:0030864	P:regulation of actin filament polymerization; P:intraciliary transport; P:positive regulation of axon extension; P:positive regulation of dendritic spine morphogenesis; P:postsynaptic actin cytoskeleton organization; F:dynein light chain binding; F:dynein heavy chain binding; F:actin filament binding; C:exosome (RNase complex); C:nucleus; C:cytoplasmic dynein complex; C:actin filament; C:cilium;…			no IPS match	no IPS match	no IPS match	ENOG	vestibular reflex	0	Sarcocystidae		0
TGME49_244515	[INTERPRO, BLASTED, MAPPED]	hypothetical protein TGME49_244515	328	20	0	70.02	2	F:GO:0030246; C:GO:0016020	F:carbohydrate binding; C:membrane			no IPS match	no IPS match	no IPS match	ENOG		1.1e-167	Apicomplexa		0
TGME49_244550	[INTERPRO, BLASTED, MAPPED, ANNOTATED]	putative transmembrane protein	631	12	0	92.47	1	C:GO:0016020	C:membrane			no IPS match	no IPS match	no IPS match	ENOG		0	Sarcocystidae		0
TGME49_244570	[INTERPRO, BLASTED, MAPPED, ANNOTATED]	hypothetical protein TGME49_244570	772	20	0	95.14	1	C:GO:0016020	C:membrane			no IPS match	no IPS match	no IPS match	ENOG		9.3e-293	Sarcocystidae		0
TGME49_244600	[INTERPRO, BLASTED, MAPPED]	microneme associated antigen	489	20	0	86.51	1	C:GO:0016020	C:membrane			no IPS match	no IPS match	no IPS match	ENOG		2.6e-176	Sarcocystidae		0
TGME49_244640	[INTERPRO, BLASTED]	hypothetical protein TGME49_244640	1046	18	0	85.61						IPR024975 (PFAM)	no GO terms	no GO terms	ENOG	Domain of unknown function (DUF3883)	0	Sarcocystidae		0
TGME49_244660	[INTERPRO, BLASTED]	WLM domain protein	1332	20	0	84.85						G3DSA:3.30.2010.10 (GENE3D)	no GO terms	no GO terms	ENOG	WLM domain	0	Sarcocystidae		0
TGME49_244670	[INTERPRO, BLASTED]	hypothetical protein TGME49_244670	492	12	0	91.86						no IPS match	no IPS match	no IPS match	ENOG		2.3e-281	Sarcocystidae		0
TGME49_244680	[INTERPRO, BLASTED, MAPPED, ANNOTATED]	adenosine-deaminase domain protein	1474	20	0	77.87	8	P:GO:0008033; F:GO:0003723; F:GO:0008251; F:GO:0046872	P:tRNA processing; F:RNA binding; F:tRNA-specific adenosine deaminase activity; F:metal ion binding	EC:3.5.4; EC:3.5; EC:3; EC:3.5.4.4	Acting on carbon-nitrogen bonds, other than peptide bonds; Acting on carbon-nitrogen bonds, other than peptide bonds; Hydrolases; adenosine deaminase	IPR002466 (PFAM); IPR002466 (PROSITE_PROFILES)	P:GO:0006396; F:GO:0003723; F:GO:0004000	P:RNA processing; F:RNA binding; F:adenosine deaminase activity	KOG,ENOG	Adenosine-deaminase (editase) domain	0	Sarcocystidae		0
TGME49_244690	[INTERPRO, BLASTED, MAPPED]	hypothetical protein TGME49_244690	623	19	0	72.85	1	C:GO:0016020	C:membrane			no IPS match	no IPS match	no IPS match	ENOG		0	Sarcocystidae		0
TGME49_244720	[INTERPRO, BLASTED]	hypothetical protein TGRH88_027720	2924	20	0	95.49						no IPS match	no IPS match	no IPS match	ENOG	multi-organism process	0	Sarcocystidae		0
TGME49_244930	[INTERPRO, BLASTED]	hypothetical protein TGME49_244930	103	14	1.32558e-66	98.97						no IPS match	no IPS match	no IPS match
TGME49_244940	[INTERPRO, BLASTED]	hypothetical protein TGME49_244940	77	3	2.2594e-47	99.13						no IPS match	no IPS match	no IPS match
TGME49_244950	[INTERPRO, BLASTED, MAPPED, ANNOTATED]	putative transmembrane protein	96	5	4.50397e-51	98.33	1	C:GO:0016020	C:membrane			no IPS match	no IPS match	no IPS match
TGME49_245428	[INTERPRO, BLASTED]	hypothetical protein TGME49_245428	246	20	1.82564e-114	88.63						no IPS match	no IPS match	no IPS match	ENOG		2.6e-116	Sarcocystidae		0
TGME49_245440	[INTERPRO, BLASTED]	TPA: hypothetical protein BN1205_006440	5573	20	0	82.64						IPR013083 (G3DSA:3.30.40.GENE3D); IPR011011 (SUPERFAMILY)	no GO terms	no GO terms	ENOG		0	Sarcocystidae		0
TGME49_245475	[INTERPRO, BLASTED]	hypothetical protein TGME49_245475	128	2	4.89181e-89	84.85						no IPS match	no IPS match	no IPS match	ENOG		2.7e-56	Sarcocystidae		0
TGME49_245520	[INTERPRO, BLASTED, MAPPED]	Ribonucleases P/MRP protein subunit Rpp200-like protein	235	20	9.37365e-172	56.42	7	P:GO:0001682; P:GO:0008033; F:GO:0003676; F:GO:0004526; C:GO:0000172; C:GO:0005655; C:GO:0016020	P:tRNA 5'-leader removal; P:tRNA processing; F:nucleic acid binding; F:ribonuclease P activity; C:ribonuclease MRP complex; C:nucleolar ribonuclease P complex; C:membrane			no IPS match	no IPS match	no IPS match	ENOG		1.9e-116	Sarcocystidae		0
TGME49_245530	[INTERPRO, BLASTED, MAPPED, ANNOTATED]	putative transmembrane protein	2525	13	0	89.32	1	C:GO:0016020	C:membrane			no IPS match	no IPS match	no IPS match	ENOG		0	Sarcocystidae		0
TGME49_245550	[INTERPRO, BLASTED, MAPPED, ANNOTATED]	putative transmembrane protein	192	14	1.35191e-113	78.53	2	F:GO:0052745; C:GO:0016020	F:inositol phosphate phosphatase activity; C:membrane	EC:3.1.3	Acting on ester bonds	no IPS match	no IPS match	no IPS match	ENOG		4e-80	Sarcocystidae		0
TGME49_245560	[INTERPRO, BLASTED]	hypothetical protein TGME49_245560	1998	20	0	99.04						no IPS match	no IPS match	no IPS match	ENOG		0	Sarcocystidae		0
TGME49_245600	[INTERPRO, BLASTED]	hypothetical protein TGMAS_245600	428	8	5.85711e-180	85.37						no IPS match	no IPS match	no IPS match	ENOG		5.2e-128	Sarcocystidae		0
TGME49_245610	[INTERPRO, BLASTED, MAPPED, ANNOTATED]	putative transmembrane protein	812	20	0	86.37	1	C:GO:0016020	C:membrane			no IPS match	no IPS match	no IPS match	ENOG		0	Sarcocystidae		0
TGME49_245630	[INTERPRO, BLASTED, MAPPED, ANNOTATED]	putative transmembrane protein	73	20	4.86743e-45	70.37	1	C:GO:0016020	C:membrane			no IPS match	no IPS match	no IPS match	ENOG		1.7e-34	Sarcocystidae		0
TGME49_245640	[INTERPRO, BLASTED]	hypothetical protein TGME49_245640	416	20	0	76.15						no IPS match	no IPS match	no IPS match	ENOG		1.2e-241	Sarcocystidae		0
TGME49_245740	[INTERPRO, BLASTED]	hypothetical protein TGME49_245740	176	7	7.44754e-122	98.7						no IPS match	no IPS match	no IPS match	ENOG		8.2e-96	Sarcocystidae		0
TGME49_245748	[INTERPRO, BLASTED]	hypothetical protein TGME49_245748	451	13	0	95						no IPS match	no IPS match	no IPS match
TGME49_245760	[INTERPRO, BLASTED]	hypothetical protein TGME49_245760	145	3	3.44881e-88	98.85						no IPS match	no IPS match	no IPS match
TGME49_245770	[INTERPRO, BLASTED]	hypothetical protein TGME49_245770	717	20	0	91.57						no IPS match	no IPS match	no IPS match	ENOG		0	Sarcocystidae		0
TGME49_245980	[INTERPRO, BLASTED]	hypothetical protein TGME49_245980	717	20	0	94.59						cd14686 (CDD)	no GO terms	no GO terms	ENOG		2.8e-259	Sarcocystidae		0
TGME49_245990	[INTERPRO, BLASTED]	hypothetical protein TGME49_245990	616	18	0	75.96						no IPS match	no IPS match	no IPS match	ENOG		2e-242	Sarcocystidae		0
TGME49_246010	[INTERPRO, BLASTED, MAPPED, ANNOTATED]	alpha/beta hydrolase family protein	1012	20	0	74.75	10	P:GO:0098734; P:GO:0099175; F:GO:0008474; C:GO:0005886; C:GO:0010008	P:macromolecule depalmitoylation; P:regulation of postsynapse organization; F:palmitoyl-(protein) hydrolase activity; C:plasma membrane; C:endosome membrane	EC:3.1; EC:3.1.2.22; EC:3; EC:3.1.2	Acting on ester bonds; palmitoyl-protein hydrolase; Hydrolases; Acting on ester bonds	IPR029058 (G3DSA:3.40.50.GENE3D); IPR029058 (G3DSA:3.40.50.GENE3D); IPR029058 (SUPERFAMILY)	no GO terms	no GO terms	COG,KOG,ENOG	palmitoyl-(protein) hydrolase activity	0	Sarcocystidae		0
TGME49_246050	[INTERPRO, BLASTED]	hypothetical protein TGME49_246050	898	20	0	92.98						no IPS match	no IPS match	no IPS match	ENOG		0	Sarcocystidae		0
TGME49_246090	[INTERPRO, BLASTED, MAPPED]	hypothetical protein TGME49_246090	950	20	0	92.81	3	P:GO:0031087; C:GO:0000932; C:GO:0016020	P:deadenylation-independent decapping of nuclear-transcribed mRNA; C:P-body; C:membrane			PF21403 (PFAM); G3DSA:3.10.20.90 (GENE3D)	no GO terms	no GO terms	ENOG		0	Sarcocystidae		0
TGME49_246140	[INTERPRO, BLASTED, MAPPED, ANNOTATED]	alpha-ketoglutarate-dependent dioxygenase alkB homolog 4 isoform 2	1033	20	0	86.6	18	P:GO:0031032; P:GO:0036090; P:GO:0070988; P:GO:0141137; F:GO:0003779; F:GO:0035516; C:GO:0005622; C:GO:0030496; C:GO:0070938	P:actomyosin structure organization; P:cleavage furrow ingression; P:demethylation; P:positive regulation of gene expression, epigenetic; F:actin binding; F:broad specificity oxidative DNA demethylase activity; C:intracellular anatomical structure; C:midbody; C:contractile ring	EC:1.14.11; EC:1; EC:1.14; EC:1.14.11.33	Acting on paired donors, with incorporation or reduction of molecular oxygen. The oxygen incorporated need not be derived from O2; Oxidoreductases; Acting on paired donors, with incorporation or reduction of molecular oxygen. The oxygen incorporated need not be derived from O2; DNA oxidative demethylase	IPR037151 (G3DSA:2.60.120.GENE3D); SSF51197 (SUPERFAMILY)	no GO terms	no GO terms	KOG,ENOG	Alpha-ketoglutarate-dependent dioxygenase alkB homolog 4	0	Sarcocystidae		0
TGME49_246160	[INTERPRO, BLASTED, MAPPED, ANNOTATED]	putative zinc finger protein	993	20	0	75.53	10	P:GO:0016567; F:GO:0046872; F:GO:0061630; C:GO:0005737; C:GO:0016020	P:protein ubiquitination; F:metal ion binding; F:ubiquitin protein ligase activity; C:cytoplasm; C:membrane	EC:2.3; EC:2; EC:2.3.2	Acyltransferases; Transferases; Acyltransferases	IPR001841 (PFAM); IPR013083 (G3DSA:3.30.40.GENE3D); PTHR15710 (PANTHER); IPR001841 (PROSITE_PROFILES); SSF57850 (SUPERFAMILY)	P:GO:0016567; F:GO:0061630; C:GO:0005737	P:protein ubiquitination; F:ubiquitin protein ligase activity; C:cytoplasm	ENOG	zinc finger (C3HC4 RING finger) protein	0	Sarcocystidae		0
TGME49_246178	[INTERPRO, BLASTED, MAPPED, ANNOTATED]	sulfite exporter TauE/SafE protein	482	20	0	81.47	4	P:GO:0016567; F:GO:0005515; C:GO:0016020; C:GO:0031464	P:protein ubiquitination; F:protein binding; C:membrane; C:Cul4A-RING E3 ubiquitin ligase complex			IPR002781 (PFAM); PTHR14255 (PANTHER)	P:GO:0016567; C:GO:0016020; C:GO:0031464	P:protein ubiquitination; C:membrane; C:Cul4A-RING E3 ubiquitin ligase complex	ENOG	Sulfite exporter TauE/SafE	6e-258	Sarcocystidae		0
TGME49_246210	[INTERPRO, BLASTED]	hypothetical protein TGME49_246210	100	2	1.08577e-63	97.5						no IPS match	no IPS match	no IPS match
TGME49_246450	[INTERPRO, BLASTED, MAPPED, ANNOTATED]	putative transmembrane protein	251	20	6.5238e-168	82.21	1	C:GO:0016020	C:membrane			no IPS match	no IPS match	no IPS match	ENOG		1.3e-115	Sarcocystidae		0
TGME49_246460	[INTERPRO, BLASTED, MAPPED, ANNOTATED]	putative transmembrane protein	634	20	0	85.55	1	C:GO:0016020	C:membrane			PTHR38483 (PANTHER); SSF81324 (SUPERFAMILY)	no GO terms	no GO terms	ENOG		0	Sarcocystidae		0
TGME49_246475	[INTERPRO, BLASTED, MAPPED, ANNOTATED]	putative transmembrane protein	829	20	0	91.85	1	C:GO:0016020	C:membrane			no IPS match	no IPS match	no IPS match	ENOG		0	Sarcocystidae		0
TGME49_246520	[INTERPRO, BLASTED, MAPPED, ANNOTATED]	Chromosome III, complete sequence, related	979	20	0	90.23	5	P:GO:0006289; P:GO:0006360; P:GO:0006366; C:GO:0000439; C:GO:0005675	P:nucleotide-excision repair; P:transcription by RNA polymerase I; P:transcription by RNA polymerase II; C:transcription factor TFIIH core complex; C:transcription factor TFIIH holo complex			IPR027079 (PANTHER); IPR005607 (PROSITE_PROFILES)	P:GO:0006281; P:GO:0006289; P:GO:0006351; P:GO:0006360; P:GO:0006366; P:GO:0070816; C:GO:0000439; C:GO:0005675	P:DNA repair; P:nucleotide-excision repair; P:DNA-templated transcription; P:transcription by RNA polymerase I; P:transcription by RNA polymerase II; P:obsolete phosphorylation of RNA polymerase II C-terminal domain; C:transcription factor TFIIH core complex; C:transcription factor TFIIH holo complex	ENOG		0	Sarcocystidae		0
TGME49_246535	[INTERPRO, BLASTED]	hypothetical protein TGME49_246535	115	3	7.57635e-68	99.71						no IPS match	no IPS match	no IPS match
TGME49_246555	[INTERPRO, BLASTED]	hypothetical protein TGME49_246555	319	11	1.26309e-108	95.65						no IPS match	no IPS match	no IPS match
TGME49_246570	[INTERPRO, BLASTED, MAPPED]	hypothetical protein TGME49_246570	226	20	5.41684e-126	69.48	5	P:GO:0051085; P:GO:0071218; F:GO:0030544; C:GO:0005789; C:GO:0016020	P:chaperone cofactor-dependent protein refolding; P:cellular response to misfolded protein; F:Hsp70 protein binding; C:endoplasmic reticulum membrane; C:membrane			no IPS match	no IPS match	no IPS match	ENOG		1.3e-98	Sarcocystidae		0
TGME49_246580	[INTERPRO, BLASTED, MAPPED, ANNOTATED]	putative transmembrane protein	383	17	0	70.79	1	C:GO:0016020	C:membrane			no IPS match	no IPS match	no IPS match	ENOG		3.5e-168	Sarcocystidae		0
TGME49_246590	[INTERPRO, BLASTED]	hypothetical protein TGME49_246590	447	10	0	90.99						no IPS match	no IPS match	no IPS match	ENOG		7.4e-218	Sarcocystidae		0
TGME49_246670	[INTERPRO, BLASTED, MAPPED, ANNOTATED]	hypothetical protein TGME49_246670	358	8	0	88.53	2	P:GO:0006352; F:GO:0046982	P:DNA-templated transcription initiation; F:protein heterodimerization activity			IPR003162 (PFAM); IPR009072 (G3DSA:1.10.20.GENE3D)	P:GO:0006352; F:GO:0046982	P:DNA-templated transcription initiation; F:protein heterodimerization activity	ENOG		3.3e-168	Sarcocystidae		0
TGME49_246700	[INTERPRO, BLASTED]	hypothetical protein TGME49_246700	189	6	7.47888e-134	98.85						no IPS match	no IPS match	no IPS match
TGME49_246710	[INTERPRO, BLASTED, MAPPED, ANNOTATED]	putative transmembrane protein	463	11	0	91.36	1	C:GO:0016020	C:membrane			no IPS match	no IPS match	no IPS match	ENOG		3.5e-255	Sarcocystidae		0
TGME49_246720	[INTERPRO, BLASTED, MAPPED]	hypothetical protein TGME49_246720	502	20	0	64.53	1	F:GO:0008289	F:lipid binding			no IPS match	no IPS match	no IPS match	ENOG		7.6e-288	Sarcocystidae		0
TGME49_246750	[INTERPRO, BLASTED, MAPPED, ANNOTATED]	putative transmembrane protein	461	13	0	91.51	1	C:GO:0016020	C:membrane			no IPS match	no IPS match	no IPS match	ENOG		3e-230	Sarcocystidae		0
TGME49_246760	[INTERPRO, BLASTED, MAPPED, ANNOTATED]	PRPF39, related protein	2831	20	0	86.43	5	P:GO:0000395; F:GO:0030627; C:GO:0000243; C:GO:0005685; C:GO:0071004	P:mRNA 5'-splice site recognition; F:pre-mRNA 5'-splice site binding; C:commitment complex; C:U1 snRNP; C:U2-type prespliceosome			IPR011990 (G3DSA:1.25.40.GENE3D); IPR008847 (PFAM); IPR011990 (G3DSA:1.25.40.GENE3D); PTHR17204 (PANTHER); IPR011990 (SUPERFAMILY); IPR011990 (SUPERFAMILY)	P:GO:0000395; P:GO:0006396; F:GO:0005515; F:GO:0030627; C:GO:0000243; C:GO:0005634; C:GO:0005685; C:GO:0071004	P:mRNA 5'-splice site recognition; P:RNA processing; F:protein binding; F:pre-mRNA 5'-splice site binding; C:commitment complex; C:nucleus; C:U1 snRNP; C:U2-type prespliceosome	KOG,ENOG	mRNA 5'-splice site recognition	0	Sarcocystidae		0
TGME49_246763	[INTERPRO, BLASTED]	hypothetical protein TGMAS_246763	133	2	3.56109e-70	99.62						no IPS match	no IPS match	no IPS match
TGME49_246770	[INTERPRO, BLASTED, MAPPED]	hypothetical protein TGME49_246770	543	18	0	77.41	2	F:GO:0003729; C:GO:0016020	F:mRNA binding; C:membrane			IPR028078 (PFAM)	no GO terms	no GO terms	ENOG	Transcription factor with AP2 domain(s)	1.1e-258	Sarcocystidae		0
TGME49_246780	[INTERPRO, BLASTED, MAPPED, ANNOTATED]	putative transmembrane protein	764	20	0	72.72	8	P:GO:0046513; F:GO:0033188; F:GO:0047493; C:GO:0016020	P:ceramide biosynthetic process; F:sphingomyelin synthase activity; F:ceramide cholinephosphotransferase activity; C:membrane	EC:2.7.8.3; EC:2.7; EC:2; EC:2.7.8; EC:2.7.8.27	ceramide cholinephosphotransferase; Transferring phosphorus-containing groups; Transferases; Transferring phosphorus-containing groups; sphingomyelin synthase	IPR045221 (PANTHER)	P:GO:0046513; F:GO:0016780; F:GO:0033188; F:GO:0047493; C:GO:0005886; C:GO:0030173; C:GO:0030176	P:ceramide biosynthetic process; F:phosphotransferase activity, for other substituted phosphate groups; F:sphingomyelin synthase activity; F:ceramide cholinephosphotransferase activity; C:plasma membrane; C:obsolete integral component of Golgi membrane; C:obsolete integral component of endoplasmic reticulum membrane	KOG,ENOG	PAP2 superfamily C-terminal	0	Sarcocystidae		0
TGME49_246960	[INTERPRO, BLASTED, MAPPED, ANNOTATED]	metallo-beta-lactamase domain protein	775	20	0	82.84	1	F:GO:0016787	F:hydrolase activity	EC:3	Hydrolases	IPR036866 (G3DSA:3.60.15.GENE3D); IPR001279 (PFAM); IPR050419 (PANTHER); IPR036866 (SUPERFAMILY)	no GO terms	no GO terms	COG,ENOG	Beta-lactamase superfamily domain	0	Sarcocystidae		0
TGME49_246978	[INTERPRO, BLASTED, MAPPED, ANNOTATED]	putative transmembrane protein	1463	20	0	79.84	10	P:GO:0000963; P:GO:0044528; P:GO:1901137; P:GO:1901259; F:GO:0003723; F:GO:0016740; C:GO:0005759; C:GO:0009507; C:GO:0016020; C:GO:0035770	P:mitochondrial RNA processing; P:regulation of mitochondrial mRNA stability; P:carbohydrate derivative biosynthetic process; P:chloroplast rRNA processing; F:RNA binding; F:transferase activity; C:mitochondrial matrix; C:chloroplast; C:membrane; C:ribonucleoprotein granule	EC:2	Transferases	no IPS match	no IPS match	no IPS match	COG,KOG,ENOG	GDP-Man:Man3GlcNAc2-PP-Dol alpha-1,2-mannosyltransferase activity	0	Sarcocystidae		0
TGME49_246982	[INTERPRO, BLASTED, MAPPED, ANNOTATED]	putative glycosyltransferase	1042	20	0	75.98	8	P:GO:0006487; P:GO:0006490; F:GO:0004377; C:GO:0005789	P:protein N-linked glycosylation; P:oligosaccharide-lipid intermediate biosynthetic process; F:GDP-Man:Man3GlcNAc2-PP-Dol alpha-1,2-mannosyltransferase activity; C:endoplasmic reticulum membrane	EC:2.4; EC:2; EC:2.4.1.131; EC:2.4.1	Glycosyltransferases; Transferases; GDP-Man:Man3GlcNAc2-PP-dolichol alpha-1,2-mannosyltransferase; Glycosyltransferases	G3DSA:3.40.50.2000 (GENE3D); IPR031814 (PFAM); SSF53756 (SUPERFAMILY)	no GO terms	no GO terms	COG,KOG,ENOG	GDP-Man:Man3GlcNAc2-PP-Dol alpha-1,2-mannosyltransferase activity	0	Sarcocystidae		0
TGME49_246990	[INTERPRO, BLASTED]	hypothetical protein TGME49_246990	544	8	0	91.08						no IPS match	no IPS match	no IPS match	ENOG		6.3e-187	Sarcocystidae		0
TGME49_246995	[INTERPRO, BLASTED, MAPPED, ANNOTATED]	hypothetical protein TGME49_246995	1389	20	0	87.96	1	C:GO:0005634	C:nucleus			no IPS match	no IPS match	no IPS match
TGME49_247015	[INTERPRO, BLASTED]	hypothetical protein TGME49_247015	709	9	0	94.33						no IPS match	no IPS match	no IPS match
TGME49_247030	[INTERPRO, BLASTED]	hypothetical protein TGME49_247030	138	3	5.34414e-95	93.15						no IPS match	no IPS match	no IPS match	ENOG		7.2e-71	Sarcocystidae		0
TGME49_247040	[INTERPRO, BLASTED]	hypothetical protein TGME49_247040	1140	20	0	89.29						no IPS match	no IPS match	no IPS match	ENOG		0	Sarcocystidae		0
TGME49_247050	[INTERPRO, BLASTED]	hypothetical protein TGME49_247050	2660	18	0	90.49						no IPS match	no IPS match	no IPS match	ENOG		0	Sarcocystidae		0
TGME49_247260	[INTERPRO, BLASTED]	hypothetical protein TGME49_247260	157	7	1.23779e-110	98.36						no IPS match	no IPS match	no IPS match
TGME49_247280	[INTERPRO, BLASTED, MAPPED, ANNOTATED]	putative transmembrane protein	2478	20	0	84.66	3	P:GO:0032259; F:GO:0008757; C:GO:0016020	P:methylation; F:S-adenosylmethionine-dependent methyltransferase activity; C:membrane	EC:2.1.1	Transferring one-carbon groups	G3DSA:3.30.70.100 (GENE3D); IPR036873 (G3DSA:3.40.250.GENE3D); IPR022111 (PFAM); IPR040503 (PFAM); IPR029063 (G3DSA:3.40.50.GENE3D); PTHR43846 (PANTHER); IPR001763 (PROSITE_PROFILES); IPR036873 (SUPERFAMILY); IPR029063 (SUPERFAMILY); IPR029063 (SUPERFAMILY)	no GO terms	no GO terms	ENOG		0	Sarcocystidae		0
TGME49_247290	[INTERPRO, BLASTED, MAPPED, ANNOTATED]	putative transmembrane protein	2050	20	0	93.2	5	P:GO:0051792; P:GO:0051793; F:GO:0008126; F:GO:0047372; C:GO:0016020	P:medium-chain fatty acid biosynthetic process; P:medium-chain fatty acid catabolic process; F:acetylesterase activity; F:acylglycerol lipase activity; C:membrane	EC:3.1.1.23; EC:3.1.1.6	acylglycerol lipase; acetylesterase	IPR029058 (G3DSA:3.40.50.GENE3D); IPR050960 (PANTHER); IPR029058 (SUPERFAMILY)	P:GO:0044255; F:GO:0034338; F:GO:0047372	P:cellular lipid metabolic process; F:short-chain carboxylesterase activity; F:acylglycerol lipase activity	ENOG		0	Sarcocystidae		0
TGME49_247300	[INTERPRO, BLASTED, MAPPED]	hypothetical protein TGME49_247300	903	20	0	82.44	4	P:GO:0006607; F:GO:0008139; F:GO:0061608; C:GO:0005634	P:NLS-bearing protein import into nucleus; F:nuclear localization sequence binding; F:nuclear import signal receptor activity; C:nucleus			IPR011989 (G3DSA:1.25.10.GENE3D); IPR016024 (SUPERFAMILY)	no GO terms	no GO terms	ENOG		0	Sarcocystidae		0
TGME49_247400	[INTERPRO, BLASTED, MAPPED, ANNOTATED]	putative transmembrane protein	277	7	6.07044e-164	92.57	1	C:GO:0016020	C:membrane			no IPS match	no IPS match	no IPS match	ENOG		1.3e-151	Sarcocystidae		0
TGME49_247420	[INTERPRO, BLASTED, MAPPED, ANNOTATED]	putative transmembrane protein	648	11	0	90.31	1	C:GO:0016020	C:membrane			no IPS match	no IPS match	no IPS match	ENOG		0	Sarcocystidae		0
TGME49_247450	[INTERPRO, BLASTED, MAPPED, ANNOTATED]	trithorax group protein osa-like	2303	20	0	92.65	2	F:GO:0003676; F:GO:0046872	F:nucleic acid binding; F:metal ion binding			IPR000571 (PROSITE_PROFILES); IPR000571 (PROSITE_PROFILES); IPR035979 (SUPERFAMILY)	F:GO:0003676; F:GO:0046872	F:nucleic acid binding; F:metal ion binding	ENOG		0	Sarcocystidae		0
TGME49_247530	[INTERPRO, BLASTED]	putative transmembrane protein	213	6	1.93599e-136	97.57						no IPS match	no IPS match	no IPS match	ENOG		7.3e-115	Sarcocystidae		0
TGME49_247570	[INTERPRO, BLASTED, MAPPED]	TPA: leucine rich repeat protein, putative	696	20	0	74.28	1	C:GO:0005737	C:cytoplasm			PF14580 (PFAM); IPR032675 (G3DSA:3.80.10.GENE3D); IPR042655 (PANTHER); SSF52058 (SUPERFAMILY)	no GO terms	no GO terms	ENOG		7.2e-244	Sarcocystidae		0
TGME49_247620	[INTERPRO, BLASTED]	hypothetical protein TGARI_247620	240	7	2.09045e-147	99.17						no IPS match	no IPS match	no IPS match
TGME49_247640	[INTERPRO, BLASTED]	hypothetical protein TGME49_247640	341	7	1.21654e-171	99.59						no IPS match	no IPS match	no IPS match	ENOG		7.3e-149	Sarcocystidae		0
TGME49_247680	[INTERPRO, BLASTED, MAPPED, ANNOTATED]	putative transmembrane protein	1718	20	0	96.5	1	C:GO:0005634	C:nucleus			no IPS match	no IPS match	no IPS match	ENOG		0	Sarcocystidae		0
TGME49_247720	[INTERPRO, BLASTED]	hypothetical protein TGME49_247720	202	9	5.71766e-112	96.08						no IPS match	no IPS match	no IPS match
TGME49_247750	[INTERPRO, BLASTED]	hypothetical protein TGME49_247750	328	12	0	88.57						no IPS match	no IPS match	no IPS match	ENOG		2.5e-162	Sarcocystidae		0
TGME49_247780	[INTERPRO, BLASTED, MAPPED, ANNOTATED]	putative transmembrane protein	267	20	0	63.86	1	C:GO:0016020	C:membrane			no IPS match	no IPS match	no IPS match	ENOG		2.6e-154	Sarcocystidae		0
TGME49_247940	[INTERPRO, BLASTED]	hypothetical protein TGME49_247940	673	15	0	88.17						no IPS match	no IPS match	no IPS match	ENOG		0	Sarcocystidae		0
TGME49_247960	[INTERPRO, BLASTED]	putative transmembrane protein	351	11	0	94.78						no IPS match	no IPS match	no IPS match	ENOG		1.3e-156	Sarcocystidae		0
TGME49_247970	[INTERPRO, BLASTED, MAPPED, ANNOTATED]	putative transmembrane protein	1237	20	0	77.27	1	C:GO:0016020	C:membrane			IPR000884 (PROSITE_PROFILES)	no GO terms	no GO terms	ENOG		0	Sarcocystidae		0
TGME49_247980	[INTERPRO, BLASTED, MAPPED, ANNOTATED]	family UPF0197 protein	120	5	2.57025e-41	92.56	2	P:GO:0006487; C:GO:0034998	P:protein N-linked glycosylation; C:oligosaccharyltransferase I complex			IPR007915 (PFAM); IPR007915 (PANTHER)	P:GO:0006487; C:GO:0032991; C:GO:0034998; C:GO:0043227	P:protein N-linked glycosylation; C:protein-containing complex; C:oligosaccharyltransferase I complex; C:membrane-bounded organelle	ENOG	Oligosaccharyltransferase subunit 5	1.3e-52	Sarcocystidae		0
TGME49_248120	[INTERPRO, BLASTED, MAPPED, ANNOTATED]	putative RSC6/BAF60A-like with A SWIB domain, related protein	962	20	0	84.14	14	P:GO:0006337; P:GO:0045815; P:GO:0045893; P:GO:0051276; F:GO:0003682; F:GO:0005102; F:GO:0005198; F:GO:0060090; C:GO:0000228; C:GO:0005634; C:GO:0005654; C:GO:0016514; C:GO:0071564; C:GO:0071565	P:nucleosome disassembly; P:transcription initiation-coupled chromatin remodeling; P:positive regulation of DNA-templated transcription; P:chromosome organization; F:chromatin binding; F:signaling receptor binding; F:structural molecule activity; F:molecular adaptor activity; C:nuclear chromosome; C:nucleus; C:nucleoplasm; C:SWI/SNF complex; C:npBAF complex; C:nBAF complex			IPR036885 (G3DSA:1.10.245.GENE3D); IPR036885 (SUPERFAMILY)	no GO terms	no GO terms	COG,KOG,ENOG	SWIB/MDM2 domain	0	Sarcocystidae		13	C:GO:0000228; F:GO:0005102; P:GO:0051276; F:GO:0060090; P:GO:0045815; P:GO:0006337; C:GO:0005654; C:GO:0016514; P:GO:0045893; F:GO:0005198; F:GO:0003682; C:GO:0071565; C:GO:0071564	F:structural molecule activity; F:molecular adaptor activity; F:signaling receptor binding; C:npBAF complex; C:nBAF complex; C:nuclear chromosome; C:SWI/SNF complex; P:positive regulation of DNA-templated transcription; P:nucleosome disassembly; P:transcription initiation-coupled chromatin remodeling; P:chromosome organization; F:chromatin binding; C:nucleoplasm
TGME49_248130	[INTERPRO, BLASTED]	hypothetical protein TGARI_248130	865	15	0	90.86						no IPS match	no IPS match	no IPS match	ENOG		0	Sarcocystidae		0
TGME49_248140	[INTERPRO, BLASTED, MAPPED, ANNOTATED]	putative transmembrane protein	518	14	0	92.53	1	C:GO:0016020	C:membrane			no IPS match	no IPS match	no IPS match	ENOG		3.2e-273	Sarcocystidae		0
TGME49_248180	[INTERPRO, BLASTED]	hypothetical protein TGME49_248180	173	7	7.31897e-21	97.9						no IPS match	no IPS match	no IPS match	ENOG		0.0036	Sarcocystidae		0
TGME49_248190	[INTERPRO, BLASTED, MAPPED, ANNOTATED]	ribosomal protein L7Ae	1051	20	0	86.94	1	C:GO:0005840	C:ribosome			IPR029064 (G3DSA:3.30.1330.GENE3D); IPR029064 (SUPERFAMILY)	no GO terms	no GO terms	ENOG		0	Sarcocystidae		0
TGME49_248210	[INTERPRO, BLASTED]	hypothetical protein TGME49_248210	294	7	0	94.54						no IPS match	no IPS match	no IPS match	ENOG		9.4e-145	Sarcocystidae		0
TGME49_248260	[INTERPRO, BLASTED, MAPPED, ANNOTATED]	putative transmembrane protein	198	6	2.75375e-105	80.29	1	C:GO:0016020	C:membrane			no IPS match	no IPS match	no IPS match	ENOG		1.1e-101	Sarcocystidae		0
TGME49_248280	[INTERPRO, BLASTED]	hypothetical protein TGME49_248280	112	7	6.7619e-77	98.85						no IPS match	no IPS match	no IPS match	ENOG		7.4e-58	Sarcocystidae		0
TGME49_248300	[INTERPRO, BLASTED, MAPPED, ANNOTATED]	putative transmembrane protein	893	14	0	94.21	1	C:GO:0016020	C:membrane			no IPS match	no IPS match	no IPS match	ENOG		0	Sarcocystidae		0
TGME49_248350	[INTERPRO, BLASTED]	hypothetical protein TGME49_248350	336	9	0	91.18						no IPS match	no IPS match	no IPS match	ENOG		2.2e-65	Sarcocystidae		0
TGME49_248360	[INTERPRO, BLASTED]	hypothetical protein TGME49_248360	247	7	4.42114e-172	90.64						no IPS match	no IPS match	no IPS match	ENOG		9.3e-138	Sarcocystidae		0
TGME49_248380	[INTERPRO, BLASTED, MAPPED, ANNOTATED]	putative transmembrane protein	272	20	0	73.85	1	C:GO:0016020	C:membrane			IPR021366 (PFAM)	no GO terms	no GO terms	ENOG	Protein of unknown function (DUF2981)	2e-141	Sarcocystidae		0
TGME49_248425	[INTERPRO, BLASTED]	hypothetical protein TGME49_248425	178	6	2.15641e-114	98.57						no IPS match	no IPS match	no IPS match
TGME49_248430	[INTERPRO, BLASTED, MAPPED]	hypothetical protein TGME49_248430	327	16	0	77.21	1	F:GO:0008080	F:N-acetyltransferase activity			no IPS match	no IPS match	no IPS match	ENOG		9.3e-178	Sarcocystidae		0
TGME49_248440	[INTERPRO, BLASTED, MAPPED, ANNOTATED]	peptide synthase-like condensation domain	1380	20	0	81.46	2	F:GO:0008080	F:N-acetyltransferase activity	EC:2.3; EC:2; EC:2.3.1	Acyltransferases; Transferases; Acyltransferases	no IPS match	no IPS match	no IPS match	ENOG		0	Sarcocystidae		0
TGME49_248445	[INTERPRO, BLASTED]	hypothetical protein TGME49_248445	233	6	1.54417e-133	92.94						no IPS match	no IPS match	no IPS match	ENOG		0.00044	Haemosporida		0
TGME49_248490	[INTERPRO, BLASTED, MAPPED, ANNOTATED]	hypothetical protein TGME49_248490	123	20	3.73524e-83	67.92	1	C:GO:0070603	C:SWI/SNF superfamily-type complex			no IPS match	no IPS match	no IPS match	ENOG		3.8e-63	Sarcocystidae		0
TGME49_248510	[INTERPRO, BLASTED]	hypothetical protein TGME49_248510	11933	20	0	94.75						no IPS match	no IPS match	no IPS match	ENOG		0	Sarcocystidae		0
TGME49_248520	[INTERPRO, BLASTED]	hypothetical protein TGME49_248520	283	8	0	87.93						no IPS match	no IPS match	no IPS match	ENOG		1.3e-156	Sarcocystidae		0
TGME49_248560	[INTERPRO, BLASTED]	hypothetical protein TGME49_248560	236	8	6.79678e-116	98.78						no IPS match	no IPS match	no IPS match
TGME49_248570	[INTERPRO, BLASTED, MAPPED, ANNOTATED]	putative trichohyalin	1879	20	0	95.36	16	P:GO:0000045; P:GO:0007076; P:GO:0030705; P:GO:0031122; P:GO:0039689; P:GO:0048167; P:GO:0048790; F:GO:0003682; F:GO:0008017; F:GO:0051959; F:GO:0098882; C:GO:0000421; C:GO:0000785; C:GO:0000793; C:GO:0000796; C:GO:0005813	P:autophagosome assembly; P:mitotic chromosome condensation; P:cytoskeleton-dependent intracellular transport; P:cytoplasmic microtubule organization; P:negative stranded viral RNA replication; P:regulation of synaptic plasticity; P:maintenance of presynaptic active zone structure; F:chromatin binding; F:microtubule binding; F:dynein light intermediate chain binding; F:structural constituent of p…			G3DSA:1.20.120.330 (GENE3D); SSF90257 (SUPERFAMILY)	no GO terms	no GO terms	ENOG		0	Sarcocystidae		0
TGME49_248590	[INTERPRO, BLASTED, MAPPED, ANNOTATED]	putative EF hand protein	821	17	0	94.53	1	F:GO:0005509	F:calcium ion binding			G3DSA:1.10.238.10 (GENE3D); IPR002048 (PROSITE_PROFILES)	F:GO:0005509	F:calcium ion binding	ENOG		0	Sarcocystidae		0
TGME49_248620	[INTERPRO, BLASTED]	hypothetical protein TGME49_248620	229	7	2.0867e-137	98.94						no IPS match	no IPS match	no IPS match
TGME49_248673	[INTERPRO, BLASTED, MAPPED, ANNOTATED]	putative transmembrane protein	90	20	2.58978e-43	81.69	1	C:GO:0016020	C:membrane			no IPS match	no IPS match	no IPS match	ENOG	Encoded by	4.6e-42	Apicomplexa		0
TGME49_248680	[INTERPRO, BLASTED, MAPPED]	hypothetical protein TGME49_248680	1516	19	0	83.55	5	P:GO:0006355; F:GO:0003677; F:GO:0003700; C:GO:0005634; C:GO:0016020	P:regulation of DNA-templated transcription; F:DNA binding; F:DNA-binding transcription factor activity; C:nucleus; C:membrane			no IPS match	no IPS match	no IPS match	ENOG		0	Sarcocystidae		0
TGME49_248690	[INTERPRO, BLASTED]	alveolin domain containing intermediate filament IMC12	340	12	6.01714e-162	87.38						no IPS match	no IPS match	no IPS match	ENOG		2.4e-120	Sarcocystidae		0
TGME49_248720	[INTERPRO, BLASTED, MAPPED, ANNOTATED]	hypothetical protein TGME49_248720	3071	20	0	85.5	4	P:GO:0010468; P:GO:0071027; F:GO:0003676; C:GO:0110165	P:regulation of gene expression; P:nuclear RNA surveillance; F:nucleic acid binding; C:cellular anatomical entity			no IPS match	no IPS match	no IPS match	ENOG		0	Sarcocystidae		0
TGME49_248730	[INTERPRO, BLASTED]	putative oocyst wall protein	534	20	0	63.64						PTHR37157 (PANTHER); IPR009030 (SUPERFAMILY); IPR009030 (SUPERFAMILY)	no GO terms	no GO terms	ENOG	Oocyst wall protein	3e-205	Sarcocystidae		0
TGME49_248740	[INTERPRO, BLASTED]	glycine zipper 2TM domain-containing protein	1241	20	0	81.69						IPR038145 (G3DSA:3.30.70.GENE3D)	no GO terms	no GO terms	ENOG	cornified envelope assembly	1.2e-262	Sarcocystidae		0
TGME49_248750	[INTERPRO, BLASTED, MAPPED, ANNOTATED]	putative transmembrane protein	1112	20	0	88.93	1	C:GO:0016020	C:membrane			no IPS match	no IPS match	no IPS match	ENOG		0	Sarcocystidae		0
TGME49_248770	[INTERPRO, BLASTED, MAPPED, ANNOTATED]	putative transmembrane protein	482	20	0	95.3	1	C:GO:0016020	C:membrane			no IPS match	no IPS match	no IPS match	ENOG		6.7e-265	Sarcocystidae		0
TGME49_248790	[INTERPRO, BLASTED]	hypothetical protein TGME49_248790	243	20	1.80469e-176	77.59						no IPS match	no IPS match	no IPS match	ENOG		2.1e-134	Sarcocystidae		0
TGME49_248800	[INTERPRO, BLASTED]	hypothetical protein TGARI_248800	932	14	0	93.14						no IPS match	no IPS match	no IPS match	ENOG		0	Sarcocystidae		0
TGME49_248820	[INTERPRO, BLASTED]	hypothetical protein TGME49_248820	335	8	0	89.13						no IPS match	no IPS match	no IPS match	ENOG		5.4e-181	Sarcocystidae		0
TGME49_248860	[INTERPRO, BLASTED, MAPPED, ANNOTATED]	putative transmembrane protein	464	11	3.24462e-91	93.22	1	C:GO:0016020	C:membrane			no IPS match	no IPS match	no IPS match	ENOG		2.9e-217	Sarcocystidae		0
TGME49_248900	[INTERPRO, BLASTED, MAPPED, ANNOTATED]	putative transmembrane protein	988	11	0	92.35	1	C:GO:0016020	C:membrane			no IPS match	no IPS match	no IPS match	ENOG		0	Sarcocystidae		0
TGME49_248940	[INTERPRO, BLASTED, MAPPED, ANNOTATED]	zinc knuckle protein	502	20	2.25007e-93	89.86	4	P:GO:0009987; F:GO:0003676; F:GO:0008270; C:GO:0043231	P:cellular process; F:nucleic acid binding; F:zinc ion binding; C:intracellular membrane-bounded organelle			PF13917 (PFAM)	no GO terms	no GO terms	KOG,ENOG	Zinc knuckle	6e-67	Sarcocystidae		0
TGME49_249215	[INTERPRO, BLASTED, MAPPED]	heptatricopeptide repeat-containing protein, putative	1348	20	0	70.95	1	C:GO:0000428	C:DNA-directed RNA polymerase complex			no IPS match	no IPS match	no IPS match	ENOG		0	Sarcocystidae		0
TGME49_249230	[INTERPRO, BLASTED, MAPPED, ANNOTATED]	hypothetical protein TGME49_249230	1093	17	0	91.61	3	F:GO:0003677; C:GO:0005634; C:GO:0016020	F:DNA binding; C:nucleus; C:membrane			no IPS match	no IPS match	no IPS match	ENOG		0	Sarcocystidae		0
TGME49_249300	[INTERPRO, BLASTED, MAPPED, ANNOTATED]	putative transmembrane protein	311	20	0	71.23	1	C:GO:0016020	C:membrane			IPR029058 (G3DSA:3.40.50.GENE3D); IPR029058 (SUPERFAMILY)	no GO terms	no GO terms	ENOG		2.2e-168	Sarcocystidae		0
TGME49_249340	[INTERPRO, BLASTED, MAPPED, ANNOTATED]	putative transmembrane protein	937	17	0	71.13	1	C:GO:0016020	C:membrane			no IPS match	no IPS match	no IPS match	ENOG		0	Sarcocystidae		0
TGME49_249400	[INTERPRO, BLASTED]	hypothetical protein TGME49_249400	282	6	0	98.9						no IPS match	no IPS match	no IPS match
TGME49_249410	[INTERPRO, BLASTED]	zinc finger MYM-type protein 5-like	617	20	0	71.58						no IPS match	no IPS match	no IPS match	ENOG	ZnF_TTF	0	Sarcocystidae		0
TGME49_249425	[INTERPRO, BLASTED]	putative proteophosphoglycan 5, related protein	481	20	0	87.17						no IPS match	no IPS match	no IPS match	ENOG	Proteophosphoglycan 5, related	2.5e-139	Sarcocystidae		0
TGME49_249450	[INTERPRO, BLASTED]	hypothetical protein TGPRC2_249450	946	15	0	92.68						no IPS match	no IPS match	no IPS match	ENOG		0	Sarcocystidae		0
TGME49_249490	[INTERPRO, BLASTED]	TPA: hypothetical protein BN1205_002360	2431	20	0	89.77						no IPS match	no IPS match	no IPS match	ENOG		0	Sarcocystidae		0
TGME49_249510	[INTERPRO, BLASTED]	putative transmembrane protein	333	5	0	86.47						no IPS match	no IPS match	no IPS match	ENOG		1.2e-185	Sarcocystidae		0
TGME49_249520	[INTERPRO, BLASTED]	hypothetical protein TGME49_249520	189	9	2.95234e-116	95.07						no IPS match	no IPS match	no IPS match	ENOG		6.4e-70	Sarcocystidae		0
TGME49_249540	[INTERPRO, BLASTED]	hypothetical protein TGME49_249540	1652	16	0	92.22						no IPS match	no IPS match	no IPS match	ENOG		0	Sarcocystidae		0
TGME49_249550	[INTERPRO, BLASTED]	theoredoxin domain containing	1813	20	0	84.7						no IPS match	no IPS match	no IPS match	ENOG		0	Sarcocystidae		0
TGME49_249570	[INTERPRO, BLASTED, MAPPED]	putative transmembrane protein	274	15	1.11214e-105	93.85	1	F:GO:0016740	F:transferase activity			no IPS match	no IPS match	no IPS match	ENOG		9.3e-62	Sarcocystidae		0
TGME49_249575	[INTERPRO, BLASTED]	hypothetical protein TGME49_249575	101	7	3.06253e-60	97.74						no IPS match	no IPS match	no IPS match
TGME49_249600	[INTERPRO, BLASTED, MAPPED, ANNOTATED]	putative transmembrane protein	865	20	0	92.34	1	C:GO:0016020	C:membrane			no IPS match	no IPS match	no IPS match	ENOG		0	Sarcocystidae		0
TGME49_249610	[INTERPRO, BLASTED, MAPPED, ANNOTATED]	putative nuclear cap-binding protein	1201	20	0	96.8	7	P:GO:0000184; P:GO:0006406; P:GO:0050684; F:GO:0000339; F:GO:0003729; C:GO:0005634; C:GO:0005846	P:nuclear-transcribed mRNA catabolic process, nonsense-mediated decay; P:mRNA export from nucleus; P:regulation of mRNA processing; F:RNA cap binding; F:mRNA binding; C:nucleus; C:nuclear cap binding complex			IPR015174 (PFAM); G3DSA:1.25.40.180 (GENE3D); G3DSA:1.25.40.180 (GENE3D); G3DSA:1.25.40.180 (GENE3D); IPR016024 (SUPERFAMILY); IPR016024 (SUPERFAMILY); IPR016024 (SUPERFAMILY)	P:GO:0016070	P:RNA metabolic process	KOG,ENOG	MIF4G like	0	Sarcocystidae		0			K12882	map03013,map03015,map03040
TGME49_249660	[INTERPRO, BLASTED, MAPPED, ANNOTATED]	putative transmembrane protein	660	20	0	84.1	1	C:GO:0016020	C:membrane			PTHR12242 (PANTHER)	C:GO:0016020	C:membrane	ENOG		0	Sarcocystidae		0
TGME49_249665	[INTERPRO, BLASTED]	hypothetical protein TGME49_249665	121	1	3.55893e-68	100						no IPS match	no IPS match	no IPS match
TGME49_249685	[INTERPRO, BLASTED]	hypothetical protein TGME49_249685	221	9	1.00927e-131	98.88						no IPS match	no IPS match	no IPS match
TGME49_249690	[INTERPRO, BLASTED, MAPPED]	hypothetical protein TGME49_249690	568	20	0	83.25	12	P:GO:0008610; P:GO:0008643; P:GO:0034219; P:GO:0055085; P:GO:1902600; F:GO:0005351; F:GO:0005506; F:GO:0016491; F:GO:0022857; F:GO:0030170; F:GO:0047536; C:GO:0016020	P:lipid biosynthetic process; P:carbohydrate transport; P:carbohydrate transmembrane transport; P:transmembrane transport; P:proton transmembrane transport; F:carbohydrate:proton symporter activity; F:iron ion binding; F:oxidoreductase activity; F:transmembrane transporter activity; F:pyridoxal phosphate binding; F:2-aminoadipate transaminase activity; C:membrane			no IPS match	no IPS match	no IPS match	ENOG		6.1E-310	Sarcocystidae		0
TGME49_249698	[INTERPRO, BLASTED, MAPPED, ANNOTATED]	TPA: Nucleic acid-binding protein, putative	238	20	1.96387e-97	83.41	1	C:GO:0016020	C:membrane			IPR012340 (G3DSA:2.40.50.GENE3D); IPR012340 (SUPERFAMILY)	no GO terms	no GO terms	ENOG		0.0017	Eukaryota		0			K07466	map03030,map03420,map03430,map03440,map03460
TGME49_249725	[INTERPRO, BLASTED]	hypothetical protein TGME49_249725	206	5	9.7315e-151	95.3						no IPS match	no IPS match	no IPS match
TGME49_249750	[INTERPRO, BLASTED]	hypothetical protein TGME49_249750	189	7	3.0424e-122	94.76						no IPS match	no IPS match	no IPS match	ENOG		8.5e-107	Sarcocystidae		0
TGME49_249780	[INTERPRO, BLASTED, MAPPED, ANNOTATED]	cyclic phosphodiesterase-like protein	328	13	0	91.84	4	P:GO:0009187; F:GO:0004113	P:cyclic nucleotide metabolic process; F:2',3'-cyclic-nucleotide 3'-phosphodiesterase activity	EC:3.1.4; EC:3.1; EC:3.1.4.37; EC:3	Acting on ester bonds; Acting on ester bonds; 2',3'-cyclic-nucleotide 3'-phosphodiesterase; Hydrolases	G3DSA:3.90.1140.10 (GENE3D); G3DSA:3.90.1140.10 (GENE3D); IPR012386 (PANTHER); IPR009097 (SUPERFAMILY)	P:GO:0009187; F:GO:0004112; F:GO:0004113	P:cyclic nucleotide metabolic process; F:cyclic-nucleotide phosphodiesterase activity; F:2',3'-cyclic-nucleotide 3'-phosphodiesterase activity	ENOG		1.1e-183	Sarcocystidae		0
TGME49_249790	[INTERPRO, BLASTED]	hypothetical protein TGME49_249790	235	20	2.08149e-173	73.2						IPR001792 (PROSITE_PROFILES)	no GO terms	no GO terms	ENOG		3.6e-131	Sarcocystidae		1	F:GO:0003998	F:acylphosphatase activity
TGME49_249800	[INTERPRO, BLASTED, MAPPED, ANNOTATED]	TPA: hypothetical protein BN1205_002030	876	14	0	93.78	2	P:GO:1901647; C:GO:0005654	P:positive regulation of synoviocyte proliferation; C:nucleoplasm			IPR052464 (PANTHER)	no GO terms	no GO terms	ENOG		0	Sarcocystidae		0
TGME49_249860	[INTERPRO, BLASTED, MAPPED, ANNOTATED]	putative centrosomal protein	802	20	0	82.67	6	P:GO:0016192; P:GO:0030837; P:GO:0046907; F:GO:0005515; C:GO:0005737; C:GO:0045098	P:vesicle-mediated transport; P:negative regulation of actin filament polymerization; P:intracellular transport; F:protein binding; C:cytoplasm; C:type III intermediate filament			PTHR34707 (PANTHER)	C:GO:0045098	C:type III intermediate filament	ENOG		0	Sarcocystidae		0
TGME49_249870	[INTERPRO, BLASTED, MAPPED]	C2 domain protein	381	20	0	66.22	8	P:GO:0006508; P:GO:0006869; P:GO:0046928; F:GO:0004197; F:GO:0005509; F:GO:0008289; C:GO:0016020; C:GO:0030672	P:proteolysis; P:lipid transport; P:regulation of neurotransmitter secretion; F:cysteine-type endopeptidase activity; F:calcium ion binding; F:lipid binding; C:membrane; C:synaptic vesicle membrane			IPR000008 (PRINTS); IPR000008 (PFAM); IPR035892 (G3DSA:2.60.40.GENE3D); PIRSR000550-4 (PIRSR); PIRSR000550-2 (PIRSR); PTHR45911 (PANTHER); IPR000008 (PROSITE_PROFILES); cd00030 (CDD); IPR035892 (SUPERFAMILY)	no GO terms	no GO terms	KOG,ENOG	Protein kinase C conserved region 2 (CalB)	1e-167	Sarcocystidae		0
TGME49_249880	[INTERPRO, BLASTED]	amine-terminal domain cyclin	1628	14	0	87.98						G3DSA:1.10.472.10 (GENE3D); IPR006671 (PFAM); IPR036915 (SUPERFAMILY)	no GO terms	no GO terms	ENOG	domain present in cyclins, TFIIB and Retinoblastoma	0	Sarcocystidae		0
TGME49_249890	[INTERPRO, BLASTED]	hypothetical protein TGME49_249890	1702	14	0	90.3						no IPS match	no IPS match	no IPS match	ENOG		0	Sarcocystidae		0
TGME49_249930	[INTERPRO, BLASTED, MAPPED, ANNOTATED]	putative transmembrane protein	219	4	8.04366e-161	87.39	1	C:GO:0016020	C:membrane			no IPS match	no IPS match	no IPS match	ENOG		6.8e-116	Sarcocystidae		0
TGME49_249935	[INTERPRO, BLASTED]	hypothetical protein TGRH88_063690	97	9	1.16802e-42	71.65						no IPS match	no IPS match	no IPS match	ENOG		1.1e-30	Sarcocystidae		0
TGME49_250000	[INTERPRO, BLASTED]	hypothetical protein TGME49_250000	152	2	8.09445e-106	99.01						no IPS match	no IPS match	no IPS match
TGME49_250020	[INTERPRO, BLASTED]	hypothetical protein TGME49_250020	121	6	3.08038e-69	97.8						no IPS match	no IPS match	no IPS match
TGME49_250030	[INTERPRO, BLASTED]	hypothetical protein TGME49_250030	274	12	1.40117e-174	89.9						no IPS match	no IPS match	no IPS match	ENOG		9e-150	Sarcocystidae		0
TGME49_250040	[INTERPRO, BLASTED, MAPPED, ANNOTATED]	putative transmembrane protein	263	12	9.97501e-122	90.8	1	C:GO:0016020	C:membrane			no IPS match	no IPS match	no IPS match	ENOG		8.4e-137	Sarcocystidae		0
TGME49_250050	[INTERPRO, BLASTED, MAPPED, ANNOTATED]	hypothetical protein TGME49_250050	2156	20	0	94.19	1	C:GO:0005737	C:cytoplasm			no IPS match	no IPS match	no IPS match	ENOG		0	Sarcocystidae		0
TGME49_250090	[INTERPRO, BLASTED, MAPPED]	hypothetical protein TGME49_250090	818	16	0	78.09	7	P:GO:0006357; P:GO:0006888; P:GO:0009306; P:GO:0035459; C:GO:0005634; C:GO:0005789; C:GO:0070971	P:regulation of transcription by RNA polymerase II; P:endoplasmic reticulum to Golgi vesicle-mediated transport; P:protein secretion; P:vesicle cargo loading; C:nucleus; C:endoplasmic reticulum membrane; C:endoplasmic reticulum exit site			no IPS match	no IPS match	no IPS match	ENOG		0	Sarcocystidae		0
TGME49_250100	[INTERPRO, BLASTED]	hypothetical protein TGME49_250100	163	3	6.45041e-121	98.98						no IPS match	no IPS match	no IPS match
TGME49_250115	[INTERPRO, BLASTED]	hypothetical protein TGME49_250115	890	20	0	84.44						no IPS match	no IPS match	no IPS match	ENOG		1.9e-116	Sarcocystidae		0
TGME49_250220	[INTERPRO, BLASTED]	hypothetical protein TGME49_250220	391	20	0	83.04						no IPS match	no IPS match	no IPS match	ENOG		7.6e-09	Sarcocystidae		0
TGME49_250500	[INTERPRO, BLASTED]	hypothetical protein TGME49_250500, partial	454	20	0	91.36						no IPS match	no IPS match	no IPS match	ENOG		4.2e-11	Sarcocystidae		0
TGME49_250670	[INTERPRO, BLASTED]	putative proteophosphoglycan protein ppg3	811	20	0	95.77						no IPS match	no IPS match	no IPS match	ENOG		5.8e-19	Sarcocystidae		0
TGME49_250685	[INTERPRO, BLASTED]	hypothetical protein TGME49_250685	83	5	5.86583e-40	98.07						no IPS match	no IPS match	no IPS match
TGME49_250700	[INTERPRO, BLASTED]	hypothetical protein TGME49_250700	1509	20	0	96.04						no IPS match	no IPS match	no IPS match	ENOG		0	Sarcocystidae		0
TGME49_250720	[INTERPRO, BLASTED, MAPPED, ANNOTATED]	putative intraflagellar transport component IFT74/72 protein	606	20	0	77.21	5	P:GO:0035735; F:GO:0048487; C:GO:0005813; C:GO:0030992; C:GO:0031514	P:intraciliary transport involved in cilium assembly; F:beta-tubulin binding; C:centrosome; C:intraciliary transport particle B; C:motile cilium			IPR029602 (PANTHER)	P:GO:0035735; P:GO:0042073; P:GO:0060271; F:GO:0048487; C:GO:0005813; C:GO:0005929; C:GO:0030992	P:intraciliary transport involved in cilium assembly; P:intraciliary transport; P:cilium assembly; F:beta-tubulin binding; C:centrosome; C:cilium; C:intraciliary transport particle B	ENOG	Intraflagellar transport protein component IFT74 72	0	Sarcocystidae		0
TGME49_250790	[INTERPRO, BLASTED]	hypothetical protein TGME49_250790	1264	20	0	96.13						no IPS match	no IPS match	no IPS match	ENOG		0	Sarcocystidae		0
TGME49_250900	[INTERPRO, BLASTED, MAPPED, ANNOTATED]	putative transmembrane protein	348	15	2.19333e-146	91.92	1	C:GO:0016020	C:membrane			no IPS match	no IPS match	no IPS match	ENOG		4.3e-112	Sarcocystidae		0
TGME49_250905	[INTERPRO, BLASTED]	hypothetical protein TGME49_250905	153	1	2.39894e-94	100						no IPS match	no IPS match	no IPS match
TGME49_250910	[INTERPRO, BLASTED, MAPPED]	hypothetical protein TGGT1_250910	496	12	0	91.62	1	C:GO:0016020	C:membrane			no IPS match	no IPS match	no IPS match	ENOG		2.4e-241	Sarcocystidae		0
TGME49_250930	[INTERPRO, BLASTED]	hypothetical protein TGME49_250930	126	2	1.10357e-85	81.75						no IPS match	no IPS match	no IPS match
TGME49_250940	[INTERPRO, BLASTED]	TPA: hypothetical protein BN1205_001050	1494	11	0	95.87						no IPS match	no IPS match	no IPS match	ENOG		0	Sarcocystidae		0
TGME49_251400	[INTERPRO, BLASTED, MAPPED, ANNOTATED]	putative transmembrane protein	668	20	0	87.26	9	P:GO:0032468; P:GO:0032472; P:GO:0070588; P:GO:0071421; F:GO:0005384; F:GO:0015085; C:GO:0000329; C:GO:0005794; C:GO:0009535	P:Golgi calcium ion homeostasis; P:Golgi calcium ion transport; P:calcium ion transmembrane transport; P:manganese ion transmembrane transport; F:manganese ion transmembrane transporter activity; F:calcium ion transmembrane transporter activity; C:fungal-type vacuole membrane; C:Golgi apparatus; C:chloroplast thylakoid membrane			IPR001727 (PFAM); IPR001727 (PANTHER)	F:GO:0046873	F:metal ion transmembrane transporter activity	COG,KOG,ENOG	Uncharacterized protein family UPF0016	0	Sarcocystidae		0
TGME49_251450	[INTERPRO, BLASTED, MAPPED]	hypothetical protein TGME49_251450	2289	16	0	86.98	3	P:GO:0006367; F:GO:0016251; C:GO:0005669	P:transcription initiation at RNA polymerase II promoter; F:RNA polymerase II general transcription initiation factor activity; C:transcription factor TFIID complex			IPR015943 (G3DSA:2.130.10.GENE3D); IPR036322 (SUPERFAMILY)	F:GO:0005515	F:protein binding	ENOG	WD40 repeats	0	Sarcocystidae		0
TGME49_251460	[INTERPRO, BLASTED, MAPPED]	hypothetical protein TGVEG_251460	1490	20	0	94.99	5	P:GO:0000226; F:GO:0005516; F:GO:0008017; C:GO:0005737; C:GO:0005874	P:microtubule cytoskeleton organization; F:calmodulin binding; F:microtubule binding; C:cytoplasm; C:microtubule	EC:2.3.2.26	HECT-type E3 ubiquitin transferase	no IPS match	no IPS match	no IPS match	COG,KOG	ATPase activity	0	Eukaryota	EC:2.3.2.26	0			K10592,K14572,K20478	map03008,map04120
TGME49_251520	[INTERPRO, BLASTED, MAPPED, ANNOTATED]	putative transmembrane protein	232	10	1.50514e-169	73.93	1	C:GO:0016020	C:membrane			no IPS match	no IPS match	no IPS match	ENOG		5e-133	Sarcocystidae		0
TGME49_251530	[INTERPRO, BLASTED]	hypothetical protein TGME49_251530	124	3	2.24375e-84	99.73						no IPS match	no IPS match	no IPS match
TGME49_251560	[INTERPRO, BLASTED]	hypothetical protein TGME49_251560	1731	16	0	89.64						no IPS match	no IPS match	no IPS match	ENOG		0	Sarcocystidae		0
TGME49_251580	[INTERPRO, BLASTED]	hypothetical protein TGME49_251580	357	1	1.53222e-70	100						no IPS match	no IPS match	no IPS match
TGME49_251590	[INTERPRO, BLASTED, MAPPED, ANNOTATED]	putative protease	878	14	0	88.37	4	P:GO:0006508; F:GO:0008233	P:proteolysis; F:peptidase activity	EC:3.4; EC:3	Acting on peptide bonds (peptidases); Hydrolases	no IPS match	no IPS match	no IPS match	ENOG		0	Sarcocystidae		0
TGME49_251610	[INTERPRO, BLASTED, MAPPED, ANNOTATED]	hypothetical protein TGME49_251610	1396	20	0	98.47	1	C:GO:0016020	C:membrane			IPR013783 (G3DSA:2.60.40.GENE3D)	no GO terms	no GO terms	ENOG		0	Sarcocystidae		0
TGME49_251650	[INTERPRO, BLASTED]	hypothetical protein TGME49_251650	157	3	1.70381e-88	98.3						no IPS match	no IPS match	no IPS match	ENOG		1.8e-78	Sarcocystidae		0
TGME49_251660	[INTERPRO, BLASTED]	hypothetical protein TGME49_251660	161	11	5.61302e-75	93						no IPS match	no IPS match	no IPS match	ENOG		1.9e-43	Sarcocystidae		0
TGME49_251665	[INTERPRO, BLASTED]	hypothetical protein TGME49_251665	201	4	5.83923e-148	97.83						no IPS match	no IPS match	no IPS match
TGME49_251770	[INTERPRO, BLASTED, MAPPED, ANNOTATED]	putative transmembrane protein	1265	20	0	76.22	7	P:GO:0006457; F:GO:0005524; F:GO:0051082; F:GO:0140662; C:GO:0005739; C:GO:0009507; C:GO:0016020	P:protein folding; F:ATP binding; F:unfolded protein binding; F:ATP-dependent protein folding chaperone; C:mitochondrion; C:chloroplast; C:membrane			no IPS match	no IPS match	no IPS match	ENOG		0	Sarcocystidae		0
TGME49_251800	[INTERPRO, BLASTED]	hypothetical protein TGME49_251800	313	9	0	86.82						no IPS match	no IPS match	no IPS match	ENOG		1.9e-175	Sarcocystidae		0
TGME49_251840	[INTERPRO, BLASTED, MAPPED]	hypothetical protein TGME49_251840	477	12	0	77.76	3	P:GO:0006627; F:GO:0046872; C:GO:0005739	P:protein processing involved in protein targeting to mitochondrion; F:metal ion binding; C:mitochondrion			no IPS match	no IPS match	no IPS match	ENOG		1.9e-243	Sarcocystidae		0
TGME49_251857	[INTERPRO, BLASTED]	hypothetical protein TGVEG_251857	249	8	9.32208e-138	78.6						no IPS match	no IPS match	no IPS match
TGME49_251860	[INTERPRO, BLASTED]	hypothetical protein TGME49_251860	157	6	2.67266e-114	99.79						no IPS match	no IPS match	no IPS match
TGME49_251885	[INTERPRO, BLASTED, MAPPED]	hypothetical protein TGME49_251885	215	20	5.13465e-135	74.83	5	P:GO:0006457; P:GO:0034551; F:GO:0044183; C:GO:0005739; C:GO:0005759	P:protein folding; P:mitochondrial respiratory chain complex III assembly; F:protein folding chaperone; C:mitochondrion; C:mitochondrial matrix			no IPS match	no IPS match	no IPS match	ENOG		3.6e-93	Apicomplexa		0
TGME49_251890	[INTERPRO, BLASTED]	TPA: hypothetical protein BN1205_000450	1677	15	0	88.28						no IPS match	no IPS match	no IPS match	ENOG		0	Sarcocystidae		0
TGME49_251900	[INTERPRO, BLASTED]	putative transmembrane protein	117	2	1.78008e-14	100						no IPS match	no IPS match	no IPS match	ENOG		8.8e-46	Sarcocystidae		0
TGME49_251910	[INTERPRO, BLASTED]	hypothetical protein TGME49_251910	188	4	1.64118e-110	92.75						PS51257 (PROSITE_PROFILES)	no GO terms	no GO terms	ENOG		5.3e-85	Sarcocystidae		0
TGME49_251920	[INTERPRO, BLASTED, MAPPED, ANNOTATED]	nuclear protein Es2	799	20	0	75.87	1	C:GO:0071013	C:catalytic step 2 spliceosome			IPR019148 (PFAM); IPR019148 (PANTHER)	C:GO:0071013	C:catalytic step 2 spliceosome	KOG,ENOG	Nuclear protein Es2	0	Sarcocystidae		0			K13118
TGME49_252080	[INTERPRO, BLASTED]	hypothetical protein TGME49_252080	140	6	6.18532e-61	99.29						no IPS match	no IPS match	no IPS match
TGME49_252090	[INTERPRO, BLASTED]	hypothetical protein TGME49_252090	68	1	2.39554e-41	100						no IPS match	no IPS match	no IPS match
TGME49_252230	[INTERPRO, BLASTED]	hypothetical protein TGME49_252230	615	18	0	79.67						no IPS match	no IPS match	no IPS match	ENOG		0	Sarcocystidae		0
TGME49_252255	[INTERPRO, BLASTED]	hypothetical protein TGME49_252255	307	3	0	98.8						no IPS match	no IPS match	no IPS match
TGME49_252260	[INTERPRO, BLASTED, MAPPED]	hypothetical protein TGME49_252260	531	17	0	64.11	1	F:GO:0005509	F:calcium ion binding			cd22968 (CDD)	no GO terms	no GO terms	ENOG		3.3E-310	Sarcocystidae		0
TGME49_252280	[INTERPRO, BLASTED, MAPPED, ANNOTATED]	DNA repair protein endonuclease SAE2/CtIP carboxy-terminal protein	1801	15	0	93.35	2	F:GO:0004519	F:endonuclease activity	EC:3.1; EC:3	Acting on ester bonds; Hydrolases	no IPS match	no IPS match	no IPS match	ENOG		0	Sarcocystidae		0
TGME49_252300	[INTERPRO, BLASTED, MAPPED, ANNOTATED]	TPA: hypothetical protein BN1205_056010	1053	20	0	81.73	2	P:GO:0071027; C:GO:0110165	P:nuclear RNA surveillance; C:cellular anatomical entity			no IPS match	no IPS match	no IPS match	ENOG		0	Sarcocystidae		0
TGME49_252310	[INTERPRO, BLASTED, MAPPED, ANNOTATED]	histone-fold-containing protein	239	20	5.44675e-123	70.43	7	P:GO:0006272; P:GO:0006974; P:GO:0031507; F:GO:0031490; F:GO:0046982; C:GO:0008622; C:GO:0008623	P:leading strand elongation; P:DNA damage response; P:heterochromatin formation; F:chromatin DNA binding; F:protein heterodimerization activity; C:epsilon DNA polymerase complex; C:CHRAC			IPR009072 (G3DSA:1.10.20.GENE3D); IPR051377 (PANTHER); IPR009072 (SUPERFAMILY)	P:GO:0006272; P:GO:0006974; P:GO:0031507; F:GO:0031490; F:GO:0046982; C:GO:0008622; C:GO:0008623	P:leading strand elongation; P:DNA damage response; P:heterochromatin formation; F:chromatin DNA binding; F:protein heterodimerization activity; C:epsilon DNA polymerase complex; C:CHRAC	ENOG		1e-112	Sarcocystidae		0
TGME49_252330	[INTERPRO, BLASTED, MAPPED, ANNOTATED]	putative transmembrane protein	382	10	0	91.19	1	C:GO:0016020	C:membrane			no IPS match	no IPS match	no IPS match	ENOG		3.2e-214	Sarcocystidae		0
TGME49_252350	[INTERPRO, BLASTED]	hypothetical protein TGME49_252350	702	11	0	95.98						no IPS match	no IPS match	no IPS match	ENOG		0	Sarcocystidae		0
TGME49_252390	[INTERPRO, BLASTED, MAPPED, ANNOTATED]	putative transmembrane protein	199	5	1.25719e-131	88.59	1	C:GO:0016020	C:membrane			PS51257 (PROSITE_PROFILES)	no GO terms	no GO terms	ENOG		5.4e-104	Sarcocystidae		0
TGME49_252395	[INTERPRO, BLASTED]	hypothetical protein TGME49_252395	1822	13	0	94.48						no IPS match	no IPS match	no IPS match
TGME49_252450	[INTERPRO, BLASTED, MAPPED, ANNOTATED]	putative transmembrane protein	311	8	1.12453e-157	97.6	1	C:GO:0016020	C:membrane			no IPS match	no IPS match	no IPS match
TGME49_252480	[INTERPRO, BLASTED]	hypothetical protein TGCAST_252480	295	20	3.99892e-150	77.21						no IPS match	no IPS match	no IPS match	ENOG		7e-132	Sarcocystidae		0
TGME49_252860	[INTERPRO, BLASTED, MAPPED, ANNOTATED]	putative transmembrane protein	248	5	2.96251e-124	99.44	1	C:GO:0016020	C:membrane			no IPS match	no IPS match	no IPS match	ENOG		3e-112	Sarcocystidae		0
TGME49_252870	[INTERPRO, BLASTED, MAPPED, ANNOTATED]	hypothetical protein TGME49_252870	1786	14	0	92.01	3	P:GO:0048024; F:GO:0003723; C:GO:0005681	P:regulation of mRNA splicing, via spliceosome; F:RNA binding; C:spliceosomal complex			no IPS match	no IPS match	no IPS match	ENOG		0	Sarcocystidae		0
TGME49_252880	[INTERPRO, BLASTED, MAPPED, ANNOTATED]	hypothetical protein TGME49_252880	3168	20	0	99.01	7	P:GO:0007076; P:GO:0007186; F:GO:0003682; C:GO:0000785; C:GO:0000793; C:GO:0000796; C:GO:0005856	P:mitotic chromosome condensation; P:G protein-coupled receptor signaling pathway; F:chromatin binding; C:chromatin; C:condensed chromosome; C:condensin complex; C:cytoskeleton			G3DSA:1.20.1170.10 (GENE3D); G3DSA:6.10.250.90 (GENE3D); PTHR23159 (PANTHER); IPR015898 (PROSITE_PROFILES)	P:GO:0007186	P:G protein-coupled receptor signaling pathway	ENOG	response to salt stress	0	Sarcocystidae		0
TGME49_252890	[INTERPRO, BLASTED]	hypothetical protein TGME49_252890	155	9	1.96447e-48	98.92						no IPS match	no IPS match	no IPS match
TGME49_252990	[INTERPRO, BLASTED]	RNB family domain-containing protein	361	12	7.82451e-162	87.92						no IPS match	no IPS match	no IPS match	ENOG		4.4e-152	Sarcocystidae		0
TGME49_253020	[INTERPRO, BLASTED]	hypothetical protein TGME49_253020	466	20	0	84.97						G3DSA:3.70.10.10 (GENE3D)	no GO terms	no GO terms	ENOG		5.4e-211	Sarcocystidae		0
TGME49_253080	[INTERPRO, BLASTED, MAPPED]	putative replication protein A2	278	20	3.80472e-157	73.19	3	C:GO:0000781; C:GO:0005634; C:GO:0005694	C:chromosome, telomeric region; C:nucleus; C:chromosome			IPR012340 (G3DSA:2.40.50.GENE3D); IPR012340 (SUPERFAMILY)	no GO terms	no GO terms	ENOG	Replication protein A2	2.7e-157	Sarcocystidae		0			K10739	map03030,map03420,map03430,map03440,map03460
TGME49_253100	[INTERPRO, BLASTED, MAPPED, ANNOTATED]	putative transmembrane protein	519	12	0	80.51	1	C:GO:0016020	C:membrane			no IPS match	no IPS match	no IPS match	ENOG		2e-291	Sarcocystidae		0
TGME49_253140	[INTERPRO, BLASTED]	hypothetical protein TGME49_253140	1519	16	0	87.67						no IPS match	no IPS match	no IPS match	ENOG		0	Sarcocystidae		0
TGME49_253150	[INTERPRO, BLASTED, MAPPED, ANNOTATED]	putative oxidoreductase	1318	20	0	74.79	8	P:GO:0019285; F:GO:0008812; F:GO:0050660; C:GO:0005743	P:glycine betaine biosynthetic process from choline; F:choline dehydrogenase activity; F:flavin adenine dinucleotide binding; C:mitochondrial inner membrane	EC:1.1; EC:1; EC:1.1.99.1	Acting on the CH-OH group of donors; Oxidoreductases; choline dehydrogenase	IPR007867 (PFAM); IPR036188 (G3DSA:3.50.50.GENE3D); IPR036188 (G3DSA:3.50.50.GENE3D); IPR036188 (G3DSA:3.50.50.GENE3D); PIRSR000137-2 (PIRSR); SSF54373 (SUPERFAMILY); IPR036188 (SUPERFAMILY)	F:GO:0016614	F:oxidoreductase activity, acting on CH-OH group of donors	COG,KOG,ENOG	GMC oxidoreductase	0	Sarcocystidae		0
TGME49_253160	[INTERPRO, BLASTED]	hypothetical protein TGME49_253160	433	15	0	93.9						no IPS match	no IPS match	no IPS match	ENOG		8.4e-134	Sarcocystidae		0
TGME49_253180	[INTERPRO, BLASTED]	hypothetical protein TGME49_253180	127	10	4.79392e-85	92.95						no IPS match	no IPS match	no IPS match
TGME49_253300	[INTERPRO, BLASTED, MAPPED, ANNOTATED]	putative transmembrane protein	534	20	0	62.84	1	C:GO:0016020	C:membrane			cd22997 (CDD)	no GO terms	no GO terms	KOG	procollagen-lysine 5-dioxygenase activity	2.4e-292	Eukaryota		0			K03355	map04110,map04111,map04113,map04114,map04120,map04914,map05166
TGME49_253310	[INTERPRO, BLASTED, MAPPED, ANNOTATED]	hypothetical protein TGME49_253310	844	15	0	86.52	9	P:GO:0030833; P:GO:0048813; P:GO:0051489; F:GO:0003785; F:GO:0051015; C:GO:0005634; C:GO:0030027; C:GO:0030425; C:GO:0032433	P:regulation of actin filament polymerization; P:dendrite morphogenesis; P:regulation of filopodium assembly; F:actin monomer binding; F:actin filament binding; C:nucleus; C:lamellipodium; C:dendrite; C:filopodium tip			G3DSA:2.40.50.100 (GENE3D); IPR039169 (PANTHER); IPR011053 (SUPERFAMILY)	C:GO:0005634	C:nucleus	ENOG		0	Sarcocystidae		0
TGME49_253320	[INTERPRO, BLASTED, MAPPED]	hypothetical protein TGME49_253320	543	20	0	80.82	2	F:GO:0000976; C:GO:0005634	F:transcription cis-regulatory region binding; C:nucleus			no IPS match	no IPS match	no IPS match	ENOG		6.8e-266	Sarcocystidae		0
TGME49_253390	[INTERPRO, BLASTED, MAPPED, ANNOTATED]	putative transmembrane protein	629	19	0	59.22	1	C:GO:0016020	C:membrane			cd22997 (CDD)	no GO terms	no GO terms	ENOG		8.5e-212	Sarcocystidae		0
TGME49_253400	[INTERPRO, BLASTED, MAPPED, ANNOTATED]	glucosidase II beta subunit-like protein	964	20	0	96.25	4	P:GO:0001889; P:GO:0006491; C:GO:0005794; C:GO:0017177	P:liver development; P:N-glycan processing; C:Golgi apparatus; C:glucosidase II complex			IPR009011 (G3DSA:2.70.130.GENE3D); IPR036607 (PFAM); IPR039794 (PANTHER); IPR044865 (PROSITE_PROFILES); IPR009011 (SUPERFAMILY)	P:GO:0006491; C:GO:0017177	P:N-glycan processing; C:glucosidase II complex	ENOG	Glucosidase II beta subunit-like protein	0	Sarcocystidae		0
TGME49_253410	[INTERPRO, BLASTED, MAPPED, ANNOTATED]	putative transmembrane protein	463	12	0	89.21	1	C:GO:0016020	C:membrane			no IPS match	no IPS match	no IPS match	ENOG		3.6e-215	Sarcocystidae		0
TGME49_253460	[INTERPRO, BLASTED]	hypothetical protein TGME49_253460	193	6	3.74015e-115	95.14						no IPS match	no IPS match	no IPS match	ENOG		5.7e-82	Sarcocystidae		0
TGME49_253490	[INTERPRO, BLASTED, MAPPED, ANNOTATED]	hypothetical protein TGME49_253490	1950	20	0	82.49	5	P:GO:0030150; P:GO:0045039; F:GO:0008320; F:GO:0030943; C:GO:0005741	P:protein import into mitochondrial matrix; P:protein insertion into mitochondrial inner membrane; F:protein transmembrane transporter activity; F:mitochondrion targeting sequence binding; C:mitochondrial outer membrane			no IPS match	no IPS match	no IPS match	ENOG		0	Sarcocystidae		0
TGME49_253540	[INTERPRO, BLASTED]	hypothetical protein TGME49_253540	747	13	0	92.32						IPR011989 (G3DSA:1.25.10.GENE3D)	no GO terms	no GO terms	ENOG		0	Sarcocystidae		0
TGME49_253560	[INTERPRO, BLASTED]	hypothetical protein TGME49_253560	1904	13	0	91.9						no IPS match	no IPS match	no IPS match	ENOG		0	Sarcocystidae		0
TGME49_253570	[INTERPRO, BLASTED]	hypothetical protein TGME49_253570	318	14	6.84654e-169	78.99						no IPS match	no IPS match	no IPS match	ENOG		1.5e-164	Sarcocystidae		0
TGME49_253615	[INTERPRO, BLASTED]	hypothetical protein TGARI_253615	2436	18	0	83.66						no IPS match	no IPS match	no IPS match	ENOG		0	Sarcocystidae		0
TGME49_253640	[INTERPRO, BLASTED, MAPPED, ANNOTATED]	cation channel family transporter	230	18	2.53107e-166	71.56	3	P:GO:0034220; F:GO:0005216; C:GO:0016020	P:monoatomic ion transmembrane transport; F:monoatomic ion channel activity; C:membrane			IPR005821 (PFAM); IPR027359 (G3DSA:1.20.120.GENE3D); PTHR38483 (PANTHER); SSF81324 (SUPERFAMILY)	P:GO:0006811; P:GO:0055085; F:GO:0005216; C:GO:0016020	P:monoatomic ion transport; P:transmembrane transport; F:monoatomic ion channel activity; C:membrane	ENOG		1.1e-121	Sarcocystidae		0
TGME49_253690	[INTERPRO, BLASTED, MAPPED, ANNOTATED]	putative transmembrane protein	119	19	7.2803e-64	75.63	1	C:GO:0016020	C:membrane			no IPS match	no IPS match	no IPS match	ENOG		1.4e-59	Sarcocystidae		0
TGME49_253710	[INTERPRO, BLASTED, MAPPED, ANNOTATED]	putative transmembrane protein	1037	20	0	75.83	10	P:GO:0046512; F:GO:0017050; C:GO:0005737; C:GO:0016020; C:GO:0043231	P:sphingosine biosynthetic process; F:D-erythro-sphingosine kinase activity; C:cytoplasm; C:membrane; C:intracellular membrane-bounded organelle	EC:2.7.1; EC:2.7.1.91; EC:2.7; EC:2	Transferring phosphorus-containing groups; sphingosine kinase; Transferring phosphorus-containing groups; Transferases	G3DSA:2.60.200.40 (GENE3D); IPR017438 (G3DSA:3.40.50.GENE3D); IPR016064 (SUPERFAMILY); IPR016064 (SUPERFAMILY)	no GO terms	no GO terms	ENOG		0	Sarcocystidae		0
TGME49_253740	[INTERPRO, BLASTED]	hypothetical protein TGME49_253740	987	13	0	89.93						no IPS match	no IPS match	no IPS match	ENOG		0	Sarcocystidae		0
TGME49_253755	[INTERPRO, BLASTED, MAPPED, ANNOTATED]	putative transmembrane protein	170	6	3.33103e-96	99.14	1	C:GO:0016020	C:membrane			no IPS match	no IPS match	no IPS match
TGME49_253760	[INTERPRO, BLASTED]	hypothetical protein TGME49_253760	99	4	4.80256e-50	99.49						no IPS match	no IPS match	no IPS match
TGME49_253770	[INTERPRO, BLASTED]	hypothetical protein TGME49_253770	146	6	5.12236e-103	98.67						no IPS match	no IPS match	no IPS match	ENOG		2.4e-48	Sarcocystidae		0
TGME49_253810	[INTERPRO, BLASTED]	hypothetical protein TGME49_253810	1306	14	0	88.89						no IPS match	no IPS match	no IPS match	ENOG		0	Sarcocystidae		0
TGME49_253820	[INTERPRO, BLASTED]	IMP1-like protein, putative	226	20	1.25631e-164	59.7						IPR040955 (PFAM); IPR040785 (PFAM)	no GO terms	no GO terms	ENOG		1.3e-122	Sarcocystidae		0
TGME49_253830	[INTERPRO, BLASTED]	hypothetical protein TGME49_253830	309	20	0	83.26						no IPS match	no IPS match	no IPS match	ENOG		5.7e-177	Sarcocystidae		0
TGME49_253870	[INTERPRO, BLASTED]	hypothetical protein TGME49_253870	4851	16	0	89.98						no IPS match	no IPS match	no IPS match	ENOG		0	Sarcocystidae		0
TGME49_253910	[INTERPRO, BLASTED]	hypothetical protein TGME49_253910	887	11	0	90.49						no IPS match	no IPS match	no IPS match	ENOG		0	Sarcocystidae		0
TGME49_253970	[INTERPRO, BLASTED]	hypothetical protein TGME49_253970	722	10	0	93.8						no IPS match	no IPS match	no IPS match	ENOG		6.0E-310	Sarcocystidae		0
TGME49_253990	[INTERPRO, BLASTED, MAPPED, ANNOTATED]	hypothetical protein TGME49_253990	2197	20	0	93.78	6	P:GO:0000122; P:GO:0006325; F:GO:0003682; F:GO:0035064; C:GO:0005634; C:GO:0005721	P:negative regulation of transcription by RNA polymerase II; P:chromatin organization; F:chromatin binding; F:methylated histone binding; C:nucleus; C:pericentric heterochromatin			no IPS match	no IPS match	no IPS match	ENOG		0	Sarcocystidae		0
TGME49_254040	[INTERPRO, BLASTED]	hypothetical protein TGME49_254040	157	3	3.64807e-102	99.57						no IPS match	no IPS match	no IPS match	ENOG		4e-86	Sarcocystidae		0
TGME49_254070	[INTERPRO, BLASTED, MAPPED, ANNOTATED]	putative transmembrane protein	240	20	6.46313e-173	65.56	1	C:GO:0016020	C:membrane			no IPS match	no IPS match	no IPS match	ENOG		1.5e-124	Sarcocystidae		0
TGME49_254090	[INTERPRO, BLASTED, MAPPED, ANNOTATED]	cytochrome b5-like heme/steroid-binding domain protein	712	20	0	80.66	3	F:GO:0020037; C:GO:0016020; C:GO:0043231	F:heme binding; C:membrane; C:intracellular membrane-bounded organelle			IPR036400 (G3DSA:3.10.120.GENE3D); IPR001199 (PFAM); PIRSR005149-50 (PIRSR); IPR050668 (PANTHER); IPR001199 (PROSITE_PROFILES); IPR036400 (SUPERFAMILY)	F:GO:0020037; C:GO:0016020; C:GO:0043231	F:heme binding; C:membrane; C:intracellular membrane-bounded organelle	ENOG	Cytochrome b5-like Heme/Steroid binding domain	0	Sarcocystidae		0
TGME49_254135	[INTERPRO, BLASTED]	hypothetical protein TGME49_254135	1353	17	0	88.83						no IPS match	no IPS match	no IPS match	ENOG		0	Sarcocystidae		0
TGME49_254150	[INTERPRO, BLASTED]	hypothetical protein TGME49_254150	719	12	0	89.12						no IPS match	no IPS match	no IPS match	ENOG		0	Sarcocystidae		0
TGME49_254160	[INTERPRO, BLASTED]	hypothetical protein TGME49_254160	3740	20	0	97.92						IPR036872 (G3DSA:1.10.418.GENE3D)	no GO terms	no GO terms	ENOG		0	Sarcocystidae		0
TGME49_254230	[INTERPRO, BLASTED, MAPPED]	hypothetical protein TGME49_254230	656	20	0	89.72	5	P:GO:0006614; F:GO:0000976; F:GO:0008312; C:GO:0005634; C:GO:0048500	P:SRP-dependent cotranslational protein targeting to membrane; F:transcription cis-regulatory region binding; F:7S RNA binding; C:nucleus; C:signal recognition particle			no IPS match	no IPS match	no IPS match	ENOG		2.4e-305	Sarcocystidae		0
TGME49_254270	[INTERPRO, BLASTED, MAPPED, ANNOTATED]	TLC domain protein	369	20	0	71.81	3	P:GO:0055088; C:GO:0005783; C:GO:0016020	P:lipid homeostasis; C:endoplasmic reticulum; C:membrane			IPR006634 (PFAM); IPR050846 (PANTHER); IPR006634 (PROSITE_PROFILES)	P:GO:0055088; C:GO:0005783; C:GO:0016020	P:lipid homeostasis; C:endoplasmic reticulum; C:membrane	ENOG	TLC domain	1.5e-192	Sarcocystidae		0
TGME49_254290	[INTERPRO, BLASTED]	hypothetical protein TGME49_254290	1851	14	0	89.44						no IPS match	no IPS match	no IPS match	ENOG		0	Sarcocystidae		0
TGME49_254300	[INTERPRO, BLASTED, MAPPED]	hypothetical protein TGME49_254300	1776	20	0	81.18	2	C:GO:0005654; C:GO:0005730	C:nucleoplasm; C:nucleolus			no IPS match	no IPS match	no IPS match	ENOG		0	Sarcocystidae		0
TGME49_254460	[INTERPRO, BLASTED, MAPPED, ANNOTATED]	dna repair protein rad14	208	15	4.8017e-99	78.06	7	P:GO:0000715; P:GO:0006284; P:GO:0070914; P:GO:1901255; F:GO:0003684; F:GO:0046872; C:GO:0000110	P:nucleotide-excision repair, DNA damage recognition; P:base-excision repair; P:UV-damage excision repair; P:nucleotide-excision repair involved in interstrand cross-link repair; F:damaged DNA binding; F:metal ion binding; C:nucleotide-excision repair factor 1 complex			IPR037129 (G3DSA:3.90.530.GENE3D); IPR022656 (PFAM); IPR000465 (PANTHER); cd21075 (CDD); IPR009061 (SUPERFAMILY)	P:GO:0000715; P:GO:0006284; P:GO:0006289; P:GO:0033683; P:GO:0070914; P:GO:1901255; F:GO:0003684; C:GO:0000110	P:nucleotide-excision repair, DNA damage recognition; P:base-excision repair; P:nucleotide-excision repair; P:obsolete nucleotide-excision repair, DNA incision; P:UV-damage excision repair; P:nucleotide-excision repair involved in interstrand cross-link repair; F:damaged DNA binding; C:nucleotide-excision repair factor 1 complex	ENOG	XPA protein C-terminus	4.5e-101	Sarcocystidae		0
TGME49_254485	[INTERPRO, BLASTED]	hypothetical protein TGME49_254485	118	8	1.08458e-78	98.16						no IPS match	no IPS match	no IPS match
TGME49_254530	[INTERPRO, BLASTED, MAPPED, ANNOTATED]	hypothetical protein TGME49_254530	1848	19	0	91.36	4	P:GO:0001708; P:GO:0006357; F:GO:0000978; F:GO:0000981	P:cell fate specification; P:regulation of transcription by RNA polymerase II; F:RNA polymerase II cis-regulatory region sequence-specific DNA binding; F:DNA-binding transcription factor activity, RNA polymerase II-specific			no IPS match	no IPS match	no IPS match	ENOG		0	Sarcocystidae		0
TGME49_254570	[INTERPRO, BLASTED]	hypothetical protein TGME49_254570	1972	20	0	97.62						no IPS match	no IPS match	no IPS match	ENOG		0	Sarcocystidae		0
TGME49_254590	[INTERPRO, BLASTED, MAPPED]	hypothetical protein TGME49_254590	125	20	4.04959e-88	63.3	10	P:GO:0006811; P:GO:0035725; P:GO:0055085; P:GO:0086010; F:GO:0005248; F:GO:0005261; F:GO:0005509; C:GO:0001518; C:GO:0005886; C:GO:0016020	P:monoatomic ion transport; P:sodium ion transmembrane transport; P:transmembrane transport; P:membrane depolarization during action potential; F:voltage-gated sodium channel activity; F:monoatomic cation channel activity; F:calcium ion binding; C:voltage-gated sodium channel complex; C:plasma membrane; C:membrane			no IPS match	no IPS match	no IPS match	ENOG		7.4e-67	Sarcocystidae		0
TGME49_254603	[INTERPRO, BLASTED]	hypothetical protein TGME49_254603	306	6	0	93.36						PS51257 (PROSITE_PROFILES)	no GO terms	no GO terms
TGME49_254606	[INTERPRO, BLASTED]	hypothetical protein TGME49_254606	132	4	8.20278e-94	99.24						no IPS match	no IPS match	no IPS match
TGME49_254625	[INTERPRO, BLASTED]	hypothetical protein TGVAND_254625	735	11	0	90.46						no IPS match	no IPS match	no IPS match
TGME49_254635	[INTERPRO, BLASTED]	hypothetical protein TGME49_254635	188	5	9.11462e-134	99.47						no IPS match	no IPS match	no IPS match
TGME49_254670	[INTERPRO, BLASTED, MAPPED, ANNOTATED]	putative transmembrane protein	139	20	9.49865e-97	61.11	1	C:GO:0016020	C:membrane			no IPS match	no IPS match	no IPS match	ENOG		6.3e-67	Apicomplexa		0
TGME49_254680	[INTERPRO, BLASTED]	putative transmembrane protein	128	4	3.19133e-74	86.97						no IPS match	no IPS match	no IPS match	ENOG		1.9e-65	Sarcocystidae		0
TGME49_254760	[INTERPRO, BLASTED, MAPPED, ANNOTATED]	DUF4392 domain-containing protein	383	20	0	63.75	4	P:GO:0006536; F:GO:0047820	P:glutamate metabolic process; F:D-glutamate cyclase activity	EC:4.2.1; EC:4.2; EC:4.2.1.48; EC:4	Carbon-oxygen lyases; Carbon-oxygen lyases; D-glutamate cyclase; Lyases	IPR025504 (PFAM); G3DSA:3.90.1640.20 (GENE3D); PTHR32022 (PANTHER)	no GO terms	no GO terms	ENOG	Domain of unknown function (DUF4392)	2.3e-215	Sarcocystidae		0
TGME49_254780	[INTERPRO, BLASTED]	secreted ookinete protein, putative	181	20	8.13557e-88	74.4						no IPS match	no IPS match	no IPS match	ENOG		1.1e-63	Sarcocystidae		0
TGME49_254790	[INTERPRO, BLASTED]	toxoplasma gondii family d protein	1539	20	0	71.72						no IPS match	no IPS match	no IPS match	ENOG		0	Sarcocystidae		0
TGME49_254810	[INTERPRO, BLASTED, MAPPED, ANNOTATED]	heptatricopeptide repeat-containing protein, putative	1570	20	0	75.62	7	P:GO:0000963; P:GO:0044528; P:GO:1901259; F:GO:0003723; C:GO:0005759; C:GO:0009507; C:GO:0035770	P:mitochondrial RNA processing; P:regulation of mitochondrial mRNA stability; P:chloroplast rRNA processing; F:RNA binding; C:mitochondrial matrix; C:chloroplast; C:ribonucleoprotein granule			no IPS match	no IPS match	no IPS match	ENOG		0	Sarcocystidae		0
TGME49_254820	[INTERPRO, BLASTED]	hypothetical protein TGME49_254820	569	12	0	94.98						no IPS match	no IPS match	no IPS match	ENOG		4.3e-279	Sarcocystidae		0
TGME49_254830	[INTERPRO, BLASTED, MAPPED]	hypothetical protein TGME49_254830	1221	20	0	88.24	2	C:GO:0005634; C:GO:0035861	C:nucleus; C:site of double-strand break			IPR029063 (G3DSA:3.40.50.GENE3D)	no GO terms	no GO terms	ENOG	chromatin binding	0	Sarcocystidae		0
TGME49_254860	[INTERPRO, BLASTED]	hypothetical protein TGME49_254860	1799	15	0	92.05						no IPS match	no IPS match	no IPS match	ENOG		0	Sarcocystidae		0
TGME49_254870	[INTERPRO, BLASTED, MAPPED]	hypothetical protein TGME49_254870	428	20	0	72.58	2	F:GO:0017018; C:GO:0016020	F:myosin phosphatase activity; C:membrane			G3DSA:2.60.60.30 (GENE3D)	no GO terms	no GO terms	ENOG		2.3e-240	Sarcocystidae		0
TGME49_254910	[INTERPRO, BLASTED, MAPPED]	hypothetical protein TGME49_254910	965	17	0	75.25	1	C:GO:0016020	C:membrane			no IPS match	no IPS match	no IPS match	ENOG		0	Sarcocystidae		0
TGME49_254920	[INTERPRO, BLASTED, MAPPED, ANNOTATED]	putative transmembrane protein	369	11	0	93.73	1	C:GO:0016020	C:membrane			no IPS match	no IPS match	no IPS match	ENOG		6.8e-209	Sarcocystidae		0
TGME49_254930	[INTERPRO, BLASTED, MAPPED, ANNOTATED]	putative transmembrane protein	1201	20	0	83.1	1	C:GO:0016020	C:membrane			no IPS match	no IPS match	no IPS match	ENOG		0	Sarcocystidae		0
TGME49_254960	[INTERPRO, BLASTED, MAPPED]	hypothetical protein TGME49_254960	1465	11	0	95.4	1	C:GO:0016020	C:membrane			no IPS match	no IPS match	no IPS match	ENOG		0	Sarcocystidae		0
TGME49_255160	[INTERPRO, BLASTED]	hypothetical protein TGME49_255160	1159	10	0	87.43						no IPS match	no IPS match	no IPS match	ENOG		1.6e-219	Sarcocystidae		0
TGME49_255170	[INTERPRO, BLASTED]	hypothetical protein TGME49_255170	1382	12	0	87.78						no IPS match	no IPS match	no IPS match	ENOG		0	Sarcocystidae		0
TGME49_255175	[INTERPRO, BLASTED]	hypothetical protein TGME49_255175	102	1	2.38347e-69	100						no IPS match	no IPS match	no IPS match
TGME49_255195	[INTERPRO, BLASTED]	TPA: hypothetical protein BN1205_079190	499	12	0	96.39						G3DSA:3.40.50.1460 (GENE3D)	no GO terms	no GO terms	COG,ENOG	WD-40 repeat	0.088	Alphaproteobacteria		0			K07126
TGME49_255240	[INTERPRO, BLASTED, MAPPED, ANNOTATED]	condensin complex subunit 1	2466	20	0	95.37	6	P:GO:0007076; P:GO:0010032; P:GO:0051301; F:GO:0042393; C:GO:0000779; C:GO:0005634	P:mitotic chromosome condensation; P:meiotic chromosome condensation; P:cell division; F:histone binding; C:condensed chromosome, centromeric region; C:nucleus			IPR032682 (PFAM); IPR026971 (PANTHER); IPR016024 (SUPERFAMILY)	P:GO:0007076; P:GO:0010032; F:GO:0042393; C:GO:0000779; C:GO:0000796	P:mitotic chromosome condensation; P:meiotic chromosome condensation; F:histone binding; C:condensed chromosome, centromeric region; C:condensin complex	COG,KOG,ENOG	non-SMC mitotic condensation complex subunit 1	0	Sarcocystidae		0
TGME49_255300	[INTERPRO, BLASTED]	hypothetical protein TGME49_255300	2496	17	0	91.22						no IPS match	no IPS match	no IPS match	ENOG		0	Sarcocystidae		0
TGME49_255330	[INTERPRO, BLASTED]	putative CD8+ T cell target antigen Tp2	327	20	0	85.01						no IPS match	no IPS match	no IPS match	ENOG		3.6e-137	Sarcocystidae		0
TGME49_255360	[INTERPRO, BLASTED, MAPPED]	putative integral membrane protein	211	19	4.04786e-113	71.43	6	P:GO:0017148; P:GO:0090071; F:GO:0003723; F:GO:0043023; C:GO:0005634; C:GO:0005739	P:negative regulation of translation; P:negative regulation of ribosome biogenesis; F:RNA binding; F:ribosomal large subunit binding; C:nucleus; C:mitochondrion			no IPS match	no IPS match	no IPS match	ENOG	Encoded by	2.9e-103	Sarcocystidae		0
TGME49_255380	[INTERPRO, BLASTED]	hypothetical protein TGVAND_255380	263	5	1.32004e-53	94.47						no IPS match	no IPS match	no IPS match	ENOG		1.6e-98	Sarcocystidae		0
TGME49_255400	[INTERPRO, BLASTED, MAPPED, ANNOTATED]	putative transmembrane protein	311	10	2.45291e-131	89.71	3	P:GO:0019216; C:GO:0005739; C:GO:0016020	P:regulation of lipid metabolic process; C:mitochondrion; C:membrane			IPR010754 (PFAM)	no GO terms	no GO terms	ENOG	Optic atrophy 3 protein (OPA3)	2.8e-123	Sarcocystidae		0
TGME49_255410	[INTERPRO, BLASTED, MAPPED, ANNOTATED]	putative transmembrane protein	165	12	7.7263e-99	70.15	1	C:GO:0016020	C:membrane			no IPS match	no IPS match	no IPS match	ENOG		1e-84	Sarcocystidae		0
TGME49_255440	[INTERPRO, BLASTED, MAPPED]	hypothetical protein TGME49_255440	571	10	0	83.19	8	P:GO:0006626; P:GO:0007005; P:GO:0015031; C:GO:0001401; C:GO:0005737; C:GO:0005739; C:GO:0005741; C:GO:0016020	P:protein targeting to mitochondrion; P:mitochondrion organization; P:protein transport; C:SAM complex; C:cytoplasm; C:mitochondrion; C:mitochondrial outer membrane; C:membrane			no IPS match	no IPS match	no IPS match	ENOG		4.3e-255	Sarcocystidae		0
TGME49_255490	[INTERPRO, BLASTED]	hypothetical protein TGCOUG_255490	453	8	9.64478e-145	80.25						no IPS match	no IPS match	no IPS match	ENOG		1.7e-145	Sarcocystidae		0
TGME49_255635	[INTERPRO, BLASTED, MAPPED, ANNOTATED]	RNA polymerase III transcription factor (TF)IIIC subunit	641	20	0	90.3	6	P:GO:0006384; F:GO:0001002; F:GO:0001003; C:GO:0000127; C:GO:0005634; C:GO:0016020	P:transcription initiation at RNA polymerase III promoter; F:RNA polymerase III type 1 promoter sequence-specific DNA binding; F:RNA polymerase III type 2 promoter sequence-specific DNA binding; C:transcription factor TFIIIC complex; C:nucleus; C:membrane			IPR041499 (PFAM); IPR042536 (G3DSA:3.30.200.GENE3D); IPR019136 (PFAM); IPR040454 (PANTHER)	P:GO:0006384; F:GO:0001002; F:GO:0001003; C:GO:0000127	P:transcription initiation at RNA polymerase III promoter; F:RNA polymerase III type 1 promoter sequence-specific DNA binding; F:RNA polymerase III type 2 promoter sequence-specific DNA binding; C:transcription factor TFIIIC complex	KOG,ENOG	RNA polymerase III transcription factor (TF)IIIC subunit	3.3e-251	Sarcocystidae		0			K15202
TGME49_255700	[INTERPRO, BLASTED, MAPPED]	putative ULK kinase	3696	16	0	86.51	9	P:GO:0035556; F:GO:0004672; F:GO:0004683; F:GO:0005516; F:GO:0005524; F:GO:0009931; F:GO:0016301; C:GO:0005634; C:GO:0005737	P:intracellular signal transduction; F:protein kinase activity; F:calmodulin-dependent protein kinase activity; F:calmodulin binding; F:ATP binding; F:calcium-dependent protein serine/threonine kinase activity; F:kinase activity; C:nucleus; C:cytoplasm			no IPS match	no IPS match	no IPS match	ENOG		0	Sarcocystidae		0
TGME49_255715	[INTERPRO, BLASTED]	hypothetical protein TGME49_255715	171	5	9.70218e-123	89.92						no IPS match	no IPS match	no IPS match
TGME49_255730	[INTERPRO, BLASTED]	TPA: hypothetical protein BN1205_078330	1141	11	0	86.98						no IPS match	no IPS match	no IPS match	ENOG		1.5e-270	Sarcocystidae		0
TGME49_255880	[INTERPRO, BLASTED]	hypothetical protein TGME49_255880	787	20	0	80.35						G3DSA:2.60.270.50 (GENE3D)	no GO terms	no GO terms	ENOG		0	Sarcocystidae		0
TGME49_255895	[INTERPRO, BLASTED, MAPPED]	Bax inhibitor 1, related protein	556	13	0	87.29	2	P:GO:0043066; C:GO:0016020	P:negative regulation of apoptotic process; C:membrane			no IPS match	no IPS match	no IPS match	KOG,ENOG	Inhibitor of apoptosis-promoting Bax1	8.5e-163	Sarcocystidae		0			K21889
TGME49_255930	[INTERPRO, BLASTED]	hypothetical protein TGME49_255930	439	13	0	87.24						no IPS match	no IPS match	no IPS match	ENOG		6.8e-240	Sarcocystidae		0
TGME49_255940	[INTERPRO, BLASTED, MAPPED, ANNOTATED]	zinc finger protein, putative	320	20	0	84.89	1	C:GO:0005829	C:cytosol			IPR036671 (G3DSA:3.10.660.GENE3D); IPR007872 (PFAM); IPR007872 (PROSITE_PROFILES); IPR036671 (SUPERFAMILY)	no GO terms	no GO terms	ENOG	CSL zinc finger	1.3e-171	Sarcocystidae		0
TGME49_255960	[INTERPRO, BLASTED]	hypothetical protein TGVEG_255960	2220	20	0	80.84						IPR001357 (PROSITE_PROFILES)	no GO terms	no GO terms	ENOG	Encoded by	0	Sarcocystidae		0
TGME49_255980	[INTERPRO, BLASTED, MAPPED, ANNOTATED]	putative acyltransferase, WS/DGAT/MGAT protein	670	20	0	76.34	10	P:GO:0001666; P:GO:0019432; P:GO:0071731; F:GO:0008374; C:GO:0005886	P:response to hypoxia; P:triglyceride biosynthetic process; P:response to nitric oxide; F:O-acyltransferase activity; C:plasma membrane	EC:2.3; EC:2; EC:2.3.1	Acyltransferases; Transferases; Acyltransferases	IPR009721 (PFAM); IPR045034 (PANTHER)	P:GO:0019432; P:GO:0045017; F:GO:0008374; C:GO:0005886	P:triglyceride biosynthetic process; P:glycerolipid biosynthetic process; F:O-acyltransferase activity; C:plasma membrane	ENOG	Protein of unknown function (DUF1298)	0	Sarcocystidae		0
TGME49_256010	[INTERPRO, BLASTED, MAPPED]	TPA: hypothetical protein BN1205_078150	227	20	2.00071e-138	74.08	1	C:GO:0016020	C:membrane			SSF49599 (SUPERFAMILY)	no GO terms	no GO terms	ENOG		3.2e-124	Sarcocystidae		0
TGME49_256035	[INTERPRO, BLASTED]	hypothetical protein TGME49_256035	120	1	3.98446e-82	100						no IPS match	no IPS match	no IPS match
TGME49_256220	[INTERPRO, BLASTED]	hypothetical protein TGME49_256220	345	14	0	96.89						no IPS match	no IPS match	no IPS match
TGME49_256650	[INTERPRO, BLASTED]	hypothetical protein TGME49_256650	357	20	0	95.47						no IPS match	no IPS match	no IPS match	ENOG		1.4e-65	Sarcocystidae		0
TGME49_256700	[INTERPRO, BLASTED]	putative transmembrane protein	504	20	0	93.02						no IPS match	no IPS match	no IPS match	ENOG		1.2e-115	Sarcocystidae		0
TGME49_256792	[INTERPRO, BLASTED, MAPPED, ANNOTATED]	TPA: intraflagellar transport 52 (Protein NGD5) family protein	257	8	1.10481e-167	95.09	5	P:GO:0042073; P:GO:0060271; C:GO:0005814; C:GO:0030992; C:GO:0031514	P:intraciliary transport; P:cilium assembly; C:centriole; C:intraciliary transport particle B; C:motile cilium			no IPS match	no IPS match	no IPS match	KOG,ENOG	Intraflagellar transport 52 (Protein NGD5 ) family protein	4.5e-143	Sarcocystidae		0
TGME49_256800	[INTERPRO, BLASTED, MAPPED, ANNOTATED]	chaperone dnaJ, related protein	804	16	0	82.6	1	C:GO:0016020	C:membrane			no IPS match	no IPS match	no IPS match	ENOG		0	Sarcocystidae		0
TGME49_256840	[INTERPRO, BLASTED, MAPPED, ANNOTATED]	putative transmembrane protein	764	20	0	95.11	2	P:GO:0046488; C:GO:0016020	P:phosphatidylinositol metabolic process; C:membrane			IPR029058 (G3DSA:3.40.50.GENE3D); IPR029058 (SUPERFAMILY)	no GO terms	no GO terms	ENOG		0	Sarcocystidae		0
TGME49_256850	[INTERPRO, BLASTED]	coiled-coil domain-containing protein 173	531	13	0	90.44						IPR043597 (PFAM); IPR039986 (PANTHER)	no GO terms	no GO terms	ENOG		1.3e-112	Sarcocystidae		0
TGME49_256965	[INTERPRO, BLASTED]	hypothetical protein TGME49_256965	150	3	4.13707e-103	98.89						no IPS match	no IPS match	no IPS match
TGME49_257030	[INTERPRO, BLASTED, MAPPED, ANNOTATED]	putative C4orf27-like protein	510	20	0	74.24	5	P:GO:0006974; F:GO:0042393; F:GO:0072572; C:GO:0005634; C:GO:0005694	P:DNA damage response; F:histone binding; F:poly-ADP-D-ribose binding; C:nucleus; C:chromosome			IPR019361 (PFAM); IPR019361 (PANTHER)	P:GO:0006974; P:GO:0010835; F:GO:0042393; F:GO:0072572; C:GO:0005634	P:DNA damage response; P:regulation of protein ADP-ribosylation; F:histone binding; F:poly-ADP-D-ribose binding; C:nucleus	KOG,ENOG	Uncharacterised conserved protein (DUF2228)	1.1e-268	Sarcocystidae		0
TGME49_257100	[INTERPRO, BLASTED]	putative transcription factor btf3	564	20	0	67.09						no IPS match	no IPS match	no IPS match	ENOG		0	Sarcocystidae		0
TGME49_257160	[INTERPRO, BLASTED, MAPPED, ANNOTATED]	hypothetical protein TGME49_257160	152	11	2.23594e-107	91.66	1	C:GO:0016020	C:membrane			no IPS match	no IPS match	no IPS match	ENOG		5.5e-80	Sarcocystidae		0
TGME49_257170	[INTERPRO, BLASTED, MAPPED]	TPA: hypothetical protein BN1205_077280	874	15	0	91.73	1	C:GO:0016020	C:membrane			no IPS match	no IPS match	no IPS match	ENOG		0	Sarcocystidae		0
TGME49_257310	[INTERPRO, BLASTED, MAPPED]	CS domain protein	355	20	5.63149e-175	73.03	4	P:GO:0006457; F:GO:0019901; F:GO:0051082; C:GO:0005737	P:protein folding; F:protein kinase binding; F:unfolded protein binding; C:cytoplasm			IPR008978 (G3DSA:2.60.40.GENE3D); IPR007052 (PFAM); IPR037898 (PANTHER); IPR007052 (PROSITE_PROFILES); cd06467 (CDD); IPR008978 (SUPERFAMILY)	P:GO:0006457; F:GO:0051082; C:GO:0005737	P:protein folding; F:unfolded protein binding; C:cytoplasm	ENOG	CS domain	2.1e-151	Sarcocystidae		0
TGME49_257330	[INTERPRO, BLASTED]	hypothetical protein TGME49_257330	1083	10	0	94.1						no IPS match	no IPS match	no IPS match	ENOG		0	Sarcocystidae		0
TGME49_257360	[INTERPRO, BLASTED]	hypothetical protein TGME49_257360	1953	17	0	85.91						no IPS match	no IPS match	no IPS match	ENOG		0	Sarcocystidae		0
TGME49_257420	[INTERPRO, BLASTED]	hypothetical protein TGMAS_257420	624	14	0	88.13						no IPS match	no IPS match	no IPS match	ENOG		7.4e-224	Sarcocystidae		0
TGME49_257430	[INTERPRO, BLASTED]	putative proteophosphoglycan 5, related protein	2250	14	0	87.74						PTHR34491 (PANTHER)	no GO terms	no GO terms	ENOG		0	Sarcocystidae		0
TGME49_257460	[INTERPRO, BLASTED, MAPPED, ANNOTATED]	putative transmembrane protein	175	5	5.38887e-125	96.36	1	C:GO:0016020	C:membrane			no IPS match	no IPS match	no IPS match	ENOG		1.4e-90	Sarcocystidae		0
TGME49_257500	[INTERPRO, BLASTED, MAPPED, ANNOTATED]	alpha/beta hydrolase family protein	1235	20	0	77.08	6	P:GO:0006639; F:GO:0047372; C:GO:0016020	P:acylglycerol metabolic process; F:acylglycerol lipase activity; C:membrane	EC:3.1; EC:3.1.1.23; EC:3; EC:3.1.1	Acting on ester bonds; acylglycerol lipase; Hydrolases; Acting on ester bonds	IPR029058 (G3DSA:3.40.50.GENE3D); IPR029058 (G3DSA:3.40.50.GENE3D); IPR022742 (PFAM); IPR029058 (SUPERFAMILY)	no GO terms	no GO terms	ENOG	Serine aminopeptidase, S33	0	Sarcocystidae		0
TGME49_257540	[INTERPRO, BLASTED]	hypothetical protein TGME49_257540	621	11	0	90.02						IPR042530 (G3DSA:1.10.150.GENE3D)	no GO terms	no GO terms	ENOG		0	Sarcocystidae		0
TGME49_257550	[INTERPRO, BLASTED]	hypothetical protein TGME49_257550	1210	15	0	94.24						no IPS match	no IPS match	no IPS match	ENOG		0	Sarcocystidae		0
TGME49_257568	[INTERPRO, BLASTED]	hypothetical protein TGME49_257568	452	8	0	99.25						no IPS match	no IPS match	no IPS match
TGME49_257572	[INTERPRO, BLASTED, MAPPED, ANNOTATED]	putative transmembrane protein	329	6	8.82945e-168	99.37	1	C:GO:0016020	C:membrane			no IPS match	no IPS match	no IPS match	ENOG		1.1e-175	Sarcocystidae		0
TGME49_257580	[INTERPRO, BLASTED]	hypothetical protein TGME49_257580	639	11	0	93.7						no IPS match	no IPS match	no IPS match	ENOG		2.1e-229	Sarcocystidae		0
TGME49_257610	[INTERPRO, BLASTED, MAPPED]	hypothetical protein TGME49_257610	1481	12	0	88.98	1	C:GO:0016020	C:membrane			no IPS match	no IPS match	no IPS match	ENOG		0	Sarcocystidae		0
TGME49_257640	[INTERPRO, BLASTED, MAPPED, ANNOTATED]	pre-RNA processing PIH1/Nop17 protein	830	16	0	90.5	5	P:GO:0000492; P:GO:0006364; C:GO:0005737; C:GO:0097255; C:GO:1990904	P:box C/D snoRNP assembly; P:rRNA processing; C:cytoplasm; C:R2TP complex; C:ribonucleoprotein complex			no IPS match	no IPS match	no IPS match	ENOG		0	Sarcocystidae		0
TGME49_257650	[INTERPRO, BLASTED]	hypothetical protein TGME49_257650	421	14	7.6437e-155	93.62						no IPS match	no IPS match	no IPS match	ENOG		1.3e-142	Sarcocystidae		0
TGME49_257670	[INTERPRO, BLASTED]	TPA: hypothetical protein BN1205_076780	2856	20	0	98.54						no IPS match	no IPS match	no IPS match	ENOG		0	Sarcocystidae		0
TGME49_257690	[INTERPRO, BLASTED, MAPPED, ANNOTATED]	putative transmembrane protein	493	17	0	71.32	1	C:GO:0016020	C:membrane			no IPS match	no IPS match	no IPS match	ENOG		5.6e-243	Sarcocystidae		0
TGME49_257700	[INTERPRO, BLASTED]	TPA: hypothetical protein BN1205_076735	1331	12	0	91.23						no IPS match	no IPS match	no IPS match	ENOG		6.3e-273	Sarcocystidae		0
TGME49_257760	[INTERPRO, BLASTED, MAPPED, ANNOTATED]	putative transmembrane protein	1242	20	0	78.68	1	C:GO:0016020	C:membrane			no IPS match	no IPS match	no IPS match	ENOG		0	Sarcocystidae		0
TGME49_257780	[INTERPRO, BLASTED, MAPPED, ANNOTATED]	putative transmembrane protein	1698	17	0	87.04	1	C:GO:0016020	C:membrane			no IPS match	no IPS match	no IPS match	ENOG		0	Sarcocystidae		0
TGME49_257810	[INTERPRO, BLASTED]	hypothetical protein TGME49_257810	225	18	1.61007e-136	90.28						no IPS match	no IPS match	no IPS match	ENOG		1.7e-61	Sarcocystidae		0
TGME49_257910	[INTERPRO, BLASTED, MAPPED, ANNOTATED]	putative transmembrane protein	978	20	0	96.54	1	C:GO:0016020	C:membrane			no IPS match	no IPS match	no IPS match	ENOG		1.2e-26	Sarcocystidae		0
TGME49_257925	[INTERPRO, BLASTED]	hypothetical protein TGPRC2_257925	1080	20	0	97.33						no IPS match	no IPS match	no IPS match	ENOG		5.7e-248	Sarcocystidae		0
TGME49_257970	[INTERPRO, BLASTED]	hypothetical protein TGME49_257970	363	9	0	95.43						no IPS match	no IPS match	no IPS match	ENOG		3.1e-198	Sarcocystidae		0
TGME49_258000	[INTERPRO, BLASTED, MAPPED, ANNOTATED]	putative transmembrane protein	1271	20	0	92.97	1	C:GO:0016020	C:membrane			no IPS match	no IPS match	no IPS match	ENOG		0	Sarcocystidae		0
TGME49_258040	[INTERPRO, BLASTED, MAPPED, ANNOTATED]	putative transmembrane protein	246	5	5.67807e-124	97.6	1	C:GO:0016020	C:membrane			no IPS match	no IPS match	no IPS match
TGME49_258085	[INTERPRO, BLASTED]	putative transmembrane protein	140	9	3.05727e-81	97.51						no IPS match	no IPS match	no IPS match
TGME49_258090	[INTERPRO, BLASTED]	putative Myosin-2 heavy chain, non muscle	954	20	0	84.26						PTHR23159 (PANTHER)	no GO terms	no GO terms	ENOG		0	Sarcocystidae		0
TGME49_258170	[INTERPRO, BLASTED, MAPPED]	loc397781 related	408	20	0	78.96	3	F:GO:0003677; F:GO:0008270; F:GO:0046872	F:DNA binding; F:zinc ion binding; F:metal ion binding			IPR011993 (G3DSA:2.30.29.GENE3D); SSF50729 (SUPERFAMILY)	no GO terms	no GO terms	ENOG		5e-197	Sarcocystidae		0
TGME49_258200	[INTERPRO, BLASTED]	putative glutamic acid-rich protein	1068	14	0	93.33						no IPS match	no IPS match	no IPS match	ENOG		0	Sarcocystidae		0
TGME49_258220	[INTERPRO, BLASTED]	hypothetical protein TGME49_258220	300	20	0	76.58						no IPS match	no IPS match	no IPS match	ENOG		3.6e-168	Sarcocystidae		0
TGME49_258225	[INTERPRO, BLASTED]	hypothetical protein TGME49_258225	114	3	4.38875e-63	99.12						no IPS match	no IPS match	no IPS match
TGME49_258360	[INTERPRO, BLASTED, MAPPED, ANNOTATED]	hypothetical protein TGME49_258360	538	18	0	78.07	1	C:GO:0016020	C:membrane			no IPS match	no IPS match	no IPS match	ENOG		1.8e-189	Sarcocystidae		0
TGME49_258420	[INTERPRO, BLASTED]	hypothetical protein TGME49_258420	2406	17	0	89.83						no IPS match	no IPS match	no IPS match	ENOG		0	Sarcocystidae		0
TGME49_258490	[INTERPRO, BLASTED, MAPPED, ANNOTATED]	hypothetical protein TGME49_258490	1241	11	0	87.81	1	F:GO:0003676	F:nucleic acid binding			IPR000467 (PROSITE_PROFILES)	F:GO:0003676	F:nucleic acid binding	ENOG		0	Sarcocystidae		0
TGME49_258560	[INTERPRO, BLASTED, MAPPED, ANNOTATED]	putative transmembrane protein	850	20	0	63.35	1	C:GO:0016020	C:membrane			no IPS match	no IPS match	no IPS match	ENOG		0	Sarcocystidae		0
TGME49_258630	[INTERPRO, BLASTED, MAPPED, ANNOTATED]	translation initiation factor if-3	540	20	0	79.34	2	P:GO:0006259; P:GO:0006413	P:DNA metabolic process; P:translational initiation			IPR036788 (G3DSA:3.30.110.GENE3D)	P:GO:0006413	P:translational initiation	ENOG		1e-253	Sarcocystidae		0
TGME49_258670	[INTERPRO, BLASTED, MAPPED, ANNOTATED]	hypothetical protein TGME49_258670	1715	13	0	88.87	2	P:GO:0030041; C:GO:0005884	P:actin filament polymerization; C:actin filament			no IPS match	no IPS match	no IPS match	ENOG		0	Sarcocystidae		0
TGME49_258730	[INTERPRO, BLASTED, MAPPED, ANNOTATED]	putative transmembrane protein	151	5	6.71103e-102	90.01	1	C:GO:0016020	C:membrane			no IPS match	no IPS match	no IPS match	ENOG		1.6e-76	Sarcocystidae		0
TGME49_258820	[INTERPRO, BLASTED, MAPPED, ANNOTATED]	putative transmembrane protein	129	20	8.31498e-91	80.71	1	C:GO:0016020	C:membrane			no IPS match	no IPS match	no IPS match	ENOG		3.4e-67	Sarcocystidae		0
TGME49_258826	[INTERPRO, BLASTED, MAPPED, ANNOTATED]	thioredoxin domain protein	1014	13	0	89.99	32	P:GO:0006886; P:GO:0006896; P:GO:0007041; P:GO:0009860; P:GO:0010668; P:GO:0015833; P:GO:0016239; P:GO:0019953; P:GO:0030029; P:GO:0032456; P:GO:0032989; P:GO:0042147; P:GO:0044703; P:GO:0048611; P:GO:0065008; P:GO:0090156; P:GO:0090326; P:GO:1904810; P:GO:1904811; F:GO:0019905; F:GO:0031267; C:GO:0000138; C:GO:0000139; C:GO:0000938; C:GO:0005797; C:GO:0005829; C:GO:0010008; C:GO:0016020; C:GO:00…	P:intracellular protein transport; P:Golgi to vacuole transport; P:lysosomal transport; P:pollen tube growth; P:ectodermal cell differentiation; P:peptide transport; P:positive regulation of macroautophagy; P:sexual reproduction; P:actin filament-based process; P:endocytic recycling; P:cellular anatomical entity morphogenesis; P:retrograde transport, endosome to Golgi; P:multi-organism reproducti…			IPR013766 (PFAM); G3DSA:3.40.30.10 (GENE3D); PIRSR037293-1 (PIRSR); cd02961 (CDD); IPR036249 (SUPERFAMILY)	no GO terms	no GO terms	KOG	Golgi to vacuole transport	0	Eukaryota		31	C:GO:1990745; P:GO:0006896; C:GO:0000139; C:GO:0043204; C:GO:0000138; P:GO:0009860; P:GO:0065008; P:GO:0044703; P:GO:0090156; P:GO:0042147; C:GO:0010008; C:GO:0005797; C:GO:0048471; P:GO:0032989; P:GO:0030029; P:GO:0016239; P:GO:0010668; P:GO:0032456; P:GO:1904811; P:GO:1904810; F:GO:0031267; P:GO:0006886; C:GO:0032588; P:GO:0019953; P:GO:0048611; P:GO:0007041; P:GO:0015833; P:GO:0090326; C:GO:00…	P:intracellular sphingolipid homeostasis; C:endosome membrane; P:peptide transport; P:ectodermal cell differentiation; C:perinuclear region of cytoplasm; C:Golgi trans cisterna; P:lysosomal transport; P:cellular anatomical entity morphogenesis; P:actin filament-based process; C:cytosol; P:multi-organism reproductive process; P:endocytic recycling; P:retrograde transport, endosome to Golgi; P:embr…	K17275,K20298
TGME49_258840	[INTERPRO, BLASTED, MAPPED, ANNOTATED]	putative transmembrane protein	576	12	0	88.9	1	C:GO:0016020	C:membrane			no IPS match	no IPS match	no IPS match	ENOG		1.8e-200	Sarcocystidae		0
TGME49_258850	[INTERPRO, BLASTED]	u4 tri-snrnp-associated	276	20	2.29841e-121	79.5						PTHR34689 (PANTHER)	no GO terms	no GO terms	ENOG		3.8e-87	Sarcocystidae		0
TGME49_258860	[INTERPRO, BLASTED, MAPPED, ANNOTATED]	putative transmembrane protein	976	14	0	88.62	1	C:GO:0016020	C:membrane			no IPS match	no IPS match	no IPS match	ENOG		0	Sarcocystidae		0
TGME49_258890	[INTERPRO, BLASTED, MAPPED, ANNOTATED]	putative transmembrane protein	187	4	6.4723e-100	90.68	1	C:GO:0016020	C:membrane			no IPS match	no IPS match	no IPS match	ENOG		8.7e-96	Sarcocystidae		0
TGME49_258900	[INTERPRO, BLASTED]	hypothetical protein TGME49_258900	577	11	0	76.75						IPR032675 (G3DSA:3.80.10.GENE3D); IPR036047 (SUPERFAMILY)	F:GO:0005515	F:protein binding	ENOG		8.4e-299	Sarcocystidae		0
TGME49_258910	[INTERPRO, BLASTED, MAPPED, ANNOTATED]	putative transmembrane protein	933	19	0	92.23	1	C:GO:0016020	C:membrane			no IPS match	no IPS match	no IPS match	ENOG	structural constituent of cell wall	0	Sarcocystidae		0
TGME49_258920	[INTERPRO, BLASTED, MAPPED, ANNOTATED]	putative transmembrane protein	404	20	9.93771e-164	85.63	1	C:GO:0016020	C:membrane			no IPS match	no IPS match	no IPS match	ENOG		6.7e-210	Sarcocystidae		0
TGME49_259030	[INTERPRO, BLASTED, MAPPED, ANNOTATED]	putative transmembrane protein	200	12	5.72186e-124	92.35	1	C:GO:0016020	C:membrane			no IPS match	no IPS match	no IPS match	ENOG		1.6e-95	Sarcocystidae		0
TGME49_259040	[INTERPRO, BLASTED, MAPPED, ANNOTATED]	putative transmembrane protein	261	11	2.62932e-163	93.33	1	C:GO:0016020	C:membrane			no IPS match	no IPS match	no IPS match	ENOG		3.1e-99	Sarcocystidae		0
TGME49_259050	[INTERPRO, BLASTED, MAPPED, ANNOTATED]	putative transmembrane protein	286	20	1.94841e-163	78.75	1	C:GO:0016020	C:membrane			no IPS match	no IPS match	no IPS match	ENOG		1.9e-134	Sarcocystidae		0
TGME49_259080	[INTERPRO, BLASTED, MAPPED, ANNOTATED]	galactosyltransferase amine-terminal domain protein	1109	20	0	94.75	14	P:GO:0005975; P:GO:0006688; P:GO:0070085; F:GO:0008378; F:GO:0033207; F:GO:0033842; C:GO:0005794	P:carbohydrate metabolic process; P:glycosphingolipid biosynthetic process; P:glycosylation; F:galactosyltransferase activity; F:beta-1,4-N-acetylgalactosaminyltransferase activity; F:N-acetyl-beta-glucosaminyl-glycoprotein 4-beta-N-acetylgalactosaminyltransferase activity; C:Golgi apparatus	EC:2.4; EC:2; EC:2.4.1.244; EC:2.4.1	Glycosyltransferases; Transferases; N-acetyl-beta-glucosaminyl-glycoprotein 4-beta-N-; Glycosyltransferases	IPR029044 (G3DSA:3.90.550.GENE3D); IPR029044 (G3DSA:3.90.550.GENE3D); IPR027791 (PFAM); IPR029044 (SUPERFAMILY)	no GO terms	no GO terms	ENOG		1.8E-310	Sarcocystidae		0
TGME49_259100	[INTERPRO, BLASTED]	hypothetical protein TGME49_259100	164	3	6.1356e-108	95.85						no IPS match	no IPS match	no IPS match
TGME49_259140	[INTERPRO, BLASTED, MAPPED, ANNOTATED]	2OG-Fe(II) oxygenase family protein	927	20	0	85.45	14	P:GO:0006281; P:GO:0035513; F:GO:0008198; F:GO:0035515; F:GO:0035516; C:GO:0005634; C:GO:0005737	P:DNA repair; P:oxidative RNA demethylation; F:ferrous iron binding; F:oxidative RNA demethylase activity; F:broad specificity oxidative DNA demethylase activity; C:nucleus; C:cytoplasm	EC:1.14.11; EC:1; EC:1.14; EC:1.14.11.33	Acting on paired donors, with incorporation or reduction of molecular oxygen. The oxygen incorporated need not be derived from O2; Oxidoreductases; Acting on paired donors, with incorporation or reduction of molecular oxygen. The oxygen incorporated need not be derived from O2; DNA oxidative demethylase	IPR027450 (PFAM); IPR037151 (G3DSA:2.60.120.GENE3D); PIRSR604574-2 (PIRSR); IPR004574 (PANTHER); SSF51197 (SUPERFAMILY)	P:GO:0035513; P:GO:0035552; F:GO:0008198; F:GO:0035515; F:GO:0035516; C:GO:0005634; C:GO:0005737	P:oxidative RNA demethylation; P:obsolete oxidative single-stranded DNA demethylation; F:ferrous iron binding; F:oxidative RNA demethylase activity; F:broad specificity oxidative DNA demethylase activity; C:nucleus; C:cytoplasm	COG,KOG,ENOG	2OG-Fe(II) oxygenase superfamily	0	Sarcocystidae		0
TGME49_259150	[INTERPRO, BLASTED]	TPA: 2OG-Fe(II) oxygenase family oxidoreductase,putative	1660	12	0	97.58						no IPS match	no IPS match	no IPS match	ENOG		0	Sarcocystidae		0
TGME49_259155	[INTERPRO, BLASTED]	putative 2OG-Fe(II) oxygenase family oxidoreductase	1204	12	0	89.84						no IPS match	no IPS match	no IPS match	ENOG		8.2e-62	Sarcocystidae		0
TGME49_259160	[INTERPRO, BLASTED, MAPPED, ANNOTATED]	nucleolar GTP-binding protein 1	922	18	0	84.26	10	P:GO:0042273; F:GO:0003723; F:GO:0003924; F:GO:0005525; C:GO:0005730	P:ribosomal large subunit biogenesis; F:RNA binding; F:GTPase activity; F:GTP binding; C:nucleolus	EC:3.6.1; EC:3.6; EC:3; EC:3.6.1.15	Acting on acid anhydrides; Acting on acid anhydrides; Hydrolases; nucleoside-triphosphate phosphatase	IPR027417 (G3DSA:3.40.50.GENE3D); PIRSR603373-2 (PIRSR); PIRSR603373-1 (PIRSR); PTHR45759 (PANTHER); IPR027417 (SUPERFAMILY)	P:GO:0042273; F:GO:0003723; F:GO:0003924; C:GO:0005730	P:ribosomal large subunit biogenesis; F:RNA binding; F:GTPase activity; C:nucleolus	ENOG	Nucleolar GTP-binding protein 1 (NOG1)	3.3e-220	Sarcocystidae		0
TGME49_259168	[INTERPRO, BLASTED, MAPPED, ANNOTATED]	hypothetical protein TGME49_259168	1236	15	0	87.68	4	F:GO:0016887; C:GO:0005622	F:ATP hydrolysis activity; C:intracellular anatomical structure	EC:3.6.1; EC:3.6; EC:3; EC:3.6.1.15	Acting on acid anhydrides; Acting on acid anhydrides; Hydrolases; nucleoside-triphosphate phosphatase	IPR027417 (G3DSA:3.40.50.GENE3D); IPR027417 (SUPERFAMILY)	no GO terms	no GO terms	KOG,ENOG	GLE1-like protein	0	Sarcocystidae		0			K18723
TGME49_259190	[INTERPRO, BLASTED, MAPPED]	hypothetical protein TGME49_259190	957	20	0	86.21	1	C:GO:0016020	C:membrane			IPR016084 (G3DSA:1.20.910.GENE3D); IPR016084 (SUPERFAMILY)	no GO terms	no GO terms	ENOG		0	Sarcocystidae		0
TGME49_259205	[INTERPRO, BLASTED]	hypothetical protein TGARI_259205	371	9	0	99.58						no IPS match	no IPS match	no IPS match
TGME49_259280	[INTERPRO, BLASTED, MAPPED]	SAG-related sequence SRS26I	152	17	1.63106e-86	68.98	1	C:GO:0016020	C:membrane			no IPS match	no IPS match	no IPS match	ENOG		2.6e-05	Sarcocystidae		0
TGME49_259580	[INTERPRO, BLASTED, MAPPED, ANNOTATED]	putative cytidine and deoxycytidylate deaminase family, related protein	208	9	4.44803e-128	79.58	5	P:GO:0002100; P:GO:0006367; F:GO:0052717; C:GO:0005672; C:GO:0005737	P:tRNA wobble adenosine to inosine editing; P:transcription initiation at RNA polymerase II promoter; F:tRNA-specific adenosine-34 deaminase activity; C:transcription factor TFIIA complex; C:cytoplasm	EC:3.5.4.33; EC:3.5.4.4	tRNA(adenine(34)) deaminase; adenosine deaminase	IPR009088 (G3DSA:2.30.18.GENE3D); IPR009088 (SUPERFAMILY)	P:GO:0006367; C:GO:0005672	P:transcription initiation at RNA polymerase II promoter; C:transcription factor TFIIA complex	ENOG		5.7e-112	Sarcocystidae		0
TGME49_259600	[INTERPRO, BLASTED]	hypothetical protein TGME49_259600	1004	20	0	86.62						no IPS match	no IPS match	no IPS match	ENOG	vestibular reflex	0	Sarcocystidae		0
TGME49_259610	[INTERPRO, BLASTED, MAPPED]	hypothetical protein TGME49_259610	323	8	0	80.41	1	C:GO:0016020	C:membrane			no IPS match	no IPS match	no IPS match	ENOG		1.4e-154	Sarcocystidae		0
TGME49_259620	[INTERPRO, BLASTED]	secreted ookinete protein, putative (PSOP13)	167	8	3.55081e-59	88.28						no IPS match	no IPS match	no IPS match	ENOG		2.8e-61	Sarcocystidae		0
TGME49_259700	[INTERPRO, BLASTED, MAPPED, ANNOTATED]	putative transmembrane protein	226	7	2.71844e-154	90.88	1	C:GO:0016020	C:membrane			no IPS match	no IPS match	no IPS match	ENOG		3.3e-129	Sarcocystidae		0
TGME49_259840	[INTERPRO, BLASTED, MAPPED, ANNOTATED]	putative transmembrane protein	2083	20	0	90.4	1	C:GO:0016020	C:membrane			no IPS match	no IPS match	no IPS match	ENOG		0	Sarcocystidae		0
TGME49_259870	[INTERPRO, BLASTED, MAPPED, ANNOTATED]	SacI-like domain protein	2225	20	0	84.78	5	P:GO:0036092; P:GO:0046856; F:GO:0043813; C:GO:0016020; C:GO:0043231	P:phosphatidylinositol-3-phosphate biosynthetic process; P:phosphatidylinositol dephosphorylation; F:phosphatidylinositol-3,5-bisphosphate 5-phosphatase activity; C:membrane; C:intracellular membrane-bounded organelle	EC:3.1.3	Acting on ester bonds	IPR002013 (PFAM); IPR043573 (PANTHER); IPR002013 (PROSITE_PROFILES)	P:GO:0046856; F:GO:0016791; F:GO:0043813; C:GO:0043231	P:phosphatidylinositol dephosphorylation; F:phosphatase activity; F:phosphatidylinositol-3,5-bisphosphate 5-phosphatase activity; C:intracellular membrane-bounded organelle	COG,KOG,ENOG	SacI homology domain	0	Sarcocystidae		0
TGME49_259880	[INTERPRO, BLASTED]	TPA: hypothetical protein BN1205_074460	1034	12	0	88.59						no IPS match	no IPS match	no IPS match	ENOG		0	Sarcocystidae		0
TGME49_259895	[INTERPRO, BLASTED, MAPPED, ANNOTATED]	putative transmembrane protein	84	3	3.1376e-52	98.02	1	C:GO:0016020	C:membrane			no IPS match	no IPS match	no IPS match
TGME49_259900	[INTERPRO, BLASTED, MAPPED, ANNOTATED]	putative transmembrane protein	720	14	6.62983e-177	93.83	6	P:GO:0030705; P:GO:0031122; F:GO:0008017; F:GO:0051959; C:GO:0005737; C:GO:0005813	P:cytoskeleton-dependent intracellular transport; P:cytoplasmic microtubule organization; F:microtubule binding; F:dynein light intermediate chain binding; C:cytoplasm; C:centrosome			SSF47162 (SUPERFAMILY)	no GO terms	no GO terms	ENOG		1.7e-70	Sarcocystidae		0
TGME49_259940	[INTERPRO, BLASTED, MAPPED, ANNOTATED]	putative transmembrane protein	623	12	0	88.78	1	C:GO:0016020	C:membrane			no IPS match	no IPS match	no IPS match	ENOG		0	Sarcocystidae		0
TGME49_259970	[INTERPRO, BLASTED]	hypothetical protein TGME49_259970	601	9	0	89.15						no IPS match	no IPS match	no IPS match	ENOG		2.6e-290	Sarcocystidae		0
TGME49_260000	[INTERPRO, BLASTED, MAPPED, ANNOTATED]	hypothetical protein TGME49_260000	2569	17	0	86	9	P:GO:0031032; P:GO:0060287; F:GO:0051015; C:GO:0005576; C:GO:0005737; C:GO:0005813; C:GO:0016460; C:GO:0032982; C:GO:0036064	P:actomyosin structure organization; P:epithelial cilium movement involved in determination of left/right asymmetry; F:actin filament binding; C:extracellular region; C:cytoplasm; C:centrosome; C:myosin II complex; C:myosin filament; C:ciliary basal body			PTHR45615 (PANTHER); IPR006594 (PROSITE_PROFILES)	P:GO:0031032; F:GO:0005515; F:GO:0051015; C:GO:0005737; C:GO:0016460; C:GO:0032982	P:actomyosin structure organization; F:protein binding; F:actin filament binding; C:cytoplasm; C:myosin II complex; C:myosin filament	KOG,ENOG	dynein light intermediate chain binding	0	Sarcocystidae		0
TGME49_260020	[INTERPRO, NO-BLAST]	---NA---	186									no IPS match	no IPS match	no IPS match	ENOG		9.9e-92	Sarcocystidae		0
TGME49_260160	[INTERPRO, BLASTED, MAPPED, ANNOTATED]	NOL1/NOP2/Sun family protein	954	20	0	83.1	8	P:GO:0070475; F:GO:0003723; F:GO:0008173; C:GO:0005730	P:rRNA base methylation; F:RNA binding; F:RNA methyltransferase activity; C:nucleolus	EC:2.1; EC:2; EC:2.1.1; EC:2.1.1.311	Transferring one-carbon groups; Transferases; Transferring one-carbon groups; 25S rRNA (cytosine(2278)-C(5))-methyltransferase	IPR029063 (G3DSA:3.40.50.GENE3D); IPR049560 (PFAM); IPR029063 (G3DSA:3.40.50.GENE3D); IPR023267 (PANTHER); IPR001678 (PROSITE_PROFILES); IPR029063 (SUPERFAMILY); IPR029063 (SUPERFAMILY)	P:GO:0001510; P:GO:0070475; F:GO:0008168; F:GO:0008173; C:GO:0005730	P:RNA methylation; P:rRNA base methylation; F:methyltransferase activity; F:RNA methyltransferase activity; C:nucleolus	COG,KOG,ENOG	Belongs to the class I-like SAM-binding methyltransferase superfamily. RsmB NOP family	0	Sarcocystidae	EC:2.1.1.311	0			K15264
TGME49_260230	[INTERPRO, BLASTED, MAPPED, ANNOTATED]	hypothetical protein TGME49_260230	898	20	0	96.4	7	P:GO:0000963; P:GO:0044528; P:GO:1901259; F:GO:0003723; C:GO:0005759; C:GO:0009507; C:GO:0035770	P:mitochondrial RNA processing; P:regulation of mitochondrial mRNA stability; P:chloroplast rRNA processing; F:RNA binding; C:mitochondrial matrix; C:chloroplast; C:ribonucleoprotein granule			no IPS match	no IPS match	no IPS match	ENOG		0	Sarcocystidae		0
TGME49_260325	[INTERPRO, BLASTED]	hypothetical protein TGME49_260325	237	4	5.19484e-125	99.37						no IPS match	no IPS match	no IPS match
TGME49_260330	[INTERPRO, BLASTED, MAPPED, ANNOTATED]	putative transmembrane protein	156	6	6.06659e-42	98.72	1	C:GO:0016020	C:membrane			no IPS match	no IPS match	no IPS match
TGME49_260375	[INTERPRO, BLASTED]	hypothetical protein TGME49_260375	91	4	2.67521e-60	98.9						no IPS match	no IPS match	no IPS match
TGME49_260380	[INTERPRO, BLASTED]	hypothetical protein TGME49_260380	1108	14	0	91.17						no IPS match	no IPS match	no IPS match	ENOG		0	Sarcocystidae		0
TGME49_260390	[INTERPRO, BLASTED]	hypothetical protein TGME49_260390	1717	20	0	94.74						no IPS match	no IPS match	no IPS match	ENOG		0	Sarcocystidae		0
TGME49_260400	[INTERPRO, BLASTED]	hypothetical protein TGME49_260400	250	8	1.52526e-173	86.55						no IPS match	no IPS match	no IPS match	ENOG		1.7e-139	Sarcocystidae		0
TGME49_260410	[INTERPRO, BLASTED, MAPPED, ANNOTATED]	Mcm10 replication factor	871	20	0	96.38	6	P:GO:0006270; F:GO:0003688; F:GO:0003697; F:GO:0046872; C:GO:0016020; C:GO:0043596	P:DNA replication initiation; F:DNA replication origin binding; F:single-stranded DNA binding; F:metal ion binding; C:membrane; C:nuclear replication fork			IPR012340 (G3DSA:2.40.50.GENE3D); PF22379 (PFAM); IPR015411 (PFAM); IPR040184 (PANTHER)	P:GO:0006270; F:GO:0003688; F:GO:0003690; F:GO:0003697; C:GO:0043596	P:DNA replication initiation; F:DNA replication origin binding; F:double-stranded DNA binding; F:single-stranded DNA binding; C:nuclear replication fork	ENOG	Mcm10 replication factor	0	Sarcocystidae		0
TGME49_260490	[INTERPRO, BLASTED]	hypothetical protein TGME49_260490	1694	9	0	91.15						no IPS match	no IPS match	no IPS match	ENOG		0	Sarcocystidae		0
TGME49_260580	[INTERPRO, BLASTED]	putative proteophosphoglycan 5, related protein	1565	14	0	88.32						no IPS match	no IPS match	no IPS match	ENOG		0	Sarcocystidae		0
TGME49_260620	[INTERPRO, BLASTED, MAPPED, ANNOTATED]	putative transmembrane protein	115	4	2.26452e-36	83.97	1	C:GO:0016020	C:membrane			no IPS match	no IPS match	no IPS match	ENOG		4.8e-36	Sarcocystidae		0
TGME49_260800	[INTERPRO, BLASTED, MAPPED]	hypothetical protein TGARI_260800	1444	18	0	91.83	1	C:GO:0016020	C:membrane			no IPS match	no IPS match	no IPS match	ENOG		0	Sarcocystidae		0
TGME49_260810	[INTERPRO, BLASTED, MAPPED, ANNOTATED]	putative transmembrane protein	277	20	1.57073e-159	82.71	1	C:GO:0016020	C:membrane			no IPS match	no IPS match	no IPS match	ENOG	single fertilization	1.8e-158	Sarcocystidae		0
TGME49_260825	[INTERPRO, BLASTED]	hypothetical protein TGME49_260825	92	4	2.26745e-59	80.55						no IPS match	no IPS match	no IPS match
TGME49_260860	[INTERPRO, BLASTED, MAPPED, ANNOTATED]	putative transmembrane protein	209	10	9.32229e-84	98.66	1	C:GO:0016020	C:membrane			no IPS match	no IPS match	no IPS match
TGME49_260990	[INTERPRO, BLASTED]	hypothetical protein TGME49_260990	181	20	1.15656e-108	69.1						G3DSA:3.30.70.100 (GENE3D); IPR011008 (SUPERFAMILY)	no GO terms	no GO terms	ENOG		3.6e-86	Sarcocystidae		0
TGME49_261040	[INTERPRO, BLASTED]	hypothetical protein TGME49_261040	223	5	2.69564e-152	94.55						no IPS match	no IPS match	no IPS match	ENOG		1.1e-118	Sarcocystidae		0
TGME49_261300	[INTERPRO, BLASTED, MAPPED, ANNOTATED]	putative transmembrane protein	148	8	1.83013e-74	99.22	1	C:GO:0016020	C:membrane			no IPS match	no IPS match	no IPS match
TGME49_261390	[INTERPRO, BLASTED]	hypothetical protein TGME49_261390	248	3	2.94273e-162	100						no IPS match	no IPS match	no IPS match
TGME49_261400	[INTERPRO, BLASTED, MAPPED]	putative transmembrane protein	462	20	0	71.58	1	C:GO:0016020	C:membrane			IPR049856 (CDD)	no GO terms	no GO terms	ENOG		2.1e-252	Sarcocystidae		0
TGME49_261430	[INTERPRO, BLASTED, MAPPED, ANNOTATED]	putative transmembrane protein	1072	12	0	90.16	1	C:GO:0016020	C:membrane			no IPS match	no IPS match	no IPS match	ENOG		0	Sarcocystidae		0
TGME49_261450	[INTERPRO, BLASTED, MAPPED, ANNOTATED]	hypothetical protein TGVEG_261450	1111	20	0	81.68	8	P:GO:0006511; P:GO:0016567; F:GO:0061630; C:GO:0005654	P:ubiquitin-dependent protein catabolic process; P:protein ubiquitination; F:ubiquitin protein ligase activity; C:nucleoplasm	EC:2.3; EC:2; EC:2.3.2	Acyltransferases; Transferases; Acyltransferases	no IPS match	no IPS match	no IPS match	ENOG		3.6e-274	Sarcocystidae		0
TGME49_261475	[INTERPRO, BLASTED]	hypothetical protein TGME49_261475	240	20	6.88466e-136	86.52						no IPS match	no IPS match	no IPS match	ENOG		6e-89	Sarcocystidae		0
TGME49_261490	[INTERPRO, BLASTED, MAPPED, ANNOTATED]	hypothetical protein TGARI_261490	2356	17	0	95.77	1	C:GO:0016020	C:membrane			no IPS match	no IPS match	no IPS match	ENOG		0	Sarcocystidae		0
TGME49_261510	[INTERPRO, BLASTED, MAPPED, ANNOTATED]	ribosomal L22p/L17e protein	573	20	0	87.32	3	P:GO:0006412; F:GO:0003735; C:GO:0005840	P:translation; F:structural constituent of ribosome; C:ribosome			IPR036394 (G3DSA:3.90.470.GENE3D); IPR036394 (SUPERFAMILY)	P:GO:0006412; F:GO:0003735; C:GO:0005840	P:translation; F:structural constituent of ribosome; C:ribosome	ENOG	Belongs to the universal ribosomal protein uL22 family	1.3e-262	Sarcocystidae		0
TGME49_261620	[INTERPRO, BLASTED]	protein FAM133B	254	15	1.77958e-98	65.39						no IPS match	no IPS match	no IPS match	ENOG		2.1e-116	Sarcocystidae		0
TGME49_261680	[INTERPRO, BLASTED, MAPPED, ANNOTATED]	AAA domain protein	1487	20	0	79.06	8	P:GO:0033314; F:GO:0003688; F:GO:0016887; C:GO:0005634	P:mitotic DNA replication checkpoint signaling; F:DNA replication origin binding; F:ATP hydrolysis activity; C:nucleus	EC:3.6.1; EC:3.6; EC:3; EC:3.6.1.15	Acting on acid anhydrides; Acting on acid anhydrides; Hydrolases; nucleoside-triphosphate phosphatase	IPR027417 (G3DSA:3.40.50.GENE3D); G3DSA:1.10.8.60 (GENE3D); IPR049945 (PFAM); IPR027417 (SUPERFAMILY)	F:GO:0016887	F:ATP hydrolysis activity	COG,KOG,ENOG	AAA domain	0	Sarcocystidae		0
TGME49_261690	[INTERPRO, BLASTED, MAPPED, ANNOTATED]	LDL receptor wingless signaling/trafficking chaperone	234	20	1.26009e-171	63.73	1	C:GO:0016020	C:membrane			G3DSA:3.30.70.260 (GENE3D)	no GO terms	no GO terms	ENOG		3.5e-134	Sarcocystidae		0
TGME49_261700	[INTERPRO, BLASTED, MAPPED, ANNOTATED]	putative transmembrane protein	173	6	1.48374e-123	95.11	1	C:GO:0016020	C:membrane			no IPS match	no IPS match	no IPS match	ENOG		2.6e-86	Sarcocystidae		0
TGME49_261730	[INTERPRO, BLASTED]	hypothetical protein TGME49_261730	1924	12	0	91.22						no IPS match	no IPS match	no IPS match	ENOG		0	Sarcocystidae		0
TGME49_261770	[INTERPRO, BLASTED]	hypothetical protein TGME49_261770	150	5	3.1643e-105	99.87						no IPS match	no IPS match	no IPS match
TGME49_261790	[INTERPRO, BLASTED, MAPPED, ANNOTATED]	putative transmembrane protein	1257	13	0	94.15	1	C:GO:0016020	C:membrane			no IPS match	no IPS match	no IPS match	ENOG		0	Sarcocystidae		0
TGME49_261955	[INTERPRO, BLASTED]	hypothetical protein TGME49_261955	1306	20	0	97.11						no IPS match	no IPS match	no IPS match	ENOG		0	Sarcocystidae		0
TGME49_261970	[INTERPRO, BLASTED]	putative transmembrane protein	669	15	0	90.64						no IPS match	no IPS match	no IPS match	ENOG		1.1e-294	Sarcocystidae		0
TGME49_262020	[INTERPRO, BLASTED, MAPPED, ANNOTATED]	putative transmembrane protein	298	8	1.10443e-165	89.65	1	C:GO:0016020	C:membrane			no IPS match	no IPS match	no IPS match
TGME49_262060	[INTERPRO, BLASTED, MAPPED, ANNOTATED]	TPA: protein kinase, putative	941	20	0	98.09	2	F:GO:0016301	F:kinase activity	EC:2.7; EC:2	Transferring phosphorus-containing groups; Transferases	no IPS match	no IPS match	no IPS match	ENOG		0	Sarcocystidae		0
TGME49_262090	[INTERPRO, BLASTED, MAPPED]	hypothetical protein TGME49_262090	310	20	1.09949e-177	76.29	1	C:GO:0016020	C:membrane			no IPS match	no IPS match	no IPS match	ENOG		1.4e-151	Sarcocystidae		0
TGME49_262110	[INTERPRO, BLASTED]	hypothetical protein TGME49_262110	622	13	0	90.8						no IPS match	no IPS match	no IPS match	ENOG		8.5e-297	Sarcocystidae		0
TGME49_262130	[INTERPRO, BLASTED]	hypothetical protein TGME49_262130	772	20	0	99.62						no IPS match	no IPS match	no IPS match	ENOG		4.9e-294	Sarcocystidae		0
TGME49_262170	[INTERPRO, BLASTED]	hypothetical protein TGME49_262170	357	10	0	93.05						no IPS match	no IPS match	no IPS match	ENOG		8.3e-196	Sarcocystidae		0
TGME49_262440	[INTERPRO, BLASTED]	mediator of RNA polymerase II transcription subunit 15-like	1109	10	0	82.49						no IPS match	no IPS match	no IPS match	ENOG		4e-257	Sarcocystidae		0
TGME49_262550	[INTERPRO, BLASTED]	hypothetical protein TGME49_262550	1303	12	0	97.67						no IPS match	no IPS match	no IPS match	ENOG		0	Sarcocystidae		0
TGME49_262560	[INTERPRO, BLASTED]	hypothetical protein TGME49_262560	283	7	1.98454e-112	88.8						no IPS match	no IPS match	no IPS match	ENOG		3.7e-146	Sarcocystidae		0
TGME49_262610	[INTERPRO, BLASTED, MAPPED, ANNOTATED]	putative transmembrane protein	637	20	0	86.59	1	C:GO:0016020	C:membrane			no IPS match	no IPS match	no IPS match	ENOG		0	Sarcocystidae		0
TGME49_262630	[INTERPRO, BLASTED]	TPA: hypothetical protein BN1205_072090	532	11	0	90.66						no IPS match	no IPS match	no IPS match	ENOG		9.1e-231	Sarcocystidae		0
TGME49_262680	[INTERPRO, BLASTED, MAPPED, ANNOTATED]	hypothetical protein TGME49_262680	982	13	0	86.48	4	P:GO:0042147; C:GO:0000139; C:GO:0005829; C:GO:0034066	P:retrograde transport, endosome to Golgi; C:Golgi membrane; C:cytosol; C:Ric1-Rgp1 guanyl-nucleotide exchange factor complex			IPR014848 (PANTHER)	P:GO:0042147; C:GO:0000139; C:GO:0034066	P:retrograde transport, endosome to Golgi; C:Golgi membrane; C:Ric1-Rgp1 guanyl-nucleotide exchange factor complex	ENOG		0	Sarcocystidae		0
TGME49_262715	[INTERPRO, BLASTED]	hypothetical protein TGME49_262715	143	1	1.94333e-97	100						no IPS match	no IPS match	no IPS match
TGME49_262880	[INTERPRO, BLASTED, MAPPED, ANNOTATED]	putative transmembrane protein	2663	20	0	97.49	1	C:GO:0016020	C:membrane			PTHR13491 (PANTHER)	no GO terms	no GO terms	ENOG		0	Sarcocystidae		0
TGME49_262890	[INTERPRO, BLASTED, MAPPED]	DNA topoisomerase 6 subunit B, putative	555	20	0	64.04	1	F:GO:0016853	F:isomerase activity			IPR036890 (G3DSA:3.30.565.GENE3D); IPR036890 (SUPERFAMILY)	no GO terms	no GO terms	ENOG	Histidine kinase-, DNA gyrase B-, and HSP90-like ATPase	1.8e-285	Sarcocystidae		0
TGME49_262900	[INTERPRO, BLASTED, MAPPED]	hypothetical protein TGME49_262900	2193	20	0	78.69	8	P:GO:0071031; P:GO:0071035; P:GO:0071036; P:GO:0071037; P:GO:0071038; P:GO:0071039; F:GO:0003723; C:GO:0031499	P:nuclear mRNA surveillance of mRNA 3'-end processing; P:nuclear polyadenylation-dependent rRNA catabolic process; P:nuclear polyadenylation-dependent snoRNA catabolic process; P:nuclear polyadenylation-dependent snRNA catabolic process; P:TRAMP-dependent tRNA surveillance pathway; P:nuclear polyadenylation-dependent CUT catabolic process; F:RNA binding; C:TRAMP complex			no IPS match	no IPS match	no IPS match	ENOG		0	Sarcocystidae		0
TGME49_262933	[INTERPRO, BLASTED]	hypothetical protein TGME49_262933	666	12	0	89.07						no IPS match	no IPS match	no IPS match
TGME49_262935	[INTERPRO, BLASTED, MAPPED]	hypothetical protein TGME49_262935	681	19	0	93.75	10	P:GO:0000184; P:GO:0006397; P:GO:0006417; P:GO:0008380; P:GO:0051028; F:GO:0003723; F:GO:0003729; C:GO:0005634; C:GO:0005737; C:GO:0035145	P:nuclear-transcribed mRNA catabolic process, nonsense-mediated decay; P:mRNA processing; P:regulation of translation; P:RNA splicing; P:mRNA transport; F:RNA binding; F:mRNA binding; C:nucleus; C:cytoplasm; C:exon-exon junction complex			no IPS match	no IPS match	no IPS match
TGME49_262950	[INTERPRO, BLASTED, MAPPED, ANNOTATED]	putative enterophilin-2L	1024	20	0	85.32	12	P:GO:0000281; P:GO:0031032; F:GO:0004674; F:GO:0005524; C:GO:0005737; C:GO:0015629	P:mitotic cytokinesis; P:actomyosin structure organization; F:protein serine/threonine kinase activity; F:ATP binding; C:cytoplasm; C:actin cytoskeleton	EC:2.7.1; EC:2.7.11.1; EC:2.7; EC:2	Transferring phosphorus-containing groups; non-specific serine/threonine protein kinase; Transferring phosphorus-containing groups; Transferases	no IPS match	no IPS match	no IPS match	ENOG		0	Sarcocystidae		0
TGME49_262980	[INTERPRO, BLASTED, MAPPED, ANNOTATED]	putative transmembrane protein	277	8	3.02408e-149	89.59	1	C:GO:0016020	C:membrane			no IPS match	no IPS match	no IPS match	ENOG		1.3e-119	Sarcocystidae		0
TGME49_262990	[INTERPRO, BLASTED, MAPPED]	hypothetical protein TGME49_262990	1634	16	0	89.58	1	F:GO:0030246	F:carbohydrate binding			no IPS match	no IPS match	no IPS match	ENOG		0	Sarcocystidae		0
TGME49_263100	[INTERPRO, BLASTED, MAPPED, ANNOTATED]	putative transmembrane protein	1086	20	0	95.33	1	C:GO:0016020	C:membrane			no IPS match	no IPS match	no IPS match	ENOG		0	Sarcocystidae		0
TGME49_263110	[INTERPRO, BLASTED, MAPPED, ANNOTATED]	mitochondrial ribosomal protein l27	391	20	8.8917e-178	92.21	4	P:GO:0006412; F:GO:0003735; C:GO:0005762; C:GO:0022625	P:translation; F:structural constituent of ribosome; C:mitochondrial large ribosomal subunit; C:cytosolic large ribosomal subunit			IPR001684 (PFAM); G3DSA:2.40.50.100 (GENE3D); IPR001684 (PANTHER); SSF110324 (SUPERFAMILY)	P:GO:0006412; F:GO:0003735; C:GO:0005762; C:GO:0005840	P:translation; F:structural constituent of ribosome; C:mitochondrial large ribosomal subunit; C:ribosome	ENOG	Ribosomal L27 protein	1.4e-196	Sarcocystidae		0
TGME49_263120	[INTERPRO, BLASTED]	putative transmembrane protein	889	12	0	88.49						no IPS match	no IPS match	no IPS match	ENOG		0	Sarcocystidae		0
TGME49_263135	[INTERPRO, BLASTED]	hypothetical protein TGME49_263135	113	4	5.70245e-78	96.24						no IPS match	no IPS match	no IPS match
TGME49_263200	[INTERPRO, BLASTED]	putative myosin heavy chain	1225	20	0	92.88						no IPS match	no IPS match	no IPS match	ENOG		0	Sarcocystidae		0
TGME49_263280	[INTERPRO, BLASTED, MAPPED, ANNOTATED]	putative transmembrane protein	235	4	4.1404e-138	88.98	1	C:GO:0016020	C:membrane			no IPS match	no IPS match	no IPS match	ENOG		8.6e-125	Sarcocystidae		0
TGME49_263320	[INTERPRO, BLASTED]	hypothetical protein TGME49_263320	403	9	0	88.46						no IPS match	no IPS match	no IPS match	ENOG		9.1e-199	Sarcocystidae		0
[truncated: 1,482 more rows]
