# Supplementary material for: Genome-wide Transcriptomic Analysis of Toxoplasma gondii Reveals Stage-specific Regulatory Programs and Metabolic Adaptations Driving Oocyst Sporulation
Source: bioRxiv preprint, doi:10.1101/2025.09.10.674405, version 1 (2025-09-11)
Supplement: Supplemental Table 5 [file 674405_file24.xlsx]

## Sheet: Content
Differrential expression results for contrasts between life stages of T. gondii
5.1	Bradyzoite_vs_Tachyzoite
5.2	EES1_vs_Bradyzoite
5.3	EES2_vs_EES1
5.4	EES3_vs_EES2
5.5	EES4_vs_EES3
5.6	EES5_vs_EES2
5.7	EES5_vs_EES4
5.8	Sporulated_vs_Sporulating
5.9	Sporulated_vs_Tachyzoite
5.1	Sporulating_vsUnsporulated
5.11	Unsporulated_Vs_EES5

## Sheet: 5.1. Bradyzoite_vs_Tachyzoite
Gene_ID	logFC	AveExpr	t	P.Value	adj.P.Val	B	Product Description	Gene_name	MarkerStage	label	Category
TGME49_275390	13.0153	4.1057	6.82105	1.77907e-05	0.000321883	3.09334	hypothetical protein				sigUp
TGME49_321700	9.88871	2.04576	7.76479	4.87238e-06	0.000131637	4.4213	Kinase-like domain-containing protein [Source:UniProtKB/TrEMBL;Acc:S8F8L7]				sigUp
TGME49_238440	8.72576	8.38399	19.0694	2.17377e-10	3.01952e-07	14.1385	SAG-related sequence SRS22A	SRS22A	Bradyzoite	SRS22A	sigUp
TGME49_321800	8.66508	5.49572	22.5464	3.02262e-11	8.05731e-08	15.8193	EGF family domain-containing protein				sigUp
TGME49_203682	8.63852	3.70304	16.7523	9.86764e-10	5.26077e-07	12.7783	hypothetical protein				sigUp
TGME49_258370	8.30929	4.89491	18.7178	2.70357e-10	3.01952e-07	13.9459	rhoptry kinase family protein ROP28				sigUp
TGME49_219742	8.18563	6.82618	16.2338	1.42147e-09	5.68373e-07	12.4422	hypothetical protein				sigUp
TGME49_257970	7.97438	2.665	14.3012	6.12964e-09	1.44173e-06	11.069	hypothetical protein				sigUp
TGME49_295662	7.91002	9.41366	26.6024	4.246e-12	3.39552e-08	17.367	hypothetical protein				sigUp
TGME49_220560	7.89775	6.42575	17.1046	7.7456e-10	4.4244e-07	12.9997	transmembrane protein TauE, putative				sigUp
TGME49_204395	7.78843	6.76344	10.9493	1.24498e-07	1.0371e-05	8.12983	hypothetical protein				sigUp
TGME49_269310	7.73867	7.76122	14.011	7.75123e-09	1.72185e-06	10.8448	zinc finger (CCCH type) motif-containing protein				sigUp
TGME49_293790	7.65673	4.80036	6.97837	1.42252e-05	0.000282281	3.32303	hypothetical protein				sigUp
TGME49_500151	7.62464	2.64153	19.3661	1.81371e-10	3.01952e-07	14.2974	hypothetical protein, conserved				sigUp
TGME49_278882	7.62142	5.74772	11.8403	5.21252e-08	6.13007e-06	8.99231	GDA1/CD39 (nucleoside phosphatase) family protein				sigUp
TGME49_232400	7.584	10.57	9.36329	6.85215e-07	3.09551e-05	6.4177	PAN domain-containing protein				sigUp
TGME49_231400	7.41643	8.7062	13.0807	1.69549e-08	2.7008e-06	10.0905	tubulin/FtsZ family, GTPase domain-containing protein				sigUp
TGME49_315390	7.3243	5.11339	13.3163	1.38434e-08	2.40664e-06	10.2868	SAG-related sequence SRS53C				sigUp
TGME49_227100	6.98796	8.71907	13.2575	1.45579e-08	2.47702e-06	10.2382	glutaredoxin 5				sigUp
TGME49_266600	6.95387	7.7362	7.87737	4.20515e-06	0.000116766	4.57192	Kazal-type serine protease inhibitor domain-containing protein				sigUp
TGME49_315730	6.81442	8.60137	11.9491	4.70495e-08	5.61574e-06	9.09319	apical membrane antigen AMA3	sporoAMA1	Unsporulated		sigUp
TGME49_313000	6.80681	5.78747	8.26298	2.56723e-06	8.17935e-05	5.07586	Toxoplasma gondii family D protein				sigUp
TGME49_238850	6.7873	8.59627	11.1452	1.02306e-07	9.09045e-06	8.32508	SAG-related sequence SRS22I				sigUp
TGME49_243170	6.71555	7.84298	18.3967	3.3106e-10	3.01952e-07	13.7659	Toxoplasma gondii family A protein				sigUp
TGME49_203688	6.68825	4.69887	12.7311	2.30437e-08	3.12813e-06	9.79224	hypothetical protein				sigUp
TGME49_288520	6.67958	6.9157	5.04802	0.00027913	0.00228944	0.263817	ATPase, AAA family protein				sigUp
TGME49_203685	6.67795	4.46912	13.6611	1.03469e-08	1.96708e-06	10.5676	hypothetical protein				sigUp
TGME49_209180	6.3221	8.75617	17.163	7.44431e-10	4.4244e-07	13.0359	PAN domain-containing protein				sigUp
TGME49_297290	6.2381	3.17367	9.10641	9.22556e-07	3.80287e-05	6.11658	hypothetical protein				sigUp
TGME49_231860	6.22169	3.69172	6.3178	3.71908e-05	0.00054174	2.33542	hypothetical protein				sigUp
TGME49_260190	6.21665	7.48439	8.88992	1.19135e-06	4.53677e-05	5.8572	microneme protein MIC13				sigUp
TGME49_500283	6.13381	7.86388	10.5366	1.90139e-07	1.34561e-05	7.70728	ATP:guanido phosphotransferase, putative				sigUp
TGME49_500292	6.08272	6.77741	8.36031	2.2725e-06	7.54073e-05	5.2002	hypothetical protein, conserved				sigUp
TGME49_255460	6.06817	7.41509	7.74304	5.01389e-06	0.000133654	4.39201	EGF family domain-containing protein				sigUp
TGME49_205210	6.06733	11.0686	18.2511	3.63305e-10	3.01952e-07	13.683	hypothetical protein				sigUp
TGME49_308096	6.03677	1.77387	17.7396	5.06432e-10	3.68176e-07	13.3849	rhoptry kinase family protein (incomplete catalytic triad)				sigUp
TGME49_202050	5.89169	7.13082	10.8208	1.41842e-07	1.10128e-05	7.99989	hypothetical protein				sigUp
TGME49_297280	5.85078	2.94862	15.6737	2.13445e-09	7.42138e-07	12.0644	hypothetical protein				sigUp
TGME49_225590	5.82107	6.96888	16.3943	1.26812e-09	5.51392e-07	12.5476	hypothetical protein				sigUp
TGME49_310260	5.77781	7.76484	11.3284	8.53618e-08	7.84642e-06	8.50477	hypothetical protein				sigUp
TGME49_300130	5.76358	8.72244	9.85937	3.92649e-07	2.21237e-05	6.97959	apical membrane antigen AMA2				sigUp
TGME49_309990	5.75908	9.33151	23.9974	1.44417e-11	5.77451e-08	16.4175	hypothetical protein				sigUp
TGME49_500362	5.71622	5.23416	6.24233	4.16619e-05	0.000589682	2.21868	hypothetical protein, conserved				sigUp
TGME49_320280	5.69598	5.63348	6.00751	5.96097e-05	0.000759075	1.85025	hypothetical protein				sigUp
TGME49_500205	5.68677	4.19846	8.64964	1.59112e-06	5.63017e-05	5.56315	hypothetical protein, conserved				sigUp
TGME49_210095	5.66405	4.75356	4.72456	0.000483468	0.00341244	-0.299063	rhoptry protein ROP43				sigUp
TGME49_316690	5.6206	7.69357	10.297	2.44671e-07	1.57793e-05	7.4548	hypothetical protein				sigUp
TGME49_313050	5.60773	5.67169	11.4557	7.53765e-08	7.26248e-06	8.62801	oxidoreductase, short chain dehydrogenase/reductase family protein				sigUp
TGME49_260530	5.60105	7.84779	14.3111	6.08123e-09	1.44173e-06	11.0766	Sel1 repeat-containing protein				sigUp
TGME49_258810	5.59545	2.34903	7.46638	7.25162e-06	0.000171065	4.01416	SAG-related sequence SRS27B				sigUp
TGME49_500047	5.56887	7.81872	13.9264	8.30686e-09	1.74e-06	10.7785	Dpy-30 motif protein				sigUp
TGME49_224630	5.53534	5.88076	11.5677	6.76291e-08	6.84595e-06	8.7353	zinc finger (CCCH type) motif-containing protein				sigUp
TGME49_238210	5.48606	5.42164	7.9657	3.75006e-06	0.000107835	4.68899	EGF family domain-containing protein				sigUp
TGME49_244335	5.45191	4.23265	12.7742	2.21802e-08	3.12813e-06	9.82944	hypothetical protein				sigUp
TGME49_240390	5.43644	7.39451	12.2921	3.42356e-08	4.48823e-06	9.40541	calcium-dependent protein kinase CDPK4B				sigUp
TGME49_203800	5.41526	6.68703	7.23373	9.96147e-06	0.000217062	3.68867	hypothetical protein				sigUp
TGME49_231090	5.41364	4.61122	4.92133	0.00034555	0.00264944	0.0449322	hypothetical protein				sigUp
TGME49_217940	5.40489	5.14265	11.0068	1.17486e-07	1.00973e-05	8.18753	hypothetical protein				sigUp
TGME49_311300	5.40198	7.63684	6.27712	3.95337e-05	0.000567596	2.2726	cAMP-dependent protein kinase regulatory subunit 2, putative				sigUp
TGME49_320270	5.38226	10.2829	11.671	6.12384e-08	6.566e-06	8.83338	nucleoside transporter, putative				sigUp
TGME49_225400	5.37976	5.89699	6.63272	2.33518e-05	0.00038504	2.81386	hypothetical protein				sigUp
TGME49_313440	5.37272	8.2452	6.43542	3.12079e-05	0.000476278	2.51576	dense granule protein GRA59				sigUp
TGME49_210600	5.368	4.77444	5.60608	0.000111946	0.00115714	1.20222	KRUF family protein				sigUp
TGME49_268860	5.36462	5.60196	9.60133	5.23074e-07	2.62269e-05	6.69049	enolase 1	ENO1	Bradyzoite	ENO1	sigUp
TGME49_205020	5.35391	5.91463	3.16448	0.00808621	0.0269327	-3.14792	hypothetical protein				sigUp
TGME49_500303	5.34457	10.0085	12.1142	4.03356e-08	5.04005e-06	9.24456	PAN domain-containing protein				sigUp
TGME49_278680	5.33296	4.25635	11.9595	4.65917e-08	5.61574e-06	9.10282	hypothetical protein				sigUp
TGME49_202090	5.32117	10.2918	5.96526	6.36307e-05	0.000787701	1.78312	hypothetical protein				sigUp
TGME49_500206	5.31349	7.31457	12.4973	2.84093e-08	3.78648e-06	9.58797	coiled-coil domain-containing protein				sigUp
TGME49_202930	5.30708	6.7426	7.52569	6.69485e-06	0.000162732	4.09601	IMC sutures component ISC5				sigUp
TGME49_320780	5.30504	1.67754	8.32685	2.36952e-06	7.73432e-05	5.15758	hypothetical protein				sigUp
TGME49_304450	5.28694	7.27735	4.04794	0.00159321	0.00818299	-1.51507	cation-transporting ATPase				sigUp
TGME49_275790	5.28151	5.49774	5.11493	0.000249594	0.00212074	0.378565	EGF family domain-containing protein				sigUp
TGME49_269270	5.2636	7.35808	4.9346	0.000337873	0.00262156	0.0679615	leucine rich repeat-containing protein				sigUp
TGME49_202445	5.24931	2.21571	7.18851	1.0604e-05	0.000227346	3.62455	hypothetical protein				sigUp
TGME49_257810	5.24788	2.6779	7.16743	1.09183e-05	0.00023294	3.59458	hypothetical protein				sigUp
TGME49_275590	5.24335	8.59528	14.9014	3.82301e-09	1.05423e-06	11.5171	mono- or diacylglycerol acyltransferase				sigUp
TGME49_206440	5.23936	4.97278	4.70094	0.000503535	0.00352369	-0.340682	cpw-wpc domain-containing protein				sigUp
TGME49_285820	5.21836	2.09303	5.93481	6.67047e-05	0.000810695	1.7346	hypothetical protein				sigUp
TGME49_243240	5.21472	8.43499	4.92682	0.000342352	0.00263502	0.0544615	WD domain, G-beta repeat-containing protein				sigUp
TGME49_500117	5.17771	6.41209	6.14916	4.79817e-05	0.000645976	2.07343	hypothetical protein, conserved				sigUp
TGME49_248425	5.17456	7.314	8.63729	1.61523e-06	5.64059e-05	5.54785	hypothetical protein				sigUp
TGME49_500031	5.16193	8.0966	11.9936	4.513e-08	5.55238e-06	9.13417	hypothetical protein, conserved				sigUp
TGME49_287040	5.15539	11.1361	4.78776	0.000433782	0.00313365	-0.188046	hypothetical protein				sigUp
TGME49_259020	5.1072	5.33614	6.2084	4.38546e-05	0.000608927	2.16593	bradyzoite antigen BAG1	BAG1	Bradyzoite	BAG1	sigUp
TGME49_292390	5.09022	2.95845	4.35543	0.000920289	0.00545556	-0.956689	KRUF family protein				sigUp
TGME49_213415	5.06959	4.55923	3.19544	0.00763318	0.0258655	-3.09066	hypothetical protein				sigUp
TGME49_283500	5.06442	6.34275	3.54523	0.00398891	0.0159736	-2.44211	tetratricopeptide repeat-containing protein				sigUp
TGME49_202020	5.06148	5.77343	14.5278	5.11854e-09	1.27915e-06	11.2406	DnAK-TPR				sigUp
TGME49_500417	5.05774	6.9393	5.52783	0.000126912	0.00126548	1.07323	hypothetical protein, conserved				sigUp
TGME49_301460	5.05027	11.1824	5.76443	8.7072e-05	0.000983	1.46057	hypothetical protein				sigUp
TGME49_270020	5.04411	2.67537	3.59689	0.00362641	0.0148873	-2.34635	hypothetical protein				sigUp
TGME49_204500	5.03447	8.14493	10.2225	2.64881e-07	1.64522e-05	7.37521	hypothetical protein				sigUp
TGME49_233920	5.03128	4.85194	10.5039	1.96753e-07	1.37486e-05	7.67308	zinc finger, C3HC4 type (RING finger) domain-containing protein				sigUp
TGME49_217951	5.02705	1.95776	2.8907	0.0134699	0.0398959	-3.65166	hypothetical protein				sigUp
TGME49_500227	5.01894	7.29282	9.47853	6.00854e-07	2.87726e-05	6.55051	dynein heavy chain, putative				sigUp
TGME49_318750	5.00563	8.88936	17.5967	5.56561e-10	3.70902e-07	13.2997	deoxyribose-phosphate aldolase				sigUp
TGME49_318650	5.00509	7.59783	8.04044	3.4061e-06	0.000101259	4.78727	transhydrogenase				sigUp
TGME49_215385	4.9956	6.95223	3.16899	0.00801866	0.0267868	-3.13959	transporter, major facilitator family protein				sigUp
TGME49_311370	4.99439	10.8647	13.8695	8.70467e-09	1.74028e-06	10.7336	methylmalonate-semialdehyde dehydrogenase [acylating], putative				sigUp
TGME49_254330	4.98867	7.50508	8.95607	1.10126e-06	4.29599e-05	5.93701	lipase				sigUp
TGME49_314250	4.97085	10.4392	10.7384	1.54313e-07	1.16432e-05	7.91583	bradyzoite rhoptry protein BRP1				sigUp
TGME49_500044	4.96203	9.64581	10.8473	1.38066e-07	1.09938e-05	8.02679	3'5'-cyclic nucleotide phosphodiesterase PDE16				sigUp
TGME49_240790	4.9537	5.63728	5.57542	0.000117575	0.00119624	1.15178	dynein light chain, putative				sigUp
TGME49_237195	4.92723	6.71909	5.93898	6.62752e-05	0.000808987	1.74124	hypothetical protein				sigUp
TGME49_500091	4.92456	6.56669	6.62415	2.36454e-05	0.000389078	2.80102	leucine-rich repeat containing protein				sigUp
TGME49_306455	4.92034	8.37043	7.57005	6.3083e-06	0.000156669	4.15692	hypothetical protein				sigUp
TGME49_253660	4.91998	5.7936	4.33977	0.000946122	0.0055513	-0.984912	RING finger protein, putative				sigUp
TGME49_237585	4.90296	7.59104	10.4109	2.16903e-07	1.4521e-05	7.5755	hypothetical protein				sigUp
TGME49_249960	4.88375	5.47424	6.93754	1.50709e-05	0.000292067	3.26374	inner dynein arm light chain, putative				sigUp
TGME49_315520	4.86881	7.46903	13.9005	8.48568e-09	1.74e-06	10.7581	calcium-binding egf domain-containing protein CBDP1				sigUp
TGME49_204560	4.84108	8.38839	8.97243	1.08013e-06	4.2342e-05	5.95668	type I fatty acid synthase, putative				sigUp
TGME49_224760	4.8286	8.01267	11.6469	6.2666e-08	6.59394e-06	8.81062	SAG-related sequence SRS40E				sigUp
TGME49_318180	4.82768	7.91096	10.1493	2.86482e-07	1.7356e-05	7.29653	peroxisomal membrane protein PEX16, putative				sigUp
TGME49_239550	4.82745	6.60512	11.4106	7.876e-08	7.49814e-06	8.58453	dynein light chain 2B, cytoplasmic, putative				sigUp
TGME49_229915	4.82716	6.69755	9.94146	3.58856e-07	2.09473e-05	7.07016	dynein regulatory complex protein 9, putative				sigUp
TGME49_200250	4.81101	13.0666	5.58338	0.000116087	0.00118411	1.16488	microneme protein MIC17A				sigUp
TGME49_205520	4.80918	10.9704	6.53255	2.70383e-05	0.000426682	2.6632	apicomplexan amino acid transporter ApiAT5-2				sigUp
TGME49_500291	4.77667	8.05051	9.18238	8.44317e-07	3.61029e-05	6.20637	WD repeat-containing protein 19, putative				sigUp
TGME49_258670	4.75068	9.92519	8.72446	1.4531e-06	5.25051e-05	5.65542	hypothetical protein				sigUp
TGME49_252260	4.7485	6.43283	4.38671	0.000870852	0.00526293	-0.900383	hypothetical protein				sigUp
TGME49_320230	4.73839	7.80476	7.26263	9.57282e-06	0.000211676	3.72949	SAG-related sequence SRS15C				sigUp
TGME49_500212	4.72896	6.43615	8.60082	1.6887e-06	5.85863e-05	5.50259	hypothetical protein, conserved				sigUp
TGME49_253180	4.71961	3.99385	3.16017	0.00815137	0.0270596	-3.15588	hypothetical protein				sigUp
TGME49_262940	4.71	6.10655	7.84903	4.36335e-06	0.000120739	4.53416	aspartyl protease ASP2				sigUp
TGME49_252640	4.70183	4.87724	11.5727	6.73003e-08	6.84595e-06	8.74012	P-type ATPase PMA1	PMA1	Bradyzoite	PMA1	sigUp
TGME49_500181	4.69863	8.00766	4.89342	0.000362292	0.00273842	-0.00355994	calpain family cysteine protease, putative				sigUp
TGME49_223430	4.6934	4.10809	3.93957	0.00193796	0.00946036	-1.71372	hypothetical protein				sigUp
TGME49_207210	4.66639	6.36389	6.10103	5.16371e-05	0.000688237	1.99792	hypothetical protein				sigUp
TGME49_291040	4.6661	5.56765	6.66679	2.22227e-05	0.000372569	2.86479	lactate dehydrogenase LDH2	LDH2	Bradyzoite	LDH2	sigUp
TGME49_296340	4.66544	5.97373	5.07086	0.000268655	0.00221706	0.303057	hypothetical protein				sigUp
TGME49_291860	4.66395	7.90463	10.2437	2.5895e-07	1.63057e-05	7.39793	HORMA domain-containing protein				sigUp
TGME49_245440	4.66114	9.36192	4.61931	0.000579837	0.00389006	-0.485004	hypothetical protein				sigUp
TGME49_209985	4.65956	11.1407	4.43304	0.000802645	0.00497964	-0.817172	rhoptry protein ROP42				sigUp
TGME49_254790	4.65221	5.75406	5.40216	0.000155526	0.00148773	0.864291	hypothetical protein				sigUp
TGME49_220650	4.6345	4.30704	4.81923	0.000411067	0.00301311	-0.132964	hypothetical protein				sigUp
TGME49_233960	4.63376	6.68964	6.17909	4.58473e-05	0.000626471	2.12023	hypothetical protein				sigUp
TGME49_500144	4.62981	6.6279	13.162	1.5804e-08	2.57927e-06	10.1587	hypothetical protein, conserved				sigUp
TGME49_202600	4.6294	2.69515	3.39896	0.00522885	0.0195872	-2.71344	hypothetical protein				sigUp
TGME49_500021	4.6294	6.48704	4.34742	0.000933405	0.00551696	-0.971117	hypothetical protein, conserved				sigUp
TGME49_321470	4.62381	7.0015	8.85545	1.2414e-06	4.68276e-05	5.81541	SAG-related sequence SRS12D				sigUp
TGME49_254020	4.62008	8.14975	9.55678	5.49968e-07	2.69822e-05	6.63988	dynein intermediate chain, putative				sigUp
TGME49_211360	4.61807	8.49578	6.14938	4.79657e-05	0.000645976	2.07377	hypothetical protein				sigUp
TGME49_221840	4.60235	4.94021	9.35847	6.89009e-07	3.09551e-05	6.41212	hypothetical protein				sigUp
TGME49_265030	4.58937	8.89281	8.59907	1.69232e-06	5.85863e-05	5.50042	hypothetical protein				sigUp
TGME49_300980	4.58574	4.19784	6.06045	5.49486e-05	0.000719188	1.93399	hypothetical protein				sigUp
TGME49_226450	4.58543	8.29693	6.10959	5.0966e-05	0.000680426	2.01137	hypothetical protein				sigUp
TGME49_273110	4.57767	6.25953	6.05163	5.56976e-05	0.00072425	1.92007	SAG-related sequence SRS30D				sigUp
TGME49_220585	4.56917	5.16409	3.81716	0.00242125	0.0111088	-1.93903	hypothetical protein				sigUp
TGME49_321685	4.55646	1.70316	4.55637	0.000646854	0.00425053	-0.596805	hypothetical protein				sigUp
TGME49_275710	4.55021	7.86326	12.1934	3.74866e-08	4.75842e-06	9.31646	hypothetical protein				sigUp
TGME49_299150	4.54852	9.33341	3.21792	0.00732027	0.0251461	-3.04905	AP2 domain transcription factor AP2III-3				sigUp
TGME49_320500	4.54733	8.92461	7.60316	6.03539e-06	0.00015371	4.20221	patched family protein				sigUp
TGME49_262890	4.54392	9.00409	13.5166	1.16797e-08	2.12278e-06	10.4509	hypothetical protein				sigUp
TGME49_252395	4.53825	8.21072	3.88409	0.00214336	0.0101983	-1.81573	hypothetical protein				sigUp
TGME49_232420	4.52954	8.5713	9.81633	4.11718e-07	2.2712e-05	6.93184	hypothetical protein				sigUp
TGME49_239430	4.51259	6.53012	4.21044	0.00119051	0.00659769	-1.21892	EF hand domain-containing protein				sigUp
TGME49_306270	4.50886	9.0949	10.9967	1.18688e-07	1.00973e-05	8.1774	hypothetical protein				sigUp
TGME49_305830	4.50655	5.015	6.8257	1.76726e-05	0.000321422	3.10018	EF hand domain-containing protein				sigUp
TGME49_300990	4.50522	8.61954	8.11315	3.10365e-06	9.43723e-05	4.88223	Toxoplasma gondii family C protein				sigUp
TGME49_316290	4.47947	6.74924	7.28646	9.26448e-06	0.000208113	3.76306	hypothetical protein				sigUp
TGME49_315340	4.47657	7.96552	15.1156	3.24362e-09	9.264e-07	11.6721	SAG-related sequence SRS52C				sigUp
TGME49_206570	4.47513	9.23174	5.8902	7.14969e-05	0.000857212	1.66324	kinesin, putative				sigUp
TGME49_320715	4.474	11.0584	5.8372	7.76672e-05	0.000906957	1.57811	hypothetical protein				sigUp
TGME49_286040	4.47375	3.80247	5.4954	0.000133719	0.0013251	1.01953	hypothetical protein				sigUp
TGME49_202910	4.47013	5.59889	15.1863	3.07365e-09	9.1037e-07	11.7227	zinc carboxypeptidase superfamily protein				sigUp
TGME49_271320	4.46069	7.23871	5.26708	0.000193996	0.00174903	0.637258	hypothetical protein				sigUp
TGME49_262160	4.45174	5.45119	6.57662	2.53454e-05	0.00041113	2.72966	ubiquitin-like protein, putative				sigUp
TGME49_269160	4.45136	4.95903	9.62923	5.06953e-07	2.58931e-05	6.72207	outer dynein arm docking complex protein ODA1, putative				sigUp
TGME49_267790	4.45098	7.24273	4.50622	0.000706025	0.00449887	-0.686226	hypothetical protein				sigUp
TGME49_201785	4.443	3.00125	7.54576	6.51699e-06	0.000160853	4.12359	hypothetical protein				sigUp
TGME49_315962	4.42213	5.77134	13.3874	1.30295e-08	2.3155e-06	10.3454	hypothetical protein				sigUp
TGME49_235580	4.41368	4.81801	5.97485	6.26933e-05	0.000784598	1.79838	hypothetical protein				sigUp
TGME49_316320	4.41227	9.43787	10.6018	1.77679e-07	1.29172e-05	7.77504	ABC transporter transmembrane region domain-containing protein				sigUp
TGME49_264150	4.40765	6.0245	5.03795	0.000283883	0.00230858	0.246496	hypothetical protein				sigUp
TGME49_248677	4.40566	8.46939	9.38415	6.69052e-07	3.05738e-05	6.44184	nucleic acid binding protein, putative				sigUp
TGME49_285160	4.39274	7.99162	9.03501	1.00321e-06	4.04827e-05	6.03161	cyclin-dependent kinase family 5 protein				sigUp
TGME49_272265	4.38989	4.93586	4.83072	0.000403082	0.00296273	-0.112871	hypothetical protein				sigUp
TGME49_242750	4.37329	7.14701	5.54054	0.000124344	0.00124956	1.09424	hypothetical protein				sigUp
TGME49_269315	4.36931	8.52417	7.4382	7.53327e-06	0.000175637	3.97512	hypothetical protein				sigUp
TGME49_213635	4.36447	4.88598	5.33465	0.000173636	0.00160528	0.751136	hypothetical protein				sigUp
TGME49_315400	4.35106	6.2843	15.8447	1.88263e-09	6.84336e-07	12.1814	SAG-related sequence SRS53D				sigUp
TGME49_227090	4.35027	8.98304	9.5415	5.59527e-07	2.72838e-05	6.62248	aspartokinase				sigUp
TGME49_500169	4.34457	6.17316	7.14748	1.1225e-05	0.000234991	3.56616	CFAP99 domain-containing protein				sigUp
TGME49_265100	4.33977	5.20331	4.80927	0.000418117	0.00305644	-0.150381	hypothetical protein				sigUp
TGME49_320260	4.33355	8.25434	8.05814	3.32966e-06	9.97278e-05	4.81046	hypothetical protein				sigUp
TGME49_224040	4.32948	4.83287	3.37957	0.00542028	0.0201609	-2.7494	flagellar associated protein				sigUp
TGME49_254680	4.32926	4.66414	4.75184	0.00046133	0.00329398	-0.251086	hypothetical protein				sigUp
TGME49_230200	4.32926	5.35566	5.74782	8.9382e-05	0.000991969	1.43365	hypothetical protein				sigUp
TGME49_204045	4.32712	2.65589	9.85334	3.95262e-07	2.21237e-05	6.97291	hypothetical protein				sigUp
TGME49_278400	4.32516	3.47694	5.72507	9.26531e-05	0.00101641	1.39669	Toxoplasma gondii family A protein				sigUp
TGME49_257010	4.32388	6.38791	6.38244	3.37659e-05	0.000505666	2.43476	toxolysin TLN3				sigUp
TGME49_239365	4.2918	10.9949	7.52119	6.73546e-06	0.000162964	4.08981	hypothetical protein				sigUp
TGME49_311710	4.26961	4.69464	5.24513	0.000201137	0.00179255	0.600139	hypothetical protein				sigUp
TGME49_246110	4.26961	4.16676	3.92224	0.00199983	0.00965157	-1.74555	haloacid dehalogenase-like hydrolase, putative				sigUp
TGME49_210320	4.26818	4.25327	7.70148	5.29659e-06	0.000139332	4.33588	SAG-related sequence SRS37A				sigUp
TGME49_213700	4.26809	5.55963	3.80416	0.00247941	0.0112851	-1.96302	coiled-coil domain-containing protein				sigUp
TGME49_203250	4.26174	6.91326	7.72788	5.11509e-06	0.000135001	4.37156	hypothetical protein				sigUp
TGME49_221550	4.26101	11.1145	9.67715	4.805e-07	2.51148e-05	6.77613	CMGC kinase, MAPK family, MEK kinase-related (incomplete catalytic triad)				sigUp
TGME49_275355	4.25401	4.50728	4.511	0.000700144	0.00446852	-0.677683	SAG-related sequence SRS47A				sigUp
TGME49_500394	4.25371	8.96588	5.16282	0.000230481	0.00199069	0.460329	CAP domain-containing protein				sigUp
TGME49_276860	4.2518	6.52495	9.17123	8.55344e-07	3.61914e-05	6.19323	LEA domain-containing protein LEA860				sigUp
TGME49_265050	4.23629	8.36363	7.8056	4.61829e-06	0.000126916	4.47608	zinc finger protein, putative				sigUp
TGME49_221420	4.2341	6.20443	7.8834	4.17224e-06	0.000116256	4.57995	Chromosome-associated kinesin KLP1, putative				sigUp
TGME49_227370	4.22938	11.0561	8.32802	2.36605e-06	7.73432e-05	5.15908	hydrolase CocE/NonD family protein				sigUp
TGME49_273530	4.22024	5.19567	3.43775	0.00486604	0.018548	-2.64146	flagellar associated protein				sigUp
TGME49_208760	4.20878	4.81949	3.04818	0.0100434	0.0317334	-3.36259	hypothetical protein				sigUp
TGME49_287430	4.20213	6.46619	4.36253	0.000908818	0.00540761	-0.943901	hypothetical protein				sigUp
TGME49_225028	4.1875	7.25177	16.0646	1.60499e-09	6.11195e-07	12.3297	myosin heavy chain, putative				sigUp
TGME49_241130	4.17488	6.6451	8.24752	2.61766e-06	8.2741e-05	5.05602	CKK domain-containing protein				sigUp
TGME49_293780	4.1591	6.04081	6.74746	1.97747e-05	0.000346794	2.98472	hypothetical protein				sigUp
TGME49_264170	4.15778	11.9217	8.16032	2.92286e-06	8.99004e-05	4.9435	hypothetical protein				sigUp
TGME49_301140	4.15334	5.11282	4.95518	0.000326322	0.00256346	0.103621	SAG-related sequence SRS19A				sigUp
TGME49_210330	4.14177	5.71414	3.24503	0.00696003	0.0242948	-2.99884	SAG-related sequence SRS37B				sigUp
TGME49_306500	4.13617	7.79128	16.5183	1.16194e-09	5.48236e-07	12.6282	hypothetical protein				sigUp
TGME49_500068	4.13503	6.25957	13.7373	9.71066e-09	1.89405e-06	10.6286	hypothetical protein, conserved				sigUp
TGME49_320190	4.12921	7.08448	11.6652	6.15794e-08	6.566e-06	8.82789	SAG-related sequence SRS16B				sigUp
TGME49_209920	4.12806	4.15609	5.31249	0.000180054	0.00165125	0.713857	PAN domain-containing protein				sigUp
TGME49_294240	4.11884	8.1537	9.17789	8.48735e-07	3.61029e-05	6.20109	hypothetical protein				sigUp
TGME49_244180	4.11766	6.86557	10.9578	1.23438e-07	1.0371e-05	8.13834	microneme-like protein				sigUp
TGME49_213850	4.11436	9.99802	9.70117	4.67801e-07	2.46772e-05	6.80314	MORN repeat-containing protein				sigUp
TGME49_204420	4.11169	7.61842	4.42516	0.000813848	0.005018	-0.831317	oocyst wall protein OWP1				sigUp
TGME49_292935	4.10497	6.91812	4.18009	0.0012568	0.00686048	-1.27406	coiled-coil domain-containing protein				sigUp
TGME49_269300	4.09899	6.9997	12.7834	2.19998e-08	3.12813e-06	9.8374	lipase				sigUp
TGME49_213480	4.09801	10.825	7.79112	4.7068e-06	0.000128905	4.45666	hypothetical protein				sigUp
TGME49_276840	4.09322	6.17168	13.0042	1.81219e-08	2.78695e-06	10.0259	hypothetical protein				sigUp
TGME49_255620	4.08636	6.20259	9.04758	9.88482e-07	4.01263e-05	6.04661	B9-C2 domain-containing protein				sigUp
TGME49_287460	4.07641	4.92041	3.8193	0.00241182	0.0110847	-1.93509	hypothetical protein				sigUp
TGME49_247750	4.07274	4.7198	5.47791	0.00013755	0.00135801	0.990502	hypothetical protein				sigUp
TGME49_309230	4.05154	3.37551	5.18478	0.000222239	0.00194022	0.497711	hypothetical protein				sigUp
TGME49_500383	4.0482	8.14361	16.514	1.16544e-09	5.48236e-07	12.6254	cilia- and flagella-associated protein 61, putative				sigUp
TGME49_252330	4.04253	3.57663	3.7196	0.00289422	0.0125419	-2.1192	hypothetical protein				sigUp
TGME49_233280	4.04242	9.46949	7.09939	1.20028e-05	0.00024867	3.49741	hypothetical protein				sigUp
TGME49_500038	4.03304	6.46761	15.393	2.62981e-09	8.76274e-07	11.8692	hypothetical protein, conserved				sigUp
TGME49_240800	4.02762	6.4846	5.5544	0.000121606	0.00122633	1.11713	MORN repeat-containing protein				sigUp
TGME49_313840	4.02244	2.7299	4.92318	0.000344469	0.00264369	0.0481425	hypothetical protein				sigUp
TGME49_500045	4.01104	9.63827	7.31738	8.88004e-06	0.000202318	3.80652	endo-1,3(4)-beta-glucanase, putative				sigUp
TGME49_278080	4.00509	6.41213	10.6417	1.70483e-07	1.26236e-05	7.81634	Toxoplasma gondii family A protein				sigUp
TGME49_225540	3.99245	9.58784	10.6576	1.67711e-07	1.25345e-05	7.83271	hypothetical protein				sigUp
TGME49_295945	3.98688	3.50081	8.22928	2.67858e-06	8.33486e-05	5.03255	hypothetical protein				sigUp
TGME49_205090	3.98507	6.23625	6.63868	2.31499e-05	0.000384292	2.82279	Toxoplasma gondii family D protein				sigUp
TGME49_319630	3.97066	7.99689	13.6348	1.0577e-08	1.96708e-06	10.5464	hypothetical protein				sigUp
TGME49_237810	3.96888	8.15289	3.85308	0.0022678	0.0105994	-1.87283	hypothetical protein				sigUp
TGME49_267470	3.95834	12.5759	9.88871	3.80193e-07	2.20319e-05	7.01204	cold-shock DNA-binding domain-containing protein				sigUp
TGME49_205480	3.95635	6.65039	4.20656	0.00119878	0.00662516	-1.22597	IMC subcompartment protein ISP4				sigUp
TGME49_294595	3.9528	6.24012	4.14313	0.00134275	0.00721152	-1.34132	EB1 domain-containing protein				sigUp
TGME49_306620	3.95035	8.45106	10.429	2.12806e-07	1.4521e-05	7.59459	AP2 domain transcription factor AP2IX-9				sigUp
TGME49_294850	3.94004	7.27247	10.256	2.55572e-07	1.62207e-05	7.4111	actin-like protein ALP7				sigUp
TGME49_231125	3.93975	5.70208	4.85272	0.000388246	0.00288819	-0.0744549	hypothetical protein				sigUp
TGME49_271335	3.92995	7.89528	18.1911	3.77581e-10	3.01952e-07	13.6486	hypothetical protein				sigUp
TGME49_240470	3.92796	6.33005	6.5421	2.66618e-05	0.000425578	2.67762	hypothetical protein				sigUp
TGME49_265290	3.90789	4.10915	3.21273	0.00739125	0.0253137	-3.05864	hypothetical protein				sigUp
TGME49_236400	3.90772	8.08759	10.4862	2.00429e-07	1.38175e-05	7.65456	hypothetical protein				sigUp
TGME49_253330	3.90558	5.92333	5.65471	0.000103594	0.00109755	1.28193	bradyzoite pseudokinase BPK1	BPK1	Bradyzoite	BPK1	sigUp
TGME49_212275	3.90525	5.66727	10.1594	2.83402e-07	1.73005e-05	7.30738	hypothetical protein				sigUp
TGME49_276960	3.90325	8.75447	9.61796	5.134e-07	2.59852e-05	6.70932	tetratricopeptide repeat-containing protein				sigUp
TGME49_229405	3.89973	8.41571	9.63992	5.00922e-07	2.58931e-05	6.73415	3'5'-cyclic nucleotide phosphodiesterase PDE4				sigUp
TGME49_500197	3.89629	5.70017	10.6246	1.73532e-07	1.27316e-05	7.79863	intraflagellar transport protein 20, putative				sigUp
TGME49_200270	3.89287	11.7588	6.13044	4.93693e-05	0.000661317	2.04411	PAN/Apple domain-containing protein				sigUp
TGME49_305580	3.88431	6.78505	3.94588	0.00191593	0.00938256	-1.70214	ankyrin repeat-containing protein				sigUp
TGME49_293620	3.87867	4.22055	5.76655	8.67815e-05	0.000983	1.46401	hypothetical protein				sigUp
TGME49_320200	3.87688	7.56571	12.7636	2.23898e-08	3.12813e-06	9.82029	SAG-related sequence SRS16A				sigUp
TGME49_500393	3.8691	7.28358	5.6881	9.82404e-05	0.00106023	1.33648	hypothetical protein, conserved				sigUp
TGME49_315480	3.86085	9.86627	7.48509	7.07087e-06	0.000167943	4.04003	acyl-CoA dehydrogenase, middle domain-containing protein				sigUp
TGME49_253580	3.83162	9.23412	3.81451	0.00243302	0.0111437	-1.94393	CMGC kinase, CDK family				sigUp
TGME49_244620	3.83015	9.11689	8.80337	1.32132e-06	4.89463e-05	5.75204	NEK kinase				sigUp
TGME49_279460	3.81999	5.25131	6.82511	1.76876e-05	0.000321422	3.09931	Toxoplasma gondii family B protein				sigUp
TGME49_312600	3.81794	9.80657	9.22745	8.01286e-07	3.48254e-05	6.25935	heat shock protein HSP21				sigUp
TGME49_272200	3.81177	10.1448	9.5189	5.74e-07	2.78198e-05	6.59669	AGC kinase				sigUp
TGME49_500421	3.80541	9.59151	10.2036	2.70271e-07	1.66258e-05	7.355	hypothetical protein, conserved				sigUp
TGME49_233940	3.80207	6.04245	3.88554	0.00213771	0.0101818	-1.81305	centrosomal protein CEP72, putative				sigUp
TGME49_500315	3.80207	6.41993	3.96258	0.00185883	0.00917818	-1.67147	hypothetical protein, conserved				sigUp
TGME49_249725	3.80102	3.94777	5.38202	0.00016071	0.00152636	0.830606	hypothetical protein				sigUp
TGME49_212280	3.78744	5.55199	4.94151	0.00033395	0.00260801	0.0799339	hypothetical protein				sigUp
TGME49_285940	3.77829	8.24317	7.75199	4.95512e-06	0.000133421	4.40407	male gamete fusion factor HAP2, putative	HAP2	EES5		sigUp
TGME49_287450	3.76002	5.23404	3.13796	0.00849587	0.0279399	-3.19695	hypothetical protein				sigUp
TGME49_315630	3.75829	7.6367	5.09038	0.000260032	0.00217746	0.336525	hypothetical protein				sigUp
TGME49_230460	3.75666	7.28232	7.16051	1.10237e-05	0.000233838	3.58472	Dpy-30 motif protein				sigUp
TGME49_270450	3.74477	7.89813	3.45009	0.00475613	0.0182333	-2.61858	MCM2/3/5 family protein				sigUp
TGME49_500243	3.73635	4.81734	9.21472	8.13194e-07	3.5152e-05	6.24441	hypothetical protein, conserved				sigUp
TGME49_252065	3.73408	8.40895	11.1107	1.05875e-07	9.20304e-06	8.29101	KRUF family protein				sigUp
TGME49_500263	3.73195	7.33121	6.86725	1.66541e-05	0.000309728	3.16115	dynein assembly factor 3, putative				sigUp
TGME49_289170	3.72927	6.51933	5.47135	0.000139018	0.00136913	0.979592	adenylate cyclase alpha 1				sigUp
TGME49_500158	3.72708	5.21346	5.87985	7.26596e-05	0.000868548	1.64665	calmodulin-binding protein, putative				sigUp
TGME49_285770	3.72266	5.0799	5.85159	7.59377e-05	0.000892278	1.60127	coiled-coil domain-containing protein 189, putative				sigUp
TGME49_257925	3.72134	7.78383	6.4719	2.95671e-05	0.000455584	2.57129	hypothetical protein				sigUp
TGME49_210400	3.72117	9.30726	8.08507	3.21691e-06	9.74457e-05	4.84563	hypothetical protein				sigUp
TGME49_500198	3.72111	5.13755	6.08376	5.30194e-05	0.000703144	1.97075	hypothetical protein, conserved				sigUp
TGME49_500074	3.70319	6.0499	11.3634	8.24761e-08	7.66931e-06	8.53886	DUF4200 domain-containing protein				sigUp
TGME49_500189	3.70059	7.52049	8.17223	2.87905e-06	8.88949e-05	4.95891	E3 ubiquitin-protein ligase, putative				sigUp
TGME49_250720	3.68006	5.62566	6.773	1.90609e-05	0.000341352	3.0225	hypothetical protein				sigUp
TGME49_500060	3.67218	6.66081	7.03029	1.32223e-05	0.000266345	3.39809	dynein light chain, putative				sigUp
TGME49_223120	3.67059	8.6405	9.15489	8.71778e-07	3.65383e-05	6.17395	cyclin-dependent kinase regulatory subunit protein				sigUp
TGME49_285470	3.6655	11.0729	7.6563	5.62335e-06	0.000146006	4.2746	patched family protein				sigUp
TGME49_200240	3.65462	10.3099	4.28403	0.00104435	0.00597539	-1.08556	microneme protein MIC17B				sigUp
TGME49_293800	3.65254	9.55035	9.63673	5.02711e-07	2.58931e-05	6.73055	transmembrane protein 65, putative				sigUp
TGME49_500103	3.63946	10.9269	12.2239	3.64488e-08	4.70131e-06	9.344	hypothetical protein				sigUp
TGME49_292270	3.63687	2.96748	3.23492	0.00709224	0.0245846	-3.01757	SAG-related sequence SRS36C				sigUp
TGME49_267980	3.63487	7.95557	8.13564	3.016e-06	9.20572e-05	4.91148	hypothetical protein				sigUp
TGME49_250020	3.63268	5.78858	6.67403	2.19904e-05	0.000371792	2.87559	hypothetical protein				sigUp
TGME49_319970	3.62795	5.45414	3.34028	0.00583047	0.0212767	-2.82228	subtilisin SUB10				sigUp
TGME49_293250	3.62702	9.60627	5.18775	0.000221145	0.00193278	0.502775	hypothetical protein				sigUp
TGME49_313890	3.62423	10.2888	8.72091	1.45935e-06	5.25051e-05	5.65105	hypothetical protein				sigUp
TGME49_500426	3.62104	5.32999	5.22346	0.000208459	0.00184204	0.563424	hypothetical protein, conserved				sigUp
TGME49_216140	3.62041	9.31235	7.97473	3.70661e-06	0.00010701	4.7009	tetratricopeptide repeat-containing protein ANK1				sigUp
TGME49_278090	3.60001	8.63937	7.60426	6.02657e-06	0.00015371	4.20371	Toxoplasma gondii family A protein				sigUp
TGME49_210210	3.58345	10.1525	3.41603	0.00506588	0.0191545	-2.68176	hypothetical protein				sigUp
TGME49_291830	3.58103	11.6711	6.70914	2.09e-05	0.000363341	2.92786	hypothetical protein, conserved				sigUp
TGME49_292275	3.57921	3.21292	4.1299	0.00137495	0.00735482	-1.36541	SAG-related sequence SRS36E				sigUp
TGME49_264178	3.57754	8.0393	18.4928	3.1148e-10	3.01952e-07	13.8202	flagellar associated protein				sigUp
TGME49_274080	3.57739	7.98863	6.58106	2.51815e-05	0.000410972	2.73633	PIH1 domain-containing protein				sigUp
TGME49_271080	3.57266	6.1573	3.47581	0.00453498	0.017605	-2.57086	hypothetical protein				sigUp
TGME49_268650	3.57018	10.3123	14.7775	4.20845e-09	1.08564e-06	11.4262	chaperone protein ClpB2				sigUp
TGME49_500056	3.56658	11.1972	13.9722	8.0014e-09	1.72938e-06	10.8144	selenoprotein W, putative				sigUp
TGME49_287440	3.5556	4.64991	3.82599	0.00238258	0.0109882	-1.92276	hypothetical protein				sigUp
TGME49_257910	3.55342	8.38089	7.15198	1.1155e-05	0.000234755	3.57257	hypothetical protein				sigUp
TGME49_500073	3.52406	8.53075	8.27795	2.51936e-06	8.0913e-05	5.09506	hypothetical protein, conserved				sigUp
TGME49_228410	3.52328	7.58633	4.2378	0.00113384	0.00633635	-1.16929	Tubulin-tyrosine ligase family protein				sigUp
TGME49_220720	3.51888	4.51171	4.70082	0.000503636	0.00352369	-0.340887	hypothetical protein				sigUp
TGME49_310650	3.50673	3.60078	7.22979	1.00158e-05	0.000217653	3.68309	hypothetical protein				sigUp
TGME49_207130	3.50095	4.71965	6.0537	5.55205e-05	0.00072425	1.92334	SAG-related sequence SRS49A				sigUp
TGME49_289370	3.48811	10.2566	3.48834	0.00443108	0.0173118	-2.54762	hypothetical protein				sigUp
TGME49_315495	3.48543	3.74017	7.13082	1.14882e-05	0.000239872	3.54238	hypothetical protein				sigUp
TGME49_251958	3.47861	4.96369	6.76035	1.94109e-05	0.000343426	3.0038	SAG-related sequence SRS59B				sigUp
TGME49_217420	3.47516	8.30077	9.99429	3.38769e-07	1.99201e-05	7.12809	hypothetical protein				sigUp
TGME49_234380	3.46737	9.80364	8.65134	1.58782e-06	5.63017e-05	5.56526	microneme protein MIC21				sigUp
TGME49_240240	3.46418	6.81718	5.55208	0.000122061	0.00122937	1.11329	subtilisin SUB5				sigUp
TGME49_207350	3.4616	6.09618	7.6894	5.3819e-06	0.000141112	4.31952	hypothetical protein				sigUp
TGME49_242710	3.44839	6.92542	7.58059	6.22006e-06	0.000156669	4.17135	hypothetical protein				sigUp
TGME49_200130	3.44661	7.3771	6.53223	2.70511e-05	0.000426682	2.66271	Toxoplasma gondii family C protein				sigUp
TGME49_294330	3.4456	9.35738	6.69665	2.12812e-05	0.000365206	2.90928	apical membrane antigen AMA4				sigUp
TGME49_500400	3.43813	4.15432	3.42548	0.004978	0.0189082	-2.66424	hypothetical protein, conserved				sigUp
TGME49_500113	3.42813	7.82243	5.60049	0.000112951	0.00116102	1.19302	WD repeat-containing protein				sigUp
TGME49_310045	3.42444	4.44428	6.5464	2.64939e-05	0.000424593	2.68411	hypothetical protein				sigUp
TGME49_500297	3.42348	3.9289	6.82363	1.7725e-05	0.000321422	3.09714	hypothetical protein, conserved				sigUp
TGME49_286670	3.41561	8.02332	9.31473	7.24492e-07	3.23186e-05	6.36132	hypothetical protein				sigUp
TGME49_280570	3.41057	4.70411	5.15254	0.000234449	0.00201818	0.442808	SAG-related sequence SRS35A	SAG4	Bradyzoite	SAG4	sigUp
TGME49_251580	3.40501	3.35277	3.06125	0.00980168	0.0311542	-3.33851	hypothetical protein				sigUp
TGME49_500345	3.392	10.231	9.13289	8.94444e-07	3.70615e-05	6.14794	hypothetical protein, conserved				sigUp
TGME49_233210	3.38964	9.86897	7.22041	1.01463e-05	0.000219298	3.66981	hypothetical protein				sigUp
TGME49_500380	3.38741	7.36001	12.7893	2.18851e-08	3.12813e-06	9.84249	cilia- and flagella-associated protein 46, putative				sigUp
TGME49_270660	3.38654	5.80497	7.10919	1.18397e-05	0.000246567	3.51145	hypothetical protein				sigUp
TGME49_319390	3.38007	4.8069	7.64948	5.67447e-06	0.000146857	4.26534	hypothetical protein				sigUp
TGME49_267045	3.37962	5.60153	4.70003	0.000504327	0.00352544	-0.34229	Ras family protein				sigUp
TGME49_262970	3.37907	5.77682	5.74745	8.94348e-05	0.000991969	1.43304	zinc finger (CCCH type) motif-containing protein				sigUp
TGME49_247720	3.37566	5.64097	2.88475	0.0136199	0.0402657	-3.66253	hypothetical protein				sigUp
TGME49_500424	3.36927	5.91742	6.66726	2.22076e-05	0.000372569	2.86549	radial spoke head protein 3, putative				sigUp
TGME49_500355	3.3688	7.80748	9.26586	7.66467e-07	3.34942e-05	6.30432	ankyrin repeat-containing protein				sigUp
TGME49_215140	3.36586	4.80427	3.55831	0.00389379	0.0157019	-2.41787	hypothetical protein				sigUp
TGME49_301470	3.3626	6.24593	5.17303	0.000226611	0.00196979	0.477711	hypothetical protein				sigUp
TGME49_264630	3.35867	10.7651	7.08035	1.23263e-05	0.000253403	3.47011	hypothetical protein				sigUp
TGME49_278522	3.35269	5.15686	5.29404	0.000185586	0.00169421	0.682775	hypothetical protein				sigUp
TGME49_278420	3.34111	5.33518	4.36843	0.000899396	0.00536351	-0.933274	Toxoplasma gondii family A protein				sigUp
TGME49_215895	3.34105	7.91247	9.39535	6.60539e-07	3.03582e-05	6.45479	AP2 domain-containing protein				sigUp
TGME49_232270	3.33924	8.94323	6.20086	4.4358e-05	0.000614785	2.15419	histidine acid phosphatase superfamily protein				sigUp
TGME49_295685	3.33649	1.01266	3.29172	0.00638103	0.0227301	-2.91231	hypothetical protein				sigUp
TGME49_209610	3.33086	6.60665	3.7635	0.00267064	0.0119048	-2.03807	oocyst wall protein OWP2				sigUp
TGME49_211910	3.32911	6.82138	15.2128	3.01247e-09	9.1037e-07	11.7416	kinesin-related protein 3A, putative				sigUp
TGME49_212970	3.32455	9.88524	3.60999	0.00353992	0.0145921	-2.32207	protein kinase (incomplete catalytic triad)				sigUp
TGME49_252300	3.32184	8.74549	3.72302	0.00287613	0.0125253	-2.11287	hypothetical protein				sigUp
TGME49_204460	3.32098	8.77926	6.74393	1.98756e-05	0.000347801	2.97949	hydroxymethylglutaryl-CoA lyase, putative				sigUp
TGME49_214510	3.31788	9.03224	7.7793	4.78036e-06	0.000129588	4.4408	hypothetical protein				sigUp
TGME49_251665	3.31454	2.41366	2.83171	0.0150337	0.0434808	-3.75929	hypothetical protein				sigUp
TGME49_307460	3.31424	7.23227	9.06191	9.71968e-07	3.96573e-05	6.06369	Toxoplasma gondii family B protein				sigUp
TGME49_306450	3.30825	7.49254	9.86088	3.91995e-07	2.21237e-05	6.98127	short chain dehydrogenase family protein, putative				sigUp
TGME49_238200	3.30447	9.45285	9.72944	4.53312e-07	2.41676e-05	6.83486	alpha/beta hydrolase fold domain-containing protein				sigUp
TGME49_500242	3.29624	4.66011	8.80773	1.31442e-06	4.89463e-05	5.75735	hypothetical protein, conserved				sigUp
TGME49_243740	3.29555	7.42041	11.4587	7.51525e-08	7.26248e-06	8.63096	WD domain, G-beta repeat-containing protein				sigUp
TGME49_202100	3.29359	11.8978	4.65122	0.000548662	0.00372587	-0.428487	hypothetical protein				sigUp
TGME49_233040	3.2888	8.53085	6.93694	1.50836e-05	0.000292067	3.26287	3'5'-cyclic nucleotide phosphodiesterase PDE15				sigUp
TGME49_500069	3.283	5.97079	6.687	2.15808e-05	0.000368765	2.89491	hypothetical protein, conserved				sigUp
TGME49_272260	3.27396	5.83041	5.31418	0.000179554	0.00164856	0.716712	Dpy-30 motif protein				sigUp
TGME49_500199	3.27396	8.35413	5.37594	0.000162312	0.00153615	0.820418	SAG-related sequence				sigUp
TGME49_281470	3.27378	11.1963	5.96646	6.35124e-05	0.000787701	1.78503	hypothetical protein				sigUp
TGME49_248240	3.27077	6.75209	5.92579	6.76463e-05	0.000819648	1.72018	leucine rich repeat-containing protein				sigUp
TGME49_205265	3.26951	7.61919	7.88725	4.1514e-06	0.00011608	4.58507	transporter, cation channel family protein				sigUp
TGME49_500256	3.26781	8.14925	7.78072	4.77151e-06	0.000129588	4.4427	hypothetical protein, conserved				sigUp
TGME49_209755	3.26443	5.64054	9.29429	7.41739e-07	3.27718e-05	6.33751	cyst matrix protein MAG2	MAG2	Bradyzoite	MAG2	sigUp
TGME49_301150	3.26397	6.10451	5.17528	0.000225765	0.00196671	0.481549	SAG-related sequence SRS19B				sigUp
TGME49_500414	3.25668	5.99289	6.49497	2.8577e-05	0.000446349	2.6063	hypothetical protein, conserved				sigUp
TGME49_207970	3.23149	7.92456	7.47018	7.21447e-06	0.000170693	4.01943	HEAT repeat-containing protein				sigUp
TGME49_267680	3.23038	10.8282	5.3676	0.000164535	0.0015498	0.806443	microneme protein MIC12				sigUp
TGME49_500101	3.22213	10.1091	10.3689	2.26714e-07	1.48609e-05	7.53119	fatty acyl-CoA reductase, putative				sigUp
TGME49_269320	3.22101	9.54909	13.1806	1.55515e-08	2.57927e-06	10.1743	hypothetical protein				sigUp
TGME49_234570	3.21985	10.2503	9.20911	8.18502e-07	3.51912e-05	6.23782	sterol carrier protein-2 HAD-2SCP-2				sigUp
TGME49_500370	3.20633	4.57241	7.42662	7.65236e-06	0.000177379	3.95904	histidine phosphatase, putative				sigUp
TGME49_227780	3.20439	9.39362	2.7312	0.0181226	0.0496833	-3.94165	P-type ATPase, putative				sigUp
TGME49_223550	3.20343	8.62185	14.85	3.97793e-09	1.06038e-06	11.4795	hypothetical protein				sigUp
TGME49_313660	3.19874	7.61437	4.68096	0.000521181	0.00360543	-0.375923	hypothetical protein				sigUp
TGME49_254890	3.19687	8.17461	10.8798	1.33584e-07	1.07906e-05	8.05967	CRAL/TRIO domain-containing protein				sigUp
TGME49_500241	3.19225	10.9492	10.4992	1.9771e-07	1.37486e-05	7.66823	cysteine dioxygenase, putative				sigUp
TGME49_267130	3.19129	7.26504	4.54776	0.000656635	0.00427963	-0.61214	SAG-related sequence SRS38A				sigUp
TGME49_321710	3.18305	2.85239	3.98664	0.00177964	0.00889487	-1.62734	Kinase-like domain-containing protein [Source:UniProtKB/TrEMBL;Acc:S8FBM1]				sigUp
TGME49_500020	3.17723	6.16695	3.50919	0.00426348	0.0167461	-2.50894	SAM domain-containing protein				sigUp
TGME49_262800	3.17411	5.4775	3.23286	0.0071195	0.0246364	-3.02138	leucine rich repeat-containing protein				sigUp
TGME49_287470	3.15415	5.94046	3.40437	0.00517667	0.019468	-2.7034	hypothetical protein				sigUp
TGME49_235200	3.15148	10.1238	6.27353	3.97481e-05	0.000569651	2.26704	PAN domain-containing protein				sigUp
TGME49_202255	3.14966	7.07452	8.38028	2.21665e-06	7.41697e-05	5.22556	hypothetical protein				sigUp
TGME49_500042	3.14871	8.41361	5.97633	6.25502e-05	0.000784034	1.80073	AP2 domain transcription factor AP2X-10				sigUp
TGME49_252070	3.14133	8.59094	9.48223	5.98339e-07	2.87726e-05	6.55474	KRUF family protein				sigUp
TGME49_203770	3.13621	6.70338	11.4863	7.31703e-08	7.22399e-06	8.65741	hypothetical protein				sigUp
TGME49_292280	3.09667	3.22199	3.44639	0.00478883	0.0183061	-2.62544	SAG-related sequence SRS36D				sigUp
TGME49_295920	3.09514	7.71379	4.12787	0.00137998	0.00736697	-1.36913	dynein axonemal assembly factor 4, putative				sigUp
TGME49_225290	3.0945	7.87357	6.75446	1.95761e-05	0.000344824	2.99509	GDA1/CD39 (nucleoside phosphatase) family protein				sigUp
TGME49_225070	3.09379	8.50254	6.07391	5.38254e-05	0.000711474	1.95523	hypothetical protein				sigUp
TGME49_304870	3.08596	6.30182	3.84684	0.00229372	0.0106746	-1.88432	hypothetical protein				sigUp
TGME49_233180	3.08106	6.38046	7.53733	6.59107e-06	0.000161859	4.11201	hypothetical protein				sigUp
TGME49_500412	3.08059	5.34574	9.45186	6.19338e-07	2.88169e-05	6.51989	hypothetical protein, conserved				sigUp
TGME49_259965	3.07991	8.14282	3.09693	0.00917098	0.0296085	-3.27271	Bardet-Biedl syndrome 5, putative				sigUp
TGME49_243720	3.07682	11.5043	9.15162	8.75103e-07	3.65383e-05	6.17009	peroxisomal biogenesis factor PEX11				sigUp
TGME49_205590	3.07648	5.82834	6.91139	1.56404e-05	0.000299226	3.22565	centrosomal protein CEP131				sigUp
TGME49_292260	3.07369	6.64757	7.15679	1.10808e-05	0.000234427	3.57942	SAG-related sequence SRS36B				sigUp
TGME49_256020	3.07322	9.49989	5.61096	0.000111078	0.00115199	1.21022	EFHC1, putative				sigUp
TGME49_228310	3.07056	7.40751	7.57191	6.29266e-06	0.000156669	4.15946	hypothetical protein				sigUp
TGME49_301000	3.06651	5.85159	8.52022	1.86409e-06	6.31658e-05	5.40202	methyltransferase				sigUp
TGME49_315900	3.06547	8.232	4.76628	0.000450043	0.00322491	-0.225728	hypothetical protein				sigUp
TGME49_270650	3.06311	8.61456	9.45798	6.15043e-07	2.88169e-05	6.52692	deoxyribose-phosphate aldolase				sigUp
TGME49_305790	3.05939	6.54956	5.10823	0.000252399	0.00213591	0.367097	protein-tyrosine phosphatase, putative				sigUp
TGME49_232955	3.05711	2.08834	2.85362	0.014433	0.0421397	-3.71937	hypothetical protein				sigUp
TGME49_500313	3.05096	5.13735	6.94243	1.49669e-05	0.000291875	3.27085	hypothetical protein, conserved				sigUp
TGME49_288640	3.0497	8.19667	11.7488	5.68541e-08	6.31475e-06	8.90669	radical SAM domain-containing protein				sigUp
TGME49_284310	3.04655	4.38056	4.35838	0.0009155	0.00543926	-0.951369	hypothetical protein				sigUp
TGME49_219650	3.0419	8.56699	7.28177	9.3243e-06	0.00020887	3.75646	transporter, small conductance mechanosensitive ion channel (MscS) family protein				sigUp
TGME49_270260	3.03932	5.84938	7.07382	1.24395e-05	0.00025465	3.46073	hypothetical protein				sigUp
TGME49_318130	3.0389	5.76986	4.28421	0.00104403	0.00597539	-1.08525	Toxoplasma gondii family E protein				sigUp
TGME49_292600	3.0378	6.68102	3.75639	0.00270563	0.0120239	-2.05121	hypothetical protein				sigUp
TGME49_243330	3.03259	7.57893	6.07897	5.34102e-05	0.000707154	1.9632	hypothetical protein				sigUp
TGME49_500000	3.03207	4.66926	3.08461	0.00938405	0.0301383	-3.29544	hypothetical protein				sigUp
TGME49_316130	3.03168	5.78887	6.09294	5.22795e-05	0.000695639	1.98521	hypothetical protein				sigUp
TGME49_500115	3.01383	6.0677	8.54304	1.81255e-06	6.1811e-05	5.43056	EGF-like domain-containing protein				sigUp
TGME49_201100	3.00971	8.65551	3.47971	0.00450238	0.0175295	-2.56363	hypothetical protein				sigUp
TGME49_213720	3.00915	8.94018	11.7615	5.61724e-08	6.31475e-06	8.91859	dynein regulatory complex subunit 7, putative				sigUp
TGME49_222370	3.00628	6.94046	5.02865	0.00028835	0.00233394	0.230482	SAG-related sequence SRS13				sigUp
TGME49_245770	2.9995	4.9184	5.27112	0.000192712	0.00174334	0.644081	hypothetical protein				sigUp
TGME49_259630	2.9964	12.19	10.5853	1.80743e-07	1.30216e-05	7.75795	inner membrane complex protein IMC27				sigUp
TGME49_280580	2.99532	6.68307	4.77126	0.00044622	0.00320613	-0.216994	SAG-related sequence SRS35B				sigUp
TGME49_271010	2.99056	8.50434	3.68475	0.00308532	0.0131016	-2.18366	hypothetical protein				sigUp
TGME49_226610	2.98635	7.0191	7.53349	6.62515e-06	0.000162022	4.10673	centrosomal protein CEP76, putative				sigUp
TGME49_277730	2.97274	3.8717	3.30929	0.00617595	0.0222056	-2.87974	hypothetical protein				sigUp
TGME49_291340	2.96668	6.17302	5.67373	0.000100507	0.00107683	1.31303	hypothetical protein				sigUp
TGME49_259960	2.96321	7.49822	8.56376	1.76705e-06	6.06485e-05	5.45644	Nucleoside-diphosphatase				sigUp
TGME49_266900	2.9578	7.11855	16.3484	1.31005e-09	5.51392e-07	12.5176	cyclin, N-terminal domain-containing protein				sigUp
TGME49_206620	2.95667	8.42207	3.8014	0.00249193	0.0113163	-1.96811	OST-HTH domain-containing protein				sigUp
TGME49_320180	2.95331	7.55577	6.38561	3.36066e-05	0.000504225	2.43962	SAG-related sequence SRS16C				sigUp
TGME49_278365	2.9503	7.12505	5.47056	0.000139195	0.00136918	0.978285	Toxoplasma gondii family A protein				sigUp
TGME49_318880	2.94065	7.94328	3.01266	0.0107312	0.0336275	-3.42799	hypothetical protein				sigUp
TGME49_260400	2.9367	3.96929	5.65455	0.00010362	0.00109755	1.28167	hypothetical protein				sigUp
TGME49_273740	2.93206	9.32847	8.2687	2.54883e-06	8.15319e-05	5.0832	acetyl-CoA acyltransferase B, putative				sigUp
TGME49_265205	2.92422	7.57678	5.76532	8.69495e-05	0.000983	1.46202	WD domain, G-beta repeat-containing protein				sigUp
TGME49_207160	2.92252	5.40429	5.80069	8.22442e-05	0.000944982	1.51923	SAG-related sequence SRS49D				sigUp
TGME49_268970	2.91366	6.35875	6.0518	5.5683e-05	0.00072425	1.92034	hypothetical protein				sigUp
TGME49_500386	2.91321	5.72602	3.92525	0.00198895	0.00961256	-1.74002	hypothetical protein, conserved				sigUp
TGME49_205430	2.91159	6.36925	11.6161	6.45456e-08	6.70353e-06	8.78142	isovaleryl-CoA dehydrogenase				sigUp
TGME49_221685	2.91004	4.83839	4.93441	0.000337981	0.00262156	0.0676352	hypothetical protein				sigUp
TGME49_266660	2.90589	8.2274	10.7383	1.5433e-07	1.16432e-05	7.91572	mediator complex subunit MED9				sigUp
TGME49_272540	2.90487	9.58475	3.56917	0.00381654	0.015485	-2.39773	protein kinase (incomplete catalytic triad)				sigUp
TGME49_210450	2.89644	6.69921	5.12681	0.000244705	0.00209294	0.398868	hypothetical protein				sigUp
TGME49_248440	2.89316	10.4654	5.60581	0.000111995	0.00115714	1.20176	hypothetical protein				sigUp
TGME49_314310	2.89232	4.949	5.32754	0.000175667	0.00161844	0.739191	hypothetical protein				sigUp
TGME49_274140	2.88973	4.96638	3.82523	0.00238589	0.0109971	-1.92416	RNA binding protein, putative				sigUp
TGME49_250220	2.87735	4.82537	4.83611	0.000399395	0.00294103	-0.103458	hypothetical protein				sigUp
TGME49_279450	2.87435	9.56716	8.37225	2.23892e-06	7.46028e-05	5.21537	adenylosuccinate synthetase, putative				sigUp
TGME49_315450	2.87429	7.61125	9.45121	6.19796e-07	2.88169e-05	6.51914	hypothetical protein				sigUp
TGME49_301240	2.87235	8.06778	4.50221	0.000710981	0.00452684	-0.69337	hypothetical protein				sigUp
TGME49_200230	2.87216	6.27067	3.08653	0.00935046	0.0300666	-3.29189	microneme protein MIC17C				sigUp
TGME49_319700	2.87199	7.41535	6.89823	1.59355e-05	0.000299918	3.20645	NEK kinase				sigUp
TGME49_294400	2.87127	9.41439	4.33266	0.000958091	0.00559259	-0.997726	rhoptry neck protein RON2L1				sigUp
TGME49_500300	2.87107	8.4278	14.1968	6.66635e-09	1.52317e-06	10.989	hypothetical protein, conserved				sigUp
TGME49_309185	2.86862	4.74724	8.84321	1.2597e-06	4.72948e-05	5.80055	hypothetical protein				sigUp
TGME49_323400	2.86052	8.88031	4.18335	0.00124949	0.00684147	-1.26813	cytochrome c oxidase subunit iii subfamily protein				sigUp
TGME49_258910	2.85938	11.4354	2.98449	0.0113097	0.0349743	-3.47977	hypothetical protein				sigUp
TGME49_246760	2.84232	10.3007	5.74768	8.94016e-05	0.000991969	1.43342	hypothetical protein				sigUp
TGME49_500320	2.84044	2.36291	3.38001	0.0054159	0.020154	-2.74859	hypothetical protein, conserved				sigUp
TGME49_500408	2.83525	8.27942	3.42746	0.00495977	0.0188514	-2.66057	hypothetical protein, conserved				sigUp
TGME49_207010	2.83151	8.54097	11.2543	9.18129e-08	8.34349e-06	8.43252	SAG-related sequence SRS48K				sigUp
TGME49_500271	2.8282	7.80847	3.75624	0.00270639	0.0120239	-2.05149	vacuolar protein 8, putative				sigUp
TGME49_215885	2.82352	5.83627	3.45493	0.00471364	0.0181476	-2.60959	hypothetical protein				sigUp
TGME49_284420	2.82212	5.61728	4.51707	0.000692756	0.0044462	-0.666847	hypothetical protein				sigUp
TGME49_293810	2.81446	10.8836	9.39721	6.59137e-07	3.03582e-05	6.45694	carboxyvinyl-carboxyphosphonate phosphorylmutase				sigUp
TGME49_256865	2.81129	7.1378	6.54421	2.65792e-05	0.000425107	2.68081	WD repeat domain 35 family protein				sigUp
TGME49_207140	2.81116	6.65005	4.4455	0.000785275	0.00489284	-0.794844	SAG-related sequence SRS49B				sigUp
TGME49_268660	2.80659	8.23002	10.9231	1.2784e-07	1.0432e-05	8.10345	hypothetical protein				sigUp
TGME49_278580	2.80476	10.0838	4.84023	0.000396598	0.00293666	-0.096258	hypothetical protein				sigUp
TGME49_212180	2.80254	8.22905	7.2234	1.01046e-05	0.000218987	3.67404	hypothetical protein				sigUp
TGME49_265320	2.80215	9.93067	4.59224	0.000607725	0.00404998	-0.533031	pre-mRNA-splicing factor CWC2, putative				sigUp
TGME49_222340	2.80049	8.19714	8.22976	2.67695e-06	8.33486e-05	5.03317	NOL1/NOP2/sun family protein				sigUp
TGME49_246650	2.79522	5.85773	4.49397	0.000721314	0.00456357	-0.708106	palmitoyltransferase DHHC18				sigUp
TGME49_264660	2.79124	7.01844	5.76827	8.65463e-05	0.000983	1.4668	SAG-related sequence SRS44	CST1	Bradyzoite	CST1	sigUp
TGME49_272590	2.79081	8.51413	6.9872	1.40491e-05	0.000280177	3.33582	hypothetical protein				sigUp
TGME49_261040	2.78972	5.87482	6.79314	1.8517e-05	0.000332765	3.05224	hypothetical protein				sigUp
TGME49_297480	2.78755	6.28502	4.57386	0.000627458	0.00414693	-0.565692	hypothetical protein				sigUp
TGME49_260830	2.78368	10.6907	7.21427	1.02328e-05	0.000220571	3.6611	AMP-activated protein kinase, putative				sigUp
TGME49_224730	2.7794	8.47028	3.5868	0.00369446	0.0150892	-2.36505	hypothetical protein				sigUp
TGME49_248380	2.7735	7.30469	5.98398	6.18142e-05	0.00078027	1.81291	hypothetical protein				sigUp
TGME49_267875	2.76972	6.71082	9.59097	5.29197e-07	2.62857e-05	6.67874	NBP2b protein, putative				sigUp
TGME49_266910	2.75873	8.48743	6.6539	2.26429e-05	0.000378027	2.84555	cell-cycle-associated protein kinase GSK, putative				sigUp
TGME49_215680	2.75774	8.1958	11.8056	5.38673e-08	6.24314e-06	8.95991	SAG-related sequence SRS18				sigUp
TGME49_237490	2.75342	7.25153	6.92315	1.53815e-05	0.00029601	3.24279	centrin family protein				sigUp
TGME49_224770	2.75253	7.53322	8.74257	1.42166e-06	5.21515e-05	5.67765	SAG-related sequence SRS40D				sigUp
TGME49_255380	2.73803	7.4052	3.78113	0.00258594	0.0116155	-2.00552	hypothetical protein				sigUp
TGME49_238970	2.73345	8.65592	4.52506	0.000683163	0.0044023	-0.652603	hypothetical protein				sigUp
TGME49_217800	2.73109	8.96185	5.09273	0.000259014	0.00217577	0.340551	hypothetical protein				sigUp
TGME49_243190	2.73021	7.12088	6.46352	2.99356e-05	0.000460375	2.55855	Toxoplasma gondii family A protein				sigUp
TGME49_253790	2.71929	7.48209	4.10828	0.00142935	0.00754989	-1.40485	zinc finger (CCCH type) motif-containing protein				sigUp
TGME49_248730	2.71703	4.95517	4.01528	0.00168989	0.00854776	-1.57485	hypothetical protein				sigUp
TGME49_213520	2.71371	10.6547	9.80691	4.16022e-07	2.27872e-05	6.92136	peptidase M20D, amidohydrolase				sigUp
TGME49_265140	2.71317	8.8587	8.02861	3.45822e-06	0.000102427	4.77176	hypothetical protein				sigUp
TGME49_235650	2.7075	9.19113	6.06387	5.46609e-05	0.000717772	1.93939	carrier superfamily protein				sigUp
TGME49_228220	2.70686	7.87565	4.11287	0.00141761	0.00749775	-1.39646	MYND finger domain-containing protein				sigUp
TGME49_254625	2.70401	5.54368	2.82374	0.0152585	0.0438456	-3.77381	hypothetical protein				sigUp
TGME49_239090	2.70153	8.26557	5.55578	0.000121338	0.00122518	1.1194	SAG-related sequence SRS23				sigUp
TGME49_247025	2.69742	9.82091	6.76962	1.91538e-05	0.000341352	3.0175	PITH domain-containing protein				sigUp
TGME49_262470	2.69732	8.13638	5.75025	8.90408e-05	0.000991726	1.43758	C protein immunoglobulin-A-binding beta antigen, putative				sigUp
TGME49_213530	2.69291	7.62235	7.5861	6.17442e-06	0.000156256	4.17889	hypothetical protein				sigUp
TGME49_500080	2.68928	9.77229	9.59851	5.24736e-07	2.62269e-05	6.68729	kinesin-like protein KIN14, putative				sigUp
TGME49_212810	2.68793	7.58351	3.18879	0.00772826	0.0260882	-3.10296	hypothetical protein				sigUp
TGME49_500032	2.68583	7.16249	8.99857	1.04726e-06	4.1256e-05	5.98802	DLEC1 domain-containing protein, putative				sigUp
TGME49_256650	2.67542	5.45784	3.59656	0.0036286	0.0148886	-2.34696	hypothetical protein				sigUp
TGME49_247630	2.67528	7.32222	6.94647	1.48815e-05	0.000290971	3.27672	membrane protein, putative				sigUp
TGME49_281930	2.66577	7.22708	6.18114	4.57049e-05	0.00062586	2.12343	SAG-related sequence SRS39				sigUp
TGME49_330000	2.66268	8.10358	5.11441	0.000249811	0.00212074	0.377676	cytochrome b				sigUp
TGME49_207710	2.65893	10.6385	11.5148	7.11725e-08	7.11458e-06	8.6848	phosphatidylinositol synthase				sigUp
TGME49_313385	2.65135	7.55316	3.69983	0.00300111	0.0128691	-2.15577	hypothetical protein				sigUp
TGME49_213840	2.6486	7.09664	4.24848	0.00111248	0.00625193	-1.14993	choline transporter-like protein, putative				sigUp
TGME49_207005	2.6479	8.4849	11.781	5.51421e-08	6.29959e-06	8.93685	SAG-related sequence SRS48Q				sigUp
TGME49_208430	2.64251	8.32161	6.84279	1.72461e-05	0.000317781	3.12528	serine proteinase inhibitor PI-2, putative				sigUp
TGME49_228145	2.63828	6.7416	7.09099	1.21444e-05	0.000250954	3.48537	hypothetical protein				sigUp
TGME49_224010	2.63785	10.2352	3.72429	0.00286943	0.0125051	-2.11052	hypothetical protein				sigUp
TGME49_210682	2.63508	10.1636	4.3192	0.000981213	0.00568606	-1.02203	hypothetical protein				sigUp
TGME49_320170	2.63237	7.51594	9.27017	7.62658e-07	3.34942e-05	6.30937	SAG-related sequence SRS16E				sigUp
TGME49_205450	2.6315	5.734	6.63761	2.31861e-05	0.000384292	2.82118	hypothetical protein				sigUp
TGME49_256700	2.62982	6.83532	4.75075	0.000462192	0.00329719	-0.252997	hypothetical protein				sigUp
TGME49_216280	2.62729	6.83644	8.90412	1.17136e-06	4.52066e-05	5.87438	adenylate cyclase alpha 2				sigUp
TGME49_273915	2.62714	2.90112	3.2864	0.00644453	0.0228941	-2.92218	hypothetical protein				sigUp
TGME49_233320	2.62512	7.81927	5.57463	0.000117724	0.00119624	1.15048	C2 domain-containing protein				sigUp
TGME49_224810	2.62135	10.3818	4.43152	0.000804794	0.00498138	-0.819901	hypothetical protein				sigUp
TGME49_264070	2.62052	8.69699	2.89206	0.0134358	0.0398096	-3.64918	F5/8 type C domain-containing protein				sigUp
TGME49_285980	2.61796	11.7378	9.57589	5.38252e-07	2.65704e-05	6.66162	phosphoglucomutase PGM1				sigUp
TGME49_245530	2.61239	6.86453	7.24919	9.75151e-06	0.000214238	3.71052	hypothetical protein				sigUp
TGME49_218470	2.60342	9.84248	5.97872	6.23196e-05	0.000783601	1.80453	protein disulfide-isomerase, putative				sigUp
TGME49_207930	2.59622	9.65525	9.14952	8.77248e-07	3.65383e-05	6.16761	phosphatidylethanolamine-binding protein				sigUp
TGME49_305160	2.59253	8.16963	7.52012	6.74515e-06	0.000162964	4.08834	histone H2Ba				sigUp
TGME49_254640	2.57739	6.59645	5.32874	0.000175323	0.00161714	0.741203	DNA polymerase delta subunit 4, putative				sigUp
TGME49_212920	2.57732	9.13083	6.22165	4.29841e-05	0.000602892	2.18655	hypothetical protein				sigUp
TGME49_275795	2.57261	4.55864	5.59521	0.00011391	0.00116786	1.18434	hypothetical protein				sigUp
TGME49_283780	2.56881	11.3854	10.8409	1.38965e-07	1.09938e-05	8.02032	glucose-6-phosphate isomerase GPI				sigUp
TGME49_293280	2.56726	8.50123	7.50525	6.88145e-06	0.000165258	4.06785	cyclin protein				sigUp
TGME49_500210	2.56221	6.88723	2.93588	0.0123825	0.0376083	-3.56897	leucine rich repeat-containing protein				sigUp
TGME49_266500	2.56156	7.70309	5.6029	0.000112517	0.00115805	1.19698	OTU domain-containing protein OTU9				sigUp
TGME49_253640	2.56101	9.55189	5.7669	8.67339e-05	0.000983	1.46457	hypothetical protein				sigUp
TGME49_500366	2.55945	7.21044	8.02435	3.4772e-06	0.000102609	4.76617	hypothetical protein, conserved				sigUp
TGME49_224932	2.55656	10.8606	7.94116	3.87097e-06	0.000110164	4.65656	hypothetical protein				sigUp
TGME49_500085	2.55279	8.52686	8.72921	1.44479e-06	5.25051e-05	5.66125	P-type ATPase, putative				sigUp
TGME49_270273	2.54846	6.54398	9.69879	4.69043e-07	2.46772e-05	6.80047	hypothetical protein				sigUp
TGME49_224275	2.5469	2.72619	5.67757	9.98964e-05	0.00107231	1.3193	hypothetical protein				sigUp
TGME49_228050	2.54381	5.44494	6.98478	1.40971e-05	0.000280434	3.33232	hypothetical protein				sigUp
TGME49_310680	2.53915	10.0973	6.92777	1.5281e-05	0.000295174	3.24952	aminotransferase, class I/II superfamily protein				sigUp
TGME49_306900	2.53246	8.66618	4.95665	0.000325511	0.0025596	0.106173	NOL1/NOP2/sun family protein				sigUp
TGME49_227615	2.52285	4.5936	4.91951	0.000346613	0.00265373	0.0417837	hypothetical protein				sigUp
TGME49_310910	2.51891	9.05054	3.54535	0.00398805	0.0159736	-2.4419	WD domain, G-beta repeat-containing protein				sigUp
TGME49_217610	2.51685	8.08412	5.9975	6.05378e-05	0.000769667	1.83437	hypothetical protein				sigUp
TGME49_237120	2.50585	8.09161	6.15401	4.76285e-05	0.000644547	2.08103	hypothetical protein				sigUp
TGME49_214410	2.48978	8.47056	9.45573	6.1662e-07	2.88169e-05	6.52433	hypothetical protein				sigUp
TGME49_255890	2.4893	10.2114	11.1665	1.00156e-07	8.99942e-06	8.34617	pyridine nucleotide-disulfide oxidoreductase domain-containing protein				sigUp
TGME49_310670	2.48894	12.3824	12.7339	2.29874e-08	3.12813e-06	9.79462	glycogen phosphorylase GP				sigUp
TGME49_318675	2.48466	8.9122	6.41065	3.23773e-05	0.000491311	2.47794	3'5'-cyclic nucleotide phosphodiesterase PDE8				sigUp
TGME49_293740	2.478	11.207	8.71821	1.46413e-06	5.25051e-05	5.64773	hypothetical protein				sigUp
TGME49_304490	2.47617	9.82166	9.86617	3.89723e-07	2.21237e-05	6.98712	hypothetical protein				sigUp
TGME49_210810	2.4595	11.2951	9.31119	7.27442e-07	3.23186e-05	6.35721	conoid associated protein CAP1				sigUp
TGME49_248900	2.45712	8.42028	6.68105	2.17676e-05	0.000369587	2.88606	hypothetical protein				sigUp
TGME49_278910	2.45512	8.25668	4.65103	0.00054884	0.00372587	-0.42882	O-acetylserine (thiol) lyase 2, putative				sigUp
TGME49_240930	2.45334	5.94478	4.38748	0.000869677	0.00526293	-0.899005	MoaC family protein				sigUp
TGME49_254060	2.44477	6.63698	5.16977	0.000227838	0.00197402	0.472166	SAG-related sequence SRS14A				sigUp
TGME49_311670	2.44224	8.87109	7.16711	1.09232e-05	0.00023294	3.59412	transmembrane surface antigen TSA1				sigUp
TGME49_223470	2.43649	5.30358	2.90933	0.0130103	0.0389385	-3.61758	hypothetical protein				sigUp
TGME49_298960	2.43608	9.39905	4.79274	0.000430105	0.00311836	-0.179329	Toxoplasma gondii family C protein				sigUp
TGME49_203135	2.43067	9.4333	8.32131	2.38601e-06	7.75647e-05	5.15051	dynein heavy chain family protein				sigUp
TGME49_246070	2.43039	8.71717	12.7294	2.30786e-08	3.12813e-06	9.79077	SAG-related sequence SRS56				sigUp
TGME49_217728	2.4173	3.54291	4.17927	0.00125863	0.00686582	-1.27554	hypothetical protein				sigUp
TGME49_305610	2.41679	8.7994	9.10203	9.27297e-07	3.80287e-05	6.11139	hypothetical protein				sigUp
TGME49_216490	2.41622	9.70185	8.90094	1.17581e-06	4.52066e-05	5.87053	hypothetical protein				sigUp
TGME49_329800	2.41171	8.81441	4.38189	0.000878282	0.00528592	-0.909048	hypothetical protein				sigUp
TGME49_235000	2.40788	10.6758	8.01276	3.52941e-06	0.000103034	4.75095	phosphorylase family protein				sigUp
TGME49_224620	2.40382	7.14875	5.1037	0.000254314	0.0021453	0.359343	hypothetical protein				sigUp
TGME49_238220	2.39716	6.61629	5.56099	0.000120327	0.00121959	1.128	EGF family domain-containing protein				sigUp
TGME49_262630	2.39556	6.94453	3.29632	0.00632666	0.0226069	-2.90378	hypothetical protein				sigUp
TGME49_500347	2.3887	6.14692	3.16373	0.0080975	0.0269479	-3.1493	hypothetical protein, conserved				sigUp
TGME49_287510	2.38416	6.73891	6.18221	4.56309e-05	0.00062586	2.12509	aromatic amino acid hydrolase AAH1				sigUp
TGME49_500061	2.38378	10.6113	5.44792	0.00014439	0.00140816	0.940631	PAN domain-containing protein				sigUp
TGME49_266360	2.38217	9.10447	7.29069	9.2108e-06	0.000207489	3.76902	hypothetical protein				sigUp
TGME49_319695	2.38013	10.8334	9.02384	1.0165e-06	4.05274e-05	6.01826	hypothetical protein				sigUp
TGME49_258560	2.37368	9.40422	10.4104	2.17012e-07	1.4521e-05	7.57499	hypothetical protein				sigUp
TGME49_312930	2.37286	8.5888	3.72176	0.00288279	0.012536	-2.11521	cystathione gamma lyase				sigUp
TGME49_229390	2.36277	7.30972	5.93792	6.63841e-05	0.000808987	1.73955	hypothetical protein				sigUp
TGME49_257000	2.35925	8.29944	6.76305	1.93356e-05	0.000342853	3.00779	solute carrier family 13, putative				sigUp
TGME49_307070	2.35878	3.91839	3.74672	0.00275397	0.012161	-2.06908	hypothetical protein				sigUp
TGME49_222930	2.3462	9.44405	4.85568	0.000386299	0.00287906	-0.0693031	hypothetical protein				sigUp
TGME49_500259	2.3459	9.17196	6.67873	2.1841e-05	0.000370048	2.8826	hypothetical protein, conserved				sigUp
TGME49_226565	2.34195	5.53057	7.25199	9.71399e-06	0.000214002	3.71447	hypothetical protein				sigUp
TGME49_234370	2.33986	7.90368	5.7016	9.61598e-05	0.00104624	1.35849	SAG-related sequence SRS42				sigUp
TGME49_250360	2.33511	8.84154	9.73465	4.50694e-07	2.41676e-05	6.8407	alpha/beta hydrolase fold domain-containing protein				sigUp
TGME49_310520	2.3343	7.05118	9.78906	4.24309e-07	2.3083e-05	6.90149	3'5'-cyclic nucleotide phosphodiesterase PDE12				sigUp
TGME49_218750	2.32777	7.02597	4.14565	0.00133668	0.00719773	-1.33672	nucleoside triphosphate hydrolase, putative				sigUp
TGME49_304670	2.31399	7.62044	4.96378	0.000321621	0.00254263	0.118499	inner membrane complex protein IMC23				sigUp
TGME49_239780	2.31209	6.18964	2.82603	0.0151935	0.0437689	-3.76963	hypothetical protein				sigUp
TGME49_268300	2.31114	9.4313	8.23619	2.65531e-06	8.33486e-05	5.04145	hypothetical protein				sigUp
TGME49_290000	2.30957	9.2645	5.33514	0.000173496	0.00160528	0.751964	hypothetical protein				sigUp
TGME49_319090	2.30796	8.94117	3.42204	0.00500981	0.0189874	-2.67062	IgA-specific serine endopeptidase				sigUp
TGME49_272890	2.30681	9.75611	5.66595	0.000101757	0.00108451	1.30032	RNA recognition motif-containing protein				sigUp
TGME49_209530	2.30523	8.36575	2.75072	0.0174773	0.0483117	-3.90634	hypothetical protein				sigUp
TGME49_229930	2.30503	10.504	6.835	1.74392e-05	0.000319866	3.11384	p25-alpha family protein				sigUp
TGME49_225820	2.30276	9.80417	10.8321	1.40224e-07	1.09938e-05	8.01133	hypothetical protein				sigUp
TGME49_226420	2.30248	11.3033	6.68191	2.17404e-05	0.000369587	2.88734	dense granule protein GRA69				sigUp
TGME49_248590	2.29432	7.3773	3.80717	0.00246581	0.0112488	-1.95746	hypothetical protein				sigUp
TGME49_233950	2.28658	9.44726	5.03758	0.000284062	0.00230858	0.24585	hypothetical protein				sigUp
TGME49_274290	2.28581	6.56202	5.45794	0.000142067	0.00139229	0.957299	Toxoplasma gondii family B protein				sigUp
TGME49_500108	2.28571	5.95409	4.25468	0.00110028	0.00620739	-1.1387	hypothetical protein, conserved				sigUp
TGME49_272300	2.28291	3.67341	2.91134	0.0129617	0.038822	-3.61391	hypothetical protein				sigUp
TGME49_245432	2.27407	7.06256	5.98351	6.18596e-05	0.00078027	1.81215	dense granule protein GRA19				sigUp
TGME49_214080	2.2733	13.2064	3.55066	0.00394914	0.01587	-2.43205	toxofilin				sigUp
TGME49_256025	2.26488	7.71553	6.3584	3.49988e-05	0.000518306	2.39789	SPEF1 family protein				sigUp
TGME49_266270	2.26396	9.32514	7.02321	1.33545e-05	0.000268332	3.38788	short-chain-acyl-CoA dehydrogenase				sigUp
TGME49_500254	2.26232	8.66884	4.47527	0.000745317	0.00469685	-0.741531	poly [ADP-ribose] polymerase, putative				sigUp
TGME49_258040	2.25548	3.66492	3.37384	0.00547824	0.0203111	-2.76003	hypothetical protein				sigUp
TGME49_318610	2.2518	7.69489	3.28265	0.00648963	0.0229839	-2.92914	AP2 domain transcription factor AP2IV-3				sigUp
TGME49_500339	2.2516	8.00362	9.01721	1.02448e-06	4.05581e-05	6.01034	thrombospondin type 1 domain-containing protein				sigUp
TGME49_276200	2.25147	6.8774	6.0373	5.69378e-05	0.000734406	1.89742	hypothetical protein				sigUp
TGME49_311700	2.24795	7.79948	4.64229	0.000557209	0.00377405	-0.444298	hypothetical protein				sigUp
TGME49_500248	2.24157	4.84395	3.20036	0.00756347	0.0256658	-3.08154	hypothetical protein, conserved				sigUp
TGME49_500168	2.23907	7.14411	6.0343	5.72006e-05	0.000736607	1.89268	cilia- and flagella-associated protein 54, putative				sigUp
TGME49_245980	2.23255	4.48431	5.76216	8.73835e-05	0.000983	1.4569	hypothetical protein				sigUp
TGME49_305100	2.23102	4.72808	3.95509	0.00188421	0.00925863	-1.68522	hypothetical protein				sigUp
TGME49_318660	2.23068	6.77475	6.04887	5.59339e-05	0.000726143	1.91571	protein phosphatase PPM5B				sigUp
TGME49_234340	2.23	4.1448	2.8244	0.0152397	0.0438456	-3.7726	hypothetical protein				sigUp
TGME49_240880	2.22448	8.66152	11.3857	8.06949e-08	7.59197e-06	8.56049	hypothetical protein				sigUp
TGME49_220540	2.219	7.76278	5.96573	6.35841e-05	0.000787701	1.78387	hypothetical protein				sigUp
TGME49_305150	2.21757	7.54871	6.21272	4.35685e-05	0.000606998	2.17266	tetratricopeptide repeat-containing protein				sigUp
TGME49_220880	2.21549	10.382	7.29892	9.10738e-06	0.000206322	3.7806	dynactin subunit 3, putative				sigUp
TGME49_205390	2.21417	8.66101	4.0716	0.00152676	0.0079027	-1.47181	hypothetical protein				sigUp
TGME49_289920	2.21384	5.25871	5.45565	0.000142594	0.00139574	0.953498	hypothetical protein				sigUp
TGME49_275370	2.21092	6.85509	5.35853	0.000166988	0.00156205	0.791239	SAG-related sequence SRS47C				sigUp
TGME49_222040	2.20938	9.88901	8.34503	2.31628e-06	7.65426e-05	5.18075	Ran-interacting Mog1 protein				sigUp
TGME49_244260	2.20589	6.59803	3.51662	0.00420535	0.0165503	-2.49517	hypothetical protein				sigUp
TGME49_233925	2.20297	3.54881	3.69951	0.00300284	0.0128691	-2.15635	hypothetical protein				sigUp
TGME49_216053	2.19447	4.66054	4.00223	0.00173019	0.00870632	-1.59876	hypothetical protein				sigUp
TGME49_267050	2.18557	9.59707	5.6654	0.000101846	0.00108451	1.29942	hydrolase, alpha/beta fold family protein				sigUp
TGME49_309860	2.18387	7.18298	4.1574	0.00130885	0.007077	-1.31533	hypothetical protein				sigUp
TGME49_221295	2.18232	7.91541	3.32013	0.00605278	0.0218825	-2.85964	hypothetical protein				sigUp
TGME49_310160	2.17662	10.2573	4.2835	0.00104533	0.00597539	-1.08653	argonaute AGO				sigUp
TGME49_207600	2.17429	7.87795	5.4131	0.000152785	0.00146678	0.88256	tubulin/FtsZ family, GTPase domain-containing protein				sigUp
TGME49_217530	2.16532	7.38644	7.96232	3.76647e-06	0.000107835	4.68453	dense granule protein GRA63				sigUp
TGME49_226720	2.1552	9.6827	6.33342	3.63307e-05	0.000532119	2.35948	translin family protein				sigUp
TGME49_288010	2.1546	7.70601	9.37603	6.75294e-07	3.06837e-05	6.43245	hypothetical protein				sigUp
TGME49_220420	2.14997	6.86809	3.84048	0.00232048	0.0107673	-1.89605	3'5'-cyclic nucleotide phosphodiesterase PDE5				sigUp
TGME49_280470	2.14861	7.91101	7.04565	1.29402e-05	0.00026132	3.42023	AP2 domain transcription factor AP2VIIa-1				sigUp
TGME49_267740	2.14651	6.32217	4.08946	0.0014785	0.0077329	-1.43919	dense granule protein GRA48				sigUp
TGME49_322500	2.14649	7.16619	5.22248	0.000208798	0.00184226	0.561756	hypothetical protein				sigUp
TGME49_271935	2.1411	8.16328	3.08379	0.00939844	0.0301723	-3.29696	hypothetical protein				sigUp
TGME49_253760	2.12676	3.71838	3.33806	0.00585449	0.0213296	-2.82639	hypothetical protein				sigUp
TGME49_207230	2.12579	10.2758	11.725	5.81598e-08	6.37129e-06	8.88429	hypothetical protein				sigUp
TGME49_239310	2.12438	9.69483	5.67086	0.000100968	0.00107802	1.30833	ribulose 5-phosphate isomerase				sigUp
TGME49_244515	2.11913	5.38701	2.82962	0.0150923	0.0435962	-3.7631	hypothetical protein				sigUp
TGME49_269600	2.11778	10.7849	4.49885	0.000715181	0.00453913	-0.699386	biotin-requiring enzyme domain-containing protein				sigUp
TGME49_500099	2.10698	7.96126	2.90526	0.0131095	0.0391545	-3.62504	hypothetical protein, conserved				sigUp
TGME49_248990	2.09901	11.1955	7.15244	1.11479e-05	0.000234755	3.57323	prenylcysteine oxidase, putative				sigUp
TGME49_500009	2.09864	8.54328	4.56969	0.000632033	0.0041634	-0.573118	kinesin-like protein				sigUp
TGME49_251440	2.09844	9.93087	10.4066	2.17897e-07	1.4521e-05	7.57092	troponin c, isotype gamma, putative				sigUp
TGME49_224170	2.09362	6.11951	3.70642	0.00296501	0.0127343	-2.14357	SAG-related sequence SRS60A				sigUp
TGME49_243940	2.09336	9.91922	4.73377	0.00047587	0.0033767	-0.282851	dense granule protein GRA81	GRA81	Merozoite		sigUp
TGME49_224940	2.08354	7.67302	9.45878	6.14484e-07	2.88169e-05	6.52784	hypothetical protein				sigUp
TGME49_301360	2.08311	6.99483	7.49661	6.96196e-06	0.000166691	4.05593	phosphate transporter, putative				sigUp
TGME49_202140	2.08026	9.58989	4.2811	0.00104979	0.00598801	-1.09086	enoyl-CoA hydratase/isomerase family protein				sigUp
TGME49_313665	2.08009	7.32085	4.51157	0.000699451	0.00446852	-0.676671	hypothetical protein				sigUp
TGME49_239810	2.07901	8.75718	4.60883	0.000590467	0.00395475	-0.503579	hypothetical protein				sigUp
TGME49_226825	2.07702	11.2233	6.09139	5.24042e-05	0.00069614	1.98275	protein phosphatase inhibitor protein				sigUp
TGME49_280500	2.07563	10.1532	2.8672	0.0140727	0.0413899	-3.6946	inorganic anion transporter, sulfate permease (SulP) family protein				sigUp
TGME49_254870	2.07499	8.9652	5.81717	8.01433e-05	0.000930197	1.54584	hypothetical protein				sigUp
TGME49_258850	2.07346	9.39375	5.29618	0.000184935	0.00169089	0.686385	hypothetical protein				sigUp
TGME49_500378	2.07029	9.30391	6.22233	4.29401e-05	0.000602892	2.1876	hypothetical protein, conserved				sigUp
TGME49_255330	2.06917	9.94695	7.26194	9.58192e-06	0.000211676	3.72851	hypothetical protein				sigUp
TGME49_314055	2.06686	10.2666	3.46722	0.00460761	0.0178263	-2.58679	splicing factor, putative				sigUp
TGME49_286000	2.06584	8.41904	4.46196	0.000762908	0.00478133	-0.765347	hypothetical protein				sigUp
TGME49_245485	2.06246	7.99347	3.08753	0.00933315	0.030023	-3.29006	microneme protein MIC9				sigUp
TGME49_255900	2.05911	12.7686	7.33277	8.69502e-06	0.000199238	3.82811	Bax inhibitor-1, putative				sigUp
TGME49_226245	2.05873	6.12595	3.82279	0.00239651	0.0110333	-1.92865	hypothetical protein				sigUp
TGME49_252220	2.04916	10.5573	6.63547	2.32584e-05	0.000384292	2.81798	tetratricopeptide repeat domain containing protein				sigUp
TGME49_500157	2.04623	9.46142	6.55548	2.6143e-05	0.00041981	2.69782	prefoldin, putative				sigUp
TGME49_207650	2.0324	7.71289	5.26724	0.000193944	0.00174903	0.637533	OTU domain-containing protein OTUD1A				sigUp
TGME49_289360	2.03165	9.82792	5.25179	0.00019894	0.00177956	0.611415	hypothetical protein				sigUp
TGME49_258930	2.0306	6.753	5.34236	0.000171459	0.00159437	0.764093	peptidylprolyl isomerase				sigUp
TGME49_272370	2.0305	10.6725	4.12848	0.00137847	0.00736697	-1.36802	tartrolon E responsive gene				sigUp
TGME49_249760	2.02843	10.6443	10.3966	2.20203e-07	1.45534e-05	7.56037	vitamin k epoxide reductase family protein				sigUp
TGME49_289745	2.02198	4.52391	3.03895	0.0102178	0.0322208	-3.3796	hypothetical protein				sigUp
TGME49_268820	2.01802	9.65039	3.13844	0.00848819	0.0279399	-3.19605	hypothetical protein				sigUp
TGME49_203340	2.0096	9.52142	3.26166	0.0067479	0.0236992	-2.96802	metallo-beta-lactamase domain-containing protein				sigUp
TGME49_316635	2.00923	9.97691	4.18784	0.00123951	0.00680793	-1.25996	hypothetical protein				sigUp
TGME49_287280	2.00752	7.79823	5.03117	0.000287133	0.00232814	0.23482	Toxoplasma gondii family C protein				sigUp
TGME49_500384	2.0018	7.48221	3.92083	0.00200498	0.00966475	-1.74816	F-box domain-containing protein				sigUp
TGME49_258720	2.00041	8.92007	5.704	9.57957e-05	0.0010437	1.36239	Ubiquitin family protein, putative				sigUp
TGME49_326800	-8.59777	5.66402	-4.15388	0.00131714	0.00711222	-1.32175	S-Adenosyl homocysteine hydrolase				sigDown
TGME49_244280	-7.99934	5.69353	-3.93841	0.00194205	0.00946393	-1.71585	hypothetical protein				sigDown
TGME49_275470	-7.2835	5.01529	-4.87444	0.000374161	0.00280691	-0.0365926	dense granule protein GRA15				sigDown
TGME49_239580	-7.24485	6.48715	-4.72598	0.000482289	0.00340968	-0.296565	hypothetical protein				sigDown
TGME49_230180	-7.12683	10.4592	-3.45584	0.00470576	0.0181272	-2.60791	dense granule protein GRA24				sigDown
TGME49_305890	-6.55768	7.22386	-6.43745	3.11141e-05	0.000475754	2.51886	hypothetical protein				sigDown
TGME49_250950	-6.53378	3.63095	-3.7502	0.00273645	0.0121103	-2.06264	KRUF family protein				sigDown
TGME49_266970	-6.44328	6.32423	-3.23123	0.00714113	0.0246792	-3.0244	ubiquitin family protein				sigDown
TGME49_255160	-6.40353	7.49212	-3.78093	0.00258688	0.0116155	-2.00589	hypothetical protein				sigDown
TGME49_307760	-6.27386	7.02982	-3.24151	0.00700577	0.0244012	-3.00536	Tubulin-tyrosine ligase family protein				sigDown
TGME49_266100	-5.93862	5.00494	-3.00776	0.0108295	0.0338429	-3.43699	rhoptry kinase family protein ROP41				sigDown
TGME49_226540	-5.9057	6.26151	-4.07733	0.00151109	0.00785197	-1.46134	protein kinase				sigDown
TGME49_286770	-5.7847	6.25236	-3.84835	0.00228742	0.0106662	-1.88154	hypothetical protein				sigDown
TGME49_233870	-5.76894	4.46457	-2.99221	0.0111482	0.034582	-3.46559	hypothetical protein				sigDown
TGME49_268170	-5.73475	1.5838	-7.54758	6.50105e-06	0.000160853	4.1261	hypothetical protein				sigDown
TGME49_233480	-5.71392	7.11881	-3.97561	0.0018155	0.00905148	-1.64756	SAG-related sequence SRS29C	SRS2	Tachyzoite	SRS2	sigDown
TGME49_200340	-5.6757	7.10761	-4.38939	0.000866747	0.00526293	-0.895563	hypothetical protein				sigDown
TGME49_324100	-5.66895	3.87957	-3.19369	0.00765807	0.0259169	-3.09389	hypothetical protein				sigDown
TGME49_320030	-5.62832	8.54874	-3.28741	0.00643238	0.0228723	-2.9203	hypothetical protein				sigDown
TGME49_231780	-5.57519	4.22015	-5.68002	9.95091e-05	0.00106959	1.32329	hypothetical protein				sigDown
TGME49_258220	-5.53565	3.95928	-5.95369	6.47802e-05	0.000798223	1.76471	hypothetical protein				sigDown
TGME49_286230	-5.49035	7.23514	-4.04168	0.0016113	0.00823784	-1.52652	hypothetical protein				sigDown
TGME49_279350	-5.47508	3.86543	-3.97817	0.00180712	0.00901529	-1.64287	hypothetical protein				sigDown
TGME49_202580	-5.47031	9.36013	-3.40482	0.00517232	0.019468	-2.70256	chaperone protein ClpB5, putative				sigDown
TGME49_292110	-5.41458	7.4723	-3.03533	0.010287	0.0323879	-3.38626	formate/nitrite transporter FNT2				sigDown
TGME49_297780	-5.32441	8.0112	-3.17929	0.00786623	0.0264632	-3.12053	DNA gyrase subunit B				sigDown
TGME49_289490	-5.28217	9.2716	-3.66257	0.00321359	0.0135116	-2.22471	protein phosphatase PPM11A, putative				sigDown
TGME49_285480	-5.2694	6.02606	-3.72603	0.0028603	0.0124789	-2.10731	hypothetical protein				sigDown
TGME49_319740	-5.24784	5.45551	-3.54402	0.00399784	0.0159934	-2.44436	transporter, major facilitator family protein				sigDown
TGME49_267760	-5.23517	8.17747	-3.37561	0.00546033	0.0202722	-2.75676	zinc finger CCHC domain-containing protein				sigDown
TGME49_266860	-5.21752	10.3389	-3.73699	0.00280345	0.0123199	-2.08705	BTB/POZ domain-containing protein				sigDown
TGME49_305560	-5.20709	7.14991	-3.01057	0.0107731	0.0336927	-3.43184	Vps51/Vps67 protein				sigDown
TGME49_219530	-5.17013	5.77665	-3.71107	0.00293986	0.0126651	-2.13498	hypothetical protein				sigDown
TGME49_287240	-5.15933	4.34995	-3.11126	0.00892936	0.0290159	-3.24627	hypothetical protein				sigDown
TGME49_224870	-5.1465	8.57984	-2.77538	0.0166944	0.0467291	-3.86166	hypothetical protein				sigDown
TGME49_202572	-5.14306	8.5329	-3.29284	0.00636774	0.0227261	-2.91023	ribophorin i protein				sigDown
TGME49_216770	-5.13846	3.0102	-3.80205	0.00248896	0.0113092	-1.9669	hypothetical protein				sigDown
TGME49_281640	-5.12695	6.75185	-3.85373	0.00226512	0.0105993	-1.87163	hypothetical protein				sigDown
TGME49_225680	-5.12327	5.88595	-4.09076	0.00147505	0.00772491	-1.43682	hypothetical protein				sigDown
TGME49_295380	-5.09176	7.28065	-3.86162	0.00223282	0.0104973	-1.85711	hypothetical protein				sigDown
TGME49_293420	-5.03262	4.3957	-2.88548	0.0136015	0.0402261	-3.6612	apicomplexan amino acid transporter ApiAT5-5				sigDown
TGME49_316235	-4.99184	5.22254	-7.43352	7.58112e-06	0.000176239	3.96863	hypothetical protein				sigDown
TGME49_295410	-4.98898	7.49434	-3.34902	0.00573656	0.0209956	-2.80607	transcription initiation factor TFIID complex subunit TAF6				sigDown
TGME49_293380	-4.92847	5.69941	-3.49614	0.00436759	0.017113	-2.53315	histone lysine acetyltransferase HAT1				sigDown
TGME49_286200	-4.88521	6.52215	-4.75472	0.000459052	0.00328064	-0.246018	hypothetical protein				sigDown
TGME49_257170	-4.86466	7.23482	-3.32054	0.00604817	0.0218757	-2.85888	hypothetical protein				sigDown
TGME49_266390	-4.86433	7.24317	-3.14624	0.0083658	0.0276566	-3.18165	DNA mismatch repair protein, C-terminal domain-containing protein				sigDown
TGME49_311730	-4.83854	6.79093	-2.997	0.011049	0.0343465	-3.45677	hypothetical protein				sigDown
TGME49_254530	-4.83748	5.81017	-4.03374	0.00163453	0.00832568	-1.54105	hypothetical protein				sigDown
TGME49_230140	-4.80773	8.80352	-2.76296	0.0170845	0.047588	-3.88419	vacuolar protein sorting-associated protein 9				sigDown
TGME49_257770	-4.80228	7.61871	-2.84447	0.0146808	0.0427036	-3.73604	histone lysine methyltransferase SET2				sigDown
TGME49_244720	-4.79426	7.0651	-3.27297	0.00660741	0.0233184	-2.94706	hypothetical protein				sigDown
TGME49_228350	-4.79413	7.74964	-3.17237	0.00796826	0.0266843	-3.13333	elongation factor Tu GTP binding domain-containing protein				sigDown
TGME49_201230	-4.77488	7.20684	-3.08077	0.00945149	0.030294	-3.30253	kinesin motor domain-containing protein				sigDown
TGME49_213810	-4.77233	7.84286	-3.09619	0.00918363	0.0296374	-3.27407	iron-sulfur cluster protein ISCA				sigDown
TGME49_273200	-4.76844	7.73037	-3.13355	0.00856591	0.0281321	-3.20509	hypothetical protein				sigDown
TGME49_268260	-4.76562	7.52237	-3.48042	0.00449647	0.0175183	-2.56231	hypothetical protein				sigDown
TGME49_220190	-4.7551	5.34516	-5.75488	8.83927e-05	0.000990023	1.44509	hypothetical protein				sigDown
TGME49_313120	-4.74756	5.64915	-3.65776	0.00324214	0.0136121	-2.23362	DNA-directed RNA polymerase, alpha subunit				sigDown
TGME49_207665	-4.73926	7.11438	-3.30073	0.00627505	0.0224526	-2.89561	kinesin motor domain-containing protein				sigDown
TGME49_276190	-4.72831	8.42567	-3.45923	0.00467631	0.0180516	-2.60162	hypothetical protein				sigDown
TGME49_268240	-4.68111	5.43356	-4.47262	0.000748783	0.00471498	-0.746269	hypothetical protein				sigDown
TGME49_267650	-4.66494	8.04705	-2.81065	0.0156345	0.0446055	-3.79761	hypothetical protein				sigDown
TGME49_304640	-4.65458	5.70649	-3.20177	0.00754367	0.0256658	-3.07893	hypothetical protein				sigDown
TGME49_257580	-4.65029	5.48712	-4.38639	0.000871341	0.00526293	-0.900955	hypothetical protein				sigDown
TGME49_268250	-4.60315	8.58088	-2.91423	0.0128922	0.0386862	-3.60862	WD domain, G-beta repeat-containing protein				sigDown
TGME49_247652	-4.58982	8.6244	-2.8271	0.0151633	0.0437134	-3.76769	peroxisome assembly protein PEX12, putative				sigDown
TGME49_233245	-4.58805	6.71625	-3.28874	0.00641647	0.0228258	-2.91783	hypothetical protein				sigDown
TGME49_323000	-4.58467	1.51687	-5.21746	0.000210539	0.0018502	0.553229	KRUF family protein				sigDown
TGME49_249190	-4.56042	6.74046	-3.25325	0.00685441	0.0239994	-2.98361	AP2 domain transcription factor AP2XII-6				sigDown
TGME49_209770	-4.46046	6.86597	-3.20048	0.00756178	0.0256658	-3.08132	helicase, putative				sigDown
TGME49_263860	-4.43471	8.09252	-2.81882	0.0153986	0.0441214	-3.78275	telomere length and silencing protein 1, putative				sigDown
TGME49_277860	-4.41547	7.6217	-4.0804	0.00150278	0.00781895	-1.45574	hypothetical protein				sigDown
TGME49_217720	-4.40004	7.40094	-3.78395	0.00257263	0.0115906	-2.00031	hypothetical protein				sigDown
TGME49_233460	-4.38203	8.15287	-4.34387	0.000939286	0.00553943	-0.977519	SAG-related sequence SRS29B	SAG1	Tachyzoite	SAG1	sigDown
TGME49_220740	-4.35182	2.40852	-5.2359	0.000204223	0.00181262	0.584503	hypothetical protein				sigDown
TGME49_251740	-4.35157	7.10008	-2.9433	0.0122123	0.0371762	-3.55537	AP2 domain transcription factor AP2XII-9				sigDown
TGME49_244240	-4.35019	5.95042	-3.27794	0.00654663	0.0231447	-2.93785	methyltransferase, putative				sigDown
TGME49_283830	-4.33811	5.61647	-3.40258	0.00519387	0.0195093	-2.70672	type I inorganic pyrophosphatase PPase				sigDown
TGME49_500034	-4.33807	1.47592	-5.27858	0.000190361	0.00173187	0.656684	hypothetical protein, conserved				sigDown
TGME49_238410	-4.33282	7.39152	-2.74159	0.0177764	0.0489524	-3.92288	hypothetical protein				sigDown
TGME49_246200	-4.32509	8.06026	-2.95975	0.0118436	0.0362609	-3.5252	zinc finger (CCCH type) motif-containing protein				sigDown
TGME49_263540	-4.32276	8.63729	-2.87604	0.0138426	0.0408185	-3.67844	hypothetical protein				sigDown
TGME49_261580	-4.30495	4.5255	-4.07168	0.00152655	0.0079027	-1.47167	histone H2AX				sigDown
TGME49_263690	-4.29602	5.44146	-3.13978	0.00846714	0.0279109	-3.19359	hypothetical protein				sigDown
TGME49_307030	-4.28689	10.1763	-2.75931	0.0172007	0.0478448	-3.8908	Purine nucleoside phosphorylase				sigDown
TGME49_254830	-4.28155	6.32104	-3.49571	0.00437111	0.0171184	-2.53395	hypothetical protein				sigDown
TGME49_213300	-4.27729	6.80271	-2.76844	0.0169114	0.0472372	-3.87426	hypothetical protein				sigDown
TGME49_309010	-4.27559	8.17179	-2.94704	0.0121275	0.0369723	-3.54851	elongation factor P, putative				sigDown
TGME49_329000	-4.26325	2.46682	-5.34854	0.000169735	0.00158202	0.774477	hypothetical protein				sigDown
TGME49_271420	-4.26173	5.91389	-4.72059	0.000486779	0.00342975	-0.306048	porphobilinogen deaminase				sigDown
TGME49_201710	-4.2413	8.45992	-2.75865	0.0172219	0.0478872	-3.892	WD domain, G-beta repeat-containing protein				sigDown
TGME49_316370	-4.21796	6.46161	-15.2324	2.96826e-09	9.1037e-07	11.7555	hypothetical protein				sigDown
TGME49_271370	-4.21383	7.35654	-3.20922	0.00743979	0.0254148	-3.06515	hypothetical protein				sigDown
TGME49_228710	-4.19537	7.56107	-2.93121	0.0124906	0.0378074	-3.57752	hypothetical protein				sigDown
TGME49_305455	-4.19415	7.76286	-3.10137	0.00909534	0.0294237	-3.26451	hypothetical protein				sigDown
TGME49_226350	-4.1918	7.0342	-2.90641	0.0130813	0.039107	-3.62293	hypothetical protein				sigDown
TGME49_300780	-4.16636	2.77039	-6.70525	2.10177e-05	0.000363806	2.92208	hypothetical protein				sigDown
TGME49_270760	-4.14608	7.29932	-3.30527	0.00622231	0.0223238	-2.8872	asparagine synthase				sigDown
TGME49_233450	-4.1385	6.38211	-6.55895	2.60103e-05	0.000419363	2.70305	SAG-related sequence SRS29A				sigDown
TGME49_288250	-4.10225	6.74405	-3.12681	0.00867418	0.0284176	-3.21754	WD repeat-containing protein				sigDown
TGME49_287960	-4.09646	5.62981	-3.36016	0.00561912	0.0206508	-2.7854	hypothetical protein				sigDown
TGME49_318300	-4.09583	6.45016	-2.78264	0.0164706	0.0463135	-3.8485	hypothetical protein				sigDown
TGME49_328500	-4.06803	3.71668	-3.11268	0.00890563	0.0289623	-3.24363	hypothetical protein				sigDown
TGME49_204050	-4.06397	7.337	-5.61133	0.000111011	0.00115199	1.21084	subtilisin SUB1				sigDown
TGME49_313520	-4.0523	5.76043	-3.83454	0.00234573	0.0108558	-1.907	hypothetical protein				sigDown
TGME49_232040	-4.04355	6.20737	-2.89898	0.0132637	0.0394018	-3.63652	cell division control protein CDC50.2				sigDown
TGME49_500240	-4.03438	6.60458	-2.90221	0.0131842	0.0392387	-3.63062	hypothetical protein, conserved				sigDown
TGME49_500208	-4.03122	4.18786	-2.88008	0.0137391	0.040588	-3.67108	hypothetical protein, conserved				sigDown
TGME49_268350	-4.02329	6.91661	-2.84433	0.0146849	0.0427036	-3.73631	WD repeat-containing protein				sigDown
TGME49_230910	-4.01351	6.21382	-3.0819	0.00943162	0.0302576	-3.30045	hypothetical protein				sigDown
TGME49_315740	-3.98503	5.16746	-3.07754	0.00950854	0.0304159	-3.30848	SAG-related sequence SRS54				sigDown
TGME49_277950	-3.9681	9.38816	-3.26776	0.00667175	0.0234626	-2.95671	lipase				sigDown
TGME49_325300	-3.96714	5.33005	-3.13117	0.00860402	0.0282224	-3.20949	proteasome subunit alpha type, putative				sigDown
TGME49_273990	-3.94437	6.99314	-2.90695	0.0130681	0.0390822	-3.62194	CobW/P47K family protein				sigDown
TGME49_202568	-3.94373	5.92385	-2.95718	0.0119005	0.0363932	-3.52992	FAM32A domain-containing protein				sigDown
TGME49_218955	-3.92018	5.13936	-3.08958	0.00929757	0.0299447	-3.28628	hypothetical protein				sigDown
TGME49_263800	-3.91572	5.91923	-3.16377	0.0080969	0.0269479	-3.14923	RNase P subunit p30, putative				sigDown
TGME49_217400	-3.91259	7.85262	-3.41822	0.00504543	0.0190953	-2.67771	hypothetical protein				sigDown
TGME49_500174	-3.90815	4.11389	-3.60452	0.00357578	0.0147248	-2.33221	KRUF family protein				sigDown
TGME49_500102	-3.87141	2.17807	-9.02206	1.01863e-06	4.05274e-05	6.01614	hypothetical protein, conserved				sigDown
TGME49_500017	-3.85109	6.23342	-8.91653	1.1542e-06	4.48063e-05	5.88936	hypothetical protein, conserved				sigDown
TGME49_209830	-3.84944	6.64721	-3.00387	0.0109083	0.0339961	-3.44414	leucine-rich repeat-containing protein LRRC45, putative				sigDown
TGME49_200350	-3.84864	11.2361	-5.72591	9.25306e-05	0.00101641	1.39805	subtilisin SUB3				sigDown
TGME49_262050	-3.82938	4.56751	-4.90435	0.000355637	0.00270345	0.0154408	rhoptry kinase family protein ROP39				sigDown
TGME49_288880	-3.82059	6.28641	-2.86728	0.0140705	0.0413899	-3.69444	hypothetical protein				sigDown
TGME49_278965	-3.7486	5.87293	-3.49462	0.0043799	0.0171444	-2.53597	hypothetical protein				sigDown
TGME49_220180	-3.74653	5.07709	-4.59128	0.000608743	0.00405339	-0.534741	hypothetical protein				sigDown
TGME49_278240	-3.74191	9.18669	-3.34729	0.00575505	0.0210536	-2.80928	Zn-finger in Ran binding protein and others domain-containing protein				sigDown
TGME49_251570	-3.7266	6.18868	-3.36045	0.00561612	0.0206493	-2.78487	CAAX amino terminal protease family protein				sigDown
TGME49_259130	-3.71138	6.53043	-2.90476	0.0131217	0.0391545	-3.62595	4-hydroxybenzoate polyprenyl transferase				sigDown
TGME49_283840	-3.67664	5.04021	-13.0626	1.7224e-08	2.7008e-06	10.0752	GATA zinc finger domain-containing protein				sigDown
TGME49_325400	-3.64715	3.31615	-6.42794	3.15566e-05	0.000479768	2.50434	ribosomal L37ae family protein				sigDown
TGME49_216785	-3.55995	7.65021	-3.30909	0.00617826	0.0222056	-2.88011	hypothetical protein				sigDown
TGME49_279540	-3.5432	1.65811	-5.87638	7.30542e-05	0.000870663	1.64108	hypothetical protein				sigDown
TGME49_233770	-3.53919	9.01244	-11.1333	1.0352e-07	9.09722e-06	8.31336	calcium-translocating P-type ATPase, PMCA-type protein				sigDown
TGME49_500246	-3.53817	5.05716	-3.53116	0.00409392	0.0162396	-2.46821	intraflagellar transport protein IFT88, putative				sigDown
TGME49_293425	-3.52964	2.65671	-4.79022	0.000431962	0.00312616	-0.183742	apicomplexan amino acid transporter ApiAT5-6				sigDown
TGME49_231230	-3.51899	3.82253	-3.92795	0.00197922	0.00959844	-1.73506	hypothetical protein				sigDown
TGME49_204160	-3.51795	9.26308	-4.03899	0.00161913	0.00826303	-1.53144	GYF domain-containing protein				sigDown
TGME49_328400	-3.50784	2.61524	-2.73678	0.0179359	0.0492899	-3.93158	aminotransferase, class V family protein				sigDown
TGME49_250955	-3.47904	4.33087	-3.66879	0.00317708	0.013395	-2.2132	KRUF family protein				sigDown
TGME49_250500	-3.47078	1.30612	-3.45771	0.00468944	0.018073	-2.60443	hypothetical protein				sigDown
TGME49_260325	-3.45895	5.64339	-3.01063	0.0107718	0.0336927	-3.43172	hypothetical protein				sigDown
TGME49_306480	-3.44213	6.06695	-5.96208	6.3944e-05	0.000789136	1.77807	CAM kinase, CDPK family				sigDown
TGME49_211720	-3.3455	10.8918	-3.11536	0.00886138	0.0288654	-3.2387	AP2 domain transcription factor AP2IV-5				sigDown
TGME49_299010	-3.3371	6.77662	-5.0758	0.000266447	0.00220235	0.311523	hypothetical protein				sigDown
TGME49_209970	-3.30444	8.85204	-3.94072	0.00193394	0.00945335	-1.71161	Spc97 / Spc98 family protein				sigDown
TGME49_214150	-3.29327	8.83846	-4.70871	0.000496836	0.00349139	-0.326977	mitochondrial import inner membrane translocase subunit TIM23				sigDown
TGME49_222420	-3.2924	7.6816	-3.16474	0.00808235	0.0269327	-3.14744	hypothetical protein				sigDown
TGME49_234670	-3.28685	5.84808	-4.4898	0.000726599	0.00458612	-0.71556	actin-like family protein				sigDown
TGME49_204270	-3.2591	8.0327	-6.2268	4.26507e-05	0.000601548	2.19455	dense granule protein GRA60				sigDown
TGME49_236850	-3.25134	7.73307	-3.28916	0.00641145	0.0228181	-2.91705	hypothetical protein				sigDown
TGME49_257430	-3.23158	6.9037	-4.38661	0.000871014	0.00526293	-0.900572	hypothetical protein				sigDown
TGME49_500391	-3.22266	9.73585	-7.44293	7.4852e-06	0.000175344	3.98168	copper amine oxidase, putative	AO2	EES5		sigDown
TGME49_272595	-3.20192	5.2256	-3.18513	0.00778112	0.0262003	-3.10973	hypothetical protein				sigDown
TGME49_285860	-3.14682	6.23235	-3.58393	0.00371405	0.015146	-2.37037	SAG-related sequence SRS20C				sigDown
TGME49_265455	-3.14231	6.56008	-10.2207	2.65392e-07	1.64522e-05	7.37328	hypothetical protein				sigDown
TGME49_248610	-3.11125	8.94817	-3.87283	0.00218769	0.0103582	-1.83645	apicomplexan amino acid transporter ApiAT5-1				sigDown
TGME49_214600	-3.11024	8.29635	-3.74586	0.00275829	0.0121733	-2.07066	hypothetical protein				sigDown
TGME49_328200	-3.107	5.68172	-2.72709	0.0182616	0.0499617	-3.94909	phosphatidylinositol 4-kinase				sigDown
TGME49_200430	-3.09202	7.80966	-7.16231	1.09963e-05	0.000233838	3.58728	cytidine and deoxycytidylate deaminase zinc-binding region domain-containing protein				sigDown
TGME49_204090	-3.09083	2.30346	-4.05559	0.0015714	0.00810741	-1.50107	eIF2 kinase IF2K-C				sigDown
TGME49_319580	-3.08809	9.04773	-4.79585	0.000427823	0.00310463	-0.173882	hypothetical protein				sigDown
TGME49_268850	-3.08771	11.5847	-10.0913	3.04949e-07	1.83359e-05	7.2338	enolase 2	ENO2	Tachyzoite	ENO2	sigDown
TGME49_279355	-3.05931	2.26644	-10.2687	2.52138e-07	1.61308e-05	7.42466	hypothetical protein				sigDown
TGME49_209960	-3.0518	9.84073	-4.17651	0.00126486	0.00689038	-1.28056	glycosyltransferase				sigDown
TGME49_312120	-2.98788	3.55999	-7.57377	6.27703e-06	0.000156669	4.16201	hypothetical protein				sigDown
TGME49_327500	-2.98249	1.52885	-3.96238	0.00185952	0.00917818	-1.67185	hypothetical protein				sigDown
TGME49_204100	-2.98112	8.90319	-4.74436	0.000467296	0.0033247	-0.26424	eIF2 kinase IF2K-C				sigDown
TGME49_269460	-2.96215	9.45212	-6.37142	3.43251e-05	0.000512123	2.41787	basal complex component BCC5				sigDown
TGME49_226532	-2.95693	4.21514	-6.90041	1.58862e-05	0.000299918	3.20963	hypothetical protein				sigDown
TGME49_315360	-2.93806	10.3887	-3.14063	0.00845363	0.0278893	-3.192	inner centromere protein INCENP2				sigDown
TGME49_209130	-2.9155	6.75913	-4.69099	0.000512244	0.00355592	-0.358228	regulator of chromosome condensation (RCC1) repeat-containing protein				sigDown
TGME49_230110	-2.90367	8.85178	-5.27211	0.000192395	0.00174245	0.645768	hypothetical protein				sigDown
TGME49_297150	-2.8848	9.43643	-4.93483	0.000337743	0.00262156	0.0683555	MORN repeat-containing protein				sigDown
TGME49_244360	-2.88054	2.91383	-5.44831	0.0001443	0.00140816	0.941273	OST-HTH associated domain-containing protein				sigDown
TGME49_297910	-2.88054	3.0076	-4.34698	0.000934134	0.00551719	-0.971913	hypothetical protein				sigDown
TGME49_226710	-2.87595	11.2847	-8.85715	1.23886e-06	4.68276e-05	5.81749	hypothetical protein				sigDown
TGME49_256792	-2.87096	3.52721	-4.32705	0.000967663	0.00562941	-1.00786	hypothetical protein				sigDown
TGME49_268182	-2.86896	5.21273	-4.53499	0.000671417	0.00434411	-0.634885	transporter, major facilitator family protein				sigDown
TGME49_318770	-2.8567	8.86503	-3.10532	0.00902871	0.0292792	-3.25723	aurora-related kinase ARK2				sigDown
TGME49_291890	-2.85489	9.03449	-4.45605	0.000770871	0.0048199	-0.775947	microneme protein MIC1	MIC1	Tachyzoite	MIC1	sigDown
TGME49_323010	-2.83219	4.14556	-3.06719	0.00969382	0.0308605	-3.32757	hypothetical protein				sigDown
TGME49_238170	-2.82849	7.53668	-3.15937	0.00816357	0.0270888	-3.15737	IMC-associated protein IAP3				sigDown
TGME49_226755	-2.82681	7.81998	-3.52051	0.0041752	0.0164884	-2.48794	3'5'-cyclic nucleotide phosphodiesterase PDE18				sigDown
TGME49_246210	-2.81158	3.52497	-4.68438	0.000518121	0.00358737	-0.369899	hypothetical protein				sigDown
TGME49_318430	-2.80013	10.846	-10.9336	1.26488e-07	1.04281e-05	8.11404	malate dehydrogenase MDH				sigDown
TGME49_251640	-2.79887	7.10578	-7.91855	3.98604e-06	0.000112637	4.62662	ubiquitin-conjugating enzyme subfamily protein				sigDown
TGME49_283882	-2.78116	7.72002	-4.29666	0.0010212	0.00587518	-1.06273	hypothetical protein				sigDown
TGME49_297790	-2.77978	9.53037	-5.69682	9.68916e-05	0.00105135	1.3507	hypothetical protein				sigDown
TGME49_234640	-2.76621	8.79053	-3.97343	0.00182266	0.0090702	-1.65155	hypothetical protein				sigDown
TGME49_269425	-2.75366	1.55332	-2.82897	0.0151105	0.0436083	-3.76427	hypothetical protein				sigDown
TGME49_263520	-2.74856	9.73954	-5.91468	6.88242e-05	0.000832658	1.70243	microtubule associated protein SPM1				sigDown
TGME49_277270	-2.73686	10.4324	-6.30037	3.81763e-05	0.000552073	2.30853	NTPase II				sigDown
TGME49_215955	-2.73123	1.31344	-3.25697	0.00680706	0.0238755	-2.97671	hypothetical protein				sigDown
TGME49_297725	-2.73123	1.26488	-6.47628	2.93764e-05	0.000454182	2.57794	hypothetical protein				sigDown
TGME49_217875	-2.73039	5.68671	-4.65885	0.00054147	0.0036915	-0.414991	hypothetical protein				sigDown
TGME49_286595	-2.72999	0.503403	-4.49965	0.000714173	0.00453633	-0.697945	hypothetical protein				sigDown
TGME49_211280	-2.69404	8.25399	-2.92237	0.0126981	0.0382042	-3.59372	hypothetical protein				sigDown
TGME49_269380	-2.68056	4.54887	-2.91569	0.0128572	0.0386101	-3.60595	hypothetical protein				sigDown
TGME49_232190	-2.67531	8.01345	-3.35528	0.00567031	0.0207991	-2.79446	guanine nucleotide exchange factor GBF1				sigDown
TGME49_289710	-2.65533	10.68	-4.5344	0.000672112	0.00434509	-0.635943	AP2 domain transcription factor AP2IX-5				sigDown
TGME49_217740	-2.65427	7.58531	-6.01554	5.88768e-05	0.000752136	1.86298	3-ketoacyl-(acyl-carrier-protein) reductase				sigDown
TGME49_215990	-2.65233	7.14661	-3.72696	0.00285546	0.0124789	-2.1056	helicase, putative				sigDown
TGME49_268176	-2.63363	5.82278	-4.52361	0.000684893	0.00440692	-0.655187	hypothetical protein				sigDown
TGME49_234600	-2.62814	6.42465	-6.34592	3.56574e-05	0.000526111	2.37872	hypothetical protein				sigDown
TGME49_500419	-2.62562	6.45073	-3.62449	0.00344669	0.0142814	-2.29522	hypothetical protein				sigDown
TGME49_241240	-2.60578	9.01329	-4.37775	0.00088472	0.00530211	-0.916495	dense granule protein GRA65				sigDown
TGME49_265542	-2.59156	3.14589	-2.92152	0.0127181	0.03825	-3.59527	protein phosphatase 2C domain-containing protein				sigDown
TGME49_259050	-2.58633	6.31731	-3.71952	0.00289464	0.0125419	-2.11934	hypothetical protein				sigDown
TGME49_273280	-2.58523	8.04584	-8.29605	2.46274e-06	7.94647e-05	5.11824	hypothetical protein				sigDown
TGME49_289910	-2.58248	7.95556	-5.58917	0.000115015	0.00117769	1.17441	haloacid dehalogenase-like hydrolase HAD2a				sigDown
TGME49_500127	-2.57165	8.66317	-2.76023	0.0171714	0.0477967	-3.88914	hypothetical protein, conserved				sigDown
TGME49_233090	-2.57095	7.43954	-3.92175	0.00200161	0.00965434	-1.74645	XPG N-terminal domain-containing protein				sigDown
TGME49_289800	-2.55926	9.03144	-6.70182	2.11223e-05	0.000364827	2.91698	transmembrane emp24 domain-containing protein				sigDown
TGME49_313240	-2.55877	7.8528	-2.79493	0.0160985	0.0455232	-3.82618	ethylene-responsive RNA helicase, putative				sigDown
TGME49_267690	-2.55011	8.05528	-2.88584	0.0135924	0.0402141	-3.66055	hypothetical protein				sigDown
TGME49_216000	-2.54976	9.89378	-3.80245	0.00248718	0.0113092	-1.96618	alveolin domain containing intermediate filament IMC3				sigDown
TGME49_269990	-2.54933	9.65379	-3.63323	0.00339174	0.014088	-2.27904	hypothetical protein				sigDown
TGME49_229780	-2.54696	7.91741	-4.92981	0.000340625	0.00263186	0.0596458	GHMP kinase, N-terminal domain-containing protein				sigDown
TGME49_310370	-2.54126	9.03045	-8.22951	2.6778e-06	8.33486e-05	5.03285	hypothetical protein				sigDown
TGME49_262730	-2.53385	5.24104	-3.75199	0.00272752	0.0120909	-2.05934	rhoptry protein ROP16				sigDown
TGME49_313210	-2.53321	6.09811	-3.56595	0.00383928	0.0155378	-2.4037	hypothetical protein				sigDown
TGME49_500269	-2.51986	1.87024	-5.77479	8.5663e-05	0.000977242	1.47735	hypothetical protein, conserved				sigDown
TGME49_316200	-2.51262	7.98593	-3.22558	0.00721657	0.0248754	-3.03486	phosphoglycerate mutase family protein				sigDown
TGME49_314875	-2.49049	8.66184	-3.59093	0.00366646	0.0150055	-2.3574	RIC1 protein				sigDown
TGME49_218800	-2.48237	6.708	-3.96747	0.00184242	0.00912289	-1.66249	hypothetical protein				sigDown
TGME49_261740	-2.47806	7.64276	-4.1626	0.00129673	0.00703304	-1.30587	rhoptry protein ROP47				sigDown
TGME49_249490	-2.47191	7.95931	-3.0614	0.00979898	0.0311542	-3.33824	hypothetical protein				sigDown
TGME49_263030	-2.46969	4.50502	-2.75537	0.0173271	0.0481097	-3.89794	dynein light chain 8 family E protein				sigDown
TGME49_226330	-2.45906	6.07277	-4.69211	0.000511251	0.00355387	-0.356242	hypothetical protein				sigDown
TGME49_219730	-2.45802	7.89492	-4.86717	0.00037882	0.00283389	-0.0492726	hypothetical protein				sigDown
TGME49_244530	-2.4546	9.7308	-5.75084	8.89571e-05	0.000991726	1.43855	dense granule protein GRA49				sigDown
TGME49_320650	-2.45246	6.43057	-3.91146	0.00203936	0.00980095	-1.76538	ankyrin repeat-containing protein				sigDown
TGME49_277490	-2.45148	7.3997	-5.35557	0.000167799	0.00156579	0.786263	hypothetical protein				sigDown
TGME49_249300	-2.42284	7.5808	-3.31294	0.00613424	0.0221062	-2.87298	hypothetical protein				sigDown
TGME49_205562	-2.42272	8.59997	-2.75485	0.0173438	0.0481256	-3.89887	hypothetical protein				sigDown
TGME49_315705	-2.42097	2.78108	-6.90074	1.58788e-05	0.000299918	3.21011	hypothetical protein				sigDown
TGME49_253770	-2.41265	1.44367	-3.85442	0.00226228	0.0105984	-1.87036	hypothetical protein				sigDown
TGME49_284190	-2.40641	10.1403	-3.28368	0.00647717	0.0229499	-2.92722	pyruvate carboxylase				sigDown
TGME49_262540	-2.38318	7.8234	-4.59837	0.000601295	0.00401382	-0.522158	protein kinase, putative				sigDown
TGME49_277240	-2.38122	8.80711	-3.8551	0.00225948	0.0105984	-1.86911	NTPase I				sigDown
TGME49_217880	-2.3785	8.60795	-5.08491	0.00026242	0.00218594	0.327149	RNA-binding protein Nova-1, putative				sigDown
TGME49_215540	-2.37633	2.52756	-2.78304	0.0164585	0.0462957	-3.84778	hypothetical protein				sigDown
TGME49_291960	-2.37268	7.64152	-6.74892	1.97333e-05	0.000346794	2.98688	rhoptry kinase family protein ROP40 (incomplete catalytic triad)				sigDown
TGME49_271120	-2.36582	9.35999	-3.24248	0.00699309	0.0243783	-3.00355	endonuclease/exonuclease/phosphatase family protein				sigDown
TGME49_319520	-2.36571	6.7034	-2.83936	0.0148211	0.0429506	-3.74535	hypothetical protein				sigDown
TGME49_212740	-2.36181	5.81862	-5.4387	0.000146564	0.00142366	0.925278	aromatic amino acid hydrolase AAH2				sigDown
TGME49_201520	-2.3398	6.86022	-4.33723	0.000950379	0.00555975	-0.989488	protein phosphatase PPM3G, putative				sigDown
TGME49_313650	-2.33976	2.7572	-3.28631	0.00644551	0.0228941	-2.92234	hypothetical protein				sigDown
TGME49_201220	-2.33498	8.3317	-8.01704	3.51001e-06	0.000103034	4.75658	preconoidal ring protein PCR4				sigDown
TGME49_305050	-2.31652	9.47043	-5.20877	0.000213586	0.00187285	0.538481	essential light chain ELC2				sigDown
TGME49_329200	-2.31611	2.5264	-3.47669	0.00452759	0.0175934	-2.56923	hypothetical protein				sigDown
TGME49_213072	-2.29621	8.03544	-3.5178	0.00419615	0.01653	-2.49297	protein SLY1				sigDown
TGME49_263480	-2.28754	8.73825	-5.63612	0.000106706	0.0011228	1.25149	sodium/hydrogen exchanger 3 protein				sigDown
TGME49_319920	-2.28021	10.5462	-4.90502	0.000355233	0.00270295	0.0166048	2-oxo acid dehydrogenases acyltransferase (catalytic domain) domain-containing protein				sigDown
TGME49_205640	-2.26918	10.3927	-5.27713	0.000190816	0.00173404	0.654231	hypothetical protein				sigDown
TGME49_269430	-2.26186	6.9675	-3.65065	0.0032848	0.0137258	-2.24678	heptaprenyl diphosphate synthase COQ1				sigDown
TGME49_306380	-2.26063	9.6985	-6.75577	1.95394e-05	0.000344824	2.99702	U1 zinc finger protein				sigDown
TGME49_229310	-2.25719	7.75646	-3.78419	0.00257152	0.0115906	-1.99987	mediator complex subunit MED14				sigDown
TGME49_234230	-2.2571	8.35429	-3.78727	0.0025571	0.0115567	-1.99419	hypothetical protein				sigDown
TGME49_270150	-2.25589	7.83783	-8.7242	1.45356e-06	5.25051e-05	5.6551	hypothetical protein				sigDown
TGME49_229260	-2.25191	8.72278	-4.69489	0.000508807	0.00354436	-0.351339	basal complex component BCC4				sigDown
TGME49_230340	-2.23852	8.1577	-4.56412	0.000638191	0.0042005	-0.583026	apical annuli protein AAP4				sigDown
TGME49_209060	-2.23802	7.79794	-2.99727	0.0110434	0.0343465	-3.45628	thrombospondin type 1 domain-containing protein				sigDown
TGME49_278180	-2.22982	10.2831	-5.08477	0.000262478	0.00218594	0.326918	hypothetical protein				sigDown
TGME49_220930	-2.21509	9.52242	-7.37981	8.15468e-06	0.000187934	3.89388	IMC sutures component ISC3				sigDown
TGME49_244350	-2.20805	7.76761	-2.93459	0.0124122	0.0376633	-3.57133	DnaJ domain-containing protein				sigDown
TGME49_307470	-2.20605	1.18637	-3.62329	0.00345433	0.0142929	-2.29744	hypothetical protein				sigDown
TGME49_218070	-2.20487	8.89079	-4.41776	0.000824505	0.00506398	-0.844592	hypothetical protein				sigDown
TGME49_256910	-2.20379	10.664	-3.33551	0.00588228	0.0214039	-2.83112	vacuolar protein sorting-associated protein 31, putative				sigDown
TGME49_285490	-2.1991	7.20586	-5.60471	0.000112191	0.00115767	1.19996	helix-hairpin-helix motif domain-containing protein				sigDown
TGME49_257610	-2.19359	5.50452	-2.79401	0.0161261	0.0455691	-3.82786	hypothetical protein				sigDown
TGME49_201250	-2.19048	9.85162	-2.97644	0.0114807	0.0353937	-3.49455	histone lysine methyltransferase, SET, putative				sigDown
TGME49_253060	-2.18406	7.46063	-3.99898	0.00174039	0.00873691	-1.60472	WD domain, G-beta repeat-containing protein				sigDown
TGME49_266980	-2.18198	3.18088	-4.92348	0.000344294	0.00264369	0.0486629	hypothetical protein				sigDown
TGME49_305080	-2.18092	8.20353	-4.52353	0.000684983	0.00440692	-0.65532	hypothetical protein				sigDown
TGME49_271050	-2.18037	8.188	-2.79076	0.016224	0.0457648	-3.83377	SAG-related sequence SRS34A	SAG2	Tachyzoite	SAG2	sigDown
TGME49_229220	-2.17753	6.74606	-5.11464	0.000249717	0.00212074	0.37806	hypothetical protein				sigDown
TGME49_323110	-2.17414	4.45922	-3.77778	0.00260182	0.0116473	-2.0117	hypothetical protein				sigDown
TGME49_244950	-2.17252	1.10103	-3.63563	0.00337679	0.0140354	-2.27459	hypothetical protein				sigDown
TGME49_208830	-2.17181	4.53326	-3.10807	0.00898248	0.0291411	-3.25214	dense granule protein GRA16				sigDown
TGME49_310320	-2.16912	7.61907	-3.84924	0.00228373	0.0106552	-1.87991	calreticulin family protein				sigDown
TGME49_313580	-2.16754	7.09392	-6.66744	2.22019e-05	0.000372569	2.86576	cytochrome b5 family heme/steroid binding domain-containing protein				sigDown
TGME49_268220	-2.16713	8.49022	-3.17349	0.00795172	0.0266401	-3.13127	hypothetical protein				sigDown
TGME49_315715	-2.16538	2.71349	-5.08364	0.000262974	0.00218594	0.324982	hypothetical protein				sigDown
TGME49_224560	-2.16362	1.41553	-3.33812	0.0058539	0.0213296	-2.82629	hypothetical protein				sigDown
TGME49_233500	-2.16245	9.02054	-4.09774	0.00145667	0.00767392	-1.42408	triose-phosphate isomerase TPI-II				sigDown
TGME49_270975	-2.15512	8.07182	-3.8527	0.00226936	0.0106005	-1.87353	hypothetical protein				sigDown
TGME49_234060	-2.15351	8.17203	-2.7917	0.0161955	0.0457168	-3.83205	hypothetical protein				sigDown
TGME49_308840	-2.13924	9.51455	-3.32246	0.00602674	0.0218278	-2.85533	SAG-related sequence SRS51				sigDown
TGME49_264860	-2.13759	8.35483	-3.87573	0.00217621	0.0103161	-1.83112	zinc finger, C3HC4 type (RING finger) domain-containing protein				sigDown
TGME49_286060	-2.12731	7.29708	-6.19505	4.47508e-05	0.000619156	2.14512	tricarboxylate carrier protein				sigDown
TGME49_247700	-2.10984	8.85282	-4.65975	0.000540633	0.00368894	-0.413409	AP2 domain transcription factor AP2XII-4				sigDown
TGME49_261680	-2.10573	10.6769	-3.48831	0.00443133	0.0173118	-2.54768	hypothetical protein				sigDown
TGME49_255310	-2.10568	6.00493	-6.02312	5.81936e-05	0.000745793	1.87498	zinc finger (CCCH type) motif-containing protein				sigDown
TGME49_224080	-2.09767	8.73772	-2.78457	0.0164117	0.0462129	-3.845	Kazal-type serine protease inhibitor domain-containing protein				sigDown
TGME49_206520	-2.08907	1.28389	-4.32425	0.000972475	0.0056436	-1.01291	hypothetical protein				sigDown
TGME49_243200	-2.08766	9.69585	-4.00314	0.00172735	0.00870421	-1.59709	inner membrane complex protein IMC29				sigDown
TGME49_309910	-2.08651	8.87602	-3.21837	0.0073141	0.0251357	-3.04821	amino acid transporter, putative				sigDown
TGME49_283740	-2.08633	7.10208	-5.28639	0.000187932	0.00171172	0.669874	RNA recognition motif-containing protein				sigDown
TGME49_202800	-2.08347	7.90104	-3.84101	0.00231823	0.0107659	-1.89507	cytochrome c oxidase assembly protein COX11 protein, putative				sigDown
TGME49_277260	-2.08163	10.1109	-4.05977	0.00155961	0.00805176	-1.49342	hypothetical protein				sigDown
TGME49_297210	-2.08155	8.81001	-3.37163	0.00550076	0.0203467	-2.76413	E3 ubiquitin-protein ligase RBBP6, putative				sigDown
TGME49_207910	-2.07699	9.04286	-4.87017	0.000376887	0.00282471	-0.044032	calcium/proton exchanger CAX				sigDown
TGME49_318440	-2.06964	10.7224	-4.79771	0.00042646	0.00310036	-0.170613	helicase associated domain (ha2) protein				sigDown
TGME49_242600	-2.06815	5.50383	-5.2203	0.000209553	0.00184356	0.558053	6-phosphogluconate dehydrogenase				sigDown
TGME49_308000	-2.06541	9.14866	-7.68069	5.44431e-06	0.000141818	4.30772	Gpi16 subunit, GPI transamidase component protein				sigDown
TGME49_236270	-2.0628	7.70214	-3.05255	0.00996206	0.0315386	-3.35455	RING zinc finger protein				sigDown
TGME49_270090	-2.04064	8.24991	-4.59317	0.000606742	0.0040468	-0.531376	hypothetical protein				sigDown
TGME49_215560	-2.03474	8.05887	-5.71848	9.36246e-05	0.00102424	1.38596	histone arginine methyltransferase PRMT5				sigDown
TGME49_319720	-2.03264	7.27716	-3.38493	0.00536672	0.0200082	-2.73947	hypothetical protein				sigDown
TGME49_310100	-2.0285	6.78757	-4.2749	0.00106142	0.00603708	-1.10208	mannosyltransferase (pig-m) protein				sigDown
TGME49_203950	-2.02508	9.86382	-3.71001	0.00294559	0.0126781	-2.13694	Myb family DNA-binding domain-containing protein				sigDown
TGME49_240370	-2.0183	5.38424	-4.38658	0.00087105	0.00526293	-0.900614	Toxoplasma gondii family E protein				sigDown
TGME49_290660	-2.01452	11.7527	-10.7428	1.53631e-07	1.16432e-05	7.92026	RNA recognition motif-containing protein				sigDown
TGME49_248890	-2.01001	8.5127	-4.12487	0.00138743	0.00738208	-1.3746	actin-like protein ALP3b				sigDown
TGME49_224460	-2.00971	8.26795	-5.79138	8.34561e-05	0.000953426	1.50419	aminopeptidase N3				sigDown
TGME49_281520	-2.00391	9.73387	-6.53852	2.68021e-05	0.000426116	2.67222	zinc finger, C3HC4 type (RING finger) domain-containing protein				sigDown
TGME49_229280	-2.00095	8.41524	-3.79362	0.00252762	0.0114458	-1.98248	hypothetical protein				sigDown
TGME49_243450	-1.78306	8.7201	-10.5717	1.83317e-07	1.30891e-05	7.74381	Ras-related protein Rab2BV, putative				sigLowFC
TGME49_278600	1.96825	9.98551	10.3362	2.34694e-07	1.52589e-05	7.49653	hypothetical protein				sigLowFC
TGME49_227010	1.89718	8.17908	10.0026	3.35732e-07	1.98986e-05	7.13715	rhoptry kinase family protein ROP30				sigLowFC
TGME49_247540	1.51762	9.19295	10.0021	3.35914e-07	1.98986e-05	7.1366	ATP-binding cassette G family transporter ABCG107				sigLowFC
TGME49_305450	-1.74866	9.79294	-9.85254	3.9561e-07	2.21237e-05	6.97203	acetyltransferase, GNAT family protein				sigLowFC
TGME49_219270	-1.81596	12.2896	-9.81612	4.1181e-07	2.2712e-05	6.93161	glideosome-associated protein with multiple-membrane spans GAPM2A				sigLowFC
TGME49_254120	1.96208	11.9406	9.76658	4.35007e-07	2.35051e-05	6.8764	autophagy-related protein ATG8				sigLowFC
TGME49_252250	1.44625	8.59697	9.62679	5.08343e-07	2.58931e-05	6.71931	ATPase, AAA family protein				sigLowFC
TGME49_265260	1.58556	9.75073	9.03149	1.00739e-06	4.04827e-05	6.0274	hypothetical protein				sigLowFC
TGME49_217820	-1.9356	11.0769	-8.89523	1.18383e-06	4.5297e-05	5.86363	PCI domain-containing protein				sigLowFC
TGME49_232350	-1.92241	14.719	-8.80291	1.32204e-06	4.89463e-05	5.75148	lactate dehydrogenase LDH1				sigLowFC
TGME49_320470	1.8801	10.0792	8.74986	1.40921e-06	5.1933e-05	5.68659	hypothetical protein				sigLowFC
TGME49_318710	-1.44167	9.51658	-8.697	1.5022e-06	5.36297e-05	5.62163	ATP-binding cassette sub-family F member 1				sigLowFC
TGME49_283730	-1.50322	9.36855	-8.64057	1.60878e-06	5.64059e-05	5.55192	endomembrane protein 70 subfamily protein				sigLowFC
TGME49_310460	-1.27748	11.2598	-8.63888	1.61209e-06	5.64059e-05	5.54983	ras-related protein RAB6				sigLowFC
TGME49_265810	1.42838	8.31107	8.5846	1.72252e-06	5.93751e-05	5.48241	hypothetical protein				sigLowFC
TGME49_293730	-1.64732	9.85539	-8.54132	1.81638e-06	6.1811e-05	5.42841	palmitoyltransferase DHHC14				sigLowFC
TGME49_217665	1.56103	9.5128	8.51303	1.88067e-06	6.31921e-05	5.393	hypothetical protein				sigLowFC
TGME49_237150	-1.50119	11.9498	-8.51468	1.87685e-06	6.31921e-05	5.39507	minor histocompatibility antigen h13, putative				sigLowFC
TGME49_286130	1.50705	7.8051	8.32704	2.36895e-06	7.73432e-05	5.15783	guanylylate cyclase, putative				sigLowFC
TGME49_223110	1.71502	11.1858	8.29554	2.46433e-06	7.94647e-05	5.11758	glycolipid transfer protein GLTP				sigLowFC
TGME49_238000	1.87575	10.4859	8.25752	2.58491e-06	8.203e-05	5.06886	peptidyl-prolyl isomerase				sigLowFC
TGME49_272383	-1.42764	7.73962	-8.21925	2.7127e-06	8.40831e-05	5.01964	hypothetical protein				sigLowFC
TGME49_247850	1.84434	7.70507	8.15228	2.95288e-06	9.04757e-05	4.93307	28 kDa A-kinase anchor, putative				sigLowFC
TGME49_222970	1.94077	10.2374	8.07098	3.2754e-06	9.84714e-05	4.82724	inositol(myo)-1(or 4)-monophosphatase 2, putative				sigLowFC
TGME49_229350	-1.45994	9.21573	-8.07314	3.26634e-06	9.84714e-05	4.83007	HEAT repeat-containing protein				sigLowFC
TGME49_206390	1.79642	10.4475	8.04382	3.39134e-06	0.000101196	4.79171	checkpoint protein HUS1, putative				sigLowFC
TGME49_210230	1.40935	10.9289	8.01257	3.53023e-06	0.000103034	4.75071	pseudouridine synthase, putative				sigLowFC
TGME49_284660	1.82835	10.1126	8.00881	3.54734e-06	0.000103157	4.74577	mitochondrial ribosomal protein s6-2, putative				sigLowFC
TGME49_305820	1.94137	9.44657	7.98096	3.67694e-06	0.000106538	4.70911	SGS domain-containing protein				sigLowFC
TGME49_263270	1.3909	10.9135	7.96044	3.77563e-06	0.000107835	4.68204	glycerophosphodiester phosphodiesterase family protein				sigLowFC
TGME49_248840	-1.82759	8.16085	-7.93091	3.9227e-06	0.00011124	4.64299	transporter facilitator protein TFP4				sigLowFC
TGME49_232210	-1.41402	7.91235	-7.90101	4.07782e-06	0.000114825	4.60335	hypothetical protein				sigLowFC
TGME49_286690	1.3867	10.0091	7.89807	4.09345e-06	0.000114861	4.59944	DNA/RNA-binding protein KIN17 domain-containing protein				sigLowFC
TGME49_305460	1.3506	10.5681	7.83399	4.44991e-06	0.00012271	4.51407	methionine aminopeptidase 2, putative				sigLowFC
TGME49_270300	1.46678	9.20227	7.77982	4.7771e-06	0.000129588	4.4415	RING zinc finger protein				sigLowFC
TGME49_209120	-1.49779	8.15343	-7.74556	4.99729e-06	0.000133654	4.3954	PAT complex subunit Asterix, putative				sigLowFC
TGME49_293490	1.92145	9.95568	7.74537	4.99853e-06	0.000133654	4.39514	hypothetical protein				sigLowFC
TGME49_223420	1.62369	9.44714	7.73151	5.09067e-06	0.000135001	4.37646	DnaJ domain-containing protein				sigLowFC
TGME49_314550	1.34793	8.86013	7.72815	5.11325e-06	0.000135001	4.37193	hypothetical protein				sigLowFC
TGME49_258730	1.94227	10.254	7.68509	5.41274e-06	0.000141456	4.31368	hypothetical protein				sigLowFC
TGME49_244610	1.43272	8.7171	7.6356	5.78017e-06	0.00014911	4.24645	zinc finger, C3HC4 type (RING finger) domain-containing protein				sigLowFC
TGME49_222310	-1.48981	9.12125	-7.63302	5.79999e-06	0.00014914	4.24294	THH1 domain-containing protein				sigLowFC
TGME49_202820	-1.43986	9.97053	-7.62462	5.86523e-06	0.000150334	4.23149	ubiquitin-conjugating enzyme subfamily protein				sigLowFC
TGME49_205750	1.5541	9.74842	7.59404	6.10931e-06	0.000155099	4.18974	histone deacetylase complex subunit Sin3				sigLowFC
TGME49_268790	1.4974	8.94891	7.5737	6.27764e-06	0.000156669	4.16191	dense granule protein GRA58				sigLowFC
TGME49_500204	1.92334	7.87147	7.57472	6.26904e-06	0.000156669	4.16331	PIBF1 domain-containing protein				sigLowFC
TGME49_253730	-1.55648	9.22867	-7.53652	6.59822e-06	0.000161859	4.1109	importin-beta N-terminal domain-containing protein				sigLowFC
TGME49_286010	1.50338	9.66937	7.52882	6.66677e-06	0.000162543	4.10031	hypothetical protein				sigLowFC
TGME49_245590	1.4951	9.47795	7.51702	6.77335e-06	0.000163152	4.08406	rhomboid protease ROM6				sigLowFC
TGME49_242580	1.41111	9.88962	7.48441	7.07727e-06	0.000167943	4.0391	iron only hydrogenase large subunit, c-terminal domain-containing protein				sigLowFC
TGME49_291300	-1.75962	10.5147	-7.48696	7.05306e-06	0.000167943	4.04261	RER1 protein, putative				sigLowFC
TGME49_205470	-1.52749	12.669	-7.44159	7.49878e-06	0.000175344	3.97982	translation elongation factor 2 family protein, putative				sigLowFC
TGME49_293760	1.31688	9.14631	7.44573	7.45686e-06	0.000175344	3.98557	EF hand domain-containing protein				sigLowFC
TGME49_309220	-1.49408	10.7698	-7.41309	7.79403e-06	0.000180141	3.94024	GTPase activating protein for Arf protein				sigLowFC
TGME49_255510	-1.81973	9.72957	-7.35722	8.40951e-06	0.000193249	3.86234	ankyrin repeat-containing protein				sigLowFC
TGME49_235690	-1.54876	10.4088	-7.32303	8.81155e-06	0.000201331	3.81446	inner membrane complex protein IMC37				sigLowFC
TGME49_318580	1.8418	10.9735	7.31349	8.92735e-06	0.000202818	3.80107	phosphoglucomutase PGM2				sigLowFC
TGME49_234460	1.58028	8.05412	7.2933	9.1779e-06	0.000207332	3.77269	zinc finger Ran-binding domain-containing protein				sigLowFC
TGME49_290200	-1.56739	10.8624	-7.27573	9.40197e-06	0.000210021	3.74795	NAD/NADP octopine/nopaline dehydrogenase, alpha-helical domain-containing protein				sigLowFC
TGME49_263150	-1.40821	9.04971	-7.2691	9.48799e-06	0.000211352	3.73861	tetratricopeptide repeat-containing protein				sigLowFC
TGME49_269950	-1.87128	11.925	-7.26659	9.52085e-06	0.000211495	3.73507	dense granule protein GRA61				sigLowFC
TGME49_246990	1.75856	9.05728	7.24346	9.82881e-06	0.000214757	3.70242	hypothetical protein				sigLowFC
TGME49_271970	-1.18371	12.755	-7.24469	9.81216e-06	0.000214757	3.70416	glideosome-associated protein with multiple-membrane spans GAPM3				sigLowFC
TGME49_271600	1.46229	9.63072	7.20466	1.03696e-05	0.000222917	3.64748	hypothetical protein				sigLowFC
TGME49_240500	1.81281	10.3187	7.15009	1.11844e-05	0.000234755	3.56987	hypothetical protein				sigLowFC
TGME49_222400	-1.37553	10.995	-7.09964	1.19986e-05	0.00024867	3.49777	hypothetical protein				sigLowFC
TGME49_272695	1.86538	10.0191	7.0888	1.21816e-05	0.000251072	3.48223	hypothetical protein				sigLowFC
TGME49_204000	-1.20834	6.72873	-7.07223	1.24673e-05	0.00025465	3.45844	hypothetical protein				sigLowFC
TGME49_248980	1.50265	9.87071	7.07068	1.24943e-05	0.00025465	3.45622	NudC family protein				sigLowFC
TGME49_278510	1.17573	11.1445	7.06953	1.25144e-05	0.00025465	3.45457	protein phosphatase PPM3F				sigLowFC
TGME49_267670	1.80544	9.47999	7.06449	1.26031e-05	0.000255804	3.44732	hypothetical protein				sigLowFC
TGME49_306300	1.09385	6.65569	7.05835	1.2712e-05	0.000257361	3.43849	hypothetical protein				sigLowFC
TGME49_233100	-1.61661	10.2392	-6.99606	1.38748e-05	0.000278087	3.34864	SPFH domain / Band 7 family protein				sigLowFC
TGME49_258900	1.39912	8.67902	6.99056	1.39827e-05	0.000279549	3.34069	hypothetical protein				sigLowFC
TGME49_231180	-1.81761	7.82273	-6.97618	1.42693e-05	0.000282455	3.31985	hypothetical protein				sigLowFC
TGME49_263060	-1.33977	10.5572	-6.97043	1.43857e-05	0.000284055	3.31151	Proteasome/cyclosome repeat-containing protein				sigLowFC
TGME49_216910	1.70595	9.88025	6.96087	1.45813e-05	0.000287208	3.29765	hypothetical protein				sigLowFC
TGME49_267810	-1.49208	10.0101	-6.95801	1.46405e-05	0.000287666	3.29349	ras-related protein RAB5A				sigLowFC
TGME49_205200	1.8558	5.7326	6.95472	1.47087e-05	0.000288298	3.28871	hypothetical protein				sigLowFC
TGME49_271750	1.83213	8.84418	6.94083	1.50007e-05	0.000291875	3.26853	EF hand domain-containing protein				sigLowFC
TGME49_211890	1.69273	8.9228	6.92238	1.53983e-05	0.00029601	3.24167	RAP domain-containing protein				sigLowFC
TGME49_219820	1.99563	13.823	6.91826	1.54884e-05	0.000297029	3.23567	polyubiquitin UbC, putative				sigLowFC
TGME49_311760	1.23026	9.12298	6.90855	1.57035e-05	0.000299715	3.22151	hypothetical protein				sigLowFC
TGME49_202690	-1.42051	8.43724	-6.90392	1.58072e-05	0.000299918	3.21475	DNA-directed RNA polymerase II RPB9				sigLowFC
TGME49_207150	1.51918	9.06066	6.90447	1.57949e-05	0.000299918	3.21555	SAG-related sequence SRS49C				sigLowFC
TGME49_231210	-1.09813	10.1565	-6.89807	1.59391e-05	0.000299918	3.20622	sarcalumenin/eps15 family protein				sigLowFC
TGME49_283790	-1.75666	5.85836	-6.89616	1.59825e-05	0.000300029	3.20342	protein kinase, putative				sigLowFC
TGME49_219150	1.69625	9.56263	6.87951	1.63657e-05	0.000306502	3.1791	zinc finger, zz type domain-containing protein				sigLowFC
TGME49_215380	1.76465	9.96531	6.8777	1.6408e-05	0.000306576	3.17644	hypothetical protein				sigLowFC
TGME49_246540	-1.55279	9.22957	-6.87152	1.65532e-05	0.000308568	3.16739	cytochrome c1, heme protein				sigLowFC
TGME49_500331	1.97602	9.55964	6.86128	1.67966e-05	0.000311653	3.1524	hypothetical protein, conserved				sigLowFC
TGME49_278160	1.27523	10.2925	6.85506	1.69464e-05	0.000313704	3.14328	vesicle transport v-snare protein				sigLowFC
TGME49_221620	-1.66473	12.6653	-6.84941	1.70837e-05	0.000315516	3.13499	beta-tubulin, putative				sigLowFC
TGME49_294800	-1.18043	13.5225	-6.83915	1.73359e-05	0.000318701	3.11994	elongation factor 1-alpha (EF-1-ALPHA), putative				sigLowFC
TGME49_215940	-1.42439	9.3394	-6.83048	1.75522e-05	0.000321201	3.10721	acetyl-CoA transporter AT1				sigLowFC
TGME49_500184	1.80795	6.60711	6.8281	1.76122e-05	0.000321422	3.1037	Toxoplasma gondii family C protein				sigLowFC
TGME49_304500	1.82424	10.4505	6.81347	1.7985e-05	0.000324665	3.08218	hypothetical protein				sigLowFC
TGME49_288550	1.59025	10.0536	6.80427	1.82237e-05	0.000328232	3.06864	ankyrin repeat-containing protein				sigLowFC
TGME49_219700	-1.45363	9.70601	-6.77154	1.91009e-05	0.000341352	3.02034	DNA replication licensing factor MCM4, putative				sigLowFC
TGME49_235440	1.69708	8.88165	6.76919	1.91656e-05	0.000341352	3.01687	LSM domain-containing protein				sigLowFC
TGME49_264110	1.95527	8.6343	6.76323	1.93305e-05	0.000342853	3.00807	hypothetical protein				sigLowFC
TGME49_254770	1.5879	11.0929	6.74213	1.99273e-05	0.000347945	2.97682	shewanella-like protein phosphatase SLP				sigLowFC
TGME49_308050	-1.25105	10.3873	-6.73636	2.00939e-05	0.000350089	2.96827	thioredoxin domain-containing protein				sigLowFC
TGME49_213680	1.46243	9.70738	6.70735	2.09541e-05	0.000363492	2.9252	MmgE/PrpD family protein				sigLowFC
TGME49_239260	1.8442	9.61746	6.69734	2.12597e-05	0.000365206	2.91032	histone H4				sigLowFC
TGME49_265780	-1.77679	6.9443	-6.69883	2.12139e-05	0.000365206	2.91254	flagellar/basal body protein				sigLowFC
TGME49_264050	1.35555	8.85763	6.6893	2.15087e-05	0.00036832	2.89835	fused toes protein homolog FTS				sigLowFC
TGME49_295460	1.85841	10.3043	6.68324	2.16988e-05	0.000369587	2.88931	Got1 family protein				sigLowFC
TGME49_230220	-1.20072	9.306	-6.67027	2.21107e-05	0.000372569	2.86999	vacuolar protein sorting-associated protein 11				sigLowFC
TGME49_224140	1.98832	6.57675	6.65499	2.26072e-05	0.000378027	2.84717	hypothetical protein				sigLowFC
TGME49_225745	1.71143	8.64229	6.64456	2.29528e-05	0.000382403	2.83157	hypothetical protein				sigLowFC
TGME49_211690	-1.96439	10.1641	-6.63637	2.3228e-05	0.000384292	2.81933	AAA family protein				sigLowFC
TGME49_260490	1.50591	8.57448	6.61996	2.37901e-05	0.000390656	2.79475	hypothetical protein				sigLowFC
TGME49_263280	1.31469	10.1574	6.59669	2.46122e-05	0.000403328	2.75983	hypothetical protein				sigLowFC
TGME49_285760	-1.18714	8.23215	-6.58433	2.50609e-05	0.000409841	2.74126	U-snRNP-associated cyclophilin family protein				sigLowFC
TGME49_266675	1.67903	3.97186	6.57954	2.52375e-05	0.000411047	2.73405	hypothetical protein				sigLowFC
TGME49_246120	1.35947	8.84295	6.57748	2.53135e-05	0.00041113	2.73096	tetratricopeptide repeat-containing protein				sigLowFC
TGME49_251550	1.79971	11.2944	6.57103	2.5554e-05	0.000413674	2.72124	acyl-CoA binding protein ACBP1				sigLowFC
TGME49_247780	1.27655	10.3034	6.56729	2.56945e-05	0.000415108	2.7156	hypothetical protein				sigLowFC
TGME49_297120	-1.74485	9.81247	-6.55648	2.61048e-05	0.00041981	2.69932	inner membrane complex protein IMC44				sigLowFC
TGME49_237140	-1.02708	9.00297	-6.53987	2.67492e-05	0.000426116	2.67425	pyridoxal 5'-phosphate synthase subunit PDX1				sigLowFC
TGME49_248850	-1.57053	7.34898	-6.53432	2.69682e-05	0.000426682	2.66587	methionine aminopeptidase 1b				sigLowFC
TGME49_289610	1.67483	10.6199	6.53509	2.69375e-05	0.000426682	2.66704	hypothetical protein				sigLowFC
TGME49_318340	1.86589	9.39325	6.5143	2.77743e-05	0.000437226	2.63559	hypothetical protein				sigLowFC
TGME49_207060	-1.37683	12.2688	-6.50745	2.8056e-05	0.000440793	2.62522	ribonucleoside-diphosphate reductase small subunit				sigLowFC
TGME49_256760	1.30582	13.6761	6.50253	2.826e-05	0.000443128	2.61777	pyruvate kinase PyK1				sigLowFC
TGME49_205680	1.87251	8.47483	6.49996	2.83672e-05	0.000443938	2.61388	hypothetical protein				sigLowFC
TGME49_205060	1.96862	7.88336	6.49319	2.86519e-05	0.000446645	2.60361	hypothetical protein				sigLowFC
TGME49_238260	1.6866	8.86353	6.49051	2.87654e-05	0.000447542	2.59955	hypothetical protein				sigLowFC
TGME49_288580	1.59873	7.9418	6.48312	2.90811e-05	0.000451577	2.58833	RNA methylase, putative				sigLowFC
TGME49_294780	1.16764	9.48756	6.47562	2.94049e-05	0.000454182	2.57694	hypothetical protein				sigLowFC
TGME49_320040	1.72642	8.89886	6.47529	2.94193e-05	0.000454182	2.57644	CHORD protein				sigLowFC
TGME49_246510	-1.30264	10.7717	-6.45701	3.02256e-05	0.000463943	2.54864	protein phosphatase 2a regulatory b subunit (b56 family) protein				sigLowFC
TGME49_261750	1.29186	10.5446	6.44676	3.06878e-05	0.000470134	2.53304	rhoptry neck protein RON10				sigLowFC
TGME49_225300	1.54347	8.8389	6.42871	3.15205e-05	0.000479768	2.50551	hypothetical protein				sigLowFC
TGME49_321660	1.40956	9.35064	6.40717	3.25452e-05	0.000492923	2.47262	mannosyltransferase, putative				sigLowFC
TGME49_265040	1.52481	10.0975	6.4058	3.26113e-05	0.000492992	2.47053	EGF-like domain				sigLowFC
TGME49_226500	1.76725	11.3869	6.40081	3.28544e-05	0.00049573	2.4629	succinate dehydrogenase subunit SDH11				sigLowFC
TGME49_289690	1.81278	14.9342	6.39839	3.2973e-05	0.000496582	2.45919	glyceraldehyde-3-phosphate dehydrogenase GAPDH1				sigLowFC
TGME49_254660	1.62561	10.3976	6.39479	3.31503e-05	0.000498314	2.45368	ankyrin repeat-containing protein				sigLowFC
TGME49_209490	1.87683	9.4777	6.37466	3.41598e-05	0.000510609	2.42284	hypothetical protein				sigLowFC
TGME49_207750	1.77119	9.14047	6.36855	3.44722e-05	0.00051336	2.41347	glycosyltransferase family 17 protein				sigLowFC
TGME49_266690	1.19163	11.2888	6.36397	3.47089e-05	0.000515924	2.40644	hypothetical protein				sigLowFC
TGME49_204550	1.07094	10.1022	6.36038	3.48953e-05	0.000517732	2.40093	hypothetical protein				sigLowFC
TGME49_215210	1.77195	8.93963	6.34872	3.55085e-05	0.000524882	2.38302	F-box domain-containing protein				sigLowFC
TGME49_209950	-1.28432	11.88	-6.34247	3.58422e-05	0.000527864	2.3734	thioredoxin, putative				sigLowFC
TGME49_301430	1.25993	9.25128	6.33369	3.63159e-05	0.000532119	2.3599	septum formation protein maf, putative				sigLowFC
TGME49_309090	-1.81107	7.66974	-6.3336	3.63209e-05	0.000532119	2.35976	hypothetical protein				sigLowFC
TGME49_260480	1.67294	8.58889	6.33214	3.64002e-05	0.000532162	2.35751	leucine rich repeat-containing protein				sigLowFC
TGME49_269180	-1.54101	11.0976	-6.31833	3.71614e-05	0.00054174	2.33624	MIF4G domain-containing protein				sigLowFC
TGME49_306280	1.77684	9.53133	6.31511	3.7341e-05	0.000542937	2.33128	mediator complex subunit MED7				sigLowFC
TGME49_259690	1.74758	8.95035	6.31022	3.76158e-05	0.000545941	2.32374	orotidine-5-phosphate decarboxylase/orotate phosphoribosyltransferase				sigLowFC
TGME49_293258	1.96632	8.45337	6.30155	3.81085e-05	0.000552073	2.31035	hypothetical protein				sigLowFC
TGME49_226830	-1.38761	11.2423	-6.29683	3.83794e-05	0.000554007	2.30307	DnaK family protein				sigLowFC
TGME49_262490	-1.24973	9.66197	-6.29415	3.85342e-05	0.00055524	2.29893	serine hydrolase ASH4				sigLowFC
TGME49_202460	-1.29154	9.1745	-6.29047	3.87484e-05	0.000557322	2.29323	diacylglycerol kinase accessory domain (presumed) domain-containing protein				sigLowFC
TGME49_254340	1.55602	8.06283	6.26307	4.0379e-05	0.000577352	2.25084	SAYSvFN domain-containing protein				sigLowFC
TGME49_321690	-1.35125	10.3842	-6.26224	4.04298e-05	0.000577352	2.24955	hypothetical protein				sigLowFC
TGME49_207800	1.62795	9.19485	6.25986	4.05747e-05	0.000578388	2.24587	hypothetical protein				sigLowFC
TGME49_270010	-1.43097	8.51578	-6.25865	4.06488e-05	0.000578413	2.24399	hypothetical protein				sigLowFC
TGME49_236070	1.58853	10.0977	6.25433	4.09142e-05	0.000581156	2.2373	pyrroline-5-carboxylate reductase				sigLowFC
TGME49_500036	1.4903	8.64658	6.24905	4.12415e-05	0.000584767	2.22911	RNA binding protein, putative				sigLowFC
TGME49_232340	-1.39997	10.4149	-6.236	4.20619e-05	0.000594291	2.20885	protein phosphatase PPM2A				sigLowFC
TGME49_288050	1.48277	7.02899	6.22067	4.30476e-05	0.000602892	2.18503	intraflagellar transport protein 172, putative				sigLowFC
TGME49_297180	-1.98994	9.10212	-6.22353	4.28618e-05	0.000602892	2.18948	CRAL-TRIO domain-containing protein				sigLowFC
TGME49_201700	-1.71509	9.13282	-6.21687	4.32962e-05	0.000605314	2.17911	protein transport protein SEC13				sigLowFC
TGME49_234510	1.65615	10.7234	6.21378	4.34989e-05	0.000606998	2.1743	acyl-CoA binding protein ACBP2				sigLowFC
TGME49_285220	1.54217	9.02114	6.20833	4.38592e-05	0.000608927	2.16582	CAP-Gly domain-containing protein				sigLowFC
TGME49_258880	1.94837	8.2141	6.19231	4.49366e-05	0.000620653	2.14086	axonemal dynein light chain p33, putative				sigLowFC
TGME49_232650	1.58994	8.48697	6.18711	4.52926e-05	0.000624491	2.13275	EELM2 domain-containing protein				sigLowFC
TGME49_238950	-1.5311	11.7368	-6.18163	4.56709e-05	0.00062586	2.12419	stearoyl-CoA desaturase				sigLowFC
TGME49_294640	-1.49215	12.5106	-6.18343	4.55461e-05	0.00062586	2.12701	ribonucleoside-diphosphate reductase large chain				sigLowFC
TGME49_235860	1.815	10.7565	6.17824	4.59062e-05	0.000626471	2.11891	subtilisin SUB11				sigLowFC
TGME49_212840	1.43504	9.17818	6.15958	4.72268e-05	0.000643394	2.08974	HIT zinc finger protein				sigLowFC
TGME49_227830	-1.8987	9.21288	-6.15572	4.75048e-05	0.000644547	2.0837	mitochondrial inner membrane translocase TIM44, putative				sigLowFC
TGME49_278700	1.44215	9.10108	6.15591	4.74912e-05	0.000644547	2.084	hypothetical protein				sigLowFC
TGME49_288270	1.41191	8.86408	6.15283	4.77144e-05	0.000644547	2.07918	DUF4602 domain-containing protein				sigLowFC
TGME49_318410	-1.14618	10.8347	-6.15313	4.76925e-05	0.000644547	2.07965	TCP-1 chaperonin, putative				sigLowFC
TGME49_500006	1.89583	6.82237	6.1447	4.83084e-05	0.000649282	2.06645	hypothetical protein, conserved				sigLowFC
TGME49_226520	1.74905	8.78725	6.13638	4.89245e-05	0.000656459	2.05342	LSM domain-containing protein				sigLowFC
TGME49_294898	-1.30511	9.07792	-6.11939	5.02087e-05	0.000671437	2.02677	tetratricopeptide repeat-containing protein				sigLowFC
TGME49_213910	-1.86634	9.17148	-6.06761	5.43481e-05	0.000717198	1.94529	hypothetical protein				sigLowFC
TGME49_208740	1.6668	5.42269	6.06492	5.45724e-05	0.000717772	1.94106	microneme adhesive repeat protein MCP3	MCP3	Bradyzoite	MCP3	sigLowFC
TGME49_274090	1.74386	7.33366	6.06559	5.45169e-05	0.000717772	1.94211	TIM10 family protein, putative				sigLowFC
TGME49_307020	1.74008	8.31446	6.06127	5.48791e-05	0.000719188	1.9353	hypothetical protein				sigLowFC
TGME49_236210	-1.29948	10.9384	-6.05548	5.5369e-05	0.000723506	1.92615	cytochrome b-c1 complex subunit 1				sigLowFC
TGME49_293720	1.60805	9.08456	6.04689	5.61041e-05	0.000727171	1.91259	HAD-like superfamily				sigLowFC
TGME49_230210	-1.57577	11.6496	-6.04165	5.65583e-05	0.000731872	1.9043	alveolin domain containing intermediate filament IMC10				sigLowFC
TGME49_276130	-1.9387	8.77384	-6.03983	5.67163e-05	0.000732731	1.90143	cathepsin CPC2				sigLowFC
TGME49_265870	-1.44438	8.85447	-6.02584	5.79502e-05	0.000745061	1.87929	pantoate-beta-alanine ligase				sigLowFC
TGME49_315310	1.33012	10.7686	6.0238	5.81327e-05	0.000745793	1.87606	hypothetical protein				sigLowFC
TGME49_287220	1.65514	7.53751	6.02112	5.83731e-05	0.000746896	1.87181	hypothetical protein				sigLowFC
TGME49_202810	-1.53677	8.95959	-6.0145	5.89709e-05	0.000752138	1.86133	mitochondrial import inner membrane translocase subunit TIM14				sigLowFC
TGME49_289010	1.61623	9.24568	5.99476	6.07944e-05	0.000771703	1.83001	RNA recognition motif-containing protein				sigLowFC
TGME49_262560	1.18517	11.5847	5.98955	6.12852e-05	0.0007767	1.82174	hypothetical protein				sigLowFC
TGME49_250030	1.32649	9.61036	5.9843	6.17844e-05	0.00078027	1.8134	hypothetical protein				sigLowFC
TGME49_289310	-0.966096	9.15817	-5.97899	6.22929e-05	0.000783601	1.80497	cullin family protein				sigLowFC
TGME49_204510	-1.89868	9.57335	-5.97761	6.24261e-05	0.000783707	1.80278	WD domain, G-beta repeat-containing protein				sigLowFC
TGME49_247300	-1.81847	9.64151	-5.9721	6.29609e-05	0.000785865	1.794	hypothetical protein				sigLowFC
TGME49_288320	1.97642	8.64002	5.97179	6.2991e-05	0.000785865	1.79351	adenylate kinase				sigLowFC
TGME49_214330	1.85695	9.46321	5.96616	6.35413e-05	0.000787701	1.78456	DnaJ domain-containing protein				sigLowFC
TGME49_235370	-1.8769	11.3641	-5.96775	6.33851e-05	0.000787701	1.78709	protein kinase, putative				sigLowFC
TGME49_261950	-1.53431	10.9692	-5.96251	6.39013e-05	0.000789136	1.77875	ATP synthase beta subunit ATP-B				sigLowFC
TGME49_267460	1.86038	7.73837	5.95038	6.5114e-05	0.000801103	1.75942	AP2 domain transcription factor AP2IX-1				sigLowFC
TGME49_232260	-1.05218	8.47938	-5.94852	6.53017e-05	0.000802177	1.75646	transverse sutures component TSC5				sigLowFC
TGME49_300070	-1.51331	5.97943	-5.94608	6.55488e-05	0.000802747	1.75257	hypothetical protein				sigLowFC
TGME49_320570	-1.31873	10.738	-5.94645	6.55116e-05	0.000802747	1.75316	elongation factor Tu, putative				sigLowFC
TGME49_243600	1.38032	13.0316	5.94183	6.59825e-05	0.000806823	1.74579	acetyltransferase, GNAT family protein				sigLowFC
TGME49_500049	1.41922	10.2168	5.93715	6.64629e-05	0.000808987	1.73833	hypothetical protein, conserved				sigLowFC
TGME49_257720	1.86333	10.38	5.9288	6.73301e-05	0.000817054	1.725	proton ATPase, putative				sigLowFC
TGME49_206540	-1.5054	7.83696	-5.91273	6.90325e-05	0.000833917	1.69932	hypothetical protein				sigLowFC
TGME49_289320	-1.47521	10.8299	-5.91108	6.92105e-05	0.000834273	1.69667	casein kinase I, putative				sigLowFC
TGME49_292610	1.69409	9.51626	5.91052	6.92707e-05	0.000834273	1.69578	Toxoplasma gondii family C protein				sigLowFC
TGME49_251500	-1.1598	10.3375	-5.9069	6.96615e-05	0.000837719	1.68999	eukaryotic initiation factor-3, subunit 3, putative				sigLowFC
TGME49_240590	1.7966	10.8845	5.89494	7.09707e-05	0.000852181	1.67084	DNA-directed RNA polymerase II RPB5				sigLowFC
TGME49_212200	1.61266	7.95638	5.88475	7.21064e-05	0.000863225	1.65452	hypothetical protein				sigLowFC
TGME49_253950	1.46105	9.25257	5.87834	7.28307e-05	0.000869294	1.64424	protein fam50a, putative				sigLowFC
TGME49_318560	0.980817	9.93867	5.87525	7.3183e-05	0.000870899	1.63927	ATPase/histidine kinase/DNA gyrase B/HSP90 domain-containing protein				sigLowFC
TGME49_283710	-1.52012	9.80481	-5.869	7.39008e-05	0.000876832	1.62924	ceramide synthase CERS1, putative				sigLowFC
TGME49_286210	-1.10445	9.44049	-5.86911	7.38878e-05	0.000876832	1.62942	protein phosphatase 4, catalytic subunit				sigLowFC
TGME49_229650	-1.31165	9.42056	-5.86332	7.45589e-05	0.000883156	1.62012	josephin protein				sigLowFC
TGME49_231630	-1.83187	10.0759	-5.8625	7.46547e-05	0.000883156	1.6188	alveolin domain containing intermediate filament IMC4				sigLowFC
TGME49_223940	-1.5794	11.9149	-5.85834	7.5141e-05	0.000887596	1.61212	gliding-associated protein GAP45				sigLowFC
TGME49_314400	-1.17134	11.7707	-5.85652	7.53549e-05	0.00088881	1.6092	pyruvate dehydrogenase E1 component, beta subunit, putative				sigLowFC
TGME49_274190	-1.40879	8.15644	-5.85535	7.54925e-05	0.000889121	1.60732	eukaryotic initiation factor 2B epsilon subunit, putative				sigLowFC
TGME49_315950	-1.84168	10.0869	-5.85121	7.59837e-05	0.000892278	1.60065	cytoskeleton salvaging RING family member 1				sigLowFC
TGME49_228290	-1.8905	9.30149	-5.84014	7.73102e-05	0.000906524	1.58285	serine hydrolase ASH1				sigLowFC
TGME49_223668	1.95164	8.7798	5.83891	7.74597e-05	0.000906947	1.58087	LYAR-type C2HC zinc finger protein				sigLowFC
TGME49_209250	-1.46351	10.2432	-5.83703	7.76873e-05	0.000906957	1.57785	hypothetical protein				sigLowFC
TGME49_253570	1.02056	9.18174	5.82575	7.90729e-05	0.000920512	1.55967	hypothetical protein				sigLowFC
TGME49_266470	1.30786	9.96351	5.8257	7.90786e-05	0.000920512	1.55959	hypothetical protein				sigLowFC
TGME49_320720	1.65814	8.77914	5.82003	7.97846e-05	0.00092738	1.55045	hypothetical protein				sigLowFC
TGME49_229150	-1.82576	8.61215	-5.81422	8.05147e-05	0.000931803	1.54109	transporter, major facilitator family protein				sigLowFC
TGME49_249170	-1.14399	8.80152	-5.81501	8.04158e-05	0.000931803	1.54235	Ras family protein				sigLowFC
TGME49_286190	-1.46536	8.08301	-5.81134	8.08797e-05	0.000934646	1.53644	hypothetical protein				sigLowFC
TGME49_291800	-1.07313	9.64417	-5.81044	8.09941e-05	0.000934646	1.53498	ADP-ribosylation factor-like protein ArlX2				sigLowFC
TGME49_218960	-1.64261	10.2001	-5.80908	8.11677e-05	0.0009353	1.53278	AP2 domain transcription factor AP2XII-1				sigLowFC
TGME49_286510	1.4601	9.14005	5.80614	8.15425e-05	0.000938266	1.52804	hypothetical protein				sigLowFC
TGME49_262650	-1.87857	7.61211	-5.79463	8.30309e-05	0.000951287	1.50944	WD domain, G-beta repeat-containing protein				sigLowFC
TGME49_289330	-1.74307	10.5452	-5.7955	8.2917e-05	0.000951287	1.51085	ubiquitin carboxyl-terminal hydrolase family 2 protein				sigLowFC
TGME49_272730	1.8687	8.85497	5.79206	8.33664e-05	0.000953426	1.50529	hypothetical protein				sigLowFC
TGME49_247220	1.43388	10.0209	5.76591	8.68685e-05	0.000983	1.46298	nudix -type motif 9 isoform a family protein				sigLowFC
TGME49_251800	1.86483	9.72783	5.76206	8.73969e-05	0.000983	1.45674	hypothetical protein				sigLowFC
TGME49_254520	-0.803157	10.1737	-5.76707	8.67097e-05	0.000983	1.46486	mediator complex subunit MED11				sigLowFC
TGME49_315670	-1.82006	9.33699	-5.76348	8.72026e-05	0.000983	1.45903	serine/threonine-protein phosphatase PP2A subunit A				sigLowFC
TGME49_239087	1.58194	9.90212	5.75833	8.79135e-05	0.000987422	1.45068	hypothetical protein				sigLowFC
TGME49_226580	1.58302	9.98479	5.75523	8.83439e-05	0.000990023	1.44566	hypothetical protein				sigLowFC
TGME49_203400	-1.05812	9.30662	-5.75256	8.87166e-05	0.000991726	1.44133	hypothetical protein				sigLowFC
TGME49_260630	-1.17172	10.0487	-5.75119	8.89086e-05	0.000991726	1.43911	DnaJ family Sec63 protein				sigLowFC
TGME49_233695	-1.82629	9.30586	-5.74484	8.98046e-05	0.000994691	1.4288	hypothetical protein				sigLowFC
TGME49_263310	1.63677	9.35908	5.73822	9.07469e-05	0.00100374	1.41807	step ii splicing factor, putative				sigLowFC
TGME49_203820	1.26814	9.50067	5.73619	9.10388e-05	0.00100558	1.41476	hypothetical protein				sigLowFC
TGME49_232760	1.59114	9.30165	5.7303	9.189e-05	0.00101358	1.40519	protein phosphatase inhibitor IPP2				sigLowFC
TGME49_221630	1.51158	8.76234	5.72918	9.20536e-05	0.00101398	1.40336	IMC-associated protein IAP4				sigLowFC
TGME49_203810	1.12228	11.9278	5.72506	9.26552e-05	0.00101641	1.39667	kelch repeat-containing protein				sigLowFC
TGME49_259660	1.70524	11.4869	5.72378	9.28425e-05	0.00101707	1.39459	orotate phosphoribosyltransferase				sigLowFC
TGME49_260370	1.45099	11.4264	5.71292	9.4451e-05	0.00103186	1.37693	PH-containing protein PH1				sigLowFC
TGME49_312622	-1.64091	8.28705	-5.70454	9.57127e-05	0.0010437	1.36328	DUF803 domain-containing protein				sigLowFC
TGME49_232750	1.2966	9.88706	5.69871	9.6601e-05	0.00104962	1.35378	23S rRNA (adenine(1618)-N(6))-methyltransferase, putative				sigLowFC
TGME49_243980	1.70361	8.84301	5.69543	9.71052e-05	0.00105224	1.34843	hypothetical protein				sigLowFC
TGME49_293680	1.2352	8.94914	5.69117	9.77629e-05	0.00105793	1.34149	hypothetical protein				sigLowFC
TGME49_247740	1.47279	7.49901	5.68867	9.81518e-05	0.00106023	1.33741	methyltransferase, putative				sigLowFC
TGME49_269480	-1.3057	9.41481	-5.68531	9.86766e-05	0.0010635	1.33193	AP-4 complex subunit beta, putative				sigLowFC
TGME49_222800	-1.0799	10.2709	-5.6812	9.93221e-05	0.00106902	1.32522	glycogen synthase, putative				sigLowFC
TGME49_258380	1.48846	9.73469	5.67324	0.000100586	0.00107683	1.31222	elongation factor P				sigLowFC
TGME49_225555	1.6281	12.2952	5.67139	0.000100882	0.00107802	1.3092	hypothetical protein				sigLowFC
TGME49_215150	-1.88727	11.3129	-5.66377	0.000102111	0.00108588	1.29676	AP2 domain transcription factor AP2X-9				sigLowFC
TGME49_260825	1.70956	7.74921	5.65897	0.000102893	0.00109274	1.28891	hypothetical protein				sigLowFC
TGME49_271810	-0.920198	11.738	-5.65299	0.000103876	0.00109881	1.27913	lanp, putative				sigLowFC
TGME49_282130	1.54471	8.31654	5.65056	0.00010428	0.00110162	1.27514	hypothetical protein				sigLowFC
TGME49_273640	1.45859	8.98808	5.64662	0.000104936	0.00110709	1.26869	hypothetical protein				sigLowFC
TGME49_278720	1.31905	9.50427	5.64412	0.000105354	0.00111004	1.2646	hypothetical protein				sigLowFC
TGME49_223960	-0.969789	10.338	-5.63208	0.000107395	0.00112708	1.24488	ubiquitin interaction motif family protein				sigLowFC
TGME49_234550	1.28521	11.9002	5.63216	0.000107381	0.00112708	1.24501	ribosomal protein RPL29				sigLowFC
TGME49_261710	1.15165	10.2669	5.62639	0.000108374	0.00113293	1.23555	ankyrin repeat-containing protein				sigLowFC
TGME49_279340	1.63565	9.13293	5.62638	0.000108377	0.00113293	1.23552	VMA21-like domain containing protein				sigLowFC
TGME49_288680	1.59142	10.3481	5.62787	0.000108119	0.00113293	1.23797	endonuclease IV APN				sigLowFC
TGME49_258770	-1.88895	9.62214	-5.62525	0.000108572	0.00113348	1.23368	polypeptide n-acetylgalactosaminyltransferase 12, putative				sigLowFC
TGME49_260170	-1.22194	8.11688	-5.61762	0.000109901	0.00114587	1.22116	elongation factor EF-G, putative				sigLowFC
TGME49_230650	0.977824	9.08908	5.61348	0.000110631	0.00115197	1.21436	DUF2362 domain-containing protein				sigLowFC
TGME49_252320	1.379	8.85632	5.61022	0.000111208	0.00115199	1.20901	Sas10/Utp3/C1D family protein				sigLowFC
TGME49_269980	-1.36098	11.1314	-5.61079	0.000111107	0.00115199	1.20995	preprotein translocase Sec61, putative				sigLowFC
TGME49_219860	-1.21755	9.74215	-5.60314	0.000112474	0.00115805	1.19738	DNA replication licensing factor MCM6, putative				sigLowFC
TGME49_225580	1.37121	9.0848	5.59753	0.000113486	0.00116502	1.18816	proteasome (prosome, macropain) 26S subunit, non-ATPase, 9, putative				sigLowFC
TGME49_243920	-1.79228	10.9553	-5.58697	0.00011542	0.00118033	1.17079	DNA replication licensing factor MCM5, putative				sigLowFC
TGME49_227020	1.65618	10.9054	5.58508	0.00011577	0.00118239	1.16769	histone deacetylase SIR2				sigLowFC
TGME49_273800	-1.56907	8.04891	-5.57939	0.00011683	0.00119017	1.15832	WD domain, G-beta repeat-containing protein				sigLowFC
TGME49_262960	1.83813	8.59537	5.56533	0.000119493	0.00121267	1.13515	U1 snRNP-associated protein Usp106, putative				sigLowFC
TGME49_251630	-1.70707	10.4345	-5.56002	0.000120515	0.00121994	1.1264	zinc transporter ZNT				sigLowFC
TGME49_309210	1.34103	12.6232	5.55787	0.000120932	0.00122262	1.12284	peroxiredoxin 6, putative				sigLowFC
TGME49_226985	1.53165	7.4861	5.54037	0.000124378	0.00124956	1.09396	hypothetical protein				sigLowFC
TGME49_274060	1.29244	11.9059	5.53936	0.00012458	0.00125002	1.09229	2-oxoglutarate/malate translocase OMT				sigLowFC
TGME49_213392	-1.43249	9.79033	-5.53808	0.000124837	0.00125103	1.09018	surface antigen repeat-containing protein				sigLowFC
TGME49_231460	1.30067	8.82875	5.53587	0.000125282	0.00125391	1.08652	hypothetical protein				sigLowFC
TGME49_297850	1.58405	9.06468	5.53248	0.000125966	0.00125918	1.08093	Branched-chain-amino-acid aminotransferase				sigLowFC
TGME49_316300	1.03881	9.74927	5.52834	0.000126808	0.00126548	1.07407	ATP-dependent DNA helicase, RecQ family protein				sigLowFC
TGME49_209160	-1.14784	10.3277	-5.52442	0.000127611	0.00126928	1.06759	myristoyl CoA:protein N-myristoyltransferase				sigLowFC
TGME49_224190	-1.57142	9.37052	-5.52471	0.00012755	0.00126928	1.06808	cation-transporting atpase family protein				sigLowFC
TGME49_311780	1.16313	9.96374	5.51831	0.000128873	0.00128024	1.05747	Zn-containing alcohol dehydrogenase				sigLowFC
TGME49_255420	1.57293	10.2606	5.51274	0.000130034	0.00129018	1.04825	inner membrane complex protein IMC39				sigLowFC
TGME49_321300	0.946611	9.05723	5.48554	0.000135867	0.00134471	1.00316	autophagy-related protein ATG12				sigLowFC
TGME49_201110	1.49282	8.04439	5.48065	0.000136944	0.0013537	0.995041	hypothetical protein				sigLowFC
TGME49_248370	1.65126	10.8501	5.47672	0.000137817	0.00135896	0.988515	prefoldin subunit 6, putative				sigLowFC
TGME49_253690	-1.84372	8.65882	-5.4673	0.000139932	0.00137474	0.972861	hypothetical protein				sigLowFC
TGME49_282140	1.14319	11.677	5.46572	0.000140288	0.00137655	0.970246	cwf21 protein				sigLowFC
TGME49_312380	1.03417	9.7646	5.45386	0.000143009	0.0013981	0.950507	tetratricopeptide repeat-containing protein				sigLowFC
TGME49_223685	1.90655	9.18392	5.44696	0.000144617	0.00140865	0.939021	hypothetical protein				sigLowFC
TGME49_311440	1.75536	8.98647	5.43986	0.00014629	0.00142322	0.927198	SAG-related sequence SRS50				sigLowFC
TGME49_262710	1.38216	9.95811	5.43817	0.000146692	0.00142366	0.924382	Ctr copper transporter family protein				sigLowFC
TGME49_244580	1.11774	7.82446	5.43599	0.000147209	0.00142695	0.920761	L1P family of ribosomal protein				sigLowFC
TGME49_500368	1.95408	7.34461	5.43453	0.00014756	0.00142861	0.918319	hypothetical protein, conserved				sigLowFC
TGME49_244290	-1.23107	9.05198	-5.43145	0.000148299	0.0014323	0.913183	AP-4 complex subunit epsilon, putative				sigLowFC
TGME49_281650	-1.94813	7.89291	-5.43219	0.000148121	0.0014323	0.914418	hypothetical protein				sigLowFC
TGME49_244550	-1.05723	9.14291	-5.42841	0.000149033	0.00143592	0.908114	hypothetical protein				sigLowFC
TGME49_297810	1.16906	11.8703	5.42849	0.000149013	0.00143592	0.908247	cytochrome c oxidase subunit ApiCOX30				sigLowFC
TGME49_275650	-1.54347	11.4857	-5.41931	0.00015125	0.00145553	0.89294	hypothetical protein				sigLowFC
TGME49_235360	1.95146	8.26248	5.41383	0.000152604	0.00146678	0.883783	hypothetical protein				sigLowFC
TGME49_304880	1.86168	8.62983	5.41175	0.000153121	0.00146823	0.880308	hypothetical protein				sigLowFC
TGME49_315580	-1.60396	9.1032	-5.40329	0.000155241	0.00148678	0.866179	hypothetical protein				sigLowFC
TGME49_500252	-1.08861	8.09338	-5.38848	0.000159029	0.00151942	0.841407	AP2 domain transcription factor AP2XII-10				sigLowFC
TGME49_278050	-0.995188	10.691	-5.38653	0.000159534	0.00152243	0.838149	proteasome subunit alpha type-1, putative				sigLowFC
TGME49_311360	-0.828935	11.5722	-5.38452	0.000160058	0.0015256	0.834784	protein kinase G AGC kinase family member PKG				sigLowFC
TGME49_278850	-1.60636	9.16604	-5.38373	0.000160263	0.00152574	0.833468	palmitoyltransferase DHHC2				sigLowFC
TGME49_289700	1.52309	9.66225	5.38221	0.000160662	0.00152636	0.830911	apicomplexan kinetochore protein AKIT6, putative				sigLowFC
TGME49_292220	-1.10686	10.9965	-5.37598	0.0001623	0.00153615	0.820493	PCI domain-containing protein				sigLowFC
TGME49_315920	-1.08682	9.40449	-5.37592	0.000162317	0.00153615	0.820386	DNA-directed RNA polymerase II RPB11A				sigLowFC
TGME49_258160	1.34434	10.8281	5.37303	0.000163082	0.00154056	0.815551	carbohydrate kinase				sigLowFC
TGME49_318490	1.56466	8.00875	5.37271	0.000163168	0.00154056	0.815012	protein arginine N-methyltransferase SFM1-like, putative				sigLowFC
TGME49_315270	1.15347	11.5084	5.36856	0.000164276	0.0015492	0.808058	hypothetical protein				sigLowFC
TGME49_321290	0.979081	9.34913	5.36396	0.000165516	0.00155721	0.800336	Prp18 domain-containing protein				sigLowFC
TGME49_232430	0.960208	10.803	5.36288	0.000165807	0.00155805	0.798531	kinetochore protein SPC25, putative				sigLowFC
TGME49_258980	-1.69368	9.06069	-5.36147	0.000166189	0.00155805	0.796165	CCR4-NOT transcription complex subunit 9, putative				sigLowFC
TGME49_271610	1.7871	8.17741	5.36187	0.00016608	0.00155805	0.796838	pyrroline-5-carboxylate reductase				sigLowFC
TGME49_500176	1.32722	11.0199	5.35846	0.000167007	0.00156205	0.791123	hypothetical protein, conserved				sigLowFC
TGME49_208530	-0.82584	10.7299	-5.3568	0.000167461	0.00156447	0.788332	nicotinate phosphoribosyltransferase				sigLowFC
TGME49_224990	1.73445	10.1112	5.34622	0.000170381	0.00158619	0.770575	hypothetical protein				sigLowFC
TGME49_257350	-1.10456	10.9641	-5.3403	0.000172039	0.0015979	0.760627	eukaryotic translation initiation factor, putative				sigLowFC
TGME49_228630	-1.02865	9.0747	-5.33611	0.00017322	0.00160528	0.753598	MIR domain-containing protein				sigLowFC
TGME49_265340	1.4649	8.59278	5.33554	0.000173383	0.00160528	0.752634	hypothetical protein				sigLowFC
TGME49_260670	-0.811397	9.98143	-5.3304	0.000174848	0.00161462	0.743992	centrin 3				sigLowFC
TGME49_226250	-0.932944	11.8611	-5.31943	0.000178017	0.00163821	0.725538	DEAD (Asp-Glu-Ala-Asp) box polypeptide DDX3X				sigLowFC
TGME49_262100	1.35625	10.422	5.31427	0.000179527	0.00164856	0.716865	tetratricopeptide repeat-containing protein				sigLowFC
TGME49_225370	-1.93294	5.70797	-5.29906	0.000184063	0.00168609	0.691235	hypothetical protein				sigLowFC
TGME49_229180	-1.04641	9.96937	-5.29593	0.00018501	0.00169089	0.685966	HEAT repeat-containing protein				sigLowFC
TGME49_249935	1.10559	11.992	5.2875	0.00018759	0.00171055	0.671745	hypothetical protein				sigLowFC
TGME49_240550	1.37907	9.4678	5.27329	0.000192023	0.00174245	0.647757	copper chaperone COX17-1, putative				sigLowFC
TGME49_315110	-1.15952	10.0687	-5.27245	0.00019229	0.00174245	0.646332	prefoldin subunit 5, putative				sigLowFC
TGME49_232630	1.22097	12.378	5.26963	0.000193183	0.00174563	0.641572	hypothetical protein				sigLowFC
TGME49_214760	1.98851	8.72429	5.26608	0.000194316	0.00174993	0.635569	erythronate-4-phosphate dehydrogenase domain-containing protein				sigLowFC
TGME49_273885	-1.74719	7.04537	-5.26507	0.000194639	0.00175087	0.633861	hypothetical protein				sigLowFC
TGME49_237860	-1.76945	8.60297	-5.26135	0.000195834	0.00175965	0.627575	calcium-dependent protein kinase CDPK7A				sigLowFC
TGME49_291850	1.56196	12.8507	5.25636	0.000197451	0.00177218	0.619133	ribosomal protein RPS30				sigLowFC
TGME49_289380	-1.42524	9.73335	-5.25449	0.00019806	0.00177566	0.615969	dense granule protein GRA39				sigLowFC
TGME49_249970	1.18169	10.6636	5.25219	0.000198811	0.00177956	0.612082	acylated pleckstrin-homology domain-containing protein APH				sigLowFC
TGME49_230940	-1.6393	12.1546	-5.25094	0.000199221	0.00178008	0.609964	hypothetical protein				sigLowFC
TGME49_254480	-1.49546	8.77197	-5.24455	0.000201331	0.00179255	0.599149	WD domain, G-beta repeat-containing protein				sigLowFC
TGME49_309720	-1.91931	7.88909	-5.244	0.000201511	0.00179255	0.598229	hypothetical protein				sigLowFC
TGME49_500270	-1.18241	7.34468	-5.244	0.000201513	0.00179255	0.59822	coiled-coil domain-containing protein 39, putative				sigLowFC
TGME49_288950	1.02012	8.82085	5.242	0.000202178	0.00179646	0.594839	AP2 domain transcription factor AP2IX-4				sigLowFC
TGME49_294920	-1.69752	8.77143	-5.23412	0.000204824	0.00181594	0.581486	general transcription factor IIH polypeptide 2 GTF2H2				sigLowFC
TGME49_215290	1.13653	12.2564	5.23248	0.000205379	0.00181884	0.578709	saccharopine dehydrogenase domain-containing protein				sigLowFC
TGME49_217160	0.963224	10.653	5.2265	0.000207415	0.00183484	0.568578	Der1 family protein				sigLowFC
TGME49_254700	0.961504	8.53514	5.22206	0.000208945	0.00184226	0.561036	RING finger protein, putative				sigLowFC
TGME49_287260	1.45651	9.51834	5.22102	0.000209303	0.00184339	0.559275	hypothetical protein				sigLowFC
TGME49_259010	-1.08045	10.6746	-5.20918	0.000213441	0.00187285	0.539177	vacuolar ATP synthase subunit d, putative				sigLowFC
TGME49_221400	0.994599	8.69368	5.20273	0.000215729	0.00188958	0.528231	hypothetical protein				sigLowFC
TGME49_310770	1.23634	8.58333	5.1989	0.000217101	0.00189951	0.521722	apicoplast-associated thioredoxin family protein Atrx2				sigLowFC
TGME49_205740	-0.905507	10.765	-5.17533	0.000225747	0.00196671	0.481634	ER membrane protein complex subunit 1, putative				sigLowFC
TGME49_305980	-1.11105	9.8209	-5.17452	0.000226049	0.00196704	0.48026	pyruvate dehydrogenase complex subunit PDH-E3I				sigLowFC
TGME49_225050	-1.35381	11.1377	-5.17218	0.000226929	0.00197042	0.47627	adenosylhomocysteinase, putative				sigLowFC
TGME49_227050	1.07311	10.281	5.17014	0.000227698	0.00197402	0.4728	ATPase/histidine kinase/DNA gyrase B/HSP90 domain-containing protein				sigLowFC
TGME49_245610	-0.941167	10.0554	-5.16528	0.000229544	0.00198664	0.464512	hypothetical protein				sigLowFC
TGME49_288245	1.29119	10.4736	5.16275	0.000230509	0.00199069	0.460203	hypothetical protein				sigLowFC
TGME49_314530	0.92567	6.97875	5.16155	0.000230968	0.0019925	0.458164	RPAP1 family, C-terminal protein				sigLowFC
TGME49_294310	1.57217	8.79253	5.15794	0.000232356	0.00200232	0.452011	hypothetical protein				sigLowFC
TGME49_235560	1.18471	7.5328	5.15136	0.000234913	0.00202	0.440781	hypothetical protein				sigLowFC
TGME49_240780	1.79476	7.02226	5.14512	0.000237361	0.00203886	0.430139	hypothetical protein				sigLowFC
TGME49_500258	-1.5243	9.86485	-5.14225	0.000238495	0.0020464	0.425245	EF hand domain-containing protein				sigLowFC
TGME49_242020	-1.3781	7.82214	-5.14092	0.000239025	0.00204875	0.422967	mannosyl-oligosaccharide glucosidase				sigLowFC
TGME49_292245	-1.49029	8.41607	-5.13271	0.000242311	0.00207469	0.408957	hypothetical protein				sigLowFC
TGME49_310440	-1.8314	10.1204	-5.12382	0.000245923	0.00210112	0.39377	membrane occupation and recognition nexus protein MORN1				sigLowFC
TGME49_222220	-1.23834	11.2411	-5.1209	0.000247124	0.00210913	0.388772	alveolin domain containing intermediate filament IMC7				sigLowFC
TGME49_266620	1.24025	9.48228	5.1176	0.000248488	0.0021185	0.383124	thioredoxin CTRX1				sigLowFC
TGME49_209570	1.33655	8.50811	5.11491	0.000249603	0.00212074	0.378527	suppressor of mitotic defects protein				sigLowFC
TGME49_500025	-1.99746	9.64946	-5.11192	0.00025085	0.00212731	0.373414	GCC2 and GCC3 domain-containing protein				sigLowFC
TGME49_217620	1.33332	8.28868	5.10919	0.000251996	0.00213476	0.368737	translation initiation factor IF-1, putative				sigLowFC
TGME49_208300	1.17641	8.34156	5.10695	0.00025294	0.00213823	0.364899	hypothetical protein				sigLowFC
TGME49_273090	-1.1565	12.0375	-5.10522	0.000253668	0.00214211	0.361953	cell division protein CDC48CY				sigLowFC
TGME49_254010	0.945294	11.2955	5.10149	0.000255253	0.00215096	0.355559	serine carboxypeptidase s28 protein				sigLowFC
TGME49_223672	1.40397	9.96509	5.09511	0.000257985	0.00217169	0.344637	3'(2'),5'-bisphosphate nucleotidase				sigLowFC
TGME49_282220	0.997541	10.5659	5.09428	0.000258342	0.00217241	0.343217	AP2 domain transcription factor AP2VIIa-9				sigLowFC
TGME49_213010	-1.29863	8.62137	-5.09127	0.000259647	0.00217652	0.338046	hypothetical protein				sigLowFC
TGME49_222390	1.49963	9.04808	5.0918	0.000259415	0.00217652	0.338963	hypothetical protein				sigLowFC
TGME49_210255	1.5775	11.0271	5.08873	0.00026075	0.00218119	0.333696	mitochondrial import receptor subunit TOM7				sigLowFC
TGME49_265770	-1.30237	9.7875	-5.08755	0.000261262	0.00218319	0.331685	apicomplexan kinetochore protein AKIT5, putative				sigLowFC
TGME49_318690	1.57858	7.17603	5.08624	0.000261836	0.0021857	0.329434	RNA recognition motif-containing protein				sigLowFC
TGME49_253470	1.2176	10.9851	5.08415	0.000262752	0.00218594	0.325848	alveolin domain containing intermediate filament IMC13				sigLowFC
TGME49_271250	1.61124	9.24607	5.08306	0.000263232	0.00218594	0.323978	KH domain-containing protein				sigLowFC
TGME49_259580	1.24084	9.3857	5.07604	0.000266337	0.00220235	0.311946	hypothetical protein				sigLowFC
TGME49_267620	-1.45457	8.62844	-5.07759	0.000265649	0.00220235	0.314601	IMC sutures component ISC6				sigLowFC
TGME49_278270	1.66994	8.99009	5.07549	0.000266584	0.00220235	0.310994	nucleolar protein, structural component of H/ACA snoRNPs, putative				sigLowFC
TGME49_309560	0.941292	11.5364	5.07696	0.000265931	0.00220235	0.313512	nmda receptor glutamate-binding chain				sigLowFC
TGME49_219682	-0.983114	9.47662	-5.07028	0.000268919	0.00221706	0.302046	pyruvate dehydrogenase kinase, putative				sigLowFC
TGME49_236840	-0.997186	9.6095	-5.06875	0.000269605	0.00222043	0.299432	zinc finger (C-x8-C-x5-C-x3-H)-2, putative				sigLowFC
TGME49_278170	1.64762	8.26217	5.05712	0.000274909	0.00226177	0.279448	hypothetical protein				sigLowFC
TGME49_310030	1.10209	11.7649	5.05595	0.000275447	0.00226387	0.277442	cyclase-associated protein CAP				sigLowFC
TGME49_266460	1.76419	11.8465	5.0521	0.00027723	0.00227619	0.270823	small ubiquitin family modifier, putative				sigLowFC
TGME49_267420	1.40155	12.0316	5.04295	0.000281511	0.00230425	0.255101	mago nashi family protein 2, putative				sigLowFC
TGME49_292160	1.23857	9.9711	5.04329	0.000281354	0.00230425	0.255675	replication termination factor, putative				sigLowFC
TGME49_227800	-1.12536	9.55206	-5.04216	0.000281886	0.00230495	0.253737	Eps15-like protein				sigLowFC
TGME49_227080	1.62053	7.96291	5.04059	0.000282628	0.00230634	0.25104	PCIF1 WW domain-containing protein				sigLowFC
TGME49_312840	-0.909944	9.21529	-5.04058	0.000282633	0.00230634	0.251024	hypothetical protein				sigLowFC
TGME49_245660	1.0371	10.1945	5.03839	0.000283672	0.00230858	0.247257	zinc finger protein, putative				sigLowFC
TGME49_313410	-0.89961	10.3825	-5.03858	0.000283585	0.00230858	0.247572	proteasome 26S regulatory subunit				sigLowFC
TGME49_266640	-0.857423	10.606	-5.03153	0.000286958	0.00232814	0.235444	acetyl-CoA synthetase ACS				sigLowFC
TGME49_285920	-1.91861	5.03274	-5.03074	0.000287342	0.00232814	0.234074	glutathione S-transferase 3				sigLowFC
TGME49_280510	1.66804	8.35061	5.02529	0.000289982	0.00234384	0.224694	Dpy-30 motif protein				sigLowFC
TGME49_320680	1.93205	7.96502	5.02492	0.000290159	0.00234384	0.224067	AP2 domain transcription factor AP2IV-2				sigLowFC
TGME49_261250	1.46442	10.0773	5.0189	0.00029311	0.00236501	0.213688	histone H2A1				sigLowFC
TGME49_271030	1.08404	10.5035	5.01816	0.000293472	0.00236501	0.212421	AP2 domain transcription factor AP2VIII-6				sigLowFC
TGME49_306390	1.24473	11.1911	5.01777	0.000293666	0.00236501	0.211744	cytochrome c oxidase subunit 6B, putative				sigLowFC
TGME49_230630	0.970854	8.74877	5.01583	0.000294625	0.00237034	0.2084	hypothetical protein				sigLowFC
TGME49_311310	-1.47944	10.0137	-5.01196	0.000296551	0.00238344	0.201718	serine/threonine protein phosphatase 2B catalytic subunit A				sigLowFC
TGME49_242650	1.63588	6.93553	5.00908	0.000297988	0.00239258	0.19676	hypothetical protein				sigLowFC
TGME49_277930	-1.90912	9.16903	-5.00843	0.000298316	0.00239281	0.195633	WD40 repeat-containing protein				sigLowFC
TGME49_224950	1.57281	8.80127	4.99748	0.000303861	0.00243404	0.176747	calcium-dependent protein kinase CDPK5				sigLowFC
TGME49_247360	1.4933	10.4236	4.99592	0.000304661	0.00243404	0.17405	PAP2 superfamily protein				sigLowFC
TGME49_284570	1.39877	9.29863	4.99589	0.000304674	0.00243404	0.174006	hypothetical protein				sigLowFC
TGME49_290290	-1.02135	10.8146	-4.99596	0.00030464	0.00243404	0.174121	ubiquitin-activating enzyme E1 family protein				sigLowFC
TGME49_278780	-1.91178	7.62871	-4.99201	0.000306673	0.00244757	0.167298	hypothetical protein				sigLowFC
TGME49_221470	0.882053	10.9297	4.9903	0.000307558	0.00245218	0.164344	hypothetical protein				sigLowFC
TGME49_259610	0.911232	8.25666	4.98075	0.000312545	0.00248946	0.14785	hypothetical protein				sigLowFC
TGME49_313330	1.01951	10.1067	4.98007	0.000312902	0.00248983	0.146679	rhoptry kinase family protein ROP27				sigLowFC
TGME49_312300	-1.01604	9.60309	-4.97638	0.000314856	0.00250288	0.140297	TBC domain-containing protein TBC16				sigLowFC
TGME49_293610	0.855944	9.81738	4.97422	0.000316005	0.00250952	0.136561	dihydroorotase				sigLowFC
TGME49_300160	1.38712	9.09877	4.97349	0.000316392	0.0025101	0.135308	hypothetical protein				sigLowFC
TGME49_316400	-0.800508	14.7948	-4.96664	0.000320072	0.00253679	0.123449	alpha tubulin TUBA1				sigLowFC
TGME49_225250	1.62878	9.75295	4.96516	0.00032087	0.00254059	0.120897	LSU ribosomal protein L14P, putative				sigLowFC
TGME49_228370	0.969813	10.6729	4.96351	0.000321763	0.00254263	0.118045	hypothetical protein				sigLowFC
TGME49_260650	-1.24286	5.96764	-4.9604	0.000323459	0.00255009	0.112656	glycosyltransferase, group 2 family protein				sigLowFC
TGME49_273060	1.27094	9.42671	4.96028	0.000323527	0.00255009	0.112441	ribosomal protein S17, putative				sigLowFC
TGME49_297900	1.28334	9.28061	4.96003	0.000323664	0.00255009	0.112008	dense granule protein GRA83				sigLowFC
TGME49_206680	1.75942	8.67656	4.95691	0.000325373	0.0025596	0.106608	hypothetical protein				sigLowFC
TGME49_247730	1.2377	9.75794	4.95277	0.000327653	0.00257139	0.0994485	AP2 domain transcription factor AP2XII-5				sigLowFC
TGME49_279550	0.99884	9.45893	4.94927	0.000329595	0.00258409	0.0933898	hypothetical protein				sigLowFC
TGME49_228360	-0.826616	11.9984	-4.94597	0.000331441	0.00259601	0.0876657	peptidyl-prolyl isomerase FKBP12, putative				sigLowFC
TGME49_240270	1.60677	9.55059	4.94459	0.000332212	0.00259951	0.0852838	hypothetical protein				sigLowFC
TGME49_286070	1.35899	8.76539	4.9423	0.000333503	0.00260706	0.0813081	cytochrome c oxidase assembly protein PET191, putative				sigLowFC
TGME49_263630	1.45148	11.1349	4.93849	0.000335657	0.00261878	0.0747076	hypothetical protein				sigLowFC
TGME49_230960	-1.1358	10.3597	-4.93757	0.000336183	0.00262033	0.0731025	splicing factor 3b, subunit 3, putative				sigLowFC
TGME49_206340	1.24529	10.7652	4.93674	0.000336655	0.00262145	0.0716625	hypothetical protein				sigLowFC
TGME49_220170	1.25001	8.27908	4.93535	0.000337448	0.00262156	0.0692508	coiled-coil domain-containing protein				sigLowFC
TGME49_500438	1.01454	7.53859	4.93364	0.000338421	0.00262243	0.0663002	SPAG17 domain-containing protein				sigLowFC
TGME49_312820	-1.57604	9.12998	-4.93085	0.000340026	0.00262978	0.0614488	hypothetical protein				sigLowFC
TGME49_500222	-1.79061	9.48886	-4.9313	0.000339766	0.00262978	0.0622346	GCC2 and GCC3 domain-containing protein				sigLowFC
TGME49_248870	-1.27041	8.19592	-4.92877	0.000341222	0.00263393	0.0578504	SNARE associated Golgi protein				sigLowFC
TGME49_239080	-1.04454	7.1101	-4.9271	0.00034219	0.00263502	0.0549478	carrier superfamily protein				sigLowFC
TGME49_266120	1.02192	11.2614	4.92702	0.000342237	0.00263502	0.0548067	thioredoxin-dependent peroxidase TPX1/2				sigLowFC
TGME49_258950	-0.834272	9.90352	-4.92556	0.000343082	0.0026381	0.0522797	lectin family protein				sigLowFC
TGME49_205350	-1.27971	11.3988	-4.91924	0.000346773	0.00265373	0.0413093	integral membrane protein, GNS1/SUR4 family protein, putative				sigLowFC
TGME49_311790	1.14831	8.9778	4.91663	0.000348313	0.00266296	0.0367682	hypothetical protein				sigLowFC
TGME49_314650	1.25467	7.85834	4.91509	0.00034922	0.00266734	0.034104	hypothetical protein				sigLowFC
TGME49_218260	1.01323	13.5087	4.90968	0.000352439	0.00268918	0.0247001	histone H3.3				sigLowFC
TGME49_259570	1.20776	8.91421	4.90916	0.000352751	0.00268918	0.0237925	CMP/dCMP deaminase, zinc-binding, putative				sigLowFC
TGME49_226560	1.45663	9.81875	4.90726	0.000353886	0.00269526	0.0205003	pre-mRNA-splicing factor CWC24, putative				sigLowFC
TGME49_320210	-1.00501	9.95237	-4.90159	0.000357303	0.00271353	0.0106519	pre-mRNA-processing factor 19, putative				sigLowFC
TGME49_222270	-1.42526	8.62694	-4.89955	0.000358541	0.00271833	0.00710504	hypothetical protein				sigLowFC
TGME49_277500	-0.787177	10.7621	-4.89943	0.000358614	0.00271833	0.00689705	26S proteasome regulatory subunit 7, putative				sigLowFC
TGME49_259070	1.03494	7.74505	4.89876	0.000359028	0.00271889	0.00571614	acetyltransferase, GNAT family protein				sigLowFC
TGME49_233120	-1.94193	8.73063	-4.89661	0.000360337	0.00272622	0.00198556	AP2 domain transcription factor AP2VIII-2				sigLowFC
TGME49_275770	1.40879	9.31699	4.88991	0.000364458	0.00275219	-0.00966946	hypothetical protein				sigLowFC
TGME49_313950	1.75941	8.6991	4.88522	0.000367375	0.0027716	-0.0178384	GMC oxidoreductase				sigLowFC
TGME49_312150	-0.900518	8.60551	-4.88446	0.000367849	0.00277256	-0.019159	hypothetical protein				sigLowFC
TGME49_286650	1.27073	11.7567	4.8803	0.000370454	0.00278957	-0.0263904	hypothetical protein				sigLowFC
TGME49_255650	-0.912874	9.86238	-4.87792	0.000371956	0.00279825	-0.0305371	palmitoyltransferase DHHC8				sigLowFC
TGME49_500096	1.24821	9.3057	4.87716	0.000372438	0.00279924	-0.0318632	hypothetical protein, conserved				sigLowFC
TGME49_219190	1.16999	10.8518	4.87645	0.000372885	0.00279996	-0.0330917	nuclear movement protein domain containing protein				sigLowFC
TGME49_203270	-1.00093	8.65063	-4.86899	0.000377644	0.00282773	-0.0460864	ATP-dependent Clp endopeptidase, proteolytic subunit ClpP domain-containing protein				sigLowFC
TGME49_220090	1.20251	10.5872	4.86258	0.000381787	0.00285341	-0.057267	DIX domain-containing protein				sigLowFC
TGME49_259940	-1.06407	10.4375	-4.85849	0.000384454	0.00287066	-0.0643976	hypothetical protein				sigLowFC
TGME49_262040	-0.907377	10.6925	-4.85703	0.00038541	0.00287512	-0.0669431	SAC3/GANP family protein				sigLowFC
TGME49_255730	1.79552	5.44592	4.85392	0.00038746	0.00288502	-0.0723769	hypothetical protein				sigLowFC
TGME49_205300	1.27014	9.47572	4.84798	0.000391395	0.00290891	-0.0827308	hypothetical protein				sigLowFC
TGME49_205330	1.12402	10.6138	4.84064	0.000396319	0.00293666	-0.0955382	hypothetical protein				sigLowFC
TGME49_228280	-1.72595	9.01465	-4.84172	0.000395593	0.00293666	-0.09366	hypothetical protein				sigLowFC
TGME49_239885	1.19147	7.76864	4.84033	0.000396533	0.00293666	-0.0960912	protein kinase, putative				sigLowFC
TGME49_213690	1.60955	10.501	4.83859	0.000397713	0.00293987	-0.0991338	E3 ubiquitin-protein ligase RBX1, putative				sigLowFC
TGME49_242030	-1.28757	7.80319	-4.83851	0.000397766	0.00293987	-0.0992716	conserved oligomeric Golgi complex subunit 7				sigLowFC
TGME49_237460	-1.97662	6.57737	-4.83622	0.000399322	0.00294103	-0.103269	DER1-like protein				sigLowFC
TGME49_249460	-1.9537	8.2846	-4.83682	0.000398908	0.00294103	-0.102208	WD domain, G-beta repeat-containing protein				sigLowFC
TGME49_289530	1.31802	12.8798	4.83772	0.000398299	0.00294103	-0.100643	ribosomal protein RPL19				sigLowFC
TGME49_253530	1.34227	8.16846	4.83491	0.000400216	0.00294437	-0.105561	ribonuclease P/MRP protein subunit POP5, putative				sigLowFC
TGME49_271260	-0.916133	10.6263	-4.82888	0.000404347	0.0029693	-0.11608	hypothetical protein				sigLowFC
TGME49_249370	1.32587	11.9205	4.82068	0.00041005	0.00300841	-0.130425	translation initiation factor SUI1, putative				sigLowFC
TGME49_267400	1.72076	11.8831	4.8185	0.000411575	0.00301407	-0.134229	ribosomal protein RPL32				sigLowFC
TGME49_301216	0.966018	7.69373	4.80926	0.000418125	0.00305644	-0.1504	endonuclease/exonuclease/phosphatase family protein				sigLowFC
TGME49_213020	1.53359	9.56695	4.80812	0.000418944	0.00305756	-0.152403	RING zinc finger protein				sigLowFC
TGME49_316140	-1.1371	10.4284	-4.80798	0.000419043	0.00305756	-0.152647	MGR2 domain-containing protein				sigLowFC
TGME49_226010	1.52137	10.2226	4.80534	0.000420937	0.00306858	-0.157263	pterin-4-alpha-carbinolamine dehydratase				sigLowFC
TGME49_248710	1.53716	10.535	4.80129	0.000423859	0.00308426	-0.164349	peptidase, putative				sigLowFC
TGME49_260200	0.999616	9.80511	4.8018	0.000423492	0.00308426	-0.163462	helicase associated domain (ha2) protein				sigLowFC
TGME49_219140	1.39262	11.8515	4.79635	0.000427454	0.00310463	-0.172999	EF-1 guanine nucleotide exchange domain-containing protein				sigLowFC
TGME49_310750	-0.858193	11.6908	-4.79111	0.000431306	0.00312424	-0.182186	emp24/gp25L/p24 family protein				sigLowFC
TGME49_224530	-1.73935	7.42995	-4.7888	0.000433016	0.00313095	-0.186237	alveolin domain containing intermediate filament IMC5				sigLowFC
TGME49_219320	-1.66784	11.1723	-4.78685	0.000434462	0.00313573	-0.18965	gliding-associated protein GAP50				sigLowFC
TGME49_268830	-1.15772	10.7236	-4.7821	0.000438009	0.00315848	-0.197976	ATP synthase subunit delta				sigLowFC
TGME49_233890	-1.36071	9.46025	-4.78037	0.000439306	0.00316213	-0.201004	hypothetical protein				sigLowFC
TGME49_314750	-1.97246	7.80056	-4.78055	0.000439173	0.00316213	-0.200693	ribosomal protein L1, putative				sigLowFC
TGME49_276990	1.28361	10.374	4.77223	0.000445477	0.00320367	-0.215286	membrane-associated progesterone-binding protein homolog MAPR				sigLowFC
TGME49_239830	-1.7006	8.55962	-4.76753	0.000449077	0.00322376	-0.223527	TBC domain-containing protein TBC11				sigLowFC
TGME49_217550	1.19652	11.2355	4.76677	0.000449664	0.00322491	-0.224866	dynactin subunit 6, putative				sigLowFC
TGME49_276140	-1.13729	11.4507	-4.76216	0.000453235	0.00324487	-0.232964	ADP ribosylation factor ARF1				sigLowFC
TGME49_265420	-0.835473	11.0086	-4.75603	0.000458028	0.00327625	-0.243733	hypothetical protein				sigLowFC
TGME49_247320	0.979586	8.14076	4.75009	0.000462719	0.00329801	-0.254164	histone RNA hairpin-binding protein, putative				sigLowFC
TGME49_299110	-1.45009	9.54843	-4.74473	0.000467	0.0033247	-0.263591	cleft lip and palate transmembrane protein 1 (clptm1) protein				sigLowFC
TGME49_203980	-1.44334	10.4535	-4.74115	0.00046988	0.00334011	-0.269884	hypothetical protein				sigLowFC
TGME49_294230	1.47301	11.4657	4.73704	0.000473205	0.00336076	-0.277102	hypothetical protein				sigLowFC
TGME49_250350	1.22989	10.5506	4.73173	0.000477546	0.00338558	-0.286449	CRIPT, putative				sigLowFC
TGME49_294320	1.86623	7.0187	4.72765	0.000480902	0.00340636	-0.293617	Oxysterol-binding protein				sigLowFC
TGME49_263500	-1.13576	10.7796	-4.72641	0.000481934	0.00340968	-0.29581	vacuolar protein sorting-associated protein 26, putative				sigLowFC
TGME49_290605	1.02799	7.89247	4.72554	0.000482651	0.00340968	-0.297332	hypothetical protein				sigLowFC
TGME49_500040	1.76676	7.42766	4.72276	0.000484968	0.00342001	-0.302234	MORN repeat-containing protein				sigLowFC
TGME49_316255	1.42944	11.1985	4.71451	0.000491906	0.00346283	-0.31677	hypothetical protein				sigLowFC
TGME49_240280	-1.30649	10.1481	-4.71283	0.000493323	0.00346975	-0.319715	S1/P1nuclease				sigLowFC
TGME49_240070	-0.972089	9.87974	-4.70451	0.000500446	0.00351367	-0.334384	RNA recognition motif-containing protein				sigLowFC
TGME49_301450	-1.05714	9.16479	-4.70349	0.000501328	0.00351677	-0.336186	FG-GAP repeat-containing protein				sigLowFC
TGME49_203030	0.961521	11.5992	4.70297	0.000501778	0.00351684	-0.337105	N-methyl-D-aspartate receptor-associated protein				sigLowFC
TGME49_215510	1.15199	9.54742	4.69825	0.000505872	0.00353301	-0.34542	MraW methylase family protein				sigLowFC
TGME49_309920	1.0003	9.63708	4.69777	0.000506294	0.00353301	-0.346272	hypothetical protein				sigLowFC
TGME49_241165	-1.64577	7.81479	-4.69664	0.000507276	0.00353678	-0.348256	hypothetical protein				sigLowFC
TGME49_329100	1.89492	8.42732	4.69395	0.000509636	0.00354705	-0.353004	Toxoplasma gondii family C protein				sigLowFC
TGME49_269760	-1.81032	8.01928	-4.69183	0.000511505	0.00355387	-0.356751	'chromo' (CHRromatin Organization MOdifier) domain-containing protein				sigLowFC
TGME49_237010	1.06233	9.424	4.68667	0.000516076	0.00357941	-0.365853	RAP domain-containing protein				sigLowFC
TGME49_216180	1.39071	12.0114	4.68449	0.000518023	0.00358737	-0.369706	hypothetical protein				sigLowFC
TGME49_500148	1.15592	10.08	4.67976	0.00052226	0.00360978	-0.37804	GCC2 and GCC3 domain-containing protein				sigLowFC
TGME49_246090	1.10792	9.23862	4.67879	0.000523139	0.00361273	-0.379759	hypothetical protein				sigLowFC
TGME49_305770	-1.26019	9.38551	-4.67794	0.000523904	0.00361489	-0.381255	ABC transporter, ATP-binding domain-containing protein				sigLowFC
TGME49_258790	-0.841491	9.52536	-4.67418	0.000527322	0.00363534	-0.387908	protein essential for chromosome replication ECR1				sigLowFC
TGME49_231430	0.837688	11.6639	4.67048	0.000530702	0.00365549	-0.394445	oligosaccharyl transferase stt3 protein, putative				sigLowFC
TGME49_224070	-1.686	7.73963	-4.66871	0.000532322	0.0036572	-0.397561	hypothetical protein				sigLowFC
TGME49_245580	-1.44613	7.92233	-4.66876	0.000532279	0.0036572	-0.39748	protein kinase, putative				sigLowFC
TGME49_269970	0.877552	10.0352	4.66905	0.000532008	0.0036572	-0.396958	hypothetical protein				sigLowFC
TGME49_233350	1.16605	11.9892	4.66702	0.000533884	0.00366478	-0.400559	nuclear transport factor 2, putative				sigLowFC
TGME49_212725	0.89146	10.4012	4.66569	0.00053511	0.00366716	-0.402906	hypothetical protein				sigLowFC
TGME49_249850	-1.19993	11.3873	-4.66565	0.000535148	0.00366716	-0.402978	GAP40 protein				sigLowFC
TGME49_291880	1.56959	9.28137	4.6647	0.000536025	0.00367003	-0.404653	hypothetical protein				sigLowFC
TGME49_226980	0.966337	10.9033	4.66308	0.000537529	0.00367718	-0.40752	hypothetical protein				sigLowFC
TGME49_232050	-0.924754	11.2965	-4.66134	0.000539143	0.00368192	-0.410585	DnaJ domain-containing protein				sigLowFC
TGME49_273030	1.52514	8.44778	4.66165	0.000538856	0.00368192	-0.410041	phosphoglycerate mutase PGM1				sigLowFC
TGME49_258832	-1.94763	8.79412	-4.65664	0.000543547	0.00370251	-0.418908	Vps52 / Sac2 family protein				sigLowFC
TGME49_231350	-1.52156	10.311	-4.65463	0.000545437	0.00371222	-0.422457	glucosamine-fructose-6-phosphate aminotransferase				sigLowFC
TGME49_255450	-1.94736	8.98824	-4.6539	0.000546128	0.00371376	-0.423752	inner membrane complex protein IMC31				sigLowFC
TGME49_265990	1.11067	9.35067	4.64506	0.000554542	0.00376139	-0.439391	hypothetical protein				sigLowFC
TGME49_265470	-1.08309	9.05658	-4.64214	0.000557353	0.00377405	-0.444561	hypothetical protein				sigLowFC
TGME49_500294	1.34953	8.57216	4.64143	0.000558032	0.00377545	-0.445806	protein BRAWNIN, putative				sigLowFC
TGME49_203960	-0.849561	9.00178	-4.64043	0.000559004	0.00377883	-0.447586	hypothetical protein				sigLowFC
TGME49_221330	-0.88476	8.34145	-4.63934	0.000560058	0.00378276	-0.449513	DNA gyrase subunit A				sigLowFC
TGME49_285660	-1.25721	10.0004	-4.63077	0.000568435	0.0038361	-0.464697	DEAD/DEAH box helicase domain-containing protein				sigLowFC
TGME49_231030	-1.33084	9.01409	-4.62819	0.000570976	0.00384999	-0.469257	protein ARV1, putative				sigLowFC
TGME49_297710	1.50472	8.52817	4.62487	0.000574276	0.00386898	-0.47515	hypothetical protein				sigLowFC
TGME49_277230	1.59755	8.94872	4.62307	0.000576071	0.00387781	-0.478341	dense granule protein GRA82	GRA82	Merozoite		sigLowFC
TGME49_231600	-1.65706	10.3831	-4.62227	0.000576867	0.00387991	-0.479754	HEAT repeat-containing protein				sigLowFC
TGME49_269900	0.926008	11.2486	4.62128	0.000577859	0.00388331	-0.48151	WD domain, G-beta repeat-containing protein				sigLowFC
TGME49_289760	-0.991361	9.51078	-4.62009	0.000579056	0.00388808	-0.483626	biotin--protein ligase, putative				sigLowFC
TGME49_254635	1.81046	4.98132	4.61296	0.000586256	0.00392983	-0.496261	hypothetical protein				sigLowFC
TGME49_244700	1.31769	9.66322	4.60731	0.000592032	0.00396191	-0.506285	NAD(+)/NADH kinase domain-containing protein				sigLowFC
TGME49_240210	-1.41711	8.8605	-4.60585	0.000593534	0.00396863	-0.508875	phosphate transporter family protein, putative				sigLowFC
TGME49_289830	-1.0547	11.5441	-4.60052	0.000599048	0.00400216	-0.518329	eukaryotic initiation factor-3, delta subunit, putative				sigLowFC
TGME49_294830	1.46853	7.60678	4.58936	0.000610774	0.00406353	-0.538146	methyltransferase domain-containing protein				sigLowFC
TGME49_309930	1.66898	7.21544	4.58882	0.000611349	0.00406397	-0.539108	dense granule protein GRA56				sigLowFC
TGME49_211300	1.59856	7.98348	4.5834	0.000617132	0.004099	-0.548731	DUF74 family protein, putative				sigLowFC
TGME49_310700	1.02081	12.4728	4.58285	0.000617723	0.00409953	-0.549711	serine/threonine phosphatase PP1				sigLowFC
TGME49_244520	-1.60471	8.70185	-4.57789	0.000623073	0.00413161	-0.558525	glycosyl transferase, group 4 family protein				sigLowFC
TGME49_246960	-0.769978	9.17978	-4.57522	0.000625978	0.00414399	-0.563278	hypothetical protein				sigLowFC
TGME49_290170	-1.33577	10.3945	-4.57552	0.00062565	0.00414399	-0.562744	protein phosphatase PPKL				sigLowFC
TGME49_237835	-1.20168	0.212543	-4.57439	0.000626879	0.00414653	-0.564749	hypothetical protein				sigLowFC
TGME49_320220	-0.937517	10.4494	-4.57217	0.00062931	0.00415573	-0.568705	cytochrome b-c1 complex subunit Rieske, putative				sigLowFC
TGME49_263840	-1.02479	8.61896	-4.57165	0.000629879	0.00415606	-0.569628	hypothetical protein				sigLowFC
TGME49_271015	1.86177	4.18498	4.57032	0.000631339	0.00416226	-0.571995	hypothetical protein				sigLowFC
TGME49_254540	-1.564	8.84121	-4.55668	0.000646509	0.00425053	-0.59626	CDP-alcohol phosphatidyltransferase superfamily protein				sigLowFC
TGME49_250830	-0.739428	10.3474	-4.55579	0.000647516	0.00425119	-0.59785	26S proteasome regulatory subunit RPN12, putative				sigLowFC
TGME49_313780	-1.02121	7.77194	-4.55534	0.000648019	0.00425119	-0.598643	hypothetical protein				sigLowFC
TGME49_202750	-1.04709	8.80354	-4.55431	0.000649179	0.00425187	-0.600471	3' exoribonuclease family, domain 1 domain-containing protein				sigLowFC
TGME49_289900	1.67371	7.18884	4.55431	0.000649185	0.00425187	-0.60048	n-acetyltransferase family protein				sigLowFC
TGME49_263570	0.819582	10.0727	4.5527	0.000651006	0.00425682	-0.603343	hypothetical protein				sigLowFC
TGME49_295440	1.66482	8.04582	4.553	0.00065067	0.00425682	-0.602815	hypothetical protein				sigLowFC
TGME49_235970	-1.12742	11.3403	-4.55222	0.000651547	0.00425688	-0.604191	eukaryotic initiation factor-2 gamma, putative				sigLowFC
TGME49_201840	1.76747	11.8936	4.5512	0.000652707	0.0042575	-0.606009	aspartyl protease ASP1				sigLowFC
TGME49_500153	-1.20834	5.81022	-4.55134	0.00065255	0.0042575	-0.605764	WD repeat-containing protein				sigLowFC
TGME49_249030	1.38505	11.2208	4.5462	0.000658428	0.00428783	-0.614927	endonuclease/exonuclease/phosphatase family protein				sigLowFC
TGME49_203170	-0.750649	9.75238	-4.54284	0.000662294	0.00430949	-0.620908	OB-fold nucleic acid binding domain-containing protein				sigLowFC
TGME49_306730	1.33131	6.46403	4.54138	0.000663975	0.00431341	-0.623498	hypothetical protein				sigLowFC
TGME49_310660	1.46652	9.33722	4.54138	0.000663975	0.00431341	-0.623498	Dullard family phosphatase domain-containing protein				sigLowFC
TGME49_312960	1.35898	9.65662	4.53815	0.000667725	0.00433425	-0.629252	ribosome biogenesis protein NOP16, putative				sigLowFC
TGME49_251560	-1.13833	10.0643	-4.53704	0.000669026	0.00433917	-0.631241	hypothetical protein				sigLowFC
TGME49_248190	0.799666	8.9883	4.53532	0.00067103	0.00434411	-0.634297	hypothetical protein				sigLowFC
TGME49_500373	1.96748	6.35423	4.53548	0.000670842	0.00434411	-0.63401	MORN repeat-containing protein				sigLowFC
TGME49_310710	-1.06041	8.3305	-4.53345	0.00067323	0.0043488	-0.63764	small ribosomal subunit Rsm22 protein				sigLowFC
TGME49_204490	1.20105	10.206	4.53139	0.000675654	0.00436094	-0.641312	hypothetical protein				sigLowFC
TGME49_262150	-1.49683	8.88927	-4.52938	0.000678023	0.0043727	-0.644888	kelch protein K13				sigLowFC
TGME49_228380	1.40084	8.72299	4.52165	0.000687234	0.00441786	-0.658673	hypothetical protein				sigLowFC
TGME49_500203	1.61757	8.49692	4.51713	0.000692686	0.0044462	-0.666745	cytochrome c oxidase subunit 6B, putative				sigLowFC
TGME49_286730	0.990585	9.63506	4.51478	0.000695537	0.00446047	-0.670939	signal recognition particle subunit SRP19, putative				sigLowFC
TGME49_247380	-1.41983	8.26351	-4.51351	0.000697081	0.00446572	-0.673205	cell division control protein CDC50, putative				sigLowFC
TGME49_295040	-1.16968	10.2377	-4.51319	0.000697471	0.00446572	-0.673776	HEAT repeat-containing protein				sigLowFC
TGME49_232280	1.34153	10.2345	4.51263	0.000698149	0.00446648	-0.674768	hypothetical protein				sigLowFC
TGME49_263595	1.61892	9.55303	4.51139	0.000699667	0.00446852	-0.676986	RNA-binding protein				sigLowFC
TGME49_293260	-1.42876	10.6696	-4.50953	0.000701947	0.00447645	-0.68031	ATPase/histidine kinase/DNA gyrase B/HSP90 domain-containing protein				sigLowFC
TGME49_255910	1.45527	9.7641	4.50109	0.00071238	0.00453214	-0.695378	PfMNL-2 CISD1 family iron-sulfur protein, putative				sigLowFC
TGME49_202900	0.977498	9.18219	4.5003	0.000713366	0.00453481	-0.69679	zinc finger (CCCH type) motif-containing protein				sigLowFC
TGME49_235020	-0.999252	10.9795	-4.49729	0.000717133	0.0045443	-0.702169	COPI protein, putative				sigLowFC
TGME49_262780	-1.12611	10.3331	-4.49769	0.000716635	0.0045443	-0.701459	FHA domain-containing protein				sigLowFC
TGME49_217450	1.33623	9.21317	4.49658	0.000718018	0.00454631	-0.703429	general transcription factor IIH polypeptide 5 GTF2H5				sigLowFC
TGME49_318600	0.774381	9.73047	4.49295	0.000722601	0.0045681	-0.709926	DNA /pantothenate metabolism flavoprotein				sigLowFC
TGME49_255880	0.969381	9.23023	4.49181	0.000724047	0.00457362	-0.711968	hypothetical protein				sigLowFC
TGME49_280710	-1.17545	10.6229	-4.47927	0.000740113	0.00466773	-0.734377	proteasome subunit beta type-4, putative				sigLowFC
TGME49_500161	1.0928	10.3678	4.4717	0.000750002	0.00471894	-0.747929	hypothetical protein, conserved				sigLowFC
TGME49_500140	1.85747	10.187	4.47075	0.000751253	0.00472309	-0.74963	hypothetical protein, conserved				sigLowFC
TGME49_215550	-1.2874	9.33134	-4.46476	0.000759176	0.00476768	-0.760341	exonuclease V, putative				sigLowFC
TGME49_256060	1.78417	10.606	4.46449	0.000759538	0.00476768	-0.760828	nucleosome assembly protein (nap) protein				sigLowFC
TGME49_313820	1.5077	9.96642	4.46388	0.000760354	0.00476906	-0.761925	dynactin p25, putative				sigLowFC
TGME49_500185	1.18295	8.59555	4.45736	0.0007691	0.00481636	-0.773599	WD domain, G-beta repeat-containing protein				sigLowFC
TGME49_288530	1.09462	10.1327	4.45646	0.000770311	0.0048199	-0.775205	NOL1/NOP2/sun family protein				sigLowFC
TGME49_211430	1.39323	6.33551	4.4514	0.000777179	0.00485555	-0.784266	centrosomal protein CEP110, putative				sigLowFC
TGME49_201820	0.887428	8.17281	4.44737	0.000782695	0.00488619	-0.791485	hypothetical protein				sigLowFC
TGME49_283855	-1.72425	3.24054	-4.44666	0.00078367	0.00488846	-0.792754	hypothetical protein				sigLowFC
TGME49_202680	-0.930188	12.0871	-4.44527	0.000785595	0.00489284	-0.795259	cytochrome b-c1 complex subunit 2				sigLowFC
TGME49_268880	1.91733	8.66741	4.43935	0.000793799	0.00494009	-0.805863	hypothetical protein				sigLowFC
TGME49_212820	-1.30629	9.58995	-4.43581	0.000798752	0.00496432	-0.81221	ubiquitin family protein				sigLowFC
TGME49_256830	-1.87438	8.51595	-4.43568	0.000798934	0.00496432	-0.812443	SacI domain-containing protein				sigLowFC
TGME49_319900	-1.682	8.81747	-4.43348	0.000802027	0.00497964	-0.816386	apical annuli protein AAP5				sigLowFC
TGME49_314820	1.08696	9.67134	4.43257	0.000803308	0.00497989	-0.818015	atp synthase F1, epsilon subunit, putative				sigLowFC
TGME49_204070	1.11035	8.99871	4.43187	0.000804297	0.00498138	-0.819271	YT521-B family protein				sigLowFC
TGME49_293860	1.32166	9.83359	4.43045	0.000806314	0.00498352	-0.821827	CS domain-containing protein				sigLowFC
TGME49_310250	1.32409	7.65207	4.4304	0.000806386	0.00498352	-0.821918	hypothetical protein				sigLowFC
TGME49_231800	-1.06943	7.72933	-4.42678	0.000811532	0.00501144	-0.828409	helicase, putative				sigLowFC
TGME49_239020	1.23389	9.287	4.42629	0.000812225	0.00501185	-0.829279	ABC transporter transmembrane region domain-containing protein				sigLowFC
TGME49_289570	-1.00613	10.2462	-4.42451	0.000814771	0.00501982	-0.832473	phosphatidylinositol transfer protein				sigLowFC
TGME49_315780	1.05401	9.84758	4.42097	0.000819865	0.00504731	-0.838833	myosin light chain MLC7				sigLowFC
TGME49_309590	-1.96314	8.06885	-4.41946	0.000822045	0.00505684	-0.841543	rhoptry protein ROP1				sigLowFC
TGME49_265410	-0.915339	9.08582	-4.41871	0.000823136	0.00505966	-0.842896	pre-mRNA-processing factor 17, putative				sigLowFC
TGME49_272000	-1.46803	8.69149	-4.41735	0.000825105	0.00506398	-0.845334	hypothetical protein				sigLowFC
TGME49_295980	-1.1961	9.37525	-4.41455	0.000829174	0.00508505	-0.850353	hypothetical protein				sigLowFC
TGME49_217900	1.01816	10.3614	4.41091	0.000834504	0.00511181	-0.85689	hypothetical protein				sigLowFC
TGME49_247040	-1.60741	10.0276	-4.41027	0.000835455	0.00511181	-0.858053	hypothetical protein				sigLowFC
TGME49_257420	1.64444	8.51347	4.41027	0.000835447	0.00511181	-0.858043	hypothetical protein				sigLowFC
TGME49_213650	1.13033	9.8693	4.40669	0.000840725	0.00513619	-0.864468	ATP-binding domain 1 family protein				sigLowFC
TGME49_321560	-1.10729	9.12781	-4.40708	0.000840155	0.00513619	-0.863776	zinc knuckle domain-containing protein				sigLowFC
TGME49_297830	-1.28306	8.69284	-4.40572	0.000842166	0.00514107	-0.866215	hypothetical protein				sigLowFC
TGME49_258060	-0.770705	10.8301	-4.40187	0.0008479	0.00517213	-0.873138	ATP synthase subunit ATPTG8				sigLowFC
TGME49_219130	1.86879	9.28805	4.40132	0.000848726	0.00517322	-0.874131	NADPH-glutathione reductase				sigLowFC
TGME49_268685	1.03833	9.0968	4.39814	0.000853488	0.00519433	-0.879839	mitochondrial large subunit ribosomal protein				sigLowFC
TGME49_313270	-1.78853	9.72354	-4.39846	0.000853009	0.00519433	-0.879266	hypothetical protein				sigLowFC
TGME49_202840	-1.13987	11.6095	-4.39616	0.000856469	0.0052085	-0.883395	FHA domain-containing protein				sigLowFC
TGME49_305840	1.40368	7.8782	4.39146	0.000863595	0.00524785	-0.891847	Nicotinate-nucleotide adenylyltransferase				sigLowFC
TGME49_230170	1.76411	9.3831	4.38661	0.000871011	0.00526293	-0.900568	hypothetical protein				sigLowFC
TGME49_286260	-0.969183	9.05277	-4.38735	0.000869869	0.00526293	-0.899231	tetratricopeptide repeat-containing protein				sigLowFC
TGME49_300280	-0.970315	10.5434	-4.38549	0.000872729	0.00526733	-0.902578	LSM domain-containing protein				sigLowFC
TGME49_264640	-1.35013	11.1148	-4.38445	0.000874326	0.00527299	-0.904443	bromodomain-containing protein BDP2				sigLowFC
TGME49_218950	1.33674	8.45038	4.38177	0.00087847	0.00528592	-0.909265	hypothetical protein				sigLowFC
TGME49_268610	1.71959	8.39057	4.38256	0.000877256	0.00528592	-0.907855	hypothetical protein				sigLowFC
TGME49_289250	1.01549	10.3753	4.38136	0.000879115	0.00528592	-0.910014	cyclophilin, putative				sigLowFC
TGME49_223125	0.981273	10.9674	4.37758	0.000884993	0.00530211	-0.91681	plastid ubiquitin-like protein PUBL				sigLowFC
TGME49_257680	-0.797502	12.1646	-4.3775	0.000885121	0.00530211	-0.916958	myosin light chain MLC1				sigLowFC
TGME49_264200	-0.754649	8.01492	-4.3775	0.000885116	0.00530211	-0.916952	hypothetical protein				sigLowFC
TGME49_313495	-0.784371	7.03943	-4.37898	0.000882808	0.00530211	-0.91429	THO complex subunit 2, putative				sigLowFC
TGME49_237190	-1.29265	7.26542	-4.374	0.000890596	0.00532708	-0.923247	hypothetical protein				sigLowFC
TGME49_298040	1.01075	9.79414	4.37398	0.000890623	0.00532708	-0.923277	hypothetical protein				sigLowFC
TGME49_200310	1.71184	9.60219	4.37344	0.000891483	0.00532824	-0.924262	hypothetical protein				sigLowFC
TGME49_310070	-0.986973	10.5736	-4.37049	0.000896126	0.00535199	-0.929559	apical annuli methyltransferase AAMT				sigLowFC
TGME49_219630	-1.54003	9.02785	-4.36965	0.000897466	0.005356	-0.931083	flavodoxin domain-containing protein				sigLowFC
TGME49_231160	-1.54536	9.82549	-4.36667	0.000902194	0.00537619	-0.936441	hypothetical protein				sigLowFC
TGME49_293440	1.23493	8.76491	4.36337	0.000907476	0.00540364	-0.942394	hypothetical protein				sigLowFC
TGME49_270610	1.58443	8.00315	4.36081	0.000911587	0.00542004	-0.947002	hypothetical protein				sigLowFC
TGME49_307060	-1.66607	1.64541	-4.35791	0.000916262	0.00543975	-0.952217	hypothetical protein				sigLowFC
TGME49_236030	1.48623	9.63923	4.35545	0.000920253	0.00545556	-0.956649	hypothetical protein				sigLowFC
TGME49_263550	1.71849	8.78982	4.35124	0.000927124	0.00549201	-0.964233	39S ribosomal protein L47, mitochondrial precursor, putative				sigLowFC
TGME49_205720	1.13063	8.54242	4.35028	0.000928709	0.00549732	-0.965974	Adenosine/AMP deaminase domain-containing protein				sigLowFC
TGME49_286640	1.31469	8.48558	4.3483	0.00093196	0.00551249	-0.969537	GTPase				sigLowFC
TGME49_202300	1.76439	9.47758	4.34549	0.0009366	0.00552767	-0.9746	inosine triphosphate pyrophosphatase, putative				sigLowFC
TGME49_209740	0.887554	9.35475	4.34169	0.000942909	0.00554708	-0.981444	hypothetical protein				sigLowFC
TGME49_278878	1.42498	9.78016	4.34186	0.000942638	0.00554708	-0.981152	GDA1/CD39 (nucleoside phosphatase) family protein				sigLowFC
TGME49_281480	-1.14171	7.69495	-4.34178	0.000942769	0.00554708	-0.981293	WD domain, G-beta repeat-containing protein				sigLowFC
TGME49_309140	-1.75316	9.07388	-4.34142	0.000943357	0.00554708	-0.981928	transducin beta-like protein TBL1				sigLowFC
TGME49_211710	1.2514	12.2222	4.34095	0.000944145	0.00554763	-0.982779	TB2/DP1, HVA22 family protein				sigLowFC
TGME49_216590	-0.949501	11.0466	-4.33933	0.000946852	0.0055513	-0.985698	HEAT repeat-containing protein				sigLowFC
TGME49_298060	1.50698	7.8436	4.33947	0.000946625	0.0055513	-0.985454	Toxoplasma gondii family C protein				sigLowFC
TGME49_293320	-1.0839	8.84896	-4.33887	0.000947627	0.00555177	-0.986532	hypothetical protein				sigLowFC
TGME49_218720	-1.30766	8.17767	-4.33751	0.000949911	0.00555975	-0.988986	calcium-dependent protein kinase CDPK6				sigLowFC
TGME49_262860	1.08692	8.43631	4.33635	0.00095186	0.00556365	-0.991076	ADP-ribosylation factor family protein 1, putative				sigLowFC
TGME49_270690	-0.710074	9.89462	-4.33601	0.000952436	0.00556365	-0.991692	dynamin-related protein DRPC				sigLowFC
TGME49_290720	-1.06136	10.8337	-4.32957	0.00096335	0.00561919	-1.00331	V-type proton ATPase subunit a2, putative				sigLowFC
TGME49_216435	1.14624	10.0799	4.32909	0.000964174	0.0056199	-1.00418	hypothetical protein				sigLowFC
TGME49_286550	1.18747	10.3375	4.3269	0.000967918	0.00562941	-1.00813	exosome complex component RRP43, putative				sigLowFC
TGME49_298980	1.30974	8.72444	4.32717	0.000967456	0.00562941	-1.00764	RNA pseudouridine synthase superfamily protein				sigLowFC
TGME49_257572	-1.71117	5.08771	-4.32544	0.000970422	0.00563648	-1.01076	hypothetical protein				sigLowFC
TGME49_305340	-1.76214	10.6273	-4.32537	0.000970544	0.00563648	-1.01089	ATPase MORC				sigLowFC
TGME49_253120	1.42103	9.49579	4.32316	0.000974346	0.00565036	-1.01487	mandelonitrile lyase, putative				sigLowFC
TGME49_268630	0.973761	9.30911	4.31841	0.000982573	0.00568981	-1.02344	YagE family protein				sigLowFC
TGME49_258920	0.803716	9.45886	4.31576	0.000987203	0.00571249	-1.02823	hypothetical protein				sigLowFC
TGME49_253540	-0.917407	8.78813	-4.31448	0.000989446	0.00572133	-1.03054	hypothetical protein				sigLowFC
TGME49_500268	1.80053	7.34064	4.312	0.000993803	0.00574237	-1.03502	hypothetical protein, conserved				sigLowFC
TGME49_310960	1.22828	10.7654	4.30507	0.00100608	0.0058091	-1.04753	vacuolar atp synthase subunit f, putative				sigLowFC
TGME49_296950	-1.15773	9.66107	-4.3038	0.00100836	0.00581807	-1.04984	hypothetical protein				sigLowFC
TGME49_318170	1.34717	10.012	4.29856	0.00101776	0.0058681	-1.0593	hypothetical protein				sigLowFC
TGME49_275990	-1.90107	8.8086	-4.29691	0.00102075	0.00587518	-1.06229	hypothetical protein				sigLowFC
TGME49_500011	0.972874	9.4541	4.29669	0.00102115	0.00587518	-1.06269	hypothetical protein, conserved				sigLowFC
TGME49_291900	1.1797	9.12925	4.29323	0.00102743	0.0059068	-1.06893	Ydr279p family (RNase H2 complex component) protein				sigLowFC
TGME49_213710	0.765875	9.0698	4.28836	0.00103636	0.00594958	-1.07774	WD domain, G-beta repeat-containing protein				sigLowFC
TGME49_277690	-0.993954	8.00089	-4.28836	0.00103635	0.00594958	-1.07773	hypothetical protein				sigLowFC
TGME49_226730	-0.89924	12.6128	-4.2856	0.00104144	0.00597015	-1.08272	aconitate hydratase ACN/IRP				sigLowFC
TGME49_314910	1.03286	10.8605	4.28566	0.00104133	0.00597015	-1.08262	starch binding domain-containing protein				sigLowFC
TGME49_273445	-1.43655	8.1644	-4.2835	0.00104534	0.00597539	-1.08653	iron-sulfur cluster assembly protein SufD				sigLowFC
TGME49_232640	1.81168	8.44398	4.28164	0.0010488	0.00598661	-1.0899	RNA 2'-phosphotransferase, Tpt1/KptA family protein				sigLowFC
TGME49_243760	1.0415	10.7293	4.2817	0.00104868	0.00598661	-1.08978	hypothetical protein				sigLowFC
TGME49_249720	-1.2008	10.125	-4.27747	0.00105658	0.00602246	-1.09743	ATP synthase F0 subunit 9, putative				sigLowFC
TGME49_288920	-1.41078	8.86947	-4.27669	0.00105805	0.0060265	-1.09884	ATP-binding cassette G family transporter ABCG96				sigLowFC
TGME49_222160	1.3645	12.7243	4.27623	0.00105891	0.00602713	-1.09967	aldehyde dehydrogenase				sigLowFC
TGME49_268800	-1.56925	6.14086	-4.27377	0.00106357	0.00604501	-1.10414	hypothetical protein				sigLowFC
TGME49_208440	1.17427	9.90733	4.27254	0.00106588	0.00605386	-1.10635	ATP synthase-associated protein				sigLowFC
TGME49_242260	-1.46352	8.38801	-4.27075	0.00106929	0.00606717	-1.1096	hypothetical protein				sigLowFC
TGME49_295760	0.902015	9.79682	4.27051	0.00106974	0.00606717	-1.11003	calcium-dependent protein kinase CDPK4A				sigLowFC
TGME49_300140	-1.52983	11.341	-4.26736	0.00107574	0.00609686	-1.11573	elongation factor 1-gamma, putative				sigLowFC
TGME49_239760	1.19851	11.0753	4.26604	0.00107826	0.00610685	-1.11812	ribosomal protein RPL22				sigLowFC
TGME49_224180	1.63621	6.64642	4.26499	0.00108028	0.00611394	-1.12002	BTB domain-containing protein				sigLowFC
TGME49_219300	-1.29416	7.8794	-4.25989	0.00109013	0.00616096	-1.12926	ran binding protein				sigLowFC
TGME49_254950	-1.70243	10.0922	-4.26024	0.00108944	0.00616096	-1.12862	RNA cap guanine-N2 methyltransferase				sigLowFC
TGME49_314850	-1.29374	8.42312	-4.25551	0.00109864	0.0062047	-1.13718	peptidase, M16 family potein				sigLowFC
TGME49_220870	0.930079	9.39684	4.25421	0.0011012	0.00620739	-1.13955	hypothetical protein				sigLowFC
TGME49_237450	-1.41033	6.31462	-4.25408	0.00110145	0.00620739	-1.13978	CAP domain-containing protein				sigLowFC
TGME49_275568	-1.14685	8.54127	-4.25299	0.00110359	0.00621506	-1.14175	GPI transamidase subunit PIG-U protein				sigLowFC
TGME49_225310	0.93913	10.6094	4.24943	0.0011106	0.00624728	-1.1482	ARF1-directed GTPase-activating protein, putative				sigLowFC
TGME49_306670	1.12017	12.8131	4.24929	0.00111087	0.00624728	-1.14845	cytochrome c oxidase subunit ApiCOX26				sigLowFC
TGME49_305270	-1.4066	7.84638	-4.246	0.0011174	0.0062752	-1.15442	hypothetical protein				sigLowFC
TGME49_244560	-0.976056	12.3256	-4.24477	0.00111984	0.00628448	-1.15664	heat shock protein 90, putative				sigLowFC
TGME49_209140	-1.36309	8.25338	-4.23961	0.00113018	0.0063259	-1.166	anti-silencing protein, ASF1 family protein				sigLowFC
TGME49_225110	-1.95623	9.18123	-4.23949	0.00113042	0.0063259	-1.16622	AP2 domain transcription factor AP2X-2				sigLowFC
TGME49_237830	-1.35779	8.96318	-4.23912	0.00113118	0.0063259	-1.1669	DNA polymerase I domain-containing protein				sigLowFC
TGME49_286530	1.10645	12.2101	4.24014	0.00112913	0.0063259	-1.16505	cytochrome c oxidase subunit ApiCOX24				sigLowFC
TGME49_297220	1.23247	9.26864	4.24061	0.00112817	0.0063259	-1.16418	acyl-CoA synthetase ACS1				sigLowFC
TGME49_218210	1.65028	7.23479	4.23698	0.00113549	0.00634113	-1.17077	Chromosome-associated kinesin KLP1, putative				sigLowFC
TGME49_215710	-1.69642	8.25715	-4.23623	0.00113701	0.00634519	-1.17213	hypothetical protein				sigLowFC
TGME49_233710	-0.875427	10.2639	-4.23327	0.00114303	0.00637432	-1.1775	inorganic anion transporter, sulfate permease (SulP) family protein				sigLowFC
TGME49_267590	-0.846449	8.89375	-4.23275	0.00114408	0.00637578	-1.17844	hypothetical protein				sigLowFC
TGME49_222850	1.33275	10.2741	4.23201	0.00114559	0.00637973	-1.17978	stress responsive a/b barrel domain-containing protein				sigLowFC
TGME49_245600	1.89264	9.84951	4.23137	0.00114689	0.00638252	-1.18094	hypothetical protein				sigLowFC
TGME49_280670	-1.06932	8.2008	-4.22628	0.00115734	0.00643621	-1.19017	hypothetical protein				sigLowFC
TGME49_272290	-1.67637	8.55582	-4.22445	0.00116112	0.00644825	-1.19349	pyruvate dehydrogenase complex subunit PD-HE1Beta				sigLowFC
TGME49_280530	1.52927	7.40798	4.22481	0.00116038	0.00644825	-1.19284	hypothetical protein				sigLowFC
TGME49_265360	1.35952	8.0347	4.22196	0.00116629	0.00647245	-1.19801	hypothetical protein				sigLowFC
TGME49_297340	1.70697	9.40222	4.21784	0.0011749	0.0065157	-1.20549	hypothetical protein				sigLowFC
TGME49_268910	1.34779	9.16434	4.20854	0.00119454	0.00661549	-1.22237	signal peptidase I protein				sigLowFC
TGME49_211670	0.909143	10.4517	4.20717	0.00119746	0.00662509	-1.22485	S1 RNA binding domain-containing protein				sigLowFC
TGME49_238180	-0.616516	11.1317	-4.20695	0.00119793	0.00662509	-1.22525	26S proteasome regulatory subunit RPN7, putative				sigLowFC
TGME49_313070	-0.677939	9.87053	-4.20376	0.00120476	0.00665365	-1.23104	hypothetical protein				sigLowFC
TGME49_313040	0.827892	9.17781	4.19995	0.00121299	0.00669449	-1.23797	hypothetical protein				sigLowFC
TGME49_209300	1.75117	8.68412	4.19778	0.00121769	0.00671115	-1.2419	WD domain, G-beta repeat-containing protein				sigLowFC
TGME49_254650	1.03028	9.84799	4.19809	0.00121703	0.00671115	-1.24135	pre-mRNA-splicing factor Cwc2, putative				sigLowFC
TGME49_234530	1.22514	10.3424	4.19161	0.0012312	0.00677624	-1.25312	hypothetical protein				sigLowFC
TGME49_253820	1.51831	11.1779	4.19198	0.00123038	0.00677624	-1.25244	hypothetical protein				sigLowFC
TGME49_203080	1.24882	9.76019	4.18883	0.00123731	0.00680523	-1.25816	RNA recognition motif-containing protein				sigLowFC
TGME49_252630	1.44761	11.4512	4.18842	0.00123823	0.00680557	-1.25891	succinate dehydrogenase subunit SDH15				sigLowFC
TGME49_228180	0.769738	9.17138	4.18585	0.00124393	0.00682754	-1.26359	cytochrome C oxidase assembly factor COX15, putative				sigLowFC
TGME49_224800	-1.63952	9.04754	-4.18489	0.00124606	0.00683451	-1.26533	hypothetical protein				sigLowFC
TGME49_253650	0.7396	11.4898	4.18317	0.00124989	0.00684147	-1.26845	DnaJ C terminal region domain-containing protein				sigLowFC
TGME49_268680	1.03225	9.37795	4.18371	0.0012487	0.00684147	-1.26748	hypothetical protein				sigLowFC
TGME49_229950	-0.68078	10.8489	-4.18208	0.00125233	0.00684554	-1.27043	26S proteasome regulatory subunit 6b, putative				sigLowFC
TGME49_320690	0.803764	9.46652	4.18208	0.00125235	0.00684554	-1.27045	gamma-soluble NSF attachment protein, putative				sigLowFC
TGME49_311860	-1.46456	8.88054	-4.18115	0.00125443	0.00685225	-1.27214	DUF789 domain-containing protein				sigLowFC
TGME49_285445	1.82033	8.36289	4.17868	0.00125997	0.00686843	-1.27662	cullin, putative				sigLowFC
TGME49_268340	-1.98131	6.69865	-4.17561	0.0012669	0.0068968	-1.2822	glycosyltransferase family 28 C-terminal domain-containing protein				sigLowFC
TGME49_217030	1.10403	9.10393	4.17146	0.00127635	0.00694352	-1.28976	hypothetical protein				sigLowFC
TGME49_219290	-1.26242	8.87187	-4.16997	0.00127974	0.00695724	-1.29246	F-actin-capping protein subunit beta, putative				sigLowFC
TGME49_313560	-0.806044	10.0483	-4.16942	0.00128101	0.0069594	-1.29346	60S ribosomal protein L7a, putative				sigLowFC
TGME49_305090	1.23508	8.49267	4.16839	0.00128337	0.0069675	-1.29534	kinase binding protein cgi-121 protein				sigLowFC
TGME49_209210	-1.34418	10.2526	-4.1624	0.0012972	0.00703304	-1.30624	KH domain-containing protein				sigLowFC
TGME49_254910	-1.77219	12.1943	-4.16076	0.00130102	0.00704895	-1.30922	hypothetical protein				sigLowFC
TGME49_285895	-1.34933	9.86151	-4.16014	0.00130246	0.00705196	-1.31035	AP2 domain transcription factor AP2V-2				sigLowFC
TGME49_218930	-1.58264	8.10367	-4.1585	0.00130628	0.00706786	-1.31333	BTB/POZ domain-containing protein				sigLowFC
TGME49_288890	-1.59752	8.78781	-4.15391	0.00131706	0.00711222	-1.32169	hypothetical protein				sigLowFC
TGME49_204280	-0.956752	9.56348	-4.15317	0.00131881	0.00711643	-1.32304	cell-cycle-associated protein kinase DYRK1				sigLowFC
TGME49_226020	1.49183	11.1771	4.15092	0.00132414	0.00714038	-1.32714	transporter, major facilitator family protein				sigLowFC
TGME49_256010	1.08365	9.83173	4.14904	0.0013286	0.00715955	-1.33055	hypothetical protein				sigLowFC
TGME49_260270	-1.24944	8.8691	-4.14503	0.00133818	0.00719773	-1.33786	HEAT repeat-containing protein				sigLowFC
TGME49_264000	1.11814	11.0496	4.14457	0.00133928	0.00719773	-1.3387	aldehyde dehydrogenase				sigLowFC
TGME49_318525	1.99259	9.85783	4.14465	0.0013391	0.00719773	-1.33856	hypothetical protein				sigLowFC
TGME49_204410	-1.26317	8.13759	-4.14274	0.00134367	0.00721165	-1.34202	endonuclease/exonuclease/phosphatase family protein				sigLowFC
TGME49_287180	-0.885378	9.00191	-4.13771	0.00135584	0.00727207	-1.35119	DNA polymerase V, putative				sigLowFC
TGME49_261540	1.02094	8.25295	4.13549	0.00136124	0.00729612	-1.35523	DNA-directed RNA polymerase I RPAC2				sigLowFC
TGME49_285870	-1.74439	7.05611	-4.13479	0.00136295	0.00730043	-1.35651	SAG-related sequence SRS20A				sigLowFC
TGME49_288460	-0.977062	10.4733	-4.13372	0.00136556	0.00730951	-1.35845	hypothetical protein				sigLowFC
TGME49_272570	1.21079	8.65233	4.12801	0.00137962	0.00736697	-1.36886	dihydrouridine synthase (dus) protein				sigLowFC
TGME49_205410	1.50566	7.96056	4.12662	0.00138306	0.0073732	-1.37139	RNA pseudouridine synthase superfamily protein				sigLowFC
TGME49_249390	-0.977745	12.9467	-4.12656	0.00138323	0.0073732	-1.37151	glutamate/leucine/phenylalanine/valine dehydrogenase family protein				sigLowFC
TGME49_500023	-1.34764	8.635	-4.12628	0.00138391	0.0073732	-1.37202	hypothetical protein, conserved				sigLowFC
TGME49_315700	-1.64616	8.36237	-4.12491	0.00138733	0.00738208	-1.37452	hypothetical protein				sigLowFC
TGME49_208970	0.808554	11.4168	4.12415	0.0013892	0.00738661	-1.37589	RNA recognition motif-containing protein				sigLowFC
TGME49_225930	1.05677	12.0006	4.12182	0.00139502	0.0074077	-1.38014	triose-phosphate isomerase TPI-I				sigLowFC
TGME49_500422	-1.84941	10.1786	-4.12193	0.00139476	0.0074077	-1.37995	RNA-dependent RNA polymerase, putative				sigLowFC
TGME49_316310	1.49474	10.2361	4.11942	0.00140105	0.00743476	-1.38452	superoxide dismutase SOD1				sigLowFC
TGME49_234950	1.69445	7.58773	4.11854	0.00140326	0.00744156	-1.38613	protein kinase (incomplete catalytic triad)				sigLowFC
TGME49_320100	0.999924	11.1208	4.11699	0.00140718	0.00745738	-1.38896	RNA recognition motif-containing protein				sigLowFC
TGME49_249670	0.997959	12.3426	4.11347	0.0014161	0.00749475	-1.39538	cathepsin B				sigLowFC
TGME49_299210	-1.5379	9.06586	-4.11366	0.0014156	0.00749475	-1.39502	CTP synthase				sigLowFC
TGME49_264740	1.3891	10.3427	4.11075	0.00142303	0.00752146	-1.40034	hypothetical protein				sigLowFC
TGME49_226280	1.42224	9.74841	4.10397	0.00144045	0.00760348	-1.4127	ribosomal protein L28, putative				sigLowFC
TGME49_221690	-1.11748	8.61577	-4.10173	0.00144625	0.00762904	-1.41679	hypothetical protein				sigLowFC
TGME49_205170	-1.18428	8.64848	-4.10066	0.00144903	0.00763869	-1.41874	hypothetical protein				sigLowFC
TGME49_216130	0.869317	11.0541	4.09538	0.00146286	0.00768624	-1.42839	ubiquitin conjugating enzyme E2, putative				sigLowFC
TGME49_219310	-1.31677	10.5965	-4.09567	0.0014621	0.00768624	-1.42786	DnaK family protein				sigLowFC
TGME49_292140	-1.04667	10.0064	-4.09604	0.00146112	0.00768624	-1.42718	NIMA-related protein kinase NIMA1				sigLowFC
TGME49_307605	1.33023	10.0138	4.09564	0.00146216	0.00768624	-1.4279	hypothetical protein				sigLowFC
TGME49_232830	0.770437	11.9709	4.09358	0.0014676	0.00770612	-1.43168	V-type proton ATPase subunit a1				sigLowFC
TGME49_265500	-1.89205	8.55079	-4.09296	0.00146921	0.00770952	-1.43279	chloride transporter, chloride channel (ClC) family protein				sigLowFC
TGME49_286090	1.35072	12.9953	4.09205	0.00147162	0.00771708	-1.43445	translation initiation factor SUI1, putative				sigLowFC
TGME49_218870	1.25335	9.22774	4.09109	0.00147418	0.00772491	-1.43622	TBC domain-containing protein TBC3				sigLowFC
TGME49_238020	-0.809218	9.82684	-4.09023	0.00147645	0.00772719	-1.43778	hypothetical protein				sigLowFC
TGME49_223690	0.934453	10.2347	4.08829	0.00148162	0.00774413	-1.44133	hypothetical protein				sigLowFC
TGME49_309380	-1.40014	9.3057	-4.08786	0.00148276	0.00774504	-1.44212	kinetochore protein NUF2				sigLowFC
TGME49_228670	-1.35048	8.63504	-4.086	0.00148772	0.00776588	-1.44551	zinc finger, C2H2 type domain-containing protein				sigLowFC
TGME49_270800	-1.88454	9.26229	-4.08534	0.00148948	0.00776996	-1.4467	GAF domain-containing protein				sigLowFC
TGME49_231992	1.89193	3.52773	4.08439	0.00149203	0.00777647	-1.44844	hypothetical protein				sigLowFC
TGME49_239610	0.870198	9.40919	4.08415	0.00149267	0.00777647	-1.44888	hypothetical protein				sigLowFC
TGME49_270120	1.23164	10.4331	4.08122	0.00150056	0.00781247	-1.45423	thioredoxin-like protein TLP1				sigLowFC
TGME49_230380	-0.836256	12.5529	-4.0795	0.00150522	0.00782655	-1.45738	protein translocation complex, SEC61 gamma subunit				sigLowFC
TGME49_266280	-0.860199	10.0784	-4.07595	0.00151484	0.00786637	-1.46386	AP-4 complex subunit beta, putative				sigLowFC
TGME49_202610	-0.95305	10.5034	-4.07548	0.00151615	0.00786805	-1.46473	protein phosphatase PPM3D				sigLowFC
TGME49_279430	1.3256	9.69532	4.07371	0.00152098	0.00788796	-1.46796	cwf18 pre-mRNA splicing factor protein				sigLowFC
TGME49_205240	-0.753582	10.3606	-4.07159	0.00152678	0.0079027	-1.47183	cleft lip and palate transmembrane protein 1 (clptm1) protein				sigLowFC
TGME49_256820	-0.82132	8.53577	-4.06845	0.00153545	0.00794242	-1.47758	zinc finger (CCCH type) motif-containing protein				sigLowFC
TGME49_267725	0.892005	7.94453	4.06623	0.00154158	0.00796899	-1.48162	hypothetical protein				sigLowFC
TGME49_288020	1.95655	7.46075	4.06231	0.00155251	0.00802032	-1.4888	hypothetical protein				sigLowFC
TGME49_229140	-1.50698	9.55348	-4.05326	0.00157802	0.00813632	-1.50534	MaoC family domain-containing protein				sigLowFC
TGME49_218410	-1.08022	12.1936	-4.05158	0.00158279	0.00815564	-1.5084	ribosomal protein RPP0				sigLowFC
TGME49_219370	1.54517	9.10887	4.05078	0.00158509	0.00815877	-1.50988	hypothetical protein				sigLowFC
TGME49_273310	1.37463	8.83231	4.05065	0.00158544	0.00815877	-1.5101	hypothetical protein				sigLowFC
TGME49_253420	0.685783	10.2696	4.04964	0.00158834	0.00816571	-1.51196	PQ loop repeat-containing protein				sigLowFC
TGME49_261490	-1.16922	8.61297	-4.04947	0.00158883	0.00816571	-1.51227	hypothetical protein				sigLowFC
TGME49_215170	-0.725229	11.0104	-4.04719	0.00159538	0.00818884	-1.51644	serine/threonine-protein phosphatase 2A catalytic subunit beta isoform, putative				sigLowFC
TGME49_241860	-1.42976	8.49034	-4.0468	0.00159649	0.0081893	-1.51715	N-acetylglucosaminyl-phosphatidylinositol biosynthetic protein PigA, family GT4 protein				sigLowFC
TGME49_218560	-1.39801	10.8263	-4.04431	0.00160367	0.00820511	-1.52171	acetyl-coA carboxylase ACC2				sigLowFC
TGME49_225990	-1.51083	8.67399	-4.04434	0.00160357	0.00820511	-1.52164	acyl transferase domain-containing protein				sigLowFC
TGME49_254720	-1.68241	6.58881	-4.04443	0.00160333	0.00820511	-1.5215	dense granule protein GRA8	GRA8	Sporulated		sigLowFC
TGME49_270060	-1.22562	9.78262	-4.045	0.00160169	0.00820511	-1.52045	hypothetical protein				sigLowFC
TGME49_266400	-1.56868	7.89582	-4.04139	0.00161213	0.00823784	-1.52705	hypothetical protein				sigLowFC
TGME49_215390	1.7296	8.44185	4.0408	0.00161384	0.00824129	-1.52812	TIM10 family protein, putative				sigLowFC
TGME49_206460	1.50684	7.62144	4.03816	0.00162155	0.00827014	-1.53296	hypothetical protein				sigLowFC
TGME49_214770	-0.719926	11.5866	-4.0347	0.00163169	0.00831653	-1.53929	ras-related protein RAB1B				sigLowFC
TGME49_207430	-0.614234	9.37705	-4.03317	0.00163619	0.00832886	-1.54209	ATP-dependent RNA helicase DDX1, putative				sigLowFC
TGME49_251770	-1.5681	10.6848	-4.02754	0.0016529	0.00840855	-1.55239	hypothetical protein				sigLowFC
TGME49_202730	-1.30266	8.88766	-4.02714	0.0016541	0.00840931	-1.55313	hypothetical protein				sigLowFC
TGME49_231590	-1.3899	10.5191	-4.02478	0.00166117	0.00843986	-1.55746	SGS domain-containing protein				sigLowFC
TGME49_263330	0.765101	8.48898	4.02367	0.00166448	0.00845132	-1.55948	Adaptin ear-binding coat-associated protein 2 (NECAP-2) isoform 2 family protein				sigLowFC
TGME49_263610	-1.32664	10.1909	-4.0232	0.0016659	0.00845317	-1.56034	tetratricopeptide repeat-containing protein				sigLowFC
TGME49_225000	-1.41664	9.15831	-4.02267	0.00166749	0.00845589	-1.56131	hypothetical protein				sigLowFC
TGME49_225270	-1.23977	9.1936	-4.02027	0.00167474	0.00848727	-1.56571	hypothetical protein				sigLowFC
TGME49_268200	-0.812562	12.6141	-4.01932	0.00167762	0.00849645	-1.56745	RNA recognition motif-containing protein				sigLowFC
TGME49_223590	-0.837907	10.9074	-4.01795	0.00168177	0.00851209	-1.56996	proteasome subunit beta type-6, putative				sigLowFC
TGME49_213930	-0.918215	8.67944	-4.01408	0.00169356	0.00855553	-1.57705	exosome complex component RRP45, putative				sigLowFC
TGME49_277530	-1.57673	7.56897	-4.0141	0.00169348	0.00855553	-1.577	DNA topoisomerase domain-containing protein				sigLowFC
TGME49_216700	-1.83738	7.55841	-4.0121	0.00169962	0.00858074	-1.58068	peptide deformylase, putative				sigLowFC
TGME49_294630	-0.821985	9.7567	-4.00452	0.00172304	0.00869346	-1.59456	PH domain-containing protein, putative				sigLowFC
TGME49_260510	1.15635	10.2243	4.0035	0.00172622	0.00870404	-1.59643	OTU domain-containing protein OTUB1				sigLowFC
TGME49_203320	-1.4135	9.72647	-4.00227	0.00173005	0.00870632	-1.59868	zinc finger in N-recognin protein				sigLowFC
TGME49_232060	-1.18405	6.66434	-4.00161	0.00173212	0.00870632	-1.59989	hypothetical protein				sigLowFC
TGME49_310300	-1.26982	8.16168	-4.00163	0.00173205	0.00870632	-1.59985	hypothetical protein				sigLowFC
TGME49_272420	0.648361	10.826	4.00024	0.00173643	0.00872248	-1.60241	phosphatidylcholine-sterol acyltransferase				sigLowFC
TGME49_297230	-1.14892	8.50453	-3.99768	0.00174446	0.00875185	-1.60709	vacuolar protein sorting-associated protein 53				sigLowFC
TGME49_312190	-1.2111	8.25774	-3.99636	0.00174865	0.00876737	-1.60952	hypothetical protein				sigLowFC
TGME49_260380	-0.830642	10.7061	-3.98875	0.00177286	0.0088832	-1.62347	hypothetical protein				sigLowFC
TGME49_218770	0.961326	8.17467	3.98721	0.00177779	0.00889487	-1.62628	carrier superfamily protein				sigLowFC
TGME49_240810	-1.39682	10.4949	-3.98705	0.00177831	0.00889487	-1.62658	apicomplexan amino acid transporter ApiAT6-1				sigLowFC
TGME49_259710	0.999238	11.3787	3.98692	0.00177875	0.00889487	-1.62683	EF hand domain-containing protein				sigLowFC
TGME49_207990	-1.41227	8.26161	-3.98424	0.00178738	0.00892797	-1.63174	ribosomal RNA large subunit methyltransferase J protein				sigLowFC
TGME49_226810	-0.911611	9.14352	-3.97849	0.00180606	0.00901529	-1.64228	histone lysine methyltransferase SET1				sigLowFC
TGME49_202630	-0.850843	10.5563	-3.97516	0.00181698	0.0090532	-1.64839	ATP-dependent metallopeptidase HflB subfamily protein				sigLowFC
TGME49_234350	-0.938564	5.91287	-3.9738	0.00182146	0.00906989	-1.65089	hypothetical protein				sigLowFC
TGME49_310060	1.04528	9.46019	3.97301	0.00182404	0.00907145	-1.65232	small nuclease				sigLowFC
TGME49_225360	0.838032	8.6626	3.97132	0.00182965	0.00909368	-1.65543	hypothetical protein				sigLowFC
TGME49_214100	0.725071	9.00602	3.9692	0.00183668	0.0091201	-1.65932	hypothetical protein				sigLowFC
TGME49_230610	1.03085	9.53055	3.96903	0.00183725	0.0091201	-1.65963	transmembrane protein TMEM222				sigLowFC
TGME49_216040	-1.02739	8.57487	-3.96776	0.00184148	0.00912289	-1.66197	30S ribosomal protein S15, putative				sigLowFC
TGME49_265280	0.894281	10.2905	3.96681	0.00184466	0.00912289	-1.66371	hypothetical protein				sigLowFC
TGME49_269670	1.1786	10.1605	3.96692	0.00184428	0.00912289	-1.6635	hypothetical protein				sigLowFC
TGME49_278530	1.28848	11.6209	3.9684	0.00183934	0.00912289	-1.66079	multiprotein bridging factor type 1 family transcriptional co-activator, putative				sigLowFC
TGME49_500015	-1.727	6.14678	-3.96766	0.00184181	0.00912289	-1.66215	hypothetical protein, conserved				sigLowFC
TGME49_305330	-0.992632	9.76659	-3.96381	0.00185469	0.00916683	-1.66921	cyclin, N-terminal domain-containing protein				sigLowFC
TGME49_305930	1.40222	9.20415	3.9621	0.00186043	0.00917818	-1.67234	IMC sutures component ISC4				sigLowFC
TGME49_232090	-1.64272	9.1439	-3.96102	0.00186408	0.00919052	-1.67433	3-hydroxyacyl-CoA dehydrogenase, NAD binding domain-containing protein				sigLowFC
TGME49_290678	-1.25092	9.1773	-3.96006	0.00186733	0.00920087	-1.67609	hypothetical protein				sigLowFC
TGME49_227870	-0.731821	10.5103	-3.95653	0.00187931	0.00925422	-1.68258	Tim10/DDP family zinc finger superfamily protein				sigLowFC
TGME49_226900	-0.752446	9.64092	-3.95561	0.00188243	0.00925863	-1.68426	hypothetical protein				sigLowFC
TGME49_262480	1.29512	10.3262	3.95532	0.00188343	0.00925863	-1.6848	dynein light chain roadblock-type 2, putative				sigLowFC
TGME49_278830	-1.08245	11.2199	-3.95491	0.00188484	0.00925863	-1.68555	glucose-6-phosphate 1-dehydrogenase				sigLowFC
TGME49_316620	-1.10741	8.66682	-3.95334	0.00189021	0.00927931	-1.68844	cell division cycle protein CDC20, putative				sigLowFC
TGME49_259090	-0.696594	9.81556	-3.95126	0.00189732	0.0093085	-1.69224	ubiquitin-conjugating enzyme subfamily protein				sigLowFC
TGME49_500107	1.35014	8.39854	3.9503	0.00190062	0.00931899	-1.69401	hypothetical protein, conserved				sigLowFC
TGME49_309780	1.17193	8.77076	3.94717	0.00191145	0.00936631	-1.69976	hypothetical protein				sigLowFC
TGME49_210750	1.05905	9.76799	3.94198	0.00192951	0.00944327	-1.70929	Ferredoxin-fold anticodon binding domain-containing protein				sigLowFC
TGME49_233160	-1.09062	9.81781	-3.94159	0.00193089	0.00944423	-1.71001	hypothetical protein				sigLowFC
TGME49_201680	-0.863963	10.4149	-3.9393	0.00193892	0.00946036	-1.71422	eukaryotic initiation factor-3 subunit 10, putative				sigLowFC
TGME49_320150	1.37299	3.75858	3.9399	0.00193679	0.00946036	-1.71311	elongation factor Tu GTP binding domain-containing protein				sigLowFC
TGME49_305870	0.988468	9.49546	3.93884	0.00194052	0.00946238	-1.71505	DAD family protein				sigLowFC
TGME49_205030	0.850159	10.147	3.93808	0.0019432	0.00946393	-1.71645	protein transport protein BET1, putative				sigLowFC
TGME49_240440	1.01342	10.0045	3.93694	0.00194722	0.00947776	-1.71855	hypothetical protein				sigLowFC
TGME49_290920	-1.5578	8.51887	-3.93599	0.00195057	0.00948827	-1.72029	oxidoreductase, 2OG-Fe(II) oxygenase family protein				sigLowFC
TGME49_209150	-1.21045	10.1252	-3.93506	0.00195388	0.0094986	-1.72201	non-proton pumping type-II NADH dehydrogenase I				sigLowFC
TGME49_215590	-1.25262	9.53586	-3.93386	0.00195813	0.00951348	-1.72421	flavoprotein subunit of succinate dehydrogenase SDHA				sigLowFC
TGME49_226960	-1.30076	10.8213	-3.93194	0.00196495	0.00954078	-1.72773	phosphofructokinase PFKII				sigLowFC
TGME49_287515	1.14735	7.92824	3.92976	0.00197273	0.00957279	-1.73173	hypothetical protein				sigLowFC
TGME49_215920	-1.22347	8.17766	-3.92657	0.00198421	0.0096109	-1.73761	hypothetical protein				sigLowFC
TGME49_230100	-0.756545	9.52722	-3.92624	0.00198539	0.0096109	-1.73821	ER membrane protein complex subunit 3, putative				sigLowFC
TGME49_249770	1.08059	9.68837	3.92644	0.00198466	0.0096109	-1.73784	Nmda1 protein				sigLowFC
TGME49_276940	1.67256	12.342	3.92553	0.00198794	0.00961256	-1.73951	ribosome associated membrane protein RAMP4, putative				sigLowFC
TGME49_307990	1.04551	9.60751	3.92514	0.00198934	0.00961256	-1.74023	arrestin (or s-antigen), n-terminal domain-containing protein				sigLowFC
TGME49_256030	-0.89477	10.4885	-3.92269	0.00199821	0.00964957	-1.74473	doublecortin domain-containing protein DCX				sigLowFC
TGME49_500138	-1.75764	5.56392	-3.91981	0.0020087	0.00967685	-1.75003	hypothetical protein				sigLowFC
TGME49_309240	-1.28056	8.22106	-3.91942	0.00201012	0.00967785	-1.75075	CorA family Mg2+ transporter protein				sigLowFC
TGME49_217910	-1.41325	10.0613	-3.91353	0.00203172	0.009776	-1.76158	DNA polymerase (pol2) superfamily protein				sigLowFC
TGME49_249260	-1.75848	8.43031	-3.91213	0.00203688	0.0097949	-1.76414	CDK-related protein kinase CRK3				sigLowFC
TGME49_258740	-0.790162	9.60574	-3.91066	0.00204233	0.0098093	-1.76685	eukaryotic initiation factor-2A, putative				sigLowFC
TGME49_266366	-1.20688	12.2599	-3.90782	0.00205291	0.00985422	-1.77208	BT1 family protein				sigLowFC
TGME49_321310	1.35061	7.09837	3.90642	0.00205813	0.00987336	-1.77465	16S rRNA processing protein RimM domain-containing protein				sigLowFC
TGME49_225730	1.07911	10.8769	3.90588	0.00206014	0.00987704	-1.77564	ATP synthase-associated protein				sigLowFC
TGME49_213746	1.30469	8.88221	3.90392	0.00206749	0.00990637	-1.77925	hypothetical protein				sigLowFC
TGME49_280400	-1.23072	8.07038	-3.90065	0.00207982	0.00995948	-1.78527	Dpy-19-like C-mannosyltransferase				sigLowFC
TGME49_249480	-1.18791	9.73662	-3.89463	0.00210267	0.0100629	-1.79633	co-chaperone UNC				sigLowFC
TGME49_293840	1.6538	6.30769	3.89416	0.00210449	0.0100656	-1.7972	EF hand domain-containing protein				sigLowFC
TGME49_318570	-0.676821	11.2411	-3.89083	0.00211726	0.0101206	-1.80333	SFT2 family protein				sigLowFC
TGME49_311040	1.30239	10.8061	3.89021	0.00211965	0.010126	-1.80447	hypothetical protein				sigLowFC
TGME49_275320	1.39694	9.93527	3.88807	0.0021279	0.0101593	-1.8084	penicillin amidase				sigLowFC
TGME49_220150	0.900144	9.83131	3.8864	0.00213439	0.0101754	-1.81149	50S ribosomal protein L16, putative				sigLowFC
TGME49_309580	1.10327	8.02622	3.88622	0.00213509	0.0101754	-1.81182	transporter, major facilitator family protein				sigLowFC
TGME49_313200	-0.937769	7.89376	-3.88682	0.00213275	0.0101754	-1.8107	F-Box Protein L2				sigLowFC
TGME49_257440	1.48936	7.72786	3.884	0.00214372	0.0101983	-1.8159	SCO1/SenC protein				sigLowFC
TGME49_312990	1.42941	8.7813	3.8828	0.00214841	0.0102145	-1.81811	DEAD/DEAH box ATP-dependent RNA helicase				sigLowFC
TGME49_288600	1.05111	9.80423	3.88205	0.00215134	0.0102224	-1.81949	ATG18/WIPI-like protein PROP1				sigLowFC
TGME49_219440	-1.59533	8.65731	-3.8808	0.00215624	0.0102396	-1.82179	hypothetical protein				sigLowFC
TGME49_202250	-1.08445	9.31979	-3.8799	0.00215975	0.0102501	-1.82344	hypothetical protein				sigLowFC
TGME49_213670	-0.587707	9.02415	-3.87926	0.00216227	0.0102561	-1.82462	MIC60 domain-containing protein				sigLowFC
TGME49_281950	0.758297	10.1965	3.87475	0.00218007	0.0103282	-1.83292	membrane protein, putative				sigLowFC
TGME49_213460	1.84886	10.4424	3.8706	0.00219662	0.0103943	-1.84057	hypothetical protein				sigLowFC
TGME49_269210	-1.77825	8.08232	-3.86955	0.00220081	0.010408	-1.8425	hypothetical protein				sigLowFC
TGME49_253440	-0.768614	12.2024	-3.86677	0.00221196	0.0104484	-1.84761	cell-cycle-associated protein kinase SRPK, putative				sigLowFC
TGME49_500352	1.32242	6.93417	3.86707	0.00221077	0.0104484	-1.84706	hypothetical protein, conserved				sigLowFC
TGME49_244390	0.799772	11.3455	3.86488	0.00221958	0.010472	-1.85109	coatomer epsilon subunit protein				sigLowFC
TGME49_319860	-0.936453	9.01355	-3.86518	0.00221836	0.010472	-1.85053	DNA polymerase family B protein				sigLowFC
TGME49_209690	1.04724	9.28304	3.86435	0.00222175	0.010476	-1.85208	small nuclear ribonucleoprotein				sigLowFC
TGME49_206640	0.87619	10.4215	3.86366	0.00222451	0.0104829	-1.85333	hypothetical protein				sigLowFC
TGME49_278550	-0.996434	8.34386	-3.86291	0.00222756	0.0104911	-1.85472	elongation factor Tu GTP binding domain-containing protein				sigLowFC
TGME49_316510	1.12091	8.35804	3.86258	0.0022289	0.0104912	-1.85533	zinc finger (CCCH type) motif-containing protein				sigLowFC
TGME49_254690	0.760631	10.9263	3.86129	0.00223414	0.0104973	-1.8577	serine hydrolase ASH2				sigLowFC
TGME49_261670	-1.03341	7.97439	-3.86176	0.00223223	0.0104973	-1.85684	ribonuclease H1/H2 small subunit protein				sigLowFC
TGME49_315720	-1.90511	8.33157	-3.85653	0.0022536	0.0105825	-1.86648	Smg-4/UPF3 family protein				sigLowFC
TGME49_246450	1.42789	9.17361	3.85501	0.00225986	0.0105984	-1.86928	hypothetical protein				sigLowFC
TGME49_314418	-0.749444	10.4692	-3.85472	0.00226102	0.0105984	-1.8698	AP-4 complex subunit sigma, putative				sigLowFC
TGME49_261370	-1.01664	8.26103	-3.85378	0.00226492	0.0105993	-1.87154	F-box domain-containing protein				sigLowFC
TGME49_311000	1.10898	8.69807	3.85314	0.00226755	0.0105994	-1.87272	hypothetical protein				sigLowFC
TGME49_307820	0.866423	8.86715	3.84944	0.00228289	0.0106552	-1.87954	hypothetical protein				sigLowFC
TGME49_250850	-0.923411	8.77887	-3.84767	0.00229027	0.0106733	-1.8828	CMGC kinase, putative				sigLowFC
TGME49_253430	-0.938484	11.7151	-3.84706	0.00229281	0.0106746	-1.88392	asparagine synthetase, putative				sigLowFC
TGME49_305290	0.939628	10.4252	3.84664	0.00229458	0.0106746	-1.8847	vacuolar atp synthase subunit e, putative				sigLowFC
TGME49_263510	-1.10582	7.96569	-3.84297	0.00230995	0.0107399	-1.89146	Spc97 / Spc98 family protein				sigLowFC
TGME49_202950	-1.33566	9.85059	-3.84181	0.00231483	0.0107564	-1.89359	hypothetical protein				sigLowFC
TGME49_293540	-0.904287	7.56473	-3.84	0.0023225	0.0107673	-1.89694	hypothetical protein				sigLowFC
TGME49_321600	-1.3146	8.70522	-3.83998	0.00232257	0.0107673	-1.89696	hypothetical protein				sigLowFC
TGME49_272530	0.872478	8.50457	3.83816	0.00233029	0.0107968	-1.90032	hypothetical protein				sigLowFC
TGME49_306310	-0.741049	10.027	-3.83674	0.00233634	0.0108186	-1.90294	structural maintenance of chromosomes protein SMC3, putative				sigLowFC
TGME49_320630	-0.716303	10.9569	-3.83232	0.00235524	0.0108935	-1.91109	phosphotransferase enzyme family protein				sigLowFC
TGME49_319930	-0.811808	9.53597	-3.83194	0.00235685	0.0108946	-1.91178	serine/threonine protein phosphatase 6 regulatory subunit PP6R				sigLowFC
TGME49_304710	-0.63448	11.5725	-3.82846	0.00237189	0.0109578	-1.91821	eukaryotic peptide chain release factor, putative				sigLowFC
TGME49_238930	0.994022	7.69694	3.82656	0.00238011	0.0109835	-1.92171	hypothetical protein				sigLowFC
TGME49_306430	-1.36556	10.2168	-3.82654	0.0023802	0.0109835	-1.92174	spindle assembly abnormal protein 6				sigLowFC
TGME49_500039	1.76803	7.73507	3.823	0.00239562	0.0110333	-1.92828	hypothetical protein				sigLowFC
TGME49_225940	1.2647	9.06428	3.82017	0.00240802	0.0110736	-1.93349	sialic acid binding protein SABP1				sigLowFC
TGME49_263230	-1.7256	10.46	-3.82029	0.00240748	0.0110736	-1.93326	apicomplexan amino acid transporter ApiAT7-1				sigLowFC
TGME49_254080	0.721312	9.26618	3.81827	0.00241637	0.0110992	-1.93699	metal cation transporter, ZIP family protein				sigLowFC
TGME49_500072	0.739162	8.65869	3.8176	0.00241934	0.0111065	-1.93823	dynein heavy chain, putative				sigLowFC
[truncated: 5,998 more rows]

## Sheet: 5.2. EES1_vs_Bradyzoite
Gene_ID	logFC	AveExpr	t	P.Value	adj.P.Val	B	Product Description	Gene_name	MarkerStage	label	Category
TGME49_500391	12.1436	9.73585	28.0464	2.26251e-12	5.16951e-10	18.0517	copper amine oxidase, putative	AO2	EES5		sigUp
TGME49_235390	11.7686	10.7869	11.7127	5.88463e-08	7.22878e-07	8.86778	PAN domain-containing protein				sigUp
TGME49_238460	11.6599	5.86717	25.9069	5.81858e-12	8.94831e-10	17.3148	SAG-related sequence SRS22B				sigUp
TGME49_203500	10.9539	10.9397	8.59683	1.69695e-06	1.16286e-05	5.46265	alanine dehydrogenase/pyridine nucleotide transhydrogenase domain-containing protein				sigUp
TGME49_259890	10.8986	9.53003	18.6553	2.81162e-10	1.13639e-08	13.9935	Kazal-type serine protease inhibitor domain-containing protein				sigUp
TGME49_222080	10.8326	5.38228	39.3367	3.95248e-14	6.3216e-11	20.8121	hypothetical protein				sigUp
TGME49_214190	10.8255	9.10672	11.2685	9.05423e-08	1.02704e-06	8.4367	SAG-related sequence SRS46				sigUp
TGME49_277572	10.6189	10.8259	13.183	1.55206e-08	2.47247e-07	10.1878	Toxoplasma gondii family D protein				sigUp
TGME49_251910	10.2736	9.69693	10.9187	1.28418e-07	1.37294e-06	8.0857	hypothetical protein				sigUp
TGME49_257572	10.1524	5.08771	25.663	6.51106e-12	9.20711e-10	17.225	hypothetical protein				sigUp
TGME49_273980	10.1454	8.40286	7.84499	4.38641e-06	2.54928e-05	4.48768	dense granule protein GRA80	GRA80	Merozoite	GRA80	sigUp
TGME49_320770	10.0804	4.30616	16.5755	1.11623e-09	3.28959e-08	12.7192	Toxoplasma gondii family B protein				sigUp
TGME49_207050	10.0722	5.36543	20.3002	1.0426e-10	5.83055e-09	14.8833	hypothetical protein				sigUp
TGME49_209515	9.98428	7.64691	27.6109	2.72629e-12	5.57184e-10	17.9088	hypothetical protein				sigUp
TGME49_209510	9.98158	9.43438	12.3984	3.10724e-08	4.35177e-07	9.50294	hypothetical protein				sigUp
TGME49_235315	9.80262	11.0256	19.3459	1.83602e-10	8.29527e-09	14.3787	PAN domain-containing protein				sigUp
TGME49_313725	9.65505	10.9982	12.7438	2.27864e-08	3.38704e-07	9.80968	RNA binding protein, putative				sigUp
TGME49_275850	9.59654	7.30551	12.1729	3.82014e-08	5.08672e-07	9.29802	dense granule protein GRA12C				sigUp
TGME49_237800	9.47822	7.99386	8.13317	3.02549e-06	1.86401e-05	4.86947	dense granule protein GRA11B	GRA11B	Merozoite	GRA11B	sigUp
TGME49_217710	9.35802	8.07893	15.3514	2.71324e-09	6.53548e-08	11.878	DnaJ domain-containing protein				sigUp
TGME49_251900	9.26994	9.1647	9.17843	8.48206e-07	6.50298e-06	6.17179	hypothetical protein				sigUp
TGME49_238520	9.24057	6.90258	15.9299	1.76938e-09	4.66987e-08	12.2847	SAG-related sequence SRS22G				sigUp
TGME49_295995	9.23947	10.1519	25.7761	6.17955e-12	9.15999e-10	17.2668	hypothetical protein				sigUp
TGME49_238530	9.1595	7.76559	8.09899	3.16022e-06	1.93326e-05	4.82471	SRS domain-containing protein				sigUp
TGME49_268800	9.138	6.14086	24.8869	9.3773e-12	1.19032e-09	16.9307	hypothetical protein				sigUp
TGME49_289240	9.12073	8.77932	7.1972	1.04771e-05	5.3812e-05	3.59094	DnaJ domain-containing protein				sigUp
TGME49_313740	9.02031	8.83616	11.5189	7.08907e-08	8.43621e-07	8.68172	zinc finger (CCCH type) motif-containing protein				sigUp
TGME49_500086	8.99456	7.29219	7.37588	8.19836e-06	4.37181e-05	3.84375	hypothetical protein, conserved				sigUp
TGME49_296640	8.92613	6.04012	13.4925	1.19203e-08	2.01111e-07	10.4465	SAG-related sequence SRS48E				sigUp
TGME49_315240	8.86683	7.51827	14.4854	5.29296e-09	1.07979e-07	11.236	hypothetical protein				sigUp
TGME49_217720	8.81694	7.40094	7.58241	6.20496e-06	3.4507e-05	4.13072	hypothetical protein				sigUp
TGME49_239880	8.76479	8.89823	10.7413	1.53861e-07	1.59588e-06	7.9037	hypothetical protein				sigUp
TGME49_219660	8.73278	6.85438	8.74941	1.40997e-06	9.89085e-06	5.65236	hypothetical protein				sigUp
TGME49_234060	8.72031	8.17203	11.3046	8.73785e-08	9.96813e-07	8.47236	hypothetical protein				sigUp
TGME49_210260	8.63261	10.1691	14.9804	3.59728e-09	8.00804e-08	11.6079	NAD-dependent glycerol-3-phosphate dehydrogenase				sigUp
TGME49_500026	8.62603	5.19747	28.1525	2.16298e-12	5.16951e-10	18.086	Toxoplasma gondii family B protein				sigUp
TGME49_307030	8.5853	10.1763	5.52604	0.000127279	0.000454599	1.01349	Purine nucleoside phosphorylase				sigUp
TGME49_236975	8.54592	11.1907	16.994	8.35317e-10	2.64033e-08	12.9904	Toxoplasma gondii family D protein				sigUp
TGME49_310580	8.50516	7.22112	9.23042	7.98533e-07	6.15802e-06	6.23337	1,3(4)-beta-glucanase				sigUp
TGME49_255480	8.45405	7.4088	7.44617	7.45241e-06	4.02954e-05	3.94204	thioredoxin domain-containing protein				sigUp
TGME49_237080	8.43373	13.666	14.9466	3.69191e-09	8.11938e-08	11.583	hypothetical protein				sigUp
TGME49_207965	8.41836	11.3335	7.31088	8.95942e-06	4.71371e-05	3.75226	FAD-dependent oxidoreductase, putative				sigUp
TGME49_220850	8.39924	3.18838	5.72871	9.21209e-05	0.000344087	1.347	hypothetical protein				sigUp
TGME49_309330	8.39924	7.18066	10.7675	1.49786e-07	1.56931e-06	7.93075	SAG-related sequence SRS55F				sigUp
TGME49_316890	8.38159	8.28033	21.3149	5.86859e-11	3.87861e-09	15.3871	hypothetical oocyst wall protein HOWP1	HOWP1	EES5		sigUp
TGME49_238915	8.37155	9.68959	5.2338	0.000204933	0.000688265	0.522535	hypothetical protein				sigUp
TGME49_204000	8.28046	6.72873	48.4643	3.22027e-15	9.65413e-12	22.167	hypothetical protein				sigUp
TGME49_278240	8.25507	9.18669	7.38449	8.10286e-06	4.33435e-05	3.85582	Zn-finger in Ran binding protein and others domain-containing protein				sigUp
TGME49_214580	8.25238	8.60626	5.4363	0.000147136	0.000516298	0.863987	tetratricopeptide repeat-containing protein				sigUp
TGME49_278245	8.25162	9.30172	7.61514	5.93979e-06	3.32171e-05	4.1757	hypothetical protein				sigUp
TGME49_314440	8.1921	3.75483	5.75153	8.88614e-05	0.000334411	1.38418	hypothetical protein				sigUp
TGME49_237045	8.1919	10.3226	13.8461	8.87427e-09	1.58473e-07	10.7346	hypothetical protein				sigUp
TGME49_212410	8.16467	7.32072	5.54026	0.0001244	0.000445113	1.03708	dense granule protein GRA11A	GRA11A	Merozoite	GRA11A	sigUp
TGME49_242300	8.1614	8.16615	21.4332	5.49751e-11	3.75757e-09	15.4438	dihydrodipicolinate synthase				sigUp
TGME49_285690	8.15102	10.2071	19.7843	1.41115e-10	7.09653e-09	14.6144	notch (dsl) domain-containing protein				sigUp
TGME49_307640	8.14513	9.79625	13.9359	8.24264e-09	1.50494e-07	10.8064	CMGC kinase, CK2 family				sigUp
TGME49_261530	8.14056	9.38251	21.2353	6.13328e-11	3.95735e-09	15.3487	aspartyl protease ASP7				sigUp
TGME49_266650	8.13559	7.01022	11.4109	7.87405e-08	9.17912e-07	8.57663	hypothetical protein				sigUp
TGME49_238500	8.1017	5.91554	12.1452	3.91932e-08	5.19781e-07	9.27255	SAG-related sequence SRS22F				sigUp
TGME49_208850	7.99622	9.54422	6.4815	2.91507e-05	0.000129151	2.53496	SAG-related sequence SRS11				sigUp
TGME49_253150	7.96458	11.097	14.8203	4.07052e-09	8.72706e-08	11.4892	hypothetical protein				sigUp
TGME49_307815	7.90144	3.16652	6.94281	1.49587e-05	7.36153e-05	3.22363	hypothetical protein				sigUp
TGME49_272430	7.88004	8.81975	5.41286	0.000152845	0.000534924	0.824741	perforin-like protein PLP2				sigUp
TGME49_297410	7.8283	11.4901	5.91108	6.92103e-05	0.000270648	1.64215	hypothetical protein				sigUp
TGME49_297920	7.8164	6.45491	6.76967	1.91522e-05	9.06232e-05	2.96861	hypothetical protein				sigUp
TGME49_320290	7.81203	7.73549	18.0775	4.06247e-10	1.46341e-08	13.6574	hypothetical protein				sigUp
TGME49_298820	7.78467	7.63296	6.867	1.66601e-05	8.06482e-05	3.11248	hypothetical protein				sigUp
TGME49_238490	7.77194	5.32718	18.1294	3.92875e-10	1.4281e-08	13.6881	SAG-related sequence SRS22E				sigUp
TGME49_257568	7.76065	4.35138	15.5834	2.28177e-09	5.61455e-08	12.0432	hypothetical protein				sigUp
TGME49_294410	7.75827	9.00639	6.04863	5.59543e-05	0.00022645	1.86166	hypothetical protein				sigUp
TGME49_286020	7.70481	6.78845	6.3991	3.29383e-05	0.000143079	2.40882	hypothetical protein				sigUp
TGME49_207015	7.68431	7.86255	5.25428	0.000198126	0.000668811	0.557333	SRS domain-containing protein				sigUp
TGME49_240370	7.67385	5.38424	16.6784	1.03878e-09	3.08814e-08	12.7866	Toxoplasma gondii family E protein				sigUp
TGME49_297090	7.65176	5.69892	6.66232	2.23677e-05	0.000103217	2.8084	hypothetical protein				sigUp
TGME49_306480	7.63087	6.06695	13.2174	1.50675e-08	2.42934e-07	10.2168	CAM kinase, CDPK family				sigUp
TGME49_500367	7.59946	8.37087	15.3258	2.76604e-09	6.64265e-08	11.8596	hypothetical protein, conserved				sigUp
TGME49_319520	7.55234	6.7034	9.06443	9.69097e-07	7.2587e-06	6.03575	hypothetical protein				sigUp
TGME49_293368	7.52102	6.58421	13.0793	1.69757e-08	2.6307e-07	10.0997	TIP49 C-terminus family protein				sigUp
TGME49_278410	7.50481	5.7413	17.2483	7.02676e-10	2.29359e-08	13.1514	Toxoplasma gondii family A protein				sigUp
TGME49_315350	7.47182	9.20925	23.0684	2.30549e-11	2.24841e-09	16.1863	vacuolar protein sorting-associated protein 46, putative				sigUp
TGME49_500346	7.47078	6.47411	6.38505	3.36344e-05	0.000145707	2.38723	hypothetical protein, conserved				sigUp
TGME49_500439	7.46488	9.75151	4.18362	0.00124889	0.00326279	-1.33118	hypothetical protein, conserved				sigUp
TGME49_277060	7.45245	6.6129	7.55384	6.44674e-06	3.56532e-05	4.09136	hypothetical protein				sigUp
TGME49_278320	7.43807	5.03147	19.7461	1.44359e-10	7.12618e-09	14.5941	Toxoplasma gondii family A protein				sigUp
TGME49_220340	7.41755	5.98695	6.42091	3.18874e-05	0.00013927	2.44231	transporter, putative				sigUp
TGME49_202580	7.41392	9.36013	4.61455	0.000584637	0.00168846	-0.554999	chaperone protein ClpB5, putative				sigUp
TGME49_299020	7.402	8.53253	6.76427	1.93016e-05	9.12262e-05	2.96059	AP2 domain transcription factor AP2III-4				sigUp
TGME49_238980	7.38591	5.47991	23.4801	1.86979e-11	1.93011e-09	16.3619	hypothetical protein				sigUp
TGME49_306680	7.37295	8.06003	5.70306	9.59376e-05	0.00035585	1.30511	hypothetical protein				sigUp
TGME49_217390	7.34662	7.54252	11.8393	5.2177e-08	6.6022e-07	8.98777	hypothetical protein				sigUp
TGME49_285860	7.29344	6.23235	8.30655	2.43054e-06	1.55124e-05	5.09427	SAG-related sequence SRS20C				sigUp
TGME49_274170	7.2899	5.80296	6.66936	2.21399e-05	0.000102284	2.81897	protein kinase (incomplete catalytic triad)				sigUp
TGME49_210740	7.27601	8.23112	7.52372	6.71264e-06	3.68808e-05	4.04974	hypothetical protein				sigUp
TGME49_269120	7.27194	10.1828	8.38815	2.19505e-06	1.43296e-05	5.19882	oxidoreductase, putative				sigUp
TGME49_238470	7.25012	5.60942	8.88429	1.19936e-06	8.65783e-06	5.81787	SAG-related sequence SRS22C				sigUp
TGME49_306510	7.24863	7.02159	6.05509	5.54021e-05	0.000224443	1.8719	zinc finger (CCCH type) motif-containing protein				sigUp
TGME49_277770	7.22795	8.23986	4.65533	0.000544774	0.00159289	-0.482581	zinc finger (CCCH type) motif-containing protein				sigUp
TGME49_276980	7.22461	6.1582	6.39022	3.33767e-05	0.000144747	2.39517	hypothetical protein				sigUp
TGME49_208020	7.16494	7.05614	5.08908	0.000260597	0.000846465	0.275122	AP2 domain transcription factor AP2Ib-1				sigUp
TGME49_212420	7.12765	6.11513	5.11826	0.000248213	0.000812176	0.325238	hypothetical protein				sigUp
TGME49_219780	7.11395	1.96118	3.50741	0.00427755	0.00937964	-2.57851	hypothetical protein				sigUp
TGME49_254760	7.11395	9.88301	19.9931	1.24735e-10	6.4773e-09	14.7243	hypothetical protein				sigUp
TGME49_321490	7.11395	6.00319	16.4408	1.22708e-09	3.49216e-08	12.6302	SAG-related sequence SRS12A				sigUp
TGME49_320240	7.09656	6.14362	6.89032	1.61158e-05	7.84405e-05	3.14676	SAG-related sequence SRS15B				sigUp
TGME49_306870	7.07055	3.29836	22.8203	2.62027e-11	2.34435e-09	16.0784	hypothetical protein				sigUp
TGME49_278330	7.04835	4.04371	27.8995	2.40869e-12	5.35064e-10	18.0038	Toxoplasma gondii family A protein				sigUp
TGME49_500260	7.02623	9.24	7.25931	9.61661e-06	5.0133e-05	3.67929	hypothetical protein, conserved				sigUp
TGME49_278430	7.0212	4.96423	8.85305	1.24496e-06	8.90512e-06	5.77972	Toxoplasma gondii family A protein				sigUp
TGME49_217370	6.99226	4.29367	12.9376	1.92071e-08	2.90908e-07	9.97817	hypothetical protein				sigUp
TGME49_254960	6.94984	7.22846	9.23526	7.9407e-07	6.12952e-06	6.23909	hypothetical protein				sigUp
TGME49_278360	6.94935	6.1156	13.2626	1.44946e-08	2.36961e-07	10.2549	Toxoplasma gondii family A protein				sigUp
TGME49_204010	6.91448	8.80854	5.91376	6.89221e-05	0.000269785	1.64646	hypothetical protein				sigUp
TGME49_278340	6.89148	8.44904	6.57903	2.52564e-05	0.000114434	2.68301	Toxoplasma gondii family A protein				sigUp
TGME49_312690	6.88469	7.34127	8.40965	2.13714e-06	1.40433e-05	5.22624	hypothetical protein				sigUp
TGME49_236120	6.87731	9.11778	7.28593	9.2712e-06	4.85539e-05	3.717	hypothetical protein				sigUp
TGME49_315380	6.85753	5.04301	9.01139	1.03153e-06	7.63103e-06	5.97197	SAG-related sequence SRS53B				sigUp
TGME49_320730	6.85726	7.94459	20.6247	8.65017e-11	5.08643e-09	15.0479	homoserine O-acetyltransferase, putative				sigUp
TGME49_277020	6.85726	2.6515	5.23346	0.000205048	0.000688265	0.521958	hypothetical protein				sigUp
TGME49_222188	6.85284	7.95864	5.77348	8.5839e-05	0.000324718	1.41989	microneme protein MIC21L1				sigUp
TGME49_216790	6.82875	10.2125	3.89111	0.00211619	0.00510812	-1.86759	ATP-binding cassette sub-family E member 1, putative				sigUp
TGME49_315370	6.8243	5.04124	12.6958	2.37781e-08	3.50837e-07	9.76762	SAG-related sequence SRS53A				sigUp
TGME49_300990	6.80647	8.61954	12.2573	3.5346e-08	4.80718e-07	9.37515	Toxoplasma gondii family C protein				sigUp
TGME49_219090	6.80525	3.12846	5.09065	0.000259915	0.000844936	0.27782	hypothetical protein				sigUp
TGME49_243180	6.80035	5.27502	11.0373	1.13949e-07	1.23812e-06	8.20589	Toxoplasma gondii family A protein				sigUp
TGME49_207250	6.77853	9.27271	16.5556	1.13188e-09	3.31561e-08	12.7061	electron-transfer-flavoprotein, alpha polypeptide				sigUp
TGME49_220730	6.77853	2.69344	5.36057	0.000166433	0.000574577	0.736945	hypothetical protein				sigUp
TGME49_231880	6.77736	5.77213	8.8834	1.20064e-06	8.65783e-06	5.81679	hypothetical protein				sigUp
TGME49_500401	6.76115	8.26748	18.3733	3.36024e-10	1.28573e-08	13.8311	PAN domain-containing protein				sigUp
TGME49_277950	6.74756	9.38816	5.55668	0.000121163	0.00043548	1.06427	lipase				sigUp
TGME49_218215	6.74547	9.78803	7.23021	1.001e-05	5.17455e-05	3.63796	hypothetical protein				sigUp
TGME49_200480	6.73868	4.88986	11.7412	5.72651e-08	7.05984e-07	8.89496	Toxoplasma gondii family B protein				sigUp
TGME49_235200	6.73575	10.1238	13.4086	1.27973e-08	2.11883e-07	10.377	PAN domain-containing protein				sigUp
TGME49_275380	6.72576	6.71552	6.34698	3.5601e-05	0.000153395	2.32855	SAG-related sequence SRS47D				sigUp
TGME49_219348	6.72355	4.98719	7.3971	7.9652e-06	4.27215e-05	3.87348	SAG-related sequence SRS55M				sigUp
TGME49_225370	6.69525	5.70797	18.3547	3.40044e-10	1.28878e-08	13.8202	hypothetical protein				sigUp
TGME49_233370	6.68271	8.56443	9.51357	5.77471e-07	4.72192e-06	6.5637	hypothetical protein				sigUp
TGME49_283840	6.66639	5.04021	23.6847	1.68712e-11	1.82323e-09	16.4476	GATA zinc finger domain-containing protein				sigUp
TGME49_224080	6.66301	8.73772	8.84485	1.25722e-06	8.9768e-06	5.76969	Kazal-type serine protease inhibitor domain-containing protein				sigUp
TGME49_207005	6.64926	8.4849	29.5837	1.19726e-12	3.98845e-10	18.5297	SAG-related sequence SRS48Q				sigUp
TGME49_282230	6.64799	11.7991	12.1866	3.77219e-08	5.0361e-07	9.31056	sulfate adenylyltransferase/adenylylsulfate kinase				sigUp
TGME49_500061	6.62096	10.6113	15.1316	3.20419e-09	7.49236e-08	11.7189	PAN domain-containing protein				sigUp
TGME49_220080	6.6113	6.53093	4.83368	0.00040105	0.00122272	-0.168182	Toxoplasma gondii family C protein				sigUp
TGME49_200320	6.56317	10.7089	15.1367	3.19192e-09	7.48556e-08	11.7226	hypoxanthine-xanthine-guanine phosphoribosyl transferase HXGPRT				sigUp
TGME49_240340	6.51311	6.33421	7.36024	8.37498e-06	4.44424e-05	3.82178	Toxoplasma gondii family E protein				sigUp
TGME49_248620	6.51273	2.39577	3.65318	0.00326951	0.00745759	-2.3078	hypothetical protein				sigUp
TGME49_266700	6.50992	9.48726	13.9552	8.11308e-09	1.4915e-07	10.8219	hypothetical protein				sigUp
TGME49_282200	6.50805	6.82981	5.81657	8.02184e-05	0.000306355	1.48979	chaperone protein ClpB4, putative				sigUp
TGME49_233360	6.44641	9.76505	5.19881	0.000217132	0.000723202	0.462981	hypothetical protein				sigUp
TGME49_281350	6.44637	6.5341	11.3186	8.61824e-08	9.9023e-07	8.48617	hypothetical protein				sigUp
TGME49_500035	6.44634	7.84358	11.7873	5.4812e-08	6.8704e-07	8.93864	hypothetical protein, conserved				sigUp
TGME49_258520	6.4196	8.70766	6.73664	2.00857e-05	9.45292e-05	2.91948	WD domain, G-beta repeat-containing protein				sigUp
TGME49_243120	6.41514	4.32713	10.6547	1.68208e-07	1.71577e-06	7.81383	Toxoplasma gondii family A protein				sigUp
TGME49_233610	6.3788	5.38614	6.17892	4.58593e-05	0.000190513	2.06709	hypothetical protein				sigUp
TGME49_219840	6.3768	2.17039	6.50769	2.8046e-05	0.000125298	2.57485	hypothetical protein				sigUp
TGME49_273120	6.37243	6.40362	5.4457	0.000144911	0.00051021	0.879694	SAG-related sequence SRS30C				sigUp
TGME49_272280	6.35632	8.63223	7.14045	1.13353e-05	5.77748e-05	3.50975	protein phosphatase PPM5A				sigUp
TGME49_278180	6.34072	10.2831	14.4591	5.40483e-09	1.09424e-07	11.2158	hypothetical protein				sigUp
TGME49_298090	6.34072	3.63401	6.17487	4.61422e-05	0.000191588	2.06074	Toxoplasma gondii family B protein				sigUp
TGME49_228160	6.32985	5.78453	8.1714	2.88207e-06	1.79361e-05	4.91934	acid phosphatase				sigUp
TGME49_207010	6.32204	8.54097	25.128	8.36278e-12	1.13351e-09	17.0236	SAG-related sequence SRS48K				sigUp
TGME49_500119	6.23114	5.05921	5.76077	8.75755e-05	0.000330505	1.39922	CRAL/TRIO domain-containing protein, putative				sigUp
TGME49_216200	6.22673	2.17781	6.136	4.89532e-05	0.000201897	1.99968	hypothetical protein				sigUp
TGME49_287990	6.22673	3.19044	5.00526	0.000299911	0.000955534	0.130549	hypothetical protein				sigUp
TGME49_316670	6.22532	11.3455	7.6397	5.74874e-06	3.23296e-05	4.20935	Toxoplasma gondii family D protein				sigUp
TGME49_235010	6.22493	6.84858	4.63058	0.000568622	0.00164935	-0.52652	hypothetical protein				sigUp
TGME49_320250	6.2195	5.07859	6.71697	2.06646e-05	9.68101e-05	2.89016	SAG-related sequence SRS15A				sigUp
TGME49_232040	6.20113	6.20737	4.44584	0.000784802	0.00218907	-0.856588	cell division control protein CDC50.2				sigUp
TGME49_205050	6.18716	8.67554	5.92022	6.82341e-05	0.000267878	1.65682	hypothetical protein				sigUp
TGME49_217860	6.17387	7.81774	7.62316	5.87667e-06	3.29563e-05	4.18669	hypothetical protein				sigUp
TGME49_270680	6.17375	4.91755	5.23611	0.000204151	0.000686254	0.526474	hypothetical protein				sigUp
TGME49_243150	6.14342	5.99992	8.28751	2.48927e-06	1.58219e-05	5.06976	Toxoplasma gondii family A protein				sigUp
TGME49_235950	6.12453	8.56373	5.39377	0.000157665	0.00054867	0.792736	subtilisin SUB8				sigUp
TGME49_301690	6.12168	6.018	4.18963	0.00123556	0.00323352	-1.32024	hypothetical protein				sigUp
TGME49_309352	6.11856	6.98382	11.3189	8.61559e-08	9.9023e-07	8.48648	SAG-related sequence SRS55N				sigUp
TGME49_223830	6.11748	10.6625	4.18958	0.00123567	0.00323352	-1.32032	fasciclin domain-containing protein				sigUp
TGME49_222420	6.10306	7.6816	5.86642	7.41991e-05	0.000286791	1.5703	hypothetical protein				sigUp
TGME49_216785	6.09389	7.65021	5.66449	0.000101995	0.000376571	1.24194	hypothetical protein				sigUp
TGME49_201180	6.08563	10.4493	13.062	1.72325e-08	2.65527e-07	10.0849	megakaryocyte stimulating factor MSF				sigUp
TGME49_313520	6.07519	5.76043	5.74872	8.92554e-05	0.000335325	1.37961	hypothetical protein				sigUp
TGME49_276190	6.06441	8.42567	4.43672	0.000797473	0.00222054	-0.872977	hypothetical protein				sigUp
TGME49_295430	6.05003	6.81303	5.99787	6.05031e-05	0.000242164	1.78096	hypothetical protein				sigUp
TGME49_500343	5.9974	5.88542	9.4237	6.39514e-07	5.11419e-06	6.45977	thrombospondin type 1 domain-containing protein				sigUp
TGME49_202572	5.97646	8.5329	3.82643	0.00238067	0.00565473	-1.98698	ribophorin i protein				sigUp
TGME49_319630	5.97126	7.99689	20.5046	9.2661e-11	5.36964e-09	14.9874	hypothetical protein				sigUp
TGME49_310275	5.96754	7.43746	16.2555	1.39953e-09	3.84607e-08	12.5064	hypothetical protein				sigUp
TGME49_311485	5.95464	3.84165	9.99753	3.37574e-07	3.03324e-06	7.10928	hypothetical protein				sigUp
TGME49_271892	5.9356	7.64243	5.78811	8.3886e-05	0.000318083	1.44365	hypothetical protein				sigUp
TGME49_291830	5.92704	11.6711	11.1044	1.06543e-07	1.17359e-06	8.2734	hypothetical protein, conserved				sigUp
TGME49_229300	5.91943	2.28607	7.309	8.98243e-06	4.71961e-05	3.74962	hypothetical protein				sigUp
TGME49_215410	5.91943	6.60033	20.8979	7.40827e-11	4.66488e-09	15.1839	DPCD family protein				sigUp
TGME49_306230	5.8944	8.53397	4.267	0.00107644	0.00287677	-1.17956	hypothetical protein				sigUp
TGME49_307480	5.89134	4.72104	4.07644	0.00151351	0.00383387	-1.52696	Toxoplasma gondii family B protein				sigUp
TGME49_277860	5.89134	7.6217	5.44427	0.000145248	0.000510571	0.877301	hypothetical protein				sigUp
TGME49_221455	5.86965	2.1927	6.0819	5.31712e-05	0.000216282	1.91434	hypothetical protein				sigUp
TGME49_268270	5.86965	5.97944	18.0305	4.18807e-10	1.48521e-08	13.6294	hypothetical protein				sigUp
TGME49_270850	5.86287	7.40687	4.99699	0.000304112	0.000966223	0.116242	glycosyl hydrolases family 17 protein				sigUp
TGME49_219828	5.85435	10.4987	3.21727	0.00732906	0.0150091	-3.11753	HMG (high mobility group) box domain-containing protein				sigUp
TGME49_309010	5.85039	8.17179	4.0325	0.00163819	0.00409244	-1.60751	elongation factor P, putative				sigUp
TGME49_315260	5.84252	9.58747	5.47365	0.0001385	0.0004903	0.926351	alanine dehydrogenase				sigUp
TGME49_249190	5.82331	6.74046	4.15416	0.00131648	0.0034104	-1.38491	AP2 domain transcription factor AP2XII-6				sigUp
TGME49_266335	5.8181	4.45456	4.13788	0.00135543	0.00349207	-1.41462	Toxoplasma gondii family A protein				sigUp
TGME49_500094	5.8181	6.18022	13.4467	1.23909e-08	2.07735e-07	10.4086	transmembrane protein, putative				sigUp
TGME49_313775	5.8181	3.76488	4.54397	0.000660988	0.00187914	-0.680791	hypothetical protein				sigUp
TGME49_243940	5.80579	9.91922	13.1288	1.62634e-08	2.55016e-07	10.1418	dense granule protein GRA81	GRA81	Merozoite	GRA81	sigUp
TGME49_217875	5.79415	5.68671	9.88653	3.81105e-07	3.38257e-06	6.98621	hypothetical protein				sigUp
TGME49_217410	5.78918	6.28131	4.02896	0.00164866	0.00411369	-1.61399	hypothetical protein				sigUp
TGME49_318300	5.7888	6.45016	3.93281	0.00196185	0.00479196	-1.79073	hypothetical protein				sigUp
TGME49_246200	5.78545	8.06026	3.9591	0.00187057	0.00459286	-1.74235	zinc finger (CCCH type) motif-containing protein				sigUp
TGME49_265175	5.76969	3.64522	3.04207	0.0101586	0.0199506	-3.44173	hypothetical protein				sigUp
TGME49_278370	5.76969	5.52318	9.04527	9.91174e-07	7.38028e-06	6.01274	Toxoplasma gondii family A protein				sigUp
TGME49_232170	5.76966	10.4991	6.16168	4.70759e-05	0.000194757	2.04006	hypothetical protein				sigUp
TGME49_223030	5.76463	5.16377	13.2017	1.5272e-08	2.45241e-07	10.2036	tetratricopeptide repeat-containing protein				sigUp
TGME49_286230	5.74783	7.23514	4.23122	0.00114719	0.00303176	-1.24454	hypothetical protein				sigUp
TGME49_237810	5.74776	8.15289	5.58006	0.000116705	0.000421732	1.10294	hypothetical protein				sigUp
TGME49_280810	5.74677	7.0315	3.9149	0.00202666	0.00492919	-1.82373	hypothetical protein				sigUp
TGME49_500052	5.73806	5.88006	5.57778	0.000117132	0.000423082	1.09918	hypothetical protein, conserved				sigUp
TGME49_500353	5.73298	4.26837	5.39334	0.000157776	0.000548819	0.792008	SAG-related sequence				sigUp
TGME49_234590	5.70911	2.52962	8.35392	2.29071e-06	1.47882e-05	5.15506	hypothetical protein				sigUp
TGME49_243140	5.70911	4.03472	9.53741	5.62116e-07	4.61524e-06	6.59114	Toxoplasma gondii family A protein				sigUp
TGME49_248970	5.70911	6.62149	16.4094	1.25461e-09	3.54058e-08	12.6093	leucine rich repeat-containing protein				sigUp
TGME49_252860	5.70911	3.04671	22.5913	2.95245e-11	2.53879e-09	15.9772	hypothetical protein				sigUp
TGME49_218610	5.70859	6.87879	3.05339	0.00994642	0.0195722	-3.42083	ATPase (DUF699) protein				sigUp
TGME49_236020	5.69719	7.12804	7.7557	4.93097e-06	2.81865e-05	4.36728	BT1 family protein				sigUp
TGME49_281640	5.69563	6.75185	4.28118	0.00104965	0.00281209	-1.15384	hypothetical protein				sigUp
TGME49_236290	5.69449	5.93491	4.94804	0.000330281	0.00103619	0.0313495	hypothetical protein				sigUp
TGME49_500295	5.68142	4.35474	5.60946	0.000111344	0.000406026	1.15146	Toxoplasma gondii family B protein				sigUp
TGME49_258120	5.67989	6.83617	5.81497	8.04207e-05	0.000306834	1.48719	Pex2 / Pex12 amino terminal region protein				sigUp
TGME49_243160	5.65136	5.12711	14.7633	4.25524e-09	9.00242e-08	11.4464	Toxoplasma gondii family A protein				sigUp
TGME49_278380	5.63788	5.36822	7.4991	6.93864e-06	3.79142e-05	4.01563	Toxoplasma gondii family A protein				sigUp
TGME49_209790	5.6224	7.23961	3.73154	0.00283157	0.00658449	-2.16253	radical SAM domain-containing protein				sigUp
TGME49_243110	5.61353	3.58508	6.01117	5.92749e-05	0.000237724	1.80214	hypothetical protein				sigUp
TGME49_278390	5.60004	5.76075	3.86899	0.00220303	0.00529536	-1.90838	Toxoplasma gondii family A protein				sigUp
TGME49_228240	5.59795	9.37383	5.2159	0.00021108	0.00070596	0.492097	hypothetical protein				sigUp
TGME49_241165	5.59121	7.81479	15.956	1.73615e-09	4.59735e-08	12.3027	hypothetical protein				sigUp
TGME49_266785	5.59121	10.0106	10.0795	3.08863e-07	2.83906e-06	7.1994	zinc finger (CCCH type) motif-containing protein				sigUp
TGME49_291920	5.59121	2.584	4.52052	0.0006886	0.00194643	-0.722712	hypothetical protein				sigUp
TGME49_214160	5.56252	3.49625	4.78656	0.000434674	0.00131025	-0.250874	hypothetical protein				sigUp
TGME49_294980	5.55778	5.66056	3.57646	0.0037656	0.00844506	-2.45023	hypothetical protein				sigUp
TGME49_286150	5.5496	8.99202	7.42324	7.68751e-06	4.14266e-05	3.91004	PAN/Apple domain-containing protein				sigUp
TGME49_271300	5.53063	8.01858	3.24233	0.00699502	0.0144322	-3.07103	DNA-directed RNA polymerase II RPB7				sigUp
TGME49_253500	5.52844	6.12807	13.9259	8.31049e-09	1.51043e-07	10.7985	intraflagellar transport 57-like protein				sigUp
TGME49_312850	5.52844	1.91283	5.72033	9.3351e-05	0.000348031	1.33332	hypothetical protein				sigUp
TGME49_272285	5.52844	4.89248	23.8634	1.54335e-11	1.73833e-09	16.5216	tetratricopeptide repeat-containing protein				sigUp
TGME49_240350	5.52509	5.98202	5.06669	0.000270536	0.000874839	0.236604	Toxoplasma gondii family E protein				sigUp
TGME49_217400	5.52438	7.85262	4.82635	0.000406098	0.0012367	-0.181032	hypothetical protein				sigUp
TGME49_238480	5.51141	5.51897	6.87044	1.65787e-05	8.03027e-05	3.11753	SAG-related sequence SRS22D				sigUp
TGME49_500111	5.51141	2.91501	8.02239	3.48596e-06	2.10394e-05	4.72391	Toxoplasma gondii family B protein				sigUp
TGME49_206650	5.47124	6.01524	4.35719	0.000917424	0.00250483	-1.01628	zinc finger, c2h2 type domain-containing protein				sigUp
TGME49_273340	5.46281	3.31805	13.677	1.02106e-08	1.76358e-07	10.5978	hypothetical protein				sigUp
TGME49_500318	5.46281	7.06213	14.5287	5.11483e-09	1.05153e-07	11.269	zinc finger (CCCH type) motif-containing protein				sigUp
TGME49_500319	5.46281	1.76916	8.85403	1.2435e-06	8.90269e-06	5.78091	hypothetical protein, conserved				sigUp
TGME49_211330	5.45488	6.96423	3.58609	0.00369931	0.00831227	-2.43234	methionine aminopeptidase 1c				sigUp
TGME49_202400	5.44793	10.3353	3.5447	0.00399282	0.00885977	-2.50922	calcium binding egf domain-containing protein				sigUp
TGME49_240325	5.43294	4.81144	5.36326	0.000165703	0.000572408	0.74148	Toxoplasma gondii family E protein				sigUp
TGME49_281675	5.41348	9.80804	9.15365	8.73031e-07	6.65551e-06	6.14234	rhoptry kinase family protein ROP35				sigUp
TGME49_234390	5.4131	9.29793	3.00062	0.0109748	0.0213593	-3.51813	hypothetical protein				sigUp
TGME49_500278	5.40703	6.10032	8.83614	1.27041e-06	9.05477e-06	5.75902	hypothetical protein, conserved				sigUp
TGME49_314670	5.40703	7.65835	8.60821	1.67353e-06	1.15075e-05	5.47689	hypothetical protein				sigUp
TGME49_253550	5.40453	7.00527	5.81385	8.05619e-05	0.000307226	1.48538	WD repeat-containing protein 92, putative				sigUp
TGME49_218900	5.39406	5.67586	15.7952	1.95204e-09	5.03564e-08	12.1915	hypothetical protein				sigUp
TGME49_280605	5.39406	7.24536	17.2731	6.9102e-10	2.27411e-08	13.167	hypothetical protein				sigUp
TGME49_219530	5.38922	5.77665	3.86833	0.00220569	0.00529888	-1.9096	hypothetical protein				sigUp
TGME49_277230	5.34554	8.94872	15.4692	2.48422e-09	6.0384e-08	11.9622	dense granule protein GRA82	GRA82	Merozoite	GRA82	sigUp
TGME49_294820	5.3419	10.2373	11.6525	6.23317e-08	7.62181e-07	8.81033	type I fatty acid synthase, putative				sigUp
TGME49_299130	5.33677	6.85928	3.38283	0.00538763	0.0114924	-2.81007	hypothetical protein				sigUp
TGME49_213300	5.33595	6.80271	3.45365	0.00472486	0.0102453	-2.67843	hypothetical protein				sigUp
TGME49_247652	5.33189	8.6244	3.28418	0.0064711	0.0135012	-2.99335	peroxisome assembly protein PEX12, putative				sigUp
TGME49_500223	5.32268	8.99676	3.45603	0.00470408	0.0102113	-2.67401	oocyst wall protein				sigUp
TGME49_271410	5.32186	1.72569	5.95162	6.49882e-05	0.000256901	1.70713	hypothetical protein				sigUp
TGME49_210975	5.32186	1.97079	6.12689	4.96375e-05	0.000204193	1.98535	hypothetical protein				sigUp
TGME49_270340	5.29248	9.31559	4.21397	0.00118302	0.00311102	-1.27591	BTB/POZ domain-containing protein				sigUp
TGME49_319740	5.28869	5.45551	3.57161	0.00379941	0.00850611	-2.45923	transporter, major facilitator family protein				sigUp
TGME49_313120	5.2611	5.64915	4.05341	0.00157757	0.00396605	-1.56915	DNA-directed RNA polymerase, alpha subunit				sigUp
TGME49_257770	5.25898	7.61871	3.11499	0.00886749	0.0177328	-3.30701	histone lysine methyltransferase SET2				sigUp
TGME49_244440	5.25589	9.99576	6.65755	2.25232e-05	0.000103755	2.80125	adenosine transporter AT1				sigUp
TGME49_256220	5.24586	3.05162	5.39709	0.000156815	0.000546428	0.798303	hypothetical protein				sigUp
TGME49_267000	5.24586	1.7748	4.06163	0.00155442	0.00392135	-1.55411	hypothetical protein				sigUp
TGME49_280430	5.24586	9.30784	12.4596	2.93962e-08	4.16811e-07	9.55787	ML domain-containing protein				sigUp
TGME49_283470	5.24586	6.29644	22.3443	3.3623e-11	2.74612e-09	15.8666	Kazal-type serine protease inhibitor domain-containing protein				sigUp
TGME49_207730	5.24586	9.65793	10.5091	1.95673e-07	1.94869e-06	7.6612	hypothetical protein				sigUp
TGME49_240330	5.24586	4.77898	15.1381	3.1885e-09	7.48556e-08	11.7236	Toxoplasma gondii family E protein				sigUp
TGME49_228175	5.23903	8.84623	8.20157	2.77402e-06	1.73582e-05	4.95858	hypothetical protein				sigUp
TGME49_275798	5.23903	5.30308	7.41648	7.75831e-06	4.17799e-05	3.9006	microneme protein, putative				sigUp
TGME49_289490	5.23076	9.2716	3.62692	0.00343131	0.00778223	-2.35653	protein phosphatase PPM11A, putative				sigUp
TGME49_281360	5.22793	7.78147	4.99077	0.000307311	0.000974451	0.105479	hypothetical protein				sigUp
TGME49_201710	5.22243	8.45992	3.3968	0.00524982	0.0112524	-2.78411	WD domain, G-beta repeat-containing protein				sigUp
TGME49_204870	5.22237	7.98256	4.38569	0.00087242	0.00239751	-0.964853	thrombospondin type 1 domain-containing protein				sigUp
TGME49_311380	5.22105	9.8839	9.83958	4.01293e-07	3.52653e-06	6.9338	hypothetical protein				sigUp
TGME49_207610	5.21939	6.04625	7.03846	1.30714e-05	6.52511e-05	3.36277	rhoptry kinase family protein ROP36 (incomplete catalytic triad)				sigUp
TGME49_240243	5.19134	6.89232	3.72053	0.0028893	0.00670119	-2.18294	hypothetical protein				sigUp
TGME49_259920	5.18838	7.41058	3.26312	0.00672965	0.0139458	-3.03245	GTP-binding protein, putative				sigUp
TGME49_209470	5.17688	11.5486	3.89789	0.00209027	0.00505928	-1.85509	hypothetical protein				sigUp
TGME49_215900	5.16564	4.28752	9.00309	1.04169e-06	7.67961e-06	5.96195	hypothetical protein				sigUp
TGME49_229240	5.16564	4.70965	13.6862	1.01324e-08	1.75576e-07	10.6053	hypothetical protein				sigUp
TGME49_254830	5.13944	6.32104	4.19614	0.00122128	0.00320005	-1.30837	hypothetical protein				sigUp
TGME49_252870	5.13683	5.88064	3.71499	0.00291881	0.00675396	-2.19321	hypothetical protein				sigUp
TGME49_259130	5.13598	6.53043	4.01974	0.00167633	0.00416841	-1.63092	4-hydroxybenzoate polyprenyl transferase				sigUp
TGME49_266610	5.10991	10.2386	6.70885	2.09086e-05	9.7724e-05	2.87804	Kazal-type serine protease inhibitor domain-containing protein				sigUp
TGME49_278350	5.10795	5.41735	4.23229	0.00114502	0.00302802	-1.24261	Toxoplasma gondii family A protein				sigUp
TGME49_247660	5.10725	7.06081	7.03939	1.30545e-05	6.52071e-05	3.36411	thioredoxin domain-containing protein				sigUp
TGME49_259160	5.09263	7.71232	3.49996	0.0043369	0.00949273	-2.59236	hypothetical protein				sigUp
TGME49_218350	5.08068	2.1974	5.04493	0.000280583	0.000902582	0.199084	hypothetical protein				sigUp
TGME49_285350	5.08068	5.86439	18.4093	3.28416e-10	1.26266e-08	13.852	dynein light chain, putative				sigUp
TGME49_301260	5.08068	1.80076	4.48476	0.000733029	0.00205974	-0.786736	hypothetical protein				sigUp
TGME49_500211	5.08068	6.04025	12.4382	2.99714e-08	4.23465e-07	9.53868	coiled-coil domain-containing protein 103, putative				sigUp
TGME49_500230	5.08068	5.27441	11.8418	5.20557e-08	6.59729e-07	8.99009	hypothetical protein, conserved				sigUp
TGME49_286060	5.08068	7.29708	14.7957	4.1491e-09	8.84808e-08	11.4708	tricarboxylate carrier protein				sigUp
TGME49_295390	5.07605	7.44543	5.60103	0.000112853	0.000410525	1.13757	hypothetical protein				sigUp
TGME49_206290	5.06837	5.05692	5.08851	0.000260843	0.000846919	0.274152	hypothetical protein				sigUp
TGME49_220212	5.05496	5.88586	3.21168	0.00740573	0.0151428	-3.1279	pseudouridine synthase				sigUp
TGME49_305110	5.04773	4.33171	5.38446	0.000160072	0.000555183	0.777114	hypothetical protein				sigUp
TGME49_285480	5.01777	6.02606	3.54811	0.00396778	0.00881489	-2.50289	hypothetical protein				sigUp
TGME49_224750	5.01324	7.38206	4.32914	0.000964079	0.00261954	-1.06697	SAG-related sequence SRS40F				sigUp
TGME49_247340	5.00763	5.60212	7.56236	6.37357e-06	3.52974e-05	4.10312	PIH1 domain-containing protein				sigUp
TGME49_267610	5.00763	2.68079	4.18662	0.00124222	0.00324853	-1.32571	hypothetical protein				sigUp
TGME49_311700	5.00576	7.79948	10.3375	2.34377e-07	2.24468e-06	7.47881	hypothetical protein				sigUp
TGME49_286200	5.00261	6.52215	4.86899	0.00037765	0.00116156	-0.106413	hypothetical protein				sigUp
TGME49_230910	4.99897	6.21382	3.83861	0.00232839	0.00555162	-1.96448	hypothetical protein				sigUp
TGME49_304690	4.99041	2.76084	5.85519	7.55117e-05	0.00029088	1.5522	hypothetical protein				sigUp
TGME49_223520	4.99041	6.04564	9.81838	4.10786e-07	3.59415e-06	6.91005	EF hand domain-containing protein				sigUp
TGME49_500138	4.99041	5.56392	11.1294	1.03926e-07	1.14634e-06	8.29838	hypothetical protein				sigUp
TGME49_251650	4.99041	1.86292	5.98665	6.15599e-05	0.000245901	1.76309	hypothetical protein				sigUp
TGME49_500018	4.97784	8.22846	4.58353	0.000617001	0.00177042	-0.610228	hypothetical protein, conserved				sigUp
TGME49_205420	4.97285	7.96075	3.70358	0.00298048	0.00688075	-2.21434	aspartate-semialdehyde dehydrogenase				sigUp
TGME49_262030	4.9727	6.71557	3.14691	0.00835534	0.0168646	-3.24793	ALG6, ALG8 glycosyltransferase family protein				sigUp
TGME49_244240	4.96755	5.95042	3.74314	0.00277208	0.00645743	-2.14106	methyltransferase, putative				sigUp
TGME49_266065	4.96089	9.36718	3.56947	0.00381443	0.00853258	-2.46321	hypothetical protein				sigUp
TGME49_203730	4.95621	6.86285	2.64814	0.0211406	0.0372957	-4.16027	hypothetical protein				sigUp
TGME49_209770	4.95526	6.86597	3.55551	0.00391392	0.00871855	-2.48913	helicase, putative				sigUp
TGME49_285540	4.95244	7.72075	3.02023	0.0105807	0.0206627	-3.48199	DNA-directed DNA polymerase				sigUp
TGME49_211470	4.94607	6.85526	3.55534	0.00391513	0.00871883	-2.48944	Fcf2 pre-rRNA processing protein				sigUp
TGME49_278290	4.9396	5.61922	5.65892	0.000102902	0.000379394	1.2328	Toxoplasma gondii family A protein				sigUp
TGME49_304640	4.9347	5.70649	3.39446	0.00527264	0.0112892	-2.78845	hypothetical protein				sigUp
TGME49_257610	4.92078	5.50452	6.26768	4.00998e-05	0.000169581	2.20568	hypothetical protein				sigUp
TGME49_295410	4.92041	7.49434	3.30299	0.00624873	0.0131025	-2.95842	transcription initiation factor TFIID complex subunit TAF6				sigUp
TGME49_209240	4.91973	6.62084	2.58603	0.0237141	0.0412893	-4.27151	RNA methyltransferase				sigUp
TGME49_297780	4.91243	8.0112	2.93329	0.0124423	0.023736	-3.64193	DNA gyrase subunit B				sigUp
TGME49_268260	4.91192	7.52237	3.58726	0.00369131	0.00829896	-2.43016	hypothetical protein				sigUp
TGME49_270760	4.90042	7.29932	3.90663	0.00205732	0.00499314	-1.83897	asparagine synthase				sigUp
TGME49_267650	4.89697	8.04705	2.95045	0.0120506	0.0230989	-3.61041	hypothetical protein				sigUp
TGME49_246000	4.89543	7.62541	3.10892	0.00896823	0.017885	-3.31822	large subunit ribosomal protein IMG2				sigUp
TGME49_214860	4.89412	1.58512	5.64831	0.000104654	0.000384967	1.21538	hypothetical protein				sigUp
TGME49_229230	4.89412	4.59988	11.8703	5.06699e-08	6.45626e-07	9.01698	hypothetical protein				sigUp
TGME49_252370	4.89412	5.60929	8.89515	1.18394e-06	8.5683e-06	5.83111	AP2 domain transcription factor AP2III-1				sigUp
TGME49_289930	4.88722	8.12398	6.92915	1.52511e-05	7.487e-05	3.20366	phosphoenolpyruvate carboxykinase, putative				sigUp
TGME49_306890	4.86548	8.98755	9.44765	6.22312e-07	5.00163e-06	6.48755	hypothetical protein				sigUp
TGME49_260310	4.85852	10.0361	13.763	9.50581e-09	1.66706e-07	10.6675	ATP-binding cassette transporter ABC.B1				sigUp
TGME49_258826	4.85771	7.32957	3.23732	0.00706056	0.0145411	-3.08033	hypothetical protein				sigUp
TGME49_252300	4.8553	8.74549	5.44167	0.00014586	0.000512497	0.872964	hypothetical protein				sigUp
TGME49_288250	4.84432	6.74405	3.69243	0.0030421	0.00699875	-2.23501	WD repeat-containing protein				sigUp
TGME49_226755	4.83589	7.81998	6.02263	5.82372e-05	0.000234149	1.82037	3'5'-cyclic nucleotide phosphodiesterase PDE18				sigUp
TGME49_283830	4.83543	5.61647	3.79265	0.00253207	0.00597269	-2.04943	type I inorganic pyrophosphatase PPase				sigUp
TGME49_254430	4.83111	11.9361	13.0799	1.69671e-08	2.6307e-07	10.1002	microneme protein, putative				sigUp
TGME49_216150	4.8295	9.5372	3.78663	0.00256007	0.00603208	-2.06056	peptidase family M3 protein				sigUp
TGME49_265430	4.82809	8.73989	3.10191	0.00908624	0.0180933	-3.33119	hypothetical protein				sigUp
TGME49_263860	4.82464	8.09252	3.06667	0.00970312	0.0191937	-3.39631	telomere length and silencing protein 1, putative				sigUp
TGME49_244450	4.81607	8.60035	14.3643	5.82837e-09	1.1524e-07	11.1428	protein phosphatase PPM3E, putative				sigUp
TGME49_227300	4.81597	6.52633	3.54013	0.0040266	0.00891741	-2.5177	hypothetical protein				sigUp
TGME49_228710	4.81129	7.56107	3.36154	0.00560473	0.0119142	-2.84963	hypothetical protein				sigUp
TGME49_267360	4.80373	6.61197	3.3209	0.00604423	0.0127333	-2.92516	histone deacetylase SIR2-like				sigUp
TGME49_201660	4.79093	6.45444	15.0778	3.33851e-09	7.77353e-08	11.6795	hypothetical protein				sigUp
TGME49_272905	4.79093	4.89224	12.6618	2.45115e-08	3.59008e-07	9.73762	hypothetical protein				sigUp
TGME49_281530	4.79093	2.0886	4.69844	0.000505705	0.0014945	-0.406241	hypothetical protein				sigUp
TGME49_305570	4.79093	5.9498	13.0195	1.78812e-08	2.72894e-07	10.0486	intraflagellar transport protein IFT81				sigUp
TGME49_500132	4.79093	5.99332	13.7817	9.35988e-09	1.64508e-07	10.6826	hypothetical protein, conserved				sigUp
TGME49_500282	4.79093	4.90243	12.8008	2.16644e-08	3.24439e-07	9.85951	thioredoxin, putative				sigUp
TGME49_233245	4.78531	6.71625	3.43014	0.00493513	0.0106435	-2.72213	hypothetical protein				sigUp
TGME49_307045	4.78529	7.25498	10.3702	2.2641e-07	2.18145e-06	7.51378	Toxoplasma gondii family B protein				sigUp
TGME49_228680	4.77364	9.06004	4.30123	0.00101296	0.00273484	-1.11749	mitochondrial carrier superfamily protein				sigUp
TGME49_268850	4.76901	11.5847	15.5862	2.27704e-09	5.61455e-08	12.0451	enolase 2	ENO2	Tachyzoite		sigUp
TGME49_309130	4.7608	7.80189	2.82164	0.0153183	0.0284951	-3.84618	hypothetical protein				sigUp
TGME49_295380	4.75985	7.28065	3.6099	0.00354057	0.00799828	-2.38814	hypothetical protein				sigUp
TGME49_263800	4.7567	5.91923	3.84325	0.00230877	0.00550814	-1.95591	RNase P subunit p30, putative				sigUp
TGME49_305455	4.73766	7.76286	3.50327	0.0043104	0.00944131	-2.5862	hypothetical protein				sigUp
TGME49_273990	4.72903	6.99314	3.48524	0.00445652	0.00972408	-2.61971	CobW/P47K family protein				sigUp
TGME49_215750	4.72792	6.53829	3.3276	0.00596943	0.0126056	-2.91271	cytidine and deoxycytidylate deaminase zinc-binding region domain-containing protein				sigUp
TGME49_257670	4.7237	8.33924	2.75072	0.0174775	0.0319031	-3.97511	hypothetical protein				sigUp
TGME49_298070	4.70898	6.01869	3.15997	0.00815442	0.0165216	-3.22374	hypothetical protein				sigUp
TGME49_210400	4.70166	9.30726	10.2154	2.66896e-07	2.51694e-06	7.34734	hypothetical protein				sigUp
TGME49_218470	4.69439	9.84248	10.7806	1.47794e-07	1.55106e-06	7.94423	protein disulfide-isomerase, putative				sigUp
TGME49_273390	4.69078	8.99976	3.14094	0.00844881	0.0170146	-3.25898	mitochondrial carrier superfamily protein				sigUp
TGME49_294585	4.68901	10.0543	11.8067	5.38147e-08	6.7666e-07	8.95696	hypothetical protein				sigUp
TGME49_293380	4.68786	5.69941	3.32546	0.00599322	0.0126459	-2.91669	histone lysine acetyltransferase HAT1				sigUp
TGME49_500015	4.67979	6.14678	10.7515	1.52262e-07	1.58546e-06	7.91423	hypothetical protein, conserved				sigUp
TGME49_271420	4.67889	5.91389	5.18266	0.000223018	0.000741571	0.435437	porphobilinogen deaminase				sigUp
TGME49_243100	4.66758	3.84709	6.16637	4.67419e-05	0.000193676	2.04741	Toxoplasma gondii family A protein				sigUp
TGME49_260325	4.65922	5.64339	4.05533	0.00157213	0.00395605	-1.56564	hypothetical protein				sigUp
TGME49_291910	4.61997	5.00969	4.21789	0.00117479	0.00309243	-1.26879	hypothetical protein				sigUp
TGME49_273380	4.61763	6.58078	2.58756	0.0236472	0.0411907	-4.26878	ion channel protein				sigUp
TGME49_234940	4.61462	9.88962	10.7002	1.60498e-07	1.654e-06	7.86114	hypothetical protein				sigUp
TGME49_202568	4.6095	5.92385	3.45639	0.00470092	0.0102072	-2.67333	FAM32A domain-containing protein				sigUp
TGME49_291150	4.59913	7.89373	8.37436	2.23305e-06	1.45421e-05	5.18121	zinc finger (CCCH type) motif-containing protein				sigUp
TGME49_271370	4.58954	7.35654	3.49535	0.00437396	0.00956365	-2.60092	hypothetical protein				sigUp
TGME49_281470	4.58123	11.1963	8.34928	2.30402e-06	1.48471e-05	5.14912	hypothetical protein				sigUp
TGME49_221818	4.57988	5.86799	2.98819	0.011232	0.021775	-3.54101	hypothetical protein				sigUp
TGME49_298960	4.56846	9.39905	8.98797	1.06046e-06	7.79454e-06	5.94371	Toxoplasma gondii family C protein				sigUp
TGME49_215080	4.56048	8.18186	2.64118	0.0214148	0.0377045	-4.17277	hypothetical protein				sigUp
TGME49_209780	4.55936	0.616739	6.90282	1.5832e-05	7.73892e-05	3.16509	hypothetical protein				sigUp
TGME49_266290	4.55936	2.35214	5.92519	6.77089e-05	0.000266209	1.66479	hypothetical protein				sigUp
TGME49_300070	4.55936	5.97943	17.9146	4.51587e-10	1.577e-08	13.5602	hypothetical protein				sigUp
TGME49_221860	4.55936	2.43496	4.0565	0.00156883	0.0039513	-1.5635	hypothetical protein				sigUp
TGME49_269400	4.54663	9.27176	4.05887	0.00156214	0.00393835	-1.55915	oxidoreductase, short chain dehydrogenase/reductase family protein				sigUp
TGME49_251870	4.5438	5.67497	5.79021	8.36096e-05	0.000317185	1.44705	histone H2Bb				sigUp
TGME49_248510	4.53482	8.37576	2.5294	0.0263254	0.0451768	-4.37228	hypothetical protein				sigUp
TGME49_264120	4.52871	7.57683	2.69233	0.0194782	0.034855	-4.08071	Myb family DNA-binding domain-containing protein				sigUp
TGME49_285470	4.52751	11.0729	9.45681	6.15863e-07	4.96477e-06	6.49816	patched family protein				sigUp
TGME49_228350	4.51965	7.74964	2.99074	0.0111788	0.0216982	-3.53632	elongation factor Tu GTP binding domain-containing protein				sigUp
TGME49_269930	4.51854	9.61669	9.02145	1.01937e-06	7.55502e-06	5.98409	calcium-binding egf domain-containing protein CBDP3				sigUp
TGME49_267150	4.5179	5.87634	3.53039	0.00409974	0.00905181	-2.53581	SAG-related sequence SRS38C				sigUp
TGME49_243130	4.51733	6.10053	5.35605	0.000167666	0.000577445	0.729339	Toxoplasma gondii family A protein				sigUp
TGME49_260860	4.51733	3.4438	4.99707	0.000304071	0.000966223	0.116381	hypothetical protein				sigUp
TGME49_224790	4.5136	5.79293	6.69947	2.11944e-05	9.88865e-05	2.86403	SAG-related sequence SRS40A				sigUp
TGME49_225980	4.49074	8.68335	2.676	0.020077	0.0357426	-4.11015	hypothetical protein				sigUp
TGME49_251962	4.4893	4.65447	3.33428	0.00589577	0.0124765	-2.90029	SAG-related sequence SRS59K				sigUp
TGME49_231110	4.48033	8.86824	5.00234	0.000301385	0.000959466	0.125506	COPI associated protein				sigUp
TGME49_312930	4.47852	8.5888	7.02442	1.33319e-05	6.63442e-05	3.34242	cystathione gamma lyase				sigUp
TGME49_214420	4.47193	5.75916	3.85985	0.00223999	0.00537289	-1.92525	hypothetical protein				sigUp
TGME49_254135	4.45853	7.82075	2.95224	0.0120106	0.0230387	-3.60713	hypothetical protein				sigUp
TGME49_316480	4.45747	6.69541	3.14053	0.00845519	0.017021	-3.25973	XRN 5'-3' exonuclease N-terminus protein				sigUp
TGME49_293890	4.45344	6.00134	8.01764	3.50732e-06	2.11524e-05	4.71763	intraflagellar transport 80 family protein				sigUp
TGME49_311155	4.45219	8.00521	2.93295	0.0124502	0.0237454	-3.64255	hypothetical protein				sigUp
TGME49_251570	4.44939	6.18868	4.01222	0.00169925	0.00421884	-1.64473	CAAX amino terminal protease family protein				sigUp
TGME49_247500	4.43821	10.1506	3.63143	0.00340297	0.00772673	-2.34816	acyl-CoA dehydrogenase, middle domain-containing protein				sigUp
TGME49_257170	4.43622	7.23482	3.02809	0.0104267	0.0203919	-3.4675	hypothetical protein				sigUp
TGME49_231770	4.42797	8.51636	9.94392	3.5789e-07	3.18713e-06	7.05	alpha-tubulin I, putative				sigUp
TGME49_244900	4.42797	4.78768	11.7683	5.58094e-08	6.96268e-07	8.92066	dynein light chain type 1, putative				sigUp
TGME49_250685	4.42797	3.93609	8.34553	2.31483e-06	1.49047e-05	5.14432	hypothetical protein				sigUp
TGME49_259290	4.42797	5.68576	8.9198	1.14972e-06	8.34326e-06	5.8611	SAG-related sequence SRS26C				sigUp
TGME49_259410	4.42797	5.45549	6.77053	1.91285e-05	9.05997e-05	2.96989	SAG-related sequence SRS26A				sigUp
TGME49_269110	4.42797	8.58092	10.8886	1.32384e-07	1.40969e-06	8.05509	ornithine aminotransferase, mitochondrial precursor, putative				sigUp
TGME49_272593	4.42797	4.0515	7.54396	6.5327e-06	3.60538e-05	4.07772	hypothetical protein				sigUp
TGME49_306688	4.42797	1.92606	3.76877	0.00264506	0.00619764	-2.09361	hypothetical protein				sigUp
TGME49_315345	4.42797	3.05169	22.6017	2.93642e-11	2.53879e-09	15.9819	SAG-related sequence SRS52F				sigUp
TGME49_320105	4.42797	1.87501	13.9072	8.43886e-09	1.52804e-07	10.7835	hypothetical protein				sigUp
TGME49_246750	4.4245	7.90657	2.98135	0.0113762	0.022012	-3.55361	hypothetical protein				sigUp
TGME49_254530	4.41817	5.81017	3.6841	0.00308897	0.00709434	-2.25045	hypothetical protein				sigUp
TGME49_202080	4.41538	6.98935	2.71048	0.0188334	0.033929	-4.04795	hypothetical protein				sigUp
TGME49_309300	4.40771	5.51201	4.18308	0.00125009	0.00326486	-1.33216	SAG-related sequence SRS55A				sigUp
TGME49_266340	4.40242	6.33647	3.05133	0.00998471	0.0196282	-3.42464	Toxoplasma gondii family A protein				sigUp
TGME49_269850	4.40142	6.28893	3.5454	0.00398765	0.00885321	-2.50792	protein c21orf59, putative				sigUp
TGME49_216610	4.39796	10.9219	3.73309	0.00282357	0.00656781	-2.15967	ribosomal RNA large subunit methyltransferase J protein				sigUp
TGME49_237595	4.39648	8.02311	3.82943	0.00236767	0.00563056	-1.98144	hypothetical protein				sigUp
TGME49_268250	4.39005	8.58088	2.77932	0.0165726	0.03046	-3.92319	WD domain, G-beta repeat-containing protein				sigUp
TGME49_322200	4.37386	5.81887	3.05166	0.00997857	0.019621	-3.42403	apocytochrome b, putative				sigUp
TGME49_316120	4.35632	4.18035	3.64166	0.0033395	0.00759773	-2.32917	hypothetical protein				sigUp
TGME49_221930	4.32505	5.61629	6.07074	5.40882e-05	0.000219677	1.89668	hypothetical protein				sigUp
TGME49_273150	4.32302	6.2398	2.59303	0.0234096	0.040857	-4.25902	zinc finger, C3HC4 type (RING finger) domain-containing protein				sigUp
TGME49_288880	4.29572	6.28641	3.22385	0.00723981	0.0148529	-3.10532	hypothetical protein				sigUp
TGME49_267760	4.29488	8.17747	2.76931	0.0168839	0.0309468	-3.94138	zinc finger CCHC domain-containing protein				sigUp
TGME49_202480	4.28876	6.64684	2.6884	0.0196208	0.0350751	-4.08781	hypothetical protein				sigUp
TGME49_221665	4.28735	8.94858	4.68487	0.000517681	0.00152595	-0.430255	hypothetical protein				sigUp
TGME49_202880	4.28389	8.08504	2.80245	0.0158748	0.0293664	-3.88112	carrier superfamily protein				sigUp
TGME49_206560	4.28339	5.74477	18.5191	3.06339e-10	1.1986e-08	13.9154	EF hand domain-containing protein				sigUp
TGME49_210678	4.28339	3.32067	3.42832	0.00495185	0.0106738	-2.72552	OTU domain-containing protein OTUD1D				sigUp
TGME49_209960	4.2739	9.84073	5.849	7.62463e-05	0.000293427	1.54221	glycosyltransferase				sigUp
TGME49_204500	4.24939	8.14493	8.62838	1.63284e-06	1.12568e-05	5.5021	hypothetical protein				sigUp
TGME49_208090	4.23774	7.33849	2.89955	0.0132497	0.0250728	-3.7038	5-formyltetrahydrofolate cyclo-ligase				sigUp
TGME49_228020	4.23582	4.8125	4.26171	0.00108661	0.00289654	-1.18916	hypothetical protein				sigUp
TGME49_238410	4.22674	7.39152	2.67447	0.0201341	0.0358203	-4.11291	hypothetical protein				sigUp
TGME49_226450	4.21692	8.29693	5.61859	0.000109732	0.000400878	1.1665	hypothetical protein				sigUp
TGME49_220190	4.20549	5.34516	5.08971	0.000260322	0.000845916	0.276208	hypothetical protein				sigUp
TGME49_212860	4.20029	9.69562	4.5014	0.000711989	0.00200741	-0.756918	hypothetical protein				sigUp
TGME49_202850	4.18861	6.4809	2.73091	0.0181326	0.0328887	-4.011	ATP-binding domain-containing protein				sigUp
TGME49_299230	4.17712	9.22876	3.3645	0.00557406	0.0118584	-2.84414	F-box domain-containing protein				sigUp
TGME49_305790	4.17705	6.54956	6.97436	1.43061e-05	7.07957e-05	3.26966	protein-tyrosine phosphatase, putative				sigUp
TGME49_306710	4.17356	5.09812	3.23858	0.007044	0.0145145	-3.07799	hypothetical protein				sigUp
TGME49_266390	4.1647	7.24317	2.69371	0.0194283	0.0347814	-4.07822	DNA mismatch repair protein, C-terminal domain-containing protein				sigUp
TGME49_222250	4.15358	8.37106	2.66739	0.0204	0.0361669	-4.12566	hypothetical protein				sigUp
TGME49_243500	4.14997	6.96179	6.24623	4.14177e-05	0.000174877	2.17228	CAM kinase, SNF1/AMK1 family ToxPK1				sigUp
TGME49_214430	4.14485	7.13241	10.7433	1.53542e-07	1.59588e-06	7.90579	hypothetical protein				sigUp
TGME49_316690	4.13322	7.69357	7.57209	6.29117e-06	3.49378e-05	4.11652	hypothetical protein				sigUp
TGME49_257625	4.13094	6.98785	2.71895	0.0185397	0.0335132	-4.03264	tetrahydrofolate dehydrogenase/cyclohydrolase, NAD(P)-binding domain-containing protein				sigUp
TGME49_278420	4.12566	5.33518	5.39422	0.000157549	0.000548506	0.793492	Toxoplasma gondii family A protein				sigUp
TGME49_214115	4.1227	1.13219	4.75572	0.000458268	0.0013736	-0.305146	hypothetical protein				sigUp
TGME49_259100	4.1227	4.3803	11.6063	6.51614e-08	7.91938e-07	8.76597	hypothetical protein				sigUp
TGME49_271040	4.1227	3.19388	7.15077	1.11738e-05	5.7097e-05	3.52455	hypothetical protein				sigUp
TGME49_283765	4.1227	3.84105	9.40898	6.5034e-07	5.18005e-06	6.44267	B9 domain-containing protein				sigUp
TGME49_305220	4.1227	4.56655	14.268	6.29518e-09	1.21895e-07	11.0682	C-Myc-binding family protein				sigUp
TGME49_313460	4.1227	0.947446	4.10118	0.0014477	0.00369407	-1.4817	hypothetical protein				sigUp
TGME49_316370	4.1227	6.46161	14.8883	3.86177e-09	8.41487e-08	11.5398	hypothetical protein				sigUp
TGME49_329710	4.1227	5.03517	7.52319	6.71741e-06	3.68808e-05	4.049	SAG-related sequence SRS26I				sigUp
TGME49_255200	4.1227	6.13003	3.93968	0.00193757	0.00474135	-1.77809	Radial spoke head protein 9, putative				sigUp
TGME49_265455	4.1227	6.56008	13.4095	1.27875e-08	2.11883e-07	10.3777	hypothetical protein				sigUp
TGME49_320410	4.1227	1.58915	4.09657	0.00145972	0.0037212	-1.49012	hypothetical protein				sigUp
TGME49_316635	4.1208	9.97691	8.58898	1.71332e-06	1.17006e-05	5.45282	hypothetical protein				sigUp
TGME49_215347	4.11884	6.32701	3.69176	0.00304584	0.00700534	-2.23625	hypothetical protein				sigUp
TGME49_314570	4.10893	9.17503	9.22205	8.06314e-07	6.20605e-06	6.22348	hypothetical protein				sigUp
TGME49_314515	4.10279	5.33461	2.77639	0.0166632	0.0306123	-3.92852	hypothetical protein				sigUp
TGME49_247270	4.0926	8.69298	2.93883	0.0123145	0.0235315	-3.63176	GEX1 domain-containing protein				sigUp
TGME49_243520	4.05081	3.22906	3.48725	0.00444003	0.00969406	-2.61598	hypothetical protein				sigUp
TGME49_239510	4.03928	10.812	9.5768	5.37701e-07	4.44674e-06	6.63633	START domain-containing protein				sigUp
TGME49_242390	4.03207	8.88258	5.15376	0.000233974	0.000771584	0.386056	enoyl-coa hydratase/isomerase family protein				sigUp
TGME49_231998	4.02787	5.24482	4.8736	0.000374699	0.00115338	-0.0983529	hypothetical protein				sigUp
TGME49_202975	4.02787	5.35279	5.62287	0.000108985	0.00039888	1.17354	hypothetical protein				sigUp
TGME49_316320	4.01348	9.43787	9.64359	4.98866e-07	4.18618e-06	6.7126	ABC transporter transmembrane region domain-containing protein				sigUp
TGME49_269430	4.0061	6.9675	6.46583	2.98337e-05	0.000131885	2.51104	heptaprenyl diphosphate synthase COQ1				sigUp
TGME49_315740	3.99975	5.16746	3.08891	0.00930914	0.0184636	-3.35523	SAG-related sequence SRS54				sigUp
TGME49_325300	3.99517	5.33005	3.15329	0.00825654	0.0166863	-3.23611	proteasome subunit alpha type, putative				sigUp
TGME49_223560	3.97972	7.62961	6.56989	2.55964e-05	0.000115843	2.66921	hypothetical protein				sigUp
TGME49_310830	3.9759	9.33663	3.72411	0.00287042	0.00666321	-2.17631	enoyl-CoA hydratase/isomerase family protein				sigUp
TGME49_257130	3.9596	10.9235	2.93886	0.0123139	0.0235315	-3.6317	zinc finger (CCCH type) motif-containing protein				sigUp
TGME49_224680	3.94368	9.51985	2.96249	0.0117831	0.0226896	-3.58828	hypothetical protein				sigUp
TGME49_269582	3.94291	7.644	7.91154	4.02245e-06	2.37745e-05	4.57676	14-3-3 protein				sigUp
TGME49_246210	3.94184	3.52497	6.5675	2.56865e-05	0.000116185	2.66558	hypothetical protein				sigUp
TGME49_224905	3.94184	5.06894	7.74542	4.99816e-06	2.85298e-05	4.35336	hypothetical protein				sigUp
TGME49_259030	3.94184	2.76788	10.1658	2.81449e-07	2.61411e-06	7.29358	hypothetical protein				sigUp
TGME49_329700	3.94184	6.26648	7.96635	3.74693e-06	2.24451e-05	4.64971	SAG-related sequence SRS26J				sigUp
TGME49_500016	3.94184	5.29645	14.7497	4.30048e-09	9.07413e-08	11.4363	hypothetical protein, conserved				sigUp
TGME49_500396	3.94184	5.46036	10.4963	1.98322e-07	1.96772e-06	7.64762	hypothetical protein				sigUp
TGME49_211320	3.94184	7.39955	8.05033	3.36317e-06	2.04527e-05	4.76076	hypothetical protein				sigUp
TGME49_328500	3.94184	3.71668	3.01613	0.010662	0.0208153	-3.48956	hypothetical protein				sigUp
TGME49_500232	3.93095	8.20925	2.65112	0.0210242	0.0371394	-4.15491	PIH1 domain-containing protein				sigUp
TGME49_224010	3.92793	10.2352	5.54572	0.000123313	0.000442118	1.04613	hypothetical protein				sigUp
TGME49_233180	3.92151	6.38046	9.59336	5.27781e-07	4.39195e-06	6.65528	hypothetical protein				sigUp
TGME49_217630	3.91829	5.69591	4.09633	0.00146036	0.00372164	-1.49057	hypothetical protein				sigUp
TGME49_312970	3.90367	10.4194	4.81015	0.000417487	0.00126537	-0.209443	hypothetical protein				sigUp
TGME49_225950	3.90306	10.5852	4.33082	0.00096123	0.00261283	-1.06395	zinc finger (CCCH type) motif-containing protein				sigUp
TGME49_244720	3.8972	7.0651	2.66056	0.0206599	0.036601	-4.13795	hypothetical protein				sigUp
TGME49_319920	3.89122	10.5462	8.3705	2.24382e-06	1.45896e-05	5.17628	2-oxo acid dehydrogenases acyltransferase (catalytic domain) domain-containing protein				sigUp
TGME49_500344	3.87951	7.88723	7.77072	4.83457e-06	2.7775e-05	4.3876	AP2 domain transcription factor AP2X-6				sigUp
TGME49_269910	3.85928	6.19009	2.68648	0.0196909	0.0351727	-4.09128	transcription factor C2H2, putative				sigUp
TGME49_231175	3.8587	4.35822	3.16464	0.0080838	0.0163952	-3.21509	hypothetical protein				sigUp
TGME49_203110	3.85809	8.77861	3.30911	0.0061781	0.0129743	-2.94706	citrate synthase, putative				sigUp
TGME49_231390	3.85264	9.16005	5.50892	0.000130836	0.000465847	0.985059	hypothetical protein				sigUp
TGME49_263690	3.8513	5.44146	2.81475	0.0155159	0.0288118	-3.85874	hypothetical protein				sigUp
TGME49_263540	3.85058	8.63729	2.56189	0.024795	0.0429375	-4.31455	hypothetical protein				sigUp
TGME49_500177	3.84125	7.16916	2.9588	0.0118646	0.0228244	-3.59507	hypothetical protein, conserved				sigUp
TGME49_295640	3.83492	9.56773	4.76518	0.000450894	0.00135404	-0.288491	peptidase family M13 protein				sigUp
TGME49_500376	3.82798	5.33653	2.81719	0.0154455	0.0287117	-3.85428	rhoptry kinase family protein				sigUp
TGME49_214835	3.82798	4.77944	4.65195	0.000547971	0.00160107	-0.488583	hypothetical protein				sigUp
TGME49_226350	3.82576	7.0342	2.65262	0.0209661	0.0370615	-4.15223	hypothetical protein				sigUp
TGME49_500199	3.81607	8.35413	6.2661	4.01953e-05	0.000169895	2.20322	SAG-related sequence				sigUp
TGME49_276810	3.81456	6.81586	3.08998	0.00929061	0.0184451	-3.35325	hypothetical protein				sigUp
TGME49_500360	3.80279	6.6093	2.9538	0.0119756	0.0229772	-3.60425	regulator of chromosome condensation, putative				sigUp
TGME49_259155	3.79908	6.47802	4.11958	0.00140065	0.0035912	-1.44805	hypothetical protein				sigUp
TGME49_327100	3.79732	5.30942	3.12914	0.00863662	0.0173318	-3.28082	U5 small nuclear ribonuclear protein, putative				sigUp
TGME49_293252	3.78573	9.23813	3.62896	0.00341848	0.00775975	-2.35275	hypothetical protein				sigUp
TGME49_223480	3.77835	10.274	9.42622	6.37676e-07	5.1046e-06	6.4627	sushi domain (scr repeat) domain-containing protein				sigUp
TGME49_226300	3.76782	9.5586	4.29402	0.00102599	0.00276258	-1.13055	2,4-dienoyl CoA reductase 2, peroxisomal family protein				sigUp
TGME49_294800	3.76397	13.5225	21.8075	4.48133e-11	3.25792e-09	15.6204	elongation factor 1-alpha (EF-1-ALPHA), putative				sigUp
TGME49_500180	3.76272	5.68076	4.95775	0.000324911	0.00102175	0.0482058	dynein light chain, putative				sigUp
TGME49_248170	3.74529	8.81035	7.76135	4.89451e-06	2.80148e-05	4.37492	peroxisomal protein PEX14, putative				sigUp
TGME49_275760	3.74226	9.25592	2.65044	0.0210507	0.0371781	-4.15614	hypothetical protein				sigUp
TGME49_217855	3.735	1.5183	3.9403	0.0019354	0.0047375	-1.77695	hypothetical protein				sigUp
TGME49_220310	3.735	2.69505	9.18293	8.43779e-07	6.47572e-06	6.17713	hypothetical protein				sigUp
TGME49_243700	3.735	1.61986	4.9226	0.000344804	0.00107378	-0.0128915	hypothetical protein				sigUp
TGME49_255490	3.735	4.60913	7.90304	4.06708e-06	2.39679e-05	4.56541	hypothetical protein				sigUp
TGME49_256850	3.735	5.89196	10.2958	2.44969e-07	2.33718e-06	7.4341	hypothetical protein				sigUp
TGME49_259300	3.735	6.22764	5.90195	7.02001e-05	0.000273715	1.62749	SAG-related sequence SRS26B				sigUp
TGME49_261630	3.735	6.46365	13.9963	7.84489e-09	1.44886e-07	10.8546	gamma interferon inducible lysosomal thiol reductase (GILT) protein				sigUp
TGME49_277055	3.735	1.53167	4.42801	0.00080978	0.00224933	-0.888647	hypothetical protein				sigUp
TGME49_290645	3.735	1.10934	5.35675	0.000167474	0.000577279	0.730523	hypothetical protein				sigUp
TGME49_240310	3.73271	6.51579	2.52562	0.0265095	0.0454343	-4.37899	Toxoplasma gondii family E protein				sigUp
TGME49_214150	3.72215	8.83846	5.32193	0.000177287	0.000606833	0.671836	mitochondrial import inner membrane translocase subunit TIM23				sigUp
TGME49_220180	3.70505	5.07709	4.54045	0.000665058	0.00188665	-0.68708	hypothetical protein				sigUp
TGME49_500410	3.69275	6.69427	4.23777	0.0011339	0.00300259	-1.23265	hypothetical protein, conserved				sigUp
TGME49_201100	3.68979	8.65551	4.26598	0.00107838	0.00287797	-1.18141	hypothetical protein				sigUp
TGME49_272415	3.68672	5.22327	4.46991	0.000752353	0.00211034	-0.813373	hypothetical protein				sigUp
TGME49_268350	3.66185	6.91661	2.5888	0.0235932	0.0411146	-4.26657	WD repeat-containing protein				sigUp
TGME49_311830	3.65684	5.62013	6.86274	1.67616e-05	8.10413e-05	3.10621	hypothetical protein				sigUp
TGME49_234420	3.65572	7.92092	3.213	0.00738763	0.0151097	-3.12546	ATPase, AAA family protein				sigUp
TGME49_252080	3.65316	2.34234	3.08147	0.00943916	0.0187122	-3.36898	hypothetical protein				sigUp
TGME49_283882	3.65316	7.72002	5.64383	0.000105403	0.000387364	1.20803	hypothetical protein				sigUp
TGME49_500290	3.64964	5.03973	3.42862	0.00494911	0.0106708	-2.72496	hypothetical protein, conserved				sigUp
TGME49_260840	3.64893	6.7614	7.12227	1.16259e-05	5.89923e-05	3.48365	tetratricopeptide repeat-containing protein				sigUp
TGME49_230555	3.63315	7.29502	3.11224	0.00891296	0.0178014	-3.31209	adenylate cyclase alpha 3				sigUp
TGME49_314750	3.62391	7.80056	8.78309	1.35391e-06	9.55627e-06	5.69388	ribosomal protein L1, putative				sigUp
TGME49_266368	3.60896	4.34195	2.77432	0.0167274	0.0307051	-3.93228	hypothetical protein				sigUp
TGME49_218290	3.60649	7.03997	4.88765	0.00036586	0.00112885	-0.0738195	WD domain, G-beta repeat-containing protein				sigUp
TGME49_272540	3.58339	9.58475	4.40286	0.000846418	0.00233649	-0.933911	protein kinase (incomplete catalytic triad)				sigUp
TGME49_272020	3.56898	6.72157	2.79583	0.0160717	0.0296894	-3.89318	hypothetical protein				sigUp
TGME49_262540	3.56598	7.8234	6.88059	1.63406e-05	7.939e-05	3.13246	protein kinase, putative				sigUp
TGME49_500267	3.56447	8.08674	2.62501	0.0220653	0.0387624	-4.20178	intraflagellar transport protein IFT140, putative				sigUp
TGME49_266870	3.56034	8.08468	2.62492	0.0220689	0.0387624	-4.20194	transporter, major facilitator family protein				sigUp
TGME49_249510	3.55991	9.0163	11.7665	5.59056e-08	6.96381e-07	8.91894	hypothetical protein				sigUp
TGME49_225990	3.5506	8.67399	9.50459	5.83368e-07	4.7604e-06	6.55336	acyl transferase domain-containing protein				sigUp
TGME49_308960	3.53579	8.40273	8.2567	2.58758e-06	1.63193e-05	5.03001	ATPase, AAA family protein				sigUp
TGME49_291160	3.52409	6.45802	3.52032	0.00417667	0.00919119	-2.55451	dynein light polypeptide 4, axonemal, putative				sigUp
TGME49_251958	3.52378	4.96369	6.84813	1.71148e-05	8.25496e-05	3.08469	SAG-related sequence SRS59B				sigUp
TGME49_259670	3.52154	6.9873	3.89926	0.00208507	0.00504824	-1.85256	von Willebrand factor type A domain-containing protein				sigUp
TGME49_313210	3.52154	6.09811	4.95719	0.000325216	0.00102231	0.0472417	hypothetical protein				sigUp
TGME49_259150	3.51208	6.49825	4.05474	0.0015738	0.00395901	-1.56672	hypothetical protein				sigUp
TGME49_240240	3.51147	6.81718	5.62786	0.00010812	0.000396076	1.18177	subtilisin SUB5				sigUp
TGME49_257800	3.50936	7.23577	3.23466	0.00709567	0.0145947	-3.08528	polynucleotide adenylyltransferase				sigUp
TGME49_229170	3.50531	5.84978	2.92368	0.012667	0.0241017	-3.65955	formate/nitrite transporter FNT3				sigUp
TGME49_316580	3.49847	4.27944	2.9681	0.0116607	0.0224818	-3.57797	hypothetical protein				sigUp
TGME49_500045	3.49762	9.63827	6.38074	3.38514e-05	0.000146567	2.38059	endo-1,3(4)-beta-glucanase, putative				sigUp
TGME49_212075	3.49348	7.68651	11.7413	5.72624e-08	7.05984e-07	8.89501	meiosis-specific nuclear structural protein 1, putative				sigUp
TGME49_212240	3.49348	6.92371	8.67236	1.54779e-06	1.07259e-05	5.55689	beta-1 tubulin, putative	β_Tubulin	EES5		sigUp
TGME49_212740	3.49348	5.81862	8.04467	3.38764e-06	2.05546e-05	4.75331	aromatic amino acid hydrolase AAH2				sigUp
TGME49_224780	3.49348	2.85039	5.041	0.000282438	0.000906725	0.192304	SAG-related sequence SRS40B [Source:UniProtKB/TrEMBL;Acc:S8EU84]				sigUp
TGME49_267290	3.49348	1.50597	4.0926	0.00147019	0.00374311	-1.4974	hypothetical protein				sigUp
TGME49_273985	3.49348	1.32199	6.94328	1.49487e-05	7.36115e-05	3.22432	hypothetical protein				sigUp
TGME49_293372	3.49348	3.35881	7.02383	1.33429e-05	6.63578e-05	3.34156	TIP49 family protein				sigUp
TGME49_294210	3.49348	6.07052	6.96302	1.45371e-05	7.18946e-05	3.25313	G-protein gamma-like domain-containing protein				sigUp
TGME49_294285	3.49348	1.81336	4.28179	0.00104851	0.00281091	-1.15273	hypothetical protein				sigUp
TGME49_307450	3.49348	1.01318	8.09945	3.15836e-06	1.93326e-05	4.82532	hypothetical protein				sigUp
TGME49_325400	3.49348	3.31615	6.1571	4.74051e-05	0.000196018	2.03286	ribosomal L37ae family protein				sigUp
TGME49_326400	3.49348	0.969769	3.67509	0.0031405	0.00720649	-2.26716	ribosomal protein L10-like, putative				sigUp
TGME49_500070	3.49348	3.98477	6.3394	3.60069e-05	0.000154644	2.31685	coiled-coil domain-containing protein, putative				sigUp
TGME49_223550	3.47481	8.62185	16.108	1.55553e-09	4.17435e-08	12.4066	hypothetical protein				sigUp
TGME49_204160	3.47111	9.26308	3.98521	0.00178424	0.00439844	-1.69434	GYF domain-containing protein				sigUp
TGME49_229320	3.47063	10.0058	3.2438	0.00697593	0.0143965	-3.06831	Cof family hydrolase subfamily protein				sigUp
TGME49_215500	3.46235	9.19337	8.89187	1.18858e-06	8.59407e-06	5.82711	TPR repeat-containing protein				sigUp
TGME49_293390	3.45869	8.02768	6.03536	5.71076e-05	0.000230302	1.8406	cytochrome C-type heme lyase, putative				sigUp
TGME49_244480	3.44645	5.35045	3.85368	0.00226533	0.00542552	-1.93665	peptidase M16 inactive domain-containing protein				sigUp
TGME49_320090	3.44257	10.6509	10.4307	2.12429e-07	2.07423e-06	7.5782	hypothetical protein				sigUp
TGME49_202800	3.44102	7.90104	6.34372	3.57748e-05	0.000154061	2.32352	cytochrome c oxidase assembly protein COX11 protein, putative				sigUp
TGME49_315970	3.43915	10.1903	6.52453	2.73593e-05	0.000122848	2.60044	lipoxygenase-like enzyme LOXL1				sigUp
TGME49_202110	3.43218	12.6895	3.68588	0.0030789	0.00707323	-2.24715	hypothetical protein				sigUp
TGME49_255500	3.43033	6.67294	2.63365	0.0217154	0.0381918	-4.18629	tetratricopeptide repeat-containing protein				sigUp
TGME49_276230	3.42947	4.87816	2.57675	0.0241242	0.0418847	-4.28807	Toxoplasma gondii family B protein				sigUp
TGME49_232350	3.42842	14.719	15.6991	2.09487e-09	5.30149e-08	12.1244	lactate dehydrogenase LDH1				sigUp
TGME49_209095	3.4216	3.27365	3.65265	0.00327272	0.0074621	-2.30879	hypothetical protein				sigUp
TGME49_500213	3.4216	6.38543	5.70767	9.52398e-05	0.000353754	1.31264	LisH domain-containing protein, putative				sigUp
TGME49_272270	3.40934	7.71104	3.33831	0.00585184	0.0123933	-2.89281	radical SAM domain-containing protein				sigUp
TGME49_244350	3.39325	7.76761	4.50978	0.000701642	0.0019806	-0.741928	DnaJ domain-containing protein				sigUp
TGME49_500127	3.3777	8.66317	3.62538	0.00344107	0.00780133	-2.35939	hypothetical protein, conserved				sigUp
TGME49_319935	3.37567	4.57354	2.828	0.015138	0.0282187	-3.83458	hypothetical protein				sigUp
TGME49_257580	3.36373	5.48712	3.17284	0.00796123	0.016163	-3.19989	hypothetical protein				sigUp
TGME49_284550	3.36371	6.90394	3.00881	0.0108084	0.0210662	-3.50304	EF hand domain-containing protein				sigUp
TGME49_210210	3.35622	10.1525	3.19943	0.00757667	0.0154528	-3.15062	hypothetical protein				sigUp
TGME49_311765	3.34026	9.21925	7.02974	1.32326e-05	6.60147e-05	3.35012	hypothetical protein				sigUp
TGME49_217880	3.32706	8.60795	7.11278	1.17806e-05	5.96263e-05	3.47001	RNA-binding protein Nova-1, putative				sigUp
TGME49_313940	3.32119	8.53674	2.64123	0.0214129	0.0377045	-4.17269	hypothetical protein				sigUp
TGME49_313240	3.30769	7.8528	3.61298	0.00352053	0.00795526	-2.38241	ethylene-responsive RNA helicase, putative				sigUp
TGME49_313220	3.30734	6.7915	2.54626	0.02552	0.0439645	-4.34234	hypothetical protein				sigUp
TGME49_236050	3.3055	7.24338	3.77646	0.00260812	0.00612005	-2.07938	fructose-bisphosphate aldolase, putative				sigUp
TGME49_235890	3.30413	7.54837	5.63994	0.000106058	0.000389056	1.20164	dual-specificity protein phosphatase				sigUp
TGME49_274080	3.29954	7.98863	6.06993	5.41555e-05	0.000219727	1.8954	PIH1 domain-containing protein				sigUp
TGME49_230640	3.28998	7.23001	2.69135	0.0195137	0.0348951	-4.08248	hypothetical protein				sigUp
TGME49_500333	3.26754	7.27628	2.7372	0.017922	0.0325659	-3.99962	tetratricopeptide repeat-containing protein				sigUp
TGME49_217420	3.2637	8.30077	9.38614	6.67524e-07	5.30109e-06	6.41609	hypothetical protein				sigUp
TGME49_228490	3.26056	8.02529	6.42557	3.16677e-05	0.000138462	2.44944	protein BCP1, putative				sigUp
TGME49_218130	3.25729	4.35407	3.42179	0.00501211	0.0107875	-2.73765	hypothetical protein				sigUp
TGME49_268240	3.25046	5.43356	3.10569	0.0090224	0.0179751	-3.3242	hypothetical protein				sigUp
TGME49_231600	3.24512	10.3831	9.05205	9.83299e-07	7.3387e-06	6.02089	HEAT repeat-containing protein				sigUp
TGME49_237070	3.24427	12.0205	8.59794	1.69465e-06	1.16286e-05	5.46404	hypothetical protein				sigUp
TGME49_305230	3.24164	8.35231	3.75616	0.00270676	0.00631814	-2.11694	hypothetical protein				sigUp
TGME49_273280	3.23686	8.04584	10.3872	2.22399e-07	2.1584e-06	7.53185	hypothetical protein				sigUp
TGME49_500335	3.2295	5.33229	3.4346	0.00489457	0.0105675	-2.71385	CFAP53 domain-containing protein				sigUp
TGME49_277240	3.21933	8.80711	5.21195	0.000212463	0.000709423	0.485369	NTPase I				sigUp
TGME49_229460	3.21511	9.3522	5.23263	0.000205329	0.000688765	0.520548	SWI2/SNF2-containing protein				sigUp
TGME49_275360	3.21509	6.73867	2.64651	0.0212046	0.0374004	-4.16321	SAG-related sequence SRS47B				sigUp
TGME49_211860	3.21263	10.1881	7.19101	1.05672e-05	5.42401e-05	3.5821	hypothetical protein				sigUp
TGME49_219610	3.20411	8.75236	2.54044	0.0257956	0.0443438	-4.3527	hypothetical protein				sigUp
TGME49_220585	3.20362	5.16409	2.67637	0.0200635	0.0357265	-4.1095	hypothetical protein				sigUp
TGME49_222700	3.20322	6.17762	7.11354	1.17682e-05	5.96012e-05	3.4711	hypothetical protein				sigUp
TGME49_500034	3.20322	1.47592	3.89769	0.002091	0.00505953	-1.85544	hypothetical protein, conserved				sigUp
TGME49_202065	3.20322	2.86727	3.00942	0.0107961	0.0210502	-3.50192	hypothetical protein				sigUp
TGME49_202735	3.20322	0.901225	4.04237	0.00160929	0.00403431	-1.5894	hypothetical protein				sigUp
TGME49_216940	3.20322	5.07699	8.30962	2.4212e-06	1.54764e-05	5.09822	hypothetical protein				sigUp
TGME49_217650	3.20322	5.49585	13.6239	1.06738e-08	1.83172e-07	10.5544	GAS8 domain-containing protein				sigUp
TGME49_243560	3.20322	5.25854	5.89269	7.12205e-05	0.000277153	1.6126	coiled-coil domain-containing protein 81, putative				sigUp
TGME49_247310	3.20322	4.77221	8.86689	1.22454e-06	8.79842e-06	5.79663	cpw-wpc domain-containing protein				sigUp
TGME49_261560	3.20322	5.43594	6.7703	1.9135e-05	9.05997e-05	2.96953	Tat binding protein 1(TBP-1)-interacting protein TBPIP				sigUp
TGME49_277830	3.20322	0.941902	3.40589	0.00516208	0.0110822	-2.76721	hypothetical protein				sigUp
TGME49_278565	3.20322	4.85556	11.1853	9.83056e-08	1.09492e-06	8.35418	hypothetical protein				sigUp
TGME49_283490	3.20322	7.18626	6.78336	1.8779e-05	8.92309e-05	2.98892	Alpha-amylase AMY3, putative				sigUp
TGME49_284680	3.20322	2.06762	3.55763	0.00389867	0.00869671	-2.4852	hypothetical protein				sigUp
TGME49_291005	3.20322	4.90189	4.66178	0.000538734	0.00157985	-0.471147	hypothetical protein				sigUp
TGME49_316420	3.20322	3.11866	4.9206	0.000345976	0.00107698	-0.0163804	leucine rich repeat-containing protein				sigUp
TGME49_500019	3.20322	5.22752	6.91235	1.56189e-05	7.6441e-05	3.17907	hypothetical protein, conserved				sigUp
TGME49_500102	3.20322	2.17807	7.4649	7.26613e-06	3.94215e-05	3.96812	hypothetical protein, conserved				sigUp
TGME49_500195	3.20322	1.10184	9.48022	5.99704e-07	4.87076e-06	6.52524	hypothetical protein, conserved				sigUp
TGME49_500299	3.20322	4.11778	9.45366	6.18069e-07	4.97754e-06	6.49451	hypothetical protein				sigUp
TGME49_500359	3.20322	7.22261	9.57962	5.36001e-07	4.44411e-06	6.63956	hypothetical protein, conserved				sigUp
TGME49_500382	3.20322	4.34308	6.93434	1.51393e-05	7.44124e-05	3.21125	hypothetical protein, conserved				sigUp
TGME49_500430	3.20322	4.29097	6.68788	2.15531e-05	0.000100326	2.8467	hypothetical protein, conserved				sigUp
TGME49_227130	3.20322	1.44768	7.52009	6.7454e-06	3.69979e-05	4.04472	hypothetical protein				sigUp
TGME49_242830	3.19083	8.93641	3.49729	0.00435829	0.00953316	-2.59731	XRN 5'-3' exonuclease N-terminus protein				sigUp
TGME49_256788	3.18869	7.28185	2.61545	0.022459	0.0393439	-4.21891	intraflagellar transport 52 (Protein NGD5) family protein				sigUp
TGME49_267690	3.18313	8.05528	3.6022	0.00359111	0.00809873	-2.40242	hypothetical protein				sigUp
TGME49_297880	3.15593	10.9025	8.08296	3.22559e-06	1.96609e-05	4.80368	dense granule protein GRA23				sigUp
TGME49_278518	3.14562	8.68993	5.86362	7.45243e-05	0.000287769	1.56579	N-acetylgalactosaminyl transferase				sigUp
TGME49_215670	3.14562	6.45381	5.72944	9.20151e-05	0.000343994	1.34819	cAMP-dependent protein kinase				sigUp
TGME49_229910	3.14562	3.67982	5.64241	0.000105641	0.000388063	1.20569	EF hand domain-containing protein				sigUp
TGME49_272240	3.14562	5.86293	2.70548	0.0190087	0.0341986	-4.05697	Toxoplasma gondii family D protein				sigUp
TGME49_316235	3.14562	5.22254	4.68425	0.000518229	0.001527	-0.43134	hypothetical protein				sigUp
TGME49_272730	3.14117	8.85497	9.7361	4.49966e-07	3.84853e-06	6.81749	hypothetical protein				sigUp
TGME49_317830	3.13269	2.42991	2.66758	0.0203927	0.0361669	-4.12531	hypothetical protein				sigUp
TGME49_214600	3.12445	8.29635	3.76297	0.00267325	0.00625087	-2.10434	hypothetical protein				sigUp
TGME49_240755	3.12064	2.43125	2.98879	0.0112194	0.0217559	-3.5399	hypothetical protein				sigUp
TGME49_256080	3.12064	5.57988	4.35812	0.00091592	0.00250243	-1.0146	glycosyltransferase, group 2 family protein				sigUp
TGME49_244530	3.11751	9.7308	7.30396	9.04474e-06	4.74611e-05	3.74249	dense granule protein GRA49				sigUp
TGME49_306050	3.11505	8.94893	5.90533	6.98324e-05	0.000272548	1.63291	FAS1 domain-containing protein				sigUp
TGME49_244510	3.11149	8.26541	9.73486	4.50589e-07	3.84974e-06	6.81609	AP2 domain transcription factor AP2VI-3				sigUp
TGME49_220100	3.11082	9.15238	8.59117	1.70874e-06	1.16873e-05	5.45556	phosphoribosylpyrophosphate synthetase				sigUp
TGME49_318610	3.11056	7.69489	4.53452	0.000671973	0.00190559	-0.697677	AP2 domain transcription factor AP2IV-3				sigUp
TGME49_263740	3.1051	7.7511	6.36418	3.46979e-05	0.000149989	2.35508	ABC transporter transmembrane region domain-containing protein				sigUp
TGME49_243420	3.10006	5.30754	3.11059	0.00894038	0.0178384	-3.31514	hypothetical protein				sigUp
TGME49_246540	3.09765	9.22957	13.7079	9.95073e-09	1.73368e-07	10.6229	cytochrome c1, heme protein				sigUp
TGME49_239090	3.08053	8.26557	6.33518	3.6235e-05	0.000155457	2.31033	SAG-related sequence SRS23				sigUp
TGME49_209970	3.06505	8.85204	3.65523	0.00325721	0.00743801	-2.304	Spc97 / Spc98 family protein				sigUp
TGME49_248610	3.05627	8.94817	3.8044	0.00247831	0.00585843	-2.0277	apicomplexan amino acid transporter ApiAT5-1				sigUp
TGME49_296950	3.03187	9.66107	11.2708	9.03334e-08	1.02613e-06	8.43901	hypothetical protein				sigUp
TGME49_285800	3.03003	9.51374	10.892	1.31928e-07	1.40698e-06	8.05857	transporter, putative				sigUp
TGME49_314885	3.02786	3.58615	2.67299	0.0201894	0.0358868	-4.11558	hypothetical protein				sigUp
TGME49_200430	3.01473	7.80966	6.98326	1.41274e-05	6.99982e-05	3.28262	cytidine and deoxycytidylate deaminase zinc-binding region domain-containing protein				sigUp
TGME49_285670	3.01371	6.71832	2.92842	0.0125556	0.0239179	-3.65085	hypothetical protein				sigUp
TGME49_211690	3.0094	10.1641	10.1668	2.81162e-07	2.61411e-06	7.29461	AAA family protein				sigUp
TGME49_267350	3.00802	9.97549	5.72918	9.20529e-05	0.000343994	1.34777	LSM domain-containing protein				sigUp
TGME49_228190	3.00166	9.45871	5.65927	0.000102844	0.000379356	1.23338	eukaryotic initiation factor-3, subunit 5, putative				sigUp
TGME49_228420	2.99718	7.14023	3.0918	0.00925905	0.0184008	-3.34988	cAMP-dependent protein kinase subunit PKAc2				sigUp
TGME49_246010	2.99366	9.74339	6.45638	3.02537e-05	0.0001333	2.49661	hypothetical protein				sigUp
TGME49_295590	2.98494	6.356	3.32503	0.00599799	0.0126526	-2.91748	hypothetical protein				sigUp
TGME49_500249	2.98493	4.49676	4.79775	0.000426432	0.00128929	-0.231216	cAMP-dependent protein kinase regulatory subunit, putative				sigUp
TGME49_241860	2.98041	8.49034	8.43574	2.06905e-06	1.36859e-05	5.25945	N-acetylglucosaminyl-phosphatidylinositol biosynthetic protein PigA, family GT4 protein				sigUp
TGME49_264225	2.97882	6.75826	4.17923	0.00125873	0.00328419	-1.33918	Toxoplasma gondii family B protein				sigUp
TGME49_319658	2.96812	8.02599	4.38857	0.000868001	0.002387	-0.959661	CBF/Mak21 family protein				sigUp
TGME49_318220	2.96754	3.98345	2.80146	0.0159041	0.0294138	-3.88293	hypothetical protein				sigUp
TGME49_259180	2.96754	9.1086	3.50013	0.00433552	0.00949273	-2.59204	cystathionine beta-synthase				sigUp
TGME49_291930	2.96607	9.94558	7.98318	3.66645e-06	2.1996e-05	4.67203	RNA recognition motif-containing protein				sigUp
TGME49_230110	2.96068	8.85178	5.37562	0.000162396	0.000561471	0.762256	hypothetical protein				sigUp
TGME49_273110	2.95626	6.25953	3.90814	0.00205172	0.00498106	-1.8362	SAG-related sequence SRS30D				sigUp
TGME49_306070	2.94082	6.93761	2.62948	0.0218835	0.0384705	-4.19376	DUF4201 domain-containing protein				sigUp
TGME49_500066	2.93723	8.50027	5.88906	7.16234e-05	0.00027845	1.60677	DUF501 domain-containing protein				sigUp
TGME49_500366	2.93622	7.21044	9.20559	8.21855e-07	6.31352e-06	6.204	hypothetical protein, conserved				sigUp
TGME49_268820	2.92176	9.65039	4.54396	0.000660999	0.00187914	-0.680809	hypothetical protein				sigUp
TGME49_275660	2.92096	9.45371	2.71545	0.0186605	0.0336705	-4.03897	methyltransferase, putative				sigUp
TGME49_272595	2.92096	5.2256	2.90564	0.0131	0.0248426	-3.69263	hypothetical protein				sigUp
TGME49_240880	2.91992	8.66152	14.9453	3.6957e-09	8.11938e-08	11.582	hypothetical protein				sigUp
TGME49_229150	2.91965	8.61215	9.2978	7.38743e-07	5.78056e-06	6.31275	transporter, major facilitator family protein				sigUp
TGME49_239810	2.91457	8.75718	6.46113	3.00417e-05	0.000132585	2.50387	hypothetical protein				sigUp
TGME49_500021	2.90765	6.48704	2.73054	0.018145	0.0328999	-4.01167	hypothetical protein, conserved				sigUp
TGME49_312400	2.90538	7.69557	3.28418	0.00647117	0.0135012	-2.99336	exosomal 3'-5' exoribonuclease complex subunit, putative				sigUp
TGME49_229310	2.89138	7.75646	4.84743	0.000391765	0.00119853	-0.144119	mediator complex subunit MED14				sigUp
TGME49_202960	2.88958	7.8117	10.996	1.18769e-07	1.28178e-06	8.16425	glycine cleavage H-protein				sigUp
TGME49_205470	2.879	12.669	14.0258	7.6581e-09	1.42092e-07	10.878	translation elongation factor 2 family protein, putative				sigUp
TGME49_227940	2.87775	4.61424	2.88622	0.0135827	0.0256544	-3.7282	hypothetical protein				sigUp
TGME49_279000	2.86882	5.70329	4.03683	0.00162545	0.00406845	-1.59957	SAG-related sequence SRS59J				sigUp
TGME49_286660	2.86882	6.44632	3.56504	0.00384574	0.00859062	-2.47144	kinesin, putative				sigUp
TGME49_216390	2.86563	7.41781	4.02445	0.00166214	0.00413956	-1.62227	RNA methyltransferase, TrmH family protein				sigUp
TGME49_251480	2.85993	7.88994	4.29702	0.00102055	0.0027507	-1.12512	DEAD/DEAH box helicase domain-containing protein				sigUp
TGME49_318310	2.85729	9.42863	6.51941	2.7566e-05	0.000123568	2.59267	transketolase				sigUp
TGME49_278790	2.8564	5.99549	3.32393	0.00601026	0.0126751	-2.91952	Tctex2-related light chain				sigUp
TGME49_248140	2.85476	8.95638	8.16116	2.91977e-06	1.81143e-05	4.906	hypothetical protein				sigUp
TGME49_261950	2.85445	10.9692	11.0928	1.07792e-07	1.18408e-06	8.2617	ATP synthase beta subunit ATP-B				sigUp
TGME49_292975	2.84691	7.80127	4.37377	0.000890968	0.00244428	-0.986363	hypothetical protein				sigUp
TGME49_233280	2.84434	9.46949	4.9953	0.000304979	0.000968593	0.113314	hypothetical protein				sigUp
TGME49_203100	2.83948	4.34274	4.29964	0.00101582	0.00274073	-1.12038	hypothetical protein				sigUp
TGME49_215955	2.83948	1.31344	3.38605	0.0053555	0.011433	-2.80408	hypothetical protein				sigUp
TGME49_216155	2.83948	7.63006	5.97958	6.22362e-05	0.00024786	1.7518	hypothetical protein				sigUp
TGME49_236595	2.83948	5.64832	8.6747	1.54338e-06	1.07046e-05	5.55981	ankyrin repeat-containing protein				sigUp
TGME49_236940	2.83948	4.69251	5.57251	0.000118125	0.000426476	1.09047	hypothetical protein				sigUp
TGME49_238505	2.83948	3.5858	6.44797	3.06328e-05	0.000134895	2.48375	hypothetical protein				sigUp
TGME49_239083	2.83948	1.54963	3.16794	0.00803433	0.016299	-3.20898	hypothetical protein				sigUp
TGME49_240365	2.83948	5.66202	6.41477	3.21796e-05	0.000140316	2.43289	hypothetical protein				sigUp
TGME49_242740	2.83948	4.38872	9.47162	6.05588e-07	4.90171e-06	6.51529	hypothetical protein				sigUp
TGME49_264075	2.83948	3.4233	4.85404	0.000387376	0.00118782	-0.132541	hypothetical protein				sigUp
TGME49_277980	2.83948	3.33705	4.43863	0.000794812	0.0022139	-0.869557	dynein light chain				sigUp
TGME49_278310	2.83948	2.45658	8.73838	1.42887e-06	9.98037e-06	5.63874	hypothetical protein				sigUp
TGME49_290923	2.83948	5.52941	6.67554	2.19425e-05	0.000101665	2.82822	hypothetical protein				sigUp
TGME49_307060	2.83948	1.64541	7.42716	7.64674e-06	4.12903e-05	3.91552	hypothetical protein				sigUp
TGME49_310515	2.83948	3.78651	6.41998	3.19313e-05	0.000139386	2.44088	hypothetical protein				sigUp
TGME49_312980	2.83948	5.12127	8.316	2.40191e-06	1.53788e-05	5.10643	flagella associated protein, putative				sigUp
TGME49_313235	2.83948	4.013	6.83821	1.73592e-05	8.36777e-05	3.07006	hypothetical protein				sigUp
TGME49_329000	2.83948	2.46682	3.56232	0.00386505	0.00862652	-2.47648	hypothetical protein				sigUp
TGME49_500030	2.83948	4.92893	8.21308	2.73394e-06	1.71477e-05	4.97352	tubulin-tyrosine ligase, putative				sigUp
TGME49_500129	2.83948	5.71701	14.2846	6.21214e-09	1.20872e-07	11.081	ankyrin repeat-containing protein				sigUp
TGME49_500217	2.83948	4.69183	5.37871	0.00016158	0.000559294	0.767452	hypothetical protein				sigUp
TGME49_500269	2.83948	1.87024	6.50725	2.80643e-05	0.00012531	2.57417	hypothetical protein, conserved				sigUp
TGME49_306380	2.83793	9.6985	8.48099	1.95645e-06	1.30926e-05	5.31682	U1 zinc finger protein				sigUp
TGME49_240810	2.83723	10.4949	8.09853	3.16207e-06	1.93326e-05	4.82411	apicomplexan amino acid transporter ApiAT6-1				sigUp
TGME49_203370	2.82666	8.6942	5.23428	0.000204771	0.000688047	0.523352	Utp12 domain-containing protein				sigUp
TGME49_285840	2.80564	6.87297	4.74221	0.000469023	0.00140059	-0.328958	RAP domain-containing protein				sigUp
TGME49_230900	2.80407	3.99182	4.79502	0.000428431	0.00129485	-0.236019	hypothetical protein				sigUp
TGME49_232140	2.80407	5.23432	3.83144	0.00235903	0.00561296	-1.97773	hypothetical protein				sigUp
TGME49_281560	2.80407	6.0723	4.08478	0.00149098	0.00378639	-1.51169	hypothetical protein				sigUp
TGME49_311815	2.80407	4.18309	4.87777	0.000372052	0.00114611	-0.0910681	hypothetical protein				sigUp
TGME49_318632	2.80407	4.20206	4.04663	0.00159699	0.00400725	-1.5816	hypothetical protein				sigUp
TGME49_315140	2.80064	8.14904	9.74319	4.46439e-07	3.83823e-06	6.82549	WD domain, G-beta repeat-containing protein				sigUp
TGME49_315910	2.79524	10.6545	6.93124	1.52059e-05	7.46938e-05	3.20672	hypothetical protein				sigUp
TGME49_201250	2.79476	9.85162	3.79754	0.00250955	0.00592527	-2.04038	histone lysine methyltransferase, SET, putative				sigUp
TGME49_312250	2.7938	6.65568	6.98369	1.41189e-05	6.99982e-05	3.28324	DNA-directed RNA polymerase III RPC11				sigUp
TGME49_314400	2.78561	11.7707	13.9276	8.29884e-09	1.51043e-07	10.7998	pyruvate dehydrogenase E1 component, beta subunit, putative				sigUp
TGME49_279460	2.77797	5.25131	4.96336	0.000321847	0.00101451	0.0579481	Toxoplasma gondii family B protein				sigUp
TGME49_298840	2.76973	10.3765	4.63326	0.000565985	0.00164349	-0.521754	hypothetical protein				sigUp
TGME49_314875	2.76624	8.66184	3.98852	0.0017736	0.00437627	-1.68826	RIC1 protein				sigUp
TGME49_295440	2.76597	8.04582	7.56446	6.35572e-06	3.52473e-05	4.10601	hypothetical protein				sigUp
TGME49_270670	2.76292	7.48221	6.44157	3.0925e-05	0.000135659	2.47395	hypothetical protein				sigUp
TGME49_222400	2.75199	10.995	14.2041	6.62756e-09	1.27405e-07	11.0183	hypothetical protein				sigUp
TGME49_243390	2.75149	9.82573	3.56351	0.00385659	0.00861243	-2.47428	ER membrane protein complex subunit 7, putative				sigUp
TGME49_252420	2.74044	8.31022	5.41033	0.000153473	0.000536886	0.820514	histone arginine methyltransferase PRMT3				sigUp
TGME49_222170	2.73814	11.7563	11.5206	7.07744e-08	8.43491e-07	8.68337	dense granule protein GRA17				sigUp
TGME49_291590	2.73797	8.62276	14.5991	4.83851e-09	1.00503e-07	11.3226	MYND-like zinc finger protein				sigUp
TGME49_323500	2.73598	2.92126	2.67115	0.0202583	0.0359852	-4.11888	hypothetical protein				sigUp
TGME49_295350	2.72747	10.9243	10.406	2.18021e-07	2.12107e-06	7.55194	nucleoside diphosphate kinase, putative				sigUp
TGME49_269180	2.72719	11.0976	11.1818	9.86431e-08	1.09715e-06	8.35074	MIF4G domain-containing protein				sigUp
TGME49_230135	2.72566	5.77562	2.90116	0.01321	0.0250096	-3.70085	Kinesin-associated protein				sigUp
TGME49_275650	2.72395	11.4857	9.56415	5.45419e-07	4.49662e-06	6.62183	hypothetical protein				sigUp
TGME49_232380	2.71962	8.51904	11.3477	8.37603e-08	9.65474e-07	8.51473	WD domain, G-beta repeat-containing protein				sigUp
TGME49_231130	2.7155	9.80991	6.02344	5.8165e-05	0.000233977	1.82165	peptidase, M28 family protein				sigUp
TGME49_294990	2.7105	6.52113	3.23388	0.00710599	0.0146121	-3.08673	hypothetical protein				sigUp
TGME49_222070	2.70685	9.43211	4.37253	0.000892909	0.00244792	-0.988589	elongation factor Tu GTP binding domain-containing protein				sigUp
TGME49_318710	2.70659	9.51658	16.3277	1.32942e-09	3.666e-08	12.5548	ATP-binding cassette sub-family F member 1				sigUp
TGME49_242625	2.70538	8.00965	6.35296	3.52845e-05	0.000152195	2.33777	ATPase family associated with various cellular activities (AAA) subfamily protein				sigUp
TGME49_236270	2.70318	7.70214	4.00018	0.00173659	0.00429688	-1.66683	RING zinc finger protein				sigUp
TGME49_305630	2.6832	8.32944	12.979	1.85243e-08	2.81632e-07	10.0138	F-box domain-containing protein				sigUp
TGME49_218410	2.67595	12.1936	10.0367	3.23527e-07	2.94005e-06	7.15238	ribosomal protein RPP0				sigUp
TGME49_237450	2.67519	6.31462	8.06936	3.28218e-06	1.99753e-05	4.78581	CAP domain-containing protein				sigUp
TGME49_313970	2.6723	7.80231	4.88184	0.000369488	0.00113865	-0.0839608	Phytanoyl-CoA dioxygenase (PhyH) superfamily protein				sigUp
TGME49_240400	2.67159	7.02667	4.25706	0.00109563	0.00291768	-1.19761	hypothetical protein				sigUp
TGME49_211360	2.6706	8.49578	3.55615	0.00390934	0.0087132	-2.48795	hypothetical protein				sigUp
TGME49_312240	2.66654	7.15946	8.95552	1.10198e-06	8.05532e-06	5.90445	hypothetical protein				sigUp
TGME49_272490	2.66652	7.22564	9.01443	1.02784e-06	7.61075e-06	5.97563	protoporphyrinogen oxidase				sigUp
TGME49_223710	2.66458	10.4521	11.2716	9.02614e-08	1.02613e-06	8.43982	tetratricopeptide repeat-containing protein				sigUp
TGME49_308820	2.66342	5.04387	2.89859	0.0132733	0.0251056	-3.70555	hypothetical protein				sigUp
TGME49_232100	2.64087	6.59646	4.28702	0.00103882	0.00279054	-1.14324	RAP domain-containing protein				sigUp
TGME49_202100	2.64056	11.8978	3.72901	0.00284472	0.00661122	-2.16722	hypothetical protein				sigUp
TGME49_240210	2.64024	8.8605	8.58123	1.72963e-06	1.17818e-05	5.44311	phosphate transporter family protein, putative				sigUp
TGME49_312618	2.63984	8.52017	4.41314	0.00083124	0.00230015	-0.915403	hypothetical protein				sigUp
TGME49_288670	2.63968	8.29393	3.83248	0.00235453	0.00560559	-1.9758	hypothetical protein				sigUp
TGME49_289190	2.63844	7.85244	8.95728	1.09969e-06	8.04598e-06	5.90658	tetratricopeptide repeat-containing protein				sigUp
TGME49_266400	2.63197	7.89582	6.78077	1.88491e-05	8.95107e-05	2.98507	hypothetical protein				sigUp
TGME49_251680	2.62821	10.5439	2.89443	0.0133766	0.0252878	-3.71317	translationally-controlled tumor protein homolog				sigUp
TGME49_249215	2.6242	7.60106	3.25222	0.00686746	0.014191	-3.05268	hypothetical protein				sigUp
TGME49_266740	2.62247	9.75804	2.61327	0.02255	0.039486	-4.22282	RNA recognition motif-containing protein				sigUp
TGME49_235750	2.6217	8.61598	4.21669	0.00117729	0.00309697	-1.27096	ULK kinase				sigUp
TGME49_283740	2.61495	7.10208	6.62583	2.35873e-05	0.000107911	2.7536	RNA recognition motif-containing protein				sigUp
TGME49_319360	2.61465	5.70684	2.73775	0.0179035	0.0325396	-3.99861	SAG-related sequence SRS17A				sigUp
TGME49_318430	2.61444	10.846	10.2086	2.68852e-07	2.52779e-06	7.33994	malate dehydrogenase MDH				sigUp
TGME49_265860	2.61245	9.23357	4.07047	0.00152988	0.00386798	-1.53791	ribonuclease ZC3H12D, putative				sigUp
TGME49_273490	2.60875	12.0974	6.96253	1.45471e-05	7.18995e-05	3.25242	glutamine synthetase, type I, putative				sigUp
TGME49_294898	2.60567	9.07792	12.2175	3.66655e-08	4.91146e-07	9.33877	tetratricopeptide repeat-containing protein				sigUp
TGME49_304480	2.60458	5.53859	3.06506	0.00973234	0.0192429	-3.39929	3-oxo-5-alpha-steroid 4-dehydrogenase				sigUp
TGME49_225280	2.59724	5.63822	4.26663	0.00107713	0.00287702	-1.18022	hypothetical protein				sigUp
TGME49_233100	2.59219	10.2392	11.218	9.51702e-08	1.06593e-06	8.3867	SPFH domain / Band 7 family protein				sigUp
TGME49_202140	2.59172	9.58989	5.33366	0.000173917	0.000596403	0.691618	enoyl-CoA hydratase/isomerase family protein				sigUp
TGME49_315570	2.5867	5.91279	2.5161	0.0269784	0.0461291	-4.39586	histone H1-like protein				sigUp
TGME49_217820	2.58499	11.0769	11.8796	5.02296e-08	6.41671e-07	9.02568	PCI domain-containing protein				sigUp
TGME49_311070	2.58388	10.1239	7.37572	8.20021e-06	4.37181e-05	3.84352	RNA recognition motif-containing protein				sigUp
TGME49_251810	2.58287	13.2019	8.02659	3.46721e-06	2.09738e-05	4.72945	translation initiation factor eIF-5A, putative				sigUp
TGME49_205340	2.58016	12.7732	9.26535	7.66912e-07	5.96595e-06	6.27458	ribosomal protein RPS12				sigUp
TGME49_219520	2.5762	10.3017	7.12382	1.16008e-05	5.89476e-05	3.48587	histone arginine methyltransferase PRMT1				sigUp
TGME49_232190	2.56909	8.01345	3.22206	0.00726402	0.014895	-3.10865	guanine nucleotide exchange factor GBF1				sigUp
TGME49_215328	2.56355	6.1734	3.21548	0.00735357	0.0150554	-3.12086	transporter, putative				sigUp
TGME49_220840	2.56355	7.58178	3.66847	0.00317895	0.00728217	-2.27945	threonine synthase				sigUp
TGME49_215460	2.56102	12.6387	8.33737	2.33855e-06	1.50333e-05	5.13386	ribosomal protein RPS24				sigUp
TGME49_264860	2.56015	8.35483	4.64189	0.000557594	0.00162512	-0.506437	zinc finger, C3HC4 type (RING finger) domain-containing protein				sigUp
TGME49_321680	2.55638	12.8815	14.0607	7.44389e-09	1.39627e-07	10.9055	RNA-binding protein, putative				sigUp
TGME49_294430	2.55553	8.01216	4.29753	0.00101963	0.00274915	-1.1242	protein SDA1, putative				sigUp
TGME49_306540	2.54832	9.87512	3.92825	0.00197817	0.00482594	-1.79914	phosphotransferase enzyme family protein				sigUp
TGME49_315360	2.54398	10.3887	2.71938	0.0185246	0.033501	-4.03185	inner centromere protein INCENP2				sigUp
TGME49_500281	2.543	8.46451	2.77251	0.0167838	0.0307844	-3.93557	hypothetical protein				sigUp
TGME49_211280	2.543	8.25399	2.75853	0.0172256	0.0314864	-3.96094	hypothetical protein				sigUp
TGME49_252255	2.543	6.26111	2.95823	0.0118771	0.022843	-3.59611	hypothetical protein				sigUp
TGME49_227830	2.53681	9.21288	8.22451	2.69476e-06	1.69285e-05	4.98834	mitochondrial inner membrane translocase TIM44, putative				sigUp
TGME49_250060	2.5347	7.5845	3.78321	0.00257615	0.00606383	-2.0669	DNA-directed RNA polymerase I RPA12				sigUp
TGME49_300140	2.53039	11.341	7.05836	1.27117e-05	6.3694e-05	3.39155	elongation factor 1-gamma, putative				sigUp
TGME49_295680	2.52664	9.20663	7.23358	9.96355e-06	5.15385e-05	3.64275	periodic tryptophan protein PWP2, putative				sigUp
TGME49_203600	2.52432	10.8107	8.57844	1.73556e-06	1.18122e-05	5.4396	dense granule protein GRA50				sigUp
TGME49_319580	2.51822	9.04773	3.91083	0.00204169	0.00496122	-1.83122	hypothetical protein				sigUp
TGME49_255690	2.51436	6.8761	3.88034	0.00215804	0.00519659	-1.88746	2-C-methyl-D-erythritol 2,4-cyclodiphosphate synthase domain-containing protein				sigUp
TGME49_285260	2.51357	7.93213	2.91353	0.012909	0.0245268	-3.67818	hypothetical protein				sigUp
TGME49_260170	2.5102	8.11688	11.5401	6.9451e-08	8.33933e-07	8.70224	elongation factor EF-G, putative				sigUp
TGME49_202980	2.50762	8.50231	3.65425	0.00326309	0.00744931	-2.30582	hypothetical protein				sigUp
TGME49_318640	2.50752	8.25037	4.52473	0.000683557	0.00193432	-0.715183	hypothetical protein				sigUp
TGME49_309752	2.50379	11.18	7.28338	9.30368e-06	4.86921e-05	3.7134	succinate-Coenzyme A ligase, beta subunit, putative				sigUp
TGME49_301470	2.50305	6.24593	3.85069	0.00227768	0.00544695	-1.94217	hypothetical protein				sigUp
TGME49_202010	2.50123	10.2301	6.6268	2.35541e-05	0.00010782	2.75505	hypothetical protein				sigUp
TGME49_500039	2.50045	7.73507	5.40671	0.000154379	0.000539347	0.814448	hypothetical protein				sigUp
TGME49_285760	2.49505	8.23215	13.8385	8.93028e-09	1.59055e-07	10.7284	U-snRNP-associated cyclophilin family protein				sigUp
TGME49_286420	2.49098	11.5538	5.42292	0.000150367	0.000526945	0.841588	elongation factor 1-alpha (EF-1-ALPHA), putative				sigUp
TGME49_301480	2.4902	6.90825	3.21489	0.00736158	0.015068	-3.12194	hypothetical protein				sigUp
TGME49_218070	2.48995	8.89079	4.98896	0.000308251	0.000977045	0.102337	hypothetical protein				sigUp
TGME49_243800	2.47916	9.64266	3.98757	0.00177664	0.00438242	-1.69	acyl-CoA synthetase ACS4, putative				sigUp
TGME49_233090	2.47723	7.43954	3.7788	0.00259699	0.00609732	-2.07505	XPG N-terminal domain-containing protein				sigUp
TGME49_268830	2.47637	10.7236	10.2289	2.63062e-07	2.48665e-06	7.36198	ATP synthase subunit delta				sigUp
TGME49_239670	2.46	9.1714	2.76065	0.0171579	0.0313898	-3.9571	hypothetical protein				sigUp
TGME49_263030	2.46	4.50502	2.74456	0.0176785	0.0321965	-3.98627	dynein light chain 8 family E protein				sigUp
TGME49_500188	2.46	5.55018	2.88382	0.0136436	0.0257539	-3.73259	WD repeat-containing protein				sigUp
TGME49_244880	2.4559	9.65079	5.14041	0.000239225	0.000786629	0.363207	DNA-directed RNA polymerase I RPA1				sigUp
TGME49_313660	2.45318	7.61437	3.58993	0.00367318	0.00826286	-2.4252	hypothetical protein				sigUp
TGME49_214270	2.45171	11.6025	6.67148	2.2072e-05	0.000102051	2.82214	translation initiation factor IF-2, putative				sigUp
TGME49_500031	2.44613	8.0966	5.68352	9.89571e-05	0.00036637	1.27313	hypothetical protein, conserved				sigUp
TGME49_236210	2.44499	10.9384	11.3935	8.00851e-08	9.30873e-07	8.55968	cytochrome b-c1 complex subunit 1				sigUp
TGME49_271920	2.44479	10.0101	4.28776	0.00103746	0.00278782	-1.1419	hypothetical protein				sigUp
TGME49_233890	2.44364	9.46025	8.58489	1.72192e-06	1.17415e-05	5.44769	hypothetical protein				sigUp
TGME49_312480	2.44127	9.55765	5.60048	0.000112953	0.000410585	1.13665	uracil phosphoribosyltransferase FUR1, putative				sigUp
TGME49_207440	2.43958	11.5528	8.49706	1.91803e-06	1.28881e-05	5.33715	ribosomal protein RPS4				sigUp
TGME49_232520	2.4382	8.94214	8.36618	2.25594e-06	1.46418e-05	5.17075	brix domain-containing protein				sigUp
TGME49_262750	2.4374	6.41801	4.74896	0.000463617	0.00138703	-0.317059	histone lysine methyltransferase, SET, putative				sigUp
TGME49_221660	2.43042	9.52519	4.94441	0.000332315	0.00104176	0.0250375	DEAD/DEAH box helicase domain-containing protein				sigUp
TGME49_264752	2.42918	6.98604	2.70435	0.0190486	0.0342473	-4.05901	HEAT repeat-containing protein				sigUp
TGME49_249720	2.4266	10.125	8.644	1.60207e-06	1.10732e-05	5.52159	ATP synthase F0 subunit 9, putative				sigUp
TGME49_221160	2.42237	9.92256	4.48758	0.000729422	0.00205105	-0.781686	acetyltransferase, GNAT family protein				sigUp
TGME49_207990	2.4136	8.26161	6.80914	1.80969e-05	8.66072e-05	3.02711	ribosomal RNA large subunit methyltransferase J protein				sigUp
TGME49_225380	2.41127	9.6637	13.9871	7.90443e-09	1.45649e-07	10.8472	hypothetical protein				sigUp
TGME49_290660	2.40817	11.7527	12.842	2.0891e-08	3.13444e-07	9.89535	RNA recognition motif-containing protein				sigUp
TGME49_208820	2.40798	9.42845	4.66669	0.000534187	0.00156939	-0.462452	1-deoxy-D-xylulose-5-phosphate synthase				sigUp
TGME49_320230	2.40333	7.80476	3.68363	0.00309164	0.00709845	-2.25133	SAG-related sequence SRS15C				sigUp
TGME49_308580	2.40309	10.082	4.49795	0.0007163	0.00201841	-0.7631	Lon protease family protein				sigUp
TGME49_261680	2.39833	10.6769	3.97303	0.00182399	0.00449091	-1.71673	hypothetical protein				sigUp
TGME49_311500	2.39557	8.65208	3.8458	0.00229807	0.00548423	-1.9512	ThiF family protein				sigUp
TGME49_301150	2.39473	6.10451	3.79703	0.00251192	0.0059291	-2.04133	SAG-related sequence SRS19B				sigUp
TGME49_269315	2.39411	8.52417	4.07567	0.00151561	0.00383798	-1.52837	hypothetical protein				sigUp
TGME49_299210	2.38913	9.06586	6.39058	3.33588e-05	0.000144747	2.39572	CTP synthase				sigUp
TGME49_310320	2.38852	7.61907	4.23859	0.00113224	0.00299918	-1.23115	calreticulin family protein				sigUp
TGME49_263480	2.3875	8.73825	5.8824	7.23714e-05	0.000280812	1.59605	sodium/hydrogen exchanger 3 protein				sigUp
TGME49_221260	2.38467	9.26512	12.0165	4.4173e-08	5.79101e-07	9.15362	Class-II DAHP synthetase family protein				sigUp
TGME49_253390	2.38269	4.79383	3.29115	0.00638776	0.0133535	-2.9804	hypothetical protein				sigUp
TGME49_234507	2.38269	5.61321	2.58356	0.0238226	0.0414601	-4.27592	hypothetical protein				sigUp
TGME49_289800	2.38235	9.03144	6.23856	4.18999e-05	0.000176355	2.16033	transmembrane emp24 domain-containing protein				sigUp
TGME49_226960	2.37027	10.8213	7.16486	1.09574e-05	5.6103e-05	3.54472	phosphofructokinase PFKII				sigUp
TGME49_205160	2.36785	9.33109	6.49574	2.85443e-05	0.000126957	2.55666	zinc finger CCHC domain-containing protein				sigUp
TGME49_313070	2.36728	9.87053	14.6791	4.54441e-09	9.56358e-08	11.3831	hypothetical protein				sigUp
TGME49_284190	2.36685	10.1403	3.22971	0.00716133	0.014707	-3.09446	pyruvate carboxylase				sigUp
TGME49_228990	2.36455	9.01935	6.10411	5.13945e-05	0.000210339	1.94943	zinc finger (CCCH type) motif-containing protein				sigUp
TGME49_238880	2.36252	8.64952	4.82255	0.000408741	0.00124332	-0.187694	hypothetical protein				sigUp
TGME49_315120	2.3613	8.66034	5.85182	7.59113e-05	0.000292278	1.54675	hypothetical protein				sigUp
TGME49_249490	2.35901	7.95931	2.92158	0.0127169	0.0241905	-3.66342	hypothetical protein				sigUp
TGME49_285825	2.35571	3.21975	4.55954	0.0006433	0.00183522	-0.653002	hypothetical protein				sigUp
TGME49_306860	2.35571	0.953194	3.60948	0.00354328	0.00800216	-2.38891	hypothetical protein				sigUp
TGME49_236840	2.35523	9.6095	11.9718	4.60604e-08	5.98935e-07	9.11198	zinc finger (C-x8-C-x5-C-x3-H)-2, putative				sigUp
TGME49_206520	2.35193	1.28389	4.86836	0.000378051	0.00116235	-0.107504	hypothetical protein				sigUp
TGME49_253770	2.35193	1.44367	3.75741	0.00270059	0.00630559	-2.11464	hypothetical protein				sigUp
TGME49_312120	2.35193	3.55999	5.96175	6.3977e-05	0.00025353	1.72332	hypothetical protein				sigUp
TGME49_202285	2.35193	4.78226	3.17391	0.0079455	0.0161351	-3.19793	EGF family domain-containing protein				sigUp
TGME49_203590	2.35193	3.51163	2.73325	0.018054	0.0327535	-4.00677	hypothetical protein				sigUp
TGME49_205230	2.35193	3.01171	4.093	0.00146913	0.00374159	-1.49666	hypothetical protein				sigUp
TGME49_225955	2.35193	4.15256	5.13265	0.000242336	0.000795876	0.349906	leucine rich repeat-containing protein				sigUp
TGME49_231865	2.35193	2.08772	4.34272	0.000941194	0.00256098	-1.04242	hypothetical protein				sigUp
TGME49_232770	2.35193	1.31675	2.80947	0.015669	0.0290528	-3.86835	hypothetical protein				sigUp
TGME49_233330	2.35193	4.41189	6.60556	2.42955e-05	0.000110707	2.72306	radial spokehead family protein	RSPH	EES5		sigUp
TGME49_243550	2.35193	5.17368	8.20488	2.76242e-06	1.73128e-05	4.96288	H-SHIPPO 1, putative				sigUp
TGME49_248673	2.35193	5.98463	6.68013	2.17968e-05	0.000101283	2.8351	hypothetical protein				sigUp
TGME49_251750	2.35193	3.81684	7.07447	1.24281e-05	6.24295e-05	3.41482	MORN repeat-containing protein				sigUp
TGME49_252090	2.35193	0.6071	6.18799	4.5232e-05	0.000188416	2.08132	hypothetical protein				sigUp
TGME49_259270	2.35193	4.47944	5.74942	8.91566e-05	0.000335207	1.38076	SAG-related sequence SRS26E				sigUp
TGME49_260000	2.35193	4.24371	5.96683	6.34761e-05	0.000251795	1.73144	hypothetical protein				sigUp
TGME49_268835	2.35193	1.13423	3.13361	0.00856505	0.0172097	-3.27256	hypothetical protein				sigUp
TGME49_269470	2.35193	2.43698	6.24333	4.15992e-05	0.000175257	2.16777	hypothetical protein				sigUp
TGME49_271174	2.35193	4.91292	6.21054	4.37128e-05	0.00018283	2.11659	hypothetical protein				sigUp
TGME49_271590	2.35193	6.23248	3.39583	0.00525924	0.0112696	-2.7859	Toxoplasma gondii family D protein				sigUp
TGME49_274280	2.35193	1.42245	2.99438	0.0111031	0.0215776	-3.52962	hypothetical protein				sigUp
TGME49_281030	2.35193	0.961005	3.17031	0.00799885	0.0162311	-3.20458	hypothetical protein				sigUp
TGME49_283480	2.35193	6.56769	7.37036	8.26027e-06	4.39504e-05	3.836	cell-cycle-associated protein kinase DYRK2, putative				sigUp
TGME49_290280	2.35193	0.985861	6.29989	3.82035e-05	0.000162854	2.2557	hypothetical protein				sigUp
TGME49_307603	2.35193	6.54646	4.84215	0.000395306	0.00120705	-0.153362	adenylate kinase				sigUp
TGME49_329500	2.35193	0.688366	5.02194	0.000291617	0.000931335	0.159398	hypothetical protein				sigUp
TGME49_500078	2.35193	4.71317	6.71878	2.06105e-05	9.66698e-05	2.89286	REJ domain-containing protein				sigUp
TGME49_500095	2.35193	4.35351	5.33224	0.000174321	0.000597533	0.689225	hypothetical protein, conserved				sigUp
TGME49_500175	2.35193	4.88969	10.0771	3.09685e-07	2.84334e-06	7.19671	ankyrin repeat-containing protein				sigUp
TGME49_500194	2.35193	4.97853	9.6491	4.95801e-07	4.16483e-06	6.71887	hypothetical protein, conserved				sigUp
TGME49_500244	2.35193	4.49586	4.88408	0.000368085	0.0011352	-0.0800517	RIB43A-like with coiled-coils protein, putative				sigUp
TGME49_500324	2.35193	3.7772	6.64381	2.29776e-05	0.000105483	2.78063	hypothetical protein				sigUp
TGME49_500332	2.35193	4.07101	3.57031	0.00380852	0.00852413	-2.46165	hypothetical protein, conserved				sigUp
TGME49_268600	2.34532	9.12814	3.40472	0.00517326	0.0111002	-2.76938	DNA polymerase epsilon subunit B protein				sigUp
TGME49_253730	2.34398	9.22867	11.3496	8.36002e-08	9.65474e-07	8.51665	importin-beta N-terminal domain-containing protein				sigUp
TGME49_203830	2.33838	11.316	4.31658	0.000985762	0.00267135	-1.08969	FHA domain-containing protein				sigUp
TGME49_301170	2.3376	7.2138	8.33043	2.35893e-06	1.51399e-05	5.12495	SAG-related sequence SRS19D				sigUp
TGME49_310850	2.32441	8.02123	5.1088	0.000252158	0.000824073	0.309007	MYND finger domain-containing protein				sigUp
TGME49_266060	2.3217	13.031	7.38126	8.13864e-06	4.34767e-05	3.85128	ribosomal protein RPSA				sigUp
TGME49_288500	2.32068	9.73569	4.1049	0.00143805	0.00367209	-1.4749	malate:quinone oxidoreductase				sigUp
TGME49_204270	2.31907	8.0327	4.4308	0.00080582	0.00224144	-0.883631	dense granule protein GRA60				sigUp
TGME49_263260	2.31301	11.6516	6.70538	2.10139e-05	9.8159e-05	2.87285	apicomplexan amino acid transporter ApiAT7-2				sigUp
TGME49_227870	2.30955	10.5103	12.4864	2.86914e-08	4.11931e-07	9.5819	Tim10/DDP family zinc finger superfamily protein				sigUp
TGME49_500425	2.30823	9.33215	8.44788	2.03818e-06	1.35152e-05	5.27486	hypothetical protein, conserved				sigUp
TGME49_294620	2.30677	11.0355	10.2882	2.46955e-07	2.35107e-06	7.42593	eukaryotic initiation factor-3, subunit 8, putative				sigUp
TGME49_267600	2.30099	10.0486	4.44815	0.000781633	0.00218194	-0.852448	FHA domain-containing protein				sigUp
TGME49_202750	2.30038	8.80354	10.0055	3.3467e-07	3.0111e-06	7.11804	3' exoribonuclease family, domain 1 domain-containing protein				sigUp
TGME49_248760	2.29931	9.73185	2.67823	0.0199944	0.0356193	-4.10614	subtilisin SUB7				sigUp
TGME49_248890	2.29807	8.5127	4.71601	0.000490634	0.00145642	-0.375193	actin-like protein ALP3b				sigUp
TGME49_264070	2.29521	8.69699	2.53305	0.0261493	0.0448842	-4.36582	F5/8 type C domain-containing protein				sigUp
TGME49_320570	2.29406	10.738	10.3444	2.32673e-07	2.23477e-06	7.48619	elongation factor Tu, putative				sigUp
TGME49_276110	2.29152	7.38356	4.44325	0.000788386	0.0021983	-0.86125	cytochrome b5 family heme/steroid binding domain-containing protein				sigUp
TGME49_263150	2.29079	9.04971	11.8249	5.28912e-08	6.682e-07	8.97422	tetratricopeptide repeat-containing protein				sigUp
TGME49_211410	2.28028	7.78983	5.09957	0.000256071	0.000835155	0.293156	translation initiation factor sui1 protein				sigUp
TGME49_320020	2.28008	12.2799	11.6305	6.36611e-08	7.74883e-07	8.78924	apicomplexan amino acid transporter ApiAT2				sigUp
TGME49_217740	2.27487	7.58531	5.15569	0.000233228	0.00076944	0.389345	3-ketoacyl-(acyl-carrier-protein) reductase				sigUp
TGME49_271390	2.27368	7.04632	4.59979	0.000599806	0.00172787	-0.581257	U3 small nucleolar RNA-associated protein 11, putative				sigUp
TGME49_229180	2.27069	9.96937	11.4921	7.27584e-08	8.60724e-07	8.65571	HEAT repeat-containing protein				sigUp
TGME49_215560	2.26991	8.05887	6.37942	3.39182e-05	0.000146777	2.37855	histone arginine methyltransferase PRMT5				sigUp
TGME49_254480	2.26975	8.77197	7.95996	3.77797e-06	2.2555e-05	4.64123	WD domain, G-beta repeat-containing protein				sigUp
TGME49_249390	2.26926	12.9467	9.57739	5.37345e-07	4.44674e-06	6.63701	glutamate/leucine/phenylalanine/valine dehydrogenase family protein				sigUp
TGME49_225110	2.26897	9.18123	4.91725	0.000347946	0.00108059	-0.0222181	AP2 domain transcription factor AP2X-2				sigUp
TGME49_278020	2.26326	9.08942	2.78825	0.0162997	0.0300543	-3.90696	hypothetical protein				sigUp
TGME49_295658	2.26167	8.7407	4.46301	0.000761516	0.00213379	-0.825763	zinc finger in N-recognin protein				sigUp
TGME49_269980	2.25369	11.1314	9.29109	7.44479e-07	5.80839e-06	6.30486	preprotein translocase Sec61, putative				sigUp
TGME49_219750	2.25138	11.7733	8.14228	2.99066e-06	1.84682e-05	4.88136	cytochrome c, putative				sigUp
TGME49_309120	2.24416	11.546	5.19976	0.000216791	0.000722366	0.464601	ribosomal protein RPL4				sigUp
TGME49_216210	2.24328	7.54186	4.11756	0.00140573	0.00359964	-1.45174	hypothetical protein				sigUp
TGME49_279450	2.24297	9.56716	6.53321	2.70122e-05	0.000121426	2.61362	adenylosuccinate synthetase, putative				sigUp
TGME49_235000	2.24178	10.6758	7.46003	7.31407e-06	3.96278e-05	3.96135	phosphorylase family protein				sigUp
TGME49_251500	2.24147	10.3375	11.4159	7.83546e-08	9.16084e-07	8.58155	eukaryotic initiation factor-3, subunit 3, putative				sigUp
TGME49_300230	2.24009	9.02312	4.08854	0.00148094	0.00376328	-1.50482	nuclease, putative				sigUp
TGME49_288900	2.23765	6.47264	4.75333	0.000460155	0.00137822	-0.309364	Yos1 family protein				sigUp
TGME49_220490	2.23733	8.65765	5.93067	6.7135e-05	0.000264184	1.67358	pre-rRNA-processing protein PNO1, putative				sigUp
TGME49_287180	2.23574	9.00191	10.4485	2.08502e-07	2.04839e-06	7.59706	DNA polymerase V, putative				sigUp
TGME49_220132	2.22966	7.05901	4.06797	0.00153677	0.00388419	-1.54249	hypothetical protein				sigUp
TGME49_209800	2.2294	8.76459	3.58281	0.00372175	0.008358	-2.43843	formate/nitrite transporter FNT1				sigUp
TGME49_289810	2.22635	9.11871	5.8252	7.91413e-05	0.000302675	1.50374	hypothetical protein				sigUp
TGME49_222860	2.22411	12.4571	9.08258	9.48677e-07	7.13694e-06	6.0575	eukaryotic translation initiation factor 3 subunit B, putative				sigUp
TGME49_228360	2.22383	11.9984	13.306	1.39653e-08	2.29323e-07	10.2914	peptidyl-prolyl isomerase FKBP12, putative				sigUp
TGME49_297710	2.21973	8.52817	6.82253	1.77531e-05	8.53708e-05	3.0469	hypothetical protein				sigUp
TGME49_500120	2.21905	6.63457	3.54449	0.00399432	0.00886064	-2.5096	hypothetical protein, conserved				sigUp
TGME49_289830	2.21868	11.5441	9.67768	4.80214e-07	4.05092e-06	6.75135	eukaryotic initiation factor-3, delta subunit, putative				sigUp
TGME49_202740	2.21679	7.30085	4.31243	0.000993039	0.00268867	-1.09721	pseudouridine synthase, putative				sigUp
TGME49_250770	2.21474	13.6453	9.17086	8.55706e-07	6.53589e-06	6.1628	eukaryotic initiation factor-4A, putative				sigUp
TGME49_500085	2.20209	8.52686	7.53001	6.65617e-06	3.66341e-05	4.05844	P-type ATPase, putative				sigUp
TGME49_269300	2.19824	6.9997	6.85559	1.69337e-05	8.17745e-05	3.09567	lipase				sigUp
TGME49_272010	2.19776	8.53722	7.4798	7.12145e-06	3.8768e-05	3.98884	Gar1 protein RNA binding region protein				sigUp
TGME49_270560	2.19679	7.60071	5.91601	6.86813e-05	0.000269106	1.65007	peptidyl-prolyl cis-trans isomerase family 1				sigUp
TGME49_202680	2.19562	12.0871	10.4926	1.99073e-07	1.97272e-06	7.6438	cytochrome b-c1 complex subunit 2				sigUp
TGME49_246690	2.19288	9.6109	9.79864	4.1984e-07	3.65004e-06	6.88791	alpha amylase, catalytic domain-containing protein				sigUp
TGME49_231360	2.17913	7.38333	2.6054	0.0228803	0.0399942	-4.23689	hypothetical protein				sigUp
TGME49_249810	2.17619	8.77365	4.72562	0.000482585	0.00143626	-0.358217	activating signal cointegrator 1 complex subunit 3, putative				sigUp
TGME49_500340	2.17586	5.87663	3.1109	0.00893525	0.0178326	-3.31457	3'5'-cyclic nucleotide phosphodiesterase, putative				sigUp
TGME49_500134	2.1753	9.55558	6.45951	3.01138e-05	0.000132756	2.50139	RNA binding protein, putative				sigUp
TGME49_243298	2.17271	10.2049	5.89612	7.08409e-05	0.000275945	1.61811	metacaspase MCA3, putative				sigUp
TGME49_235970	2.1671	11.3403	8.75015	1.40871e-06	9.89068e-06	5.65328	eukaryotic initiation factor-2 gamma, putative				sigUp
TGME49_248850	2.16385	7.34898	9.00289	1.04194e-06	7.67961e-06	5.96171	methionine aminopeptidase 1b				sigUp
TGME49_203970	2.16181	7.95536	5.45914	0.000141791	0.000501062	0.902137	dolichyl-diphosphooligosaccharide--protein glycosyltransferase				sigUp
TGME49_246978	2.16128	8.35765	2.6727	0.0202002	0.035898	-4.11609	hypothetical protein				sigUp
TGME49_228290	2.15796	9.30149	6.66637	2.22365e-05	0.00010267	2.81448	serine hydrolase ASH1				sigUp
TGME49_279550	2.15645	9.45893	10.6853	1.62986e-07	1.67103e-06	7.84563	hypothetical protein				sigUp
TGME49_209010	2.15574	8.73575	4.71759	0.000489303	0.00145301	-0.372406	elongation factor TS protein				sigUp
TGME49_239100	2.15481	12.5571	9.9202	3.67295e-07	3.26362e-06	7.02367	ribosomal protein RPS7				sigUp
TGME49_310310	2.15473	7.48674	5.28462	0.00018848	0.000639761	0.608752	WD domain, G-beta repeat-containing protein				sigUp
TGME49_270910	2.15461	6.38657	4.40251	0.000846948	0.00233714	-0.934551	glycerol 3-phosphate acyltransferase ATS1				sigUp
TGME49_275990	2.15109	8.8086	4.86202	0.000382152	0.00117226	-0.118592	hypothetical protein				sigUp
TGME49_279390	2.14479	12.6078	8.82682	1.28467e-06	9.14011e-06	5.7476	proliferation-associated protein 2G4, putative				sigUp
TGME49_248250	2.14132	8.8533	8.39682	2.17149e-06	1.42106e-05	5.20989	translation initiation factor IF-2, putative				sigUp
TGME49_221922	2.13927	6.5564	3.66222	0.00321568	0.00735998	-2.29104	NifU family domain-containing protein				sigUp
TGME49_203450	2.13836	8.2045	4.48032	0.000738751	0.00207463	-0.794696	brain colonization protein BCP1				sigUp
TGME49_500092	2.13418	9.27211	4.97595	0.000315081	0.000995144	0.0797976	hypothetical protein, conserved				sigUp
TGME49_270660	2.13317	5.80497	4.47805	0.000741692	0.00208189	-0.798764	hypothetical protein				sigUp
TGME49_307460	2.1308	7.23227	5.8261	7.90291e-05	0.00030239	1.50521	Toxoplasma gondii family B protein				sigUp
TGME49_289330	2.12946	10.5452	7.08019	1.23292e-05	6.19716e-05	3.42307	ubiquitin carboxyl-terminal hydrolase family 2 protein				sigUp
TGME49_253060	2.12775	7.46063	3.89587	0.00209794	0.0050717	-1.8588	WD domain, G-beta repeat-containing protein				sigUp
TGME49_254300	2.12619	8.12804	4.65906	0.000541274	0.00158382	-0.475972	hypothetical protein				sigUp
TGME49_264260	2.12546	4.6616	4.98252	0.000311611	0.00098574	0.091188	hypothetical protein				sigUp
TGME49_316200	2.12512	7.98593	2.72813	0.0182262	0.0330286	-4.01603	phosphoglycerate mutase family protein				sigUp
TGME49_239490	2.12244	11.9445	8.39191	2.18479e-06	1.4286e-05	5.20362	2-oxoisovalerate dehydrogenase subunit alpha				sigUp
TGME49_222000	2.12102	8.37892	6.05168	5.56932e-05	0.000225508	1.86649	ribosome biogenesis protein BRX1, putative				sigUp
TGME49_301390	2.12016	9.85638	3.62873	0.00341991	0.00776079	-2.35317	ribosome biogenesis protein BOP1, putative				sigUp
TGME49_210830	2.11738	6.51576	8.88192	1.20276e-06	8.66531e-06	5.81498	RIO1 family protein				sigUp
TGME49_316140	2.11631	10.4284	8.94833	1.11142e-06	8.11135e-06	5.89574	MGR2 domain-containing protein				sigUp
TGME49_314480	2.11468	8.56036	4.98825	0.000308619	0.000977436	0.10111	hypothetical protein				sigUp
TGME49_227360	2.11355	13.2472	10.5752	1.82655e-07	1.83966e-06	7.7307	ribosomal protein RPL3				sigUp
TGME49_251410	2.10957	7.84322	4.9021	0.000356995	0.00110569	-0.0486077	transmembrane pellicle protein PP1				sigUp
TGME49_245680	2.10074	11.7872	5.82672	7.89528e-05	0.000302263	1.5062	ribosomal protein RPL21				sigUp
TGME49_292310	2.09971	6.52455	2.68715	0.0196665	0.0351369	-4.09007	RNA polymerase Rpb7, N-terminal domain-containing protein				sigUp
TGME49_229290	2.09889	7.04761	5.31344	0.000179771	0.00061411	0.657497	kelch repeat-containing protein				sigUp
TGME49_234600	2.09725	6.42465	5.06403	0.000271745	0.000878038	0.232015	hypothetical protein				sigUp
TGME49_278660	2.09687	10.4142	6.69465	2.13427e-05	9.94624e-05	2.85683	P-type ATPase4				sigUp
TGME49_211390	2.09613	7.82892	8.46377	1.99849e-06	1.33072e-05	5.29502	ubiquitin-activating enzyme, putative				sigUp
TGME49_220330	2.09605	7.88972	4.19536	0.00122297	0.00320343	-1.30979	hypothetical protein				sigUp
TGME49_262040	2.0959	10.6925	11.219	9.508e-08	1.06593e-06	8.38766	SAC3/GANP family protein				sigUp
TGME49_263230	2.0938	10.46	4.63545	0.000563841	0.00163846	-0.517861	apicomplexan amino acid transporter ApiAT7-1				sigUp
TGME49_318410	2.09276	10.8347	11.2348	9.3606e-08	1.05136e-06	8.40333	TCP-1 chaperonin, putative				sigUp
TGME49_203440	2.09268	7.34013	7.50665	6.8685e-06	3.757e-05	4.02609	anaphase-promoting complex subunit APC10				sigUp
TGME49_288380	2.09063	14.1853	9.77229	4.3226e-07	3.7411e-06	6.85829	heat shock protein HSP90				sigUp
TGME49_219310	2.08795	10.5965	6.49436	2.86027e-05	0.000127075	2.55455	DnaK family protein				sigUp
TGME49_261520	2.08708	8.63289	4.56327	0.000639135	0.00182411	-0.646346	nucleolar GTP-binding protein 1, putative				sigUp
TGME49_271100	2.0866	9.84896	4.58311	0.000617451	0.00177108	-0.610976	NUC153 domain-containing protein				sigUp
TGME49_290600	2.08361	10.1685	9.08474	9.46274e-07	7.13229e-06	6.06009	succinyl-CoA-synthetase alpha SCSA				sigUp
TGME49_236950	2.08187	13.1349	7.96253	3.76545e-06	2.25121e-05	4.64464	hypothetical protein				sigUp
TGME49_201680	2.07959	10.4149	9.48202	5.98482e-07	4.86883e-06	6.52731	eukaryotic initiation factor-3 subunit 10, putative				sigUp
TGME49_270570	2.07763	8.3737	3.99255	0.00176073	0.00434854	-1.68086	hypothetical protein				sigUp
TGME49_215260	2.07758	9.02976	7.55054	6.47531e-06	3.57865e-05	4.08681	carbamoylphosphate synthetase				sigUp
TGME49_309570	2.07335	7.26784	3.78002	0.00259119	0.00608925	-2.07279	DEAD/DEAH box helicase domain-containing protein				sigUp
TGME49_315920	2.07082	9.40449	10.2432	2.59075e-07	2.45476e-06	7.37745	DNA-directed RNA polymerase II RPB11A				sigUp
TGME49_203750	2.06987	7.27339	5.25718	0.000197182	0.000666469	0.562254	hypothetical protein				sigUp
TGME49_292035	2.06914	8.2297	2.59047	0.0235205	0.0410236	-4.26358	hypothetical protein				sigUp
TGME49_218800	2.06827	6.708	3.30564	0.00621805	0.0130479	-2.9535	hypothetical protein				sigUp
TGME49_215930	2.06607	6.69914	6.81234	1.8014e-05	8.62624e-05	3.03184	mediator complex subunit MED21				sigUp
TGME49_289590	2.06546	4.63125	3.26971	0.00664769	0.0137975	-3.02023	hypothetical protein				sigUp
TGME49_216290	2.06546	4.06623	2.88587	0.0135917	0.0256654	-3.72885	hypothetical protein				sigUp
TGME49_224575	2.06546	1.08825	2.95795	0.0118833	0.0228495	-3.59663	hypothetical protein				sigUp
TGME49_262440	2.06546	4.41837	3.71239	0.00293274	0.00678227	-2.19802	hypothetical protein				sigUp
TGME49_280725	2.06546	5.61621	3.80598	0.00247118	0.00584502	-2.02478	zinc finger, C2H2 type domain-containing protein				sigUp
TGME49_289660	2.06546	5.95583	3.45285	0.00473189	0.010255	-2.67992	hypothetical protein				sigUp
TGME49_293520	2.06546	1.78476	3.43683	0.00487435	0.0105267	-2.70969	hypothetical protein				sigUp
TGME49_320560	2.06546	5.48292	2.99374	0.0111164	0.0215966	-3.5308	p25-alpha family protein				sigUp
TGME49_329200	2.06546	2.5264	3.10044	0.00911125	0.0181341	-3.33392	hypothetical protein				sigUp
TGME49_500097	2.06546	3.52747	3.15742	0.00819329	0.0165811	-3.22847	hypothetical protein, conserved				sigUp
TGME49_221970	2.06051	9.05434	6.58532	2.50248e-05	0.000113577	2.69252	DUF2423 domain-containing protein				sigUp
TGME49_237140	2.05806	9.00297	13.1046	1.66073e-08	2.59048e-07	10.1213	pyridoxal 5'-phosphate synthase subunit PDX1				sigUp
TGME49_202510	2.05649	8.85639	3.50862	0.00426802	0.00936131	-2.57627	glideosome-associated protein with multiple-membrane spans GAPM1B				sigUp
TGME49_315720	2.05542	8.33157	4.16082	0.00130087	0.00337982	-1.37275	Smg-4/UPF3 family protein				sigUp
TGME49_222020	2.0551	7.45351	3.6245	0.00344666	0.0078092	-2.36103	phosphoglycerate kinase PGKII				sigUp
TGME49_201720	2.05211	8.12207	4.40615	0.000841523	0.00232538	-0.927979	alpha N-terminal protein methyltransferase NTM1				sigUp
TGME49_247550	2.05052	9.63812	9.79849	4.19911e-07	3.65004e-06	6.88774	heat shock protein HSP60				sigUp
TGME49_235660	2.04554	9.41915	10.4417	2.09988e-07	2.05541e-06	7.58988	PAT complex subunit CCDC47, putative				sigUp
TGME49_295040	2.04258	10.2377	7.88124	4.18399e-06	2.45303e-05	4.53627	HEAT repeat-containing protein				sigUp
TGME49_260440	2.04213	10.7811	6.24634	4.14104e-05	0.000174877	2.17247	nuclear factor NF3				sigUp
TGME49_266260	2.03608	8.84885	5.35266	0.000168596	0.000580396	0.723641	hypothetical protein				sigUp
TGME49_243540	2.03539	8.62373	4.35665	0.000918298	0.00250636	-1.01725	U4/U6 small nuclear ribonucleoprotein PRP4, putative				sigUp
TGME49_305520	2.03422	12.1519	7.26493	9.54262e-06	4.98122e-05	3.68726	ribosomal protein RPS2				sigUp
TGME49_273460	2.0328	11.2972	8.26699	2.55429e-06	1.61603e-05	5.0433	eukaryotic translation initiation factor 3 subunit 6 interacting protein				sigUp
TGME49_218580	2.03219	7.1832	4.04713	0.00159554	0.00400488	-1.58068	RNA methyltransferase, TrmH family protein				sigUp
TGME49_261570	2.03089	10.7622	4.28941	0.00103443	0.00278249	-1.13892	ribosomal protein RPL7A				sigUp
TGME49_297530	2.03053	8.53427	5.56822	0.00011894	0.00042903	1.08338	DNA-directed RNA polymerase I RPA2				sigUp
TGME49_274190	2.02504	8.15644	8.41666	2.11862e-06	1.39445e-05	5.23517	eukaryotic initiation factor 2B epsilon subunit, putative				sigUp
TGME49_229210	2.02488	10.5068	6.67375	2.19993e-05	0.00010187	2.82555	small nuclear ribonucleoprotein polypeptide A', putative				sigUp
TGME49_277090	2.02017	10.5996	3.31968	0.00605786	0.0127587	-2.92741	mitochondrial iron transporter MIT				sigUp
TGME49_289940	2.01857	7.88142	6.27657	3.95666e-05	0.000167681	2.2195	uroporphyrinogen decarboxylase				sigUp
TGME49_214120	2.01515	7.10794	3.31925	0.00606277	0.0127634	-2.92822	hypothetical protein				sigUp
TGME49_259200	2.01321	7.2877	8.20399	2.76552e-06	1.73186e-05	4.96173	Na+/H+ exchanger NHE1				sigUp
TGME49_288720	2.01189	12.0976	8.31913	2.39253e-06	1.5331e-05	5.11044	ribosomal protein RPL10				sigUp
TGME49_267040	2.00987	7.76642	3.33324	0.00590721	0.0124874	-2.90223	hypothetical protein				sigUp
TGME49_263820	2.009	8.61229	7.5545	6.44107e-06	3.56465e-05	4.09227	DEAD/DEAH box helicase domain-containing protein				sigUp
TGME49_243340	2.00852	8.15885	3.95121	0.00189751	0.00465328	-1.75687	atypical MEK-related kinase (incomplete catalytic triad)				sigUp
TGME49_278900	2.00803	6.09983	4.17986	0.00125732	0.00328158	-1.33803	protein kinase, putative				sigUp
TGME49_213072	2.00523	8.03544	3.07202	0.00960694	0.0190212	-3.38644	protein SLY1				sigUp
TGME49_313270	2.00165	9.72354	4.92259	0.000344814	0.00107378	-0.0129206	hypothetical protein				sigUp
TGME49_290840	2.00014	7.7522	2.94116	0.0122612	0.0234464	-3.62748	serine protease				sigUp
TGME49_202020	-16.7209	5.77343	-47.9933	3.62166e-15	9.65413e-12	22.1098	DnAK-TPR				sigDown
TGME49_293790	-16.3149	4.80036	-14.8695	3.9184e-09	8.51507e-08	11.5258	hypothetical protein				sigDown
TGME49_207210	-15.1252	6.36389	-19.7752	1.41882e-10	7.09653e-09	14.6095	hypothetical protein				sigDown
TGME49_500205	-14.9947	4.19846	-22.8071	2.63838e-11	2.34435e-09	16.0726	hypothetical protein, conserved				sigDown
TGME49_291040	-14.4884	5.56765	-20.7006	8.28412e-11	5.01879e-09	15.0859	lactate dehydrogenase LDH2	LDH2	Bradyzoite	LDH2	sigDown
TGME49_259020	-14.2667	5.33614	-17.3428	6.59311e-10	2.20607e-08	13.2106	bradyzoite antigen BAG1	BAG1	Bradyzoite	BAG1	sigDown
TGME49_266900	-13.6302	7.11855	-75.3368	1.58266e-17	1.26566e-13	24.1535	cyclin, N-terminal domain-containing protein				sigDown
TGME49_221840	-13.5255	4.94021	-27.5029	2.85664e-12	5.57184e-10	17.8728	hypothetical protein				sigDown
TGME49_280570	-13.4285	4.70411	-20.2872	1.05049e-10	5.83384e-09	14.8766	SAG-related sequence SRS35A	SAG4	Bradyzoite	SAG4	sigDown
TGME49_208730	-13.1364	6.04892	-16.8554	9.18832e-10	2.81529e-08	12.9014	microneme adhesive repeat protein MCP4				sigDown
TGME49_268860	-12.8452	5.60196	-22.9897	2.40068e-11	2.30742e-09	16.1523	enolase 1	ENO1	Bradyzoite	ENO1	sigDown
TGME49_209755	-12.8275	5.64054	-36.5216	9.63058e-14	8.19378e-11	20.2638	cyst matrix protein MAG2	MAG2	Bradyzoite	MAG2	sigDown
TGME49_253330	-12.5856	5.92333	-18.2222	3.70111e-10	1.37027e-08	13.7427	bradyzoite pseudokinase BPK1	BPK1	Bradyzoite	BPK1	sigDown
TGME49_208740	-12.4728	5.42269	-45.3844	7.0929e-15	1.41805e-11	21.7706	microneme adhesive repeat protein MCP3	MCP3	Bradyzoite	MCP3	sigDown
TGME49_216720	-12.4146	8.12224	-7.42537	7.66532e-06	4.13627e-05	3.91302	hypothetical protein				sigDown
TGME49_225560	-12.4052	7.13031	-20.2243	1.08959e-10	6.00926e-09	14.8442	inner membrane complex protein IMC41				sigDown
TGME49_252640	-12.3558	4.87724	-30.4118	8.61119e-13	3.16424e-10	18.7711	P-type ATPase PMA1	PMA1	Bradyzoite	PMA1	sigDown
TGME49_207160	-12.3164	5.40429	-24.4459	1.15944e-11	1.40486e-09	16.7574	SAG-related sequence SRS49D				sigDown
TGME49_258370	-12.2263	4.89491	-27.5413	2.80949e-12	5.57184e-10	17.8856	rhoptry kinase family protein ROP28				sigDown
TGME49_280580	-12.2003	6.68307	-19.4338	1.74084e-10	8.14125e-09	14.4265	SAG-related sequence SRS35B				sigDown
TGME49_314080	-12.1961	4.552	-21.8442	4.39324e-11	3.246e-09	15.6375	hypothetical protein				sigDown
TGME49_293780	-12.0396	6.04081	-19.5323	1.64053e-10	7.734e-09	14.4797	hypothetical protein				sigDown
TGME49_210095	-11.9631	4.75356	-9.97881	3.44525e-07	3.08876e-06	7.08861	rhoptry protein ROP43				sigDown
TGME49_500242	-11.922	4.66011	-31.8563	4.9459e-13	2.06319e-10	19.1676	hypothetical protein, conserved				sigDown
TGME49_252390	-11.9044	5.23968	-19.2425	1.9552e-10	8.63819e-09	14.3221	hypothetical protein				sigDown
TGME49_260190	-11.8401	7.48439	-16.9316	8.71836e-10	2.71055e-08	12.9505	microneme protein MIC13				sigDown
TGME49_262970	-11.8302	5.77682	-20.1219	1.15666e-10	6.2079e-09	14.7913	zinc finger (CCCH type) motif-containing protein				sigDown
TGME49_247440	-11.7947	6.41273	-12.0298	4.36275e-08	5.73831e-07	9.16598	dense granule protein GRA33				sigDown
TGME49_289920	-11.6495	5.25871	-28.7084	1.71318e-12	4.89297e-10	18.2624	hypothetical protein				sigDown
TGME49_270240	-11.6317	6.28262	-15.7787	1.97582e-09	5.07388e-08	12.18	MAG1				sigDown
TGME49_200010	-11.6095	4.61304	-31.8981	4.86883e-13	2.06319e-10	19.1787	dense granule protein GRA20				sigDown
TGME49_290970	-11.5049	6.78328	-10.5401	1.89449e-07	1.89853e-06	7.69384	serine palmitoyltransferase SPT2				sigDown
TGME49_312600	-11.4851	9.80657	-27.7579	2.55921e-12	5.48626e-10	17.9574	heat shock protein HSP21				sigDown
TGME49_258870	-11.3686	7.84396	-23.5373	1.81665e-11	1.91361e-09	16.386	cyst wall protein CST7				sigDown
TGME49_224630	-11.3619	5.88076	-23.744	1.63787e-11	1.81917e-09	16.4723	zinc finger (CCCH type) motif-containing protein				sigDown
TGME49_236870	-11.338	7.41384	-17.5646	5.68536e-10	1.92652e-08	13.3478	dense granule protein GRA42				sigDown
TGME49_215980	-11.2364	4.88344	-33.5493	2.66221e-13	1.3306e-10	19.5958	hypothetical protein				sigDown
TGME49_313050	-11.2071	5.67169	-22.8944	2.52173e-11	2.34435e-09	16.1108	oxidoreductase, short chain dehydrogenase/reductase family protein				sigDown
TGME49_500225	-11.0929	6.34776	-16.0901	1.57577e-09	4.21452e-08	12.3944	hypothetical protein, conserved				sigDown
TGME49_500170	-11.0873	7.19365	-20.4771	9.41403e-11	5.41612e-09	14.9734	hypothetical protein, conserved				sigDown
TGME49_312950	-11.0669	7.31458	-22.8235	2.61602e-11	2.34435e-09	16.0797	RAP-1 family protein				sigDown
TGME49_202620	-10.974	6.72042	-25.2134	8.03276e-12	1.10755e-09	17.0561	dense granule protein GRA64				sigDown
TGME49_218520	-10.9172	6.74874	-35.7077	1.2617e-13	8.40819e-11	20.0906	microneme protein MIC6				sigDown
TGME49_269310	-10.9159	7.76122	-19.7635	1.42871e-10	7.09653e-09	14.6033	zinc finger (CCCH type) motif-containing protein				sigDown
TGME49_220890	-10.8975	5.71441	-17.1743	7.38756e-10	2.39183e-08	13.1049	dense granule protein GRA12A				sigDown
TGME49_220560	-10.8353	6.42575	-23.4666	1.88257e-11	1.93011e-09	16.3563	transmembrane protein TauE, putative				sigDown
TGME49_308096	-10.8293	1.77387	-31.8228	5.00845e-13	2.06319e-10	19.1588	rhoptry kinase family protein (incomplete catalytic triad)				sigDown
TGME49_203790	-10.8261	5.26517	-22.2636	3.50913e-11	2.79177e-09	15.8301	hypothetical protein				sigDown
TGME49_213610	-10.7594	9.76257	-19.6674	1.51292e-10	7.37735e-09	14.5522	hypothetical protein				sigDown
TGME49_320190	-10.7553	7.08448	-30.3842	8.70492e-13	3.16424e-10	18.7632	SAG-related sequence SRS16B				sigDown
TGME49_318660	-10.7142	6.77475	-29.0535	1.48566e-12	4.5402e-10	18.3693	protein phosphatase PPM5B				sigDown
TGME49_314430	-10.6888	6.08448	-29.9509	1.03335e-12	3.59291e-10	18.6381	serine/threonine specific protein phosphatase				sigDown
TGME49_278080	-10.6698	6.41213	-28.3503	1.98978e-12	4.97259e-10	18.1494	Toxoplasma gondii family A protein				sigDown
TGME49_500254	-10.6409	8.66884	-21.0497	6.8024e-11	4.31737e-09	15.2585	poly [ADP-ribose] polymerase, putative				sigDown
TGME49_500347	-10.6139	6.14692	-14.0576	7.46229e-09	1.39627e-07	10.9031	hypothetical protein, conserved				sigDown
TGME49_200360	-10.6114	6.33071	-19.2832	1.90733e-10	8.47476e-09	14.3444	hypothetical protein				sigDown
TGME49_254070	-10.6072	5.68364	-13.9439	8.18851e-09	1.49848e-07	10.8129	hypothetical protein				sigDown
TGME49_226860	-10.5791	5.5102	-12.5824	2.63157e-08	3.81244e-07	9.66742	SAG-related sequence SRS67				sigDown
TGME49_224170	-10.5594	6.11951	-18.6938	2.74449e-10	1.12552e-08	14.0154	SAG-related sequence SRS60A				sigDown
TGME49_245770	-10.5103	4.9184	-18.4701	3.15999e-10	1.22079e-08	13.8871	hypothetical protein				sigDown
TGME49_311100	-10.4962	6.45263	-18.3629	3.38273e-10	1.28817e-08	13.825	bradyzoite formation deficient protein BFD2				sigDown
TGME49_295935	-10.3895	4.90598	-15.8289	1.90452e-09	4.96105e-08	12.2149	KRUF family protein				sigDown
TGME49_267740	-10.3749	6.32217	-19.7659	1.42667e-10	7.09653e-09	14.6046	dense granule protein GRA48				sigDown
TGME49_247530	-10.3726	5.91352	-27.4208	2.96024e-12	5.63643e-10	17.8453	hypothetical protein				sigDown
TGME49_202830	-10.3704	6.0737	-19.7782	1.41631e-10	7.09653e-09	14.6111	Elicitor-responsive protein, putative				sigDown
TGME49_270250	-10.3291	9.58801	-24.6004	1.07588e-11	1.34435e-09	16.8187	dense granule protein GRA1				sigDown
TGME49_500284	-10.3276	6.53277	-25.9567	5.68724e-12	8.94831e-10	17.333	hypothetical protein, conserved				sigDown
TGME49_500000	-10.312	4.66926	-10.4907	1.99474e-07	1.97425e-06	7.64177	hypothetical protein				sigDown
TGME49_500108	-10.235	5.95409	-19.0516	2.19766e-10	9.39823e-09	14.2167	hypothetical protein, conserved				sigDown
TGME49_260400	-10.1744	3.96929	-19.5905	1.58416e-10	7.59978e-09	14.511	hypothetical protein				sigDown
TGME49_266080	-10.1508	7.11637	-12.9172	1.95532e-08	2.9559e-07	9.96058	apical cap protein AC11				sigDown
TGME49_275440	-10.0938	8.13398	-23.3109	2.03701e-11	2.03625e-09	16.2903	dense granule protein GRA6				sigDown
TGME49_203290	-10.0332	6.42993	-19.2161	1.98696e-10	8.68291e-09	14.3076	dense granule protein GRA34				sigDown
TGME49_264660	-9.99754	7.01844	-20.6605	8.47549e-11	5.08643e-09	15.0659	SAG-related sequence SRS44	CST1	Bradyzoite	CST1	sigDown
TGME49_227620	-9.98909	7.68144	-24.3944	1.18881e-11	1.41895e-09	16.7369	dense granule protein GRA2				sigDown
TGME49_212275	-9.95967	5.66727	-25.9097	5.81108e-12	8.94831e-10	17.3158	hypothetical protein				sigDown
TGME49_208030	-9.89194	7.27566	-14.4469	5.45736e-09	1.09654e-07	11.2064	microneme protein MIC4	MIC4	Tachyzoite		sigDown
TGME49_321700	-9.88871	2.04576	-7.76479	4.87238e-06	2.79315e-05	4.37958	Kinase-like domain-containing protein [Source:UniProtKB/TrEMBL;Acc:S8F8L7]				sigDown
TGME49_201260	-9.87809	9.33846	-28.3623	1.97977e-12	4.97259e-10	18.1532	sugar transporter ST3				sigDown
TGME49_232030	-9.87098	5.58614	-13.2297	1.49087e-08	2.41372e-07	10.2272	inner membrane complex protein IMC21				sigDown
TGME49_225830	-9.86935	4.93642	-14.5229	5.13817e-09	1.05359e-07	11.2646	hypothetical protein				sigDown
TGME49_208450	-9.86664	7.30608	-21.2345	6.1362e-11	3.95735e-09	15.3483	protease inhibitor PI2				sigDown
TGME49_204130	-9.85708	8.54893	-26.9604	3.62143e-12	6.73502e-10	17.6887	perforin-like protein PLP1				sigDown
TGME49_207350	-9.80393	6.09618	-21.7779	4.55389e-11	3.28085e-09	15.6066	hypothetical protein				sigDown
TGME49_217530	-9.77631	7.38644	-35.9495	1.16368e-13	8.40819e-11	20.1428	dense granule protein GRA63				sigDown
TGME49_500296	-9.77154	6.49068	-38.5649	5.01342e-14	6.68205e-11	20.6691	KRUF family protein				sigDown
TGME49_275460	-9.74519	5.959	-22.8214	2.61886e-11	2.34435e-09	16.0788	hypothetical protein				sigDown
TGME49_205200	-9.72893	5.7326	-36.4596	9.82862e-14	8.19378e-11	20.2508	hypothetical protein				sigDown
TGME49_224470	-9.71308	2.80513	-16.9137	8.8263e-10	2.71477e-08	12.939	hypothetical protein				sigDown
TGME49_227280	-9.7085	7.81831	-11.3473	8.37863e-08	9.65474e-07	8.51442	dense granule protein GRA3				sigDown
TGME49_257970	-9.64109	2.665	-17.2903	6.83024e-10	2.26645e-08	13.1778	hypothetical protein				sigDown
TGME49_201780	-9.63638	5.93601	-10.0699	3.12097e-07	2.85892e-06	7.18885	microneme protein MIC2				sigDown
TGME49_276930	-9.63414	5.45616	-9.13886	8.88229e-07	6.76492e-06	6.12473	IMP1-like protein, putative				sigDown
TGME49_273860	-9.62142	9.38291	-25.6675	6.49754e-12	9.20711e-10	17.2267	hypothetical protein				sigDown
TGME49_281600	-9.61056	4.48974	-15.2273	2.97959e-09	7.07057e-08	11.7885	hypothetical protein				sigDown
TGME49_314310	-9.60785	4.949	-17.6973	5.20732e-10	1.77204e-08	13.4289	hypothetical protein				sigDown
TGME49_245530	-9.58706	6.86453	-26.6034	4.24406e-12	7.54217e-10	17.5645	hypothetical protein				sigDown
TGME49_278882	-9.54405	5.74772	-14.8273	4.04868e-09	8.70357e-08	11.4943	GDA1/CD39 (nucleoside phosphatase) family protein				sigDown
TGME49_226380	-9.53712	6.78661	-18.6553	2.81158e-10	1.13639e-08	13.9935	dense granule protein GRA35				sigDown
TGME49_200385	-9.50818	8.64597	-18.0544	4.12388e-10	1.47887e-08	13.6436	bradyzoite-formation deficient protein BFD1				sigDown
TGME49_500229	-9.4851	5.06287	-21.3395	5.78932e-11	3.87329e-09	15.3989	hypothetical protein, conserved				sigDown
TGME49_301400	-9.47744	8.23451	-20.4111	9.77854e-11	5.58564e-09	14.9399	hypothetical protein				sigDown
TGME49_308093	-9.43965	6.04108	-13.5147	1.1699e-08	1.98635e-07	10.4648	rhoptry kinase family protein (incomplete catalytic triad)				sigDown
TGME49_203682	-9.39712	3.70304	-18.2234	3.69826e-10	1.37027e-08	13.7434	hypothetical protein				sigDown
TGME49_309930	-9.37419	7.21544	-25.7741	6.18531e-12	9.15999e-10	17.2661	dense granule protein GRA56				sigDown
TGME49_255260	-9.37099	7.68513	-36.3333	1.02461e-13	8.19378e-11	20.2243	apical membrane antigen AMA1				sigDown
TGME49_227430	-9.32167	7.60913	-20.0874	1.18019e-10	6.292e-09	14.7734	amino acid transporter AAT2				sigDown
TGME49_266890	-9.31588	6.98451	-18.6268	2.86232e-10	1.1388e-08	13.9772	hypothetical protein				sigDown
TGME49_225160	-9.31364	5.47114	-37.9682	6.04461e-14	6.90554e-11	20.5549	hypothetical protein				sigDown
TGME49_245428	-9.2163	3.46931	-10.6917	1.61913e-07	1.66429e-06	7.85229	hypothetical protein				sigDown
TGME49_500151	-9.18925	2.64153	-23.3401	2.00708e-11	2.03172e-09	16.3027	hypothetical protein, conserved				sigDown
TGME49_212270	-9.18497	6.75978	-11.8563	5.13455e-08	6.51762e-07	9.00378	CLAMP-linked invasion protein CLIP				sigDown
TGME49_245432	-9.15468	7.06256	-24.0877	1.3813e-11	1.60091e-09	16.6134	dense granule protein GRA19				sigDown
TGME49_500354	-9.09972	8.38038	-15.2887	2.84447e-09	6.79021e-08	11.8329	hypothetical protein, conserved				sigDown
TGME49_247400	-9.09006	6.96682	-8.7506	1.40796e-06	9.89068e-06	5.65383	hypothetical protein				sigDown
TGME49_500198	-9.08148	5.13755	-14.8476	3.98541e-09	8.61387e-08	11.5095	hypothetical protein, conserved				sigDown
TGME49_213050	-9.07036	5.68522	-15.009	3.51909e-09	8.00804e-08	11.629	hypothetical protein				sigDown
TGME49_500233	-9.0537	6.33559	-12.9621	1.88004e-08	2.85288e-07	9.99924	hypothetical protein, conserved				sigDown
TGME49_215530	-9.03253	6.63017	-16.3558	1.30324e-09	3.64406e-08	12.5735	hypothetical protein				sigDown
TGME49_204340	-8.99385	6.97117	-13.8773	8.64887e-09	1.55078e-07	10.7596	dense granule protein GRA54				sigDown
TGME49_500312	-8.95794	5.96524	-16.4092	1.2548e-09	3.54058e-08	12.6092	dense granule protein GRA41				sigDown
TGME49_310780	-8.90315	6.77276	-21.0516	6.79497e-11	4.31737e-09	15.2594	dense granule protein GRA4				sigDown
TGME49_300048	-8.90285	5.20536	-18.0109	4.24157e-10	1.49427e-08	13.6178	hypothetical protein				sigDown
TGME49_323310	-8.89916	2.82667	-10.1168	2.96677e-07	2.74597e-06	7.2402	hypothetical protein				sigDown
TGME49_285250	-8.89577	7.02603	-20.6369	8.59051e-11	5.08643e-09	15.054	hypothetical protein				sigDown
TGME49_288650	-8.8481	8.50797	-13.652	1.04262e-08	1.79308e-07	10.5774	dense granule protein GRA12				sigDown
TGME49_239600	-8.84541	6.91565	-9.71566	4.60309e-07	3.92023e-06	6.79439	rhoptry kinase family protein ROP23 (incomplete catalytic triad)				sigDown
TGME49_205430	-8.83967	6.36925	-35.267	1.46412e-13	9.0066e-11	19.9939	isovaleryl-CoA dehydrogenase				sigDown
TGME49_294200	-8.82145	8.56286	-14.9776	3.60497e-09	8.00804e-08	11.6059	glucose-6-phosphate 1-dehydrogenase				sigDown
TGME49_245490	-8.81651	6.20684	-22.7158	2.7665e-11	2.43118e-09	16.0324	microneme protein MIC8				sigDown
TGME49_216140	-8.79821	9.31235	-19.3799	1.79851e-10	8.28832e-09	14.3972	tetratricopeptide repeat-containing protein ANK1				sigDown
TGME49_250220	-8.79421	4.82537	-14.7809	4.19724e-09	8.92694e-08	11.4597	hypothetical protein				sigDown
TGME49_288000	-8.75367	7.71367	-19.6945	1.48864e-10	7.30346e-09	14.5666	hypothetical protein				sigDown
TGME49_500386	-8.71361	5.72602	-11.7407	5.72944e-08	7.05984e-07	8.89445	hypothetical protein, conserved				sigDown
TGME49_230160	-8.71167	6.84867	-14.0378	7.5838e-09	1.4137e-07	10.8875	RNA-binding protein, putative				sigDown
TGME49_233920	-8.71056	4.85194	-18.1851	3.79028e-10	1.39513e-08	13.7209	zinc finger, C3HC4 type (RING finger) domain-containing protein				sigDown
TGME49_258580	-8.69921	8.20341	-27.7149	2.60695e-12	5.48626e-10	17.9432	rhoptry protein ROP17				sigDown
TGME49_305250	-8.66622	8.72579	-17.021	8.20036e-10	2.60231e-08	13.0076	hypothetical protein				sigDown
TGME49_250710	-8.64982	8.47116	-26.5206	4.40439e-12	7.65693e-10	17.5353	microneme protein MIC10				sigDown
TGME49_216710	-8.62629	5.37562	-12.4799	2.88594e-08	4.1286e-07	9.57612	apicomplexan amino acid transporter ApiAT5-4				sigDown
TGME49_250115	-8.61752	6.43018	-28.5407	1.83714e-12	4.97259e-10	18.2098	hypothetical protein				sigDown
TGME49_278450	-8.59983	5.97664	-12.2945	3.41606e-08	4.69811e-07	9.409	hypothetical protein				sigDown
TGME49_200700	-8.5947	3.00574	-8.45054	2.03148e-06	1.34931e-05	5.27824	Toxoplasma gondii family C protein				sigDown
TGME49_286450	-8.59313	9.84045	-26.8879	3.73934e-12	6.79624e-10	17.6637	dense granule protein GRA5				sigDown
TGME49_295105	-8.57837	6.11597	-11.8081	5.37423e-08	6.7666e-07	8.9583	rhoptry protein, putative				sigDown
TGME49_314700	-8.55288	6.50681	-22.3449	3.36126e-11	2.74612e-09	15.8669	hypothetical protein				sigDown
TGME49_323320	-8.55281	6.07603	-15.6885	2.11121e-09	5.31024e-08	12.1171	hypothetical protein				sigDown
TGME49_311510	-8.55158	7.50529	-14.9813	3.59469e-09	8.00804e-08	11.6086	eIF2 kinase IF2K-B				sigDown
TGME49_226260	-8.54671	6.44252	-15.2281	2.97791e-09	7.07057e-08	11.789	hypothetical protein				sigDown
TGME49_203880	-8.51353	8.21917	-23.2627	2.08761e-11	2.06106e-09	16.2697	hypothetical protein				sigDown
TGME49_233530	-8.5132	8.55927	-12.5398	2.73435e-08	3.93992e-07	9.62952	hypothetical protein				sigDown
TGME49_203688	-8.48327	4.69887	-16.1479	1.51154e-09	4.08371e-08	12.4337	hypothetical protein				sigDown
TGME49_218740	-8.46651	4.38062	-7.48683	7.05424e-06	3.84283e-05	3.99861	membrane protein, putative				sigDown
TGME49_266910	-8.45454	8.48743	-20.3919	9.88727e-11	5.60769e-09	14.9301	cell-cycle-associated protein kinase GSK, putative				sigDown
TGME49_300052	-8.45397	4.04994	-13.1511	1.59523e-08	2.51618e-07	10.1608	hypothetical protein				sigDown
TGME49_203685	-8.44436	4.46912	-17.2746	6.90278e-10	2.27411e-08	13.168	hypothetical protein				sigDown
TGME49_204530	-8.43711	9.18928	-13.0546	1.73443e-08	2.66223e-07	10.0786	microneme protein MIC11				sigDown
TGME49_270170	-8.40696	3.85855	-10.4847	2.00736e-07	1.98184e-06	7.6354	hypothetical protein				sigDown
TGME49_212900	-8.38105	7.23359	-15.8527	1.87171e-09	4.90756e-08	12.2314	hypothetical protein				sigDown
TGME49_316710	-8.37408	6.77752	-17.0838	7.85629e-10	2.51307e-08	13.0476	hypothetical protein				sigDown
TGME49_207130	-8.35597	4.71965	-14.4488	5.44899e-09	1.09654e-07	11.2079	SAG-related sequence SRS49A				sigDown
TGME49_299780	-8.32981	6.68337	-20.5061	9.25847e-11	5.36964e-09	14.9881	dense granule protein GRA76				sigDown
TGME49_297280	-8.32641	2.94862	-22.3057	3.43178e-11	2.77211e-09	15.8492	hypothetical protein				sigDown
TGME49_266920	-8.32017	9.09046	-23.6936	1.67965e-11	1.82323e-09	16.4513	3'5'-cyclic nucleotide phosphodiesterase PDE6				sigDown
TGME49_300055	-8.31914	9.58085	-33.611	2.60427e-13	1.3306e-10	19.6107	hypothetical protein				sigDown
TGME49_277080	-8.30747	7.68761	-15.0742	3.34776e-09	7.77353e-08	11.6769	microneme protein MIC5				sigDown
TGME49_271320	-8.28992	7.23871	-9.78855	4.24551e-07	3.68236e-06	6.87657	hypothetical protein				sigDown
TGME49_215360	-8.27735	4.77416	-18.5144	3.07257e-10	1.1986e-08	13.9127	dense granule protein GRA62				sigDown
TGME49_225150	-8.26206	7.01779	-11.1372	1.03124e-07	1.14222e-06	8.30616	hypothetical protein				sigDown
TGME49_500212	-8.24401	6.43615	-14.9938	3.56026e-09	8.00804e-08	11.6179	hypothetical protein, conserved				sigDown
TGME49_310650	-8.20768	3.60078	-16.9217	8.77796e-10	2.71055e-08	12.9441	hypothetical protein				sigDown
TGME49_282055	-8.20261	8.35404	-16.8054	9.5107e-10	2.85929e-08	12.8692	protein phosphatase PP2C-hn				sigDown
TGME49_293510	-8.15893	9.71799	-18.6478	2.8249e-10	1.13639e-08	13.9892	poly(ADP-ribose) polymerase and DNA-Ligase Zn-finger region domain-containing protein				sigDown
TGME49_268360	-8.15802	4.22564	-13.2246	1.49744e-08	2.41919e-07	10.2229	hypothetical protein				sigDown
TGME49_225790	-8.15061	7.82086	-17.3016	6.77863e-10	2.2587e-08	13.1848	thioredoxin-like protein 2				sigDown
TGME49_278680	-8.1063	4.25635	-18.179	3.80533e-10	1.39513e-08	13.7173	hypothetical protein				sigDown
TGME49_208570	-8.09634	6.92576	-12.3349	3.29232e-08	4.55513e-07	9.44559	ubiquitin conjugating enzyme E2, putative				sigDown
TGME49_230705	-8.09224	4.14233	-16.5195	1.16093e-09	3.36376e-08	12.6823	dense granule protein GRA51				sigDown
TGME49_215220	-8.08746	7.00953	-18.1727	3.8206e-10	1.39513e-08	13.7137	dense granule protein GRA22				sigDown
TGME49_227380	-8.07212	9.56465	-22.9604	2.43718e-11	2.30742e-09	16.1395	hypothetical protein				sigDown
TGME49_214940	-8.05188	7.27581	-12.7651	2.23589e-08	3.3359e-07	9.82837	MIC2-associated protein M2AP				sigDown
TGME49_233030	-8.04754	7.8164	-18.605	2.90189e-10	1.14883e-08	13.9647	gliding-associated protein GAP70				sigDown
TGME49_318750	-7.99322	8.88936	-28.0992	2.21244e-12	5.16951e-10	18.0687	deoxyribose-phosphate aldolase				sigDown
TGME49_237230	-7.9927	7.23328	-16.7283	1.00335e-09	2.99394e-08	12.8191	membrane protein MYR3				sigDown
TGME49_234180	-7.98876	6.71426	-20.7526	8.04268e-11	4.90972e-09	15.1119	hypothetical protein				sigDown
TGME49_235580	-7.95339	4.81801	-10.7666	1.49925e-07	1.56931e-06	7.92981	hypothetical protein				sigDown
TGME49_500178	-7.94901	9.45915	-22.0291	3.97693e-11	3.08772e-09	15.723	hypothetical protein, conserved				sigDown
TGME49_309760	-7.89926	7.61292	-25.9243	5.7724e-12	8.94831e-10	17.3212	dense granule protein GRA55				sigDown
TGME49_224935	-7.89843	7.00501	-22.3426	3.36525e-11	2.74612e-09	15.8659	hypothetical protein				sigDown
TGME49_220240	-7.89688	4.17722	-9.44802	6.22047e-07	5.00163e-06	6.48798	dense granule protein GRA31				sigDown
TGME49_247030	-7.88762	8.80456	-18.2275	3.68842e-10	1.37027e-08	13.7459	hypothetical protein				sigDown
TGME49_322110	-7.85487	3.50379	-9.10955	9.19178e-07	6.96746e-06	6.08976	hypothetical protein				sigDown
TGME49_211630	-7.84759	7.86116	-15.6364	2.19406e-09	5.45811e-08	12.0805	hypothetical protein				sigDown
TGME49_500214	-7.79955	2.43357	-14.4812	5.31086e-09	1.08069e-07	11.2327	hypothetical protein, conserved				sigDown
TGME49_239780	-7.79914	6.18964	-9.53276	5.65076e-07	4.63003e-06	6.58579	hypothetical protein				sigDown
TGME49_289630	-7.79439	6.70458	-21.643	4.90064e-11	3.46818e-09	15.5432	microneme protein MIC16				sigDown
TGME49_240060	-7.72943	5.61587	-10.4433	2.0963e-07	2.05541e-06	7.59161	inhibitor of STAT1 transcription				sigDown
TGME49_290700	-7.68709	6.41916	-10.1085	2.99351e-07	2.76753e-06	7.2311	dense granule protein GRA25	GRA25	Sporulated		sigDown
TGME49_242090	-7.68531	9.80194	-21.8312	4.42434e-11	3.246e-09	15.6314	zinc finger (CCCH type) motif-containing protein				sigDown
TGME49_213067	-7.68016	7.96064	-9.75995	4.38213e-07	3.78035e-06	6.84439	dense granule protein GRA36				sigDown
TGME49_211290	-7.67714	6.09714	-11.895	4.95061e-08	6.35474e-07	9.04014	rhoptry protein ROP15				sigDown
TGME49_224180	-7.67467	6.64642	-20.005	1.23863e-10	6.47405e-09	14.7305	BTB domain-containing protein				sigDown
TGME49_283540	-7.66517	4.55426	-22.2105	3.60968e-11	2.83006e-09	15.806	microneme protein MIC20				sigDown
TGME49_240470	-7.66233	6.33005	-12.7618	2.24257e-08	3.33963e-07	9.82543	hypothetical protein				sigDown
TGME49_232250	-7.66215	12.0979	-28.4109	1.93976e-12	4.97259e-10	18.1687	catalase				sigDown
TGME49_500010	-7.6377	6.92112	-13.4646	1.22047e-08	2.05044e-07	10.4234	hypothetical protein, conserved				sigDown
TGME49_205450	-7.62518	5.734	-19.2335	1.96592e-10	8.63819e-09	14.3172	hypothetical protein				sigDown
TGME49_290870	-7.58371	8.12471	-9.43808	6.29124e-07	5.04888e-06	6.47646	patched family protein				sigDown
TGME49_225290	-7.5711	7.87357	-16.5257	1.15593e-09	3.36143e-08	12.6863	GDA1/CD39 (nucleoside phosphatase) family protein				sigDown
TGME49_227810	-7.52947	5.49682	-11.5465	6.90256e-08	8.30072e-07	8.70839	rhoptry kinase family protein ROP11 (incomplete catalytic triad)				sigDown
TGME49_500158	-7.52387	5.21346	-11.8697	5.07007e-08	6.45626e-07	9.01638	calmodulin-binding protein, putative				sigDown
TGME49_278400	-7.50319	3.47694	-9.93171	3.627e-07	3.22638e-06	7.03645	Toxoplasma gondii family A protein				sigDown
TGME49_280380	-7.50316	8.66755	-14.9854	3.58344e-09	8.00804e-08	11.6116	poly(ADP-ribose) glycohydrolase				sigDown
TGME49_224460	-7.50154	8.26795	-21.6171	4.97019e-11	3.48655e-09	15.5311	aminopeptidase N3				sigDown
TGME49_500251	-7.49779	7.62969	-22.3505	3.35116e-11	2.74612e-09	15.8695	hypothetical protein, conserved				sigDown
TGME49_247960	-7.48541	6.25847	-11.5112	7.14256e-08	8.47691e-07	8.6742	hypothetical protein				sigDown
TGME49_271770	-7.46957	6.88588	-26.4078	4.63362e-12	7.71981e-10	17.4954	hypothetical protein				sigDown
TGME49_275860	-7.45143	6.54322	-8.31235	2.41293e-06	1.5437e-05	5.10173	dense granule protein GRA12B				sigDown
TGME49_300220	-7.43643	8.38457	-18.1077	3.98409e-10	1.44166e-08	13.6752	hypothetical protein				sigDown
TGME49_217520	-7.43392	7.60834	-25.646	6.56252e-12	9.20711e-10	17.2187	hypothetical protein				sigDown
TGME49_500149	-7.41279	4.56693	-8.94814	1.11167e-06	8.11135e-06	5.8955	hypothetical protein, conserved				sigDown
TGME49_209610	-7.40702	6.60665	-8.36912	2.24768e-06	1.46017e-05	5.17451	oocyst wall protein OWP2				sigDown
TGME49_231125	-7.3997	5.70208	-9.11446	9.13912e-07	6.93411e-06	6.09562	hypothetical protein				sigDown
TGME49_225120	-7.36294	7.47462	-24.9493	9.10259e-12	1.17409e-09	16.9548	hypothetical protein				sigDown
TGME49_231090	-7.34658	4.61122	-6.67849	2.18486e-05	0.000101348	2.83265	hypothetical protein				sigDown
TGME49_262630	-7.33455	6.94453	-10.0924	3.04583e-07	2.8094e-06	7.21355	hypothetical protein				sigDown
TGME49_309590	-7.3181	8.06885	-16.4747	1.19817e-09	3.43432e-08	12.6526	rhoptry protein ROP1				sigDown
TGME49_205250	-7.30793	7.80552	-12.0184	4.40936e-08	5.7901e-07	9.15541	rhoptry protein ROP18				sigDown
TGME49_321710	-7.29212	2.85239	-9.13308	8.94237e-07	6.8042e-06	6.11785	Kinase-like domain-containing protein [Source:UniProtKB/TrEMBL;Acc:S8FBM1]				sigDown
TGME49_313910	-7.26529	9.71759	-16.4063	1.25738e-09	3.54058e-08	12.6073	RNA recognition motif 2 protein				sigDown
TGME49_262730	-7.25473	5.24104	-10.7424	1.53688e-07	1.59588e-06	7.90483	rhoptry protein ROP16				sigDown
TGME49_201785	-7.23855	3.00125	-12.2936	3.41915e-08	4.69811e-07	9.4081	hypothetical protein				sigDown
TGME49_271050	-7.23653	8.188	-9.26238	7.69552e-07	5.97486e-06	6.27108	SAG-related sequence SRS34A	SAG2	Tachyzoite		sigDown
TGME49_253180	-7.23459	3.99385	-4.84416	0.000393954	0.00120384	-0.149843	hypothetical protein				sigDown
TGME49_233220	-7.20265	7.60551	-13.1242	1.63275e-08	2.5552e-07	10.138	hypothetical protein				sigDown
TGME49_272380	-7.1982	6.38807	-15.06	3.38421e-09	7.79929e-08	11.6665	hypothetical protein				sigDown
TGME49_236670	-7.18349	6.08345	-12.654	2.46821e-08	3.60407e-07	9.73076	hypothetical protein				sigDown
TGME49_201840	-7.17475	11.8936	-18.4748	3.15048e-10	1.22079e-08	13.8899	aspartyl protease ASP1				sigDown
TGME49_311800	-7.09602	8.02593	-10.0147	3.31328e-07	2.99055e-06	7.12822	endonuclease/exonuclease/phosphatase family protein				sigDown
TGME49_221590	-7.07456	7.78592	-19.2034	2.0024e-10	8.70284e-09	14.3006	dual specificity phosphatase, catalytic domain-containing protein				sigDown
TGME49_247520	-7.06464	8.0427	-12.2441	3.57774e-08	4.84115e-07	9.36311	WAVE complex interacting protein WIP				sigDown
TGME49_239770	-7.04398	6.8922	-15.5073	2.41456e-09	5.88696e-08	11.9893	alveolin domain containing intermediate filament IMC11				sigDown
TGME49_263750	-7.03617	7.42611	-13.2543	1.45979e-08	2.37759e-07	10.2479	hypothetical protein				sigDown
TGME49_500424	-7.02746	5.91742	-13.9063	8.44557e-09	1.52804e-07	10.7828	radial spoke head protein 3, putative				sigDown
TGME49_272370	-7.00212	10.6725	-14.2369	6.4544e-09	1.24376e-07	11.044	tartrolon E responsive gene				sigDown
TGME49_220540	-6.96751	7.76278	-18.732	2.67966e-10	1.11032e-08	14.0371	hypothetical protein				sigDown
TGME49_253790	-6.95518	7.48209	-10.5078	1.95938e-07	1.9489e-06	7.65983	zinc finger (CCCH type) motif-containing protein				sigDown
TGME49_295945	-6.93851	3.50081	-14.3217	6.02996e-09	1.18481e-07	11.1099	hypothetical protein				sigDown
TGME49_201690	-6.90353	6.09805	-12.231	3.62115e-08	4.87514e-07	9.35114	BT1 family protein				sigDown
TGME49_252500	-6.86425	6.44797	-7.65075	5.6649e-06	3.20157e-05	4.22448	polo kinase				sigDown
TGME49_268790	-6.85562	8.94891	-34.6751	1.79319e-13	1.0243e-10	19.8606	dense granule protein GRA58				sigDown
TGME49_230470	-6.83799	3.30375	-14.6064	4.81103e-09	1.00192e-07	11.3281	rhoptry kinase family protein ROP46, putative				sigDown
TGME49_252190	-6.83559	5.23948	-10.6391	1.7095e-07	1.73709e-06	7.79752	KRUF family protein				sigDown
TGME49_257360	-6.82483	7.33786	-11.9905	4.52597e-08	5.89482e-07	9.12944	hypothetical protein				sigDown
TGME49_261740	-6.81543	7.64276	-11.4484	7.59104e-08	8.92729e-07	8.61327	rhoptry protein ROP47				sigDown
TGME49_500370	-6.8111	4.57241	-15.7761	1.97955e-09	5.07388e-08	12.1782	histidine phosphatase, putative				sigDown
TGME49_254720	-6.80139	6.58881	-16.3502	1.30839e-09	3.64469e-08	12.5698	dense granule protein GRA8	GRA8	Sporulated		sigDown
TGME49_249425	-6.78742	6.57699	-9.5754	5.38552e-07	4.44917e-06	6.63472	hypothetical protein				sigDown
TGME49_500174	-6.76892	4.11389	-6.24304	4.16172e-05	0.000175257	2.16732	KRUF family protein				sigDown
TGME49_292275	-6.76743	3.21292	-7.80866	4.59982e-06	2.65786e-05	4.43881	SAG-related sequence SRS36E				sigDown
TGME49_264150	-6.76284	6.0245	-7.72995	5.10116e-06	2.90555e-05	4.33237	hypothetical protein				sigDown
TGME49_315770	-6.74507	10.4344	-19.1609	2.05516e-10	8.88386e-09	14.2772	cytochrome p450				sigDown
TGME49_292960	-6.72427	7.74799	-11.7996	5.41738e-08	6.80107e-07	8.95032	hypothetical protein				sigDown
TGME49_292390	-6.7206	2.95845	-5.75045	8.90119e-05	0.000334821	1.38243	KRUF family protein				sigDown
TGME49_288455	-6.70075	3.71991	-9.33075	7.11271e-07	5.59295e-06	6.35139	hypothetical protein				sigDown
TGME49_262470	-6.68955	8.13638	-14.261	6.33073e-09	1.22287e-07	11.0627	C protein immunoglobulin-A-binding beta antigen, putative				sigDown
TGME49_500297	-6.66985	3.9289	-13.2942	1.41068e-08	2.31172e-07	10.2815	hypothetical protein, conserved				sigDown
TGME49_203310	-6.64116	11.1262	-13.8456	8.87781e-09	1.58473e-07	10.7342	dense granule protein GRA7	GRA7	Sporulated		sigDown
TGME49_323110	-6.63917	4.45922	-11.5362	6.97135e-08	8.35831e-07	8.69847	hypothetical protein				sigDown
TGME49_291960	-6.63648	7.64152	-18.877	2.44817e-10	1.03042e-08	14.1191	rhoptry kinase family protein ROP40 (incomplete catalytic triad)				sigDown
TGME49_260825	-6.63255	7.74921	-21.955	4.13856e-11	3.18231e-09	15.6888	hypothetical protein				sigDown
TGME49_213700	-6.63236	5.55963	-5.91144	6.91714e-05	0.000270628	1.64273	coiled-coil domain-containing protein				sigDown
TGME49_257010	-6.62271	6.38791	-9.77572	4.30624e-07	3.73098e-06	6.86214	toxolysin TLN3				sigDown
TGME49_288440	-6.62166	6.9685	-11.4065	7.90743e-08	9.20462e-07	8.5724	NEK kinase				sigDown
TGME49_277685	-6.61762	4.41638	-11.5998	6.5567e-08	7.95659e-07	8.75977	hypothetical protein				sigDown
TGME49_233950	-6.57082	9.44726	-14.4762	5.33194e-09	1.08222e-07	11.2289	hypothetical protein				sigDown
TGME49_297340	-6.57034	9.40222	-16.235	1.42024e-09	3.88962e-08	12.4925	hypothetical protein				sigDown
TGME49_208830	-6.53984	4.53326	-9.35916	6.88461e-07	5.44034e-06	6.38462	dense granule protein GRA16				sigDown
TGME49_227100	-6.51029	8.71907	-12.3512	3.2436e-08	4.4955e-07	9.46037	glutaredoxin 5				sigDown
TGME49_311840	-6.50906	6.92978	-13.7052	9.97391e-09	1.73394e-07	10.6207	hypothetical protein				sigDown
TGME49_258810	-6.50229	2.34903	-8.67644	1.54013e-06	1.07007e-05	5.56197	SAG-related sequence SRS27B				sigDown
TGME49_310390	-6.50191	8.69517	-20.3445	1.01622e-10	5.72301e-09	14.9059	hypothetical protein				sigDown
TGME49_209920	-6.48987	4.15609	-8.35195	2.29634e-06	1.48096e-05	5.15254	PAN domain-containing protein				sigDown
TGME49_292280	-6.48548	3.22199	-7.21791	1.01814e-05	5.24957e-05	3.62045	SAG-related sequence SRS36D				sigDown
TGME49_219230	-6.47687	10.3309	-15.5639	2.31507e-09	5.67902e-08	12.0294	AMP-binding enzyme domain-containing protein				sigDown
TGME49_271610	-6.4525	8.17741	-19.3596	1.82081e-10	8.28832e-09	14.3862	pyrroline-5-carboxylate reductase				sigDown
TGME49_259205	-6.43425	3.9562	-8.50729	1.894e-06	1.27602e-05	5.35008	hypothetical protein				sigDown
TGME49_241130	-6.41539	6.6451	-12.6737	2.42526e-08	3.55868e-07	9.74811	CKK domain-containing protein				sigDown
TGME49_202445	-6.41124	2.21571	-8.77967	1.35949e-06	9.58717e-06	5.68968	hypothetical protein				sigDown
TGME49_201520	-6.4097	6.86022	-11.8815	5.01377e-08	6.41522e-07	9.0275	protein phosphatase PPM3G, putative				sigDown
TGME49_500374	-6.40416	7.24881	-24.2598	1.26943e-11	1.49288e-09	16.683	hypothetical protein, conserved				sigDown
TGME49_224620	-6.39652	7.14875	-13.5808	1.1066e-08	1.88689e-07	10.5192	hypothetical protein				sigDown
TGME49_500058	-6.36316	7.51334	-19.9749	1.26075e-10	6.50467e-09	14.7148	ferlin 3, putative				sigDown
TGME49_229010	-6.35135	6.93838	-9.0695	9.63344e-07	7.2285e-06	6.04183	rhoptry neck protein RON4				sigDown
TGME49_211910	-6.34127	6.82138	-28.9773	1.53289e-12	4.5402e-10	18.3459	kinesin-related protein 3A, putative				sigDown
TGME49_267642	-6.30667	6.22335	-19.3076	1.87924e-10	8.44288e-09	14.3578	hypothetical protein				sigDown
TGME49_248730	-6.26821	4.95517	-9.26327	7.68764e-07	5.97454e-06	6.27212	hypothetical protein				sigDown
TGME49_263130	-6.26706	10.6466	-11.5708	6.74233e-08	8.13249e-07	8.73187	citrate synthase, putative				sigDown
TGME49_222370	-6.2563	6.94046	-10.465	2.0492e-07	2.01816e-06	7.61456	SAG-related sequence SRS13				sigDown
TGME49_282160	-6.2481	2.5384	-4.15397	0.00131693	0.00341046	-1.38526	hypothetical protein				sigDown
TGME49_297290	-6.2381	3.17367	-9.10641	9.22556e-07	6.97983e-06	6.08601	hypothetical protein				sigDown
TGME49_233460	-6.23527	8.15287	-6.18097	4.57164e-05	0.000190216	2.07032	SAG-related sequence SRS29B	SAG1	Tachyzoite		sigDown
TGME49_208370	-6.22998	9.00799	-10.2081	2.68995e-07	2.52779e-06	7.33941	dense granule protein GRA46				sigDown
TGME49_214410	-6.19703	8.47056	-23.5352	1.81861e-11	1.91361e-09	16.3851	hypothetical protein				sigDown
TGME49_246940	-6.19376	9.22169	-23.9144	1.50477e-11	1.71909e-09	16.5426	gliding-associated protein GAP80				sigDown
TGME49_288475	-6.14924	8.67798	-9.29592	7.40345e-07	5.78743e-06	6.31054	hypothetical protein				sigDown
TGME49_307020	-6.13636	8.31446	-21.375	5.67683e-11	3.84726e-09	15.4159	hypothetical protein				sigDown
TGME49_500073	-6.13477	8.53075	-14.4104	5.61767e-09	1.12031e-07	11.1784	hypothetical protein, conserved				sigDown
TGME49_210370	-6.11847	7.32542	-10.9885	1.19679e-07	1.28812e-06	8.15658	rhoptry protein ROP54				sigDown
TGME49_230820	-6.11694	8.9918	-11.6329	6.35148e-08	7.7428e-07	8.79154	cell division control protein CDC50.1				sigDown
TGME49_500362	-6.11593	5.23416	-6.67883	2.18379e-05	0.000101348	2.83315	hypothetical protein, conserved				sigDown
TGME49_234950	-6.09503	7.58773	-14.8146	4.08864e-09	8.74247e-08	11.4849	protein kinase (incomplete catalytic triad)				sigDown
TGME49_215140	-6.07622	4.80427	-6.42364	3.17586e-05	0.000138783	2.44648	hypothetical protein				sigDown
TGME49_500368	-6.05815	7.34461	-16.8485	9.23201e-10	2.81788e-08	12.897	hypothetical protein, conserved				sigDown
TGME49_249300	-6.05309	7.5808	-8.27686	2.52281e-06	1.59991e-05	5.05603	hypothetical protein				sigDown
TGME49_237015	-6.04888	8.83458	-21.6833	4.79405e-11	3.42303e-09	15.5622	dense granule protein GRA43				sigDown
TGME49_291860	-6.02869	7.90463	-13.2411	1.47632e-08	2.39962e-07	10.2369	HORMA domain-containing protein				sigDown
TGME49_288600	-6.02568	9.80423	-22.2546	3.52593e-11	2.79177e-09	15.8261	ATG18/WIPI-like protein PROP1				sigDown
TGME49_220720	-6.01291	4.51171	-8.03256	3.44071e-06	2.0845e-05	4.73734	hypothetical protein				sigDown
TGME49_215785	-5.99588	6.96666	-6.40168	3.28121e-05	0.000142608	2.41279	rhoptry protein ROP2A				sigDown
TGME49_244335	-5.98866	4.23265	-14.0318	7.6208e-09	1.41729e-07	10.8827	hypothetical protein				sigDown
TGME49_285870	-5.98286	7.05611	-14.1814	6.75023e-09	1.29452e-07	11.0005	SAG-related sequence SRS20A				sigDown
TGME49_224140	-5.97696	6.57675	-20.0052	1.23854e-10	6.47405e-09	14.7306	hypothetical protein				sigDown
TGME49_268980	-5.97385	8.52373	-7.24092	9.86329e-06	5.11854e-05	3.65318	hypothetical protein				sigDown
TGME49_238200	-5.95915	9.45285	-17.5457	5.75721e-10	1.94263e-08	13.3362	alpha/beta hydrolase fold domain-containing protein				sigDown
TGME49_293470	-5.94656	6.99363	-10.259	2.54764e-07	2.41678e-06	7.39443	immune mapped protein IMP1				sigDown
TGME49_319560	-5.9233	9.71483	-13.8121	9.12723e-09	1.61645e-07	10.7072	microneme protein MIC3				sigDown
TGME49_274140	-5.91956	4.96638	-7.83591	4.43874e-06	2.57408e-05	4.47548	RNA binding protein, putative				sigDown
TGME49_252360	-5.90942	7.33946	-4.82465	0.000407282	0.00123983	-0.184024	rhoptry kinase family protein ROP24 (incomplete catalytic triad)				sigDown
TGME49_220630	-5.90816	7.29389	-5.13958	0.000239555	0.000787392	0.361785	hypothetical protein				sigDown
TGME49_206460	-5.89863	7.62144	-15.8076	1.93436e-09	5.00618e-08	12.2002	hypothetical protein				sigDown
TGME49_249870	-5.89031	7.04693	-18.9872	2.28665e-10	9.67533e-09	14.1808	hypothetical protein				sigDown
TGME49_244515	-5.88517	5.38701	-7.85834	4.3107e-06	2.51381e-05	4.50559	hypothetical protein				sigDown
TGME49_233380	-5.8567	11.4469	-11.3885	8.04781e-08	9.34084e-07	8.55477	hypothetical protein				sigDown
TGME49_500071	-5.82403	8.53725	-16.0028	1.67818e-09	4.45861e-08	12.3348	sugar transporter, putative				sigDown
TGME49_244670	-5.82115	6.07419	-7.96231	3.76656e-06	2.25121e-05	4.64434	hypothetical protein				sigDown
TGME49_239740	-5.81329	10.1679	-8.84269	1.26048e-06	8.99201e-06	5.76704	dense granule protein GRA14				sigDown
TGME49_288450	-5.80264	5.23756	-11.5616	6.80244e-08	8.19264e-07	8.72299	aldehyde dehydrogenase (NAD) family protein				sigDown
TGME49_200230	-5.79938	6.27067	-6.23224	4.23014e-05	0.00017767	2.15048	microneme protein MIC17C				sigDown
TGME49_289600	-5.79311	8.73317	-11.5943	6.59187e-08	7.98714e-07	8.75442	heat shock protein HSP29				sigDown
TGME49_211260	-5.79002	9.12164	-14.9461	3.69347e-09	8.11938e-08	11.5826	rhoptry kinase family protein ROP26 (incomplete catalytic triad)				sigDown
TGME49_309185	-5.77708	4.74724	-17.8092	4.83785e-10	1.6676e-08	13.4968	hypothetical protein				sigDown
TGME49_242700	-5.75467	8.84492	-14.9512	3.67897e-09	8.11938e-08	11.5864	WD repeat-containing protein				sigDown
TGME49_286670	-5.73234	8.02332	-15.6327	2.20003e-09	5.45811e-08	12.0779	hypothetical protein				sigDown
TGME49_293620	-5.71479	4.22055	-8.49636	1.91968e-06	1.28881e-05	5.33627	hypothetical protein				sigDown
TGME49_309230	-5.71409	3.37551	-7.31236	8.94124e-06	4.70725e-05	3.75435	hypothetical protein				sigDown
TGME49_500415	-5.69741	7.58739	-11.2594	9.13517e-08	1.03476e-06	8.42778	Myb domain-containing protein				sigDown
TGME49_212990	-5.69141	9.06066	-14.5555	5.00761e-09	1.03746e-07	11.2895	IMC sutures component ISC3 paralog				sigDown
TGME49_282130	-5.68989	8.31654	-20.8136	7.76947e-11	4.79951e-09	15.1422	hypothetical protein				sigDown
TGME49_292270	-5.68465	2.96748	-5.05637	0.000275251	0.000887933	0.218823	SAG-related sequence SRS36C				sigDown
TGME49_225540	-5.68455	9.58784	-15.1745	3.10129e-09	7.31594e-08	11.7502	hypothetical protein				sigDown
TGME49_304880	-5.6638	8.62983	-16.4642	1.20706e-09	3.44745e-08	12.6457	hypothetical protein				sigDown
TGME49_273300	-5.66009	3.05408	-7.62092	5.89419e-06	3.30314e-05	4.18363	hypothetical protein				sigDown
TGME49_219730	-5.65763	7.89492	-11.2028	9.66178e-08	1.08063e-06	8.37156	hypothetical protein				sigDown
TGME49_316510	-5.61723	8.35804	-19.3566	1.82411e-10	8.28832e-09	14.3845	zinc finger (CCCH type) motif-containing protein				sigDown
TGME49_293760	-5.61427	9.14631	-31.7436	5.15991e-13	2.06319e-10	19.1378	EF hand domain-containing protein				sigDown
TGME49_238440	-5.6048	8.38399	-12.2488	3.56232e-08	4.83665e-07	9.3674	SAG-related sequence SRS22A	SRS22A	Bradyzoite	SRS22A	sigDown
TGME49_211340	-5.60343	9.03994	-16.513	1.16627e-09	3.36703e-08	12.678	hypothetical protein				sigDown
TGME49_213720	-5.60069	8.94018	-21.8907	4.28423e-11	3.20775e-09	15.6591	dynein regulatory complex subunit 7, putative				sigDown
TGME49_246763	-5.59832	1.72484	-8.26053	2.57515e-06	1.62537e-05	5.03495	hypothetical protein				sigDown
TGME49_211850	-5.59107	7.21541	-9.58983	5.29879e-07	4.40483e-06	6.65124	hypothetical protein				sigDown
TGME49_284420	-5.58335	5.61728	-8.93669	1.12688e-06	8.19242e-06	5.88161	hypothetical protein				sigDown
TGME49_245980	-5.57612	4.48431	-14.3918	5.70162e-09	1.13161e-07	11.1641	hypothetical protein				sigDown
TGME49_293430	-5.53844	7.0418	-6.51623	2.76954e-05	0.000123955	2.58783	hypothetical protein				sigDown
TGME49_262050	-5.53344	4.56751	-7.08677	1.22162e-05	6.14809e-05	3.43256	rhoptry kinase family protein ROP39				sigDown
TGME49_215520	-5.53312	7.27461	-8.21412	2.73034e-06	1.71386e-05	4.97488	hypothetical protein				sigDown
TGME49_296020	-5.52972	2.31241	-6.00775	5.95877e-05	0.000238739	1.7967	hypothetical protein				sigDown
TGME49_320150	-5.51788	3.75858	-15.8339	1.89752e-09	4.95898e-08	12.2184	elongation factor Tu GTP binding domain-containing protein				sigDown
TGME49_304670	-5.48421	7.62044	-11.7643	5.60229e-08	6.96758e-07	8.91685	inner membrane complex protein IMC23				sigDown
TGME49_500339	-5.47564	8.00362	-21.9288	4.1972e-11	3.19666e-09	15.6767	thrombospondin type 1 domain-containing protein				sigDown
TGME49_223110	-5.46137	11.1858	-26.4165	4.61533e-12	7.71981e-10	17.4985	glycolipid transfer protein GLTP				sigDown
TGME49_221550	-5.45302	11.1145	-12.3843	3.14737e-08	4.38757e-07	9.49023	CMGC kinase, MAPK family, MEK kinase-related (incomplete catalytic triad)				sigDown
TGME49_220640	-5.44595	7.04617	-14.1499	6.92425e-09	1.31841e-07	10.9758	hypothetical protein				sigDown
TGME49_203740	-5.43268	6.63242	-13.6849	1.01433e-08	1.75576e-07	10.6042	hypothetical protein				sigDown
TGME49_203930	-5.43061	7.63895	-9.76219	4.37127e-07	3.77506e-06	6.84691	hypothetical protein				sigDown
TGME49_313440	-5.42518	8.2452	-6.49826	2.84385e-05	0.000126557	2.56049	dense granule protein GRA59				sigDown
TGME49_236010	-5.42434	9.97128	-11.2482	9.23684e-08	1.04058e-06	8.41668	prenylcysteine oxidase				sigDown
TGME49_220070	-5.42376	3.00217	-8.16813	2.89407e-06	1.79828e-05	4.91508	hypothetical protein				sigDown
TGME49_296121	-5.42117	6.76856	-5.29557	0.00018512	0.000628623	0.627287	hypothetical protein				sigDown
TGME49_309770	-5.41515	9.73591	-17.1333	7.59601e-10	2.43957e-08	13.079	hypothetical protein				sigDown
TGME49_229390	-5.41112	7.30972	-13.5988	1.09007e-08	1.86266e-07	10.5339	hypothetical protein				sigDown
TGME49_240390	-5.41067	7.39451	-12.2339	3.61153e-08	4.87039e-07	9.35378	calcium-dependent protein kinase CDPK4B				sigDown
TGME49_245748	-5.40304	3.8369	-5.32645	0.000175981	0.000602965	0.679457	hypothetical protein				sigDown
TGME49_204050	-5.40288	7.337	-7.46003	7.31407e-06	3.96278e-05	3.96135	subtilisin SUB1				sigDown
TGME49_259630	-5.38646	12.19	-19.0286	2.22903e-10	9.48166e-09	14.2039	inner membrane complex protein IMC27				sigDown
TGME49_257000	-5.37693	8.29944	-15.4136	2.58969e-09	6.27568e-08	11.9225	solute carrier family 13, putative				sigDown
TGME49_286040	-5.37046	3.80247	-6.59689	2.46051e-05	0.000111927	2.70998	hypothetical protein				sigDown
TGME49_289340	-5.34529	5.5416	-12.5951	2.60187e-08	3.78115e-07	9.67864	hypothetical protein				sigDown
TGME49_278815	-5.34379	6.88043	-8.35744	2.28066e-06	1.47441e-05	5.15957	hypothetical protein				sigDown
TGME49_225590	-5.3209	6.96888	-14.9856	3.58277e-09	8.00804e-08	11.6118	hypothetical protein				sigDown
TGME49_223750	-5.30069	7.60504	-14.6325	4.71336e-09	9.84144e-08	11.3479	hypothetical protein				sigDown
TGME49_313760	-5.29821	8.00572	-16.9812	8.42689e-10	2.65314e-08	12.9822	RING zinc finger protein				sigDown
TGME49_213820	-5.28456	8.07852	-11.5332	6.99179e-08	8.37026e-07	8.69554	hypothetical protein				sigDown
TGME49_249570	-5.28308	8.2087	-16.9559	8.57444e-10	2.68901e-08	12.966	hypothetical protein				sigDown
TGME49_279100	-5.2585	7.9886	-12.4685	2.91598e-08	4.15502e-07	9.56587	mitochondrial association factor 1a				sigDown
TGME49_248900	-5.25545	8.42028	-14.2899	6.18569e-09	1.20651e-07	11.0852	hypothetical protein				sigDown
TGME49_248677	-5.2489	8.46939	-11.1803	9.87965e-08	1.09733e-06	8.34919	nucleic acid binding protein, putative				sigDown
TGME49_288220	-5.23725	9.74516	-10.026	3.27304e-07	2.96092e-06	7.14061	CAP domain-containing protein				sigDown
TGME49_291890	-5.22394	9.03449	-8.15378	2.94726e-06	1.82707e-05	4.89637	microneme protein MIC1	MIC1	Tachyzoite		sigDown
TGME49_285820	-5.21836	2.09303	-5.93481	6.67047e-05	0.000262777	1.68022	hypothetical protein				sigDown
TGME49_221470	-5.21128	10.9297	-29.4833	1.24686e-12	3.98845e-10	18.4997	hypothetical protein				sigDown
TGME49_215910	-5.21119	9.57811	-10.5915	1.79577e-07	1.81522e-06	7.74785	hypothetical protein				sigDown
TGME49_257810	-5.20992	2.6779	-7.11559	1.17346e-05	5.94689e-05	3.47404	hypothetical protein				sigDown
TGME49_247195	-5.19858	10.0278	-13.4086	1.27967e-08	2.11883e-07	10.377	rhoptry discharge factor RDF1				sigDown
TGME49_239550	-5.1953	6.60512	-12.2801	3.46159e-08	4.7159e-07	9.39586	dynein light chain 2B, cytoplasmic, putative				sigDown
TGME49_225170	-5.19273	9.36755	-13.3716	1.32061e-08	2.18194e-07	10.3462	hypothetical protein				sigDown
TGME49_214220	-5.19072	11.9584	-12.7384	2.28949e-08	3.39642e-07	9.805	hypothetical protein				sigDown
TGME49_249370	-5.18884	11.9205	-18.8659	2.46504e-10	1.03209e-08	14.1128	translation initiation factor SUI1, putative				sigDown
TGME49_309990	-5.17606	9.33151	-21.568	5.10544e-11	3.55028e-09	15.5079	hypothetical protein				sigDown
TGME49_223900	-5.17342	9.75565	-13.3692	1.3233e-08	2.18194e-07	10.3442	hypothetical protein				sigDown
TGME49_295360	-5.17238	9.23894	-12.0661	4.21773e-08	5.55671e-07	9.19961	inner membrane complex protein IMC18				sigDown
TGME49_275320	-5.17072	9.93527	-14.3916	5.70262e-09	1.13161e-07	11.1639	penicillin amidase				sigDown
TGME49_273790	-5.17017	10.3888	-13.0849	1.68931e-08	2.62829e-07	10.1045	hypothetical protein				sigDown
TGME49_271015	-5.16577	4.18498	-12.6811	2.40929e-08	3.54826e-07	9.75463	hypothetical protein				sigDown
TGME49_230980	-5.1555	8.33409	-12.221	3.65457e-08	4.90362e-07	9.34202	myosin I				sigDown
TGME49_500289	-5.15497	6.83736	-7.22472	1.00861e-05	5.21048e-05	3.63015	hypothetical protein, conserved				sigDown
TGME49_323100	-5.15061	6.35762	-24.9784	8.97747e-12	1.17409e-09	16.9661	hypothetical protein				sigDown
TGME49_275390	-5.1461	4.1057	-2.69698	0.0193112	0.0346337	-4.07234	hypothetical protein				sigDown
TGME49_217940	-5.13568	5.14265	-10.4586	2.06297e-07	2.02922e-06	7.6078	hypothetical protein				sigDown
TGME49_253690	-5.124	8.65882	-15.1945	3.0547e-09	7.22734e-08	11.7647	hypothetical protein				sigDown
TGME49_231992	-5.12241	3.52773	-11.0585	1.1155e-07	1.217e-06	8.22728	hypothetical protein				sigDown
TGME49_280480	-5.11877	7.29004	-9.76312	4.36674e-07	3.77506e-06	6.84796	EF hand domain-containing protein				sigDown
TGME49_229680	-5.11297	7.18869	-15.0666	3.36712e-09	7.78233e-08	11.6714	hypothetical protein				sigDown
TGME49_269420	-5.107	5.32719	-7.8939	4.1157e-06	2.42187e-05	4.55319	hypothetical protein				sigDown
TGME49_258730	-5.09569	10.254	-20.1624	1.1296e-10	6.14517e-09	14.8123	hypothetical protein				sigDown
TGME49_253130	-5.08269	7.64628	-21.2501	6.08312e-11	3.95735e-09	15.3559	transporter, major facilitator family protein				sigDown
TGME49_277730	-5.07956	3.8717	-5.65464	0.000103606	0.000381461	1.22577	hypothetical protein				sigDown
TGME49_500328	-5.069	7.06086	-24.5519	1.10141e-11	1.35507e-09	16.7995	hypothetical protein, conserved				sigDown
TGME49_500074	-5.06695	6.0499	-15.5482	2.34221e-09	5.72803e-08	12.0183	DUF4200 domain-containing protein				sigDown
TGME49_270273	-5.06681	6.54398	-19.283	1.90754e-10	8.47476e-09	14.3443	hypothetical protein				sigDown
TGME49_223430	-5.06196	4.10809	-4.24894	0.00111156	0.00295322	-1.21234	hypothetical protein				sigDown
TGME49_309885	-5.0277	7.10889	-11.9069	4.89511e-08	6.3139e-07	9.05137	hypothetical protein				sigDown
TGME49_291650	-5.02657	7.14811	-9.807	4.1598e-07	3.62618e-06	6.89729	hypothetical protein				sigDown
TGME49_296015	-5.02211	7.12897	-8.90198	1.17435e-06	8.50657e-06	5.83943	rhoptry kinase family protein				sigDown
TGME49_500227	-4.98327	7.29282	-9.41117	6.48718e-07	5.17228e-06	6.44521	dynein heavy chain, putative				sigDown
TGME49_280460	-4.98163	8.39002	-12.4169	3.05555e-08	4.29441e-07	9.51956	AP2 domain transcription factor AP2VIIa-2				sigDown
TGME49_253940	-4.98129	8.77982	-13.51	1.17452e-08	1.98996e-07	10.4609	CAM Kinase family, incomplete catalytic triad				sigDown
TGME49_250840	-4.97564	8.18299	-14.994	3.55977e-09	8.00804e-08	11.618	myosin light chain MLC3				sigDown
TGME49_316150	-4.95616	7.32414	-13.2296	1.49103e-08	2.41372e-07	10.2271	ULK kinase				sigDown
TGME49_253820	-4.95141	11.1779	-13.6706	1.02651e-08	1.76918e-07	10.5926	hypothetical protein				sigDown
TGME49_232590	-4.93831	11.2961	-12.3248	3.32289e-08	4.58548e-07	9.43642	glutamate-cysteine ligase, catalytic subunit domain-containing protein				sigDown
TGME49_315160	-4.92259	7.34285	-5.80244	8.20182e-05	0.000311874	1.46689	rhoptry apical surface protein RASP2				sigDown
TGME49_239855	-4.9204	5.79227	-5.872	7.35545e-05	0.000284712	1.57931	Ras-associated protein Rap1 isoform 1 family protein				sigDown
TGME49_263560	-4.91993	8.01475	-7.78459	4.74732e-06	2.73321e-05	4.40634	hypothetical protein				sigDown
TGME49_205265	-4.91835	7.61919	-11.8649	5.09318e-08	6.47539e-07	9.01184	transporter, cation channel family protein				sigDown
TGME49_265205	-4.91631	7.57678	-9.69286	4.7215e-07	3.99839e-06	6.76857	WD domain, G-beta repeat-containing protein				sigDown
TGME49_252210	-4.91268	9.5145	-15.9019	1.80577e-09	4.75024e-08	12.2654	pentatricopeptide repeat domain-containing protein				sigDown
TGME49_273310	-4.90346	8.83231	-14.4491	5.44754e-09	1.09654e-07	11.2081	hypothetical protein				sigDown
TGME49_285930	-4.88964	6.99908	-11.0418	1.13438e-07	1.23424e-06	8.21041	hypothetical protein				sigDown
TGME49_270700	-4.88126	6.71806	-10.6551	1.68145e-07	1.71577e-06	7.81421	membrane protein MYR2				sigDown
TGME49_254640	-4.88076	6.59645	-10.0909	3.05082e-07	2.81076e-06	7.21189	DNA polymerase delta subunit 4, putative				sigDown
TGME49_254635	-4.87893	4.98132	-12.4313	3.01599e-08	4.25377e-07	9.53247	hypothetical protein				sigDown
TGME49_241000	-4.85936	8.14031	-18.0416	4.15809e-10	1.48448e-08	13.636	rhoptry protein ROP51				sigDown
TGME49_320780	-4.84986	1.67754	-7.61239	5.96154e-06	3.32922e-05	4.17193	hypothetical protein				sigDown
TGME49_283810	-4.84171	5.62527	-7.02256	1.33667e-05	6.64347e-05	3.33973	hypothetical protein				sigDown
TGME49_305100	-4.81745	4.72808	-8.54024	1.81878e-06	1.23156e-05	5.39161	hypothetical protein				sigDown
TGME49_293060	-4.80954	9.52812	-18.5873	2.93438e-10	1.15597e-08	13.9546	SPRY domain-containing protein				sigDown
TGME49_249340	-4.79569	9.4932	-14.8894	3.85848e-09	8.41487e-08	11.5406	hypothetical protein				sigDown
TGME49_500200	-4.784	8.56921	-7.49865	6.94286e-06	3.79142e-05	4.015	intraconoidal microtubule-associated protein ICMAP3				sigDown
TGME49_258470	-4.78392	11.7832	-7.93442	3.90492e-06	2.31316e-05	4.60725	inner membrane complex protein IMC24				sigDown
TGME49_271935	-4.78034	8.16328	-6.88502	1.62378e-05	7.89864e-05	3.13897	hypothetical protein				sigDown
TGME49_231860	-4.77659	3.69172	-4.85038	0.000389797	0.00119387	-0.138944	hypothetical protein				sigDown
TGME49_220370	-4.76955	7.17528	-17.7305	5.09465e-10	1.74111e-08	13.4491	hypothetical protein				sigDown
TGME49_500063	-4.7657	6.58317	-8.5906	1.70992e-06	1.16873e-05	5.45486	hypothetical protein, conserved				sigDown
TGME49_220420	-4.76064	6.86809	-8.5039	1.90192e-06	1.28028e-05	5.3458	3'5'-cyclic nucleotide phosphodiesterase PDE5				sigDown
TGME49_236890	-4.76021	9.68534	-17.8851	4.60356e-10	1.60064e-08	13.5425	dense granule protein GRA37				sigDown
[truncated: 6,422 more rows]

## Sheet: 5.3. EES2_vs_EES1
Gene_ID	logFC	AveExpr	t	P.Value	adj.P.Val	B	Product Description	Gene_name	MarkerStage	label	Category
[truncated: 7,997 more rows]

[truncated: 8 more sheets: 5.4. EES3_vs_EES2, 5.5.EES4_vs_EES3, 5.6. EES5_vs_EES2, 5.7. EES5_vs_EES4, 5.8. Sporulated_vs_Sporulating, 5.9. Sporulated_vs_Tachyzoite, 5.10.Sporulating_vsUnsporulated, 5.11.Unsporulated_Vs_EES5]
